# Supplementary material for: Life-cycle-related gene expression patterns in the brown algae
Source: bioRxiv preprint, doi:10.1101/2025.04.25.649966, version 3 (2025-08-12)
Supplement: Table S2 [file 649966_file21.xlsx]

## Sheet: A. Overview
Species	Total number of genes	Total number of expressed genes	Number of sporophyte-biased genes	Number of sporophyte-specific genes	Number of gametophyte-biased genes	Number of gametophyte-specific genes	Number of unbiased genes	Percent of sporophyte-biased genes	Percent of sporophyte-specific genes	Percent of gametophyte-biased genes	Percent of gametophyte-specific genes
Macrocystis pyrifera	22998	9605	1157	403	1521	435	6089	0.120458	0.0419573	0.158355	0.0452889
Saccharina latissima	17672	15962	1908	324	1931	1114	10685	0.119534	0.0202982	0.120975	0.0697908
Saccharina japonica	18733	14989	2078	1037	1805	963	9106	0.138635	0.0691841	0.120422	0.0642471
Saccorhiza polyschides	19747	16465	2975	272	1859	2323	9036	0.180686	0.0165199	0.112906	0.141087
Myriotrichia clavaeformis	21281	18181	498	46	809	582	16246	0.0273912	0.00253011	0.044497	0.0320114
Pylaiella littoralis	22501	16006	701	292	625	580	13808	0.0437961	0.0182432	0.0390479	0.0362364
Dictyota dichotoma	20583	16234	82	35	62	200	15855	0.00505113	0.00215597	0.00381915	0.0123198
Sphacelaria rigidula	14181	10511	469	44	385	151	9462	0.0446199	0.00418609	0.0366283	0.0143659
Ectocarpus species 7	25215	13262	497	149	784	1376	10456	0.0374755	0.0112351	0.0591163	0.103755
Scytosiphon promiscuus	19218	17888	1013	321	1949	822	13783	0.0566301	0.017945	0.108956	0.0459526

## Sheet: B. GBGs
Species	Protein ID	log2 fold change (DESeq2)	log2 fold change standard error (DESeq2)	Adjusted p-value (DESeq2)	Mean gametophyte TPM	Mean sporophyte TPM	Standard deviation for gametophyte TPM	Standard deviation for sporophyte TPM	Generation bias
Dictyota dichotoma	prot_D-dichotoma_M_contig375.12517.1	-0.0173209	0.426035	0.993594	20.1437	20.4359	11.111	5.46058	unbiased
Dictyota dichotoma	prot_D-dichotoma_M_contig375.12518.1	1.02553	0.449181	0.245626	1.40434	0.730329	0.665121	0.399507	unbiased
Dictyota dichotoma	prot_D-dichotoma_M_contig375.12520.1	-0.166872	0.333784	0.890288	7.95963	9.04081	4.4337	3.49331	unbiased
Dictyota dichotoma	prot_D-dichotoma_M_contig376.12538.1	-0.751115	0.37288	0.346329	10.1365	18.3311	4.04286	9.97566	unbiased
Dictyota dichotoma	prot_D-dichotoma_M_contig376.12539.1	-0.630158	0.339572	0.405379	12.3087	19.7303	5.77636	9.11044	unbiased
Dictyota dichotoma	prot_D-dichotoma_M_contig376.12543.1	-0.563011	0.269132	0.32014	16.4436	25.5999	6.15223	11.4003	unbiased
Dictyota dichotoma	prot_D-dichotoma_M_contig377.12555.1	0.488557	1.79252	0.948817	0.0735134	0.0510732	0.106957	0.0931851	not_expressed
Dictyota dichotoma	prot_D-dichotoma_M_contig377.12559.1	-0.61719	0.55987	0.690922	1.86461	2.91269	1.41269	1.21824	unbiased
Dictyota dichotoma	prot_D-dichotoma_M_contig1230.1828.1	-0.12516	0.42791	0.945442	3.86468	4.39183	2.26164	2.25595	unbiased
Dictyota dichotoma	prot_D-dichotoma_M_contig1230.1830.1	-0.490502	0.488864	0.727017	3.07824	4.48787	2.5353	2.51784	unbiased
Dictyota dichotoma	prot_D-dichotoma_M_contig1232.1839.1	0.0824586	0.185524	0.905502	62.7724	62.0848	13.6938	13.9312	unbiased
Dictyota dichotoma	prot_D-dichotoma_M_contig1232.1840.1	-0.384649	0.354639	0.697563	23.5425	31.1754	12.4254	14.2575	unbiased
Dictyota dichotoma	prot_D-dichotoma_M_contig1234.1853.1	-0.199278	0.197511	0.724744	9.6711	11.8377	2.80061	4.32784	unbiased
Dictyota dichotoma	prot_D-dichotoma_M_contig1234.1854.1	0.470369	1.01265	0.899489	0.337003	0.262718	0.394731	0.170342	not_expressed
Dictyota dichotoma	prot_D-dichotoma_M_contig1235.1858.1	0.688926	1.07482	0.84657	1.07928	0.73503	0.9491	1.04132	unbiased
Dictyota dichotoma	prot_D-dichotoma_M_contig1235.1859.1	-0.0406005	0.889447	0.993391	2.15244	2.38507	1.89084	3.24202	unbiased
Dictyota dichotoma	prot_D-dichotoma_M_contig1235.1860.1	-0.353561	0.373447	0.745809	23.6098	31.9352	10.8876	13.0999	unbiased
Dictyota dichotoma	prot_D-dichotoma_M_contig1235.1866.1	0.0295604	0.47751	0.991411	2.00705	2.01383	0.9146	1.25864	unbiased
Dictyota dichotoma	prot_D-dichotoma_M_contig1533.3777.1	0.715219	0.387937	0.410632	20.1182	12.8372	7.73675	6.3874	unbiased
Dictyota dichotoma	prot_D-dichotoma_M_contig1534.3779.1	-0.433695	1.52854	0.946856	0.238714	0.345688	0.343727	0.400269	not_expressed
Dictyota dichotoma	prot_D-dichotoma_M_contig11.869.1	-0.608359	0.305745	0.355353	4.14844	6.59091	1.70093	2.53652	unbiased
Dictyota dichotoma	prot_D-dichotoma_M_contig368.12328.1	1.42205	1.23276	0.673413	1.49288	0.616291	2.97362	0.719285	unbiased
Dictyota dichotoma	prot_D-dichotoma_M_contig368.12329.1	-0.408565	0.813899	0.889977	1.31305	0.657547	2.73721	0.467815	unbiased
Dictyota dichotoma	prot_D-dichotoma_M_contig368.12330.1	-0.783916	0.473332	0.483723	4.98227	9.21133	2.54482	4.85267	unbiased
Dictyota dichotoma	prot_D-dichotoma_M_contig368.12332.1	0.32812	1.3751	0.95694	0.17876	0.164862	0.228315	0.325502	not_expressed
Dictyota dichotoma	prot_D-dichotoma_M_contig368.12336.1	0.367749	0.453746	0.792391	2.78019	2.29411	0.996693	1.49984	unbiased
Dictyota dichotoma	prot_D-dichotoma_M_contig369.12366.1	-2.06401	1.18536	0.44906	1.17418	5.3262	1.58402	8.2301	unbiased
Dictyota dichotoma	prot_D-dichotoma_M_contig369.12377.1	-0.190098	0.268953	0.826314	3.78578	4.69985	1.36155	2.35478	unbiased
Dictyota dichotoma	prot_D-dichotoma_M_contig370.12416.1	-1.05538	0.611322	0.454486	2.27152	4.96995	2.10165	4.22971	unbiased
Dictyota dichotoma	prot_D-dichotoma_M_contig474.14776.1	0.685829	0.375441	0.416737	13.5305	9.11627	5.21022	3.95849	unbiased
Dictyota dichotoma	prot_D-dichotoma_M_contig475.14784.1	-1.08652	0.418579	0.158423	1.13174	2.51617	0.68776	1.21952	unbiased
Dictyota dichotoma	prot_D-dichotoma_M_contig475.14787.1	-0.33191	1.01064	0.935777	3.38532	4.63869	3.53134	6.72662	unbiased
Dictyota dichotoma	prot_D-dichotoma_M_contig476.14800.1	-0.328899	1.58784	0.965807	45.3007	59.9693	52.3335	23.1013	unbiased
Dictyota dichotoma	prot_D-dichotoma_M_contig476.14803.1	3.63969	2.61274	0.585084	0.19838	0	0.381248	0	not_expressed
Dictyota dichotoma	prot_D-dichotoma_M_contig10.41.1	0.365242	0.622832	0.864137	1.4858	1.25289	1.47478	1.12088	unbiased
Dictyota dichotoma	prot_D-dichotoma_M_contig10.42.1	-0.169955	0.472483	0.927968	2.22978	2.62422	1.37651	1.57407	unbiased
Dictyota dichotoma	prot_D-dichotoma_M_contig10.44.1	0.350572	0.387887	0.760614	5.21447	4.35731	3.19766	2.70768	unbiased
Dictyota dichotoma	prot_D-dichotoma_M_contig10.55.1	-0.977498	0.86287	0.681471	4.22792	9.29037	5.12567	13.9357	unbiased
Dictyota dichotoma	prot_D-dichotoma_M_contig10.65.1	0.436053	1.0167	0.909239	0.953897	0.697629	0.528228	1.3046	not_expressed
Dictyota dichotoma	prot_D-dichotoma_M_contig10.73.1	-0.893304	3.25801		0	0.0550036	0	0.122992	not_expressed
Dictyota dichotoma	prot_D-dichotoma_M_contig9.19739.1	-0.554804	0.455138	0.648636	20.4051	30.9828	10.4157	19.6483	unbiased
Dictyota dichotoma	prot_D-dichotoma_M_contig9.19740.1	-0.470661	0.484312	0.738046	9.12395	13.1652	5.44119	8.36878	unbiased
Dictyota dichotoma	prot_D-dichotoma_M_contig9.19745.1	-0.109421	0.338345	0.937045	7.44593	8.58486	2.95828	4.15208	unbiased
Dictyota dichotoma	prot_D-dichotoma_M_contig1436.3190.1				0	0	0	0	not_expressed
Dictyota dichotoma	prot_D-dichotoma_M_contig1436.3191.1	0.772351	2.56477		0.0747232	0.049784	0.102665	0.11132	not_expressed
Dictyota dichotoma	prot_D-dichotoma_M_contig1439.3207.1	0.688903	1.86303	0.925022	4.29593	0.460911	11.1673	0.845068	unbiased
Dictyota dichotoma	prot_D-dichotoma_M_contig1441.3229.1	-0.604768	3.25801		0.0154542	0.049784	0.0488705	0.11132	not_expressed
Dictyota dichotoma	prot_D-dichotoma_M_contig1441.3230.1				0	0	0	0	not_expressed
Dictyota dichotoma	prot_D-dichotoma_M_contig1442.3242.1	-0.821933	0.553148	0.547181	9.74115	17.9004	7.33125	10.6519	unbiased
Dictyota dichotoma	prot_D-dichotoma_M_contig556.16260.1	0.141713	0.328739	0.908272	2.77147	2.61044	1.24102	1.16427	unbiased
Dictyota dichotoma	prot_D-dichotoma_M_contig556.16261.1	0.403006	0.228367	0.441225	1.9341	1.54871	0.443873	0.3736	unbiased
Dictyota dichotoma	prot_D-dichotoma_M_contig556.16268.1	0.353597	0.201377	0.444247	36.5383	30.5043	6.15819	3.34813	unbiased
Dictyota dichotoma	prot_D-dichotoma_M_contig556.16272.1	4.04808	1.01836	0.00680735	0.744902	0.0467493	1.31424	0.0326073	not_expressed
Dictyota dichotoma	prot_D-dichotoma_M_contig556.16273.1	4.78458	1.49642	0.0539329	0.67855	0.0246966	1.253	0.0338652	not_expressed
Dictyota dichotoma	prot_D-dichotoma_M_contig557.16283.1	-0.0506191	0.223718	0.961115	70.1789	75.677	21.0833	21.7002	unbiased
Dictyota dichotoma	prot_D-dichotoma_M_contig558.16289.1	-0.645652	0.48337	0.604259	71.5863	115.79	46.3537	90.619	unbiased
Dictyota dichotoma	prot_D-dichotoma_M_contig559.16308.1	6.1326	3.19665	0.383038	1.62814	0	2.98405	0	unbiased
Dictyota dichotoma	prot_D-dichotoma_M_contig559.16311.1	0.730465	0.46184	0.513836	4.87022	3.16163	2.95046	1.49174	unbiased
Dictyota dichotoma	prot_D-dichotoma_M_contig5381.15969.1	0.414001	0.465832	0.765815	3.30695	2.64609	2.08931	1.34926	unbiased
Dictyota dichotoma	prot_D-dichotoma_M_contig5389.15972.1	0.367043	0.239765	0.529958	16.8157	13.7498	4.64639	3.22777	unbiased
Dictyota dichotoma	prot_D-dichotoma_M_contig5389.15973.1	0.258862	0.284162	0.758614	12.8635	11.4854	4.68035	2.13413	unbiased
Dictyota dichotoma	prot_D-dichotoma_M_contig5399.15987.1	0.331853	0.354889	0.750117	16.1812	13.2179	7.39166	3.94253	unbiased
Dictyota dichotoma	prot_D-dichotoma_M_contig5413.16038.1	0.585812	0.583126	0.726467	0.357368	0.246987	0.159311	0.165358	not_expressed
Dictyota dichotoma	prot_D-dichotoma_M_contig5413.16039.1	-0.10789	0.767634	0.978808	0.289253	0.319658	0.201339	0.236736	not_expressed
Dictyota dichotoma	prot_D-dichotoma_M_contig5427.16048.1	1.12902	3.25789		0.0612053	0	0.140997	0	not_expressed
Dictyota dichotoma	prot_D-dichotoma_M_contig809.18934.1	0.211142	0.302425	0.82745	79.642	73.1636	26.9034	19.5161	unbiased
Dictyota dichotoma	prot_D-dichotoma_M_contig810.18958.1	0.00366643	0.86302	0.998804	0.443846	0.482343	0.349013	0.41271	not_expressed
Dictyota dichotoma	prot_D-dichotoma_M_contig811.18968.1	0.933083	0.310681	0.0796158	3.93143	2.16694	1.12006	0.484032	unbiased
Dictyota dichotoma	prot_D-dichotoma_M_contig812.18971.1				0	0	0	0	not_expressed
Dictyota dichotoma	prot_D-dichotoma_M_contig812.18972.1	2.09338	2.45487		0.108616	0.0211634	0.190493	0.0473228	not_expressed
Dictyota dichotoma	prot_D-dichotoma_M_contig813.18975.1	-0.803756	0.573235	0.581767	0.837119	1.58246	0.498384	1.00661	unbiased
Dictyota dichotoma	prot_D-dichotoma_M_contig813.18977.1	1.05015	2.66569		0.0659714	0.023827	0.0921978	0.0532788	not_expressed
Dictyota dichotoma	prot_D-dichotoma_M_contig813.18978.1	1.81858	1.64335	0.690281	0.192705	0.0627238	0.229847	0.0940144	not_expressed
Dictyota dichotoma	prot_D-dichotoma_M_contig1833.5433.1	-0.366233	0.382442	0.742668	5.65655	7.31099	2.26721	3.30169	unbiased
Dictyota dichotoma	prot_D-dichotoma_M_contig1833.5434.1	-0.122898	0.436708	0.947014	6.71217	7.41932	2.92318	3.57905	unbiased
Dictyota dichotoma	prot_D-dichotoma_M_contig1834.5437.1	0.837903	3.25801		0.0429135	0	0.0905616	0	not_expressed
Dictyota dichotoma	prot_D-dichotoma_M_contig1834.5438.1	2.34056	0.832081	0.112055	1.9043	0.40929	1.55691	0.45005	unbiased
Dictyota dichotoma	prot_D-dichotoma_M_contig1837.5447.1	0.0277216	0.204057	0.979588	9.86963	10.3041	1.97862	3.48593	unbiased
Dictyota dichotoma	prot_D-dichotoma_M_contig1838.5451.1	0.136613	0.36348	0.923264	17.7235	16.5148	7.38106	10.3709	unbiased
Dictyota dichotoma	prot_D-dichotoma_M_contig1839.5453.1	-0.128151	0.310382	0.913797	9.01706	10.6611	2.43453	6.24266	unbiased
Dictyota dichotoma	prot_D-dichotoma_M_contig1839.5454.1	0.0481589	0.328358	0.977809	15.005	15.7049	4.98427	8.51731	unbiased
Dictyota dichotoma	prot_D-dichotoma_M_contig2476.8501.1	0.986337	0.740222	0.605733	0.860866	0.457552	0.452048	0.501686	not_expressed
Dictyota dichotoma	prot_D-dichotoma_M_contig2480.8522.1	0.255138	0.402109	0.847719	4.31457	3.97775	2.2604	2.12409	unbiased
Dictyota dichotoma	prot_D-dichotoma_M_contig70.17904.1	-0.303878	0.402866	0.808428	35.4833	45.4908	17.6521	24.1054	unbiased
Dictyota dichotoma	prot_D-dichotoma_M_contig71.17991.1				0	0	0	0	not_expressed
Dictyota dichotoma	prot_D-dichotoma_M_contig71.17993.1	2.88695	1.42761	0.344022	0.58362	0.0844266	1.03355	0.05567	not_expressed
Dictyota dichotoma	prot_D-dichotoma_M_contig71.17994.1	-0.487383	0.379161	0.623653	4.81467	7.18335	2.16891	3.39414	unbiased
Dictyota dichotoma	prot_D-dichotoma_M_contig71.17995.1	-0.834215	0.470783	0.436703	2.87034	5.54758	1.62325	3.90009	unbiased
Dictyota dichotoma	prot_D-dichotoma_M_contig71.17997.1	-0.602437	0.489188	0.643824	3.42524	5.63041	1.40288	3.66948	unbiased
Dictyota dichotoma	prot_D-dichotoma_M_contig1140.1176.1	-0.0101703	0.257153	0.993768	18.6527	19.6768	4.22258	5.19707	unbiased
Dictyota dichotoma	prot_D-dichotoma_M_contig1140.1181.1	-0.953164	0.802518	0.65902	0.2151	0.418929	0.129027	0.416382	not_expressed
Dictyota dichotoma	prot_D-dichotoma_M_contig4524.14350.1	-0.584749	0.735262	0.7971	1.7736	2.88083	1.82456	2.7275	unbiased
Dictyota dichotoma	prot_D-dichotoma_M_contig4532.14368.1	-0.205088	0.514619	0.917953	19.9	23.2886	13.5328	10.9644	unbiased
Dictyota dichotoma	prot_D-dichotoma_M_contig4542.14395.1	0.660454	0.764469	0.774462	1.48304	0.995639	0.942958	1.01514	unbiased
Dictyota dichotoma	prot_D-dichotoma_M_contig4543.14396.1	-0.373835	0.41864	0.764546	13.4897	17.8052	8.10155	6.47559	unbiased
Dictyota dichotoma	prot_D-dichotoma_M_contig1199.1602.1	0.574318	0.469909	0.647197	4.57267	3.23526	2.3347	1.67306	unbiased
Dictyota dichotoma	prot_D-dichotoma_M_contig1203.1648.1	-0.19501	0.410396	0.897474	11.2525	14.2791	4.59934	10.3919	unbiased
Dictyota dichotoma	prot_D-dichotoma_M_contig1204.1654.1	-0.0930346	2.42001	0.994096	0.121258	0.129842	0.243238	0.227894	not_expressed
Dictyota dichotoma	prot_D-dichotoma_M_contig1204.1655.1	1.39939	3.25647		0.047565	0	0.0963313	0	not_expressed
Dictyota dichotoma	prot_D-dichotoma_M_contig1204.1656.1	-0.281339	0.504689	0.873952	19.2811	24.379	12.4517	14.4012	unbiased
Dictyota dichotoma	prot_D-dichotoma_M_contig932.20062.1	0.612791	0.32666	0.399088	138.277	99.0321	60.2784	20.6792	unbiased
Dictyota dichotoma	prot_D-dichotoma_M_contig932.20069.1	0.0744238	0.303268	0.955301	81.0415	81.6008	31.7611	38.8512	unbiased
Dictyota dichotoma	prot_D-dichotoma_M_contig933.20073.1	-1.35988	3.22327		0.0130594	0.104305	0.0412973	0.233234	not_expressed
Dictyota dichotoma	prot_D-dichotoma_M_contig933.20074.1				0	0	0	0	not_expressed
Dictyota dichotoma	prot_D-dichotoma_M_contig935.20086.1	-0.598368	1.68738	0.929184	5.72546	8.73824	11.0203	13.6486	unbiased
Dictyota dichotoma	prot_D-dichotoma_M_contig935.20088.1	0.0460397	2.0231	0.996467	7.56342	7.99306	12.0638	10.2388	unbiased
Dictyota dichotoma	prot_D-dichotoma_M_contig937.20100.1	-0.0831705	0.326739	0.953166	2.33813	2.60586	1.01047	1.00227	unbiased
Dictyota dichotoma	prot_D-dichotoma_M_contig3611.12171.1	0.880472	0.837374	0.709236	55.0711	31.1346	77.3219	24.31	unbiased
Dictyota dichotoma	prot_D-dichotoma_M_contig3615.12180.1	0.222937	0.244887	0.758614	87.7489	80.8019	24.9358	10.0624	unbiased
Dictyota dichotoma	prot_D-dichotoma_M_contig3621.12195.1	0.945714	0.393213	0.209236	37.353	19.3688	26.8705	8.95648	unbiased
Dictyota dichotoma	prot_D-dichotoma_M_contig3624.12199.1	2.94768	1.55743	0.391188	0.524656	0.0800425	0.520776	0.17898	not_expressed
Dictyota dichotoma	prot_D-dichotoma_M_contig541.16021.1	-0.386403	0.399478	0.740361	27.4029	38.5715	10.9595	25.7981	unbiased
Dictyota dichotoma	prot_D-dichotoma_M_contig543.16055.1				0	0	0	0	not_expressed
Dictyota dichotoma	prot_D-dichotoma_M_contig543.16056.1	0.549367	3.25801		0.0111761	0	0.0353421	0	not_expressed
Dictyota dichotoma	prot_D-dichotoma_M_contig543.16059.1	-0.382008	0.174403	0.280773	4.95348	6.98511	0.926654	2.44232	unbiased
Dictyota dichotoma	prot_D-dichotoma_M_contig543.16065.1	-0.205414	0.279036	0.81506	7.10727	8.72596	2.50044	3.88597	unbiased
Dictyota dichotoma	prot_D-dichotoma_M_contig717.18064.1	-0.257001	0.560472	0.901496	13.9719	16.8459	8.74255	14.0339	unbiased
Dictyota dichotoma	prot_D-dichotoma_M_contig717.18069.1	-0.366569	0.660629	0.875179	7.90708	10.058	10.5129	3.12702	unbiased
Dictyota dichotoma	prot_D-dichotoma_M_contig719.18085.1	-0.380785	0.294624	0.621188	10.5178	14.5751	3.61122	7.16019	unbiased
Dictyota dichotoma	prot_D-dichotoma_M_contig719.18086.1	0.17055	0.194889	0.770054	38.7589	36.7949	7.21772	10.5408	unbiased
Dictyota dichotoma	prot_D-dichotoma_M_contig719.18088.1	-0.283279	0.201809	0.581058	14.0292	18.1794	3.49934	6.27426	unbiased
Dictyota dichotoma	prot_D-dichotoma_M_contig720.18107.1	1.76562	2.21341	0.796826	4.25409	1.34693	7.2446	2.15328	unbiased
Dictyota dichotoma	prot_D-dichotoma_M_contig2091.6798.1	0.945648	0.53565	0.441103	2.00557	1.09629	1.01755	0.683342	unbiased
Dictyota dichotoma	prot_D-dichotoma_M_contig2092.6806.1	0.699561	1.11163	0.848882	0.501589	0.309746	0.362421	0.365422	not_expressed
Dictyota dichotoma	prot_D-dichotoma_M_contig2097.6816.1	-0.387192	0.273605	0.576545	5.84035	8.03026	2.14377	2.20153	unbiased
Dictyota dichotoma	prot_D-dichotoma_M_contig1467.3383.1	0.549367	3.25801		0.0124036	0	0.0392237	0	not_expressed
Dictyota dichotoma	prot_D-dichotoma_M_contig1467.3385.1	0.251982	1.03047	0.955402	0.451234	0.398454	0.432266	0.181627	not_expressed
Dictyota dichotoma	prot_D-dichotoma_M_contig1471.3407.1	-0.141616	0.255635	0.875179	4.71081	5.39475	1.49454	1.26568	unbiased
Dictyota dichotoma	prot_D-dichotoma_M_contig518.15628.1	1.12516	0.507941	0.272222	6.54102	3.26003	5.26825	1.15896	unbiased
Dictyota dichotoma	prot_D-dichotoma_M_contig519.15639.1	2.34591	0.899721	0.155335	1.53332	0.314992	1.28541	0.302885	unbiased
Dictyota dichotoma	prot_D-dichotoma_M_contig521.15696.1	-0.626095	0.433401	0.565336	31.1574	50.037	17.5317	30.5716	unbiased
Dictyota dichotoma	prot_D-dichotoma_M_contig564.16396.1	0.0457323	0.182217	0.953875	3.04615	3.12592	0.737762	0.799475	unbiased
Dictyota dichotoma	prot_D-dichotoma_M_contig567.16427.1	0.0986604	0.366438	0.949498	6.50959	6.62232	2.32631	3.5265	unbiased
Dictyota dichotoma	prot_D-dichotoma_M_contig567.16431.1	-0.628244	0.716954	0.76964	0.858201	1.40424	0.596666	1.14551	unbiased
Dictyota dichotoma	prot_D-dichotoma_M_contig2917.10093.1	3.75659	3.20979	0.666308	0.244483	0	0.515678	0	not_expressed
Dictyota dichotoma	prot_D-dichotoma_M_contig2919.10094.1	1.71218	0.402395	0.00282209	25.0909	7.71958	16.4962	2.1328	GA_biased
Dictyota dichotoma	prot_D-dichotoma_M_contig2927.10128.1	-0.255899	0.188423	0.595252	6.75794	8.63108	1.41175	2.96311	unbiased
Dictyota dichotoma	prot_D-dichotoma_M_contig2929.10130.1	-0.359402	0.347954	0.714598	25.2662	33.9668	12.884	8.70247	unbiased
Dictyota dichotoma	prot_D-dichotoma_M_contig2609.9000.1	0.012972	0.668754	0.996983	2.04226	2.13129	2.28951	1.22623	unbiased
Dictyota dichotoma	prot_D-dichotoma_M_contig2612.9014.1	-0.183277	0.219139	0.784134	40.1317	48.5435	6.72856	20.4468	unbiased
Dictyota dichotoma	prot_D-dichotoma_M_contig2615.9016.1	0.196567	0.438589	0.904327	5.68216	5.0368	3.92928	2.34814	unbiased
Dictyota dichotoma	prot_D-dichotoma_M_contig2615.9017.1	-0.336743	0.476945	0.8267	2.33503	2.97879	1.84457	1.86494	unbiased
Dictyota dichotoma	prot_D-dichotoma_M_contig2615.9018.1	1.08732	1.01446	0.703173	0.926521	0.433149	1.34599	0.288464	not_expressed
Dictyota dichotoma	prot_D-dichotoma_M_contig2617.9020.1	1.37495	0.676062	0.339222	4.02721	1.71362	4.08813	2.00714	unbiased
Dictyota dichotoma	prot_D-dichotoma_M_contig2619.9028.1	-0.39365	0.253704	0.523607	8.6469	12.0133	3.3037	4.51914	unbiased
Dictyota dichotoma	prot_D-dichotoma_M_contig2619.9029.1	0.0381534	0.879214	0.993594	0.44208	0.457258	0.347484	0.456527	not_expressed
Dictyota dichotoma	prot_D-dichotoma_M_contig100.99.1	-0.0333726	0.149886	0.96223	4.12384	4.50803	0.724199	1.27881	unbiased
Dictyota dichotoma	prot_D-dichotoma_M_contig101.158.1	6.47871	2.1475	0.0775037	3.39776	0	6.82022	0	unbiased
Dictyota dichotoma	prot_D-dichotoma_M_contig101.159.1	0.496886	2.0977		0.118017	0.0940861	0.161966	0.210383	not_expressed
Dictyota dichotoma	prot_D-dichotoma_M_contig101.167.1	5.90038	1.92362	0.0705051	0.360742	0	0.687355	0	not_expressed
Dictyota dichotoma	prot_D-dichotoma_M_contig101.169.1	2.74088	1.10534	0.186539	0.433294	0.0693387	0.533799	0.0811933	not_expressed
Dictyota dichotoma	prot_D-dichotoma_M_contig101.170.1	0.296518	0.614614	0.895596	0.617653	0.534284	0.540186	0.175503	not_expressed
Dictyota dichotoma	prot_D-dichotoma_M_contig695.17825.1	-0.276321	0.214369	0.622548	11.0248	14.0025	1.8554	4.7477	unbiased
Dictyota dichotoma	prot_D-dichotoma_M_contig695.17828.1	-0.0203849	0.189162	0.984041	69.6756	74.3203	10.5114	22.0631	unbiased
Dictyota dichotoma	prot_D-dichotoma_M_contig696.17831.1	-0.292548	0.255224	0.675656	11.0817	14.0622	2.99517	3.75474	unbiased
Dictyota dichotoma	prot_D-dichotoma_M_contig696.17833.1	-0.546083	0.460399	0.65973	2.34921	3.6467	1.05501	2.2178	unbiased
Dictyota dichotoma	prot_D-dichotoma_M_contig697.17835.1	0.567651	0.238297	0.216782	7.93565	5.64664	2.33446	1.12284	unbiased
Dictyota dichotoma	prot_D-dichotoma_M_contig697.17836.1	0.27495	0.347662	0.797536	3.71984	3.21533	1.63617	1.11436	unbiased
Dictyota dichotoma	prot_D-dichotoma_M_contig697.17838.1	-0.187048	0.375744	0.890706	5.00849	5.95285	2.5958	2.36011	unbiased
Dictyota dichotoma	prot_D-dichotoma_M_contig697.17839.1	0.284565	0.404372	0.827368	5.67666	4.83491	3.43771	1.3878	unbiased
Dictyota dichotoma	prot_D-dichotoma_M_contig698.17848.1	0.0188562	0.465872	0.993594	13.3352	13.4415	9.0443	9.31458	unbiased
Dictyota dichotoma	prot_D-dichotoma_M_contig699.17851.1	-0.203211	0.220043	0.75371	19.5587	24.2037	5.1125	10.5319	unbiased
Dictyota dichotoma	prot_D-dichotoma_M_contig682.17703.1	0.391051	0.471811	0.787549	69.7548	59.4048	42.5528	30.5144	unbiased
Dictyota dichotoma	prot_D-dichotoma_M_contig684.17722.1	-0.153172	0.263103	0.864949	22.2958	26.5963	5.57638	12.0542	unbiased
Dictyota dichotoma	prot_D-dichotoma_M_contig685.17728.1	1.91283	0.649836	0.0884153	4.66439	1.35353	3.14299	1.1059	unbiased
Dictyota dichotoma	prot_D-dichotoma_M_contig685.17732.1	0.0931059	0.532296	0.97154	12.9294	13.0872	9.02245	6.41083	unbiased
Dictyota dichotoma	prot_D-dichotoma_M_contig686.17737.1	-0.544194	0.295908	0.412395	12.5414	20.1245	3.96158	10.3855	unbiased
Dictyota dichotoma	prot_D-dichotoma_M_contig686.17738.1	-0.373569	0.381922	0.736163	22.1422	30.6285	10.6105	17.5309	unbiased
Dictyota dichotoma	prot_D-dichotoma_M_contig686.17741.1				0	0	0	0	not_expressed
Dictyota dichotoma	prot_D-dichotoma_M_contig3165.10933.1	0.549367	3.25801		0.0271195	0	0.0857593	0	not_expressed
Dictyota dichotoma	prot_D-dichotoma_M_contig3172.10949.1	-0.238411	0.269428	0.766777	9.48582	11.6652	2.69611	4.78968	unbiased
Dictyota dichotoma	prot_D-dichotoma_M_contig3172.10950.1	0.490356	0.667135	0.815876	7.11239	5.16722	7.30096	3.43727	unbiased
Dictyota dichotoma	prot_D-dichotoma_M_contig3172.10951.1	0.830118	0.847802	0.736027	0.657825	0.387508	0.519175	0.301985	not_expressed
Dictyota dichotoma	prot_D-dichotoma_M_contig3172.10952.1	0.355364	0.399722	0.765741	26.4653	21.3428	17.9619	8.05837	unbiased
Dictyota dichotoma	prot_D-dichotoma_M_contig3064.10609.1	-1.02885	1.95936	0.883485	19.5533	42.2414	35.7032	53.7141	unbiased
Dictyota dichotoma	prot_D-dichotoma_M_contig3071.10625.1	2.66471	2.08336		0.123417	0	0.125262	0	not_expressed
Dictyota dichotoma	prot_D-dichotoma_M_contig3072.10627.1	1.35239	1.13306	0.656304	12.3841	4.9721	13.7256	3.90416	unbiased
Dictyota dichotoma	prot_D-dichotoma_M_contig108.688.1	-0.0569151	0.526749	0.984041	31.2726	32.1619	17.7008	35.2548	unbiased
Dictyota dichotoma	prot_D-dichotoma_M_contig108.694.1	0.608799	0.554722	0.692498	0.929973	0.639455	0.80849	0.376299	not_expressed
Dictyota dichotoma	prot_D-dichotoma_M_contig109.773.1	-0.101328	0.261982	0.921301	2.69817	3.10691	0.682872	1.07403	unbiased
Dictyota dichotoma	prot_D-dichotoma_M_contig109.781.1	-1.64842	3.22327		0	0.0811263	0	0.181404	not_expressed
Dictyota dichotoma	prot_D-dichotoma_M_contig2872.9915.1	-0.240607	1.20464	0.96657	0.194905	0.237193	0.194328	0.391009	not_expressed
Dictyota dichotoma	prot_D-dichotoma_M_contig2872.9916.1	2.06515	2.85675		0.135828	0.0219295	0.261776	0.0490359	not_expressed
Dictyota dichotoma	prot_D-dichotoma_M_contig2875.9919.1	-0.128618	0.283166	0.902834	18.3998	20.6236	7.93082	5.70778	unbiased
Dictyota dichotoma	prot_D-dichotoma_M_contig2875.9920.1	1.18572	0.547929	0.290675	1.56265	0.715339	0.916552	0.606792	unbiased
Dictyota dichotoma	prot_D-dichotoma_M_contig2876.9925.1	2.7281	0.94099	0.096278	3.26512	0.470376	5.24954	0.448221	unbiased
Dictyota dichotoma	prot_D-dichotoma_M_contig2881.9945.1	0.385539	0.394699	0.736335	4.97417	3.95279	2.4007	1.34707	unbiased
Dictyota dichotoma	prot_D-dichotoma_M_contig2881.9948.1	-0.186836	0.233692	0.796488	14.1308	17.412	3.4817	7.60661	unbiased
Dictyota dichotoma	prot_D-dichotoma_M_contig2881.9950.1	-0.905314	0.502669	0.425651	0.900576	1.78216	0.661179	0.820697	unbiased
Dictyota dichotoma	prot_D-dichotoma_M_contig2881.9951.1	-0.763684	0.429451	0.435213	1.74169	3.12118	0.905511	1.91161	unbiased
Dictyota dichotoma	prot_D-dichotoma_M_contig4386.14046.1	0.528437	0.876856	0.857126	4.62371	3.33957	4.66162	0.660905	unbiased
Dictyota dichotoma	prot_D-dichotoma_M_contig4386.14047.1	-0.710026	0.527702	0.600354	5.21934	9.20383	3.26074	4.56611	unbiased
Dictyota dichotoma	prot_D-dichotoma_M_contig4398.14060.1	7.8273e-05	0.30474	0.999944	17.2801	18.1729	4.60285	7.6831	unbiased
Dictyota dichotoma	prot_D-dichotoma_M_contig4398.14061.1	0.30139	0.333959	0.76114	21.3114	18.1481	6.46738	9.30862	unbiased
Dictyota dichotoma	prot_D-dichotoma_M_contig4400.14090.1	-0.361259	1.1755	0.941209	9.36738	12.5829	13.0787	21.8922	unbiased
Dictyota dichotoma	prot_D-dichotoma_M_contig599.16844.1	0.337192	0.414875	0.791856	13.5631	11.8878	7.479	5.07748	unbiased
Dictyota dichotoma	prot_D-dichotoma_M_contig599.16846.1	0.233896	0.307402	0.806769	14.5303	13.1419	5.79186	3.89048	unbiased
Dictyota dichotoma	prot_D-dichotoma_M_contig601.16889.1				0	0	0	0	not_expressed
Dictyota dichotoma	prot_D-dichotoma_M_contig601.16901.1	-0.548849	1.40364	0.920161	0.147373	0.252191	0.177557	0.329616	not_expressed
Dictyota dichotoma	prot_D-dichotoma_M_contig848.19274.1	-0.266121	0.379411	0.82745	14.6581	18.5753	5.34727	10.8398	unbiased
Dictyota dichotoma	prot_D-dichotoma_M_contig851.19306.1	0.0663477	0.242554	0.948563	11.8159	12.2543	2.80944	5.50476	unbiased
Dictyota dichotoma	prot_D-dichotoma_M_contig851.19307.1	0.280153	0.269296	0.71282	20.1907	18.1431	5.76081	7.96194	unbiased
Dictyota dichotoma	prot_D-dichotoma_M_contig317.10938.1	-0.284052	0.426652	0.838738	13.6133	17.2246	7.23431	5.72363	unbiased
Dictyota dichotoma	prot_D-dichotoma_M_contig318.10970.1	0.00505124	0.22573	0.99652	8.27606	8.75349	2.7158	3.11259	unbiased
Dictyota dichotoma	prot_D-dichotoma_M_contig318.10971.1	-0.615853	0.497523	0.642005	26.907	41.3516	17.4191	32.6064	unbiased
Dictyota dichotoma	prot_D-dichotoma_M_contig318.10972.1	-0.0322467	0.173289	0.96972	15.0024	16.0911	3.61318	3.5135	unbiased
Dictyota dichotoma	prot_D-dichotoma_M_contig320.11060.1	-0.322969	0.252555	0.626584	12.5536	16.6902	3.65055	7.66388	unbiased
Dictyota dichotoma	prot_D-dichotoma_M_contig320.11065.1	0.493849	0.303916	0.497669	39.6444	30.5978	11.982	10.3233	unbiased
Dictyota dichotoma	prot_D-dichotoma_M_contig81.18938.1	-0.577201	0.363236	0.510479	35.6695	55.468	11.6669	32.7876	unbiased
Dictyota dichotoma	prot_D-dichotoma_M_contig81.18939.1	-0.181244	0.336408	0.878664	11.5681	13.82	5.1377	2.42067	unbiased
Dictyota dichotoma	prot_D-dichotoma_M_contig81.18941.1	0.975263	0.471746	0.328569	10.5277	5.63387	6.32843	2.73276	unbiased
Dictyota dichotoma	prot_D-dichotoma_M_contig81.18946.1	-0.59763	0.339402	0.442612	27.7427	43.9596	15.7275	20.6426	unbiased
Dictyota dichotoma	prot_D-dichotoma_M_contig82.19016.1	0.423948	0.934697	0.902923	0.265497	0.224816	0.202306	0.29951	not_expressed
Dictyota dichotoma	prot_D-dichotoma_M_contig82.19024.1	-0.0836593	0.460573	0.970209	3.34027	3.66019	1.59964	2.73647	unbiased
Dictyota dichotoma	prot_D-dichotoma_M_contig2226.7434.1	0.303762	0.802269	0.922729	0.959468	0.784027	1.47714	0.52462	not_expressed
Dictyota dichotoma	prot_D-dichotoma_M_contig2227.7439.1	1.8881	0.50003	0.0123383	28.0745	7.63688	24.5996	3.52775	GA_biased
Dictyota dichotoma	prot_D-dichotoma_M_contig2229.7449.1	-0.228875	0.461423	0.891112	1.41276	1.76345	0.735545	0.830908	unbiased
Dictyota dichotoma	prot_D-dichotoma_M_contig2231.7461.1	-0.623476	1.18984	0.883808	25.1463	41.5103	36.9761	67.0917	unbiased
Dictyota dichotoma	prot_D-dichotoma_M_contig252.8676.1	-0.121037	0.463897	0.951306	45.105	49.933	32.0807	26.8581	unbiased
Dictyota dichotoma	prot_D-dichotoma_M_contig252.8678.1	-0.0456646	0.175918	0.951445	4.60639	5.04081	0.764658	0.964998	unbiased
Dictyota dichotoma	prot_D-dichotoma_M_contig252.8679.1	0.19848	0.253509	0.800244	3.13063	2.90866	0.867989	0.902643	unbiased
Dictyota dichotoma	prot_D-dichotoma_M_contig253.8711.1	0.888065	1.40895	0.848584	0.418088	0.226831	0.569819	0.344135	not_expressed
Dictyota dichotoma	prot_D-dichotoma_M_contig254.8732.1	2.487	1.43415	0.450822	0.304989	0.0579574	0.222024	0.129597	not_expressed
Dictyota dichotoma	prot_D-dichotoma_M_contig254.8737.1	0.132272	0.198683	0.838738	37.4046	36.3681	5.2705	9.06592	unbiased
Dictyota dichotoma	prot_D-dichotoma_M_contig1118.995.1	0.0313673	0.439679	0.990321	2.44129	2.46972	1.25291	1.11615	unbiased
Dictyota dichotoma	prot_D-dichotoma_M_contig1118.999.1	0.518332	0.663683	0.800504	3.91055	2.76764	4.01645	1.09525	unbiased
Dictyota dichotoma	prot_D-dichotoma_M_contig1119.1004.1	1.02314	0.498081	0.332715	9.86437	5.17305	5.6859	3.54808	unbiased
Dictyota dichotoma	prot_D-dichotoma_M_contig1119.1013.1	-0.660665	0.343739	0.381373	16.8115	28.4934	7.98306	12.6785	unbiased
Dictyota dichotoma	prot_D-dichotoma_M_contig1120.1037.1	-0.201465	0.182598	0.690881	9.96942	12.2064	2.15461	4.52402	unbiased
Dictyota dichotoma	prot_D-dichotoma_M_contig1121.1043.1	1.35614	2.6047		0.0640622	0.0218154	0.0869694	0.0487808	not_expressed
Dictyota dichotoma	prot_D-dichotoma_M_contig1121.1044.1				0	0	0	0	not_expressed
Dictyota dichotoma	prot_D-dichotoma_M_contig3445.11705.1	-0.760824	1.86599		0.0624999	0.118744	0.0856832	0.118114	not_expressed
Dictyota dichotoma	prot_D-dichotoma_M_contig3446.11707.1	0.19774	0.577569	0.93282	2.80328	2.56755	1.80718	1.37907	unbiased
Dictyota dichotoma	prot_D-dichotoma_M_contig3449.11712.1	-0.130835	0.190828	0.831963	19.072	22.6596	3.01702	6.14523	unbiased
Dictyota dichotoma	prot_D-dichotoma_M_contig3450.11738.1	2.5476	0.812808	0.0609514	0.908534	0.162688	0.693591	0.175634	not_expressed
Dictyota dichotoma	prot_D-dichotoma_M_contig3450.11739.1	1.90003	0.981558	0.376267	1.18439	0.338468	1.05082	0.32725	unbiased
Dictyota dichotoma	prot_D-dichotoma_M_contig3455.11743.1	-2.50306	0.596009	0.00331304	38.9579	232.494	38.6307	236.21	SP_biased
Dictyota dichotoma	prot_D-dichotoma_M_contig1322.2487.1	1.09658	1.25487	0.770687	0.777659	0.374325	1.00725	0.376587	not_expressed
Dictyota dichotoma	prot_D-dichotoma_M_contig1323.2492.1	-0.0579647	0.424668	0.97937	3.9778	4.26405	2.05161	2.07725	unbiased
Dictyota dichotoma	prot_D-dichotoma_M_contig1323.2495.1	1.12902	3.25789		0.0455695	0	0.0997287	0	not_expressed
Dictyota dichotoma	prot_D-dichotoma_M_contig1324.2497.1	-0.390307	0.175383	0.268084	15.9929	21.8174	3.11119	5.30771	unbiased
Dictyota dichotoma	prot_D-dichotoma_M_contig1325.2503.1	2.23907	1.03575	0.291158	2.57966	0.560678	2.12731	0.567001	unbiased
Dictyota dichotoma	prot_D-dichotoma_M_contig1.8.1	-0.534835	0.235102	0.24845	18.8266	28.8424	5.47533	10.4659	unbiased
Dictyota dichotoma	prot_D-dichotoma_M_contig1.19.1	0.155107	0.291484	0.881016	256.648	240.781	94.9388	109.894	unbiased
Dictyota dichotoma	prot_D-dichotoma_M_contig1.21.1	-0.195341	0.31274	0.850257	12.3573	14.6015	5.71501	3.81811	unbiased
Dictyota dichotoma	prot_D-dichotoma_M_contig1.27.1	-0.213118	0.38673	0.875347	14.4522	17.3577	9.56285	7.23145	unbiased
Dictyota dichotoma	prot_D-dichotoma_M_contig888.19650.1	0.549367	3.25801		0.0116085	0	0.0367093	0	not_expressed
Dictyota dichotoma	prot_D-dichotoma_M_contig890.19670.1	0.144135	0.208035	0.828741	15.3575	14.8372	4.08761	4.01022	unbiased
Dictyota dichotoma	prot_D-dichotoma_M_contig890.19671.1	-0.15678	0.23451	0.838738	20.1945	23.3689	8.01495	3.75094	unbiased
Dictyota dichotoma	prot_D-dichotoma_M_contig891.19677.1	3.11521	1.51722	0.332715	0.47441	0.0577344	0.987226	0.0799228	not_expressed
Dictyota dichotoma	prot_D-dichotoma_M_contig545.16082.1	-0.316236	3.25801		0	0.0225764	0	0.0504825	not_expressed
Dictyota dichotoma	prot_D-dichotoma_M_contig546.16088.1	2.01605	0.790434	0.168286	1.74224	0.469628	2.45149	0.402473	unbiased
Dictyota dichotoma	prot_D-dichotoma_M_contig546.16089.1	0.59304	0.676426	0.769548	1.57253	1.06208	1.87319	0.528434	unbiased
Dictyota dichotoma	prot_D-dichotoma_M_contig546.16090.1	-1.48652	3.23442		0	0.0580899	0	0.129893	not_expressed
Dictyota dichotoma	prot_D-dichotoma_M_contig547.16106.1	-0.381311	0.359129	0.705844	2.52851	3.40175	1.25607	0.952889	unbiased
Dictyota dichotoma	prot_D-dichotoma_M_contig547.16107.1	-0.285592	0.36207	0.797965	2.20219	2.74431	1.01354	0.499569	unbiased
Dictyota dichotoma	prot_D-dichotoma_M_contig2315.7841.1	-1.07254	0.463976	0.236059	3.58087	8.01955	1.8806	5.91956	unbiased
Dictyota dichotoma	prot_D-dichotoma_M_contig2316.7844.1	1.12431	3.25791		0.0332321	0	0.055835	0	not_expressed
Dictyota dichotoma	prot_D-dichotoma_M_contig2317.7851.1	0.971747	0.775075	0.637761	3.26032	1.63518	2.98641	2.09526	unbiased
Dictyota dichotoma	prot_D-dichotoma_M_contig2318.7855.1	-0.118798	0.167927	0.826138	36.0725	41.8023	9.21449	12.9543	unbiased
Dictyota dichotoma	prot_D-dichotoma_M_contig3997.13098.1				0	0	0	0	not_expressed
Dictyota dichotoma	prot_D-dichotoma_M_contig4000.13175.1	1.69455	0.645153	0.150813	1.19551	0.405361	0.902082	0.133583	unbiased
Dictyota dichotoma	prot_D-dichotoma_M_contig4005.13182.1	-0.416585	0.399866	0.712757	9.83489	13.5344	6.31246	5.48784	unbiased
Dictyota dichotoma	prot_D-dichotoma_M_contig4016.13202.1	-0.101803	0.211424	0.895596	9.78177	10.8823	3.03256	1.65708	unbiased
Dictyota dichotoma	prot_D-dichotoma_M_contig4020.13224.1	3.02167	0.858669	0.025434	0.639326	0.0830409	0.544682	0.117564	not_expressed
Dictyota dichotoma	prot_D-dichotoma_M_contig1689.4698.1	-0.261503	0.383479	0.833435	5.80198	7.32606	3.10098	3.05897	unbiased
Dictyota dichotoma	prot_D-dichotoma_M_contig1689.4700.1	-0.0334819	0.263559	0.980627	18.3299	20.1652	6.84567	7.32949	unbiased
Dictyota dichotoma	prot_D-dichotoma_M_contig1691.4717.1	0.20541	0.38932	0.882362	9.29452	8.44972	4.62006	2.86896	unbiased
Dictyota dichotoma	prot_D-dichotoma_M_contig1691.4718.1	0.225066	1.60802	0.97885	2.40647	2.38681	3.27561	3.19755	unbiased
Dictyota dichotoma	prot_D-dichotoma_M_contig1694.4725.1	-0.865986	2.5289		0.0499002	0.125092	0.071879	0.279714	not_expressed
Dictyota dichotoma	prot_D-dichotoma_M_contig1694.4728.1	-1.41503	0.561729	0.177411	1.2724	3.65456	0.889384	1.6117	unbiased
Dictyota dichotoma	prot_D-dichotoma_M_contig1695.4738.1	0.038592	1.26028	0.99541	2.74847	2.91267	4.09514	4.84493	unbiased
Dictyota dichotoma	prot_D-dichotoma_M_contig898.19725.1	-0.78013	0.279276	0.115562	3.98537	7.18782	1.8324	2.43561	unbiased
Dictyota dichotoma	prot_D-dichotoma_M_contig899.19738.1	0.837903	3.25801		0.0398752	0	0.0843202	0	not_expressed
Dictyota dichotoma	prot_D-dichotoma_M_contig901.19782.1	-4.00225	0.789437	0.000137355	0.361126	6.1761	0.260067	6.75196	SP_specific
Dictyota dichotoma	prot_D-dichotoma_M_contig2603.8990.1	-0.113758	0.238554	0.896964	72.5294	82.1143	9.01001	34.7557	unbiased
Dictyota dichotoma	prot_D-dichotoma_M_contig2603.8991.1	-0.247538	0.234013	0.706715	4.8029	5.99474	1.41422	1.86037	unbiased
Dictyota dichotoma	prot_D-dichotoma_M_contig30.10414.1	-0.394422	0.385643	0.718995	5.22183	7.01607	2.82655	2.26728	unbiased
Dictyota dichotoma	prot_D-dichotoma_M_contig31.10718.1	0.172724	0.198394	0.771692	12.3789	11.6346	2.92117	4.00783	unbiased
Dictyota dichotoma	prot_D-dichotoma_M_contig31.10719.1	-0.433658	0.251386	0.454596	6.78577	9.74724	2.15015	4.24524	unbiased
Dictyota dichotoma	prot_D-dichotoma_M_contig31.10721.1	-0.507836	0.311255	0.494411	8.48182	12.7102	3.16987	5.0857	unbiased
Dictyota dichotoma	prot_D-dichotoma_M_contig736.18213.1	-0.298392	0.18494	0.502395	15.9511	20.9929	3.86523	8.06866	unbiased
Dictyota dichotoma	prot_D-dichotoma_M_contig737.18219.1	1.64525	3.25244		0.0708212	0	0.125647	0	not_expressed
Dictyota dichotoma	prot_D-dichotoma_M_contig738.18227.1	0.017858	0.266504	0.990832	25.7776	27.6522	5.74245	15.0975	unbiased
Dictyota dichotoma	prot_D-dichotoma_M_contig738.18228.1	-0.385334	0.202167	0.386611	14.4564	19.8508	4.14914	5.63289	unbiased
Dictyota dichotoma	prot_D-dichotoma_M_contig739.18231.1	0.20015	0.603238	0.935175	1.08517	1.0505	0.865791	0.75666	unbiased
Dictyota dichotoma	prot_D-dichotoma_M_contig739.18237.1	-0.00927532	0.365853	0.996396	14.6938	15.2187	4.25021	8.8036	unbiased
Dictyota dichotoma	prot_D-dichotoma_M_contig1616.4301.1	0.0143928	0.184881	0.98965	17.3394	18.1175	2.61736	3.741	unbiased
Dictyota dichotoma	prot_D-dichotoma_M_contig1617.4310.1	-0.347246	0.225375	0.527592	15.5164	21.1089	4.97035	8.62285	unbiased
Dictyota dichotoma	prot_D-dichotoma_M_contig1618.4322.1	1.06369	1.382	0.802886	0.227199	0.116622	0.209122	0.11849	not_expressed
Dictyota dichotoma	prot_D-dichotoma_M_contig1619.4328.1	-0.03925	0.232379	0.971942	75.5661	81.4117	5.91406	33.8887	unbiased
Dictyota dichotoma	prot_D-dichotoma_M_contig1621.4357.1	-0.130448	1.4253	0.985976	0.218822	0.247827	0.244	0.299144	not_expressed
Dictyota dichotoma	prot_D-dichotoma_M_contig1621.4358.1	-0.0277005	3.25801		0.0117738	0.0234582	0.0372319	0.0524542	not_expressed
Dictyota dichotoma	prot_D-dichotoma_M_contig1980.6160.1	-0.41393	0.403322	0.71764	2.26741	3.17548	1.24891	1.77744	unbiased
Dictyota dichotoma	prot_D-dichotoma_M_contig1982.6173.1	-0.995491	0.741223	0.602013	1.09814	2.17163	1.08105	0.975079	unbiased
Dictyota dichotoma	prot_D-dichotoma_M_contig1987.6185.1	0	0		0.578965	0	1.83085	0	not_expressed
Dictyota dichotoma	prot_D-dichotoma_M_contig1987.6186.1	0.818353	0.477797	0.46116	1.85354	1.05604	1.19251	0.524286	unbiased
Dictyota dichotoma	prot_D-dichotoma_M_contig1988.6189.1	1.39013	2.61291		0.109358	0.0327621	0.159186	0.0732583	not_expressed
Dictyota dichotoma	prot_D-dichotoma_M_contig3501.11885.1	-0.287761	0.465728	0.85238	2.38118	3.22562	1.5163	2.85715	unbiased
Dictyota dichotoma	prot_D-dichotoma_M_contig3501.11886.1	0.13463	0.733438	0.970136	1.15657	1.09851	1.43002	0.660377	unbiased
Dictyota dichotoma	prot_D-dichotoma_M_contig3501.11887.1	1.27467	1.25	0.720302	0.286485	0.11395	0.282713	0.184806	not_expressed
Dictyota dichotoma	prot_D-dichotoma_M_contig3502.11889.1	-0.208658	0.438908	0.897474	32.6457	41.9539	17.5301	22.9888	unbiased
Dictyota dichotoma	prot_D-dichotoma_M_contig3506.11895.1	-0.433885	0.385158	0.683496	15.8567	23.6849	5.74126	14.3692	unbiased
Dictyota dichotoma	prot_D-dichotoma_M_contig1962.6073.1	-0.316236	3.25801		0	0.0483139	0	0.108033	not_expressed
Dictyota dichotoma	prot_D-dichotoma_M_contig1963.6074.1	1.87618	0.611323	0.0704375	2.83411	0.762051	3.15747	0.517339	unbiased
Dictyota dichotoma	prot_D-dichotoma_M_contig1965.6080.1	-0.259605	0.428544	0.8565	6.38853	8.2799	1.9401	6.5152	unbiased
Dictyota dichotoma	prot_D-dichotoma_M_contig1966.6081.1	0.837903	3.25801		0.0319564	0	0.0684481	0	not_expressed
Dictyota dichotoma	prot_D-dichotoma_M_contig1968.6091.1	-0.226044	0.361075	0.849909	16.1586	19.5377	7.72466	11.3295	unbiased
Dictyota dichotoma	prot_D-dichotoma_M_contig1968.6093.1	0.681649	0.484675	0.579843	3.15345	2.06029	1.91216	1.00213	unbiased
Dictyota dichotoma	prot_D-dichotoma_M_contig2.6242.1	0.459228	0.467265	0.734358	2.43749	1.88089	1.84219	0.723271	unbiased
Dictyota dichotoma	prot_D-dichotoma_M_contig2.6246.1	0.85475	0.451053	0.390141	414.735	251.76	211.915	141.189	unbiased
Dictyota dichotoma	prot_D-dichotoma_M_contig2.6264.1	0.0701461	0.16812	0.912068	11.4245	11.4873	2.91435	2.14377	unbiased
Dictyota dichotoma	prot_D-dichotoma_M_contig2.6265.1	-0.809321	0.532829	0.536111	2.41748	4.53535	1.56271	3.77224	unbiased
Dictyota dichotoma	prot_D-dichotoma_M_contig2.6266.1	-0.581221	0.424717	0.59248	2.16373	3.35396	1.36918	1.37336	unbiased
Dictyota dichotoma	prot_D-dichotoma_M_contig2.6271.1	0.370433	0.481437	0.803077	7.27189	5.73582	5.53804	1.6904	unbiased
Dictyota dichotoma	prot_D-dichotoma_M_contig2.6272.1	-0.554887	0.867049	0.846974	1.47028	2.11251	1.05925	2.63742	unbiased
Dictyota dichotoma	prot_D-dichotoma_M_contig2582.8895.1	0.445295	1.06525	0.912068	0.417796	0.32577	0.391231	0.31259	not_expressed
Dictyota dichotoma	prot_D-dichotoma_M_contig2586.8901.1	0.281464	3.12152		0.0546423	0.0469164	0.0955989	0.104908	not_expressed
Dictyota dichotoma	prot_D-dichotoma_M_contig2593.8931.1	0.576904	0.20508	0.112055	2.86005	2.03722	0.772234	0.569685	unbiased
Dictyota dichotoma	prot_D-dichotoma_M_contig2593.8932.1	0.863042	0.282115	0.0714649	3.72222	2.18601	1.35338	0.867663	unbiased
Dictyota dichotoma	prot_D-dichotoma_M_contig2593.8933.1	0.598754	0.346596	0.454024	1.49136	1.04711	0.720963	0.413488	unbiased
Dictyota dichotoma	prot_D-dichotoma_M_contig3893.12858.1	0.072634	0.361819	0.966429	149.473	153.838	59.4213	90.607	unbiased
Dictyota dichotoma	prot_D-dichotoma_M_contig3899.12865.1	1.93586	2.08051	0.75162	0.23922	0.0619952	0.354186	0.0849529	not_expressed
Dictyota dichotoma	prot_D-dichotoma_M_contig3900.12906.1	-0.316236	3.25801		0	0.0318291	0	0.071172	not_expressed
Dictyota dichotoma	prot_D-dichotoma_M_contig3901.12910.1	-0.280582	0.912951	0.941209	0.310898	0.412422	0.310481	0.205759	not_expressed
Dictyota dichotoma	prot_D-dichotoma_M_contig3901.12913.1	-2.05377	0.77879	0.149461	0.396883	1.78121	0.356652	0.962359	unbiased
Dictyota dichotoma	prot_D-dichotoma_M_contig3903.12918.1	-0.512175	0.559123	0.756651	1.82173	2.72579	1.18728	1.36979	unbiased
Dictyota dichotoma	prot_D-dichotoma_M_contig3903.12919.1	-0.698522	0.360368	0.375886	3.00748	5.14503	1.41173	2.05108	unbiased
Dictyota dichotoma	prot_D-dichotoma_M_contig3911.12934.1	-0.0504075	0.464105	0.984041	2767.59	2969.05	1758.81	1173.45	unbiased
Dictyota dichotoma	prot_D-dichotoma_M_contig3912.12937.1	1.53188	0.704443	0.28715	2.90656	1.11388	3.38827	0.230989	unbiased
Dictyota dichotoma	prot_D-dichotoma_M_contig327.11233.1	-0.289233	0.557238	0.885598	25.2412	33.0507	17.0234	32.8369	unbiased
Dictyota dichotoma	prot_D-dichotoma_M_contig327.11235.1	-0.0519353	0.267768	0.967695	1.4045	1.54319	0.538733	0.476749	unbiased
Dictyota dichotoma	prot_D-dichotoma_M_contig327.11237.1	0.0963736	1.04874	0.98594	0.19835	0.192993	0.208428	0.162274	not_expressed
Dictyota dichotoma	prot_D-dichotoma_M_contig327.11241.1	2.43408	1.31296	0.406173	5.37094	1.11926	9.82464	1.53183	unbiased
Dictyota dichotoma	prot_D-dichotoma_M_contig327.11242.1	0.736888	0.490378	0.541785	26.1144	17.2294	18.8795	5.2271	unbiased
Dictyota dichotoma	prot_D-dichotoma_M_contig328.11279.1	-0.00688808	0.732431	0.998747	2.79918	2.87043	2.89825	2.20466	unbiased
Dictyota dichotoma	prot_D-dichotoma_M_contig32.11034.1	2.22046	3.2387		0.0999953	0	0.243779	0	not_expressed
Dictyota dichotoma	prot_D-dichotoma_M_contig32.11039.1	0.00413693	0.339473	0.998304	42.8221	45.8473	16.1069	18.2423	unbiased
Dictyota dichotoma	prot_D-dichotoma_M_contig32.11040.1	0.0228497	0.48037	0.993351	48.1194	52.1987	30.4165	26.6744	unbiased
Dictyota dichotoma	prot_D-dichotoma_M_contig1496.3545.1	0.101786	0.601936	0.971942	1.94562	1.88562	1.4285	0.885129	unbiased
Dictyota dichotoma	prot_D-dichotoma_M_contig1497.3552.1	0.475849	1.0106	0.898553	0.94486	0.671906	0.845232	0.812998	not_expressed
Dictyota dichotoma	prot_D-dichotoma_M_contig1498.3556.1	-0.447514	0.440628	0.721584	1.86828	2.64953	1.20775	1.26043	unbiased
Dictyota dichotoma	prot_D-dichotoma_M_contig1498.3557.1	-0.344705	0.352595	0.736163	4.32579	5.70723	2.23412	2.39117	unbiased
Dictyota dichotoma	prot_D-dichotoma_M_contig1499.3563.1	2.72026	1.24341	0.281769	1.09719	0.181151	1.46082	0.220372	unbiased
Dictyota dichotoma	prot_D-dichotoma_M_contig496.15186.1	-0.591421	0.418588	0.577522	2.65579	4.10245	1.57948	2.13112	unbiased
Dictyota dichotoma	prot_D-dichotoma_M_contig496.15191.1	-0.146715	0.141658	0.714088	26.4638	30.7983	5.26751	7.16087	unbiased
Dictyota dichotoma	prot_D-dichotoma_M_contig497.15203.1	-2.93698	1.42823	0.332704	0.141917	1.37799	0.250603	2.48796	unbiased
Dictyota dichotoma	prot_D-dichotoma_M_contig498.15211.1	0.281621	0.308584	0.757885	38.1331	33.7404	10.9744	15.0978	unbiased
Dictyota dichotoma	prot_D-dichotoma_M_contig498.15212.1	-0.568967	0.490384	0.670428	28.8025	45.5975	19.8656	24.2957	unbiased
Dictyota dichotoma	prot_D-dichotoma_M_contig498.15215.1	-0.204018	0.548388	0.924414	1.86057	2.28494	1.39751	0.511975	unbiased
Dictyota dichotoma	prot_D-dichotoma_M_contig2828.9775.1	0.548926	0.349929	0.519528	182.53	130.723	95.7493	39.8674	unbiased
Dictyota dichotoma	prot_D-dichotoma_M_contig2828.9776.1	0.549367	3.25801		0.0119416	0	0.0377628	0	not_expressed
Dictyota dichotoma	prot_D-dichotoma_M_contig2829.9779.1	-1.04869	1.24583	0.781708	1.16475	2.64573	1.32927	3.46293	unbiased
Dictyota dichotoma	prot_D-dichotoma_M_contig2833.9791.1	0.033945	0.584991	0.992073	1.00354	1.03907	0.311964	0.72342	unbiased
Dictyota dichotoma	prot_D-dichotoma_M_contig2833.9793.1	-0.248525	0.233378	0.705375	16.3336	20.7551	3.41194	7.09708	unbiased
Dictyota dichotoma	prot_D-dichotoma_M_contig2834.9795.1	-0.188207	0.588381	0.937603	1.16036	1.3956	0.7954	1.37527	unbiased
Dictyota dichotoma	prot_D-dichotoma_M_contig2835.9796.1	-0.257016	0.638234	0.917033	11.4194	14.0059	9.51295	16.7616	unbiased
Dictyota dichotoma	prot_D-dichotoma_M_contig907.19809.1	-0.747447	0.57197	0.61479	8.21468	14.1976	5.32498	14.0721	unbiased
Dictyota dichotoma	prot_D-dichotoma_M_contig909.19821.1	0.207152	0.413297	0.890181	21.4404	19.6214	10.1429	10.0373	unbiased
Dictyota dichotoma	prot_D-dichotoma_M_contig910.19850.1	2.34167	1.43967	0.496432	23.2209	4.49207	28.3393	7.28749	unbiased
Dictyota dichotoma	prot_D-dichotoma_M_contig911.19854.1	0.443	0.421562	0.709685	13.578	10.3264	6.96813	4.82183	unbiased
Dictyota dichotoma	prot_D-dichotoma_M_contig911.19855.1	0.635331	0.398623	0.509314	4.7331	3.11659	2.12276	2.23934	unbiased
Dictyota dichotoma	prot_D-dichotoma_M_contig911.19856.1	1.21204	0.830904	0.559456	2.18647	0.96024	1.98593	1.16363	unbiased
Dictyota dichotoma	prot_D-dichotoma_M_contig911.19861.1	-0.290957	0.224376	0.619232	13.6392	17.5795	3.98317	4.77532	unbiased
Dictyota dichotoma	prot_D-dichotoma_M_contig1561.3934.1	-0.316236	3.25801		0	0.0313819	0	0.0701721	not_expressed
Dictyota dichotoma	prot_D-dichotoma_M_contig1562.3937.1	0.341621	0.527174	0.84417	15.0062	11.9547	8.9057	8.71535	unbiased
Dictyota dichotoma	prot_D-dichotoma_M_contig1562.3941.1	0.488253	0.548572	0.765285	3.61119	2.81777	2.63528	1.15823	unbiased
Dictyota dichotoma	prot_D-dichotoma_M_contig1563.3947.1	0.279619	0.239263	0.666724	19.3047	16.9686	4.55225	5.64445	unbiased
Dictyota dichotoma	prot_D-dichotoma_M_contig1564.3951.1	0.706797	0.406825	0.450098	5.94422	3.68011	3.84948	1.39607	unbiased
Dictyota dichotoma	prot_D-dichotoma_M_contig1564.3954.1	0.413317	0.241842	0.462243	7.95641	6.42644	2.18447	2.15784	unbiased
Dictyota dichotoma	prot_D-dichotoma_M_contig124.1897.1	-1.06146	0.414467	0.165934	9.24125	19.8674	4.61431	9.81393	unbiased
Dictyota dichotoma	prot_D-dichotoma_M_contig124.1905.1	-0.241764	0.187119	0.621374	22.3479	27.4612	6.5333	6.63982	unbiased
Dictyota dichotoma	prot_D-dichotoma_M_contig1623.4363.1	0.802869	3.25663		0.0412236	0.021336	0.0725162	0.0477087	not_expressed
Dictyota dichotoma	prot_D-dichotoma_M_contig1625.4367.1	0.837903	3.25801		0.0230053	0	0.0489124	0	not_expressed
Dictyota dichotoma	prot_D-dichotoma_M_contig1626.4373.1	0.659305	0.812585	0.792391	0.298555	0.202396	0.218828	0.116667	not_expressed
Dictyota dichotoma	prot_D-dichotoma_M_contig4861.15002.1	-0.0957438	0.978918	0.9852	2.9945	3.33826	3.98106	3.67136	unbiased
Dictyota dichotoma	prot_D-dichotoma_M_contig4861.15003.1	-0.995419	0.712635	0.584261	32.3921	67.3136	38.9278	72.4583	unbiased
Dictyota dichotoma	prot_D-dichotoma_M_contig4867.15009.1	-0.599622	0.358664	0.477974	5.07851	8.23953	1.99434	1.76476	unbiased
Dictyota dichotoma	prot_D-dichotoma_M_contig4870.15023.1	0.549367	3.25801		0.0139302	0	0.0440512	0	not_expressed
Dictyota dichotoma	prot_D-dichotoma_M_contig4873.15025.1	-0.414611	0.515039	0.7947	0.958158	1.3385	0.665687	1.0661	unbiased
Dictyota dichotoma	prot_D-dichotoma_M_contig4873.15026.1	0.221691	0.663299	0.934888	1.60656	1.43342	1.37531	0.846181	unbiased
Dictyota dichotoma	prot_D-dichotoma_M_contig4880.15035.1	-0.17502	1.91834	0.986055	2.81496	3.4213	4.70297	6.15009	unbiased
Dictyota dichotoma	prot_D-dichotoma_M_contig4880.15036.1	-1.86292	2.24142		0.348159	1.35641	0.658698	2.98124
Dictyota dichotoma	prot_D-dichotoma_M_contig4890.15055.1	-0.73399	0.744993	0.733534	0.946471	1.73071	0.737798	1.68515	unbiased
Dictyota dichotoma	prot_D-dichotoma_M_contig4891.15057.1	1.32283	0.843037	0.519403	1.80328	0.708742	1.31909	1.04562	unbiased
Dictyota dichotoma	prot_D-dichotoma_M_contig4901.15102.1	0.805662	0.458071	0.443039	2.34997	1.45884	1.13583	0.696389	unbiased
Dictyota dichotoma	prot_D-dichotoma_M_contig5754.16553.1	2.51661	2.46911		0.100863	0	0.168562	0	not_expressed
Dictyota dichotoma	prot_D-dichotoma_M_contig5757.16555.1	-0.316236	3.25801		0	0.0319217	0	0.0713791	not_expressed
Dictyota dichotoma	prot_D-dichotoma_M_contig5773.16570.1	0.326334	0.646936	0.888882	1.28053	1.08834	1.13739	0.887986	unbiased
Dictyota dichotoma	prot_D-dichotoma_M_contig5780.16579.1	-0.594546	1.86393	0.937788	0.0907708	0.142501	0.107357	0.259998	not_expressed
Dictyota dichotoma	prot_D-dichotoma_M_contig5793.16591.1	4.56511	1.85583	0.191426	0.797856	0	1.06204	0	not_expressed
Dictyota dichotoma	prot_D-dichotoma_M_contig5805.16649.1	-0.363202	0.738117	0.892302	9.80404	12.9313	9.87344	13.214	unbiased
Dictyota dichotoma	prot_D-dichotoma_M_contig5810.16656.1	-0.402493	0.692465	0.865359	0.992652	1.3772	0.905995	0.95261	unbiased
Dictyota dichotoma	prot_D-dichotoma_M_contig5813.16657.1	0.384021	0.800509	0.895843	8.63818	6.16998	7.29715	9.88579	unbiased
Dictyota dichotoma	prot_D-dichotoma_M_contig5813.16658.1	-0.977219	1.23678	0.797598	16.8393	29.7558	17.6875	62.9902	unbiased
Dictyota dichotoma	prot_D-dichotoma_M_contig74.18248.1	-0.154668	0.305327	0.888271	25.376	30.0326	8.36148	14.6715	unbiased
Dictyota dichotoma	prot_D-dichotoma_M_contig1032.358.1	-0.849706	0.406309	0.32014	1.55548	2.98917	0.766788	1.4872	unbiased
Dictyota dichotoma	prot_D-dichotoma_M_contig1034.378.1	0.376463	1.06521	0.929602	6.09292	5.0024	10.124	5.0798	unbiased
Dictyota dichotoma	prot_D-dichotoma_M_contig1035.385.1	-0.999464	0.607426	0.487704	0.613503	1.267	0.430553	0.681993	unbiased
Dictyota dichotoma	prot_D-dichotoma_M_contig1035.387.1	-0.0277005	3.25801		0.0155668	0.034671	0.0492265	0.0775266	not_expressed
Dictyota dichotoma	prot_D-dichotoma_M_contig1036.392.1	-0.185514	0.199185	0.751512	14.1849	17.1077	3.7957	5.12874	unbiased
Dictyota dichotoma	prot_D-dichotoma_M_contig1734.4954.1	0.215414	0.21848	0.733108	103.598	94.8806	20.599	30.4442	unbiased
Dictyota dichotoma	prot_D-dichotoma_M_contig1734.4959.1	1.61806	1.65096	0.735457	0.942309	0.307013	1.47993	0.686503	not_expressed
Dictyota dichotoma	prot_D-dichotoma_M_contig1734.4960.1	2.84807	1.74961	0.496372	0.725259	0.114993	0.981622	0.157483	not_expressed
Dictyota dichotoma	prot_D-dichotoma_M_contig197.6102.1	-0.299781	0.295757	0.722225	6.86815	8.99756	2.06185	5.24626	unbiased
Dictyota dichotoma	prot_D-dichotoma_M_contig198.6146.1	0.667721	1.41194	0.897752	0.455764	0.293082	0.573781	0.415519	not_expressed
Dictyota dichotoma	prot_D-dichotoma_M_contig198.6147.1	-1.11589	0.975025	0.676012	0.246612	0.537321	0.178178	0.484426	not_expressed
Dictyota dichotoma	prot_D-dichotoma_M_contig2099.6827.1	0.91678	0.479633	0.384621	11.2243	6.25865	6.15221	2.60401	unbiased
Dictyota dichotoma	prot_D-dichotoma_M_contig2101.6876.1	0.184712	1.08392	0.971914	0.625142	0.586431	0.512331	0.787096	not_expressed
Dictyota dichotoma	prot_D-dichotoma_M_contig2102.6880.1				0	0	0	0	not_expressed
Dictyota dichotoma	prot_D-dichotoma_M_contig1516.3672.1	-0.609648	0.287805	0.307569	1.84298	2.96665	0.782769	0.883096	unbiased
Dictyota dichotoma	prot_D-dichotoma_M_contig1517.3677.1	0.881244	3.13006		0.0930183	0.0319217	0.178427	0.0713791	not_expressed
Dictyota dichotoma	prot_D-dichotoma_M_contig1518.3678.1	1.46433	0.835699	0.445575	1.16462	0.472548	0.925779	0.360082	unbiased
Dictyota dichotoma	prot_D-dichotoma_M_contig1519.3686.1	1.63523	0.785884	0.325247	10.368	3.54012	11.0324	4.86682	unbiased
Dictyota dichotoma	prot_D-dichotoma_M_contig1522.3717.1	0.549367	3.25801		0.0237194	0	0.0750075	0	not_expressed
Dictyota dichotoma	prot_D-dichotoma_M_contig213.7012.1	-0.0664087	0.188123	0.929731	28.5223	31.6583	5.9457	10.1536	unbiased
Dictyota dichotoma	prot_D-dichotoma_M_contig213.7017.1	0.0671681	0.264282	0.953208	39.2425	39.29	9.86877	12.7391	unbiased
Dictyota dichotoma	prot_D-dichotoma_M_contig214.7049.1	-0.474992	0.400818	0.660273	2.35581	3.52793	0.991639	2.56326	unbiased
Dictyota dichotoma	prot_D-dichotoma_M_contig214.7050.1	-0.304748	0.349516	0.771197	2.0976	2.72371	0.719826	1.48896	unbiased
Dictyota dichotoma	prot_D-dichotoma_M_contig215.7110.1	1.87159	3.2474		0.0354275	0	0.0755244	0	not_expressed
Dictyota dichotoma	prot_D-dichotoma_M_contig215.7113.1				0	0	0	0	not_expressed
Dictyota dichotoma	prot_D-dichotoma_M_contig1388.2853.1	1.29044	0.960949	0.602018	8.69333	3.56124	9.44674	2.26268	unbiased
Dictyota dichotoma	prot_D-dichotoma_M_contig1388.2859.1	1.22961	1.40845	0.771142	0.364059	0.158961	0.477351	0.152722	not_expressed
Dictyota dichotoma	prot_D-dichotoma_M_contig1389.2862.1	-5.72284	1.55961	0.0166464	0	1.03422	0	1.06026	SP_specific
Dictyota dichotoma	prot_D-dichotoma_M_contig1390.2896.1	2.39706	3.23478		0.122148	0	0.316963	0	not_expressed
Dictyota dichotoma	prot_D-dichotoma_M_contig1390.2897.1	3.50858	1.30081	0.13518	0.552363	0.0549308	0.897474	0.0756131	not_expressed
Dictyota dichotoma	prot_D-dichotoma_M_contig1391.2899.1	0.188948	0.338388	0.873799	8.70392	7.94469	4.04393	1.75765	unbiased
Dictyota dichotoma	prot_D-dichotoma_M_contig1391.2900.1	0.233209	0.387731	0.857576	16.5601	15.3396	6.37155	11.5536	unbiased
Dictyota dichotoma	prot_D-dichotoma_M_contig1391.2901.1	1.71637	1.41505	0.650151	0.26381	0.0883154	0.258855	0.080742	not_expressed
Dictyota dichotoma	prot_D-dichotoma_M_contig1601.4209.1	0.837903	3.25801		0.0281905	0	0.0891461	0	not_expressed
Dictyota dichotoma	prot_D-dichotoma_M_contig1601.4211.1	0.345731	0.205852	0.474529	14.8256	12.5559	2.31087	5.46926	unbiased
Dictyota dichotoma	prot_D-dichotoma_M_contig1602.4218.1	1.33394	0.77985	0.461764	0.749655	0.3136	0.502393	0.27113	not_expressed
Dictyota dichotoma	prot_D-dichotoma_M_contig1605.4229.1	-0.192428	0.258	0.812556	20.2921	23.9459	7.1446	4.24262	unbiased
Dictyota dichotoma	prot_D-dichotoma_M_contig1605.4232.1	0.712093	1.13634	0.849755	0.324705	0.226942	0.299098	0.277516	not_expressed
Dictyota dichotoma	prot_D-dichotoma_M_contig4167.13571.1	-0.398616	0.530786	0.809801	3.51789	4.58836	2.26537	2.69077	unbiased
Dictyota dichotoma	prot_D-dichotoma_M_contig4176.13586.1	-0.0124541	0.218971	0.992332	22.6624	24.4617	4.83833	2.258	unbiased
Dictyota dichotoma	prot_D-dichotoma_M_contig4178.13589.1	0.401065	0.302956	0.608372	4.4208	3.43802	1.41137	1.09868	unbiased
Dictyota dichotoma	prot_D-dichotoma_M_contig4179.13591.1	0.0197983	0.355249	0.992509	2.34742	2.50882	0.876698	1.19339	unbiased
Dictyota dichotoma	prot_D-dichotoma_M_contig4180.13597.1	-0.531732	0.279755	0.388537	203.539	303.772	44.5702	160.73	unbiased
Dictyota dichotoma	prot_D-dichotoma_M_contig4186.13603.1	0.0550817	1.51612	0.994564	6.4347	6.49808	7.43944	1.6586	unbiased
Dictyota dichotoma	prot_D-dichotoma_M_contig4186.13604.1	-0.210299	1.48217	0.978665	5.82029	6.85129	6.99192	1.45257	unbiased
Dictyota dichotoma	prot_D-dichotoma_M_contig4193.13613.1	0.912846	0.723565	0.634153	1.64786	0.850395	1.60805	0.528485	unbiased
Dictyota dichotoma	prot_D-dichotoma_M_contig4193.13614.1	-0.380637	0.904878	0.911656	0.0992924	0.134818	0.0758928	0.10203	not_expressed
Dictyota dichotoma	prot_D-dichotoma_M_contig4193.13616.1	-0.180603	0.662701	0.948817	17.3551	20.0048	14.6707	18.1137	unbiased
Dictyota dichotoma	prot_D-dichotoma_M_contig208.6756.1	2.65803	3.22819		0.197179	0	0.469472	0	not_expressed
Dictyota dichotoma	prot_D-dichotoma_M_contig208.6759.1	-0.122343	0.278454	0.905895	17.1047	19.6549	5.93709	8.04871	unbiased
Dictyota dichotoma	prot_D-dichotoma_M_contig208.6760.1	0.00323916	0.380233	0.998747	17.461	18.5009	8.64836	8.81429	unbiased
Dictyota dichotoma	prot_D-dichotoma_M_contig4598.14492.1	2.16687	0.562093	0.0096772	14.3565	3.36409	10.2171	1.94544	GA_biased
Dictyota dichotoma	prot_D-dichotoma_M_contig4599.14496.1	1.21852	0.659161	0.408005	5.88229	2.49584	6.94539	1.11984	unbiased
Dictyota dichotoma	prot_D-dichotoma_M_contig4599.14497.1	-0.155769	0.320135	0.893876	16.6501	19.4892	6.30002	6.1355	unbiased
Dictyota dichotoma	prot_D-dichotoma_M_contig4601.14518.1	-3.21378	3.15442		0.00870624	0.261467	0.0275315	0.522455	not_expressed
Dictyota dichotoma	prot_D-dichotoma_M_contig4605.14522.1	0.444244	0.62515	0.824721	5.77278	4.29539	4.00378	1.01324	unbiased
Dictyota dichotoma	prot_D-dichotoma_M_contig4607.14525.1	0.0245419	0.532771	0.993351	4.83264	4.75208	5.03761	1.079	unbiased
Dictyota dichotoma	prot_D-dichotoma_M_contig4612.14538.1	-0.177254	1.48781	0.981779	0.144619	0.164911	0.141893	0.167721	not_expressed
Dictyota dichotoma	prot_D-dichotoma_M_contig4614.14543.1	0.0278348	0.534444	0.992885	3.05781	2.9846	2.04517	1.40593	unbiased
Dictyota dichotoma	prot_D-dichotoma_M_contig5232.15724.1	-0.622521	0.659086	0.746925	120.113	198.981	67.3551	136.739	unbiased
Dictyota dichotoma	prot_D-dichotoma_M_contig5232.15725.1	-0.436095	0.638919	0.83306	203.484	298.584	119.671	115.781	unbiased
Dictyota dichotoma	prot_D-dichotoma_M_contig5232.15726.1	-0.803287	0.710035	0.681471	64.5615	118.959	52.4881	94.1635	unbiased
Dictyota dichotoma	prot_D-dichotoma_M_contig5232.15728.1	-0.027738	0.309177	0.986487	68.3117	72.8968	24.6238	32.484	unbiased
Dictyota dichotoma	prot_D-dichotoma_M_contig5249.15745.1	-2.26655	1.65946	0.59319	0.0693957	0.334907	0.0627105	0.691441	not_expressed
Dictyota dichotoma	prot_D-dichotoma_M_contig5250.15752.1	-2.02115	1.44248	0.582072	0.0639025	0.275742	0.10948	0.236146	not_expressed
Dictyota dichotoma	prot_D-dichotoma_M_contig5252.15754.1	2.4142	2.99195		0.062868	0	0.124636	0	not_expressed
Dictyota dichotoma	prot_D-dichotoma_M_contig5255.15755.1				0	0	0	0	not_expressed
Dictyota dichotoma	prot_D-dichotoma_M_contig5264.15764.1	0.537537	0.357108	0.540719	22.0377	15.9262	10.4695	9.2423	unbiased
Dictyota dichotoma	prot_D-dichotoma_M_contig339.11555.1	-0.00963174	0.283417	0.995083	14.5062	15.5836	3.68471	7.98418	unbiased
Dictyota dichotoma	prot_D-dichotoma_M_contig340.11594.1	-0.0851018	0.784916	0.984041	7.81664	8.45976	7.90531	6.99906	unbiased
Dictyota dichotoma	prot_D-dichotoma_M_contig340.11599.1				0	0	0	0	not_expressed
Dictyota dichotoma	prot_D-dichotoma_M_contig340.11600.1	0.549367	3.25801		0.0196275	0	0.0620677	0	not_expressed
Dictyota dichotoma	prot_D-dichotoma_M_contig340.11601.1	1.08698	1.28403	0.779461	4.19889	2.0721	4.72891	1.30991	unbiased
Dictyota dichotoma	prot_D-dichotoma_M_contig341.11627.1	-0.613594	0.666236	0.754704	0.915747	1.37953	0.65481	1.29767	unbiased
Dictyota dichotoma	prot_D-dichotoma_M_contig155.3857.1	-0.072433	0.701934	0.984667	509.334	509.746	645.526	331.46	unbiased
Dictyota dichotoma	prot_D-dichotoma_M_contig155.3867.1	-0.725055	0.302575	0.212532	9.59606	16.7706	3.2181	8.25633	unbiased
Dictyota dichotoma	prot_D-dichotoma_M_contig155.3871.1	-0.372136	0.255304	0.559456	5.99465	8.29941	1.20009	3.5494	unbiased
Dictyota dichotoma	prot_D-dichotoma_M_contig526.15759.1	2.22394	0.887684	0.18042	2.04126	0.446869	1.99602	0.387321	unbiased
Dictyota dichotoma	prot_D-dichotoma_M_contig527.15780.1	-0.0785009	0.29422	0.950425	3.94212	4.29391	1.66704	1.17957	unbiased
Dictyota dichotoma	prot_D-dichotoma_M_contig527.15781.1	0.364146	0.308873	0.661704	6.3466	5.22987	2.14779	2.63855	unbiased
Dictyota dichotoma	prot_D-dichotoma_M_contig527.15782.1	-0.090955	0.346558	0.951166	10.5884	11.534	4.76356	4.21203	unbiased
Dictyota dichotoma	prot_D-dichotoma_M_contig528.15788.1	-0.681981	3.18154		0.0603611	0.134245	0.139925	0.30018	not_expressed
Dictyota dichotoma	prot_D-dichotoma_M_contig1353.2665.1	-0.215703	0.390473	0.875285	2.42555	2.95813	1.38701	1.10622	unbiased
Dictyota dichotoma	prot_D-dichotoma_M_contig1353.2666.1	-0.112455	0.325296	0.93154	2.5846	2.96272	1.00654	1.32799	unbiased
Dictyota dichotoma	prot_D-dichotoma_M_contig1357.2679.1	0.164839	0.190101	0.773637	224.143	210.215	49.9674	27.6684	unbiased
Dictyota dichotoma	prot_D-dichotoma_M_contig1357.2682.1	0.278228	0.691102	0.917079	3.38343	3.07807	3.75121	1.92433	unbiased
Dictyota dichotoma	prot_D-dichotoma_M_contig1358.2684.1	1.12902	3.25789		0.0391768	0	0.0892669	0	not_expressed
Dictyota dichotoma	prot_D-dichotoma_M_contig1358.2685.1	-0.711083	0.637727	0.68718	1.15123	1.97799	0.719593	1.34562	unbiased
Dictyota dichotoma	prot_D-dichotoma_M_contig1358.2686.1	-0.546254	0.568657	0.742464	0.735079	1.18349	0.352341	0.870385	unbiased
Dictyota dichotoma	prot_D-dichotoma_M_contig43.13868.1	-0.917204	0.589066	0.521722	10.0787	20.1751	10.4342	19.2308	unbiased
Dictyota dichotoma	prot_D-dichotoma_M_contig43.13870.1	-0.0982006	0.334521	0.945203	24.652	29.0622	10.3797	11.2596	unbiased
Dictyota dichotoma	prot_D-dichotoma_M_contig44.14070.1	1.80728	0.761035	0.217876	1.85238	0.551832	2.49407	0.409651	unbiased
Dictyota dichotoma	prot_D-dichotoma_M_contig44.14074.1	1.11321	0.774102	0.567607	0.580554	0.288935	0.46277	0.262812	not_expressed
Dictyota dichotoma	prot_D-dichotoma_M_contig44.14076.1	4.00447	1.76102	0.24851	0.56843	0.0393145	0.839997	0.08791	not_expressed
Dictyota dichotoma	prot_D-dichotoma_M_contig44.14077.1	0.0177916	0.384695	0.993351	268.168	264.527	140.266	135.118	unbiased
Dictyota dichotoma	prot_D-dichotoma_M_contig44.14082.1	-0.252821	0.470867	0.878952	2.48064	3.10326	1.31913	2.11047	unbiased
Dictyota dichotoma	prot_D-dichotoma_M_contig44.14083.1	0.220773	0.166386	0.607517	15.5009	14.1443	3.40149	4.20557	unbiased
Dictyota dichotoma	prot_D-dichotoma_M_contig534.15898.1	0.130071	0.232672	0.873751	34.2976	33.2152	8.50646	15.0142	unbiased
Dictyota dichotoma	prot_D-dichotoma_M_contig534.15899.1	-0.0994562	0.364735	0.948817	5.53553	6.27037	2.60509	4.27534	unbiased
Dictyota dichotoma	prot_D-dichotoma_M_contig534.15901.1	-0.0860622	0.445943	0.967866	3.98709	4.47679	2.59564	3.10236	unbiased
Dictyota dichotoma	prot_D-dichotoma_M_contig534.15902.1	-0.0369153	0.463745	0.98965	5.35489	5.82441	3.45741	3.91805	unbiased
Dictyota dichotoma	prot_D-dichotoma_M_contig534.15903.1	-0.205961	0.457434	0.903358	3.5704	4.24362	2.43579	1.70528	unbiased
Dictyota dichotoma	prot_D-dichotoma_M_contig534.15904.1	-0.204013	0.225919	0.760983	6.69218	8.26367	1.46257	3.6218	unbiased
Dictyota dichotoma	prot_D-dichotoma_M_contig534.15912.1	-0.24591	0.222501	0.690425	32.6868	41.5797	7.39029	12.7498	unbiased
Dictyota dichotoma	prot_D-dichotoma_M_contig534.15917.1	0.204126	0.45961	0.905502	28.2305	27.4682	14.1554	22.4247	unbiased
Dictyota dichotoma	prot_D-dichotoma_M_contig534.15918.1	0.228275	0.158863	0.568148	34.7621	31.8658	5.32485	6.64758	unbiased
Dictyota dichotoma	prot_D-dichotoma_M_contig536.15928.1	0.432469	0.834024	0.885708	0.469768	0.375351	0.350102	0.369137	not_expressed
Dictyota dichotoma	prot_D-dichotoma_M_contig536.15933.1	0.0561148	0.476137	0.982039	12.4573	13.0362	8.58982	9.10922	unbiased
Dictyota dichotoma	prot_D-dichotoma_M_contig536.15936.1	0.573506	0.705767	0.791856	1.14846	0.834512	0.848215	0.541792	unbiased
Dictyota dichotoma	prot_D-dichotoma_M_contig536.15937.1	-0.977881	0.369232	0.145978	6.48617	13.7757	2.11585	7.0031	unbiased
Dictyota dichotoma	prot_D-dichotoma_M_contig536.15939.1	0.0237532	0.429552	0.992643	21.9849	22.4347	11.0591	11.9912	unbiased
Dictyota dichotoma	prot_D-dichotoma_M_contig278.9574.1	0.566047	0.323851	0.44698	3.51319	2.52233	1.50569	0.863483	unbiased
Dictyota dichotoma	prot_D-dichotoma_M_contig278.9579.1	-0.0475003	0.599778	0.98965	0.950844	1.02006	0.588004	0.505895	unbiased
Dictyota dichotoma	prot_D-dichotoma_M_contig279.9626.1	-0.840724	0.443301	0.389451	166.826	326.005	60.0304	229.52	unbiased
Dictyota dichotoma	prot_D-dichotoma_M_contig280.9685.1	1.10606	3.25158		0.0730213	0.0293573	0.230914	0.0656448	not_expressed
Dictyota dichotoma	prot_D-dichotoma_M_contig280.9690.1	-4.42251	2.71833	0.496372	0.016169	0.867749	0.0511309	1.22667	not_expressed
Dictyota dichotoma	prot_D-dichotoma_M_contig1631.4408.1	1.22703	0.607209	0.344741	7.07637	2.95274	4.7591	3.40687	unbiased
Dictyota dichotoma	prot_D-dichotoma_M_contig1633.4418.1	1.16468	1.00255	0.670117	1.09911	0.532946	1.62557	0.785046	unbiased
Dictyota dichotoma	prot_D-dichotoma_M_contig1635.4423.1	0.682267	0.505597	0.598428	114.163	74.2375	78.1493	53.7699	unbiased
Dictyota dichotoma	prot_D-dichotoma_M_contig1635.4427.1	0.848347	0.674241	0.635592	1.48942	0.873423	1.38083	0.596228	unbiased
Dictyota dichotoma	prot_D-dichotoma_M_contig1000.103.1	0.781911	0.709198	0.690922	81.226	48.0241	79.9747	50.8506	unbiased
Dictyota dichotoma	prot_D-dichotoma_M_contig997.20569.1	0.465565	0.599862	0.800772	1.85092	1.31185	1.3567	0.755976	unbiased
Dictyota dichotoma	prot_D-dichotoma_M_contig997.20570.1	0.503183	0.414843	0.650151	98.3817	77.652	53.7889	29.0947	unbiased
Dictyota dichotoma	prot_D-dichotoma_M_contig998.20573.1	-0.0273707	0.304114	0.986329	4.24228	4.49503	2.02462	0.78483	unbiased
Dictyota dichotoma	prot_D-dichotoma_M_contig7.17867.1	3.552	2.29801	0.525933	0.240566	0	0.428824	0	not_expressed
Dictyota dichotoma	prot_D-dichotoma_M_contig7.17868.1	1.212	0.759532	0.509191	2.58923	1.14917	2.59714	0.997211	unbiased
Dictyota dichotoma	prot_D-dichotoma_M_contig7.17874.1	-0.556945	0.25031	0.268239	7.23435	11.2687	2.23438	4.66138	unbiased
Dictyota dichotoma	prot_D-dichotoma_M_contig7.17886.1	-0.180811	0.38973	0.899577	6.03236	6.9534	3.06781	3.18123	unbiased
Dictyota dichotoma	prot_D-dichotoma_M_contig7.17888.1	0.260647	0.327859	0.7971	14.0109	11.943	4.70294	4.95967	unbiased
Dictyota dichotoma	prot_D-dichotoma_M_contig744.18289.1	0.856921	0.428746	0.351906	3.07907	1.73738	2.74462	0.47926	unbiased
Dictyota dichotoma	prot_D-dichotoma_M_contig746.18303.1	1.29067	1.02354	0.634328	0.741907	0.326881	0.89	0.283887	not_expressed
Dictyota dichotoma	prot_D-dichotoma_M_contig164.4447.1	0.0544212	0.792802	0.9908	1.94808	1.91704	1.63561	2.22396	unbiased
Dictyota dichotoma	prot_D-dichotoma_M_contig165.4498.1	-0.117379	0.184913	0.847719	53.0143	61.1922	12.9353	17.7958	unbiased
Dictyota dichotoma	prot_D-dichotoma_M_contig1815.5373.1	-0.0100126	0.312782	0.995355	14.4177	14.8066	6.94353	4.62869	unbiased
Dictyota dichotoma	prot_D-dichotoma_M_contig1816.5374.1	0.469768	0.517278	0.759551	8.55563	6.31079	6.70257	3.04128	unbiased
Dictyota dichotoma	prot_D-dichotoma_M_contig1819.5379.1	-0.588992	0.747759	0.798302	1.84726	3.01653	1.17337	3.15634	unbiased
Dictyota dichotoma	prot_D-dichotoma_M_contig1820.5393.1	0.595944	0.502282	0.65973	9.3345	6.97342	6.54254	4.13638	unbiased
Dictyota dichotoma	prot_D-dichotoma_M_contig1820.5394.1	0.423429	0.327605	0.621188	47.2372	38.5582	17.7267	14.8776	unbiased
Dictyota dichotoma	prot_D-dichotoma_M_contig1822.5398.1	0.0162016	0.270732	0.991648	24.1325	24.9825	10.8783	9.138	unbiased
Dictyota dichotoma	prot_D-dichotoma_M_contig691.17796.1	-1.19409	0.480018	0.184764	5.50079	12.6077	3.66489	7.82336	unbiased
Dictyota dichotoma	prot_D-dichotoma_M_contig692.17806.1	-0.170068	0.362795	0.898951	51.0298	59.1442	23.637	16.7179	unbiased
Dictyota dichotoma	prot_D-dichotoma_M_contig693.17808.1	-1.13407	1.08383	0.711102	0.114857	0.281426	0.0978358	0.252504	not_expressed
Dictyota dichotoma	prot_D-dichotoma_M_contig693.17809.1	-0.243167	0.221945	0.692743	12.8553	15.9415	4.07172	4.03927	unbiased
Dictyota dichotoma	prot_D-dichotoma_M_contig693.17812.1	-0.422917	0.266893	0.512617	32.4253	45.6629	11.5279	17.8186	unbiased
Dictyota dichotoma	prot_D-dichotoma_M_contig694.17819.1	1.85414	0.787305	0.223348	0.920623	0.268424	0.667944	0.204018	not_expressed
Dictyota dichotoma	prot_D-dichotoma_M_contig694.17820.1	1.8519	1.4706	0.635059	0.321689	0.095084	0.421591	0.0981967	not_expressed
Dictyota dichotoma	prot_D-dichotoma_M_contig1249.1949.1	0.159714	0.283326	0.872399	24.5395	22.4471	8.10033	10.7791	unbiased
Dictyota dichotoma	prot_D-dichotoma_M_contig1251.1972.1	0.305781	1.42401	0.963951	0.288636	0.232419	0.325307	0.32731	not_expressed
Dictyota dichotoma	prot_D-dichotoma_M_contig1253.1978.1	0.108007	0.165306	0.842504	85.2202	84.8582	13.8206	16.4435	unbiased
Dictyota dichotoma	prot_D-dichotoma_M_contig1253.1981.1	-0.0156361	0.182193	0.987916	66.7987	71.6775	14.3242	23.3697	unbiased
Dictyota dichotoma	prot_D-dichotoma_M_contig238.8103.1	-0.467061	0.895769	0.88479	1.3838	1.87387	1.32643	1.84433	unbiased
Dictyota dichotoma	prot_D-dichotoma_M_contig238.8104.1	0.571441	0.496064	0.674298	154.386	107.604	103.503	51.9766	unbiased
Dictyota dichotoma	prot_D-dichotoma_M_contig238.8109.1	1.10443	0.631129	0.4462	8.84922	4.03622	3.8858	3.61427	unbiased
Dictyota dichotoma	prot_D-dichotoma_M_contig238.8110.1	1.31722	0.449521	0.0907215	40.6786	16.359	18.2793	13.9469	unbiased
Dictyota dichotoma	prot_D-dichotoma_M_contig238.8114.1	-0.207346	0.175632	0.66167	27.364	32.9516	6.28043	6.69418	unbiased
Dictyota dichotoma	prot_D-dichotoma_M_contig239.8142.1	-1.13996	0.528735	0.292312	5.90352	14.4424	4.3158	14.4837	unbiased
Dictyota dichotoma	prot_D-dichotoma_M_contig239.8147.1	1.8398	0.966998	0.388255	2.28462	0.676537	3.0175	0.971117	unbiased
Dictyota dichotoma	prot_D-dichotoma_M_contig239.8149.1	-0.601414	0.368722	0.49458	16.6072	27.0511	5.94548	17.5674	unbiased
Dictyota dichotoma	prot_D-dichotoma_M_contig239.8150.1	-0.518268	0.313434	0.48408	17.3791	26.1298	5.41088	14.8278	unbiased
Dictyota dichotoma	prot_D-dichotoma_M_contig240.8206.1	0.258946	0.567818	0.902455	2.34503	1.96121	1.57732	1.28571	unbiased
Dictyota dichotoma	prot_D-dichotoma_M_contig2633.9073.1	-0.93644	0.433929	0.292162	1.92513	3.86611	0.882501	2.0971	unbiased
Dictyota dichotoma	prot_D-dichotoma_M_contig2633.9074.1	-0.191296	0.230725	0.787507	8.89556	10.9788	2.33645	3.58454	unbiased
Dictyota dichotoma	prot_D-dichotoma_M_contig2636.9078.1	0.35674	0.905592	0.9192	0.808336	0.608694	0.819705	0.740116	not_expressed
Dictyota dichotoma	prot_D-dichotoma_M_contig2639.9083.1	0.106072	0.612057	0.971725	3.21356	2.95273	2.64536	1.50046	unbiased
Dictyota dichotoma	prot_D-dichotoma_M_contig2645.9102.1	-0.452834	0.440499	0.717359	3.02571	4.30276	1.82517	2.56253	unbiased
Dictyota dichotoma	prot_D-dichotoma_M_contig938.20109.1	-0.0740455	0.173987	0.910089	13.3566	14.715	3.17147	3.52535	unbiased
Dictyota dichotoma	prot_D-dichotoma_M_contig940.20149.1	1.62021	0.758392	0.300739	7.81502	2.71248	6.97213	3.40429	unbiased
Dictyota dichotoma	prot_D-dichotoma_M_contig941.20151.1	-0.630003	1.0844	0.865436	0.376444	0.601146	0.36248	0.683465	not_expressed
Dictyota dichotoma	prot_D-dichotoma_M_contig3867.12797.1	-0.723092	0.201279	0.0202349	26.4734	46.1537	4.64285	11.0486	unbiased
Dictyota dichotoma	prot_D-dichotoma_M_contig3870.12814.1	-0.396379	0.34104	0.669705	48.004	66.3308	21.5236	22.2173	unbiased
Dictyota dichotoma	prot_D-dichotoma_M_contig3870.12815.1	-0.376305	0.847629	0.905541	0.283195	0.393648	0.343155	0.32109	not_expressed
Dictyota dichotoma	prot_D-dichotoma_M_contig3872.12818.1	0.0786409	0.399299	0.966903	718.069	684.044	407.846	310.818	unbiased
Dictyota dichotoma	prot_D-dichotoma_M_contig3873.12820.1	-0.18191	0.409966	0.905544	6.41309	7.87765	2.77314	5.68763	unbiased
Dictyota dichotoma	prot_D-dichotoma_M_contig3879.12828.1	-0.383859	0.253064	0.537215	12.7611	17.3919	5.3045	5.10334	unbiased
Dictyota dichotoma	prot_D-dichotoma_M_contig3887.12845.1	-0.109225	0.567177	0.968056	10.7665	11.7749	8.68246	10.8553	unbiased
Dictyota dichotoma	prot_D-dichotoma_M_contig862.19397.1	-0.222177	0.229054	0.738835	23.0396	28.8403	6.6526	12.8879	unbiased
Dictyota dichotoma	prot_D-dichotoma_M_contig865.19420.1	1.22197	0.855037	0.570793	3.31872	1.53825	5.80075	1.08188	unbiased
Dictyota dichotoma	prot_D-dichotoma_M_contig865.19422.1	-0.0379708	0.233786	0.97416	47.4155	50.8945	15.3354	10.7604	unbiased
Dictyota dichotoma	prot_D-dichotoma_M_contig865.19423.1	0.241754	0.29135	0.787507	186.837	174.087	62.7675	55.6343	unbiased
Dictyota dichotoma	prot_D-dichotoma_M_contig866.19425.1	0.0504169	0.240751	0.965223	35.2936	36.3334	6.339	9.92391	unbiased
Dictyota dichotoma	prot_D-dichotoma_M_contig1040.428.1	-0.176928	0.357323	0.891112	27.9494	33.0544	11.1849	14.422	unbiased
Dictyota dichotoma	prot_D-dichotoma_M_contig1041.433.1	2.8246	1.0781	0.152606	0.521394	0.0836718	0.804753	0.151856	not_expressed
Dictyota dichotoma	prot_D-dichotoma_M_contig3289.11302.1	0.551034	0.531168	0.71353	28.6627	20.8283	23.9446	12.4867	unbiased
Dictyota dichotoma	prot_D-dichotoma_M_contig3289.11303.1	2.64173	1.03382	0.167295	5.45521	0.954162	8.81377	0.768779	unbiased
Dictyota dichotoma	prot_D-dichotoma_M_contig3292.11316.1	1.41393	1.07911	0.613075	2.09043	0.806827	2.61782	1.18454	unbiased
Dictyota dichotoma	prot_D-dichotoma_M_contig3293.11319.1	-0.350956	0.439494	0.796758	16.7815	22.8301	6.32698	19.8559	unbiased
Dictyota dichotoma	prot_D-dichotoma_M_contig3293.11320.1	-0.232536	0.223487	0.71282	19.5964	24.4668	5.3625	7.65523	unbiased
Dictyota dichotoma	prot_D-dichotoma_M_contig2288.7700.1	0.0899475	0.395018	0.960633	44.9237	43.8344	25.7738	20.6721	unbiased
Dictyota dichotoma	prot_D-dichotoma_M_contig2288.7708.1	0.288083	1.03186	0.94768	0.299908	0.255883	0.222651	0.332274	not_expressed
Dictyota dichotoma	prot_D-dichotoma_M_contig2289.7709.1	1.34663	0.751602	0.429117	14.1035	5.54375	11.5138	5.15682	unbiased
Dictyota dichotoma	prot_D-dichotoma_M_contig2297.7743.1	3.28906	1.13159	0.0949341	0.947702	0.0972348	1.77618	0.144302	not_expressed
Dictyota dichotoma	prot_D-dichotoma_M_contig187.5608.1	-0.602267	0.306165	0.36555	5.91453	9.34549	2.51987	4.08096	unbiased
Dictyota dichotoma	prot_D-dichotoma_M_contig187.5609.1	-0.604607	0.373047	0.499093	2.92183	4.67807	1.4371	2.3519	unbiased
Dictyota dichotoma	prot_D-dichotoma_M_contig188.5660.1	-0.499295	0.378838	0.610963	5.08089	7.50763	2.81162	3.2485	unbiased
Dictyota dichotoma	prot_D-dichotoma_M_contig304.10538.1	0.173676	0.479459	0.927235	5.56816	4.97328	4.13458	1.97285	unbiased
Dictyota dichotoma	prot_D-dichotoma_M_contig304.10539.1	-0.17918	0.420928	0.910072	6.48762	7.42765	4.25187	2.92908	unbiased
Dictyota dichotoma	prot_D-dichotoma_M_contig713.18032.1	0.260835	3.25801		0.046224	0.0486758	0.0976469	0.108842	not_expressed
Dictyota dichotoma	prot_D-dichotoma_M_contig713.18036.1	-0.349898	0.271725	0.623024	7.49276	10.1317	3.12243	4.15341	unbiased
Dictyota dichotoma	prot_D-dichotoma_M_contig714.18040.1	0.631128	0.514509	0.645883	4.07466	2.74102	2.57458	1.28687	unbiased
Dictyota dichotoma	prot_D-dichotoma_M_contig715.18041.1	-0.0544533	0.529938	0.984667	12.7406	14.3909	6.0121	11.2451	unbiased
Dictyota dichotoma	prot_D-dichotoma_M_contig715.18042.1	-0.125334	0.409962	0.941691	8.00371	9.26036	3.68759	5.60763	unbiased
Dictyota dichotoma	prot_D-dichotoma_M_contig715.18044.1	0.643503	0.239926	0.138679	16.861	11.7377	4.36815	2.37057	unbiased
Dictyota dichotoma	prot_D-dichotoma_M_contig715.18049.1	1.06615	0.334535	0.0544275	13.6596	6.64664	7.236	1.54773	unbiased
Dictyota dichotoma	prot_D-dichotoma_M_contig715.18050.1	-0.269595	0.190735	0.577522	212.179	269.346	47.5665	72.6893	unbiased
Dictyota dichotoma	prot_D-dichotoma_M_contig715.18051.1	-1.45184	0.472155	0.0694667	24.9615	71.3874	12.4368	62.9929	unbiased
Dictyota dichotoma	prot_D-dichotoma_M_contig715.18053.1	-0.491939	0.443758	0.689488	5.54533	7.90136	2.70692	5.38408	unbiased
Dictyota dichotoma	prot_D-dichotoma_M_contig715.18056.1	-0.176884	0.857311	0.965913	3.47992	4.32472	3.81265	2.66684	unbiased
Dictyota dichotoma	prot_D-dichotoma_M_contig1657.4539.1	-0.22524	0.782478	0.946006	0.436084	0.525229	0.269795	0.447039	not_expressed
Dictyota dichotoma	prot_D-dichotoma_M_contig1657.4540.1	0.0961722	0.349383	0.947943	35.5012	35.3089	16.3137	22.9961	unbiased
Dictyota dichotoma	prot_D-dichotoma_M_contig1657.4544.1	0.045388	0.496625	0.985977	3.58736	3.65973	2.89159	1.54699	unbiased
Dictyota dichotoma	prot_D-dichotoma_M_contig1657.4546.1	-0.108246	1.06506	0.984667	2.16447	2.34581	2.70213	2.26326	unbiased
Dictyota dichotoma	prot_D-dichotoma_M_contig1659.4555.1	2.17061	2.19178		0.113116	0	0.10121	0	not_expressed
Dictyota dichotoma	prot_D-dichotoma_M_contig2039.6509.1	1.17351	0.641604	0.415824	1.62977	0.780487	1.5187	0.655977	unbiased
Dictyota dichotoma	prot_D-dichotoma_M_contig2041.6529.1	2.61746	0.621324	0.00320447	81.3278	13.9612	68.9645	9.23332	GA_biased
Dictyota dichotoma	prot_D-dichotoma_M_contig2041.6530.1	2.74623	1.53897	0.431894	0.42933	0.0763938	0.501499	0.170822	not_expressed
Dictyota dichotoma	prot_D-dichotoma_M_contig2047.6545.1	1.47452	2.62008		0.0967227	0.0262885	0.167693	0.0587828	not_expressed
Dictyota dichotoma	prot_D-dichotoma_M_contig264.9089.1	-1.27982	0.621807	0.332203	0.618382	1.60318	0.308079	1.01666	unbiased
Dictyota dichotoma	prot_D-dichotoma_M_contig264.9091.1				0	0	0	0	not_expressed
Dictyota dichotoma	prot_D-dichotoma_M_contig265.9128.1	-0.267412	0.672096	0.917953	2.49457	3.07841	2.54538	2.23541	unbiased
Dictyota dichotoma	prot_D-dichotoma_M_contig266.9170.1	0.0799827	0.371237	0.963525	10.1259	10.0325	3.26492	6.31996	unbiased
Dictyota dichotoma	prot_D-dichotoma_M_contig266.9171.1	0.737387	0.389882	0.392057	13.1662	8.71705	7.39769	1.1305	unbiased
Dictyota dichotoma	prot_D-dichotoma_M_contig615.17042.1	-0.0411014	0.918677	0.993391	0.794198	0.882246	0.870909	0.679414	not_expressed
Dictyota dichotoma	prot_D-dichotoma_M_contig616.17056.1	0.894088	0.523995	0.463388	2.0583	1.14991	1.37296	0.409778	unbiased
Dictyota dichotoma	prot_D-dichotoma_M_contig616.17057.1	0.00290548	0.64506	0.998804	1.46308	1.49224	0.935741	1.09169	unbiased
Dictyota dichotoma	prot_D-dichotoma_M_contig616.17058.1	-0.49322	0.260764	0.392057	20.2011	29.8489	7.36453	6.37826	unbiased
Dictyota dichotoma	prot_D-dichotoma_M_contig617.17061.1	-0.293235	0.184366	0.510479	15.2963	19.8265	3.55394	4.59717	unbiased
Dictyota dichotoma	prot_D-dichotoma_M_contig617.17062.1	-0.158177	0.245366	0.845507	23.4481	27.0538	7.35995	6.61924	unbiased
Dictyota dichotoma	prot_D-dichotoma_M_contig618.17070.1	2.29808	1.09023	0.312232	1.67496	0.331108	3.27477	0.541763	unbiased
Dictyota dichotoma	prot_D-dichotoma_M_contig619.17079.1	-0.450478	0.243621	0.408005	156.411	228.569	34.3424	79.9276	unbiased
Dictyota dichotoma	prot_D-dichotoma_M_contig388.12834.1	-0.384107	0.278552	0.589545	37.0663	50.1774	16.7622	17.9029	unbiased
Dictyota dichotoma	prot_D-dichotoma_M_contig389.12852.1	-0.234323	0.324077	0.820187	37.2095	47.1746	12.6033	27.2166	unbiased
Dictyota dichotoma	prot_D-dichotoma_M_contig290.10028.1	0.32901	0.373807	0.768274	8.16635	7.07775	3.3001	3.11899	unbiased
Dictyota dichotoma	prot_D-dichotoma_M_contig290.10029.1	0.34934	0.314446	0.688517	10.0942	8.42991	3.04059	3.36511	unbiased
Dictyota dichotoma	prot_D-dichotoma_M_contig290.10032.1	-0.0282406	0.362048	0.98965	10.6704	11.4391	3.98766	3.19056	unbiased
Dictyota dichotoma	prot_D-dichotoma_M_contig291.10055.1	-0.107012	0.435729	0.95523	5.3203	6.0682	3.42865	2.94862	unbiased
Dictyota dichotoma	prot_D-dichotoma_M_contig291.10061.1	-0.415829	0.786	0.881826	0.622915	0.84787	0.491053	0.778005	not_expressed
Dictyota dichotoma	prot_D-dichotoma_M_contig291.10066.1	-0.722059	0.929271	0.800772	0.398182	0.702455	0.402899	0.6949	not_expressed
Dictyota dichotoma	prot_D-dichotoma_M_contig291.10073.1	0.216618	0.144277	0.542134	17.1168	15.6857	3.5079	4.23827	unbiased
Dictyota dichotoma	prot_D-dichotoma_M_contig292.10104.1	-0.211777	0.252163	0.782843	3.89783	4.64837	1.27547	1.05163	unbiased
Dictyota dichotoma	prot_D-dichotoma_M_contig292.10109.1				0	0	0	0	not_expressed
Dictyota dichotoma	prot_D-dichotoma_M_contig292.10111.1	-0.154543	0.492573	0.939593	21.4386	23.895	12.1313	14.8335	unbiased
Dictyota dichotoma	prot_D-dichotoma_M_contig292.10112.1	0.197007	0.283939	0.828443	4.95441	4.53249	1.48883	1.58473	unbiased
Dictyota dichotoma	prot_D-dichotoma_M_contig620.17100.1	0.0759022	0.493405	0.975805	10.2243	9.78389	3.99824	10.6044	unbiased
Dictyota dichotoma	prot_D-dichotoma_M_contig620.17106.1	0.00884843	0.192643	0.993376	9.64998	10.2942	2.16635	2.21777	unbiased
Dictyota dichotoma	prot_D-dichotoma_M_contig623.17138.1	-0.403544	0.223053	0.423917	22.2691	30.7643	6.0341	10.7017	unbiased
Dictyota dichotoma	prot_D-dichotoma_M_contig118.1445.1				0	0	0	0	not_expressed
Dictyota dichotoma	prot_D-dichotoma_M_contig118.1456.1	-0.297744	0.280266	0.705844	17.761	23.7238	5.5606	8.19988	unbiased
Dictyota dichotoma	prot_D-dichotoma_M_contig118.1458.1	-0.126043	0.237833	0.881826	3.18783	3.61226	1.08391	0.762307	unbiased
Dictyota dichotoma	prot_D-dichotoma_M_contig118.1460.1	0.576783	0.567724	0.721584	1.02416	0.702631	0.843364	0.0859949	unbiased
Dictyota dichotoma	prot_D-dichotoma_M_contig1375.2770.1	0.0354421	0.209981	0.971942	18.618	19.2513	5.11811	5.69448	unbiased
Dictyota dichotoma	prot_D-dichotoma_M_contig1378.2789.1	-0.567277	0.229922	0.189742	6.4519	10.2373	1.75741	5.01045	unbiased
Dictyota dichotoma	prot_D-dichotoma_M_contig1379.2794.1	1.15825	1.06055	0.694187	0.847922	0.428673	1.14728	0.527986	not_expressed
Dictyota dichotoma	prot_D-dichotoma_M_contig247.8471.1	-0.212565	0.414218	0.887187	7.84735	9.6592	4.58423	6.06882	unbiased
Dictyota dichotoma	prot_D-dichotoma_M_contig247.8473.1	-1.11111	1.32375	0.78303	0.510805	1.08346	0.921825	0.89229	unbiased
Dictyota dichotoma	prot_D-dichotoma_M_contig247.8480.1	-0.287807	0.160641	0.429117	6.00926	7.79851	1.21217	2.26857	unbiased
Dictyota dichotoma	prot_D-dichotoma_M_contig248.8509.1	3.47421	0.791223	0.00174035	2.02317	0.180515	1.48286	0.190885	GA_specific
Dictyota dichotoma	prot_D-dichotoma_M_contig98.20452.1	2.17674	0.862347	0.176792	1.74142	0.398635	1.08322	0.552133	unbiased
Dictyota dichotoma	prot_D-dichotoma_M_contig98.20457.1	0.95805	0.516988	0.406304	5.25163	2.65786	5.08793	0.950939	unbiased
Dictyota dichotoma	prot_D-dichotoma_M_contig98.20458.1	-2.77321	1.62741		0.0509239	0.511557	0.10792	0.300604	not_expressed
Dictyota dichotoma	prot_D-dichotoma_M_contig98.20459.1	-0.0988295	0.783624	0.980627	1.26068	1.32306	1.24845	0.803491	unbiased
Dictyota dichotoma	prot_D-dichotoma_M_contig98.20460.1	-0.836071	0.508525	0.488056	3.53347	6.59208	2.52765	4.3423	unbiased
Dictyota dichotoma	prot_D-dichotoma_M_contig98.20462.1	-0.270382	0.475921	0.870987	2.5073	3.12478	2.0158	1.1839	unbiased
Dictyota dichotoma	prot_D-dichotoma_M_contig99.20515.1	0.989919	0.636852	0.523084	5.82414	3.1046	5.59264	1.97143	unbiased
Dictyota dichotoma	prot_D-dichotoma_M_contig99.20533.1	0.238146	0.779523	0.941774	1.50852	1.3322	1.22503	1.52424	unbiased
Dictyota dichotoma	prot_D-dichotoma_M_contig202.6414.1	-0.0174779	0.318949	0.992755	78.5881	81.363	32.507	21.9707	unbiased
Dictyota dichotoma	prot_D-dichotoma_M_contig203.6463.1	-0.343632	0.515688	0.838738	2.41188	3.22962	0.939014	2.28231	unbiased
Dictyota dichotoma	prot_D-dichotoma_M_contig203.6474.1	-1.00751	0.849961	0.660219	3.82287	8.09311	6.62045	4.97145	unbiased
Dictyota dichotoma	prot_D-dichotoma_M_contig204.6510.1	-0.272377	0.369114	0.814544	98.5291	131.586	48.8397	60.7822	unbiased
Dictyota dichotoma	prot_D-dichotoma_M_contig204.6515.1	1.12938	0.476594	0.219538	1.19948	0.58465	0.6525	0.458449	unbiased
Dictyota dichotoma	prot_D-dichotoma_M_contig204.6519.1	1.69112	0.838798	0.346034	1.63115	0.550191	1.2677	0.630723	unbiased
Dictyota dichotoma	prot_D-dichotoma_M_contig1402.2998.1	0.0525655	0.171634	0.941636	56.7122	58.0433	8.81748	15.1122	unbiased
Dictyota dichotoma	prot_D-dichotoma_M_contig1402.2999.1	-0.146033	0.19728	0.813984	91.7003	108.761	12.3487	36.924	unbiased
Dictyota dichotoma	prot_D-dichotoma_M_contig1403.3006.1	-0.136944	0.189909	0.820781	10.2817	11.7675	3.44134	1.99824	unbiased
Dictyota dichotoma	prot_D-dichotoma_M_contig1404.3010.1	1.02837	0.340193	0.0763404	4.50144	2.27656	2.28568	0.258229	unbiased
Dictyota dichotoma	prot_D-dichotoma_M_contig852.19316.1	0.0796795	0.162174	0.892535	39.7803	39.9874	6.08561	5.26652	unbiased
Dictyota dichotoma	prot_D-dichotoma_M_contig854.19329.1	0.465571	0.295826	0.517162	7.44832	5.75034	1.73534	2.32319	unbiased
Dictyota dichotoma	prot_D-dichotoma_M_contig856.19336.1	0.123258	1.98864	0.991411	0.420012	0.445425	0.950449	0.432506	not_expressed
Dictyota dichotoma	prot_D-dichotoma_M_contig3179.10963.1	0.591294	0.696241	0.779142	1.12773	0.778868	1.13039	0.433039	unbiased
Dictyota dichotoma	prot_D-dichotoma_M_contig3183.10976.1	0.607912	0.533868	0.679577	6.01903	3.9851	6.35152	1.29375	unbiased
Dictyota dichotoma	prot_D-dichotoma_M_contig3184.10980.1	4.68597	1.13349	0.00412098	1.44845	0.057949	2.16693	0.081249	GA_specific
Dictyota dichotoma	prot_D-dichotoma_M_contig3186.10985.1	-0.318758	0.322426	0.732433	29.1222	40.0468	11.9116	17.1236	unbiased
Dictyota dichotoma	prot_D-dichotoma_M_contig3188.10989.1	-0.703634	0.257256	0.127429	23.9405	39.6808	7.93517	11.1933	unbiased
Dictyota dichotoma	prot_D-dichotoma_M_contig3190.11003.1	1.2819	0.726161	0.441103	0.491462	0.219067	0.273143	0.200174	not_expressed
Dictyota dichotoma	prot_D-dichotoma_M_contig3190.11004.1	2.85387	3.22382		0.156832	0	0.336311	0	not_expressed
Dictyota dichotoma	prot_D-dichotoma_M_contig3190.11005.1	1.12902	3.25789		0.0359582	0	0.060943	0	not_expressed
Dictyota dichotoma	prot_D-dichotoma_M_contig3193.11013.1	0.837903	3.25801		0.0173319	0	0.0548083	0	not_expressed
Dictyota dichotoma	prot_D-dichotoma_M_contig4291.13849.1	-0.448284	0.932438	0.895618	0.948924	1.42858	0.783757	1.31993	unbiased
Dictyota dichotoma	prot_D-dichotoma_M_contig4295.13851.1	0.576114	2.13573		0.110595	0.0695369	0.123332	0.155489	not_expressed
Dictyota dichotoma	prot_D-dichotoma_M_contig4298.13855.1	1.44713	2.90326		0.191516	0.0764449	0.385195	0.170936	not_expressed
Dictyota dichotoma	prot_D-dichotoma_M_contig4298.13856.1	2.23324	3.01289		0.104496	0	0.146053	0	not_expressed
Dictyota dichotoma	prot_D-dichotoma_M_contig4299.13859.1	0	0		0.138139	0	0.436834	0	not_expressed
Dictyota dichotoma	prot_D-dichotoma_M_contig4308.13900.1	-0.153798	3.21294		0.0461068	0.0663137	0.0877632	0.148282	not_expressed
Dictyota dichotoma	prot_D-dichotoma_M_contig4310.13916.1	-0.533134	0.424976	0.637344	14.2871	21.5887	6.17313	13.9455	unbiased
Dictyota dichotoma	prot_D-dichotoma_M_contig1895.5725.1	1.0184	0.606	0.47421	373.053	192.723	404.098	118.293	unbiased
Dictyota dichotoma	prot_D-dichotoma_M_contig1896.5728.1	-0.569879	0.239047	0.216414	11.8509	19.1533	2.19708	8.70499	unbiased
Dictyota dichotoma	prot_D-dichotoma_M_contig1896.5729.1	0.0439162	0.225808	0.96763	2.60008	2.68473	0.438	0.884172	unbiased
Dictyota dichotoma	prot_D-dichotoma_M_contig1898.5738.1	-0.024089	0.56183	0.993594	1.74909	1.89514	1.20887	0.484593	unbiased
Dictyota dichotoma	prot_D-dichotoma_M_contig1899.5740.1	1.04179	0.980781	0.705844	0.700843	0.358761	0.796193	0.428701	not_expressed
Dictyota dichotoma	prot_D-dichotoma_M_contig726.18141.1	0.881789	3.25601		0.0695642	0.0335695	0.147611	0.0750637	not_expressed
Dictyota dichotoma	prot_D-dichotoma_M_contig726.18142.1	3.82601	2.05094	0.40225	0.266544	0	0.413538	0	not_expressed
Dictyota dichotoma	prot_D-dichotoma_M_contig726.18146.1	1.07706	3.23846		0.0658373	0.0336638	0.160091	0.0752746	not_expressed
Dictyota dichotoma	prot_D-dichotoma_M_contig726.18147.1	0.817	0.831953	0.73472	2.76384	1.72693	3.07511	1.37607	unbiased
Dictyota dichotoma	prot_D-dichotoma_M_contig726.18148.1	-0.639925	0.598131	0.703907	10.9847	17.5612	11.6837	11.8938	unbiased
Dictyota dichotoma	prot_D-dichotoma_M_contig726.18153.1	-2.52403	0.777351	0.0479877	6.17059	37.3775	9.21675	45.5215	SP_biased
Dictyota dichotoma	prot_D-dichotoma_M_contig726.18154.1	-0.238125	0.608907	0.920161	2.28992	2.92817	1.65615	2.71685	unbiased
Dictyota dichotoma	prot_D-dichotoma_M_contig728.18160.1	-0.251487	0.251857	0.728089	9.56192	11.9586	3.02052	2.40307	unbiased
Dictyota dichotoma	prot_D-dichotoma_M_contig728.18161.1	0.852119	0.400447	0.303364	17.1523	10.1172	8.27796	3.7863	unbiased
Dictyota dichotoma	prot_D-dichotoma_M_contig728.18162.1	0.574591	0.436424	0.61141	6.99969	4.77551	4.0516	2.59247	unbiased
Dictyota dichotoma	prot_D-dichotoma_M_contig728.18163.1	-0.0851971	0.50109	0.971914	4.75587	5.05606	3.47491	3.30391	unbiased
Dictyota dichotoma	prot_D-dichotoma_M_contig728.18164.1	0.692535	0.438041	0.513836	1.94006	1.27156	1.18987	0.651893	unbiased
Dictyota dichotoma	prot_D-dichotoma_M_contig729.18169.1	1.44275	3.13189		0.113231	0.0293052	0.239613	0.0655284	not_expressed
Dictyota dichotoma	prot_D-dichotoma_M_contig729.18170.1	-0.399496	0.271062	0.553197	36.4478	50.062	10.1406	12.3474	unbiased
Dictyota dichotoma	prot_D-dichotoma_M_contig730.18182.1	-0.0899075	0.251233	0.928509	8.2804	9.43966	2.21051	2.18045	unbiased
Dictyota dichotoma	prot_D-dichotoma_M_contig730.18183.1	0.0198144	0.462522	0.993594	25.1373	26.5534	14.3374	15.6775	unbiased
Dictyota dichotoma	prot_D-dichotoma_M_contig4229.13721.1	0.484427	0.428882	0.68261	5.00988	4.01584	3.11948	0.894757	unbiased
Dictyota dichotoma	prot_D-dichotoma_M_contig4246.13749.1	1.05049	1.76043	0.858844	0.232772	0.135511	0.297976	0.192409	not_expressed
Dictyota dichotoma	prot_D-dichotoma_M_contig4248.13752.1	-0.129866	0.55216	0.958433	2.8212	3.0807	2.0798	1.36781	unbiased
Dictyota dichotoma	prot_D-dichotoma_M_contig4248.13753.1	-0.365398	0.380487	0.742464	10.0467	13.2285	4.99809	7.68067	unbiased
Dictyota dichotoma	prot_D-dichotoma_M_contig4251.13776.1	2.98253	0.853636	0.0271103	1.52768	0.204157	0.978677	0.264625	GA_specific
Dictyota dichotoma	prot_D-dichotoma_M_contig4251.13778.1	-0.469826	0.594243	0.797596	2.99221	4.43653	1.8114	2.62859	unbiased
Dictyota dichotoma	prot_D-dichotoma_M_contig4252.13780.1	2.25449	0.941876	0.212645	1.13983	0.248109	0.769336	0.423819	unbiased
Dictyota dichotoma	prot_D-dichotoma_M_contig4252.13781.1	-5.04733	1.00462	0.000160018	0.547075	19.0162	0.72405	26.586	SP_specific
Dictyota dichotoma	prot_D-dichotoma_M_contig1639.4439.1	0.228445	0.308535	0.813984	10.2097	9.30531	4.41808	2.83283	unbiased
Dictyota dichotoma	prot_D-dichotoma_M_contig1640.4456.1	-0.0872793	1.20428	0.990321	0.456951	0.49999	0.587602	0.423	not_expressed
Dictyota dichotoma	prot_D-dichotoma_M_contig1641.4462.1	-0.324913	0.602945	0.878634	0.803262	1.04354	0.51325	0.651742	unbiased
Dictyota dichotoma	prot_D-dichotoma_M_contig1642.4464.1	0.0351241	0.466258	0.99023	32.6889	32.7065	20.2455	13.025	unbiased
Dictyota dichotoma	prot_D-dichotoma_M_contig1642.4465.1	-0.10367	0.515457	0.966429	45.9938	50.2748	29.4572	24.6484	unbiased
Dictyota dichotoma	prot_D-dichotoma_M_contig1642.4466.1	0.0574155	0.221142	0.951445	12.7718	13.0348	3.7429	4.53419	unbiased
Dictyota dichotoma	prot_D-dichotoma_M_contig1642.4470.1	0.156739	0.453375	0.93154	2.14225	2.04435	0.785264	1.02232	unbiased
Dictyota dichotoma	prot_D-dichotoma_M_contig2203.7355.1	-0.223266	0.313688	0.82433	59.1969	75.4698	20.3174	39.3343	unbiased
Dictyota dichotoma	prot_D-dichotoma_M_contig2205.7363.1	-0.00429748	0.848024	0.998804	0.944027	0.953498	1.13473	0.457293	not_expressed
Dictyota dichotoma	prot_D-dichotoma_M_contig2205.7364.1	-0.291859	0.939387	0.94063	0.547138	0.630166	0.662057	0.53078	not_expressed
Dictyota dichotoma	prot_D-dichotoma_M_contig2205.7367.1	-0.272667	0.529053	0.886498	2.80519	3.47949	1.58956	2.38303	unbiased
Dictyota dichotoma	prot_D-dichotoma_M_contig2206.7370.1	1.28343	0.81188	0.513836	1.15718	0.516803	0.894081	0.388938	unbiased
Dictyota dichotoma	prot_D-dichotoma_M_contig2207.7374.1	0.0769609	0.256026	0.942828	29.1403	30.3034	8.18853	11.7109	unbiased
Dictyota dichotoma	prot_D-dichotoma_M_contig2208.7381.1	0.0655231	0.387473	0.971942	28.6945	29.8008	13.9511	15.1824	unbiased
Dictyota dichotoma	prot_D-dichotoma_M_contig2211.7394.1	0.566321	0.62561	0.760188	10.2379	7.22251	8.20169	5.97755	unbiased
Dictyota dichotoma	prot_D-dichotoma_M_contig2211.7395.1	-0.154138	0.478491	0.937389	16.5983	19.3128	10.0216	8.93185	unbiased
Dictyota dichotoma	prot_D-dichotoma_M_contig1420.3090.1	2.87414	1.61989	0.436234	0.18548	0.0232158	0.247456	0.0519121	not_expressed
Dictyota dichotoma	prot_D-dichotoma_M_contig1421.3094.1	-0.714207	0.75339	0.745529	1.4688	2.56685	1.12073	2.51287	unbiased
Dictyota dichotoma	prot_D-dichotoma_M_contig1421.3095.1	-0.486117	0.51478	0.746925	1.3593	2.06109	0.774559	1.88271	unbiased
Dictyota dichotoma	prot_D-dichotoma_M_contig1421.3097.1	-0.358737	0.327314	0.692498	3.34798	4.54749	1.54821	2.483	unbiased
Dictyota dichotoma	prot_D-dichotoma_M_contig1421.3101.1	0.184845	0.274934	0.837422	10.6913	10.022	3.84571	4.88782	unbiased
Dictyota dichotoma	prot_D-dichotoma_M_contig2193.7288.1	5.33583	1.34904	0.00717751	1.17408	0.0286183	2.06798	0.0342683	GA_specific
Dictyota dichotoma	prot_D-dichotoma_M_contig2193.7289.1	-0.473469	0.218218	0.288661	8.74359	12.7363	2.94983	2.58104	unbiased
Dictyota dichotoma	prot_D-dichotoma_M_contig2194.7290.1	-0.843276	0.811932	0.71353	4.67917	8.57355	6.42845	8.72447	unbiased
Dictyota dichotoma	prot_D-dichotoma_M_contig2196.7295.1	-0.0558237	0.188556	0.944343	4.06365	4.49444	1.0685	1.52195	unbiased
Dictyota dichotoma	prot_D-dichotoma_M_contig2197.7300.1	-0.0615411	0.410671	0.977232	277.369	301.248	91.6845	256.454	unbiased
Dictyota dichotoma	prot_D-dichotoma_M_contig2198.7302.1	4.39315	1.37432	0.0539329	0.816468	0.0405492	1.47037	0.0431028	not_expressed
Dictyota dichotoma	prot_D-dichotoma_M_contig2199.7303.1	1.03094	0.669546	0.527983	0.759724	0.393211	0.520184	0.129444	not_expressed
Dictyota dichotoma	prot_D-dichotoma_M_contig2200.7340.1	0.219821	0.358112	0.853873	49.5115	44.3908	24.5563	18.294	unbiased
Dictyota dichotoma	prot_D-dichotoma_M_contig332.11402.1	-0.20769	0.338102	0.853856	33.246	39.6116	13.7645	16.3255	unbiased
Dictyota dichotoma	prot_D-dichotoma_M_contig332.11403.1	0.0167221	0.270069	0.991411	8.97171	9.48357	3.3317	3.09615	unbiased
Dictyota dichotoma	prot_D-dichotoma_M_contig332.11407.1	-2.37245	3.18592		0	0.122884	0	0.274778	not_expressed
Dictyota dichotoma	prot_D-dichotoma_M_contig332.11408.1	0.837903	3.25801		0.0201708	0	0.0637856	0	not_expressed
Dictyota dichotoma	prot_D-dichotoma_M_contig537.15944.1	-1.41556	1.38073	0.718204	0.182672	0.496289	0.211319	0.645857	not_expressed
Dictyota dichotoma	prot_D-dichotoma_M_contig537.15948.1	0.495941	0.344511	0.567315	2.74918	2.12491	1.02702	0.975942	unbiased
Dictyota dichotoma	prot_D-dichotoma_M_contig538.15958.1	6.58366	1.89167	0.0281825	3.76171	0	7.16264	0	GA_specific
Dictyota dichotoma	prot_D-dichotoma_M_contig540.16016.1	1.49283	2.46302		0.193296	0.0679027	0.358202	0.0931207	not_expressed
Dictyota dichotoma	prot_D-dichotoma_M_contig1578.4012.1	-0.102872	0.310876	0.935621	35.7969	40.1274	15.1731	19.663	unbiased
Dictyota dichotoma	prot_D-dichotoma_M_contig1582.4038.1	0.0506062	0.433935	0.982649	2.51637	2.59048	1.50682	1.30884	unbiased
Dictyota dichotoma	prot_D-dichotoma_M_contig1583.4044.1	-0.02353	0.189271	0.980918	6.49656	7.07297	1.60673	2.64823	unbiased
Dictyota dichotoma	prot_D-dichotoma_M_contig1583.4046.1	1.65914	0.700645	0.219696	1.16306	0.391612	0.865241	0.386855	unbiased
Dictyota dichotoma	prot_D-dichotoma_M_contig1583.4047.1	2.5555	2.07569		0.157001	0	0.168971	0	not_expressed
Dictyota dichotoma	prot_D-dichotoma_M_contig1452.3319.1	0.368319	0.497882	0.813984	5.78444	4.75237	3.62191	3.4781	unbiased
Dictyota dichotoma	prot_D-dichotoma_M_contig1454.3322.1	0.191172	0.266544	0.821558	3.71757	3.42542	1.26941	1.21491	unbiased
Dictyota dichotoma	prot_D-dichotoma_M_contig1457.3345.1	0.0921	0.220205	0.912068	91.085	93.7724	15.5617	36.6888	unbiased
Dictyota dichotoma	prot_D-dichotoma_M_contig4703.14689.1	-1.57291	1.8004		0.0444538	0.152428	0.0764689	0.126317	not_expressed
Dictyota dichotoma	prot_D-dichotoma_M_contig4703.14691.1	0.12669	0.358424	0.929602	1.87201	1.79747	0.677369	0.879979	unbiased
Dictyota dichotoma	prot_D-dichotoma_M_contig4706.14693.1	1.44407	1.82562	0.797536	0.264651	0.104007	0.355955	0.153173	not_expressed
Dictyota dichotoma	prot_D-dichotoma_M_contig4708.14697.1	-0.2328	0.314108	0.813943	3.48849	4.29973	1.78923	1.55783	unbiased
Dictyota dichotoma	prot_D-dichotoma_M_contig4710.14711.1	-0.13481	0.550162	0.955341	2.35649	2.6473	1.73805	0.667606	unbiased
Dictyota dichotoma	prot_D-dichotoma_M_contig4714.14712.1	1.32409	0.789392	0.475408	0.977176	0.415352	0.518093	0.533972	not_expressed
Dictyota dichotoma	prot_D-dichotoma_M_contig4714.14713.1	1.23984	0.5013	0.188523	3.23357	1.47308	2.42856	0.547144	unbiased
Dictyota dichotoma	prot_D-dichotoma_M_contig4725.14739.1	-0.328038	0.470815	0.827877	2.88587	3.67498	1.89335	1.19351	unbiased
Dictyota dichotoma	prot_D-dichotoma_M_contig4729.14744.1	-0.120305	1.575	0.989738	0.212427	0.240983	0.265674	0.290768	not_expressed
Dictyota dichotoma	prot_D-dichotoma_M_contig4740.14778.1	0.344803	0.510779	0.836713	2.62775	2.11618	1.331	1.32684	unbiased
Dictyota dichotoma	prot_D-dichotoma_M_contig678.17675.1	0.609108	1.40563	0.907604	1.02911	0.617165	2.02201	0.694425	unbiased
Dictyota dichotoma	prot_D-dichotoma_M_contig678.17679.1	0.302566	0.685365	0.905669	4.25697	3.50456	3.15438	2.76203	unbiased
Dictyota dichotoma	prot_D-dichotoma_M_contig680.17697.1	0.635386	0.306355	0.327637	29.9337	21.0857	10.7742	3.27009	unbiased
Dictyota dichotoma	prot_D-dichotoma_M_contig681.17700.1	-0.182409	0.459077	0.918196	13.7391	17.0124	8.65062	6.6702	unbiased
Dictyota dichotoma	prot_D-dichotoma_M_contig819.19007.1	1.65522	0.64903	0.168286	3.35855	1.04846	3.33275	0.459408	unbiased
Dictyota dichotoma	prot_D-dichotoma_M_contig819.19008.1	1.46727	0.498378	0.0883894	5.88527	2.1163	5.16765	1.07159	unbiased
Dictyota dichotoma	prot_D-dichotoma_M_contig820.19033.1	-0.121578	0.430318	0.946901	8.33288	9.82504	3.77867	4.96049	unbiased
Dictyota dichotoma	prot_D-dichotoma_M_contig1990.6210.1				0	0	0	0	not_expressed
Dictyota dichotoma	prot_D-dichotoma_M_contig1992.6214.1	0.301509	0.225681	0.604083	7.81226	6.6847	2.60618	1.88731	unbiased
Dictyota dichotoma	prot_D-dichotoma_M_contig1993.6215.1	0.277879	0.322197	0.774572	4.66131	4.11383	1.34584	2.08195	unbiased
Dictyota dichotoma	prot_D-dichotoma_M_contig1997.6237.1	-0.0801836	0.206034	0.920949	38.7498	43.8483	7.83027	14.981	unbiased
Dictyota dichotoma	prot_D-dichotoma_M_contig1997.6238.1	0.0823642	0.320414	0.952347	5.32796	5.30074	2.02221	2.0149	unbiased
Dictyota dichotoma	prot_D-dichotoma_M_contig2649.9111.1	0.993749	1.81792	0.876331	0.542504	0.283538	0.979128	0.430169	not_expressed
Dictyota dichotoma	prot_D-dichotoma_M_contig2649.9112.1	-0.173312	0.471549	0.925522	22.8932	26.1776	14.63	15.7049	unbiased
Dictyota dichotoma	prot_D-dichotoma_M_contig2653.9143.1	-0.415228	0.365495	0.680416	9.45647	12.9712	3.20202	8.21875	unbiased
Dictyota dichotoma	prot_D-dichotoma_M_contig2653.9144.1	-0.328872	0.396203	0.787355	35.6319	47.8641	16.5257	26.765	unbiased
Dictyota dichotoma	prot_D-dichotoma_M_contig2659.9155.1	-1.21229	0.801119	0.537595	0.361293	0.895695	0.272443	0.588291	not_expressed
Dictyota dichotoma	prot_D-dichotoma_M_contig4199.13622.1	-0.146207	1.29119	0.983013	0.326063	0.374038	0.350407	0.347362	not_expressed
Dictyota dichotoma	prot_D-dichotoma_M_contig4201.13667.1	-0.0845818	0.487933	0.971725	9.69318	10.2939	5.90506	3.66787	unbiased
Dictyota dichotoma	prot_D-dichotoma_M_contig4204.13672.1	0.837903	3.25801		0.0352062	0	0.0754089	0	not_expressed
Dictyota dichotoma	prot_D-dichotoma_M_contig4213.13689.1	1.2972	0.810196	0.507974	0.900394	0.400829	0.594428	0.329645	not_expressed
Dictyota dichotoma	prot_D-dichotoma_M_contig4218.13695.1	-0.152024	0.381879	0.917953	8.5786	10.0379	3.94107	4.82182	unbiased
Dictyota dichotoma	prot_D-dichotoma_M_contig261.9008.1	0.00505943	0.515914	0.998747	145.04	146.555	124.157	101.621	unbiased
Dictyota dichotoma	prot_D-dichotoma_M_contig262.9036.1	-0.384232	0.13346	0.100294	26.8346	36.7846	5.43361	4.72097	unbiased
Dictyota dichotoma	prot_D-dichotoma_M_contig263.9056.1	2.79025	1.12689	0.187916	0.624836	0.0999804	0.583179	0.104029	not_expressed
Dictyota dichotoma	prot_D-dichotoma_M_contig2716.9386.1	1.59975	0.604497	0.146385	10.1571	3.61231	8.76772	1.95458	unbiased
Dictyota dichotoma	prot_D-dichotoma_M_contig2716.9385.1	1.48135	0.625304	0.21966	4.96893	1.81145	4.15008	1.53521	unbiased
Dictyota dichotoma	prot_D-dichotoma_M_contig2717.9387.1	3.50205	3.15504	0.688732	0.227189	0	0.45756	0	not_expressed
Dictyota dichotoma	prot_D-dichotoma_M_contig2717.9390.1	0.837903	3.25801		0.0261623	0	0.0827325	0	not_expressed
Dictyota dichotoma	prot_D-dichotoma_M_contig2722.9403.1	0.35209	0.750496	0.898951	0.553586	0.460235	0.233361	0.500348	not_expressed
Dictyota dichotoma	prot_D-dichotoma_M_contig2722.9404.1	-1.13562	0.802507	0.576545	0.581726	1.27307	0.414166	1.58426	unbiased
Dictyota dichotoma	prot_D-dichotoma_M_contig2724.9417.1	0.337603	0.405625	0.786103	3.80114	3.1816	1.5351	1.55074	unbiased
Dictyota dichotoma	prot_D-dichotoma_M_contig2725.9419.1	0.418175	2.11335	0.966811	0.969608	0.127468	2.52554	0.127048	not_expressed
Dictyota dichotoma	prot_D-dichotoma_M_contig161.4268.1	0.0545664	0.176832	0.940996	16.3975	16.8802	3.18453	3.87693	unbiased
Dictyota dichotoma	prot_D-dichotoma_M_contig162.4330.1	-0.209416	0.308767	0.835215	9.81879	11.6802	4.4593	4.10685	unbiased
Dictyota dichotoma	prot_D-dichotoma_M_contig162.4332.1	-1.15031	3.18249		0.0840801	0.183682	0.18779	0.410726	not_expressed
Dictyota dichotoma	prot_D-dichotoma_M_contig163.4393.1	-0.396984	0.485554	0.790434	3.11212	4.31979	1.90961	2.98858	unbiased
Dictyota dichotoma	prot_D-dichotoma_M_contig163.4394.1	-0.346442	0.21991	0.516256	16.8851	22.6376	5.6569	4.80433	unbiased
Dictyota dichotoma	prot_D-dichotoma_M_contig163.4404.1	1.99914	2.59608		0.0832746	0	0.0933263	0	not_expressed
Dictyota dichotoma	prot_D-dichotoma_M_contig1764.5092.1	0.296968	0.457597	0.843951	4.26691	3.62858	1.59627	2.7381	unbiased
Dictyota dichotoma	prot_D-dichotoma_M_contig1765.5096.1	1.01466	0.564377	0.426863	4.62029	2.46673	2.4746	1.56048	unbiased
Dictyota dichotoma	prot_D-dichotoma_M_contig1766.5101.1	0.775603	1.63892	0.897752	0.174817	0.107445	0.305346	0.119361	not_expressed
Dictyota dichotoma	prot_D-dichotoma_M_contig1767.5102.1	0.291939	0.650297	0.903873	2.35475	2.07105	2.18884	0.716011	unbiased
Dictyota dichotoma	prot_D-dichotoma_M_contig129.2207.1	-0.148392	0.969104	0.97628	0.458211	0.524777	0.377016	0.609866	not_expressed
Dictyota dichotoma	prot_D-dichotoma_M_contig129.2208.1	-0.162122	0.375906	0.908272	4.04609	4.82551	1.31549	2.54954	unbiased
Dictyota dichotoma	prot_D-dichotoma_M_contig129.2209.1	1.14154	1.5157	0.808901	0.576259	0.26038	1.07422	0.276762	not_expressed
Dictyota dichotoma	prot_D-dichotoma_M_contig129.2212.1	0.525285	0.574582	0.757232	1.89217	1.42121	0.95366	1.09032	unbiased
Dictyota dichotoma	prot_D-dichotoma_M_contig1043.450.1	0.735526	0.598839	0.645579	5.89317	3.94752	4.9113	1.58246	unbiased
Dictyota dichotoma	prot_D-dichotoma_M_contig1045.464.1	-0.272075	0.647641	0.911656	1.29985	1.6223	0.781015	1.15517	unbiased
Dictyota dichotoma	prot_D-dichotoma_M_contig1048.474.1	0.696341	0.941196	0.813984	0.474987	0.313254	0.373852	0.343979	not_expressed
Dictyota dichotoma	prot_D-dichotoma_M_contig1048.476.1	1.99043	1.89437		0.137558	0.027423	0.15173	0.0613197	not_expressed
Dictyota dichotoma	prot_D-dichotoma_M_contig943.20157.1	-0.430774	1.39517	0.940996	0.0995193	0.129937	0.0859103	0.179959	not_expressed
Dictyota dichotoma	prot_D-dichotoma_M_contig944.20165.1	5.88682	1.80388	0.0461626	10.4394	0.194587	23.7812	0.43511	GA_specific
Dictyota dichotoma	prot_D-dichotoma_M_contig945.20172.1	0.729318	0.686873	0.705844	1.46453	0.962218	1.73122	1.1414	unbiased
Dictyota dichotoma	prot_D-dichotoma_M_contig945.20176.1	0.645379	0.70149	0.754943	1.14376	0.800943	0.885824	0.663337	unbiased
Dictyota dichotoma	prot_D-dichotoma_M_contig946.20177.1	-0.475363	0.505122	0.747639	9.54434	13.6859	6.33213	9.75183	unbiased
Dictyota dichotoma	prot_D-dichotoma_M_contig946.20178.1	0.384588	0.632672	0.855498	3.92388	3.12604	2.56154	2.13702	unbiased
Dictyota dichotoma	prot_D-dichotoma_M_contig781.18648.1	-0.703242	0.607307	0.671056	1.84531	3.06138	1.91292	1.25459	unbiased
Dictyota dichotoma	prot_D-dichotoma_M_contig781.18654.1	1.52667	1.12809	0.596881	0.419119	0.164435	0.313429	0.222777	not_expressed
Dictyota dichotoma	prot_D-dichotoma_M_contig784.18674.1	-0.0784928	0.285045	0.947943	31.2113	34.1711	13.7178	11.3194	unbiased
Dictyota dichotoma	prot_D-dichotoma_M_contig785.18679.1	0.256214	0.440384	0.865008	25.8798	22.874	17.6314	14.0329	unbiased
Dictyota dichotoma	prot_D-dichotoma_M_contig471.14709.1	0.370561	0.712867	0.885457	6.91006	5.51378	6.64913	4.45469	unbiased
Dictyota dichotoma	prot_D-dichotoma_M_contig472.14728.1	0.0544994	0.409932	0.979954	3.65044	3.81009	1.52228	2.47657	unbiased
Dictyota dichotoma	prot_D-dichotoma_M_contig472.14729.1	0.0653911	0.440489	0.977541	4.75466	4.77375	2.85777	1.47743	unbiased
Dictyota dichotoma	prot_D-dichotoma_M_contig473.14748.1	2.05621	0.789931	0.156357	1.5973	0.40863	1.60255	0.269809	unbiased
Dictyota dichotoma	prot_D-dichotoma_M_contig473.14755.1	3.16441	2.27491	0.585084	0.55618	0.0647191	1.10474	0.144716	not_expressed
Dictyota dichotoma	prot_D-dichotoma_M_contig473.14759.1	-0.847648	0.530405	0.509064	2.86737	5.42375	2.8873	4.16789	unbiased
Dictyota dichotoma	prot_D-dichotoma_M_contig473.14760.1	-1.41346	0.655291	0.292176	1.82503	5.11541	1.90199	4.15685	unbiased
Dictyota dichotoma	prot_D-dichotoma_M_contig1255.1986.1	-0.46267	0.502717	0.754943	1.00583	1.43484	0.478181	0.915445	unbiased
Dictyota dichotoma	prot_D-dichotoma_M_contig1255.1988.1	-0.824805	0.395021	0.321418	8.41961	16.01	2.52553	12.7116	unbiased
Dictyota dichotoma	prot_D-dichotoma_M_contig1255.1990.1	1.26556	1.18407	0.704138	3.37443	1.52127	5.55128	2.06209	unbiased
Dictyota dichotoma	prot_D-dichotoma_M_contig1255.1996.1	2.49976	0.641935	0.00869497	13.5658	2.5313	12.1944	1.43249	GA_biased
Dictyota dichotoma	prot_D-dichotoma_M_contig1257.2006.1	-0.123824	0.566768	0.962836	2.90956	3.43404	1.05898	2.21299	unbiased
Dictyota dichotoma	prot_D-dichotoma_M_contig1258.2008.1	0.215786	0.501233	0.908405	17.7269	15.6992	9.80861	12.1402	unbiased
Dictyota dichotoma	prot_D-dichotoma_M_contig1258.2013.1	1.88526	0.662064	0.10537	17.5228	5.13154	19.0962	1.64365	unbiased
Dictyota dichotoma	prot_D-dichotoma_M_contig380.12636.1	2.3516	1.44122	0.494411	0.125336	0.0246266	0.0941721	0.0550666	not_expressed
Dictyota dichotoma	prot_D-dichotoma_M_contig380.12643.1	0.245586	0.635359	0.921354	0.763607	0.679471	0.483269	0.322532	not_expressed
Dictyota dichotoma	prot_D-dichotoma_M_contig634.17279.1	-0.314982	0.341029	0.75371	9.2433	11.9347	2.97218	5.88947	unbiased
Dictyota dichotoma	prot_D-dichotoma_M_contig219.7278.1	3.07927	2.30133	0.603139	0.0781882	0	0.0967064	0	not_expressed
Dictyota dichotoma	prot_D-dichotoma_M_contig220.7335.1	1.83119	1.62772	0.683884	3.44499	1.06525	6.02129	0.755942	unbiased
Dictyota dichotoma	prot_D-dichotoma_M_contig220.7337.1	4.08578	1.57048	0.156548	1.86405	0.113206	2.17812	0.138853	unbiased
Dictyota dichotoma	prot_D-dichotoma_M_contig220.7339.1	-1.03017	0.753937	0.593057	3.051	6.60046	3.17888	6.4323	unbiased
Dictyota dichotoma	prot_D-dichotoma_M_contig892.19688.1	0.281746	0.369485	0.80644	25.7163	22.7537	13.4676	6.70049	unbiased
Dictyota dichotoma	prot_D-dichotoma_M_contig892.19689.1	3.07875	1.75292	0.444237	0.324158	0.0313157	0.382102	0.0700241	not_expressed
Dictyota dichotoma	prot_D-dichotoma_M_contig892.19690.1	0.853798	1.30048	0.840774	0.616663	0.351367	0.834426	0.458222	not_expressed
Dictyota dichotoma	prot_D-dichotoma_M_contig893.19696.1	-0.471542	0.966838	0.893742	0.453934	0.721978	0.275128	0.99125	not_expressed
Dictyota dichotoma	prot_D-dichotoma_M_contig894.19699.1	-0.329066	0.377799	0.771692	6.11323	8.12106	1.9212	4.19072	unbiased
Dictyota dichotoma	prot_D-dichotoma_M_contig1460.3361.1	-0.35802	0.281622	0.629468	13.4808	18.6156	5.25889	7.82492	unbiased
Dictyota dichotoma	prot_D-dichotoma_M_contig1463.3372.1	-0.359078	0.264963	0.595896	4.59584	6.14871	1.70135	2.01206	unbiased
Dictyota dichotoma	prot_D-dichotoma_M_contig1473.3411.1	-0.210711	0.561061	0.923264	2.16351	2.63288	1.54392	1.58112	unbiased
Dictyota dichotoma	prot_D-dichotoma_M_contig149.3502.1	-0.683372	0.40705	0.474572	68.5875	113.246	34.018	65.0207	unbiased
Dictyota dichotoma	prot_D-dichotoma_M_contig149.3508.1	0.227288	0.445634	0.887528	5.7143	5.00573	3.4719	1.92261	unbiased
Dictyota dichotoma	prot_D-dichotoma_M_contig149.3515.1	-0.0957949	0.245922	0.920728	10.1948	11.4838	3.75778	3.35402	unbiased
Dictyota dichotoma	prot_D-dichotoma_M_contig149.3516.1	-0.34118	0.341468	0.727937	6.89226	9.30297	2.54528	4.42704	unbiased
Dictyota dichotoma	prot_D-dichotoma_M_contig149.3517.1	3.9966	1.6221	0.190499	0.469757	0	0.442129	0	not_expressed
Dictyota dichotoma	prot_D-dichotoma_M_contig150.3591.1	0.636366	0.452464	0.579843	1.62974	1.09038	0.837481	0.607902	unbiased
Dictyota dichotoma	prot_D-dichotoma_M_contig150.3593.1	-0.73696	0.420388	0.445395	4.41719	7.75865	2.4276	4.70817	unbiased
Dictyota dichotoma	prot_D-dichotoma_M_contig150.3600.1	-0.100763	0.269741	0.92377	9.40039	10.5274	3.8624	3.57413	unbiased
Dictyota dichotoma	prot_D-dichotoma_M_contig2756.9502.1	0.174563	0.309394	0.872274	26.5733	24.7066	7.59703	9.63462	unbiased
Dictyota dichotoma	prot_D-dichotoma_M_contig2757.9504.1	-0.411596	0.816759	0.888992	1.47207	1.92278	1.97255	1.33086	unbiased
Dictyota dichotoma	prot_D-dichotoma_M_contig2760.9518.1	0.557912	0.251201	0.27016	29.2585	21.3022	7.4133	6.03441	unbiased
Dictyota dichotoma	prot_D-dichotoma_M_contig2761.9519.1	-0.742869	0.436829	0.46562	13.5607	23.4174	9.26617	10.3827	unbiased
Dictyota dichotoma	prot_D-dichotoma_M_contig2763.9521.1	0.0730319	0.262308	0.94768	114.99	119.68	29.0179	36.2798	unbiased
Dictyota dichotoma	prot_D-dichotoma_M_contig2763.9522.1	1.45886	3.25601		0.075828	0	0.12985	0	not_expressed
Dictyota dichotoma	prot_D-dichotoma_M_contig2764.9524.1	0.555663	0.340888	0.494874	1.22634	0.854393	0.505347	0.292066	unbiased
Dictyota dichotoma	prot_D-dichotoma_M_contig2765.9525.1	1.10624	0.810636	0.593609	7.07535	3.53051	9.15286	3.07309	unbiased
Dictyota dichotoma	prot_D-dichotoma_M_contig2766.9530.1	-0.658447	0.323379	0.338431	17.4089	27.9592	7.91662	9.10582	unbiased
Dictyota dichotoma	prot_D-dichotoma_M_contig2768.9534.1	-0.759341	0.536539	0.576545	0.790791	1.45609	0.47787	1.07004	unbiased
Dictyota dichotoma	prot_D-dichotoma_M_contig95.20214.1	-1.01543	0.443101	0.243153	8.40874	17.8972	4.5974	9.31934	unbiased
Dictyota dichotoma	prot_D-dichotoma_M_contig95.20222.1	-0.521712	0.339498	0.528798	5.12883	7.81494	2.3498	3.59878	unbiased
Dictyota dichotoma	prot_D-dichotoma_M_contig96.20298.1	0.315242	0.204539	0.527592	38.7779	33.2929	8.36903	8.62332	unbiased
Dictyota dichotoma	prot_D-dichotoma_M_contig96.20316.1	-0.305429	0.457925	0.838738	2.42312	3.25229	1.88523	2.32826	unbiased
Dictyota dichotoma	prot_D-dichotoma_M_contig97.20381.1	0.00832009	0.276697	0.995538	10.7318	11.12	4.36257	2.2742	unbiased
Dictyota dichotoma	prot_D-dichotoma_M_contig97.20388.1	-0.579637	0.471945	0.645579	15.8905	24.0171	10.3473	11.6035	unbiased
Dictyota dichotoma	prot_D-dichotoma_M_contig97.20389.1	-0.299882	0.378924	0.797536	6.37003	8.31319	3.26259	4.88103	unbiased
Dictyota dichotoma	prot_D-dichotoma_M_contig3230.11154.1	0.264972	1.24497	0.96455	0.735473	0.590829	0.88966	1.0527	not_expressed
Dictyota dichotoma	prot_D-dichotoma_M_contig3234.11164.1	0.1702	0.223958	0.807101	9.12605	8.59485	2.3462	3.0053	unbiased
Dictyota dichotoma	prot_D-dichotoma_M_contig3240.11184.1				0	0	0	0	not_expressed
Dictyota dichotoma	prot_D-dichotoma_M_contig3245.11190.1	1.97972	2.77583	0.823528	0.213762	0.0611559	0.568839	0.136749	not_expressed
Dictyota dichotoma	prot_D-dichotoma_M_contig3245.11192.1	2.29915	0.875857	0.151032	1.27741	0.259427	1.61827	0.257729	unbiased
Dictyota dichotoma	prot_D-dichotoma_M_contig1806.5329.1	0.374936	0.287021	0.615223	363.48	290.442	122.691	112.83	unbiased
Dictyota dichotoma	prot_D-dichotoma_M_contig1807.5336.1	0.289412	0.349471	0.787928	110.274	99.6409	45.8334	44.9734	unbiased
Dictyota dichotoma	prot_D-dichotoma_M_contig1810.5362.1	-0.07351	0.449078	0.973735	45.6169	49.5208	24.7584	27.0438	unbiased
Dictyota dichotoma	prot_D-dichotoma_M_contig969.20376.1	1.1607	3.23393		0.0907765	0.0297936	0.179448	0.0666205	not_expressed
Dictyota dichotoma	prot_D-dichotoma_M_contig970.20401.1	-0.297794	0.248746	0.654903	9.33967	12.0588	3.31999	4.6044	unbiased
Dictyota dichotoma	prot_D-dichotoma_M_contig973.20421.1	0.135647	0.284817	0.897255	25.9273	25.3526	9.35305	10.4286	unbiased
Dictyota dichotoma	prot_D-dichotoma_M_contig973.20425.1	-0.140898	0.804858	0.971531	4.56794	4.8689	7.52864	4.07386	unbiased
Dictyota dichotoma	prot_D-dichotoma_M_contig467.14621.1	-0.798198	0.844315	0.746302	0.910885	1.77735	0.771585	1.13924	unbiased
Dictyota dichotoma	prot_D-dichotoma_M_contig468.14637.1	1.38948	1.00401	0.588597	1.98583	0.805497	2.7844	0.702667	unbiased
Dictyota dichotoma	prot_D-dichotoma_M_contig468.14638.1	1.17986	0.836404	0.578028	0.350444	0.163025	0.380209	0.128929	not_expressed
Dictyota dichotoma	prot_D-dichotoma_M_contig469.14653.1	0.34068	0.344689	0.732537	4.98167	4.10518	0.913065	2.41663	unbiased
Dictyota dichotoma	prot_D-dichotoma_M_contig469.14654.1	-0.194454	0.372417	0.88445	2.88699	3.44241	1.00412	1.86326	unbiased
Dictyota dichotoma	prot_D-dichotoma_M_contig110.874.1	0.0486765	0.321972	0.977041	23.0201	24.4741	6.96326	15.6714	unbiased
Dictyota dichotoma	prot_D-dichotoma_M_contig110.882.1	-0.322072	0.261998	0.644904	24.4994	32.6212	7.85137	13.9397	unbiased
Dictyota dichotoma	prot_D-dichotoma_M_contig110.885.1	-0.441904	0.747293	0.861063	0.824101	1.1831	0.521476	0.83328	unbiased
Dictyota dichotoma	prot_D-dichotoma_M_contig110.886.1	-0.0484296	0.376305	0.980522	42.1779	48.0713	22.3122	14.8898	unbiased
Dictyota dichotoma	prot_D-dichotoma_M_contig111.948.1	-1.0786	3.2228		0.0154414	0.0687892	0.0327828	0.112755	not_expressed
Dictyota dichotoma	prot_D-dichotoma_M_contig152.3689.1	-0.201586	0.256462	0.798839	21.5413	25.8705	5.93602	9.99173	unbiased
Dictyota dichotoma	prot_D-dichotoma_M_contig152.3690.1	-0.155575	0.222679	0.82745	35.1061	42.2177	8.58575	14.6696	unbiased
Dictyota dichotoma	prot_D-dichotoma_M_contig153.3763.1	-1.39049	0.496294	0.113813	6.50358	17.3579	4.68169	9.19525	unbiased
Dictyota dichotoma	prot_D-dichotoma_M_contig4497.14257.1	5.04205	1.24457	0.00536786	0.650322	0.0155763	0.432576	0.0348296	not_expressed
Dictyota dichotoma	prot_D-dichotoma_M_contig4501.14307.1	-0.329803	0.292055	0.682745	3.46132	4.59013	0.900564	1.63894	unbiased
Dictyota dichotoma	prot_D-dichotoma_M_contig4501.14308.1	-0.511364	0.658375	0.800772	1.12148	1.66026	1.09973	1.07114	unbiased
Dictyota dichotoma	prot_D-dichotoma_M_contig4502.14309.1	0.00936239	0.594249	0.997681	2.77289	2.77685	1.75504	1.71109	unbiased
Dictyota dichotoma	prot_D-dichotoma_M_contig4508.14312.1	0.551952	3.25789		0.0617722	0.0360561	0.195341	0.080624	not_expressed
Dictyota dichotoma	prot_D-dichotoma_M_contig4511.14335.1	0.250226	0.272588	0.755634	65.0663	57.542	17.4216	24.7167	unbiased
Dictyota dichotoma	prot_D-dichotoma_M_contig4513.14337.1	-0.396644	0.83555	0.897474	0.86165	1.21815	0.931342	0.625477	unbiased
Dictyota dichotoma	prot_D-dichotoma_M_contig398.13054.1				0	0	0	0	not_expressed
Dictyota dichotoma	prot_D-dichotoma_M_contig398.13061.1	-2.05468	1.05592	0.371926	0.206555	0.864229	0.239086	0.63926	not_expressed
Dictyota dichotoma	prot_D-dichotoma_M_contig400.13169.1	-0.534235	0.286554	0.402683	82.2942	122.427	35.8884	28.4536	unbiased
Dictyota dichotoma	prot_D-dichotoma_M_contig169.4701.1	0.166112	0.280981	0.861151	41.4633	39.5917	12.0354	11.1236	unbiased
Dictyota dichotoma	prot_D-dichotoma_M_contig169.4705.1	-0.330255	0.233438	0.576807	85.6744	113.457	20.5515	38.7638	unbiased
Dictyota dichotoma	prot_D-dichotoma_M_contig169.4709.1	0.44714	0.400397	0.687037	2.9763	2.32174	1.40223	1.52232	unbiased
Dictyota dichotoma	prot_D-dichotoma_M_contig170.4782.1	-0.316236	3.25801		0	0.0244879	0	0.0547566	not_expressed
Dictyota dichotoma	prot_D-dichotoma_M_contig324.11177.1	0.234276	0.585069	0.91746	2.76323	2.39461	1.38954	1.87755	unbiased
Dictyota dichotoma	prot_D-dichotoma_M_contig326.11215.1	-0.777212	0.327712	0.21896	6.4382	11.5847	3.29592	5.30102	unbiased
Dictyota dichotoma	prot_D-dichotoma_M_contig326.11220.1	-0.115694	0.213112	0.877671	11.069	12.7904	2.63227	4.42769	unbiased
Dictyota dichotoma	prot_D-dichotoma_M_contig1001.109.1	-0.0951005	1.60285	0.991798	0.169281	0.184525	0.325627	0.196185	not_expressed
Dictyota dichotoma	prot_D-dichotoma_M_contig1005.135.1	0.536514	0.281376	0.386375	10.4498	7.76278	3.217	2.00456	unbiased
Dictyota dichotoma	prot_D-dichotoma_M_contig1187.1491.1	0.60445	0.678028	0.764797	2.55505	1.67797	2.54257	0.379559	unbiased
Dictyota dichotoma	prot_D-dichotoma_M_contig1190.1540.1	0.531971	0.561688	0.745787	7.36455	5.2019	6.55531	3.8064	unbiased
Dictyota dichotoma	prot_D-dichotoma_M_contig1190.1541.1	0.639911	0.54709	0.666621	12.2496	7.99662	10.4117	5.55739	unbiased
Dictyota dichotoma	prot_D-dichotoma_M_contig216.7158.1	-0.00941845	1.0012	0.998747	0.367262	0.414827	0.451838	0.427296	not_expressed
Dictyota dichotoma	prot_D-dichotoma_M_contig217.7188.1	-0.122569	1.11204	0.983633	0.489706	0.544759	0.442038	0.438916	not_expressed
Dictyota dichotoma	prot_D-dichotoma_M_contig217.7191.1	-0.803744	0.268334	0.0809943	15.6576	28.9895	5.65724	13.7522	unbiased
Dictyota dichotoma	prot_D-dichotoma_M_contig218.7233.1				0	0	0	0	not_expressed
Dictyota dichotoma	prot_D-dichotoma_M_contig218.7236.1	-0.56695	0.501362	0.681759	2.07607	3.23953	1.28843	1.93661	unbiased
Dictyota dichotoma	prot_D-dichotoma_M_contig218.7239.1	0.628086	0.416898	0.540063	3.0016	2.00644	1.04025	1.53423	unbiased
Dictyota dichotoma	prot_D-dichotoma_M_contig218.7242.1	1.28871	0.542785	0.217975	36.8865	16.4633	24.9572	4.97073	unbiased
Dictyota dichotoma	prot_D-dichotoma_M_contig3774.12563.1	0.221498	0.928164	0.95694	2.26497	2.04696	2.75309	2.43041	unbiased
Dictyota dichotoma	prot_D-dichotoma_M_contig3781.12580.1	0.39946	0.33363	0.654903	37.2372	30.0383	11.245	14.1821	unbiased
Dictyota dichotoma	prot_D-dichotoma_M_contig3782.12582.1	-0.959886	1.5138	0.847719	0.547131	1.00602	0.784563	1.4506	unbiased
Dictyota dichotoma	prot_D-dichotoma_M_contig3786.12594.1	5.30578	1.52543	0.028282	0.402572	0.0104029	0.752509	0.0142543	not_expressed
Dictyota dichotoma	prot_D-dichotoma_M_contig72.18099.1	0.982517	0.4259	0.237697	59.4496	32.3897	36.5557	10.2738	unbiased
Dictyota dichotoma	prot_D-dichotoma_M_contig72.18100.1	0.837613	0.523831	0.5089	26.1388	16.0581	21.1141	6.85844	unbiased
Dictyota dichotoma	prot_D-dichotoma_M_contig73.18175.1	0.504899	0.546589	0.75371	5.14481	3.84785	2.42238	3.28152	unbiased
Dictyota dichotoma	prot_D-dichotoma_M_contig73.18176.1	-0.604768	3.25801		0.0105029	0.0442091	0.033213	0.0988546	not_expressed
Dictyota dichotoma	prot_D-dichotoma_M_contig73.18178.1	-0.692805	1.59925	0.907604	0.128175	0.20875	0.170776	0.23942	not_expressed
Dictyota dichotoma	prot_D-dichotoma_M_contig1105.925.1	0.820929	0.437787	0.399435	53.1339	33.773	30.7625	15.6551	unbiased
Dictyota dichotoma	prot_D-dichotoma_M_contig1109.938.1	-0.600553	0.593575	0.723039	1.16641	1.80517	0.796812	0.935611	unbiased
Dictyota dichotoma	prot_D-dichotoma_M_contig4990.15242.1	0.213188	0.390191	0.876331	12.3114	11.0033	7.15087	3.96282	unbiased
Dictyota dichotoma	prot_D-dichotoma_M_contig4994.15243.1	0.178682	0.768725	0.959348	2.56003	2.27489	2.21158	1.40607	unbiased
Dictyota dichotoma	prot_D-dichotoma_M_contig4994.15244.1	-0.130924	0.377901	0.931376	4.21128	4.88974	1.94036	2.14604	unbiased
Dictyota dichotoma	prot_D-dichotoma_M_contig4998.15245.1	-0.334421	0.998589	0.934743	0.283304	0.379419	0.326898	0.315413	not_expressed
Dictyota dichotoma	prot_D-dichotoma_M_contig5020.15360.1	-0.444281	0.570929	0.800538	3.15314	4.40441	1.53805	4.87089	unbiased
Dictyota dichotoma	prot_D-dichotoma_M_contig5020.15366.1	1.73792	0.562826	0.0677471	0.760865	0.24429	0.381056	0.197478	not_expressed
Dictyota dichotoma	prot_D-dichotoma_M_contig5027.15368.1	0.0811831	0.449835	0.970422	62.8776	61.6937	29.8102	46.324	unbiased
Dictyota dichotoma	prot_D-dichotoma_M_contig5027.15369.1	0.119881	0.405724	0.944465	125.848	119.344	60.7305	69.2102	unbiased
Dictyota dichotoma	prot_D-dichotoma_M_contig1951.6019.1	-0.448934	0.54355	0.788755	0.922281	1.34448	0.530485	0.708395	unbiased
Dictyota dichotoma	prot_D-dichotoma_M_contig1953.6024.1	-0.567895	0.300673	0.392699	70.477	113.124	23.6712	43.6396	unbiased
Dictyota dichotoma	prot_D-dichotoma_M_contig1953.6026.1	-2.04385	1.01687	0.348404	0.217487	0.936054	0.244757	0.738332	not_expressed
Dictyota dichotoma	prot_D-dichotoma_M_contig1953.6030.1	-0.287294	0.7911	0.926937	0.599917	0.791864	0.525156	0.236823	not_expressed
Dictyota dichotoma	prot_D-dichotoma_M_contig1955.6033.1	1.65119	1.40006	0.66167	0.241282	0.0830428	0.237787	0.0759216	not_expressed
Dictyota dichotoma	prot_D-dichotoma_M_contig1956.6036.1	-0.202989	0.765562	0.950814	3.93518	4.7074	3.84463	2.67928	unbiased
Dictyota dichotoma	prot_D-dichotoma_M_contig1957.6038.1	-0.46968	0.563847	0.785753	7.77258	11.5564	8.37528	9.74733	unbiased
Dictyota dichotoma	prot_D-dichotoma_M_contig1958.6039.1	2.33235	1.32567	0.442958	0.220983	0.0454779	0.333746	0.0623616	not_expressed
Dictyota dichotoma	prot_D-dichotoma_M_contig241.8251.1	1.12902	3.25789		0.0343847	0	0.108734	0	not_expressed
Dictyota dichotoma	prot_D-dichotoma_M_contig241.8252.1	1.0202	0.902699	0.682291	1.78587	0.910758	2.14033	0.818623	unbiased
Dictyota dichotoma	prot_D-dichotoma_M_contig241.8253.1	0.305127	0.167982	0.421229	241.31	206.456	30.3313	48.9729	unbiased
Dictyota dichotoma	prot_D-dichotoma_M_contig242.8292.1	-0.0532853	0.516201	0.984667	6.30135	6.86217	4.5967	4.23081	unbiased
Dictyota dichotoma	prot_D-dichotoma_M_contig243.8321.1	-0.38953	0.231362	0.473259	24.8574	34.2297	6.74299	9.79296	unbiased
Dictyota dichotoma	prot_D-dichotoma_M_contig2771.9549.1				0	0	0	0	not_expressed
Dictyota dichotoma	prot_D-dichotoma_M_contig2771.9550.1	2.61665	3.22918		0.0942527	0	0.155584	0	not_expressed
Dictyota dichotoma	prot_D-dichotoma_M_contig2773.9555.1	0.837903	3.25801		0.0438243	0	0.0924407	0	not_expressed
Dictyota dichotoma	prot_D-dichotoma_M_contig2774.9557.1	0.718213	2.41033	0.943271	0.409765	0.0353964	1.13156	0.0580198	not_expressed
Dictyota dichotoma	prot_D-dichotoma_M_contig2776.9561.1	1.3549	0.79632	0.465551	2.3545	0.936476	3.59513	0.54122	unbiased
Dictyota dichotoma	prot_D-dichotoma_M_contig2776.9562.1	0.0871203	0.502979	0.971725	6.47286	6.20769	4.71803	3.48645	unbiased
Dictyota dichotoma	prot_D-dichotoma_M_contig1697.4745.1	-0.542468	0.353081	0.528798	12.9165	19.2375	6.59799	1.59845	unbiased
Dictyota dichotoma	prot_D-dichotoma_M_contig1697.4748.1	0.837903	3.25801		0.0363731	0	0.0772217	0	not_expressed
Dictyota dichotoma	prot_D-dichotoma_M_contig1698.4749.1	-0.223309	0.292393	0.806046	6.3169	7.66515	2.07114	3.27281	unbiased
Dictyota dichotoma	prot_D-dichotoma_M_contig1698.4751.1	-0.116145	0.302369	0.922024	14.6642	16.5283	4.78731	6.99964	unbiased
Dictyota dichotoma	prot_D-dichotoma_M_contig1700.4785.1	0.123893	0.249569	0.891112	31.0806	30.1408	9.07552	9.07915	unbiased
Dictyota dichotoma	prot_D-dichotoma_M_contig1701.4792.1	-0.199075	0.212513	0.749697	47.9141	57.7602	13.5026	10.8528	unbiased
Dictyota dichotoma	prot_D-dichotoma_M_contig1701.4793.1	-0.304949	0.352135	0.774141	70.2858	87.9666	33.357	31.7002	unbiased
Dictyota dichotoma	prot_D-dichotoma_M_contig1702.4795.1	1.35191	3.25686		0.0624929	0	0.103213	0	not_expressed
Dictyota dichotoma	prot_D-dichotoma_M_contig1236.1871.1	0.859433	0.685807	0.637795	3.89401	2.21273	2.44413	1.97317	unbiased
Dictyota dichotoma	prot_D-dichotoma_M_contig1237.1874.1	0.510288	1.35226	0.923259	4.62036	3.56927	7.4218	5.36147	unbiased
Dictyota dichotoma	prot_D-dichotoma_M_contig1237.1875.1	0.266236	0.572295	0.899489	1.62421	1.42652	0.692175	1.03877	unbiased
Dictyota dichotoma	prot_D-dichotoma_M_contig1237.1877.1	1.10472	1.39539	0.797536	0.567736	0.320747	0.998285	0.572128	not_expressed
Dictyota dichotoma	prot_D-dichotoma_M_contig1237.1878.1	0.269588	0.705776	0.922113	2.75283	2.37584	2.02154	1.58686	unbiased
Dictyota dichotoma	prot_D-dichotoma_M_contig1237.1879.1	-0.0186249	0.188889	0.984941	26.841	28.8315	6.16737	8.8681	unbiased
Dictyota dichotoma	prot_D-dichotoma_M_contig1238.1881.1	-0.273637	0.316936	0.774462	2.91251	3.6836	1.47498	1.36178	unbiased
Dictyota dichotoma	prot_D-dichotoma_M_contig1238.1884.1	-0.262956	0.518019	0.8877	1.52384	1.89636	1.07324	0.886243	unbiased
Dictyota dichotoma	prot_D-dichotoma_M_contig1239.1889.1	0.686136	1.02455	0.838519	0.757095	0.518919	0.490258	0.876704	not_expressed
Dictyota dichotoma	prot_D-dichotoma_M_contig1239.1890.1	-0.639939	0.219889	0.0942049	113.134	187.272	28.4595	76.7263	unbiased
Dictyota dichotoma	prot_D-dichotoma_M_contig1240.1908.1	-0.201233	0.312286	0.845524	8.47042	9.88998	3.30307	4.48384	unbiased
Dictyota dichotoma	prot_D-dichotoma_M_contig1240.1909.1	0.125078	1.16269	0.984041	0.836686	0.789326	0.972103	0.912263	not_expressed
Dictyota dichotoma	prot_D-dichotoma_M_contig457.14437.1	0.912666	1.46952	0.851434	0.224408	0.123179	0.245559	0.213013	not_expressed
Dictyota dichotoma	prot_D-dichotoma_M_contig457.14438.1	-0.635445	0.8532	0.812829	0.854483	1.38882	0.947159	0.94076	unbiased
Dictyota dichotoma	prot_D-dichotoma_M_contig457.14440.1	0.430754	0.706666	0.855353	0.833731	0.601248	0.67369	0.478445	not_expressed
Dictyota dichotoma	prot_D-dichotoma_M_contig458.14458.1	0.283637	0.197556	0.568264	6.54799	5.87343	0.881072	2.49415	unbiased
Dictyota dichotoma	prot_D-dichotoma_M_contig459.14475.1	0.648146	0.302989	0.299663	87.5361	60.1681	27.8664	15.1854	unbiased
Dictyota dichotoma	prot_D-dichotoma_M_contig459.14476.1	0.70582	0.455363	0.52424	39.8283	27.3999	20.5591	18.601	unbiased
Dictyota dichotoma	prot_D-dichotoma_M_contig459.14478.1	0.471352	0.240231	0.366943	29.8362	22.9214	8.95543	3.98534	unbiased
Dictyota dichotoma	prot_D-dichotoma_M_contig4561.14417.1	-0.233329	0.228951	0.720713	11.4267	14.4089	2.88728	4.3044	unbiased
Dictyota dichotoma	prot_D-dichotoma_M_contig4562.14418.1	0.954491	0.470208	0.340798	13.8029	7.53572	7.94093	4.01474	unbiased
Dictyota dichotoma	prot_D-dichotoma_M_contig4569.14421.1	-0.882445	1.1395	0.801154	0.225572	0.420851	0.208646	0.469337	not_expressed
Dictyota dichotoma	prot_D-dichotoma_M_contig4574.14444.1				0	0	0	0	not_expressed
Dictyota dichotoma	prot_D-dichotoma_M_contig4575.14445.1	2.02927	1.08953	0.403375	0.519036	0.133693	0.524865	0.128566	not_expressed
Dictyota dichotoma	prot_D-dichotoma_M_contig4575.14447.1	-0.746134	0.451243	0.48408	8.67736	15.1877	5.70391	7.729	unbiased
Dictyota dichotoma	prot_D-dichotoma_M_contig4581.14464.1	-0.771123	0.283707	0.130882	11.6351	20.6647	4.34188	7.57842	unbiased
Dictyota dichotoma	prot_D-dichotoma_M_contig4589.14469.1				0	0	0	0	not_expressed
Dictyota dichotoma	prot_D-dichotoma_M_contig91.19826.1	-3.23004	3.15995		0	0.260112	0	0.371155	not_expressed
Dictyota dichotoma	prot_D-dichotoma_M_contig91.19833.1	0.757681	0.500104	0.537595	59.3211	38.97	43.748	20.5422	unbiased
Dictyota dichotoma	prot_D-dichotoma_M_contig91.19842.1	-0.510865	0.264	0.376609	16.7146	25.4828	4.33001	10.5215	unbiased
Dictyota dichotoma	prot_D-dichotoma_M_contig92.19925.1	0.153327	0.195175	0.799145	56.9	55.4636	9.53461	13.6377	unbiased
Dictyota dichotoma	prot_D-dichotoma_M_contig92.19939.1	-0.912473	0.65625	0.585084	1.51257	2.97507	1.25471	2.02477	unbiased
Dictyota dichotoma	prot_D-dichotoma_M_contig112.1027.1	4.58382	1.51224	0.0748879	0.842955	0.0395079	1.36912	0.0687841	not_expressed
Dictyota dichotoma	prot_D-dichotoma_M_contig113.1082.1	0.608505	1.33385	0.902369	0.52963	0.34454	0.562642	0.64992	not_expressed
Dictyota dichotoma	prot_D-dichotoma_M_contig2901.10041.1	0.0866361	0.181346	0.896769	41.0958	41.183	8.91887	9.71286	unbiased
Dictyota dichotoma	prot_D-dichotoma_M_contig2901.10042.1	1.38083	1.30265	0.706037	1.37339	0.258526	2.5406	0.377612	unbiased
Dictyota dichotoma	prot_D-dichotoma_M_contig2901.10046.1	2.86647	2.08268	0.590411	1.07256	0.0514396	2.31567	0.115022	unbiased
Dictyota dichotoma	prot_D-dichotoma_M_contig2911.10077.1	-0.0520976	0.399893	0.980522	21.2227	24.2839	12.5215	14.1531	unbiased
Dictyota dichotoma	prot_D-dichotoma_M_contig2911.10078.1	-0.215192	0.430671	0.890288	4.23222	5.49505	2.80175	2.72506	unbiased
Dictyota dichotoma	prot_D-dichotoma_M_contig2912.10083.1	0.765967	0.438251	0.44698	15.9815	9.89491	7.96939	6.38941	unbiased
Dictyota dichotoma	prot_D-dichotoma_M_contig1145.1207.1	-0.0978368	0.261948	0.92377	9.75812	11.1968	2.76884	4.52249	unbiased
Dictyota dichotoma	prot_D-dichotoma_M_contig1146.1209.1	0.32769	0.41489	0.797766	4.58087	3.82966	2.59519	2.04441	unbiased
Dictyota dichotoma	prot_D-dichotoma_M_contig1146.1211.1	0.1853	0.459423	0.916957	6.78418	6.19953	4.28975	3.02356	unbiased
Dictyota dichotoma	prot_D-dichotoma_M_contig1147.1215.1	-1.37563	1.46861	0.749697	0.202401	0.560522	0.253354	0.593205	not_expressed
Dictyota dichotoma	prot_D-dichotoma_M_contig1148.1217.1	0.206274	0.187057	0.690922	8.91804	8.29561	1.96611	2.30053	unbiased
Dictyota dichotoma	prot_D-dichotoma_M_contig1150.1245.1	0.0786131	0.387897	0.966195	7.47131	7.35339	2.83296	3.75429	unbiased
Dictyota dichotoma	prot_D-dichotoma_M_contig1060.571.1	0.4906	1.87246	0.951215	0.188709	0.129438	0.262678	0.289433	not_expressed
Dictyota dichotoma	prot_D-dichotoma_M_contig1060.575.1	-0.33783	0.390433	0.774462	0.913458	1.25518	0.35401	0.60513	unbiased
Dictyota dichotoma	prot_D-dichotoma_M_contig1061.584.1	0.610659	0.532662	0.675656	231.092	171.243	187.273	79.8289	unbiased
Dictyota dichotoma	prot_D-dichotoma_M_contig1061.585.1	-0.0561104	0.348481	0.974358	17.9195	18.8557	8.85957	4.37556	unbiased
Dictyota dichotoma	prot_D-dichotoma_M_contig1062.591.1	-0.064039	0.313885	0.965982	10.4431	11.6623	2.62211	5.33479	unbiased
Dictyota dichotoma	prot_D-dichotoma_M_contig1063.597.1	-0.130295	0.680442	0.968125	22.3945	23.1555	20.8878	22.2635	unbiased
Dictyota dichotoma	prot_D-dichotoma_M_contig1217.1748.1	-0.609905	0.490653	0.639623	2.27028	3.71134	1.62744	2.67944	unbiased
Dictyota dichotoma	prot_D-dichotoma_M_contig1217.1749.1	-0.303732	0.586277	0.885945	1.91469	2.4948	1.60663	1.42461	unbiased
Dictyota dichotoma	prot_D-dichotoma_M_contig1217.1750.1	-0.273968	0.474622	0.867006	2.77195	3.57206	2.00647	1.65917	unbiased
Dictyota dichotoma	prot_D-dichotoma_M_contig2164.7170.1	0.756712	1.90613		0.15025	0.100195	0.208777	0.147642	not_expressed
Dictyota dichotoma	prot_D-dichotoma_M_contig2165.7175.1				0	0	0	0	not_expressed
Dictyota dichotoma	prot_D-dichotoma_M_contig2169.7184.1	1.61694	0.769599	0.31616	4.7525	1.74755	4.91814	2.59294	unbiased
Dictyota dichotoma	prot_D-dichotoma_M_contig232.7862.1	0.371248	1.25821	0.944668	0.355423	0.287183	0.450413	0.240259	not_expressed
Dictyota dichotoma	prot_D-dichotoma_M_contig233.7898.1	0.795966	0.69246	0.675053	4.56193	2.94474	4.13933	2.0405	unbiased
Dictyota dichotoma	prot_D-dichotoma_M_contig233.7899.1	-0.32972	0.190109	0.450817	9.51521	12.6371	3.05176	3.42181	unbiased
Dictyota dichotoma	prot_D-dichotoma_M_contig181.5353.1	0.0398254	0.48891	0.989474	6.81736	6.93339	5.10437	3.70745	unbiased
Dictyota dichotoma	prot_D-dichotoma_M_contig182.5388.1	0.103307	0.331146	0.940224	8.04012	7.78578	3.32208	2.76099	unbiased
Dictyota dichotoma	prot_D-dichotoma_M_contig183.5426.1	-1.63829	0.673895	0.201423	0.656418	2.09414	0.652708	1.1565	unbiased
Dictyota dichotoma	prot_D-dichotoma_M_contig183.5427.1	-1.19601	0.579248	0.328569	4.02938	9.52478	3.82664	6.21876	unbiased
Dictyota dichotoma	prot_D-dichotoma_M_contig183.5429.1	-0.554501	0.467962	0.660302	0.7968	1.23742	0.51071	0.431978	unbiased
Dictyota dichotoma	prot_D-dichotoma_M_contig2378.8090.1	-0.741782	0.661333	0.685288	3.07484	5.57008	2.33398	4.60054	unbiased
Dictyota dichotoma	prot_D-dichotoma_M_contig2378.8091.1	-0.602954	0.460172	0.613075	0.912543	1.47051	0.512723	0.746508	unbiased
Dictyota dichotoma	prot_D-dichotoma_M_contig2378.8092.1	-0.826636	0.386549	0.299729	2.43982	4.58508	1.03089	1.87996	unbiased
Dictyota dichotoma	prot_D-dichotoma_M_contig2379.8097.1	0.61892	0.281522	0.278614	6.14931	4.12583	1.93104	1.62149	unbiased
Dictyota dichotoma	prot_D-dichotoma_M_contig2379.8098.1	0.435261	0.604186	0.821095	4.82087	3.6261	4.0959	1.84818	unbiased
Dictyota dichotoma	prot_D-dichotoma_M_contig2379.8099.1	0.203322	0.497666	0.915415	6.08957	5.40873	4.59275	2.07683	unbiased
Dictyota dichotoma	prot_D-dichotoma_M_contig2382.8120.1	-0.238019	0.226665	0.710171	18.1406	22.6173	5.32816	7.67425	unbiased
Dictyota dichotoma	prot_D-dichotoma_M_contig2387.8139.1	4.001	2.09059	0.384621	0.231416	0	0.260784	0	not_expressed
Dictyota dichotoma	prot_D-dichotoma_M_contig2234.7464.1	-0.6775	0.375182	0.424229	3.16663	5.15973	1.92407	1.34947	unbiased
Dictyota dichotoma	prot_D-dichotoma_M_contig2237.7473.1	0.0436418	0.387652	0.983013	6.08334	6.22791	3.56689	2.44927	unbiased
Dictyota dichotoma	prot_D-dichotoma_M_contig2237.7474.1	-0.139189	0.373323	0.924081	10.6361	12.0629	5.87413	3.72223	unbiased
Dictyota dichotoma	prot_D-dichotoma_M_contig2237.7475.1	1.14478	0.967952	0.661412	4.96179	2.19552	4.14502	2.54666	unbiased
Dictyota dichotoma	prot_D-dichotoma_M_contig189.5699.1	-0.153651	0.561303	0.948563	6.55432	7.44763	4.21082	3.48292	unbiased
Dictyota dichotoma	prot_D-dichotoma_M_contig190.5767.1	-0.755997	0.567882	0.606489	1.24929	2.19033	0.776304	1.14874	unbiased
Dictyota dichotoma	prot_D-dichotoma_M_contig190.5770.1	1.55412	1.41792	0.692498	0.821927	0.29065	1.00456	0.587913	not_expressed
Dictyota dichotoma	prot_D-dichotoma_M_contig190.5771.1	0.260835	3.25801		0.0268059	0.024157	0.0570272	0.0540166	not_expressed
Dictyota dichotoma	prot_D-dichotoma_M_contig191.5817.1	3.84083	2.09561	0.414233	0.745785	0.0255847	1.48555	0.0419371	not_expressed
Dictyota dichotoma	prot_D-dichotoma_M_contig191.5825.1	0.204171	0.42135	0.894441	1.81171	1.66695	0.960931	0.39947	unbiased
Dictyota dichotoma	prot_D-dichotoma_M_contig191.5826.1	0.257998	0.21231	0.649456	3.07276	2.69881	1.04953	0.523128	unbiased
Dictyota dichotoma	prot_D-dichotoma_M_contig191.5831.1	4.04167	1.80099	0.261265	0.697859	0.0416972	1.20549	0.0932378	not_expressed
Dictyota dichotoma	prot_D-dichotoma_M_contig46.14502.1	-0.21567	0.322309	0.838721	3.52679	4.23427	1.90242	1.15908	unbiased
Dictyota dichotoma	prot_D-dichotoma_M_contig46.14503.1	-0.3628	0.270306	0.602032	8.54703	11.5815	3.22927	4.60526	unbiased
Dictyota dichotoma	prot_D-dichotoma_M_contig47.14662.1	-1.10929	1.24224	0.764546	0.17636	0.391127	0.101015	0.640559	not_expressed
Dictyota dichotoma	prot_D-dichotoma_M_contig47.14663.1	-0.739904	0.538729	0.590984	15.6394	26.8498	9.50643	22.2342	unbiased
Dictyota dichotoma	prot_D-dichotoma_M_contig47.14671.1	1.09371	0.812532	0.600354	3.28368	1.59124	2.78842	1.79139	unbiased
Dictyota dichotoma	prot_D-dichotoma_M_contig47.14674.1	1.19557	3.17591		0.0839412	0.0277982	0.147316	0.0621586	not_expressed
Dictyota dichotoma	prot_D-dichotoma_M_contig47.14676.1	-0.258993	1.39593	0.969805	0.712295	0.946136	1.28689	1.68194	not_expressed
Dictyota dichotoma	prot_D-dichotoma_M_contig47.14678.1	1.40005	1.15594	0.650151	1.95385	0.826235	2.80459	1.10145	unbiased
Dictyota dichotoma	prot_D-dichotoma_M_contig2108.6895.1	-0.00184481	0.232698	0.998747	17.6513	18.735	5.54367	6.15331	unbiased
Dictyota dichotoma	prot_D-dichotoma_M_contig2114.6930.1	-1.21625	0.409497	0.0842684	4.68169	11.6759	2.84417	2.84834	unbiased
Dictyota dichotoma	prot_D-dichotoma_M_contig2116.6937.1	0.251101	0.349935	0.821558	32.9135	29.5075	11.1524	13.655	unbiased
Dictyota dichotoma	prot_D-dichotoma_M_contig2117.6938.1	0.0365551	0.287114	0.980597	33.3278	33.6629	16.0145	9.71648	unbiased
Dictyota dichotoma	prot_D-dichotoma_M_contig2117.6939.1	-0.869236	0.710293	0.646849	16.492	32.1748	19.2393	27.1965	unbiased
Dictyota dichotoma	prot_D-dichotoma_M_contig1666.4599.1	0.441978	0.333518	0.60781	38.1748	30.07	13.8153	7.35055	unbiased
Dictyota dichotoma	prot_D-dichotoma_M_contig553.16206.1	1.12431	3.25791		0.0544402	0	0.0901699	0	not_expressed
Dictyota dichotoma	prot_D-dichotoma_M_contig554.16227.1	2.10358	1.11418	0.393204	2.58249	0.639146	5.15804	0.739366	unbiased
Dictyota dichotoma	prot_D-dichotoma_M_contig554.16228.1	0.342174	1.13313	0.942827	1.49635	0.276515	3.66182	0.243091	unbiased
Dictyota dichotoma	prot_D-dichotoma_M_contig555.16234.1	0.231804	0.365253	0.847719	0.756737	0.67817	0.365196	0.228377	not_expressed
Dictyota dichotoma	prot_D-dichotoma_M_contig767.18524.1	-0.629047	0.329953	0.386484	4.69856	7.63551	1.70359	3.06029	unbiased
Dictyota dichotoma	prot_D-dichotoma_M_contig768.18528.1	-1.69188	1.93094	0.76964	0.0372121	0.119598	0.0529805	0.200906	not_expressed
Dictyota dichotoma	prot_D-dichotoma_M_contig768.18529.1	-3.7183	3.15071	0.66167	0	0.227633	0	0.418989	not_expressed
Dictyota dichotoma	prot_D-dichotoma_M_contig768.18530.1	0.370676	1.0346	0.928424	0.703846	0.55905	0.700697	0.548692	not_expressed
Dictyota dichotoma	prot_D-dichotoma_M_contig768.18531.1	0.0314061	0.894776	0.994818	0.48264	0.510912	0.414225	0.619608	not_expressed
Dictyota dichotoma	prot_D-dichotoma_M_contig768.18532.1	-0.469788	1.32284	0.929184	0.334112	0.511036	0.389193	0.684344	not_expressed
Dictyota dichotoma	prot_D-dichotoma_M_contig768.18535.1	-0.451333	0.406227	0.688517	3.19857	4.67428	1.17802	3.40195	unbiased
Dictyota dichotoma	prot_D-dichotoma_M_contig771.18571.1	-0.254251	0.399094	0.8474	94.7687	115.847	47.0896	67.877	unbiased
Dictyota dichotoma	prot_D-dichotoma_M_contig771.18576.1	0.167146	0.238003	0.82745	78.5466	74.1863	20.4531	18.2585	unbiased
Dictyota dichotoma	prot_D-dichotoma_M_contig5173.15621.1	-0.893304	3.25801		0	0.0590039	0	0.0808484	not_expressed
Dictyota dichotoma	prot_D-dichotoma_M_contig5207.15689.1	-0.364413	0.56229	0.84417	5.92653	7.66319	3.92819	2.61797	unbiased
Dictyota dichotoma	prot_D-dichotoma_M_contig5212.15697.1	1.35826	2.0133	0.836967	1.67261	0.692518	2.85558	0.910509	unbiased
Dictyota dichotoma	prot_D-dichotoma_M_contig1546.3843.1	2.16331	0.60166	0.0201276	3.06699	0.696933	2.15352	0.410986	GA_specific
Dictyota dichotoma	prot_D-dichotoma_M_contig1547.3846.1	1.90252	1.10063	0.453645	2.10379	0.575846	3.52544	0.501401	unbiased
Dictyota dichotoma	prot_D-dichotoma_M_contig1549.3854.1	1.47959	0.891116	0.481804	1.1254	0.418431	1.22053	0.507841	unbiased
Dictyota dichotoma	prot_D-dichotoma_M_contig1551.3876.1	0.668164	0.69461	0.742196	0.86638	0.561636	0.937999	0.315925	not_expressed
Dictyota dichotoma	prot_D-dichotoma_M_contig1551.3878.1	0.488948	0.849268	0.867576	0.881127	0.664402	0.863684	0.470122	not_expressed
Dictyota dichotoma	prot_D-dichotoma_M_contig295.10184.1	0.260835	3.25801		0.0168487	0.0154105	0.0532801	0.0344589	not_expressed
Dictyota dichotoma	prot_D-dichotoma_M_contig295.10186.1	0.064843	0.121523	0.880347	28.3202	28.6797	5.48358	6.49962	unbiased
Dictyota dichotoma	prot_D-dichotoma_M_contig295.10189.1	-0.0137236	0.206657	0.990972	22.3266	24.2246	4.68514	6.64981	unbiased
Dictyota dichotoma	prot_D-dichotoma_M_contig671.17632.1	-0.0707308	0.234897	0.942828	32.2017	36.1648	8.89179	13.4057	unbiased
Dictyota dichotoma	prot_D-dichotoma_M_contig671.17634.1	0.845478	0.496341	0.464694	124.342	76.8018	90.0847	35.4318	unbiased
Dictyota dichotoma	prot_D-dichotoma_M_contig671.17636.1	-0.249812	0.181337	0.58996	25.7208	32.5476	5.74578	11.3271	unbiased
Dictyota dichotoma	prot_D-dichotoma_M_contig672.17639.1	0.837903	3.25801		0.0262853	0	0.0561271	0	not_expressed
Dictyota dichotoma	prot_D-dichotoma_M_contig672.17640.1	0.260835	3.25801		0.0190068	0.0152788	0.0601048	0.0341644	not_expressed
Dictyota dichotoma	prot_D-dichotoma_M_contig673.17644.1	2.3404	0.951791	0.191649	1.05088	0.236065	1.73378	0.285358	unbiased
Dictyota dichotoma	prot_D-dichotoma_M_contig3697.12396.1	-0.694391	0.545093	0.628972	1.01879	1.70656	0.732425	0.822875	unbiased
Dictyota dichotoma	prot_D-dichotoma_M_contig3717.12453.1	0.82056	0.618415	0.607517	3.17885	1.87654	1.92309	1.75383	unbiased
Dictyota dichotoma	prot_D-dichotoma_M_contig3342.11464.1	-0.21876	0.545516	0.91738	2.18208	2.64502	1.07725	1.57539	unbiased
Dictyota dichotoma	prot_D-dichotoma_M_contig3342.11467.1	-0.0611498	0.316222	0.967864	37.6599	43.28	8.21847	26.9957	unbiased
Dictyota dichotoma	prot_D-dichotoma_M_contig3343.11470.1	-1.32425	1.28157	0.71443	0.588867	1.62414	0.866831	1.11048	unbiased
Dictyota dichotoma	prot_D-dichotoma_M_contig3344.11471.1	3.44451	2.28085	0.539398	0.362132	0	0.483002	0	not_expressed
Dictyota dichotoma	prot_D-dichotoma_M_contig3347.11473.1	1.26143	1.96021	0.845766	0.409379	0.180445	0.645849	0.247435	not_expressed
Dictyota dichotoma	prot_D-dichotoma_M_contig3347.11474.1	0.320173	0.98149	0.936073	0.395502	0.331186	0.336709	0.315876	not_expressed
Dictyota dichotoma	prot_D-dichotoma_M_contig3350.11488.1	-1.23885	1.20561	0.717514	0.192496	0.493737	0.260987	0.426592	not_expressed
Dictyota dichotoma	prot_D-dichotoma_M_contig3351.11489.1	-0.814883	1.16348	0.82745	0.354048	0.67898	0.40787	1.02774	not_expressed
Dictyota dichotoma	prot_D-dichotoma_M_contig3357.11500.1	4.06622	1.73934	0.227942	0.293988	0	0.4627	0	not_expressed
Dictyota dichotoma	prot_D-dichotoma_M_contig3358.11501.1				0	0	0	0	not_expressed
Dictyota dichotoma	prot_D-dichotoma_M_contig355.11986.1	0.291065	0.209374	0.585084	13.8259	11.8425	3.48239	2.05566	unbiased
Dictyota dichotoma	prot_D-dichotoma_M_contig355.11992.1	-2.05575	1.30029	0.513836	0.338312	1.29408	0.527807	1.87908	unbiased
Dictyota dichotoma	prot_D-dichotoma_M_contig356.12013.1	2.9009	1.0208	0.106313	0.899093	0.137207	0.858921	0.171274	not_expressed
Dictyota dichotoma	prot_D-dichotoma_M_contig356.12014.1	0.706768	0.527886	0.602952	6.59643	4.14633	4.60537	2.16086	unbiased
Dictyota dichotoma	prot_D-dichotoma_M_contig1006.139.1	1.00043	0.679846	0.553587	4.30088	2.26064	3.80879	2.27303	unbiased
Dictyota dichotoma	prot_D-dichotoma_M_contig1007.144.1	-0.0992953	1.8322		0.0645112	0.0763076	0.0889805	0.0928815	not_expressed
Dictyota dichotoma	prot_D-dichotoma_M_contig1010.176.1	2.33867	0.998044	0.226037	5.32235	1.15612	8.8587	1.52013	unbiased
Dictyota dichotoma	prot_D-dichotoma_M_contig1011.188.1	-0.24571	0.310158	0.797536	1642.78	2042.18	829.742	411.705	unbiased
Dictyota dichotoma	prot_D-dichotoma_M_contig1714.4858.1	-0.823574	0.731337	0.683496	3.35504	6.20554	4.35804	4.94562	unbiased
Dictyota dichotoma	prot_D-dichotoma_M_contig1715.4865.1	0.00924541	0.243146	0.994112	12.5606	13.0978	4.48322	4.29981	unbiased
Dictyota dichotoma	prot_D-dichotoma_M_contig1716.4867.1	-0.592365	0.473379	0.637899	4.23689	6.7683	2.58908	3.75021	unbiased
Dictyota dichotoma	prot_D-dichotoma_M_contig1716.4868.1	-0.512509	0.31925	0.505758	57.0771	84.3702	15.2533	52.0443	unbiased
Dictyota dichotoma	prot_D-dichotoma_M_contig1716.4871.1	-0.261938	0.302881	0.774462	921.031	1180.85	284.916	383.908	unbiased
Dictyota dichotoma	prot_D-dichotoma_M_contig1717.4877.1	-0.86966	0.561566	0.524784	0.843461	1.558	0.746964	1.00913	unbiased
Dictyota dichotoma	prot_D-dichotoma_M_contig1719.4882.1	1.76394	1.21836	0.564506	0.47029	0.14761	0.455405	0.185864	not_expressed
Dictyota dichotoma	prot_D-dichotoma_M_contig68.17683.1	0.157044	0.315339	0.890706	167.197	162.511	60.7895	36.7689	unbiased
Dictyota dichotoma	prot_D-dichotoma_M_contig68.17685.1	0.812424	0.767103	0.70662	3.89234	2.29226	2.141	2.67564	unbiased
Dictyota dichotoma	prot_D-dichotoma_M_contig68.17693.1	0.0809016	1.75248	0.993351	3.10477	3.10279	3.84458	1.99409	unbiased
Dictyota dichotoma	prot_D-dichotoma_M_contig69.17767.1	-0.640968	0.530837	0.651245	5.83294	10.3681	5.23095	4.88366	unbiased
Dictyota dichotoma	prot_D-dichotoma_M_contig700.17913.1	0.373698	0.220065	0.466534	38.6943	30.6606	10.8661	5.91157	unbiased
Dictyota dichotoma	prot_D-dichotoma_M_contig700.17914.1	1.04202	0.348318	0.0811979	3.50486	1.79076	1.43494	0.249155	unbiased
Dictyota dichotoma	prot_D-dichotoma_M_contig701.17915.1	2.79725	1.93788	0.565336	0.773017	0.119553	1.16602	0.167622	not_expressed
Dictyota dichotoma	prot_D-dichotoma_M_contig701.17919.1	2.7302	2.83922		0.071897	0	0.131347	0	not_expressed
Dictyota dichotoma	prot_D-dichotoma_M_contig701.17920.1	0.878546	2.66795		0.0217767	0.00975665	0.0289775	0.0218165	not_expressed
Dictyota dichotoma	prot_D-dichotoma_M_contig701.17922.1	0.552872	0.529979	0.712412	26.7549	17.7281	17.7607	12.7567	unbiased
Dictyota dichotoma	prot_D-dichotoma_M_contig702.17925.1	-0.442257	0.242111	0.416737	9.28831	13.2994	2.91168	4.58974	unbiased
Dictyota dichotoma	prot_D-dichotoma_M_contig702.17930.1	4.33193	1.29182	0.0380561	0.355903	0.0137946	0.309333	0.0308456	not_expressed
Dictyota dichotoma	prot_D-dichotoma_M_contig703.17935.1	-0.0633561	0.305791	0.965807	8.53863	9.6329	2.34802	3.77211	unbiased
Dictyota dichotoma	prot_D-dichotoma_M_contig5274.15786.1	-1.2426	1.43835	0.774462	0.268505	0.683308	0.336698	0.644751	not_expressed
Dictyota dichotoma	prot_D-dichotoma_M_contig5282.15791.1	-0.524689	0.809379	0.84417	0.395759	0.620195	0.484056	0.607623	not_expressed
Dictyota dichotoma	prot_D-dichotoma_M_contig5282.15794.1	0.525409	0.553444	0.745332	1.58194	1.16118	1.76306	0.550921	unbiased
Dictyota dichotoma	prot_D-dichotoma_M_contig5294.15804.1	0.221206	1.68774	0.980371	0.0404426	0.0347419	0.0784691	0.02415	not_expressed
Dictyota dichotoma	prot_D-dichotoma_M_contig5294.15806.1	1.10921	0.395829	0.113813	3.58083	1.70833	1.70397	0.572875	unbiased
Dictyota dichotoma	prot_D-dichotoma_M_contig5294.15807.1	0.613964	0.720253	0.777539	1.6255	1.0888	1.28038	0.55876	unbiased
Dictyota dichotoma	prot_D-dichotoma_M_contig5305.15848.1	1.18627	0.922538	0.623493	2.71234	1.18767	2.69653	1.11285	unbiased
Dictyota dichotoma	prot_D-dichotoma_M_contig5312.15863.1	1.45921	0.495386	0.0881651	26.665	10.7659	15.7948	5.28413	unbiased
Dictyota dichotoma	prot_D-dichotoma_M_contig5316.15867.1				0	0	0	0	not_expressed
Dictyota dichotoma	prot_D-dichotoma_M_contig5324.15874.1	-0.600937	0.79181	0.80728	1.05441	1.6927	1.02294	1.05523	unbiased
Dictyota dichotoma	prot_D-dichotoma_M_contig5324.15875.1	0.13322	0.89367	0.97746	0.263238	0.25018	0.215998	0.186939	not_expressed
Dictyota dichotoma	prot_D-dichotoma_M_contig3076.10633.1	-1.27065	0.539704	0.223348	1.96182	5.07153	1.08551	5.26593	unbiased
Dictyota dichotoma	prot_D-dichotoma_M_contig3077.10637.1	-0.357507	0.381768	0.749697	27.6918	36.374	8.85344	27.3888	unbiased
Dictyota dichotoma	prot_D-dichotoma_M_contig3081.10661.1	3.19653	2.39625	0.605075	0.236219	0	0.496176	0	not_expressed
Dictyota dichotoma	prot_D-dichotoma_M_contig3085.10666.1	0.563171	0.869638	0.84431	1.63862	1.11854	1.93086	0.735529	unbiased
Dictyota dichotoma	prot_D-dichotoma_M_contig3085.10668.1	0.936007	1.02523	0.757787	0.639125	0.358797	0.741481	0.456569	not_expressed
Dictyota dichotoma	prot_D-dichotoma_M_contig3086.10671.1	-0.696441	0.816934	0.777539	0.521329	0.911852	0.379823	0.775695	not_expressed
Dictyota dichotoma	prot_D-dichotoma_M_contig917.19909.1	-0.204972	0.909695	0.961386	1.0239	1.15319	1.60924	1.08172	unbiased
Dictyota dichotoma	prot_D-dichotoma_M_contig918.19915.1	-0.160809	0.357637	0.903429	37.524	45.736	13.2401	29.9098	unbiased
Dictyota dichotoma	prot_D-dichotoma_M_contig918.19918.1	-0.129247	0.410578	0.939421	1.71965	2.06056	0.805088	0.96645	unbiased
Dictyota dichotoma	prot_D-dichotoma_M_contig921.19948.1	-0.712011	1.90069	0.923264	3.44818	5.78701	7.785	9.7565	unbiased
Dictyota dichotoma	prot_D-dichotoma_M_contig921.19949.1	-0.134497	0.802636	0.972367	2.00144	2.41035	2.25164	3.39875	unbiased
Dictyota dichotoma	prot_D-dichotoma_M_contig417.13583.1	0.551952	3.25789		0.0365736	0.023114	0.0593322	0.0516844	not_expressed
Dictyota dichotoma	prot_D-dichotoma_M_contig2842.9813.1	0.757622	0.959017	0.797654	0.224353	0.129047	0.358728	0.097962	not_expressed
Dictyota dichotoma	prot_D-dichotoma_M_contig2842.9814.1	0.54383	3.25792		0.0303604	0.0229182	0.0661829	0.0512465	not_expressed
Dictyota dichotoma	prot_D-dichotoma_M_contig2842.9815.1	1.78284	2.20489		0.122679	0.0266808	0.206492	0.0596602	not_expressed
Dictyota dichotoma	prot_D-dichotoma_M_contig2850.9838.1	0.409492	0.461896	0.766411	8.64831	7.02838	6.09148	3.41268	unbiased
Dictyota dichotoma	prot_D-dichotoma_M_contig654.17468.1	0.549367	3.25801		0.013543	0	0.0428268	0	not_expressed
Dictyota dichotoma	prot_D-dichotoma_M_contig654.17483.1	0.389529	0.615369	0.847719	4.31778	3.29334	3.74491	1.51426	unbiased
Dictyota dichotoma	prot_D-dichotoma_M_contig655.17493.1	-0.254516	0.297956	0.777225	5.54508	7.0203	2.22665	2.1236	unbiased
Dictyota dichotoma	prot_D-dichotoma_M_contig656.17494.1	2.26574	1.69037	0.602825	0.238735	0.0550403	0.241661	0.123074	not_expressed
Dictyota dichotoma	prot_D-dichotoma_M_contig358.12067.1	-0.675445	0.829207	0.791311	3.93729	6.60958	5.80765	7.4481	unbiased
Dictyota dichotoma	prot_D-dichotoma_M_contig358.12068.1	-1.42972	0.806784	0.436703	2.52661	6.97945	4.02298	7.81901	unbiased
Dictyota dichotoma	prot_D-dichotoma_M_contig360.12137.1	0.807243	0.331143	0.199503	12.6339	7.49648	6.22816	2.96641	unbiased
Dictyota dichotoma	prot_D-dichotoma_M_contig360.12138.1	-0.515446	0.22063	0.228604	29.7279	44.147	10.8793	11.251	unbiased
Dictyota dichotoma	prot_D-dichotoma_M_contig361.12166.1	0.114318	0.195736	0.864364	21.0141	21.0496	3.39701	8.48979	unbiased
Dictyota dichotoma	prot_D-dichotoma_M_contig361.12167.1	-0.219316	0.204641	0.703173	13.0714	16.2337	2.64227	5.47576	unbiased
Dictyota dichotoma	prot_D-dichotoma_M_contig361.12168.1	-0.00675116	0.261006	0.996279	9.50553	10.2529	2.98218	4.53615	unbiased
Dictyota dichotoma	prot_D-dichotoma_M_contig361.12169.1	-0.186396	0.292206	0.847349	3.89018	4.66756	1.60086	1.22686	unbiased
Dictyota dichotoma	prot_D-dichotoma_M_contig688.17758.1	-0.838961	0.548113	0.529958	1.12733	2.10202	0.798292	0.891	unbiased
Dictyota dichotoma	prot_D-dichotoma_M_contig689.17760.1	2.81012	2.82372		0.0776459	0	0.13477	0	not_expressed
Dictyota dichotoma	prot_D-dichotoma_M_contig19.5741.1	-0.455154	0.368599	0.642863	6.33828	9.438	3.11322	4.63063	unbiased
Dictyota dichotoma	prot_D-dichotoma_M_contig19.5742.1	0.024036	0.284758	0.988712	11.3858	12.2866	2.78162	5.21827	unbiased
Dictyota dichotoma	prot_D-dichotoma_M_contig19.5748.1	0.000729175	0.165906	0.998804	38.8581	40.7847	10.2822	8.26406	unbiased
Dictyota dichotoma	prot_D-dichotoma_M_contig19.5761.1	-0.0456249	0.267387	0.971914	37.3542	41.0231	10.1936	11.5725	unbiased
Dictyota dichotoma	prot_D-dichotoma_M_contig19.5764.1	0.094455	0.594155	0.974358	4.54886	4.59402	4.38998	5.25924	unbiased
Dictyota dichotoma	prot_D-dichotoma_M_contig19.5765.1	0.428321	0.708069	0.856733	5.27475	4.29589	4.79753	3.43294	unbiased
Dictyota dichotoma	prot_D-dichotoma_M_contig20.6295.1	4.37265	1.63133	0.138679	0.754622	0.0368581	1.10553	0.0824171	not_expressed
Dictyota dichotoma	prot_D-dichotoma_M_contig20.6311.1	0.342249	0.66671	0.887187	20.7058	15.9812	22.4563	8.94697	unbiased
Dictyota dichotoma	prot_D-dichotoma_M_contig1012.189.1	0.312922	0.484709	0.845129	2.48902	2.0909	1.63404	0.935409	unbiased
Dictyota dichotoma	prot_D-dichotoma_M_contig1014.210.1	0.935711	0.978034	0.742668	0.62631	0.328877	0.868394	0.330883	not_expressed
Dictyota dichotoma	prot_D-dichotoma_M_contig1014.212.1	1.11758	0.809232	0.589009	2.77989	1.39961	3.785	0.729427	unbiased
Dictyota dichotoma	prot_D-dichotoma_M_contig1014.215.1	0.70929	0.569568	0.638793	0.962625	0.633731	0.297875	0.537095	not_expressed
Dictyota dichotoma	prot_D-dichotoma_M_contig589.16744.1	3.65822	1.37801	0.144751	0.42515	0.0265969	0.430253	0.0594725	not_expressed
Dictyota dichotoma	prot_D-dichotoma_M_contig589.16749.1	0.0196711	0.45322	0.993594	18.3419	18.226	11.1388	9.35202	unbiased
Dictyota dichotoma	prot_D-dichotoma_M_contig590.16761.1	-0.53141	0.357151	0.546057	42.8921	63.0719	18.961	14.3542	unbiased
Dictyota dichotoma	prot_D-dichotoma_M_contig1066.605.1	-0.101291	0.259247	0.92028	36.2656	41.0738	12.0215	18.0209	unbiased
Dictyota dichotoma	prot_D-dichotoma_M_contig1066.606.1	-0.347299	0.448213	0.800847	12.9147	16.8885	6.5364	10.7281	unbiased
Dictyota dichotoma	prot_D-dichotoma_M_contig1067.610.1	0.138021	0.655224	0.964952	1.27354	1.20661	0.806958	0.950077	unbiased
Dictyota dichotoma	prot_D-dichotoma_M_contig1068.617.1	0.46772	0.443507	0.708156	8.84297	6.82581	6.91274	4.01732	unbiased
Dictyota dichotoma	prot_D-dichotoma_M_contig1070.634.1	4.09687	2.04107	0.349367	0.687612	0.0447293	1.3179	0.0670431	not_expressed
Dictyota dichotoma	prot_D-dichotoma_M_contig1382.2830.1	0.485496	0.561972	0.774462	3.486	2.48959	2.63185	1.58953	unbiased
Dictyota dichotoma	prot_D-dichotoma_M_contig1383.2836.1	0.586384	1.3548	0.907695	0.336778	0.228883	0.361977	0.219092	not_expressed
Dictyota dichotoma	prot_D-dichotoma_M_contig1384.2838.1	0.643421	1.26385	0.887528	0.311189	0.219193	0.265137	0.303002	not_expressed
Dictyota dichotoma	prot_D-dichotoma_M_contig1386.2844.1	2.72636	2.04239		0.141668	0	0.142145	0	not_expressed
Dictyota dichotoma	prot_D-dichotoma_M_contig1386.2845.1	-0.0630328	1.61051	0.993775	0.310855	0.333884	0.462368	0.409955	not_expressed
Dictyota dichotoma	prot_D-dichotoma_M_contig1386.2846.1	1.35621	3.23188		0.191898	0.0719102	0.538389	0.160796	not_expressed
Dictyota dichotoma	prot_D-dichotoma_M_contig1386.2847.1	6.01321	2.32402	0.160022	2.07345	0	3.69851	0	unbiased
Dictyota dichotoma	prot_D-dichotoma_M_contig333.11422.1	-0.803233	0.525872	0.532155	1.08169	1.89155	0.757677	0.942519	unbiased
Dictyota dichotoma	prot_D-dichotoma_M_contig333.11430.1	-0.0358849	0.242652	0.977712	36.1964	39.7773	8.65403	12.3633	unbiased
Dictyota dichotoma	prot_D-dichotoma_M_contig333.11432.1	0.581603	0.68054	0.777225	1.62421	1.21721	0.951985	1.30626	unbiased
Dictyota dichotoma	prot_D-dichotoma_M_contig333.11436.1	-0.764803	0.479033	0.509191	19.1156	33.7098	13.7253	15.3453	unbiased
Dictyota dichotoma	prot_D-dichotoma_M_contig334.11451.1	1.03707	0.733501	0.577522	1.39647	0.710737	2.17274	0.396543	unbiased
Dictyota dichotoma	prot_D-dichotoma_M_contig41.13394.1	-0.873037	1.28824	0.83546	0.102537	0.204352	0.11451	0.183066	not_expressed
Dictyota dichotoma	prot_D-dichotoma_M_contig41.13398.1	3.94565	0.993756	0.0069066	2.65144	0.188242	4.38271	0.187385	GA_specific
Dictyota dichotoma	prot_D-dichotoma_M_contig41.13413.1	0.844405	0.991981	0.778284	0.16267	0.0903178	0.158627	0.118615	not_expressed
Dictyota dichotoma	prot_D-dichotoma_M_contig42.13626.1	-0.559443	0.749514	0.812331	0.729299	1.07739	0.636354	0.555847	unbiased
Dictyota dichotoma	prot_D-dichotoma_M_contig42.13628.1	0.584828	0.547931	0.70432	6.53892	4.4891	4.40388	2.61735	unbiased
Dictyota dichotoma	prot_D-dichotoma_M_contig42.13644.1	-0.335664	0.278832	0.653138	15.4133	20.1338	5.81339	6.71246	unbiased
Dictyota dichotoma	prot_D-dichotoma_M_contig42.13649.1	-0.0196415	0.406064	0.993351	6.41452	6.78708	3.55765	2.91078	unbiased
Dictyota dichotoma	prot_D-dichotoma_M_contig2279.7657.1	-0.0240624	1.57369	0.997681	0.231092	0.233971	0.295559	0.268133	not_expressed
Dictyota dichotoma	prot_D-dichotoma_M_contig2282.7678.1	-0.130766	0.243771	0.878978	26.2966	29.7416	9.78788	10.6437	unbiased
Dictyota dichotoma	prot_D-dichotoma_M_contig2285.7688.1	0.0271655	0.529186	0.99295	0.959217	1.0175	0.573475	0.806221	unbiased
Dictyota dichotoma	prot_D-dichotoma_M_contig2285.7689.1	-0.363663	0.309022	0.663056	1.8483	2.51064	0.767571	1.05534	unbiased
Dictyota dichotoma	prot_D-dichotoma_M_contig2285.7690.1	0.15355	0.423568	0.927174	0.909113	0.86219	0.31359	0.619545	not_expressed
Dictyota dichotoma	prot_D-dichotoma_M_contig649.17424.1	0.951686	0.601451	0.513739	177.363	100.22	179.956	47.725	unbiased
Dictyota dichotoma	prot_D-dichotoma_M_contig650.17443.1	0.707131	0.903291	0.80027	0.428238	0.273004	0.314314	0.218909	not_expressed
Dictyota dichotoma	prot_D-dichotoma_M_contig650.17444.1	1.89885	2.37932	0.796797	0.175393	0.0585536	0.315214	0.13093	not_expressed
Dictyota dichotoma	prot_D-dichotoma_M_contig650.17445.1	2.60526	1.4031	0.405122	0.490302	0.0991992	0.65393	0.172708	not_expressed
Dictyota dichotoma	prot_D-dichotoma_M_contig652.17454.1	-0.301133	0.492026	0.854056	2.28083	2.9567	1.3653	1.49393	unbiased
Dictyota dichotoma	prot_D-dichotoma_M_contig652.17460.1	2.00232	0.566916	0.0243725	3.76403	0.988837	2.19614	0.717886	GA_specific
Dictyota dichotoma	prot_D-dichotoma_M_contig652.17461.1	0.704155	1.99909		0.100417	0.0670795	0.110195	0.0918653	not_expressed
Dictyota dichotoma	prot_D-dichotoma_M_contig1861.5566.1	-0.02293	0.227495	0.984727	6.12653	6.59448	1.75651	1.37476	unbiased
Dictyota dichotoma	prot_D-dichotoma_M_contig1861.5567.1	-0.459472	0.213079	0.292312	4.53445	6.59012	1.34115	1.5855	unbiased
Dictyota dichotoma	prot_D-dichotoma_M_contig1863.5573.1	-0.0116923	0.955803	0.998304	8.52975	9.20319	10.3093	11.2963	unbiased
Dictyota dichotoma	prot_D-dichotoma_M_contig1865.5580.1	0.396015	0.342205	0.671076	12.3133	9.86771	6.27514	4.83491	unbiased
Dictyota dichotoma	prot_D-dichotoma_M_contig1866.5589.1	0.146607	0.223039	0.840516	14.556	14.105	3.40206	5.71	unbiased
Dictyota dichotoma	prot_D-dichotoma_M_contig1866.5590.1	-0.262376	0.358422	0.81743	5.04849	6.49233	2.03134	4.12313	unbiased
Dictyota dichotoma	prot_D-dichotoma_M_contig1867.5594.1	0.484534	0.699849	0.828741	2.29528	1.65703	2.34723	1.02518	unbiased
Dictyota dichotoma	prot_D-dichotoma_M_contig1867.5595.1	-0.263508	0.311242	0.779461	4.65276	5.87408	2.26802	2.74958	unbiased
Dictyota dichotoma	prot_D-dichotoma_M_contig1443.3246.1	0.149127	0.266041	0.873091	46.9261	43.9624	19.4288	10.4336	unbiased
Dictyota dichotoma	prot_D-dichotoma_M_contig1443.3254.1	0.137303	0.490599	0.947432	12.6081	12.4139	6.64248	9.84727	unbiased
Dictyota dichotoma	prot_D-dichotoma_M_contig1443.3255.1	0.478425	0.472072	0.722301	7.05138	5.67612	4.40036	2.87385	unbiased
Dictyota dichotoma	prot_D-dichotoma_M_contig1446.3264.1	3.29664	2.27901	0.56456	0.976579	0.0155445	2.36338	0.0347585	not_expressed
Dictyota dichotoma	prot_D-dichotoma_M_contig1449.3277.1	-0.356712	0.160983	0.272132	27.8955	38.515	3.11925	13.8864	unbiased
Dictyota dichotoma	prot_D-dichotoma_M_contig3969.13038.1	2.86242	1.81183	0.514211	1.4541	0.216876	2.43367	0.405602	unbiased
Dictyota dichotoma	prot_D-dichotoma_M_contig3970.13044.1	0.107252	0.694374	0.975416	1.46441	1.37702	1.17176	0.877562	unbiased
Dictyota dichotoma	prot_D-dichotoma_M_contig3971.13046.1	-0.48922	0.836079	0.86415	2.09149	3.05701	2.62062	1.86267	unbiased
Dictyota dichotoma	prot_D-dichotoma_M_contig3982.13063.1	1.46994	2.33274	0.848615	0.111013	0.0502139	0.192746	0.112282	not_expressed
Dictyota dichotoma	prot_D-dichotoma_M_contig3987.13067.1	-0.277239	2.44158	0.983013	0.0905695	0.107347	0.172318	0.188967	not_expressed
Dictyota dichotoma	prot_D-dichotoma_M_contig3987.13069.1	5.13801	1.23782	0.00390175	2.22936	0.0611343	2.35491	0.0838303	GA_specific
Dictyota dichotoma	prot_D-dichotoma_M_contig3990.13085.1	-0.362654	1.31628	0.947943	0.228261	0.311896	0.236407	0.329984	not_expressed
Dictyota dichotoma	prot_D-dichotoma_M_contig3990.13086.1	-0.318346	0.379671	0.783392	43.5832	55.8691	22.487	22.2035	unbiased
Dictyota dichotoma	prot_D-dichotoma_M_contig3995.13096.1	2.5027	0.602182	0.00383807	47.1427	8.51564	38.6871	3.78048	GA_biased
Dictyota dichotoma	prot_D-dichotoma_M_contig244.8359.1	1.28789	3.16354		0.105074	0.0360561	0.215676	0.080624	not_expressed
Dictyota dichotoma	prot_D-dichotoma_M_contig244.8364.1	-0.227413	0.38879	0.86415	3.5833	4.59873	1.16381	2.55595	unbiased
Dictyota dichotoma	prot_D-dichotoma_M_contig245.8398.1	0.410965	0.303585	0.596669	29.0233	23.829	9.45527	8.64914	unbiased
Dictyota dichotoma	prot_D-dichotoma_M_contig14.2948.1	-0.0228217	0.273585	0.988893	21.7221	23.1966	10.0233	9.09756	unbiased
Dictyota dichotoma	prot_D-dichotoma_M_contig14.2949.1	-0.310845	0.389413	0.796797	5.82791	7.41472	3.10716	1.63467	unbiased
Dictyota dichotoma	prot_D-dichotoma_M_contig14.2951.1	0.503243	0.319456	0.516256	8.97849	6.9864	3.39704	1.91752	unbiased
Dictyota dichotoma	prot_D-dichotoma_M_contig14.2959.1	0.549367	3.25801		0.0116085	0	0.0367093	0	not_expressed
Dictyota dichotoma	prot_D-dichotoma_M_contig14.2960.1	0.653385	2.46707		0.119035	0.0748858	0.215198	0.16745	not_expressed
Dictyota dichotoma	prot_D-dichotoma_M_contig14.2973.1	0.0512362	0.337757	0.976878	5.53008	5.67719	2.561	1.77714	unbiased
Dictyota dichotoma	prot_D-dichotoma_M_contig1073.649.1	0.307502	0.372194	0.788755	18.7604	16.6366	8.8646	6.31719	unbiased
Dictyota dichotoma	prot_D-dichotoma_M_contig1076.671.1	-0.308804	0.244322	0.632994	5.35481	6.96027	1.51244	2.23952	unbiased
Dictyota dichotoma	prot_D-dichotoma_M_contig87.19451.1	-0.633025	0.77347	0.790092	2.17171	3.4772	2.08414	2.88238	unbiased
Dictyota dichotoma	prot_D-dichotoma_M_contig87.19453.1	-0.253863	0.262539	0.740538	16.6584	21.4536	5.02766	6.17484	unbiased
Dictyota dichotoma	prot_D-dichotoma_M_contig87.19456.1	4.35644	1.30419	0.0391841	5.94976	0.323503	11.5457	0.410251	GA_specific
Dictyota dichotoma	prot_D-dichotoma_M_contig87.19462.1	-0.101323	0.471754	0.963951	2.19921	2.49769	1.15197	1.66489	unbiased
Dictyota dichotoma	prot_D-dichotoma_M_contig87.19466.1	1.94371	0.565581	0.030856	1.61782	0.443706	1.55852	0.229851	GA_specific
Dictyota dichotoma	prot_D-dichotoma_M_contig87.19467.1	2.45838	0.897614	0.126988	0.398196	0.0730586	0.403236	0.0786148	not_expressed
Dictyota dichotoma	prot_D-dichotoma_M_contig87.19469.1	0.201673	0.67381	0.943193	1.03054	0.941521	0.628774	0.723393	unbiased
Dictyota dichotoma	prot_D-dichotoma_M_contig88.19546.1	1.86323	1.71957	0.698172	0.356265	0.100073	0.668476	0.107363	not_expressed
Dictyota dichotoma	prot_D-dichotoma_M_contig88.19548.1	3.98321	1.96956	0.344022	0.551975	0.00995679	1.15094	0.0222641	not_expressed
Dictyota dichotoma	prot_D-dichotoma_M_contig88.19554.1	-0.5722	0.471572	0.650061	9.16452	14.4829	4.75602	9.58762	unbiased
Dictyota dichotoma	prot_D-dichotoma_M_contig88.19560.1	-0.0401164	0.295614	0.979621	22.174	24.8608	7.11635	10.6546	unbiased
Dictyota dichotoma	prot_D-dichotoma_M_contig88.19561.1	-0.283818	0.256053	0.689488	17.5706	22.7003	6.08008	10.2491	unbiased
Dictyota dichotoma	prot_D-dichotoma_M_contig8.18824.1	-7.62642	0.487377	3.25761e-51	0.14003	30.8429	0.180215	5.42976	SP_specific
Dictyota dichotoma	prot_D-dichotoma_M_contig8.18845.1	-0.144631	0.247226	0.86415	47.3622	55.4621	14.3247	25.8551	unbiased
Dictyota dichotoma	prot_D-dichotoma_M_contig8.18852.1	0.187914	1.74503	0.984041	0.127412	0.126413	0.159061	0.173344	not_expressed
Dictyota dichotoma	prot_D-dichotoma_M_contig8.18854.1	-0.0353943	0.143404	0.955028	21.9517	24.075	3.33413	6.74317	unbiased
Dictyota dichotoma	prot_D-dichotoma_M_contig8.18855.1	-0.668013	0.323502	0.328569	21.121	35.149	7.33874	20.7267	unbiased
Dictyota dichotoma	prot_D-dichotoma_M_contig8.18856.1	-0.284802	0.278211	0.718685	10.7236	13.6634	4.13509	4.47541	unbiased
Dictyota dichotoma	prot_D-dichotoma_M_contig1313.2435.1	-0.270391	0.579907	0.899369	3.67886	4.76782	3.04201	3.15834	unbiased
Dictyota dichotoma	prot_D-dichotoma_M_contig1313.2436.1	0.350613	0.594832	0.862484	0.912506	0.745102	0.479428	0.34055	not_expressed
Dictyota dichotoma	prot_D-dichotoma_M_contig1313.2437.1	-1.0515	3.22457		0.0224962	0.0737307	0.0474369	0.164867	not_expressed
Dictyota dichotoma	prot_D-dichotoma_M_contig1313.2438.1	0.547239	3.25791		0.0321606	0.0229182	0.0520835	0.0512465	not_expressed
Dictyota dichotoma	prot_D-dichotoma_M_contig1315.2441.1				0	0	0	0	not_expressed
Dictyota dichotoma	prot_D-dichotoma_M_contig1319.2451.1	0.549367	3.25801		0.0174504	0	0.055183	0	not_expressed
Dictyota dichotoma	prot_D-dichotoma_M_contig1319.2453.1	-1.02281	0.407151	0.179227	1.32716	2.8932	0.697543	1.10698	unbiased
Dictyota dichotoma	prot_D-dichotoma_M_contig2029.6459.1	-0.660657	0.302224	0.282367	7.14972	12.218	2.74251	7.24	unbiased
Dictyota dichotoma	prot_D-dichotoma_M_contig2029.6462.1	0.330751	0.302256	0.693407	55.6184	45.7211	18.9452	19.5052	unbiased
Dictyota dichotoma	prot_D-dichotoma_M_contig2031.6483.1	0.0521124	0.726067	0.990321	5.53276	5.48428	4.45249	4.86663	unbiased
Dictyota dichotoma	prot_D-dichotoma_M_contig2031.6484.1	0.212673	0.318588	0.838738	8.35515	7.63376	1.5553	3.73626	unbiased
Dictyota dichotoma	prot_D-dichotoma_M_contig2032.6487.1	0.280691	0.538535	0.884853	0.755306	0.665826	0.466602	0.310791	not_expressed
Dictyota dichotoma	prot_D-dichotoma_M_contig2032.6488.1	-0.44919	0.563469	0.796902	38.9433	52.433	34.1724	31.9552	unbiased
Dictyota dichotoma	prot_D-dichotoma_M_contig2032.6489.1	2.95739	2.02966		0.194664	0	0.217476	0	not_expressed
Dictyota dichotoma	prot_D-dichotoma_M_contig2033.6491.1	0.837903	3.25801		0.0354221	0	0.0753574	0	not_expressed
Dictyota dichotoma	prot_D-dichotoma_M_contig2033.6492.1	1.88174	1.07448	0.446054	0.94796	0.285828	1.01366	0.26303	not_expressed
Dictyota dichotoma	prot_D-dichotoma_M_contig2034.6497.1	0.305088	0.416136	0.816712	12.7342	10.5429	6.88332	1.78176	unbiased
Dictyota dichotoma	prot_D-dichotoma_M_contig2036.6501.1	1.13694	0.904976	0.636873	1.12549	0.531535	0.929402	0.590378	unbiased
Dictyota dichotoma	prot_D-dichotoma_M_contig2036.6502.1	-0.193054	0.416111	0.899577	19.8802	23.5109	8.13951	14.9072	unbiased
Dictyota dichotoma	prot_D-dichotoma_M_contig1932.5934.1	0.328406	0.28088	0.666724	2.04801	1.72861	0.421343	0.574617	unbiased
Dictyota dichotoma	prot_D-dichotoma_M_contig1932.5939.1	-0.109711	0.235252	0.899369	3.04614	3.53048	0.761602	1.0349	unbiased
Dictyota dichotoma	prot_D-dichotoma_M_contig1934.5943.1	0.09711	0.573579	0.971942	0.862289	0.856557	0.457235	0.541018	not_expressed
Dictyota dichotoma	prot_D-dichotoma_M_contig1934.5944.1	-0.230657	0.963216	0.95694	0.489774	0.63342	0.471758	0.479728	not_expressed
Dictyota dichotoma	prot_D-dichotoma_M_contig1934.5945.1	0.828335	1.62466	0.887528	0.411874	0.228472	0.668278	0.448039	not_expressed
Dictyota dichotoma	prot_D-dichotoma_M_contig1941.5985.1	-0.459304	0.775496	0.860799	0.34371	0.488389	0.251168	0.368401	not_expressed
Dictyota dichotoma	prot_D-dichotoma_M_contig1941.5986.1	0.22767	1.56465	0.977885	0.213343	0.199479	0.279204	0.239866	not_expressed
Dictyota dichotoma	prot_D-dichotoma_M_contig1307.2378.1	-0.749928	1.14921	0.842804	1.01417	1.77263	1.51943	1.9635	unbiased
Dictyota dichotoma	prot_D-dichotoma_M_contig1309.2386.1	0.73319	0.403578	0.421229	6.02267	3.70569	3.34019	1.60108	unbiased
Dictyota dichotoma	prot_D-dichotoma_M_contig1310.2409.1	1.07542	0.920187	0.666724	0.936066	0.453736	0.939021	0.372773	not_expressed
Dictyota dichotoma	prot_D-dichotoma_M_contig1310.2411.1	1.13312	0.823966	0.5905	1.89689	0.909575	3.12509	0.698917	unbiased
Dictyota dichotoma	prot_D-dichotoma_M_contig1310.2412.1	0.917861	0.67332	0.594087	7.06962	4.26035	5.98029	2.88208	unbiased
Dictyota dichotoma	prot_D-dichotoma_M_contig1310.2413.1	0.280499	0.315335	0.765614	19.964	18.271	5.74651	10.2867	unbiased
Dictyota dichotoma	prot_D-dichotoma_M_contig1311.2415.1	-0.2222	0.319696	0.827956	10.3986	12.58	4.48482	3.20807	unbiased
Dictyota dichotoma	prot_D-dichotoma_M_contig1311.2426.1	0.6062	0.74199	0.790434	1.41704	1.00007	1.72385	0.998837	unbiased
Dictyota dichotoma	prot_D-dichotoma_M_contig548.16120.1	0.350596	0.218209	0.505218	27.2162	22.9578	6.78875	6.66126	unbiased
Dictyota dichotoma	prot_D-dichotoma_M_contig548.16136.1	-0.72009	1.01848	0.826157	0.357348	0.613853	0.419008	0.387797	not_expressed
Dictyota dichotoma	prot_D-dichotoma_M_contig548.16137.1	0.338714	0.638957	0.881826	1.40016	1.19071	0.876191	1.00291	unbiased
Dictyota dichotoma	prot_D-dichotoma_M_contig549.16145.1	0.545545	0.526089	0.71353	108.695	83.0866	81.2326	38.2719	unbiased
Dictyota dichotoma	prot_D-dichotoma_M_contig550.16167.1	-0.146468	0.296533	0.891225	11.9255	13.6703	5.16038	3.7095	unbiased
Dictyota dichotoma	prot_D-dichotoma_M_contig550.16172.1	-0.495974	0.462617	0.703173	48.1647	68.5372	36.6968	20.4797	unbiased
Dictyota dichotoma	prot_D-dichotoma_M_contig550.16173.1	-0.40144	0.589104	0.833575	42.6303	55.8477	35.4915	13.6565	unbiased
Dictyota dichotoma	prot_D-dichotoma_M_contig494.15164.1	1.63522	3.25268		0.0671149	0	0.11786	0	not_expressed
Dictyota dichotoma	prot_D-dichotoma_M_contig494.15165.1	1.78165	3.24943		0.079705	0	0.166067	0	not_expressed
Dictyota dichotoma	prot_D-dichotoma_M_contig710.18013.1	-0.344659	0.138168	0.183039	68.0939	91.236	12.92	17.4909	unbiased
Dictyota dichotoma	prot_D-dichotoma_M_contig712.18031.1	0.332901	0.515555	0.845067	5.45681	4.39741	3.58985	2.32802	unbiased
Dictyota dichotoma	prot_D-dichotoma_M_contig4257.13783.1	-0.453898	0.242742	0.401243	432.76	621.995	125.051	240.124	unbiased
Dictyota dichotoma	prot_D-dichotoma_M_contig4263.13801.1	-0.248949	0.713254	0.930627	1.49086	1.78466	0.950271	1.60091	unbiased
Dictyota dichotoma	prot_D-dichotoma_M_contig4274.13814.1	-0.248263	0.349174	0.824699	2.06517	2.63326	0.512974	1.42107	unbiased
Dictyota dichotoma	prot_D-dichotoma_M_contig4275.13816.1	-0.120665	0.31519	0.922113	5.29043	6.14785	1.86302	3.08999	unbiased
Dictyota dichotoma	prot_D-dichotoma_M_contig4283.13829.1	-1.81463	1.40734	0.622418	0.173825	0.629569	0.205795	0.781572	not_expressed
Dictyota dichotoma	prot_D-dichotoma_M_contig4285.13834.1	0.0264208	0.273474	0.985323	26.5661	27.108	10.9219	6.50396	unbiased
Dictyota dichotoma	prot_D-dichotoma_M_contig4285.13835.1	0.348422	0.459845	0.807519	2.85721	2.318	1.77636	1.45193	unbiased
Dictyota dichotoma	prot_D-dichotoma_M_contig2888.9960.1	2.98034	2.76387		0.0650972	0	0.115035	0	not_expressed
Dictyota dichotoma	prot_D-dichotoma_M_contig2893.9989.1	-0.469952	0.289857	0.498735	16.5342	23.6646	6.36059	11.1171	unbiased
Dictyota dichotoma	prot_D-dichotoma_M_contig2893.9990.1	-0.0125152	0.428184	0.99558	12.6024	13.4883	6.14139	8.55679	unbiased
Dictyota dichotoma	prot_D-dichotoma_M_contig2896.9993.1	1.6963	0.972677	0.447998	0.496053	0.157742	0.50066	0.176213	not_expressed
Dictyota dichotoma	prot_D-dichotoma_M_contig2898.9998.1	0.0293246	0.287896	0.984667	9.90446	10.1318	3.628	1.28509	unbiased
Dictyota dichotoma	prot_D-dichotoma_M_contig2899.10000.1	-0.634134	0.37735	0.47421	23.5252	37.6847	5.18871	30.8835	unbiased
Dictyota dichotoma	prot_D-dichotoma_M_contig569.16455.1	0.866911	0.49865	0.450051	5.54759	3.2783	3.65483	2.35754	unbiased
Dictyota dichotoma	prot_D-dichotoma_M_contig571.16488.1	4.64841	1.23524	0.0125602	5.79262	0.259228	11.4522	0.407669	GA_specific
Dictyota dichotoma	prot_D-dichotoma_M_contig571.16489.1	2.89246	1.29266	0.264268	2.17125	0.326254	4.0773	0.474206	unbiased
Dictyota dichotoma	prot_D-dichotoma_M_contig571.16490.1	2.19285	1.09463	0.350418	1.56531	0.354584	2.19717	0.358694	unbiased
Dictyota dichotoma	prot_D-dichotoma_M_contig571.16492.1	0.549367	3.25801		0.0147004	0	0.0464866	0	not_expressed
Dictyota dichotoma	prot_D-dichotoma_M_contig2700.9333.1	0.536814	0.500886	0.703173	4.9185	3.529	3.83202	3.07421	unbiased
Dictyota dichotoma	prot_D-dichotoma_M_contig2700.9334.1	-1.92562	1.50528	0.626212	8.41374	34.4425	14.7763	43.7113	unbiased
Dictyota dichotoma	prot_D-dichotoma_M_contig2703.9337.1	0.807245	0.603026	0.602952	4.12403	2.4876	2.37575	1.591	unbiased
Dictyota dichotoma	prot_D-dichotoma_M_contig2703.9339.1	-0.202883	0.301047	0.837203	3.37413	4.12643	1.51418	1.83045	unbiased
Dictyota dichotoma	prot_D-dichotoma_M_contig2705.9347.1	1.45886	3.25601		0.0698016	0	0.220732	0	not_expressed
Dictyota dichotoma	prot_D-dichotoma_M_contig2706.9350.1	3.27004	1.71304	0.385298	0.583508	0.0709371	1.21703	0.15862	not_expressed
Dictyota dichotoma	prot_D-dichotoma_M_contig2709.9357.1	1.83956	3.24818		0.119821	0	0.25393	0	not_expressed
Dictyota dichotoma	prot_D-dichotoma_M_contig2710.9372.1	0.0813715	0.195299	0.912276	2.65148	2.65564	0.618492	0.805564	unbiased
Dictyota dichotoma	prot_D-dichotoma_M_contig2710.9373.1	-0.23246	0.323685	0.821499	1.80939	2.23208	0.868593	1.11177	unbiased
Dictyota dichotoma	prot_D-dichotoma_M_contig2710.9374.1	-0.29928	0.339041	0.767228	0.941276	1.20861	0.429134	0.563284	unbiased
Dictyota dichotoma	prot_D-dichotoma_M_contig2713.9382.1	2.75643	1.26969	0.288189	1.19338	0.051481	2.67154	0.0601718	unbiased
Dictyota dichotoma	prot_D-dichotoma_M_contig465.14589.1	0.365263	0.801956	0.902516	0.621121	0.48425	0.618387	0.217435	not_expressed
Dictyota dichotoma	prot_D-dichotoma_M_contig465.14590.1	1.69174	1.1101	0.533894	0.584857	0.195013	0.730631	0.18213	not_expressed
Dictyota dichotoma	prot_D-dichotoma_M_contig465.14591.1	-0.445413	0.283277	0.517761	25.5943	36.759	11.256	15.241	unbiased
Dictyota dichotoma	prot_D-dichotoma_M_contig465.14596.1	0.10294	0.186557	0.875285	28.0403	27.7783	4.2815	8.60099	unbiased
Dictyota dichotoma	prot_D-dichotoma_M_contig466.14604.1	-0.868393	1.07617	0.793953	0.246176	0.487546	0.200886	0.514184	not_expressed
Dictyota dichotoma	prot_D-dichotoma_M_contig1287.2189.1	3.32047	1.34659	0.190048	0.469427	0.0513193	0.625398	0.0506255	not_expressed
Dictyota dichotoma	prot_D-dichotoma_M_contig1287.2192.1	-0.153348	0.71478	0.964009	1.1131	1.26727	0.717446	1.00906	unbiased
Dictyota dichotoma	prot_D-dichotoma_M_contig1287.2193.1	0.376214	0.37766	0.729308	5.06816	4.12164	2.96972	1.70144	unbiased
Dictyota dichotoma	prot_D-dichotoma_M_contig1289.2197.1	1.12902	3.25789		0.0379945	0	0.0618323	0	not_expressed
Dictyota dichotoma	prot_D-dichotoma_M_contig1289.2200.1	0.413382	1.44719	0.946527	0.359577	0.316318	0.310468	0.616527	not_expressed
Dictyota dichotoma	prot_D-dichotoma_M_contig1289.2201.1	0.51649	0.801344	0.845507	0.70182	0.561558	0.583819	0.559482	not_expressed
Dictyota dichotoma	prot_D-dichotoma_M_contig1289.2202.1	-0.210713	1.85999	0.983013	0.161262	0.167159	0.271224	0.322227	not_expressed
Dictyota dichotoma	prot_D-dichotoma_M_contig1289.2203.1	-1.71077	1.60978	0.705844	0.0852734	0.258541	0.186471	0.323824	not_expressed
Dictyota dichotoma	prot_D-dichotoma_M_contig1291.2224.1	-0.0117885	0.541035	0.996717	4.08295	4.32481	2.63222	2.70516	unbiased
Dictyota dichotoma	prot_D-dichotoma_M_contig786.18691.1	0.98729	1.8644	0.881826	0.27171	0.159622	0.427176	0.259118	not_expressed
Dictyota dichotoma	prot_D-dichotoma_M_contig787.18695.1	-0.0749265	0.221996	0.934316	12.2738	13.8101	3.18467	5.80133	unbiased
Dictyota dichotoma	prot_D-dichotoma_M_contig788.18698.1	1.9367	0.908501	0.30201	0.668633	0.18575	0.463483	0.165134	not_expressed
Dictyota dichotoma	prot_D-dichotoma_M_contig789.18701.1	-0.199721	0.417926	0.896769	19.6108	22.865	10.3303	13.497	unbiased
Dictyota dichotoma	prot_D-dichotoma_M_contig789.18710.1	-3.03077	1.59401	0.388456	0.0951867	0.784947	0.139093	0.733928	not_expressed
Dictyota dichotoma	prot_D-dichotoma_M_contig2547.8754.1	-0.195278	0.384036	0.887536	2.43078	2.95845	1.20857	1.36242	unbiased
Dictyota dichotoma	prot_D-dichotoma_M_contig2548.8762.1	-1.78811	1.25838	0.574325	0.0984386	0.362788	0.0948623	0.447547	not_expressed
Dictyota dichotoma	prot_D-dichotoma_M_contig1328.2514.1	-0.448522	0.267918	0.477624	2.05019	2.91685	0.752452	0.590593	unbiased
Dictyota dichotoma	prot_D-dichotoma_M_contig1329.2517.1	1.10645	0.756004	0.557392	1.83577	0.919596	1.72464	0.775915	unbiased
Dictyota dichotoma	prot_D-dichotoma_M_contig1329.2519.1	0.103611	1.52849	0.9908	0.765856	0.731702	1.52411	0.883137	not_expressed
Dictyota dichotoma	prot_D-dichotoma_M_contig1329.2525.1	-0.0938275	0.753391	0.980896	1.28085	1.48341	1.24204	1.25949	unbiased
Dictyota dichotoma	prot_D-dichotoma_M_contig1330.2545.1	0.16641	1.37762	0.981084	1.25446	1.1612	1.4655	0.742637	unbiased
Dictyota dichotoma	prot_D-dichotoma_M_contig2557.8792.1	-0.0251155	3.25789		0.0348808	0.0492919	0.0787513	0.11022	not_expressed
Dictyota dichotoma	prot_D-dichotoma_M_contig2557.8793.1	1.02476	0.543895	0.394618	84.515	47.0302	72.7533	19.1823	unbiased
Dictyota dichotoma	prot_D-dichotoma_M_contig2563.8814.1				0	0	0	0	not_expressed
Dictyota dichotoma	prot_D-dichotoma_M_contig2563.8815.1	0.549367	3.25801		0.0208912	0	0.0660636	0	not_expressed
Dictyota dichotoma	prot_D-dichotoma_M_contig2565.8819.1	0.031643	0.405515	0.98965	9.96041	9.75855	6.07631	5.30543	unbiased
Dictyota dichotoma	prot_D-dichotoma_M_contig805.18910.1	-0.460384	0.630194	0.817679	34.4298	48.037	21.5655	59.2867	unbiased
Dictyota dichotoma	prot_D-dichotoma_M_contig806.18915.1	-2.34142	3.17647		0.0213827	0.277733	0.0676179	0.397816	not_expressed
Dictyota dichotoma	prot_D-dichotoma_M_contig857.19340.1	0.0211855	0.263328	0.98965	42.4869	45.9795	11.286	14.3401	unbiased
Dictyota dichotoma	prot_D-dichotoma_M_contig857.19343.1	0.558525	0.628974	0.765952	2.70688	1.95721	2.72391	2.23893	unbiased
Dictyota dichotoma	prot_D-dichotoma_M_contig857.19344.1	0.208785	0.696469	0.943092	1.57674	1.40083	1.87492	0.845806	unbiased
Dictyota dichotoma	prot_D-dichotoma_M_contig858.19352.1	-0.290639	0.706939	0.914308	14.1538	17.9648	17.8736	6.9956	unbiased
Dictyota dichotoma	prot_D-dichotoma_M_contig858.19354.1	0.0702463	0.222897	0.939421	65.1092	66.7506	13.9917	12.6443	unbiased
Dictyota dichotoma	prot_D-dichotoma_M_contig858.19357.1	-0.551415	0.291806	0.392442	11.8738	17.7727	3.73274	7.99167	unbiased
Dictyota dichotoma	prot_D-dichotoma_M_contig860.19377.1	0.722483	0.912483	0.797536	2.78316	1.82998	3.181	2.3899	unbiased
Dictyota dichotoma	prot_D-dichotoma_M_contig860.19378.1	0.937475	1.35532	0.828964	1.02632	0.584456	1.27289	0.903385	unbiased
Dictyota dichotoma	prot_D-dichotoma_M_contig860.19379.1	0.542837	1.26206	0.908526	2.4545	1.84423	3.17262	2.85987	unbiased
Dictyota dichotoma	prot_D-dichotoma_M_contig860.19380.1	0.72065	0.944329	0.806178	1.71306	1.10932	1.9354	1.59712	unbiased
Dictyota dichotoma	prot_D-dichotoma_M_contig860.19381.1	0.513031	1.28485	0.917814	0.887385	0.673885	1.09977	1.251	not_expressed
Dictyota dichotoma	prot_D-dichotoma_M_contig1088.757.1	1.0503	0.765948	0.591948	1.18049	0.579942	1.20318	0.380664	unbiased
Dictyota dichotoma	prot_D-dichotoma_M_contig1089.760.1	-2.54629	1.87308	0.59514	0.124767	0.858968	0.229627	1.07361	not_expressed
Dictyota dichotoma	prot_D-dichotoma_M_contig1089.762.1	0.256098	1.63913	0.97501	0.112371	0.107593	0.148773	0.147348	not_expressed
Dictyota dichotoma	prot_D-dichotoma_M_contig1090.794.1	0.433481	1.57545	0.947943	0.193677	0.166086	0.227138	0.151843	not_expressed
Dictyota dichotoma	prot_D-dichotoma_M_contig1090.795.1	1.12902	3.25789		0.0371097	0	0.117351	0	not_expressed
Dictyota dichotoma	prot_D-dichotoma_M_contig1090.796.1	1.12902	3.25789		0.0495567	0	0.156712	0	not_expressed
Dictyota dichotoma	prot_D-dichotoma_M_contig1091.799.1	-0.238061	2.11904	0.983037	0.0775678	0.0995047	0.149838	0.18155	not_expressed
Dictyota dichotoma	prot_D-dichotoma_M_contig1091.800.1	0.203747	0.224994	0.760188	20.0355	18.7995	5.47766	6.61155	unbiased
Dictyota dichotoma	prot_D-dichotoma_M_contig1091.801.1	-0.174844	0.293	0.858844	16.3615	19.6423	6.69588	8.38295	unbiased
Dictyota dichotoma	prot_D-dichotoma_M_contig1091.802.1	-0.194729	0.313606	0.851461	7.20915	8.8932	3.0186	4.50421	unbiased
Dictyota dichotoma	prot_D-dichotoma_M_contig1093.815.1	1.49827	0.559622	0.139371	19.7936	7.61679	15.9977	1.77267	unbiased
Dictyota dichotoma	prot_D-dichotoma_M_contig3721.12464.1	-0.618266	1.15948	0.880477	0.435331	0.688058	0.457903	0.514746	not_expressed
Dictyota dichotoma	prot_D-dichotoma_M_contig3723.12466.1	1.12902	3.25789		0.058636	0	0.09534	0	not_expressed
Dictyota dichotoma	prot_D-dichotoma_M_contig3724.12467.1	0.0996915	0.677603	0.977808	0.524483	0.505906	0.295205	0.325562	not_expressed
Dictyota dichotoma	prot_D-dichotoma_M_contig3726.12469.1	-0.730385	0.743264	0.734358	3.14155	5.71372	4.04934	3.4671	unbiased
Dictyota dichotoma	prot_D-dichotoma_M_contig3730.12481.1	-1.22999	0.71381	0.455449	0.583864	1.39799	0.509754	1.02263	unbiased
Dictyota dichotoma	prot_D-dichotoma_M_contig3736.12489.1	-1.70313	0.937133	0.421074	2.13757	7.22045	2.29893	6.32245	unbiased
Dictyota dichotoma	prot_D-dichotoma_M_contig3736.12490.1	0.12693	0.415448	0.941774	0.344505	0.327117	0.123061	0.159381	not_expressed
Dictyota dichotoma	prot_D-dichotoma_M_contig3736.12491.1	-0.515811	0.537506	0.742464	0.972878	1.4738	0.590476	0.859653	unbiased
Dictyota dichotoma	prot_D-dichotoma_M_contig3738.12492.1	-0.407015	0.270682	0.541275	53.6817	75.0656	13.1844	31.7411	unbiased
Dictyota dichotoma	prot_D-dichotoma_M_contig2255.7554.1	0.322211	0.809821	0.917953	1.02185	0.857261	0.957139	0.785513	unbiased
Dictyota dichotoma	prot_D-dichotoma_M_contig2255.7555.1	-0.426272	0.930048	0.901614	1.00515	1.55203	1.21707	1.38447	unbiased
Dictyota dichotoma	prot_D-dichotoma_M_contig2255.7557.1	0.319152	0.581016	0.875722	2.14171	1.93211	1.83714	0.80038	unbiased
Dictyota dichotoma	prot_D-dichotoma_M_contig2264.7593.1	1.5538	3.25461		0.0790619	0	0.140482	0	not_expressed
Dictyota dichotoma	prot_D-dichotoma_M_contig2019.6406.1	5.4258	1.60325	0.0358104	1.1915	0.0308349	1.83168	0.068949	GA_specific
Dictyota dichotoma	prot_D-dichotoma_M_contig2020.6424.1	0.582269	0.487677	0.656265	186.606	121.294	59.8477	114.622	unbiased
Dictyota dichotoma	prot_D-dichotoma_M_contig2023.6436.1	-2.01921	3.17762		0.054239	0.282191	0.171519	0.515116	not_expressed
Dictyota dichotoma	prot_D-dichotoma_M_contig2023.6437.1	-2.04044	1.30198	0.519528	0.157068	0.673476	0.174366	0.471361	not_expressed
Dictyota dichotoma	prot_D-dichotoma_M_contig2027.6447.1	0.174062	0.372286	0.899346	421.725	386.209	166.884	258.018	unbiased
Dictyota dichotoma	prot_D-dichotoma_M_contig286.9860.1	1.949	1.92551		0.133869	0.0278147	0.200002	0.0621957	not_expressed
Dictyota dichotoma	prot_D-dichotoma_M_contig3573.12045.1	-2.42351	1.0172	0.216683	0.20346	1.06747	0.306567	0.86851	unbiased
Dictyota dichotoma	prot_D-dichotoma_M_contig3574.12046.1	0.0123056	0.56944	0.996717	1.76664	1.73482	1.20747	1.39903	unbiased
Dictyota dichotoma	prot_D-dichotoma_M_contig3574.12047.1	0.464863	0.724176	0.846095	2.593	1.80722	2.07675	1.14463	unbiased
Dictyota dichotoma	prot_D-dichotoma_M_contig3577.12052.1	0.559079	0.50728	0.690922	9.82435	7.06442	7.19691	4.15151	unbiased
Dictyota dichotoma	prot_D-dichotoma_M_contig3579.12054.1	0.0512498	0.493852	0.984574	10.1363	9.77897	8.08438	4.2683	unbiased
Dictyota dichotoma	prot_D-dichotoma_M_contig1083.712.1	-0.0277005	3.25801		0.01503	0.030821	0.047529	0.0689178	not_expressed
Dictyota dichotoma	prot_D-dichotoma_M_contig1085.731.1	0.0522854	0.938284	0.992509	0.273323	0.274061	0.203157	0.313917	not_expressed
Dictyota dichotoma	prot_D-dichotoma_M_contig1085.734.1	-0.286009	0.20596	0.586015	11.6971	15.0219	3.4585	5.51893	unbiased
Dictyota dichotoma	prot_D-dichotoma_M_contig1086.736.1	-2.189	1.03385	0.308054	0.386536	1.83609	0.39179	1.47066	unbiased
Dictyota dichotoma	prot_D-dichotoma_M_contig1086.737.1	-0.693011	0.672593	0.716263	0.642084	1.10599	0.338755	0.717442	unbiased
Dictyota dichotoma	prot_D-dichotoma_M_contig2302.7802.1	-0.173949	0.350995	0.891112	2.1543	2.6062	0.581778	1.16553	unbiased
Dictyota dichotoma	prot_D-dichotoma_M_contig2304.7806.1	0.949538	0.691353	0.590984	2.22152	1.18312	1.72493	0.80305	unbiased
Dictyota dichotoma	prot_D-dichotoma_M_contig2305.7807.1	2.34512	2.98605		0.104194	0	0.157503	0	not_expressed
Dictyota dichotoma	prot_D-dichotoma_M_contig2307.7809.1	-0.0442546	0.43447	0.984667	1.67431	1.81886	0.95498	0.844494	unbiased
Dictyota dichotoma	prot_D-dichotoma_M_contig160.4188.1	-1.14706	0.627486	0.416117	7.24558	17.3033	7.86606	17.3446	unbiased
Dictyota dichotoma	prot_D-dichotoma_M_contig160.4189.1	0.210632	0.24394	0.774462	39.8922	36.7538	12.8049	18.9122	unbiased
Dictyota dichotoma	prot_D-dichotoma_M_contig160.4196.1	-0.30675	0.539234	0.870716	3.28758	4.35123	3.67976	1.79165	unbiased
Dictyota dichotoma	prot_D-dichotoma_M_contig201.6368.1	0.915569	0.85584	0.703907	6.16869	3.19221	4.81315	4.27174	unbiased
Dictyota dichotoma	prot_D-dichotoma_M_contig201.6369.1	0.122543	0.811197	0.977041	9.13223	8.07049	5.35981	15.3637	unbiased
Dictyota dichotoma	prot_D-dichotoma_M_contig201.6375.1	0.0843645	0.290816	0.94557	12.4094	12.2902	4.75921	4.70921	unbiased
Dictyota dichotoma	prot_D-dichotoma_M_contig201.6381.1	-0.668037	0.334023	0.351534	25.6276	42.5501	11.6255	17.3711	unbiased
Dictyota dichotoma	prot_D-dichotoma_M_contig362.12184.1	-0.213791	0.410864	0.885329	11.6405	13.9102	6.06776	4.548	unbiased
Dictyota dichotoma	prot_D-dichotoma_M_contig362.12186.1	1.22721	0.8182	0.54255	1.33746	0.586066	1.28171	0.555496	unbiased
Dictyota dichotoma	prot_D-dichotoma_M_contig364.12231.1	-0.16203	0.312465	0.885708	4.90693	5.74176	2.34557	2.36259	unbiased
Dictyota dichotoma	prot_D-dichotoma_M_contig142.3079.1	1.37252	0.945616	0.562469	0.765925	0.320238	0.42676	0.403231	not_expressed
Dictyota dichotoma	prot_D-dichotoma_M_contig142.3082.1	0.584331	0.234613	0.184136	89.3595	61.6314	36.7417	11.4535	unbiased
Dictyota dichotoma	prot_D-dichotoma_M_contig142.3083.1	0.197573	1.09378	0.970396	0.438509	0.399061	0.416146	0.435961	not_expressed
Dictyota dichotoma	prot_D-dichotoma_M_contig143.3136.1	-4.21089	1.01675	0.00401469	0.489097	9.80046	0.513079	13.3036	SP_specific
Dictyota dichotoma	prot_D-dichotoma_M_contig143.3145.1	-0.198743	0.829554	0.95694	0.496324	0.622237	0.576561	0.252061	not_expressed
Dictyota dichotoma	prot_D-dichotoma_M_contig143.3147.1	-0.389103	0.217494	0.429836	47.958	65.5266	13.6688	17.8396	unbiased
Dictyota dichotoma	prot_D-dichotoma_M_contig80.18868.1	3.42878	1.227	0.115327	0.425624	0.0413101	0.440564	0.0923722	not_expressed
Dictyota dichotoma	prot_D-dichotoma_M_contig176.5075.1	0.423309	0.69974	0.856733	2.45465	1.98259	2.61972	2.19434	unbiased
Dictyota dichotoma	prot_D-dichotoma_M_contig176.5085.1	2.23207	2.45816		0.138071	0.023114	0.269941	0.0516844	not_expressed
Dictyota dichotoma	prot_D-dichotoma_M_contig177.5116.1	-0.219465	1.36701	0.974358	23.388	28.5994	30.64	8.11126	unbiased
Dictyota dichotoma	prot_D-dichotoma_M_contig177.5118.1	-0.124289	1.38598	0.986487	16.4717	18.3581	18.9806	5.03684	unbiased
Dictyota dichotoma	prot_D-dichotoma_M_contig177.5119.1	0.184254	0.958099	0.968073	3.02186	2.75136	3.16594	0.770118	unbiased
Dictyota dichotoma	prot_D-dichotoma_M_contig177.5120.1	-0.194796	0.559016	0.930659	3.06646	3.64277	2.3664	0.644812	unbiased
Dictyota dichotoma	prot_D-dichotoma_M_contig177.5124.1	-0.185481	1.56567	0.981863	14.6878	17.6897	15.4995	4.09007	unbiased
Dictyota dichotoma	prot_D-dichotoma_M_contig177.5125.1	0.170845	1.36777	0.980887	39.2158	35.814	45.5059	11.0347	unbiased
Dictyota dichotoma	prot_D-dichotoma_M_contig178.5167.1	0.518219	0.323005	0.506224	4.67476	3.2844	1.92534	1.31245	unbiased
Dictyota dichotoma	prot_D-dichotoma_M_contig178.5170.1	0.00659659	0.627051	0.998747	1.43913	1.48368	1.14413	0.620815	unbiased
Dictyota dichotoma	prot_D-dichotoma_M_contig178.5171.1	-0.103953	0.954908	0.984041	0.863464	0.925702	1.02709	1.00165	not_expressed
Dictyota dichotoma	prot_D-dichotoma_M_contig1788.5196.1	0.0582528	1.16899	0.99329	0.183501	0.181224	0.147276	0.173432	not_expressed
Dictyota dichotoma	prot_D-dichotoma_M_contig1789.5197.1	0.254204	0.414499	0.854004	13.7159	11.7413	7.48129	5.91602	unbiased
Dictyota dichotoma	prot_D-dichotoma_M_contig1789.5198.1	2.14842	0.833817	0.162574	0.802383	0.184496	1.30711	0.0536621	not_expressed
Dictyota dichotoma	prot_D-dichotoma_M_contig1789.5199.1	-0.00406246	0.179302	0.996467	72.8972	77.453	13.6206	17.6695	unbiased
Dictyota dichotoma	prot_D-dichotoma_M_contig1792.5216.1	-0.0393761	0.713804	0.992645	0.590684	0.67857	0.647954	0.582863	not_expressed
Dictyota dichotoma	prot_D-dichotoma_M_contig1793.5219.1	0.129597	0.266119	0.893876	266.808	252.808	81.0312	81.1192	unbiased
Dictyota dichotoma	prot_D-dichotoma_M_contig511.15512.1	0.0714343	0.385291	0.969805	4.82838	4.75106	2.65646	2.20536	unbiased
Dictyota dichotoma	prot_D-dichotoma_M_contig511.15517.1	-0.643999	2.39608	0.949711	0.132981	0.244479	0.281581	0.472819	not_expressed
Dictyota dichotoma	prot_D-dichotoma_M_contig511.15522.1	-0.0644446	0.196294	0.935777	27.3536	30.3084	6.78575	8.37952	unbiased
Dictyota dichotoma	prot_D-dichotoma_M_contig512.15532.1	1.10234	2.30616		0.0585794	0.0234582	0.0633817	0.0524542	not_expressed
Dictyota dichotoma	prot_D-dichotoma_M_contig512.15533.1	0.254621	1.18919	0.964039	0.684043	0.538661	0.663819	1.0128	not_expressed
Dictyota dichotoma	prot_D-dichotoma_M_contig512.15538.1	-0.662284	0.519198	0.628122	2.73372	4.42926	2.28187	1.32949	unbiased
Dictyota dichotoma	prot_D-dichotoma_M_contig513.15545.1	0.346666	0.190846	0.421229	17.1083	14.2132	3.67486	3.38718	unbiased
Dictyota dichotoma	prot_D-dichotoma_M_contig513.15546.1	-0.346465	0.339125	0.719336	8.14397	11.3361	1.82477	7.29516	unbiased
Dictyota dichotoma	prot_D-dichotoma_M_contig513.15548.1	-1.36098	0.546043	0.1834	1.64256	4.25656	1.14876	2.79654	unbiased
Dictyota dichotoma	prot_D-dichotoma_M_contig3652.12269.1	-0.688619	0.390272	0.441225	8.00049	13.1041	5.12794	6.65309	unbiased
Dictyota dichotoma	prot_D-dichotoma_M_contig3662.12296.1	-0.490905	0.221709	0.272556	26.7681	39.977	3.1548	17.2417	unbiased
Dictyota dichotoma	prot_D-dichotoma_M_contig3663.12298.1	2.12855	1.3694	0.523084	1.92829	0.183589	3.84598	0.223359	unbiased
Dictyota dichotoma	prot_D-dichotoma_M_contig3668.12305.1	-0.604768	3.25801		0.0125008	0.052475	0.039531	0.117338	not_expressed
Dictyota dichotoma	prot_D-dichotoma_M_contig3668.12306.1	3.99779	1.62347	0.190517	0.33423	0	0.318817	0	not_expressed
Dictyota dichotoma	prot_D-dichotoma_M_contig3668.12307.1	1.9748	0.751057	0.150368	1.70839	0.443645	0.960276	0.588596	unbiased
Dictyota dichotoma	prot_D-dichotoma_M_contig3669.12308.1	0.0534112	0.25738	0.965807	10.4501	10.7318	3.51297	3.77046	unbiased
Dictyota dichotoma	prot_D-dichotoma_M_contig3672.12311.1	1.48449	0.904905	0.490043	1.51606	0.579315	1.41933	0.706337	unbiased
Dictyota dichotoma	prot_D-dichotoma_M_contig36.12107.1	-0.6961	0.488306	0.572636	4.86173	8.0876	4.30429	3.69903	unbiased
Dictyota dichotoma	prot_D-dichotoma_M_contig36.12119.1	0.15836	0.224176	0.826453	18.1595	17.5408	4.11304	3.72825	unbiased
Dictyota dichotoma	prot_D-dichotoma_M_contig37.12403.1	-0.737533	1.24183	0.860225	15.9745	25.3755	28.7323	22.6126	unbiased
Dictyota dichotoma	prot_D-dichotoma_M_contig137.2749.1	-1.80929	1.29015	0.581728	0.177665	0.640357	0.229923	0.567538	not_expressed
Dictyota dichotoma	prot_D-dichotoma_M_contig138.2795.1	0.574203	0.24739	0.233869	14.3963	10.3114	3.54242	2.81067	unbiased
Dictyota dichotoma	prot_D-dichotoma_M_contig138.2801.1	-0.125475	0.185669	0.836405	23.6172	27.2255	7.18612	7.61551	unbiased
Dictyota dichotoma	prot_D-dichotoma_M_contig138.2804.1	-0.00252171	0.376264	0.998747	2.3312	2.47711	0.743006	1.23993	unbiased
Dictyota dichotoma	prot_D-dichotoma_M_contig139.2867.1	0.242613	0.481515	0.888992	3.51523	3.02875	1.9107	2.27275	unbiased
Dictyota dichotoma	prot_D-dichotoma_M_contig139.2868.1	0.192926	0.511509	0.923259	3.07675	2.88187	1.78154	1.47368	unbiased
Dictyota dichotoma	prot_D-dichotoma_M_contig139.2870.1	1.75022	3.2501		0.0539705	0	0.0887695	0	not_expressed
Dictyota dichotoma	prot_D-dichotoma_M_contig139.2872.1	2.43736	2.95251		0.133675	0	0.223278	0	not_expressed
Dictyota dichotoma	prot_D-dichotoma_M_contig139.2873.1	0.549367	3.25801		0.00484205	0	0.0153119	0	not_expressed
Dictyota dichotoma	prot_D-dichotoma_M_contig4902.15103.1	-0.56188	0.863876	0.843402	0.890451	1.34331	0.449109	1.77916	unbiased
Dictyota dichotoma	prot_D-dichotoma_M_contig4905.15105.1	2.11911	2.22146		0.0963142	0	0.0990759	0	not_expressed
Dictyota dichotoma	prot_D-dichotoma_M_contig4910.15115.1	-0.0388762	0.840861	0.993351	1.17213	1.27506	1.12628	0.815004	unbiased
Dictyota dichotoma	prot_D-dichotoma_M_contig4910.15117.1	0.56642	0.636256	0.765182	1.54127	1.06918	1.25118	0.500221	unbiased
Dictyota dichotoma	prot_D-dichotoma_M_contig4914.15122.1	-0.0592916	0.548268	0.984041	186.178	192.986	141.221	45.6974	unbiased
Dictyota dichotoma	prot_D-dichotoma_M_contig4914.15123.1	-0.490697	0.507599	0.740688	10.0156	14.3519	6.60337	5.2308	unbiased
Dictyota dichotoma	prot_D-dichotoma_M_contig4914.15124.1	-0.205186	0.666275	0.94105	1.56008	1.74356	1.68806	1.1897	unbiased
Dictyota dichotoma	prot_D-dichotoma_M_contig4916.15127.1	-1.18429	1.58083	0.810675	0.167735	0.377855	0.239288	0.432239	not_expressed
Dictyota dichotoma	prot_D-dichotoma_M_contig4918.15130.1	-0.602172	0.559382	0.701068	3.09767	5.2214	1.51599	6.4886	unbiased
Dictyota dichotoma	prot_D-dichotoma_M_contig4919.15131.1				0	0	0	0	not_expressed
Dictyota dichotoma	prot_D-dichotoma_M_contig4934.15150.1				0	0	0	0	not_expressed
Dictyota dichotoma	prot_D-dichotoma_M_contig4934.15152.1	-0.638385	1.3899		6.18381	5.05066	11.1371	9.01673	unbiased
Dictyota dichotoma	prot_D-dichotoma_M_contig4936.15157.1	-0.448187	0.917759	0.893303	184.737	265.49	135.43	97.1362	unbiased
Dictyota dichotoma	prot_D-dichotoma_M_contig4936.15159.1	-0.377716	0.341028	0.689893	5.2697	7.25926	1.66294	4.20261	unbiased
Dictyota dichotoma	prot_D-dichotoma_M_contig4034.13245.1	3.31758	1.80876	0.414224	0.890421	0.0467413	1.71153	0.0766159	not_expressed
Dictyota dichotoma	prot_D-dichotoma_M_contig4036.13249.1	1.0828	0.650808	0.481068	107.669	54.8819	113.449	23.4575	unbiased
Dictyota dichotoma	prot_D-dichotoma_M_contig4036.13250.1	0.773466	0.526926	0.55571	81.2201	49.5661	68.522	25.4511	unbiased
Dictyota dichotoma	prot_D-dichotoma_M_contig4039.13254.1	0.750994	1.79845	0.912068	0.201245	0.139877	0.250748	0.238231	not_expressed
Dictyota dichotoma	prot_D-dichotoma_M_contig4043.13269.1	1.4447	1.1204	0.622418	0.669181	0.234499	0.684381	0.328456	not_expressed
Dictyota dichotoma	prot_D-dichotoma_M_contig4045.13273.1	0.817175	0.539684	0.537595	8.56409	5.04661	5.76732	2.9965	unbiased
Dictyota dichotoma	prot_D-dichotoma_M_contig1754.5059.1	0.139915	0.284463	0.892377	7.10322	6.98438	2.19761	3.63254	unbiased
Dictyota dichotoma	prot_D-dichotoma_M_contig13.2281.1	0.0519533	0.249943	0.965807	50.1703	50.7523	10.7471	19.9886	unbiased
Dictyota dichotoma	prot_D-dichotoma_M_contig13.2294.1	0.390706	0.382603	0.719672	3.17637	2.5319	1.52015	0.649199	unbiased
Dictyota dichotoma	prot_D-dichotoma_M_contig13.2325.1	0.0228079	0.436492	0.992885	2.09876	2.16192	1.03352	1.22365	unbiased
Dictyota dichotoma	prot_D-dichotoma_M_contig93.20039.1	1.12902	3.25789		0.0433319	0	0.0987346	0	not_expressed
Dictyota dichotoma	prot_D-dichotoma_M_contig94.20124.1	-0.413906	0.181883	0.248096	7.99137	11.4767	1.68585	3.99682	unbiased
Dictyota dichotoma	prot_D-dichotoma_M_contig94.20127.1				0	0	0	0	not_expressed
Dictyota dichotoma	prot_D-dichotoma_M_contig94.20130.1	0.989284	0.661549	0.54472	10.6222	5.84592	10.2212	7.63568	unbiased
Dictyota dichotoma	prot_D-dichotoma_M_contig94.20137.1	-0.264752	0.733695	0.927832	1.28592	1.61194	1.18753	0.832505	unbiased
Dictyota dichotoma	prot_D-dichotoma_M_contig772.18584.1	-0.0277005	3.25801		0.00925727	0.0245769	0.029274	0.0549556	not_expressed
Dictyota dichotoma	prot_D-dichotoma_M_contig772.18585.1	1.12902	3.25789		0.0839817	0	0.182382	0	not_expressed
Dictyota dichotoma	prot_D-dichotoma_M_contig773.18594.1	0.375754	0.567412	0.839219	1.61725	1.2899	1.05277	0.731855	unbiased
Dictyota dichotoma	prot_D-dichotoma_M_contig774.18602.1	-0.956074	0.351897	0.130882	4.5285	9.09096	2.14494	2.22035	unbiased
Dictyota dichotoma	prot_D-dichotoma_M_contig628.17182.1	0.134491	0.336843	0.917814	11.2426	11.0597	4.99199	4.28444	unbiased
Dictyota dichotoma	prot_D-dichotoma_M_contig629.17184.1	0.0910349	0.857675	0.984181	0.497484	0.479377	0.475322	0.386935	not_expressed
Dictyota dichotoma	prot_D-dichotoma_M_contig629.17188.1	-0.700208	0.372982	0.398383	47.3326	82.2915	19.6005	40.8719	unbiased
Dictyota dichotoma	prot_D-dichotoma_M_contig629.17190.1	1.64525	3.25244		0.0563156	0	0.0999118	0	not_expressed
Dictyota dichotoma	prot_D-dichotoma_M_contig629.17191.1	2.88326	1.594	0.423917	0.493684	0.067951	0.569433	0.151943	not_expressed
Dictyota dichotoma	prot_D-dichotoma_M_contig629.17195.1	1.49773	1.44112	0.71334	2.29059	0.833015	3.16154	0.792399	unbiased
Dictyota dichotoma	prot_D-dichotoma_M_contig629.17196.1	1.06969	1.40789	0.807101	1.74232	0.831052	2.7785	1.29083	unbiased
Dictyota dichotoma	prot_D-dichotoma_M_contig629.17197.1	0.954051	0.805544	0.660741	58.4949	31.4888	62.0577	21.3929	unbiased
Dictyota dichotoma	prot_D-dichotoma_M_contig630.17234.1	0.406854	0.515779	0.797965	1.61595	1.27341	0.92722	0.499548	unbiased
Dictyota dichotoma	prot_D-dichotoma_M_contig630.17238.1	-0.439319	0.372462	0.66167	1.75501	2.47469	0.95002	0.956647	unbiased
Dictyota dichotoma	prot_D-dichotoma_M_contig630.17241.1	0.563585	1.48691	0.922682	0.25298	0.197641	0.281135	0.269053	not_expressed
Dictyota dichotoma	prot_D-dichotoma_M_contig631.17248.1	0.837903	3.25801		0.0354221	0	0.0753574	0	not_expressed
Dictyota dichotoma	prot_D-dichotoma_M_contig631.17249.1	0.549367	3.25801		0.02285	0	0.0722579	0	not_expressed
Dictyota dichotoma	prot_D-dichotoma_M_contig631.17250.1				0	0	0	0	not_expressed
Dictyota dichotoma	prot_D-dichotoma_M_contig631.17251.1	0.549367	3.25801		0.00880545	0	0.0278453	0	not_expressed
Dictyota dichotoma	prot_D-dichotoma_M_contig3323.11413.1	0.297945	0.735818	0.916228	4.52112	3.91234	4.14117	2.61416	unbiased
Dictyota dichotoma	prot_D-dichotoma_M_contig3324.11415.1	0.175747	0.581539	0.942726	1.04627	1.01375	0.617617	0.753163	unbiased
Dictyota dichotoma	prot_D-dichotoma_M_contig3331.11438.1	0.210917	0.438538	0.895618	3.70009	3.27103	2.13379	0.341656	unbiased
Dictyota dichotoma	prot_D-dichotoma_M_contig1205.1660.1	-0.639897	0.96024	0.838738	0.305603	0.511971	0.243023	0.594145	not_expressed
Dictyota dichotoma	prot_D-dichotoma_M_contig1205.1663.1	-1.21384	0.895343	0.59576	0.123605	0.288299	0.0695265	0.184856	not_expressed
Dictyota dichotoma	prot_D-dichotoma_M_contig1206.1667.1	0.19332	0.573078	0.934412	2.32949	2.13117	2.61028	0.871629	unbiased
Dictyota dichotoma	prot_D-dichotoma_M_contig1208.1683.1	-0.681471	0.290054	0.224517	22.3529	39.3546	5.49952	29.0425	unbiased
Dictyota dichotoma	prot_D-dichotoma_M_contig1210.1702.1	-0.236037	0.286866	0.789441	9.87713	12.5633	3.27932	4.90507	unbiased
Dictyota dichotoma	prot_D-dichotoma_M_contig902.19788.1	-1.22699	0.508421	0.20672	2.43961	5.94337	1.90808	2.65014	unbiased
Dictyota dichotoma	prot_D-dichotoma_M_contig903.19792.1	-0.096693	0.455452	0.96455	8.75156	9.75009	6.07423	4.47263	unbiased
Dictyota dichotoma	prot_D-dichotoma_M_contig903.19794.1	-0.557035	0.388428	0.568606	4.22758	6.46383	2.24638	2.83875	unbiased
Dictyota dichotoma	prot_D-dichotoma_M_contig903.19796.1	0.411164	0.284866	0.565336	27.6317	22.4794	8.43883	12.2464	unbiased
Dictyota dichotoma	prot_D-dichotoma_M_contig904.19801.1	1.12163	0.654296	0.460177	0.624208	0.305603	0.229649	0.304691	not_expressed
Dictyota dichotoma	prot_D-dichotoma_M_contig2997.10340.1				0	0	0	0	not_expressed
Dictyota dichotoma	prot_D-dichotoma_M_contig2997.10341.1	0.549367	3.25801		0.0165189	0	0.0522373	0	not_expressed
Dictyota dichotoma	prot_D-dichotoma_M_contig3008.10440.1	0.837903	3.25801		0.0290994	0	0.0616686	0	not_expressed
Dictyota dichotoma	prot_D-dichotoma_M_contig3009.10441.1	-0.0845456	0.748345	0.983013	37.5826	41.45	36.9213	36.2712	unbiased
Dictyota dichotoma	prot_D-dichotoma_M_contig3009.10442.1	0.663	0.507033	0.614467	1.94067	1.28963	1.05038	0.658012	unbiased
Dictyota dichotoma	prot_D-dichotoma_M_contig460.14515.1	-0.612286	0.587719	0.712757	148.965	250.22	108.557	218.977	unbiased
Dictyota dichotoma	prot_D-dichotoma_M_contig460.14516.1	-0.56151	0.423445	0.607517	10.367	16.0161	6.04042	7.83682	unbiased
Dictyota dichotoma	prot_D-dichotoma_M_contig461.14536.1	1.23328	0.755032	0.493576	1.0209	0.481965	0.939735	0.172595	unbiased
Dictyota dichotoma	prot_D-dichotoma_M_contig462.14551.1	-0.628277	0.283457	0.271829	31.4248	50.5367	6.7658	27.579	unbiased
Dictyota dichotoma	prot_D-dichotoma_M_contig22.7309.1	-0.154959	0.162229	0.743026	19.6813	23.3381	3.71508	5.4294	unbiased
Dictyota dichotoma	prot_D-dichotoma_M_contig22.7310.1	1.66866	1.11988	0.545546	7.07998	2.56433	9.53647	2.51602	unbiased
Dictyota dichotoma	prot_D-dichotoma_M_contig22.7315.1	-0.0844517	0.199742	0.911076	8.68493	9.77032	1.81735	3.66048	unbiased
Dictyota dichotoma	prot_D-dichotoma_M_contig22.7317.1	-0.275575	0.228953	0.653138	4.90984	6.2059	1.93027	1.23183	unbiased
Dictyota dichotoma	prot_D-dichotoma_M_contig22.7322.1	21.6305	3.19464	1.34874e-08	8.74656	0	19.3321	0	GA_specific
Dictyota dichotoma	prot_D-dichotoma_M_contig22.7333.1				0	0	0	0	not_expressed
Dictyota dichotoma	prot_D-dichotoma_M_contig78.18631.1	-0.224516	0.319309	0.82745	17.0477	20.6084	5.93977	8.20249	unbiased
Dictyota dichotoma	prot_D-dichotoma_M_contig78.18636.1	-0.125357	0.344973	0.926783	7.04928	7.97336	3.4313	2.67287	unbiased
Dictyota dichotoma	prot_D-dichotoma_M_contig79.18716.1	0.181917	0.231987	0.79969	86.3759	79.8022	19.2885	14.0332	unbiased
Dictyota dichotoma	prot_D-dichotoma_M_contig79.18719.1	-4.85595	0.958447		0.58405	17.2983	0.76895	33.7047
Dictyota dichotoma	prot_D-dichotoma_M_contig749.18328.1	0.603804	0.533421	0.681471	9.71887	6.51914	9.7427	3.08999	unbiased
Dictyota dichotoma	prot_D-dichotoma_M_contig750.18350.1	0.637568	0.512678	0.63942	1.6778	1.11516	0.534527	0.698072	unbiased
Dictyota dichotoma	prot_D-dichotoma_M_contig751.18355.1	0.680293	0.527903	0.622548	1.36069	0.960165	0.616973	1.20485	unbiased
Dictyota dichotoma	prot_D-dichotoma_M_contig751.18359.1	0.0692216	0.483697	0.978295	44.6583	42.032	36.8533	16.9051	unbiased
Dictyota dichotoma	prot_D-dichotoma_M_contig752.18363.1	-0.301791	0.505414	0.858735	64.0395	80.7869	38.1862	59.7661	unbiased
Dictyota dichotoma	prot_D-dichotoma_M_contig752.18373.1	-0.709105	0.469725	0.539411	8.81497	15.0117	3.20544	12.7373	unbiased
Dictyota dichotoma	prot_D-dichotoma_M_contig2947.10182.1	0.789256	0.524903	0.541275	2.10691	1.28194	0.970026	0.888047	unbiased
Dictyota dichotoma	prot_D-dichotoma_M_contig2953.10204.1	1.12086	0.72728	0.527592	13.3943	6.64413	13.2776	5.16715	unbiased
Dictyota dichotoma	prot_D-dichotoma_M_contig2959.10212.1	2.26239	0.905054	0.181765	1.59076	0.366018	1.28581	0.310668	unbiased
Dictyota dichotoma	prot_D-dichotoma_M_contig2961.10231.1	5.29167	1.92079	0.123534	0.727986	0	1.17539	0	not_expressed
Dictyota dichotoma	prot_D-dichotoma_M_contig3304.11373.1	-0.0733503	0.329499	0.96223	39.241	41.9824	14.7411	20.3978	unbiased
Dictyota dichotoma	prot_D-dichotoma_M_contig3304.11374.1	-0.617186	1.15844	0.880701	14.9351	25.4613	22.9133	22.6812	unbiased
Dictyota dichotoma	prot_D-dichotoma_M_contig3310.11387.1	-0.556632	0.332765	0.477833	4.57415	7.21895	1.91467	3.39402	unbiased
Dictyota dichotoma	prot_D-dichotoma_M_contig3316.11398.1	-2.4224	1.12025	0.291095	0.237312	1.34623	0.314488	1.23468	unbiased
Dictyota dichotoma	prot_D-dichotoma_M_contig3319.11401.1	-0.27319	0.202338	0.598054	37.2323	48.1572	9.00446	16.8666	unbiased
Dictyota dichotoma	prot_D-dichotoma_M_contig59.16752.1	0.300601	0.349618	0.77553	36.1482	31.9249	15.1647	14.4167	unbiased
Dictyota dichotoma	prot_D-dichotoma_M_contig59.16756.1	-0.00799823	0.269507	0.99558	57.6268	61.9633	14.3124	23.8772	unbiased
Dictyota dichotoma	prot_D-dichotoma_M_contig59.16758.1	0.331219	0.414662	0.796656	2.4174	2.02739	0.761916	1.06252	unbiased
Dictyota dichotoma	prot_D-dichotoma_M_contig60.16878.1	0.542128	0.727337	0.812696	0.514535	0.36879	0.294054	0.279572	not_expressed
Dictyota dichotoma	prot_D-dichotoma_M_contig174.4980.1	0.133135	0.131844	0.724573	27.9397	26.8486	2.9639	4.81371	unbiased
Dictyota dichotoma	prot_D-dichotoma_M_contig174.4983.1	10.8934	2.22033	0.000244719	35.8467	0.0203853	69.5056	0.0455829	GA_specific
Dictyota dichotoma	prot_D-dichotoma_M_contig175.5029.1	0.389414	0.261135	0.545424	3.59213	2.86115	1.27717	0.56287	unbiased
Dictyota dichotoma	prot_D-dichotoma_M_contig175.5030.1	0.527003	0.297697	0.437932	2.95902	2.14948	1.14138	0.315688	unbiased
Dictyota dichotoma	prot_D-dichotoma_M_contig175.5039.1	-0.442842	0.274381	0.502247	12.2649	17.5333	3.80267	5.8398	unbiased
Dictyota dichotoma	prot_D-dichotoma_M_contig439.14051.1	0.54383	3.25792		0.0393527	0.0313157	0.0849906	0.0700241	not_expressed
Dictyota dichotoma	prot_D-dichotoma_M_contig440.14085.1	2.10404	3.00739		0.112736	0	0.166988	0	not_expressed
Dictyota dichotoma	prot_D-dichotoma_M_contig441.14100.1	0.891592	0.508464	0.445395	2.13004	1.24908	1.07962	0.565064	unbiased
Dictyota dichotoma	prot_D-dichotoma_M_contig441.14105.1	0.157263	0.365791	0.90854	8.88285	8.83991	2.232	6.94128	unbiased
Dictyota dichotoma	prot_D-dichotoma_M_contig52.15647.1	-0.24749	0.264311	0.749697	212.553	268.13	56.119	108.288	unbiased
Dictyota dichotoma	prot_D-dichotoma_M_contig52.15663.1	-2.09468	0.569638	0.0162624	1.00318	4.46259	0.726994	1.66193	SP_biased
Dictyota dichotoma	prot_D-dichotoma_M_contig52.15664.1	-1.67236	0.603337	0.120622	1.23627	4.08986	0.837021	2.65601	unbiased
Dictyota dichotoma	prot_D-dichotoma_M_contig52.15670.1	4.95457	1.48384	0.0392748	8.83737	0.292903	15.1756	0.184387	GA_specific
Dictyota dichotoma	prot_D-dichotoma_M_contig53.15814.1	-0.0693502	0.231473	0.943108	63.9158	69.5575	11.2007	20.9772	unbiased
Dictyota dichotoma	prot_D-dichotoma_M_contig50.15305.1	0.128546	0.678218	0.968855	7.71428	7.13095	8.41698	1.94489	unbiased
Dictyota dichotoma	prot_D-dichotoma_M_contig50.15306.1	-0.385323	0.291204	0.608401	30.8855	42.2136	11.9085	10.7783	unbiased
Dictyota dichotoma	prot_D-dichotoma_M_contig51.15478.1	0.212787	0.425834	0.890288	9.8867	8.63506	5.32236	2.78968	unbiased
Dictyota dichotoma	prot_D-dichotoma_M_contig51.15479.1	-0.398751	0.640152	0.851127	9.78205	12.978	7.49191	7.01471	unbiased
Dictyota dichotoma	prot_D-dichotoma_M_contig51.15480.1	-0.5164	0.500988	0.716121	18.3909	26.363	12.98	4.35657	unbiased
Dictyota dichotoma	prot_D-dichotoma_M_contig51.15486.1	1.74555	0.818715	0.301935	4.45493	1.40629	4.82696	1.1606	unbiased
Dictyota dichotoma	prot_D-dichotoma_M_contig51.15487.1	1.35041	0.963371	0.581767	4.73344	1.92815	5.3855	2.08054	unbiased
Dictyota dichotoma	prot_D-dichotoma_M_contig1501.3606.1	0.220572	0.755308	0.945555	1.80591	1.5722	1.4377	1.24196	unbiased
Dictyota dichotoma	prot_D-dichotoma_M_contig1502.3609.1	0.460743	1.1378	0.916228	0.931694	0.3094	1.76957	0.277135	not_expressed
Dictyota dichotoma	prot_D-dichotoma_M_contig1502.3610.1	-0.677095	1.2712	0.880746	0.251182	0.384498	0.210235	0.563481	not_expressed
Dictyota dichotoma	prot_D-dichotoma_M_contig1503.3620.1				0	0	0	0	not_expressed
Dictyota dichotoma	prot_D-dichotoma_M_contig1503.3621.1	0.547239	3.25791		0.0545028	0.0341585	0.0904344	0.0763806	not_expressed
Dictyota dichotoma	prot_D-dichotoma_M_contig1506.3627.1	-0.316232	3.25801		0.0376451	0.0833945	0.0800384	0.186476	not_expressed
Dictyota dichotoma	prot_D-dichotoma_M_contig1507.3629.1	-0.152828	0.26996	0.871077	6.49678	7.7773	1.95248	2.62922	unbiased
Dictyota dichotoma	prot_D-dichotoma_M_contig1515.3669.1	0.140647	0.512307	0.948215	1.38802	1.32161	0.666546	0.848188	unbiased
Dictyota dichotoma	prot_D-dichotoma_M_contig2324.7873.1	0.107931	0.868157	0.980918	1.56413	1.51695	1.43302	1.30748	unbiased
Dictyota dichotoma	prot_D-dichotoma_M_contig2325.7877.1	0.488427	0.481587	0.722159	2.40544	1.80238	1.75479	0.683489	unbiased
Dictyota dichotoma	prot_D-dichotoma_M_contig2326.7880.1	2.38574	2.26576	0.708819	0.95895	0.184995	1.89284	0.341457	not_expressed
Dictyota dichotoma	prot_D-dichotoma_M_contig2327.7882.1	1.0593	0.857465	0.642545	0.827918	0.450187	0.588266	0.54131	not_expressed
Dictyota dichotoma	prot_D-dichotoma_M_contig2329.7889.1	-0.630929	0.387216	0.495279	2.30195	3.88837	0.964826	2.51851	unbiased
Dictyota dichotoma	prot_D-dichotoma_M_contig2330.7906.1	1.03405	1.96333	0.882623	0.311755	0.141089	0.482905	0.315485	not_expressed
Dictyota dichotoma	prot_D-dichotoma_M_contig2330.7908.1	0.17563	1.09851	0.974358	0.353236	0.321379	0.388821	0.230294	not_expressed
Dictyota dichotoma	prot_D-dichotoma_M_contig2330.7909.1	-1.24672	0.559643	0.267376	0.701139	1.77249	0.522342	1.36992	unbiased
Dictyota dichotoma	prot_D-dichotoma_M_contig2331.7911.1	-0.538929	0.30696	0.444247	40.8331	62.0113	4.96287	38.7737	unbiased
Dictyota dichotoma	prot_D-dichotoma_M_contig481.14902.1	-0.483997	0.567733	0.777539	5.03663	7.69453	4.31654	8.38038	unbiased
Dictyota dichotoma	prot_D-dichotoma_M_contig481.14904.1	5.29346	1.66081	0.0544275	0.638965	0.0160937	1.16613	0.0359865	not_expressed
Dictyota dichotoma	prot_D-dichotoma_M_contig481.14916.1	-0.775523	0.603976	0.624357	0.971536	1.68041	0.819362	1.20564	unbiased
Dictyota dichotoma	prot_D-dichotoma_M_contig483.14948.1	0.466448	0.523732	0.765144	6.23413	4.56951	5.33483	2.53999	unbiased
Dictyota dichotoma	prot_D-dichotoma_M_contig483.14951.1	0.496803	0.746414	0.838738	11.9245	3.5013	22.8537	2.72588	unbiased
Dictyota dichotoma	prot_D-dichotoma_M_contig484.14963.1	-0.186283	0.490297	0.922206	1.34335	1.61648	0.882839	0.508561	unbiased
Dictyota dichotoma	prot_D-dichotoma_M_contig484.14971.1	0.082342	0.204898	0.917219	91.431	91.3037	18.0062	26.0219	unbiased
Dictyota dichotoma	prot_D-dichotoma_M_contig1268.2069.1	0.0584514	0.205021	0.946587	14.7597	15.1022	3.2279	2.36173	unbiased
Dictyota dichotoma	prot_D-dichotoma_M_contig1270.2093.1	-2.19691	0.630732	0.0280239	1.65561	8.12288	1.60236	4.11965	SP_biased
Dictyota dichotoma	prot_D-dichotoma_M_contig1271.2100.1	0.235006	0.352617	0.838738	37.4451	34.3416	15.533	13.6252	unbiased
Dictyota dichotoma	prot_D-dichotoma_M_contig1782.5183.1	-0.637037	0.321545	0.359176	4.50188	7.42781	1.82643	3.35671	unbiased
Dictyota dichotoma	prot_D-dichotoma_M_contig1782.5184.1	-0.012762	0.112111	0.983013	7.89167	8.39143	1.3677	1.23903	unbiased
Dictyota dichotoma	prot_D-dichotoma_M_contig1783.5186.1	-0.341418	0.89607	0.922206	0.567528	0.812242	0.633871	0.731229	not_expressed
Dictyota dichotoma	prot_D-dichotoma_M_contig1784.5189.1	-1.09418	0.493427	0.271565	4.1007	9.44495	2.49337	6.20279	unbiased
Dictyota dichotoma	prot_D-dichotoma_M_contig1785.5191.1	-0.363621	0.400944	0.759786	4.18331	5.63593	2.2871	3.00315	unbiased
Dictyota dichotoma	prot_D-dichotoma_M_contig1165.1358.1	-0.499714	0.282958	0.440778	5.0184	7.3691	1.81676	2.08939	unbiased
Dictyota dichotoma	prot_D-dichotoma_M_contig1167.1366.1	-0.36965	0.229515	0.503363	101.422	136.535	31.3647	26.7535	unbiased
Dictyota dichotoma	prot_D-dichotoma_M_contig1167.1367.1	-0.723353	0.307935	0.224517	57.161	98.497	22.111	38.6158	unbiased
Dictyota dichotoma	prot_D-dichotoma_M_contig1168.1369.1	0.863447	1.44897	0.858922	0.23551	0.141293	0.302765	0.152217	not_expressed
Dictyota dichotoma	prot_D-dichotoma_M_contig1168.1371.1	-0.455973	0.200632	0.248797	26.9805	38.7128	8.24041	9.11805	unbiased
Dictyota dichotoma	prot_D-dichotoma_M_contig1168.1375.1	-0.0783143	0.695611	0.983013	1.60328	1.78959	1.14436	1.29266	unbiased
Dictyota dichotoma	prot_D-dichotoma_M_contig2935.10152.1	2.43918	1.01365	0.208948	2.77084	0.571563	2.75483	0.65254	unbiased
Dictyota dichotoma	prot_D-dichotoma_M_contig2935.10153.1	3.10194	1.01539	0.0717617	10.9588	1.3203	19.7854	1.21622	unbiased
Dictyota dichotoma	prot_D-dichotoma_M_contig2935.10154.1	3.63817	1.3987	0.156548	2.76237	0.239331	5.40586	0.276862	unbiased
Dictyota dichotoma	prot_D-dichotoma_M_contig2943.10172.1	0.434372	0.279504	0.523084	30.8508	24.0846	8.19173	9.45872	unbiased
Dictyota dichotoma	prot_D-dichotoma_M_contig2943.10173.1	0.346062	0.207685	0.480836	31.6518	25.6246	5.46352	6.88934	unbiased
Dictyota dichotoma	prot_D-dichotoma_M_contig522.15704.1	0.404759	0.518873	0.800504	1.77946	1.44755	1.00341	1.23707	unbiased
Dictyota dichotoma	prot_D-dichotoma_M_contig523.15719.1	0.078677	0.306279	0.952424	6.06139	6.1369	2.40356	2.85524	unbiased
Dictyota dichotoma	prot_D-dichotoma_M_contig523.15720.1	-0.159373	0.29448	0.877903	3.64447	4.27649	1.52229	1.6245	unbiased
Dictyota dichotoma	prot_D-dichotoma_M_contig524.15738.1	-0.291197	0.16253	0.429117	11.6903	14.9169	2.22599	4.01335	unbiased
Dictyota dichotoma	prot_D-dichotoma_M_contig525.15751.1	-0.589962	1.32572	0.905407	0.964161	1.43388	1.79551	2.07527	unbiased
Dictyota dichotoma	prot_D-dichotoma_M_contig256.8800.1	0.0231181	0.35004	0.991026	3.87301	4.06842	1.43445	1.4895	unbiased
Dictyota dichotoma	prot_D-dichotoma_M_contig256.8804.1	-0.192793	0.812107	0.957486	4.00408	4.84092	5.07107	6.01645	unbiased
Dictyota dichotoma	prot_D-dichotoma_M_contig256.8805.1	3.82709	1.03376	0.0150188	6.66811	0.513934	11.5916	0.545603	GA_specific
Dictyota dichotoma	prot_D-dichotoma_M_contig4822.14934.1	-0.020057	1.08769	0.997277	0.546712	0.599085	0.653723	0.645234	not_expressed
Dictyota dichotoma	prot_D-dichotoma_M_contig4827.14941.1	2.11256	0.888967	0.217605	26.8266	6.5864	38.4352	4.89102	unbiased
Dictyota dichotoma	prot_D-dichotoma_M_contig4827.14943.1	3.41147	2.30331	0.549855	12.8499	1.14416	15.2306	2.43233	unbiased
Dictyota dichotoma	prot_D-dichotoma_M_contig4827.14944.1	3.97715	1.81667	0.281207	1.48953	0.115194	2.6195	0.198482	unbiased
Dictyota dichotoma	prot_D-dichotoma_M_contig4827.14945.1	2.39997	1.3215	0.421327	14.3314	2.67375	18.4742	3.98253	unbiased
Dictyota dichotoma	prot_D-dichotoma_M_contig4841.14973.1	0.411161	0.916885	0.904175	0.665346	0.539038	0.449407	0.347834	not_expressed
Dictyota dichotoma	prot_D-dichotoma_M_contig4843.14974.1	0.228876	0.574664	0.917953	145.366	133.251	114.846	141.206	unbiased
Dictyota dichotoma	prot_D-dichotoma_M_contig5040.15392.1	0.0854308	0.856771	0.984727	19.984	19.9375	21.1873	22.3779	unbiased
Dictyota dichotoma	prot_D-dichotoma_M_contig5041.15394.1				0	0	0	0	not_expressed
Dictyota dichotoma	prot_D-dichotoma_M_contig5062.15432.1	-0.946437	0.570429	0.482483	3.47174	6.88933	3.24951	5.01219	unbiased
Dictyota dichotoma	prot_D-dichotoma_M_contig5073.15448.1	-0.265767	0.535898	0.891112	9.74354	11.6586	6.38985	5.88802	unbiased
Dictyota dichotoma	prot_D-dichotoma_M_contig5075.15450.1	-0.106051	0.541482	0.967222	3.27412	3.69684	2.1382	1.5242	unbiased
Dictyota dichotoma	prot_D-dichotoma_M_contig5077.15451.1	0.00190286	0.320815	0.998747	14.4777	14.9259	5.9267	6.01562	unbiased
Dictyota dichotoma	prot_D-dichotoma_M_contig5077.15452.1	-0.0255308	0.40399	0.991314	34.4717	36.6811	20.8901	16.5729	unbiased
Dictyota dichotoma	prot_D-dichotoma_M_contig5077.15453.1	-0.278979	0.713517	0.920161	0.916811	1.15019	0.452497	1.29743	unbiased
Dictyota dichotoma	prot_D-dichotoma_M_contig3588.12078.1	0.383764	0.522913	0.816502	11.5521	9.39569	8.23501	3.71147	unbiased
Dictyota dichotoma	prot_D-dichotoma_M_contig3589.12080.1	0.434131	0.367849	0.66167	36.8325	29.2814	20.2242	10.8911	unbiased
Dictyota dichotoma	prot_D-dichotoma_M_contig3594.12100.1	0.837903	3.25801		0.0145678	0	0.0460676	0	not_expressed
Dictyota dichotoma	prot_D-dichotoma_M_contig3596.12101.1	0.524548	0.890059	0.862509	0.576132	0.410753	0.539745	0.347585	not_expressed
Dictyota dichotoma	prot_D-dichotoma_M_contig3604.12154.1	0.48029	1.01317	0.897479	2.4441	1.86746	2.56509	2.24246	unbiased
Dictyota dichotoma	prot_D-dichotoma_M_contig2058.6588.1	-2.65073	1.05619	0.179417	0.157558	1.04523	0.214612	0.826072	unbiased
Dictyota dichotoma	prot_D-dichotoma_M_contig2058.6591.1	-0.39232	1.05585	0.924414	0.110892	0.158896	0.0735647	0.147983	not_expressed
Dictyota dichotoma	prot_D-dichotoma_M_contig2061.6619.1	1.43799	0.865967	0.481752	0.602911	0.223919	0.920605	0.137641	not_expressed
Dictyota dichotoma	prot_D-dichotoma_M_contig2066.6635.1	0.132766	0.166459	0.796862	42.7463	41.1663	7.84631	6.21367	unbiased
Dictyota dichotoma	prot_D-dichotoma_M_contig1608.4247.1	-0.593724	0.700782	0.779461	1.48832	2.51364	0.936255	3.88215	unbiased
Dictyota dichotoma	prot_D-dichotoma_M_contig1608.4250.1	-5.07873	0.852058	1.7659e-06	0.351931	12.0531	0.538021	5.61092	SP_specific
Dictyota dichotoma	prot_D-dichotoma_M_contig1608.4252.1	-5.13446	1.15718	0.00146597	0.752051	24.106	1.36107	11.9236	SP_specific
Dictyota dichotoma	prot_D-dichotoma_M_contig1609.4257.1	-0.602796	0.312421	0.379479	56.7609	89.5797	17.3219	48.0099	unbiased
Dictyota dichotoma	prot_D-dichotoma_M_contig1610.4275.1	1.52016	1.73589	0.769829	0.839012	0.294093	1.55517	0.475571	not_expressed
Dictyota dichotoma	prot_D-dichotoma_M_contig1611.4277.1	0.704606	0.477249	0.55206	8.81532	5.53757	4.68063	3.34253	unbiased
Dictyota dichotoma	prot_D-dichotoma_M_contig1612.4281.1	-0.51074	0.391733	0.615877	29.7417	42.8612	17.3988	15.6498	unbiased
Dictyota dichotoma	prot_D-dichotoma_M_contig1613.4286.1	1.5082	0.982931	0.529299	0.273854	0.105414	0.408063	0.0836481	not_expressed
Dictyota dichotoma	prot_D-dichotoma_M_contig63.17211.1	0.732342	0.594537	0.643824	9.11914	5.52857	9.09084	3.88766	unbiased
Dictyota dichotoma	prot_D-dichotoma_M_contig63.17213.1	-0.545209	1.1342	0.895618	0.561058	0.795988	0.886632	0.780785	not_expressed
Dictyota dichotoma	prot_D-dichotoma_M_contig63.17220.1	-1.5522	0.777011	0.352321	2.60758	7.72512	1.4805	7.09403	unbiased
Dictyota dichotoma	prot_D-dichotoma_M_contig63.17223.1	-0.760378	3.22444		0.0442852	0.0882534	0.0966415	0.197341	not_expressed
Dictyota dichotoma	prot_D-dichotoma_M_contig927.19996.1	-0.64179	0.635974	0.724744	3.97124	6.44462	4.6073	4.11287	unbiased
Dictyota dichotoma	prot_D-dichotoma_M_contig927.19998.1	-0.00728344	0.552287	0.998157	3.04761	3.14547	2.91476	1.52958	unbiased
Dictyota dichotoma	prot_D-dichotoma_M_contig927.19997.1	0.380193	0.482867	0.798302	6.09158	4.82879	5.13166	2.57183	unbiased
Dictyota dichotoma	prot_D-dichotoma_M_contig927.20002.1	1.19567	0.819822	0.559456	2.1615	0.929931	2.4745	0.374498	unbiased
Dictyota dichotoma	prot_D-dichotoma_M_contig929.20032.1	2.04921	0.814225	0.177995	1.8648	0.453914	2.2583	0.560879	unbiased
Dictyota dichotoma	prot_D-dichotoma_M_contig930.20050.1	-0.578271	0.597638	0.740258	1.43921	2.21333	0.898319	1.71585	unbiased
Dictyota dichotoma	prot_D-dichotoma_M_contig931.20053.1	0.929009	0.702744	0.60922	1.59275	0.839169	1.96689	0.448606	unbiased
Dictyota dichotoma	prot_D-dichotoma_M_contig931.20054.1	-0.689018	0.668283	0.715964	0.638857	1.06052	0.458617	0.57242	unbiased
Dictyota dichotoma	prot_D-dichotoma_M_contig1122.1050.1	-0.168429	0.169925	0.731879	17.9898	21.4572	2.16446	5.57834	unbiased
Dictyota dichotoma	prot_D-dichotoma_M_contig1122.1052.1	-0.391479	0.317913	0.643824	8.99816	12.3576	4.0943	5.58879	unbiased
Dictyota dichotoma	prot_D-dichotoma_M_contig1123.1053.1	-0.658973	2.492		0.122859	0.227301	0.211399	0.387126	not_expressed
Dictyota dichotoma	prot_D-dichotoma_M_contig1125.1062.1	-0.0893751	0.420097	0.96455	5.43914	6.01298	3.38671	1.50966	unbiased
Dictyota dichotoma	prot_D-dichotoma_M_contig1126.1065.1	-0.00100217	0.240169	0.998804	3.17105	3.44045	0.871551	1.74433	unbiased
Dictyota dichotoma	prot_D-dichotoma_M_contig1126.1067.1	-1.61224	3.16872		0.0658519	0.245166	0.208242	0.460666	not_expressed
Dictyota dichotoma	prot_D-dichotoma_M_contig1126.1068.1	-0.982772	0.65898	0.545424	0.478983	0.986558	0.403056	0.360551	not_expressed
Dictyota dichotoma	prot_D-dichotoma_M_contig1127.1070.1	-0.261196	0.323267	0.793431	6.70912	8.78286	1.63781	4.88312	unbiased
Dictyota dichotoma	prot_D-dichotoma_M_contig1127.1073.1	-0.434197	0.178345	0.200478	10.9787	15.5286	2.82553	2.3726	unbiased
Dictyota dichotoma	prot_D-dichotoma_M_contig1127.1074.1	2.56324	0.850271	0.0778317	4.65171	0.821812	4.10869	0.665094	unbiased
Dictyota dichotoma	prot_D-dichotoma_M_contig1127.1075.1	1.36815	1.01287	0.597986	3.55622	1.38305	3.59656	2.0126	unbiased
Dictyota dichotoma	prot_D-dichotoma_M_contig1127.1076.1	1.50923	0.977037	0.526228	5.02335	1.75011	4.91968	2.40571	unbiased
Dictyota dichotoma	prot_D-dichotoma_M_contig3792.12601.1	4.843	2.47846	0.369584	0.292858	0	0.615776	0	not_expressed
Dictyota dichotoma	prot_D-dichotoma_M_contig3796.12602.1	0.127412	0.741902	0.971914	1.47528	1.41963	1.66485	1.19405	unbiased
Dictyota dichotoma	prot_D-dichotoma_M_contig3796.12603.1	-0.129977	0.406617	0.937603	4.92095	5.44751	3.30427	1.65279	unbiased
Dictyota dichotoma	prot_D-dichotoma_M_contig3805.12648.1	1.51102	1.53341	0.733497	0.229637	0.0870223	0.268527	0.129241	not_expressed
Dictyota dichotoma	prot_D-dichotoma_M_contig3808.12651.1	1.55892	0.769464	0.343076	2.17305	0.789192	1.75906	0.581814	unbiased
Dictyota dichotoma	prot_D-dichotoma_M_contig395.12997.1	0.468739	0.600474	0.800504	3.51915	2.57839	1.95308	2.71701	unbiased
Dictyota dichotoma	prot_D-dichotoma_M_contig395.13002.1	-0.604768	3.25801		0.0177677	0.0679027	0.0561863	0.0931207	not_expressed
Dictyota dichotoma	prot_D-dichotoma_M_contig395.13004.1	0.396435	0.28841	0.590576	104.671	84.1045	33.6519	28.5476	unbiased
Dictyota dichotoma	prot_D-dichotoma_M_contig395.13005.1	0.0532147	0.642412	0.988999	6.80375	6.74799	5.33498	5.48308	unbiased
Dictyota dichotoma	prot_D-dichotoma_M_contig395.13007.1	1.23175	0.659761	0.40218	2.16291	0.993186	1.85463	0.711845	unbiased
Dictyota dichotoma	prot_D-dichotoma_M_contig395.13008.1	-0.0397909	1.06115	0.994282	0.479155	0.553195	0.857236	0.253162	not_expressed
Dictyota dichotoma	prot_D-dichotoma_M_contig397.13041.1	-3.04433	0.727958	0.0035392	0.193606	1.81502	0.0996007	1.99023	SP_specific
Dictyota dichotoma	prot_D-dichotoma_M_contig2344.7955.1	-0.474038	0.399963	0.660273	4.05218	5.97616	1.86961	3.44751	unbiased
Dictyota dichotoma	prot_D-dichotoma_M_contig2345.7957.1	-0.644968	0.248533	0.158572	9.19408	15.1165	3.03407	5.31516	unbiased
Dictyota dichotoma	prot_D-dichotoma_M_contig2349.7977.1	-0.018499	0.35153	0.992885	13.2199	14.6753	6.30089	6.76275	unbiased
Dictyota dichotoma	prot_D-dichotoma_M_contig2349.7978.1	-0.0277005	3.25801		0.0182278	0.0300767	0.0576415	0.0672535	not_expressed
Dictyota dichotoma	prot_D-dichotoma_M_contig2351.7991.1	-0.0277005	3.25801		0.0177542	0.0359741	0.0561437	0.0804405	not_expressed
Dictyota dichotoma	prot_D-dichotoma_M_contig2351.7992.1	0.952913	1.36513	0.82745	0.463636	0.263989	0.606409	0.244987	not_expressed
Dictyota dichotoma	prot_D-dichotoma_M_contig2353.7997.1	-0.485002	0.388329	0.637962	4.52915	6.63291	2.27489	2.32483	unbiased
Dictyota dichotoma	prot_D-dichotoma_M_contig2353.7996.1	-0.062019	0.522393	0.981863	5.33739	5.65748	3.1585	4.61337	unbiased
Dictyota dichotoma	prot_D-dichotoma_M_contig510.15498.1	-1.08334	0.681452	0.510479	1.66968	3.84926	1.30632	5.14168	unbiased
Dictyota dichotoma	prot_D-dichotoma_M_contig510.15504.1	0.380251	0.284585	0.604015	164.64	135.69	49.8118	42.351	unbiased
Dictyota dichotoma	prot_D-dichotoma_M_contig365.12265.1	3.54867	1.23147	0.100036	0.438362	0.0282258	0.224164	0.0631148	not_expressed
Dictyota dichotoma	prot_D-dichotoma_M_contig1556.3899.1	2.41902	3.23426		0.16565	0	0.291198	0	not_expressed
Dictyota dichotoma	prot_D-dichotoma_M_contig1556.3900.1	0.276896	0.429797	0.845598	4.47091	3.99142	2.63287	1.46913	unbiased
Dictyota dichotoma	prot_D-dichotoma_M_contig1557.3902.1	0.593005	0.213984	0.120622	17.3708	12.4739	4.12087	4.39657	unbiased
Dictyota dichotoma	prot_D-dichotoma_M_contig1560.3926.1	2.07761	1.2409	0.477619	3.53833	0.947663	5.0443	1.27042	unbiased
Dictyota dichotoma	prot_D-dichotoma_M_contig18.5263.1	-0.0421588	0.467421	0.986326	7.6875	8.00454	6.3167	3.32406	unbiased
Dictyota dichotoma	prot_D-dichotoma_M_contig18.5265.1	-0.0251155	3.25789		0.0532291	0.0638434	0.115415	0.142758	not_expressed
Dictyota dichotoma	prot_D-dichotoma_M_contig18.5266.1	0.549367	3.25801		0.0110347	0	0.0348947	0	not_expressed
Dictyota dichotoma	prot_D-dichotoma_M_contig18.5267.1	-0.0277005	3.25801		0.016169	0.0325027	0.0511309	0.0726782	not_expressed
Dictyota dichotoma	prot_D-dichotoma_M_contig18.5272.1	-0.849998	0.483448	0.443255	3.54499	6.5847	2.0283	3.65884	unbiased
Dictyota dichotoma	prot_D-dichotoma_M_contig18.5279.1	-0.714957	0.238096	0.0796158	17.9836	31.1275	5.58047	13.1749	unbiased
Dictyota dichotoma	prot_D-dichotoma_M_contig18.5287.1	0.0286541	0.340154	0.988712	20.0668	21.3626	8.61309	6.81449	unbiased
Dictyota dichotoma	prot_D-dichotoma_M_contig192.5866.1	0.112193	0.104808	0.703743	21.0162	20.6738	2.02249	3.53388	unbiased
Dictyota dichotoma	prot_D-dichotoma_M_contig990.20538.1				0	0	0	0	not_expressed
Dictyota dichotoma	prot_D-dichotoma_M_contig990.20539.1				0	0	0	0	not_expressed
Dictyota dichotoma	prot_D-dichotoma_M_contig991.20544.1	-0.115301	0.230388	0.890288	12.7344	14.533	3.9461	4.99978	unbiased
Dictyota dichotoma	prot_D-dichotoma_M_contig992.20546.1	0.211326	0.251146	0.78189	65.1675	60.2179	21.2162	18.6993	unbiased
Dictyota dichotoma	prot_D-dichotoma_M_contig994.20557.1	1.02986	1.81924	0.871077	0.257952	0.148968	0.287569	0.333103	not_expressed
Dictyota dichotoma	prot_D-dichotoma_M_contig3745.12507.1	-0.747333	0.516503	0.56456	3.73629	6.55441	2.17189	4.30689	unbiased
Dictyota dichotoma	prot_D-dichotoma_M_contig3746.12508.1	1.12902	3.25789		0.0311688	0	0.0502642	0	not_expressed
Dictyota dichotoma	prot_D-dichotoma_M_contig3749.12510.1	-0.029829	3.25791		0.0426611	0.0550036	0.0705852	0.122992	not_expressed
Dictyota dichotoma	prot_D-dichotoma_M_contig3757.12531.1	-0.265323	1.07883	0.955194	0.515972	0.640422	0.643173	0.436534	not_expressed
Dictyota dichotoma	prot_D-dichotoma_M_contig3757.12533.1	-0.684556	0.713351	0.742464	11.5758	18.6477	14.2822	6.26039	unbiased
Dictyota dichotoma	prot_D-dichotoma_M_contig3758.12535.1	2.32457	3.23642		0.0980126	0	0.208689	0	not_expressed
Dictyota dichotoma	prot_D-dichotoma_M_contig3761.12544.1	-0.174092	0.42229	0.914008	1.9333	2.27304	1.21405	1.02367	unbiased
Dictyota dichotoma	prot_D-dichotoma_M_contig3761.12545.1	0.272344	0.375688	0.819629	15.2112	12.842	8.75872	4.435	unbiased
Dictyota dichotoma	prot_D-dichotoma_M_contig1869.5604.1	-0.802816	0.490531	0.492092	4.17939	7.61439	2.41119	5.34337	unbiased
Dictyota dichotoma	prot_D-dichotoma_M_contig1869.5605.1	-0.108928	0.155702	0.82745	8.83849	10.1321	1.95466	3.12271	unbiased
Dictyota dichotoma	prot_D-dichotoma_M_contig1869.5607.1	4.26516	1.33005	0.0527126	1.07129	0.02178	2.1289	0.0305555	unbiased
Dictyota dichotoma	prot_D-dichotoma_M_contig1872.5625.1	0.328237	0.388802	0.780541	8.54855	7.30405	4.17275	3.48878	unbiased
Dictyota dichotoma	prot_D-dichotoma_M_contig1874.5629.1	0.575485	0.63675	0.760614	2.66467	1.83556	2.75242	0.867368	unbiased
Dictyota dichotoma	prot_D-dichotoma_M_contig1875.5630.1	1.45886	3.25601		0.0783158	0	0.166771	0	not_expressed
Dictyota dichotoma	prot_D-dichotoma_M_contig2739.9453.1	0.115818	0.501397	0.959835	8.45909	8.49625	4.69812	5.23446	unbiased
Dictyota dichotoma	prot_D-dichotoma_M_contig2740.9461.1	6.14724	1.48937	0.00414662	0.580509	0	0.644385	0	not_expressed
Dictyota dichotoma	prot_D-dichotoma_M_contig453.14354.1	-0.0213107	0.221572	0.985323	38.2326	40.7424	2.23041	15.9925	unbiased
Dictyota dichotoma	prot_D-dichotoma_M_contig454.14385.1	0.112828	0.630955	0.970531	2.62426	2.48803	1.08345	1.91686	unbiased
Dictyota dichotoma	prot_D-dichotoma_M_contig454.14392.1	-0.316236	3.25801		0	0.034671	0	0.0775266	not_expressed
Dictyota dichotoma	prot_D-dichotoma_M_contig26.8962.1	-0.870167	3.19738		0.0539763	0.108168	0.124546	0.241872	not_expressed
Dictyota dichotoma	prot_D-dichotoma_M_contig27.9298.1	-0.597771	0.433505	0.589545	0.678657	1.0675	0.351496	0.560551	unbiased
Dictyota dichotoma	prot_D-dichotoma_M_contig27.9299.1	-1.09949	0.64053	0.458709	0.550326	1.23181	0.425456	0.687358	unbiased
Dictyota dichotoma	prot_D-dichotoma_M_contig27.9300.1	-0.810446	0.507004	0.5089	0.862957	1.60707	0.534297	0.794629	unbiased
Dictyota dichotoma	prot_D-dichotoma_M_contig27.9302.1	-3.27302	0.681563	0.000381155	1.95124	20.5687	1.60239	28.2789	SP_biased
Dictyota dichotoma	prot_D-dichotoma_M_contig27.9310.1	0.725497	0.311789	0.232672	3.59097	2.33589	1.05797	1.34367	unbiased
Dictyota dichotoma	prot_D-dichotoma_M_contig27.9316.1	0.0834353	0.28979	0.946006	40.1306	39.2744	19.2457	12.3714	unbiased
Dictyota dichotoma	prot_D-dichotoma_M_contig611.16998.1	0.0952901	0.233658	0.915587	6.31451	6.39251	1.50924	1.76396	unbiased
Dictyota dichotoma	prot_D-dichotoma_M_contig611.17001.1	1.67796	3.2517		0.0896156	0	0.137051	0	not_expressed
Dictyota dichotoma	prot_D-dichotoma_M_contig611.17004.1	-0.50371	0.868691	0.865888	3.69387	4.99582	4.35664	3.86001	unbiased
Dictyota dichotoma	prot_D-dichotoma_M_contig612.17005.1				0	0	0	0	not_expressed
Dictyota dichotoma	prot_D-dichotoma_M_contig614.17028.1	0.9259	0.643009	0.567058	2.37035	1.35626	2.04583	0.947062	unbiased
Dictyota dichotoma	prot_D-dichotoma_M_contig614.17029.1	-0.558754	0.632539	0.767034	2.58195	3.83705	2.04896	2.30796	unbiased
Dictyota dichotoma	prot_D-dichotoma_M_contig382.12675.1	1.97353	1.81889	0.697563	0.34474	0.0965945	0.630627	0.132286	not_expressed
Dictyota dichotoma	prot_D-dichotoma_M_contig383.12701.1	-0.337741	0.33528	0.725831	13.1638	16.8578	5.14319	8.5803	unbiased
Dictyota dichotoma	prot_D-dichotoma_M_contig383.12702.1	-0.0719528	0.236885	0.942061	11.2202	12.5329	3.04553	3.45791	unbiased
Dictyota dichotoma	prot_D-dichotoma_M_contig383.12704.1	-1.73507	0.961585	0.424378	3.21882	11.2828	5.22099	15.7381	unbiased
Dictyota dichotoma	prot_D-dichotoma_M_contig383.12706.1	-1.90038	1.02354	0.405122	2.34476	9.3714	3.30422	10.7992	unbiased
Dictyota dichotoma	prot_D-dichotoma_M_contig383.12707.1	-2.32625	0.999225	0.232245	1.60578	8.51832	2.8232	11.9071	unbiased
Dictyota dichotoma	prot_D-dichotoma_M_contig383.12708.1	-2.76079	2.16797	0.628972	1.06497	7.4077	2.14301	10.6392	unbiased
Dictyota dichotoma	prot_D-dichotoma_M_contig321.11086.1	-0.492581	0.233301	0.310225	20.7803	31.24	5.16408	13.235	unbiased
Dictyota dichotoma	prot_D-dichotoma_M_contig322.11122.1	-0.129099	0.394293	0.935777	7.14465	8.50311	4.08043	6.32073	unbiased
Dictyota dichotoma	prot_D-dichotoma_M_contig322.11126.1	2.4667	0.876693	0.112055	2.39256	0.430133	3.9946	0.160416	unbiased
Dictyota dichotoma	prot_D-dichotoma_M_contig323.11147.1	0.487705	0.396044	0.643824	133.057	94.695	83.1034	39.2544	unbiased
Dictyota dichotoma	prot_D-dichotoma_M_contig115.1225.1	-1.77825	0.887859	0.350418	0.563187	2.11862	0.611939	2.13018	unbiased
Dictyota dichotoma	prot_D-dichotoma_M_contig115.1229.1	0.516635	0.437262	0.661636	1.86572	1.35128	1.19404	0.728304	unbiased
Dictyota dichotoma	prot_D-dichotoma_M_contig115.1239.1	-0.239779	0.221167	0.697795	26.5578	33.5953	4.21888	14.0059	unbiased
Dictyota dichotoma	prot_D-dichotoma_M_contig115.1242.1	-0.342642	0.404012	0.779419	4.40339	5.74139	2.52178	2.20582	unbiased
Dictyota dichotoma	prot_D-dichotoma_M_contig116.1308.1	2.66085	1.14434	0.232833	0.850848	0.149122	0.909898	0.207626	not_expressed
Dictyota dichotoma	prot_D-dichotoma_M_contig116.1311.1	-0.96761	0.346846	0.115929	73.0833	147.095	26.7137	72.7671	unbiased
Dictyota dichotoma	prot_D-dichotoma_M_contig184.5456.1	0.375719	1.48743	0.953728	0.351245	0.289241	0.393795	0.269305	not_expressed
Dictyota dichotoma	prot_D-dichotoma_M_contig184.5460.1	0.414035	0.815633	0.8877	0.874297	0.68179	0.952113	0.639125	not_expressed
Dictyota dichotoma	prot_D-dichotoma_M_contig185.5511.1	0.0843537	0.284695	0.944244	142.046	137.563	29.4791	60.2903	unbiased
Dictyota dichotoma	prot_D-dichotoma_M_contig186.5551.1	0.505437	0.270004	0.400469	13.6064	10.4309	4.30338	2.47346	unbiased
Dictyota dichotoma	prot_D-dichotoma_M_contig186.5553.1	0.281055	1.34183	0.965223	1.98513	1.7475	3.21155	3.15782	unbiased
Dictyota dichotoma	prot_D-dichotoma_M_contig186.5554.1	0.539224	0.963039	0.873247	3.58243	2.72844	4.34034	4.50912	unbiased
Dictyota dichotoma	prot_D-dichotoma_M_contig186.5557.1	-0.302676	0.479282	0.848456	1.58782	2.10431	0.734987	1.38418	unbiased
Dictyota dichotoma	prot_D-dichotoma_M_contig186.5558.1	-0.509767	0.309165	0.486049	1.40099	2.09623	0.454067	0.737717	unbiased
Dictyota dichotoma	prot_D-dichotoma_M_contig172.4892.1	-0.118261	0.29732	0.917953	87.4796	99.2464	34.6448	27.9351	unbiased
Dictyota dichotoma	prot_D-dichotoma_M_contig173.4932.1	0.549367	3.25801		0.0111761	0	0.0353421	0	not_expressed
Dictyota dichotoma	prot_D-dichotoma_M_contig4420.14121.1	1.93501	0.858766	0.257736	0.907414	0.257645	0.827482	0.165946	not_expressed
Dictyota dichotoma	prot_D-dichotoma_M_contig4420.14122.1	4.32855	1.04747	0.00412483	0.836922	0.0446816	0.851484	0.0524117	not_expressed
Dictyota dichotoma	prot_D-dichotoma_M_contig4425.14125.1	0.013187	0.247827	0.992885	74.5508	76.0281	27.8704	16.0124	unbiased
Dictyota dichotoma	prot_D-dichotoma_M_contig4425.14126.1	-0.552222	0.503338	0.692498	1.54439	2.41045	0.92088	1.21893	unbiased
Dictyota dichotoma	prot_D-dichotoma_M_contig4426.14128.1	0.698159	0.571452	0.647506	2.69601	1.7461	2.9082	0.923579	unbiased
Dictyota dichotoma	prot_D-dichotoma_M_contig4446.14165.1	0.837903	3.25801		0.0247368	0	0.0521535	0	not_expressed
Dictyota dichotoma	prot_D-dichotoma_M_contig2402.8222.1	-0.369705	0.354429	0.712429	97.4963	128.731	38.3725	61.0038	unbiased
Dictyota dichotoma	prot_D-dichotoma_M_contig2402.8223.1	-0.672273	0.680737	0.732633	104.867	163.501	84.6253	201.922	unbiased
Dictyota dichotoma	prot_D-dichotoma_M_contig2407.8244.1	0.350529	0.302932	0.671076	15.9645	12.9174	4.27186	7.55133	unbiased
Dictyota dichotoma	prot_D-dichotoma_M_contig2410.8262.1	-0.78822	0.250915	0.0603174	5.62169	10.2084	2.15403	3.31126	unbiased
Dictyota dichotoma	prot_D-dichotoma_M_contig2410.8263.1	1.54816	1.10958	0.584713	0.750487	0.288208	1.1072	0.47024	not_expressed
Dictyota dichotoma	prot_D-dichotoma_M_contig2410.8265.1	-0.391239	0.419636	0.7507	2.24521	3.15803	1.27797	1.63153	unbiased
Dictyota dichotoma	prot_D-dichotoma_M_contig2410.8266.1	-0.0236483	0.479533	0.99329	1.71217	1.91787	1.22651	1.3727	unbiased
Dictyota dichotoma	prot_D-dichotoma_M_contig2078.6751.1	1.04278	0.873629	0.656304	8.77484	4.35339	14.1613	4.04229	unbiased
Dictyota dichotoma	prot_D-dichotoma_M_contig2081.6767.1	-1.7035	0.194089	3.5417e-15	10.102	34.4041	3.30006	5.32064	SP_biased
Dictyota dichotoma	prot_D-dichotoma_M_contig2082.6769.1	-0.278292	0.298676	0.75117	21.3072	27.2608	7.44641	10.7408	unbiased
Dictyota dichotoma	prot_D-dichotoma_M_contig2082.6771.1	-0.0880163	0.228582	0.921963	17.1969	18.8983	6.27322	3.41752	unbiased
Dictyota dichotoma	prot_D-dichotoma_M_contig1185.1486.1	0.471022	0.438752	0.702966	5.54133	4.05728	3.15697	1.72637	unbiased
Dictyota dichotoma	prot_D-dichotoma_M_contig1186.1490.1	-0.805262	1.2662	0.847719	0.244801	0.458741	0.295265	0.433201	not_expressed
Dictyota dichotoma	prot_D-dichotoma_M_contig3918.12942.1	0.980822	0.892604	0.692287	0.531692	0.293459	0.361245	0.209515	not_expressed
Dictyota dichotoma	prot_D-dichotoma_M_contig3918.12943.1	1.37101	0.709407	0.377674	1.5472	0.643995	1.45916	0.407958	unbiased
Dictyota dichotoma	prot_D-dichotoma_M_contig3918.12944.1	0.984044	0.530996	0.406304	6.57312	3.61894	4.43728	2.13936	unbiased
Dictyota dichotoma	prot_D-dichotoma_M_contig3928.12951.1	-0.738397	1.0058	0.816467	1.7039	2.82343	2.26463	1.43539	unbiased
Dictyota dichotoma	prot_D-dichotoma_M_contig3929.12954.1	0.123903	0.3226	0.922024	8.45346	8.07953	3.17164	2.74825	unbiased
Dictyota dichotoma	prot_D-dichotoma_M_contig3930.12967.1	0.297947	0.928557	0.937603	0.267021	0.237008	0.195724	0.226629	not_expressed
Dictyota dichotoma	prot_D-dichotoma_M_contig3933.12971.1	-2.46492	2.67974		0.0325496	0.258477	0.0712348	0.35514	not_expressed
Dictyota dichotoma	prot_D-dichotoma_M_contig3933.12972.1	-0.25041	0.428752	0.864364	3.69033	4.62479	2.14237	2.42773	unbiased
Dictyota dichotoma	prot_D-dichotoma_M_contig3934.12974.1	-0.270983	0.320131	0.779461	4.28777	5.50531	1.44699	2.7306	unbiased
Dictyota dichotoma	prot_D-dichotoma_M_contig3272.11253.1	-0.610599	1.55819	0.919989	0.078793	0.128624	0.0990381	0.192685	not_expressed
Dictyota dichotoma	prot_D-dichotoma_M_contig3273.11254.1	-0.559854	0.333027	0.473982	45.4953	73.6887	17.5418	33.9128	unbiased
Dictyota dichotoma	prot_D-dichotoma_M_contig3276.11263.1				0	0	0	0	not_expressed
Dictyota dichotoma	prot_D-dichotoma_M_contig3276.11264.1	1.77528	1.09315	0.498155	0.795528	0.263361	0.882407	0.267256	not_expressed
Dictyota dichotoma	prot_D-dichotoma_M_contig3283.11293.1	-0.492298	0.370085	0.607398	155.992	237.484	61.2461	106.194	unbiased
Dictyota dichotoma	prot_D-dichotoma_M_contig85.19286.1	-1.59663	0.629728	0.173601	0.894418	2.89402	0.481507	1.78177	unbiased
Dictyota dichotoma	prot_D-dichotoma_M_contig85.19292.1	0.106689	0.292558	0.926163	32.154	30.9181	16.31	9.78053	unbiased
Dictyota dichotoma	prot_D-dichotoma_M_contig85.19295.1	-0.189758	0.297949	0.847497	75.4788	87.2042	18.289	47.0169	unbiased
Dictyota dichotoma	prot_D-dichotoma_M_contig85.19296.1	0.224834	0.260326	0.774462	5.2044	4.62617	1.97377	1.68402	unbiased
Dictyota dichotoma	prot_D-dichotoma_M_contig86.19364.1	-0.147973	0.500899	0.944465	5.39714	6.25439	3.20771	3.8392	unbiased
Dictyota dichotoma	prot_D-dichotoma_M_contig86.19366.1	-0.675344	0.485392	0.585084	3.37326	5.48377	1.70924	3.91165	unbiased
Dictyota dichotoma	prot_D-dichotoma_M_contig4791.14857.1	4.16111	1.30027	0.0538161	1.19129	0.0734619	2.14046	0.0851528	unbiased
Dictyota dichotoma	prot_D-dichotoma_M_contig4802.14895.1	0.549367	3.25801		0.00689928	0	0.0218174	0	not_expressed
Dictyota dichotoma	prot_D-dichotoma_M_contig4803.14896.1	-0.387753	2.09688		0.0843242	0.114584	0.132585	0.163576	not_expressed
Dictyota dichotoma	prot_D-dichotoma_M_contig4819.14925.1	-0.289034	0.435409	0.838814	53.1663	70.9	32.3474	32.1722	unbiased
Dictyota dichotoma	prot_D-dichotoma_M_contig401.13190.1	0.78568	0.380983	0.330152	2.86608	1.75624	1.19555	0.970201	unbiased
Dictyota dichotoma	prot_D-dichotoma_M_contig401.13193.1	-0.567286	0.530925	0.704138	6.62451	10.063	4.50191	1.57965	unbiased
Dictyota dichotoma	prot_D-dichotoma_M_contig401.13195.1	-0.715306	0.486754	0.555077	7.13834	11.9834	5.09727	6.37624	unbiased
Dictyota dichotoma	prot_D-dichotoma_M_contig401.13196.1	-0.521649	0.343723	0.536622	8.08215	11.934	4.45119	4.70087	unbiased
Dictyota dichotoma	prot_D-dichotoma_M_contig402.13213.1	-0.168907	0.167913	0.726247	16.1671	19.7721	2.03836	6.95564	unbiased
Dictyota dichotoma	prot_D-dichotoma_M_contig403.13233.1	-0.281489	2.12841		0.127136	0.179198	0.240542	0.214744	not_expressed
Dictyota dichotoma	prot_D-dichotoma_M_contig404.13259.1	0.266717	0.319151	0.78417	32.396	28.476	11.7156	11.2165	unbiased
Dictyota dichotoma	prot_D-dichotoma_M_contig404.13265.1	-1.05437	0.634026	0.481296	1.37512	3.11841	0.986922	2.63677	unbiased
Dictyota dichotoma	prot_D-dichotoma_M_contig1843.5480.1	1.564	1.09602	0.571843	1.55334	0.555811	1.88668	0.762335	unbiased
Dictyota dichotoma	prot_D-dichotoma_M_contig1844.5486.1	0.413749	0.406746	0.721319	11.5585	8.93175	6.63774	2.79698	unbiased
Dictyota dichotoma	prot_D-dichotoma_M_contig1845.5488.1	-0.383713	1.62768	0.958112	0.0524851	0.0730966	0.0512763	0.100093	not_expressed
Dictyota dichotoma	prot_D-dichotoma_M_contig1846.5492.1	2.74529	1.64972	0.481068	0.207981	0.0229182	0.232476	0.0512465	not_expressed
Dictyota dichotoma	prot_D-dichotoma_M_contig1847.5494.1	1.3463	0.567635	0.21896	2.81623	1.16081	2.79505	0.64145	unbiased
Dictyota dichotoma	prot_D-dichotoma_M_contig1848.5498.1	0.0316085	0.412899	0.989738	26.95	28.2891	18.3213	11.5196	unbiased
Dictyota dichotoma	prot_D-dichotoma_M_contig3010.10454.1	-0.296327	0.581988	0.887528	2.16093	2.64006	1.83983	1.79966	unbiased
Dictyota dichotoma	prot_D-dichotoma_M_contig3013.10458.1	1.70339	0.959822	0.436234	0.898347	0.306395	1.21513	0.338865	not_expressed
Dictyota dichotoma	prot_D-dichotoma_M_contig3015.10464.1	4.06112	1.21405	0.0388253	1.87809	0.111164	2.26003	0.117588	GA_specific
Dictyota dichotoma	prot_D-dichotoma_M_contig3016.10469.1	1.27809	0.797198	0.506648	74.2971	33.5652	82.9237	30.4567	unbiased
Dictyota dichotoma	prot_D-dichotoma_M_contig3016.10471.1	-0.363656	0.702347	0.885974	1.5343	2.1602	1.06053	1.89982	unbiased
Dictyota dichotoma	prot_D-dichotoma_M_contig3018.10476.1	0.439256	0.706794	0.851364	0.77734	0.591012	0.632822	0.164283	not_expressed
Dictyota dichotoma	prot_D-dichotoma_M_contig3023.10495.1	0.830842	0.590508	0.579843	18.4961	10.5398	15.4227	6.4529	unbiased
Dictyota dichotoma	prot_D-dichotoma_M_contig3024.10501.1	-1.4708	3.20043		0.0311336	0.138684	0.098453	0.310107	not_expressed
Dictyota dichotoma	prot_D-dichotoma_M_contig514.15565.1	-0.207634	0.289485	0.821558	5.30052	6.47557	1.71556	3.08962	unbiased
Dictyota dichotoma	prot_D-dichotoma_M_contig515.15576.1	3.32207	1.45384	0.245626	0.892815	0.0876375	1.64714	0.156491	not_expressed
Dictyota dichotoma	prot_D-dichotoma_M_contig515.15578.1	1.49867	1.15055	0.6167	2.09896	0.269971	4.37419	0.298108	unbiased
Dictyota dichotoma	prot_D-dichotoma_M_contig516.15591.1	-1.17985	1.29659	0.758899	0.135815	0.331368	0.138435	0.454722	not_expressed
Dictyota dichotoma	prot_D-dichotoma_M_contig5503.16175.1	-0.125402	0.264151	0.897474	42.7654	49.6131	10.2467	14.1872	unbiased
Dictyota dichotoma	prot_D-dichotoma_M_contig5515.16187.1	-0.0796815	0.37375	0.96455	39.3593	42.55	20.8003	17.2055	unbiased
Dictyota dichotoma	prot_D-dichotoma_M_contig5523.16197.1	0.438967	2.53085		0.119479	0.094085	0.160441	0.210381	not_expressed
Dictyota dichotoma	prot_D-dichotoma_M_contig5528.16201.1	1.7546	1.32338	0.607517	0.229809	0.072258	0.20613	0.0660616	not_expressed
Dictyota dichotoma	prot_D-dichotoma_M_contig5535.16215.1	-0.179304	1.01257	0.971007	2.3192	2.80669	3.78616	3.46428	unbiased
Dictyota dichotoma	prot_D-dichotoma_M_contig5536.16218.1	1.5509	2.21329		0.0557132	0.0141874	0.0658759	0.031724	not_expressed
Dictyota dichotoma	prot_D-dichotoma_M_contig5541.16230.1				0	0	0	0	not_expressed
Dictyota dichotoma	prot_D-dichotoma_M_contig1538.3797.1	0.195115	0.519315	0.923264	30.3864	27.4161	20.0981	12.389	unbiased
Dictyota dichotoma	prot_D-dichotoma_M_contig1539.3804.1	1.13615	2.29113	0.891112	0.25017	0.120183	0.49947	0.233978	not_expressed
Dictyota dichotoma	prot_D-dichotoma_M_contig1539.3808.1	-0.114928	1.60698	0.990321	0.350072	0.417028	0.550817	0.587797	not_expressed
Dictyota dichotoma	prot_D-dichotoma_M_contig1539.3810.1	0.580648	0.384777	0.539411	8.54887	5.93253	4.45106	2.38209	unbiased
Dictyota dichotoma	prot_D-dichotoma_M_contig1541.3826.1	-0.638639	0.554927	0.674907	1.05704	1.75155	0.785559	0.732891	unbiased
Dictyota dichotoma	prot_D-dichotoma_M_contig287.9898.1	-0.585268	0.295245	0.358498	27.4925	42.6572	8.8174	21.0457	unbiased
Dictyota dichotoma	prot_D-dichotoma_M_contig287.9906.1	-0.654746	0.445734	0.5553	22.4341	36.4552	12.3516	21.6655	unbiased
Dictyota dichotoma	prot_D-dichotoma_M_contig287.9908.1	0.496162	0.257455	0.380003	6.08968	4.52352	2.79218	1.50232	unbiased
Dictyota dichotoma	prot_D-dichotoma_M_contig288.9934.1	0.237476	0.419051	0.871077	7.36825	6.40598	3.9413	2.44885	unbiased
Dictyota dichotoma	prot_D-dichotoma_M_contig288.9939.1	-0.206216	0.18103	0.679546	19.7297	24.0822	5.01545	7.48062	unbiased
Dictyota dichotoma	prot_D-dichotoma_M_contig289.9964.1	2.1122	1.68186	0.63706	1.00975	0.0822348	2.19942	0.147879	unbiased
Dictyota dichotoma	prot_D-dichotoma_M_contig289.9965.1	4.64859	1.70557	0.129253	0.802739	0.010495	1.58114	0.0234675	not_expressed
Dictyota dichotoma	prot_D-dichotoma_M_contig289.9966.1	0.912252	0.826068	0.690762	1.02454	0.568802	0.871195	0.479959	unbiased
Dictyota dichotoma	prot_D-dichotoma_M_contig289.9967.1	0.769597	1.56109	0.891908	0.3676	0.225784	0.866527	0.245124	not_expressed
Dictyota dichotoma	prot_D-dichotoma_M_contig289.9969.1	0.903899	0.755556	0.655307	1.29882	0.719304	1.57463	0.289731	unbiased
Dictyota dichotoma	prot_D-dichotoma_M_contig289.9971.1	-0.325798	0.234328	0.585084	26.8289	35.4712	9.36588	11.3339	unbiased
Dictyota dichotoma	prot_D-dichotoma_M_contig289.9974.1	0.116462	0.596102	0.967374	1.42728	1.38333	1.01557	0.679393	unbiased
Dictyota dichotoma	prot_D-dichotoma_M_contig289.9978.1	-0.45464	0.122609	0.0147808	8.93716	12.9952	1.23277	2.9743	unbiased
Dictyota dichotoma	prot_D-dichotoma_M_contig5433.16067.1	-4.73695	2.64814		0.0379746	1.21343	0.0831073	2.71332
Dictyota dichotoma	prot_D-dichotoma_M_contig5446.16079.1	1.43583	3.25619		0.0575631	0	0.140392	0	not_expressed
Dictyota dichotoma	prot_D-dichotoma_M_contig5446.16080.1	0.512022	0.90215	0.870987	0.389828	0.29735	0.225186	0.330196	not_expressed
Dictyota dichotoma	prot_D-dichotoma_M_contig5457.16085.1	0.3257	0.888439	0.925522	1.39815	1.09838	1.92819	0.381379	unbiased
Dictyota dichotoma	prot_D-dichotoma_M_contig5462.16098.1	-0.0251155	3.25789		0.0361714	0.0467849	0.0591247	0.104614	not_expressed
Dictyota dichotoma	prot_D-dichotoma_M_contig5475.16117.1	-0.76496	0.875418	0.770687	7.54202	13.297	9.61299	8.19223	unbiased
Dictyota dichotoma	prot_D-dichotoma_M_contig5477.16118.1	-0.738114	0.413939	0.43233	27.3895	48.2212	14.5464	24.2935	unbiased
Dictyota dichotoma	prot_D-dichotoma_M_contig5481.16141.1	-2.37335	0.555948	0.00273806	15.2426	82.4229	12.9124	59.9152	SP_biased
Dictyota dichotoma	prot_D-dichotoma_M_contig591.16777.1	0.837903	3.25801		0.0259609	0	0.0561697	0	not_expressed
Dictyota dichotoma	prot_D-dichotoma_M_contig592.16782.1	0.454643	0.561837	0.792834	30.671	24.9616	17.2153	15.019	unbiased
Dictyota dichotoma	prot_D-dichotoma_M_contig592.16789.1	-0.145963	0.361377	0.916814	2.523	2.855	1.32221	1.45981	unbiased
Dictyota dichotoma	prot_D-dichotoma_M_contig28.9655.1	-0.23763	0.490898	0.894489	11.1067	12.9655	7.36749	8.10072	unbiased
Dictyota dichotoma	prot_D-dichotoma_M_contig28.9667.1	-0.37865	0.288474	0.611888	38.0922	53.7034	12.4662	19.8359	unbiased
Dictyota dichotoma	prot_D-dichotoma_M_contig28.9677.1	0.451073	0.863262	0.884449	4.89412	3.9823	4.31849	5.75158	unbiased
Dictyota dichotoma	prot_D-dichotoma_M_contig28.9679.1	1.77384	2.50707		0.155682	0.0380701	0.234142	0.0851273	not_expressed
Dictyota dichotoma	prot_D-dichotoma_M_contig309.10687.1	0.740492	0.586318	0.633853	0.391316	0.251778	0.239112	0.0611619	not_expressed
Dictyota dichotoma	prot_D-dichotoma_M_contig309.10689.1	-0.381699	0.537676	0.82525	4.14661	5.3104	2.8919	3.68392	unbiased
Dictyota dichotoma	prot_D-dichotoma_M_contig309.10690.1	-0.587261	0.576044	0.720415	3.78541	5.63649	2.9364	3.81882	unbiased
Dictyota dichotoma	prot_D-dichotoma_M_contig309.10691.1	-0.285661	0.443936	0.845766	4.34204	5.42258	2.42766	1.96609	unbiased
Dictyota dichotoma	prot_D-dichotoma_M_contig309.10694.1	-0.213382	1.12922	0.969129	0.285577	0.348382	0.327185	0.367505	not_expressed
Dictyota dichotoma	prot_D-dichotoma_M_contig310.10728.1	0.549367	3.25801		0.0155668	0	0.0492265	0	not_expressed
Dictyota dichotoma	prot_D-dichotoma_M_contig310.10729.1	0.253438	0.239547	0.706715	49.1701	44.0669	11.2676	7.91842	unbiased
Dictyota dichotoma	prot_D-dichotoma_M_contig310.10740.1	0.526679	0.343049	0.528798	7.42108	5.63169	3.91513	1.74374	unbiased
Dictyota dichotoma	prot_D-dichotoma_M_contig310.10741.1	-0.0722005	0.375311	0.968073	5.25459	6.04337	2.72911	3.31271	unbiased
Dictyota dichotoma	prot_D-dichotoma_M_contig310.10745.1	0.35118	0.329402	0.704931	6.21238	5.26743	1.8901	3.00185	unbiased
Dictyota dichotoma	prot_D-dichotoma_M_contig580.16647.1	0.35194	0.211856	0.481463	11.7277	9.82764	3.05151	3.61562	unbiased
Dictyota dichotoma	prot_D-dichotoma_M_contig582.16663.1	0.0411556	0.584682	0.990467	11.8912	12.1595	7.98832	9.67501	unbiased
Dictyota dichotoma	prot_D-dichotoma_M_contig582.16665.1	1.42155	1.07385	0.608372	5.05606	0.972819	9.22056	0.901275	unbiased
Dictyota dichotoma	prot_D-dichotoma_M_contig1280.2144.1	-0.395565	0.254787	0.523097	18.418	25.5372	7.03261	7.24833	unbiased
Dictyota dichotoma	prot_D-dichotoma_M_contig1282.2159.1	-0.208198	0.516749	0.917033	8.31746	9.96434	5.58295	5.63187	unbiased
Dictyota dichotoma	prot_D-dichotoma_M_contig1283.2166.1	-2.14818	1.58609	0.596146	2.14899	9.87471	3.85003	15.8107	unbiased
Dictyota dichotoma	prot_D-dichotoma_M_contig1285.2176.1	2.06132	0.902916	0.245626	3.05888	0.738446	2.77191	0.506228	unbiased
Dictyota dichotoma	prot_D-dichotoma_M_contig1285.2177.1	2.47414	1.02424	0.206278	2.56632	0.522422	2.6124	0.754772	unbiased
Dictyota dichotoma	prot_D-dichotoma_M_contig1285.2179.1	0.311987	0.554861	0.872761	5.20174	4.76677	4.17517	2.92036	unbiased
Dictyota dichotoma	prot_D-dichotoma_M_contig1286.2183.1	-0.365419	0.877898	0.912368	0.449429	0.610875	0.320547	0.472481	not_expressed
Dictyota dichotoma	prot_D-dichotoma_M_contig1286.2187.1	-1.74671	1.02038	0.461331	0.115456	0.406105	0.131084	0.362894	not_expressed
Dictyota dichotoma	prot_D-dichotoma_M_contig596.16813.1	-2.55286	0.558076	0.000888096	0.468171	2.86243	0.419795	1.89185	SP_specific
Dictyota dichotoma	prot_D-dichotoma_M_contig596.16814.1	2.17991	2.34658	0.752119	0.130853	0.0298704	0.235697	0.0667922	not_expressed
Dictyota dichotoma	prot_D-dichotoma_M_contig1054.509.1	0.858765	3.25619		0.0631868	0.0294178	0.117484	0.0657802	not_expressed
Dictyota dichotoma	prot_D-dichotoma_M_contig1055.519.1	0.286954	0.236629	0.650151	10.7246	9.52909	3.0673	2.24192	unbiased
Dictyota dichotoma	prot_D-dichotoma_M_contig1056.523.1	-0.0119851	0.342539	0.994854	40.325	44.3712	14.8882	24.3761	unbiased
Dictyota dichotoma	prot_D-dichotoma_M_contig1056.524.1	-0.396111	0.253696	0.520415	44.1062	60.7423	12.6266	23.6334	unbiased
Dictyota dichotoma	prot_D-dichotoma_M_contig1059.537.1	1.69558	1.80489	0.748704	0.358656	0.107865	0.50588	0.241194	not_expressed
Dictyota dichotoma	prot_D-dichotoma_M_contig2979.10287.1	-0.135778	0.315428	0.908405	5.7776	6.67866	2.55355	2.08797	unbiased
Dictyota dichotoma	prot_D-dichotoma_M_contig2980.10300.1	0.985125	2.43998		0.128848	0.0743788	0.202002	0.166316	not_expressed
Dictyota dichotoma	prot_D-dichotoma_M_contig2980.10301.1	0.837903	3.25801		0.0227847	0	0.0480451	0	not_expressed
Dictyota dichotoma	prot_D-dichotoma_M_contig2984.10307.1	0.583387	0.76275	0.805947	4.66993	3.26663	5.51821	2.63657	unbiased
Dictyota dichotoma	prot_D-dichotoma_M_contig2800.9692.1	1.12902	3.25789		0.0494556	0	0.10771	0	not_expressed
Dictyota dichotoma	prot_D-dichotoma_M_contig2805.9700.1	0.659155	1.05118	0.849755	0.845949	0.546652	0.735804	0.671811	not_expressed
Dictyota dichotoma	prot_D-dichotoma_M_contig2808.9707.1	-0.694763	3.24676		0.02246	0.0676239	0.0473758	0.100268	not_expressed
Dictyota dichotoma	prot_D-dichotoma_M_contig305.10561.1	-1.99728	0.64246	0.0643092	25.9612	102.503	19.7865	104.13	unbiased
Dictyota dichotoma	prot_D-dichotoma_M_contig306.10586.1	0.346984	0.453958	0.805981	48.0863	38.0762	28.1435	16.6586	unbiased
Dictyota dichotoma	prot_D-dichotoma_M_contig306.10587.1	0.418518	0.291793	0.56857	52.4488	40.5354	15.799	21.1902	unbiased
[truncated: 200,130+ more rows]
