# Supplementary material for: Life-cycle-related gene expression patterns in the brown algae
Source: bioRxiv preprint, doi:10.1101/2025.04.25.649966, version 3 (2025-08-12)
Supplement: Table S3 [file 649966_file22.xlsx]

## Sheet: Orthogroups_10_species
Orthogroup	One-to-one orthologue	Dictyota dichotoma	Ectocarpus species 7	Macrocystis pyrifera	Myriotrichia clavaeformis	Pylaiella littoralis	Saccorhiza polyschides	Scytosiphon promiscuus	Saccharina japonica	Saccharina latissima	Sphacelaria rigidula
OG0000000	FALSE	prot_D-dichotoma_M_contig1035.383.1,prot_D-dichotoma_M_contig1035.384.1,prot_D-dichotoma_M_contig104.422.1,prot_D-dichotoma_M_contig1062.594.1,prot_D-dichotoma_M_contig1111.960.1,prot_D-dichotoma_M_contig1122.1051.1,prot_D-dichotoma_M_contig1134.1131.1,prot_D-dichotoma_M_contig1134.1133.1,prot_D-dichotoma_M_contig114.1169.1,prot_D-dichotoma_M_contig1141.1185.1,prot_D-dichotoma_M_contig1141.1186.1…	Ec-00_006625.1,Ec-00_006800.1,Ec-00_007710.1,Ec-01_000470.1,Ec-02_002070.1,Ec-03_000190.1,Ec-04_000490.1,Ec-04_000500.1,Ec-04_001577.1,Ec-04_001580.1,Ec-04_001590.1,Ec-04_002580.1,Ec-05_005130.1,Ec-05_005140.1,Ec-08_004760.1,Ec-09_000730.1,Ec-09_002770.1,Ec-11_000160.1,Ec-11_000300.1,Ec-11_001940.1,Ec-13_000820.1,Ec-13_000830.1,Ec-13_000910.1,Ec-13_000920.1,Ec-13_000930.1,Ec-13_001100.1,Ec-13_001…	prot_M-pyrifera_M_contig10221.473.1,prot_M-pyrifera_M_contig1827.7344.1,prot_M-pyrifera_M_contig1840.7403.1,prot_M-pyrifera_M_contig213.8099.1,prot_M-pyrifera_M_contig213.8100.1,prot_M-pyrifera_M_contig2494.8923.1,prot_M-pyrifera_M_contig2999.9937.1,prot_M-pyrifera_M_contig3064.10083.1,prot_M-pyrifera_M_contig4261.12082.1,prot_M-pyrifera_M_contig4562.12526.1,prot_M-pyrifera_M_contig6026.14959.1,p…	prot_M-clavaeformis_F_contig10280.326.1,prot_M-clavaeformis_F_contig11627.1485.1,prot_M-clavaeformis_F_contig1259.2192.1,prot_M-clavaeformis_F_contig1264.2225.1,prot_M-clavaeformis_F_contig1264.2229.1,prot_M-clavaeformis_F_contig1283.2342.1,prot_M-clavaeformis_F_contig1307.2503.1,prot_M-clavaeformis_F_contig1344.2730.1,prot_M-clavaeformis_F_contig1385.2994.1,prot_M-clavaeformis_F_contig1410.3166.…	prot_P-littoralis_Contig1.229.2,prot_P-littoralis_Contig102.75.1,prot_P-littoralis_Contig106.60.2,prot_P-littoralis_Contig1129.33.1,prot_P-littoralis_Contig113.35.1,prot_P-littoralis_Contig113.56.1,prot_P-littoralis_Contig115.31.1,prot_P-littoralis_Contig1163.8.1,prot_P-littoralis_Contig1207.3.1,prot_P-littoralis_Contig1301.1.1,prot_P-littoralis_Contig138.85.2,prot_P-littoralis_Contig139.15.1,pro…	prot_S-polyschides_M_contig103807.347.1,prot_S-polyschides_M_contig10496.454.1,prot_S-polyschides_M_contig1104.938.1,prot_S-polyschides_M_contig1104.939.1,prot_S-polyschides_M_contig11342.1240.1,prot_S-polyschides_M_contig129420.2661.1,prot_S-polyschides_M_contig1320.2836.1,prot_S-polyschides_M_contig1320.2837.1,prot_S-polyschides_M_contig132771.2890.1,prot_S-polyschides_M_contig1473.3844.1,prot_…	prot_S-promiscuus_M_contig1.72.1,prot_S-promiscuus_M_contig1.93.1,prot_S-promiscuus_M_contig10.869.1,prot_S-promiscuus_M_contig10.872.1,prot_S-promiscuus_M_contig14.2825.1,prot_S-promiscuus_M_contig14.2827.1,prot_S-promiscuus_M_contig14.2852.1,prot_S-promiscuus_M_contig15.3408.1,prot_S-promiscuus_M_contig17.3811.1,prot_S-promiscuus_M_contig25.7312.1,prot_S-promiscuus_M_contig25.7313.1,prot_S-prom…	SJ04543	prot_S-latissima_F_contig10.10.1,prot_S-latissima_F_contig10.11.1,prot_S-latissima_F_contig10.12.1,prot_S-latissima_F_contig1054.465.1,prot_S-latissima_F_contig1059.494.1,prot_S-latissima_F_contig1089.717.1,prot_S-latissima_F_contig1103.882.1,prot_S-latissima_F_contig115.1220.1,prot_S-latissima_F_contig115.1221.1,prot_S-latissima_F_contig115.1222.1,prot_S-latissima_F_contig1194.1515.1,prot_S-lati…	prot_S-rigidula_F_contig10017.2.1,prot_S-rigidula_F_contig10040.1.1,prot_S-rigidula_F_contig10075.1.1,prot_S-rigidula_F_contig10795.2.1,prot_S-rigidula_F_contig10800.1.1,prot_S-rigidula_F_contig10836.4.1,prot_S-rigidula_F_contig11357.1.1,prot_S-rigidula_F_contig1159.3.1,prot_S-rigidula_F_contig11884.1.1,prot_S-rigidula_F_contig1228.1.1,prot_S-rigidula_F_contig12374.2.1,prot_S-rigidula_F_contig126…
OG0000001	FALSE	prot_D-dichotoma_M_contig1207.1677.1,prot_D-dichotoma_M_contig1819.5380.1,prot_D-dichotoma_M_contig2300.7788.1,prot_D-dichotoma_M_contig355.11987.1	Ec-02_000110.1,Ec-02_001090.1,Ec-03_001690.1,Ec-03_001700.1,Ec-03_001780.1,Ec-03_003840.1,Ec-04_001420.1,Ec-05_005360.1,Ec-06_001710.1,Ec-06_003620.1,Ec-07_007330.1,Ec-08_000170.1,Ec-08_000990.1,Ec-08_001140.1,Ec-08_001440.1,Ec-08_001860.1,Ec-11_000430.1,Ec-11_002260.1,Ec-11_005790.1,Ec-13_002260.1,Ec-13_003900.1,Ec-13_003910.1,Ec-13_004140.1,Ec-13_004190.1,Ec-13_004220.1,Ec-13_004230.1,Ec-13_004…	prot_M-pyrifera_M_contig12587.5232.1,prot_M-pyrifera_M_contig14611.6317.1,prot_M-pyrifera_M_contig21041.8040.1,prot_M-pyrifera_M_contig2950.9842.1,prot_M-pyrifera_M_contig386.11491.1,prot_M-pyrifera_M_contig4463.12388.1,prot_M-pyrifera_M_contig5021.13266.1	prot_M-clavaeformis_F_contig1045.472.1,prot_M-clavaeformis_F_contig1045.473.1,prot_M-clavaeformis_F_contig1073.721.1,prot_M-clavaeformis_F_contig1076.748.1,prot_M-clavaeformis_F_contig1130.1230.1,prot_M-clavaeformis_F_contig1130.1234.1,prot_M-clavaeformis_F_contig1135.1265.1,prot_M-clavaeformis_F_contig1135.1268.1,prot_M-clavaeformis_F_contig11422.1332.1,prot_M-clavaeformis_F_contig117.1531.1,pro…	prot_P-littoralis_Contig1126.14.1,prot_P-littoralis_Contig1126.5.1,prot_P-littoralis_Contig170.72.3,prot_P-littoralis_Contig177.77.5,prot_P-littoralis_Contig249.48.1,prot_P-littoralis_Contig26.87.1,prot_P-littoralis_Contig296.26.3,prot_P-littoralis_Contig311.38.2,prot_P-littoralis_Contig311.46.1,prot_P-littoralis_Contig311.49.1,prot_P-littoralis_Contig316.42.1,prot_P-littoralis_Contig33.39.1,prot…	prot_S-polyschides_M_contig109768.870.1,prot_S-polyschides_M_contig114147.1323.1,prot_S-polyschides_M_contig1345.3004.1,prot_S-polyschides_M_contig1855.5907.1,prot_S-polyschides_M_contig2305.7834.1,prot_S-polyschides_M_contig2708.9201.1,prot_S-polyschides_M_contig3176.10460.1,prot_S-polyschides_M_contig3664.11617.1,prot_S-polyschides_M_contig397.12251.1,prot_S-polyschides_M_contig4157.12634.1,pro…	prot_S-promiscuus_M_contig1.663.1,prot_S-promiscuus_M_contig11.1416.1,prot_S-promiscuus_M_contig11.1418.1,prot_S-promiscuus_M_contig11.1419.1,prot_S-promiscuus_M_contig11.1424.1,prot_S-promiscuus_M_contig12.1909.1,prot_S-promiscuus_M_contig12.1912.1,prot_S-promiscuus_M_contig12.1913.1,prot_S-promiscuus_M_contig12.1914.1,prot_S-promiscuus_M_contig12.1915.1,prot_S-promiscuus_M_contig12.1916.1,prot_…	SJ01073,SJ01266,SJ01663,SJ01887,SJ02328,SJ03971,SJ06732,SJ07019,SJ07714,SJ08022,SJ09772,SJ17654,SJ19050,SJ20419,SJ21637	prot_S-latissima_F_contig1210.1652.1,prot_S-latissima_F_contig1210.1653.1,prot_S-latissima_F_contig1385.2858.1,prot_S-latissima_F_contig1602.4147.1,prot_S-latissima_F_contig1768.4894.1,prot_S-latissima_F_contig269.8377.1,prot_S-latissima_F_contig2821.8807.1,prot_S-latissima_F_contig571.13494.1,prot_S-latissima_F_contig723.15116.1,prot_S-latissima_F_contig85.16383.1	prot_S-rigidula_F_contig10344.3.1,prot_S-rigidula_F_contig10422.1.1,prot_S-rigidula_F_contig11872.2.1,prot_S-rigidula_F_contig12964.1.1,prot_S-rigidula_F_contig13573.2.1,prot_S-rigidula_F_contig14383.1.1,prot_S-rigidula_F_contig14991.1.1,prot_S-rigidula_F_contig1772.1.1,prot_S-rigidula_F_contig17942.3.1,prot_S-rigidula_F_contig2023.1.2,prot_S-rigidula_F_contig24546.2.2,prot_S-rigidula_F_contig246…
OG0000002	FALSE	prot_D-dichotoma_M_contig1151.1249.1,prot_D-dichotoma_M_contig1171.1401.1,prot_D-dichotoma_M_contig1173.1408.1,prot_D-dichotoma_M_contig1188.1500.1,prot_D-dichotoma_M_contig1198.1591.1,prot_D-dichotoma_M_contig1347.2619.1,prot_D-dichotoma_M_contig1407.3020.1,prot_D-dichotoma_M_contig1434.3180.1,prot_D-dichotoma_M_contig1442.3243.1,prot_D-dichotoma_M_contig154.3819.1,prot_D-dichotoma_M_contig158.4…	Ec-00_011120.1,Ec-07_000285.1,Ec-11_000290.1	prot_M-pyrifera_M_contig108778.1845.1,prot_M-pyrifera_M_contig16977.6982.1,prot_M-pyrifera_M_contig35740.10983.1,prot_M-pyrifera_M_contig37290.11265.1,prot_M-pyrifera_M_contig4956.13158.1,prot_M-pyrifera_M_contig62710.15407.1,prot_M-pyrifera_M_contig65472.15919.1,prot_M-pyrifera_M_contig8476.19745.1	prot_M-clavaeformis_F_contig2172.6954.1	prot_P-littoralis_Contig1189.4.1,prot_P-littoralis_Contig13.134.1,prot_P-littoralis_Contig150.35.1,prot_P-littoralis_Contig16.57.1,prot_P-littoralis_Contig166.10.1,prot_P-littoralis_Contig183.61.1,prot_P-littoralis_Contig240.43.1,prot_P-littoralis_Contig245.20.1,prot_P-littoralis_Contig26.156.1,prot_P-littoralis_Contig265.31.1,prot_P-littoralis_Contig336.2.1,prot_P-littoralis_Contig342.46.1,prot_…	prot_S-polyschides_M_contig128843.2608.1,prot_S-polyschides_M_contig13044.2730.1,prot_S-polyschides_M_contig14579.3755.1,prot_S-polyschides_M_contig194.6257.1,prot_S-polyschides_M_contig20575.6751.1,prot_S-polyschides_M_contig246.8398.1,prot_S-polyschides_M_contig25089.8569.1,prot_S-polyschides_M_contig302.10065.1,prot_S-polyschides_M_contig427.12833.1,prot_S-polyschides_M_contig52.14286.1,prot_S…	prot_S-promiscuus_M_contig1.90.1,prot_S-promiscuus_M_contig11.1401.1,prot_S-promiscuus_M_contig21.6284.1,prot_S-promiscuus_M_contig25.7307.1,prot_S-promiscuus_M_contig31.9882.1,prot_S-promiscuus_M_contig35.10932.1,prot_S-promiscuus_M_contig41.13101.1,prot_S-promiscuus_M_contig5.15003.1,prot_S-promiscuus_M_contig58.15838.1	SJ00110,SJ01384,SJ01385,SJ05823,SJ05994,SJ07084,SJ07335,SJ10510,SJ10708,SJ11252,SJ11748,SJ11770,SJ12185,SJ12518,SJ12534,SJ13309,SJ13894,SJ15453,SJ15998,SJ16253,SJ17055,SJ17387,SJ18196,SJ18526,SJ19987,SJ21373,SJ21927,SJ22310	prot_S-latissima_F_contig1046.408.1,prot_S-latissima_F_contig152.3642.1,prot_S-latissima_F_contig414.11368.1,prot_S-latissima_F_contig816.16025.1	prot_S-rigidula_F_contig10922.1.1,prot_S-rigidula_F_contig11052.2.1,prot_S-rigidula_F_contig11073.1.1,prot_S-rigidula_F_contig11698.1.1,prot_S-rigidula_F_contig11925.5.1,prot_S-rigidula_F_contig12373.1.3,prot_S-rigidula_F_contig12645.1.1,prot_S-rigidula_F_contig12851.1.1,prot_S-rigidula_F_contig12992.1.1,prot_S-rigidula_F_contig13338.2.1,prot_S-rigidula_F_contig13503.1.1,prot_S-rigidula_F_contig1…
OG0000003	FALSE	NA	Ec-01_007740.1,Ec-01_011840.1,Ec-05_004400.1,Ec-07_003220.1,Ec-07_004140.1,Ec-09_000650.1,Ec-09_001280.1,Ec-16_001840.1,Ec-19_000070.1,Ec-21_003980.1,Ec-23_002070.1,Ec-25_001320.1,Ec-27_000700.1	prot_M-pyrifera_M_contig10200.433.1,prot_M-pyrifera_M_contig105.1080.1,prot_M-pyrifera_M_contig109695.2027.1,prot_M-pyrifera_M_contig112023.2515.1,prot_M-pyrifera_M_contig116691.3457.1,prot_M-pyrifera_M_contig122349.4605.1,prot_M-pyrifera_M_contig124200.4927.1,prot_M-pyrifera_M_contig124856.5051.1,prot_M-pyrifera_M_contig16056.6742.1,prot_M-pyrifera_M_contig26363.9207.1,prot_M-pyrifera_M_contig42…	prot_M-clavaeformis_F_contig10015.88.1,prot_M-clavaeformis_F_contig1030.350.1,prot_M-clavaeformis_F_contig1100.984.1,prot_M-clavaeformis_F_contig1100.985.1,prot_M-clavaeformis_F_contig1112.1075.1,prot_M-clavaeformis_F_contig1113.1089.1,prot_M-clavaeformis_F_contig116.1469.1,prot_M-clavaeformis_F_contig1178.1583.1,prot_M-clavaeformis_F_contig1198.1733.1,prot_M-clavaeformis_F_contig1218.1888.1,prot…	prot_P-littoralis_Contig111.20.2,prot_P-littoralis_Contig117.74.3,prot_P-littoralis_Contig2.466.5,prot_P-littoralis_Contig2.468.1,prot_P-littoralis_Contig299.5.1,prot_P-littoralis_Contig52.11.2,prot_P-littoralis_Contig52.15.4,prot_P-littoralis_Contig6.174.1,prot_P-littoralis_Contig77.14.1	prot_S-polyschides_M_contig10397.361.1,prot_S-polyschides_M_contig10812.731.1,prot_S-polyschides_M_contig12659.2417.1,prot_S-polyschides_M_contig129587.2671.1,prot_S-polyschides_M_contig13093.2770.1,prot_S-polyschides_M_contig132189.2848.1,prot_S-polyschides_M_contig1715.5223.1,prot_S-polyschides_M_contig188.6014.1,prot_S-polyschides_M_contig20881.6882.1,prot_S-polyschides_M_contig21912.7323.1,pr…	prot_S-promiscuus_M_contig1.519.1,prot_S-promiscuus_M_contig1.533.1,prot_S-promiscuus_M_contig15.3128.1,prot_S-promiscuus_M_contig15.3132.1,prot_S-promiscuus_M_contig15.3133.1,prot_S-promiscuus_M_contig15.3139.1,prot_S-promiscuus_M_contig15.3140.1,prot_S-promiscuus_M_contig15.3149.1,prot_S-promiscuus_M_contig2.5270.1,prot_S-promiscuus_M_contig2.5653.1,prot_S-promiscuus_M_contig26.7549.1,prot_S-pr…	SJ01723,SJ02038,SJ04576,SJ05191,SJ06597,SJ09948,SJ09949,SJ09950,SJ09951,SJ12154,SJ12713,SJ15498,SJ16133,SJ16930,SJ20429,SJ20430,SJ20431,SJ20432,SJ20433,SJ20434	prot_S-latissima_F_contig123.1792.1,prot_S-latissima_F_contig21.6374.1,prot_S-latissima_F_contig31.9496.1,prot_S-latissima_F_contig31.9497.1,prot_S-latissima_F_contig40.11110.1,prot_S-latissima_F_contig45.11923.1,prot_S-latissima_F_contig45.11924.1,prot_S-latissima_F_contig525.12991.1,prot_S-latissima_F_contig641.14222.1,prot_S-latissima_F_contig641.14223.1,prot_S-latissima_F_contig730.15176.1,pr…	prot_S-rigidula_F_contig18072.1.1,prot_S-rigidula_F_contig18144.1.1,prot_S-rigidula_F_contig20962.3.1,prot_S-rigidula_F_contig23124.1.1,prot_S-rigidula_F_contig3680.2.1
OG0000004	FALSE	prot_D-dichotoma_M_contig1274.2117.1,prot_D-dichotoma_M_contig1517.3675.1,prot_D-dichotoma_M_contig1517.3676.1,prot_D-dichotoma_M_contig1556.3896.1,prot_D-dichotoma_M_contig1556.3897.1,prot_D-dichotoma_M_contig1638.4433.1,prot_D-dichotoma_M_contig183.5422.1,prot_D-dichotoma_M_contig2062.6623.1,prot_D-dichotoma_M_contig2225.7431.1,prot_D-dichotoma_M_contig2255.7556.1,prot_D-dichotoma_M_contig2257.…	Ec-00_002480.1,Ec-00_005830.1,Ec-00_007630.1,Ec-00_008800.1,Ec-03_001980.1,Ec-03_002000.1,Ec-03_002270.1,Ec-03_002820.1,Ec-05_006290.1,Ec-07_001210.1,Ec-07_002320.1,Ec-07_002560.1,Ec-07_002650.1,Ec-09_004850.1,Ec-10_004560.1,Ec-10_004580.1,Ec-13_003430.1,Ec-19_004360.1,Ec-19_004380.1,Ec-21_005920.1,Ec-23_001740.1,Ec-23_001750.1,Ec-23_003690.1,Ec-23_003700.1,Ec-23_003740.1,Ec-23_003750.1,Ec-23_003…	prot_M-pyrifera_M_contig1335.5928.1,prot_M-pyrifera_M_contig141.6174.1,prot_M-pyrifera_M_contig141.6175.1,prot_M-pyrifera_M_contig19281.7617.1,prot_M-pyrifera_M_contig2465.8858.1,prot_M-pyrifera_M_contig27310.9403.1,prot_M-pyrifera_M_contig36732.11173.1,prot_M-pyrifera_M_contig4613.12604.1,prot_M-pyrifera_M_contig5930.14810.1,prot_M-pyrifera_M_contig6304.15471.1,prot_M-pyrifera_M_contig6561.15945…	prot_M-clavaeformis_F_contig1056.571.1,prot_M-clavaeformis_F_contig12408.2051.1,prot_M-clavaeformis_F_contig1263.2221.1,prot_M-clavaeformis_F_contig13787.2954.1,prot_M-clavaeformis_F_contig1922.5889.1,prot_M-clavaeformis_F_contig1995.6180.1,prot_M-clavaeformis_F_contig2540.8302.1,prot_M-clavaeformis_F_contig369.11670.1,prot_M-clavaeformis_F_contig380.11969.1,prot_M-clavaeformis_F_contig50.14605.1…	prot_P-littoralis_Contig1173.3.7,prot_P-littoralis_Contig12.72.1,prot_P-littoralis_Contig1222.6.74,prot_P-littoralis_Contig137.76.1,prot_P-littoralis_Contig137.77.1,prot_P-littoralis_Contig15.124.1,prot_P-littoralis_Contig168.42.1,prot_P-littoralis_Contig169.50.1,prot_P-littoralis_Contig25.156.2,prot_P-littoralis_Contig25.159.1,prot_P-littoralis_Contig255.5.2,prot_P-littoralis_Contig258.48.1,prot…	prot_S-polyschides_M_contig107209.652.1,prot_S-polyschides_M_contig17144.5221.1,prot_S-polyschides_M_contig21881.7310.1,prot_S-polyschides_M_contig273.9266.1,prot_S-polyschides_M_contig30012.10016.1,prot_S-polyschides_M_contig4208.12727.1,prot_S-polyschides_M_contig456.13312.1,prot_S-polyschides_M_contig49026.13861.1,prot_S-polyschides_M_contig5549.14768.1,prot_S-polyschides_M_contig653.16071.1,p…	prot_S-promiscuus_M_contig12.1925.1,prot_S-promiscuus_M_contig12.1927.1,prot_S-promiscuus_M_contig12.1928.1,prot_S-promiscuus_M_contig12.1930.1,prot_S-promiscuus_M_contig12.1932.1,prot_S-promiscuus_M_contig12.1933.1,prot_S-promiscuus_M_contig13.2574.1,prot_S-promiscuus_M_contig19.4676.1,prot_S-promiscuus_M_contig21.6000.1,prot_S-promiscuus_M_contig24.7127.1,prot_S-promiscuus_M_contig24.7128.1,pro…	SJ00374,SJ01872,SJ02574,SJ02575,SJ02971,SJ02972,SJ02973,SJ02974,SJ03788,SJ03789,SJ03790,SJ03791,SJ03793,SJ03797,SJ03803,SJ06133,SJ06135,SJ06136,SJ06707,SJ07140,SJ07375,SJ07376,SJ07916,SJ08303,SJ11447,SJ11448,SJ11449,SJ11455,SJ13785,SJ13786,SJ13788,SJ13789,SJ13791,SJ16228,SJ16985,SJ17282,SJ17284,SJ18171,SJ19712	prot_S-latissima_F_contig1133.1120.1,prot_S-latissima_F_contig1201.1608.1,prot_S-latissima_F_contig1201.1609.1,prot_S-latissima_F_contig1205.1616.1,prot_S-latissima_F_contig1205.1617.1,prot_S-latissima_F_contig1390.2879.1,prot_S-latissima_F_contig1418.3049.1,prot_S-latissima_F_contig1418.3050.1,prot_S-latissima_F_contig1661.4406.1,prot_S-latissima_F_contig1661.4407.1,prot_S-latissima_F_contig198.…	prot_S-rigidula_F_contig1097.4.1,prot_S-rigidula_F_contig19086.1.2,prot_S-rigidula_F_contig8455.1.1
OG0000005	FALSE	prot_D-dichotoma_M_contig2037.6505.1,prot_D-dichotoma_M_contig774.18601.1,prot_D-dichotoma_M_contig89.19659.1,prot_D-dichotoma_M_contig91.19832.1	Ec-00_006020.1,Ec-01_011630.1,Ec-02_000670.1,Ec-03_001920.1,Ec-04_002670.1,Ec-05_004510.1,Ec-05_004580.1,Ec-05_004660.1,Ec-06_008980.1,Ec-08_002010.1,Ec-08_002200.1,Ec-10_001010.1,Ec-10_005310.1,Ec-10_005380.1,Ec-10_006280.1,Ec-10_006290.1,Ec-11_000110.1,Ec-11_003850.1,Ec-11_005830.1,Ec-16_001080.1,Ec-16_001090.1,Ec-16_001330.1,Ec-16_001830.1,Ec-16_001900.1,Ec-16_002020.1,Ec-16_004900.1,Ec-19_001…	prot_M-pyrifera_M_contig11780.3678.1,prot_M-pyrifera_M_contig17232.7066.1,prot_M-pyrifera_M_contig283.9601.1,prot_M-pyrifera_M_contig3338.10594.1,prot_M-pyrifera_M_contig52960.13734.1	prot_M-clavaeformis_F_contig1003.103.1,prot_M-clavaeformis_F_contig10844.836.1,prot_M-clavaeformis_F_contig10973.935.1,prot_M-clavaeformis_F_contig11101.1060.1,prot_M-clavaeformis_F_contig1112.1072.1,prot_M-clavaeformis_F_contig1149.1376.1,prot_M-clavaeformis_F_contig11652.1500.1,prot_M-clavaeformis_F_contig1176.1571.1,prot_M-clavaeformis_F_contig126.2201.1,prot_M-clavaeformis_F_contig1286.2359.1…	prot_P-littoralis_Contig1167.16.1,prot_P-littoralis_Contig1274.3.1,prot_P-littoralis_Contig16.6.1,prot_P-littoralis_Contig212.80.1,prot_P-littoralis_Contig212.84.1,prot_P-littoralis_Contig262.25.1,prot_P-littoralis_Contig262.27.1,prot_P-littoralis_Contig262.41.1,prot_P-littoralis_Contig28.179.2,prot_P-littoralis_Contig285.55.1,prot_P-littoralis_Contig285.62.1,prot_P-littoralis_Contig285.77.1,prot…	prot_S-polyschides_M_contig11838.1703.1,prot_S-polyschides_M_contig14732.3845.1,prot_S-polyschides_M_contig16413.4835.1,prot_S-polyschides_M_contig17085.5177.1,prot_S-polyschides_M_contig17590.5436.1,prot_S-polyschides_M_contig1984.6449.1,prot_S-polyschides_M_contig21120.6988.1,prot_S-polyschides_M_contig25098.8575.1,prot_S-polyschides_M_contig27419.9302.1,prot_S-polyschides_M_contig28131.9504.1,…	prot_S-promiscuus_M_contig10.1042.1,prot_S-promiscuus_M_contig11.1444.1,prot_S-promiscuus_M_contig21.6062.1,prot_S-promiscuus_M_contig21.6063.1,prot_S-promiscuus_M_contig21.6072.1,prot_S-promiscuus_M_contig23.6890.1,prot_S-promiscuus_M_contig23.6896.1,prot_S-promiscuus_M_contig23.6903.1,prot_S-promiscuus_M_contig25.7404.1,prot_S-promiscuus_M_contig33.10453.1,prot_S-promiscuus_M_contig33.10454.1,p…	SJ00392,SJ01619,SJ16051	prot_S-latissima_F_contig1271.2058.1,prot_S-latissima_F_contig22.6747.1,prot_S-latissima_F_contig566.13405.1	prot_S-rigidula_F_contig11242.1.1,prot_S-rigidula_F_contig12099.2.1,prot_S-rigidula_F_contig14478.1.2,prot_S-rigidula_F_contig3680.3.1,prot_S-rigidula_F_contig4702.2.1,prot_S-rigidula_F_contig5069.1.1,prot_S-rigidula_F_contig5634.1.1,prot_S-rigidula_F_contig6488.1.1,prot_S-rigidula_F_contig7699.3.1
OG0000006	FALSE	prot_D-dichotoma_M_contig1240.1910.1,prot_D-dichotoma_M_contig1300.2339.1,prot_D-dichotoma_M_contig1478.3428.1,prot_D-dichotoma_M_contig2095.6813.1,prot_D-dichotoma_M_contig2095.6814.1,prot_D-dichotoma_M_contig2261.7583.1,prot_D-dichotoma_M_contig2261.7584.1,prot_D-dichotoma_M_contig276.9509.1,prot_D-dichotoma_M_contig276.9510.1,prot_D-dichotoma_M_contig276.9511.1,prot_D-dichotoma_M_contig276.951…	Ec-00_003130.1,Ec-00_003440.1,Ec-02_000020.1,Ec-02_004670.1,Ec-04_002910.1,Ec-06_009400.1,Ec-06_009420.1,Ec-06_011020.1,Ec-17_000460.1,Ec-17_000980.1,Ec-18_000580.1,Ec-18_004290.1,Ec-18_004350.1,Ec-19_005200.1,Ec-19_005430.1,Ec-25_001220.1,Ec-25_001760.1,Ec-27_006380.1,Ec-28_003290.1,Ec-28_003330.1	prot_M-pyrifera_M_contig1123.2577.1,prot_M-pyrifera_M_contig1228.4682.1,prot_M-pyrifera_M_contig2315.8528.1,prot_M-pyrifera_M_contig25735.9069.1,prot_M-pyrifera_M_contig60.14925.1,prot_M-pyrifera_M_contig97064.22362.1,prot_M-pyrifera_M_contig971.22365.1	prot_M-clavaeformis_F_contig1108.1024.1,prot_M-clavaeformis_F_contig117.1535.1,prot_M-clavaeformis_F_contig1276.2294.1,prot_M-clavaeformis_F_contig1344.2728.1,prot_M-clavaeformis_F_contig146.3460.1,prot_M-clavaeformis_F_contig15049.3759.1,prot_M-clavaeformis_F_contig1600.4336.1,prot_M-clavaeformis_F_contig166.4641.1,prot_M-clavaeformis_F_contig1814.5439.1,prot_M-clavaeformis_F_contig182.5467.1,pr…	prot_P-littoralis_Contig1.362.3,prot_P-littoralis_Contig1229.2.4,prot_P-littoralis_Contig29.83.1,prot_P-littoralis_Contig392.46.6,prot_P-littoralis_Contig47.24.1,prot_P-littoralis_Contig47.25.1,prot_P-littoralis_Contig530.17.9,prot_P-littoralis_Contig551.10.1,prot_P-littoralis_Contig551.9.1,prot_P-littoralis_Contig568.2.1,prot_P-littoralis_Contig612.25.1,prot_P-littoralis_Contig632.9.2,prot_P-lit…	prot_S-polyschides_M_contig123760.2212.1,prot_S-polyschides_M_contig1334.2935.1,prot_S-polyschides_M_contig300.10007.1,prot_S-polyschides_M_contig46423.13470.1,prot_S-polyschides_M_contig4890.13841.1	prot_S-promiscuus_M_contig1.306.1,prot_S-promiscuus_M_contig1.308.1,prot_S-promiscuus_M_contig1.313.1,prot_S-promiscuus_M_contig10.944.1,prot_S-promiscuus_M_contig10.946.1,prot_S-promiscuus_M_contig10.952.1,prot_S-promiscuus_M_contig11.1607.1,prot_S-promiscuus_M_contig12.2014.1,prot_S-promiscuus_M_contig12.2022.1,prot_S-promiscuus_M_contig12.2120.1,prot_S-promiscuus_M_contig15.3406.1,prot_S-promi…	SJ00287,SJ00687,SJ01597,SJ01598,SJ02152,SJ02704,SJ02866,SJ03029,SJ03166,SJ03554,SJ05289,SJ05454,SJ05632,SJ05633,SJ05635,SJ05645,SJ06739,SJ06984,SJ07428,SJ08686,SJ09063,SJ09609,SJ09611,SJ09615,SJ09623,SJ10943,SJ10944,SJ10946,SJ11232,SJ11243,SJ14440,SJ15104,SJ15581,SJ16555,SJ17213,SJ17818,SJ18148,SJ19303,SJ19787,SJ19789,SJ20503,SJ21131,SJ22113,SJ22291,SJ22292,SJ22314,SJ22653,SJ22654	prot_S-latissima_F_contig124.1836.1,prot_S-latissima_F_contig124.1837.1,prot_S-latissima_F_contig124.1841.1,prot_S-latissima_F_contig124.1846.1,prot_S-latissima_F_contig124.1847.1,prot_S-latissima_F_contig160.4131.1,prot_S-latissima_F_contig163.4253.1,prot_S-latissima_F_contig1756.4842.1,prot_S-latissima_F_contig198.5839.1,prot_S-latissima_F_contig287.8923.1,prot_S-latissima_F_contig33.9940.1,pro…	prot_S-rigidula_F_contig14495.1.1,prot_S-rigidula_F_contig3878.2.1,prot_S-rigidula_F_contig3878.3.1,prot_S-rigidula_F_contig4705.2.1,prot_S-rigidula_F_contig5004.1.1,prot_S-rigidula_F_contig5797.1.1
OG0000007	FALSE	prot_D-dichotoma_M_contig1096.824.1,prot_D-dichotoma_M_contig1157.1282.1,prot_D-dichotoma_M_contig1171.1400.1,prot_D-dichotoma_M_contig1188.1501.1,prot_D-dichotoma_M_contig120.1627.1,prot_D-dichotoma_M_contig129.2213.1,prot_D-dichotoma_M_contig1324.2499.1,prot_D-dichotoma_M_contig133.2535.1,prot_D-dichotoma_M_contig1352.2662.1,prot_D-dichotoma_M_contig1405.3011.1,prot_D-dichotoma_M_contig1501.360…	NA	prot_M-pyrifera_M_contig15865.6685.1,prot_M-pyrifera_M_contig165.6854.1,prot_M-pyrifera_M_contig18550.7439.1,prot_M-pyrifera_M_contig2738.9426.1,prot_M-pyrifera_M_contig2882.9706.1,prot_M-pyrifera_M_contig4580.12550.1,prot_M-pyrifera_M_contig5012.13243.1,prot_M-pyrifera_M_contig81640.19106.1,prot_M-pyrifera_M_contig908.21044.1	prot_M-clavaeformis_F_contig12336.2005.1,prot_M-clavaeformis_F_contig14761.3564.1,prot_M-clavaeformis_F_contig17888.5289.1,prot_M-clavaeformis_F_contig5735.15901.1	prot_P-littoralis_Contig128.45.2,prot_P-littoralis_Contig1328.9.1,prot_P-littoralis_Contig258.49.1,prot_P-littoralis_Contig468.42.1,prot_P-littoralis_Contig641.34.1,prot_P-littoralis_Contig641.35.1,prot_P-littoralis_Contig644.38.1	prot_S-polyschides_M_contig13847.3300.1,prot_S-polyschides_M_contig28168.9511.1,prot_S-polyschides_M_contig948.19281.1	prot_S-promiscuus_M_contig28.8076.1,prot_S-promiscuus_M_contig33.10375.1,prot_S-promiscuus_M_contig33.10381.1,prot_S-promiscuus_M_contig57.15736.1	SJ00249,SJ00560,SJ01631,SJ01831,SJ03706,SJ05136,SJ06997,SJ09423,SJ10579,SJ21951,SJ22200,SJ22317	prot_S-latissima_F_contig146.3347.1,prot_S-latissima_F_contig256.8036.1	prot_S-rigidula_F_contig10130.2.1,prot_S-rigidula_F_contig10668.1.1,prot_S-rigidula_F_contig10668.2.1,prot_S-rigidula_F_contig10749.1.1,prot_S-rigidula_F_contig11006.2.1,prot_S-rigidula_F_contig11066.1.2,prot_S-rigidula_F_contig11266.1.1,prot_S-rigidula_F_contig12136.1.1,prot_S-rigidula_F_contig12672.1.1,prot_S-rigidula_F_contig1326.1.1,prot_S-rigidula_F_contig13280.1.1,prot_S-rigidula_F_contig13…
OG0000008	FALSE	prot_D-dichotoma_M_contig71.18007.1	Ec-05_002110.1,Ec-05_002140.1,Ec-05_002480.1,Ec-05_002490.1,Ec-07_000040.1,Ec-09_001040.1,Ec-09_001960.1,Ec-09_002000.1,Ec-09_002070.1,Ec-17_000750.1,Ec-21_004590.1,Ec-23_003220.1	prot_M-pyrifera_M_contig120984.4314.1,prot_M-pyrifera_M_contig125532.5156.1,prot_M-pyrifera_M_contig15604.6606.1,prot_M-pyrifera_M_contig19692.7722.1,prot_M-pyrifera_M_contig22379.8339.1,prot_M-pyrifera_M_contig2271.8420.1,prot_M-pyrifera_M_contig2271.8421.1,prot_M-pyrifera_M_contig26564.9251.1,prot_M-pyrifera_M_contig2660.9255.1,prot_M-pyrifera_M_contig27980.9543.1,prot_M-pyrifera_M_contig36483.…	prot_M-clavaeformis_F_contig105.518.1,prot_M-clavaeformis_F_contig122.1901.1,prot_M-clavaeformis_F_contig122.1902.1,prot_M-clavaeformis_F_contig122.1905.1,prot_M-clavaeformis_F_contig133.2644.1,prot_M-clavaeformis_F_contig133.2645.1,prot_M-clavaeformis_F_contig13664.2870.1,prot_M-clavaeformis_F_contig1499.3711.1,prot_M-clavaeformis_F_contig1657.4631.1,prot_M-clavaeformis_F_contig1657.4632.1,prot_…	prot_P-littoralis_Contig166.101.1,prot_P-littoralis_Contig271.2.1,prot_P-littoralis_Contig683.8.1,prot_P-littoralis_Contig816.17.1,prot_P-littoralis_Contig976.18.1	prot_S-polyschides_M_contig11749.1634.1,prot_S-polyschides_M_contig3239.10620.1,prot_S-polyschides_M_contig5224.14317.1,prot_S-polyschides_M_contig777.17463.1,prot_S-polyschides_M_contig8575.18330.1,prot_S-polyschides_M_contig882.18615.1	prot_S-promiscuus_M_contig10.1129.1,prot_S-promiscuus_M_contig15.3170.1,prot_S-promiscuus_M_contig15.3242.1,prot_S-promiscuus_M_contig15.3252.1,prot_S-promiscuus_M_contig15.3253.1,prot_S-promiscuus_M_contig15.3264.1,prot_S-promiscuus_M_contig17.3951.1,prot_S-promiscuus_M_contig17.3953.1,prot_S-promiscuus_M_contig17.3956.1,prot_S-promiscuus_M_contig17.3957.1,prot_S-promiscuus_M_contig17.3963.1,pro…	SJ02146,SJ02149,SJ02266,SJ03075,SJ03438,SJ03439,SJ03441,SJ04202,SJ04203,SJ04356,SJ04357,SJ04358,SJ04359,SJ04360,SJ04361,SJ04362,SJ04368,SJ04369,SJ04370,SJ04373,SJ04374,SJ04882,SJ05461,SJ05462,SJ05860,SJ05861,SJ05862,SJ06571,SJ06877,SJ07286,SJ07569,SJ08054,SJ08561,SJ08696,SJ09311,SJ12663,SJ13226,SJ13242,SJ14551,SJ14553,SJ14554,SJ14555,SJ14556,SJ14557,SJ14558,SJ14559,SJ14560,SJ14561,SJ14562,SJ14564…	prot_S-latissima_F_contig1044.399.1,prot_S-latissima_F_contig1265.2019.1,prot_S-latissima_F_contig153.3707.1,prot_S-latissima_F_contig1865.5323.1,prot_S-latissima_F_contig225.6926.1,prot_S-latissima_F_contig225.6931.1,prot_S-latissima_F_contig225.6932.1,prot_S-latissima_F_contig225.6933.1,prot_S-latissima_F_contig228.7041.1,prot_S-latissima_F_contig228.7042.1,prot_S-latissima_F_contig228.7043.1,p…	prot_S-rigidula_F_contig11398.4.1,prot_S-rigidula_F_contig1964.3.1,prot_S-rigidula_F_contig333.2.1,prot_S-rigidula_F_contig333.5.1
OG0000009	FALSE	prot_D-dichotoma_M_contig2049.6549.1,prot_D-dichotoma_M_contig26.8969.1,prot_D-dichotoma_M_contig3836.12717.1,prot_D-dichotoma_M_contig4001.13176.1,prot_D-dichotoma_M_contig4299.13858.1,prot_D-dichotoma_M_contig5480.16140.1	NA	prot_M-pyrifera_M_contig115882.3298.1,prot_M-pyrifera_M_contig24123.8742.1,prot_M-pyrifera_M_contig79968.18752.1	prot_M-clavaeformis_F_contig11805.1607.1,prot_M-clavaeformis_F_contig12019.1783.1,prot_M-clavaeformis_F_contig15522.4042.1	prot_P-littoralis_Contig1626.1.1	prot_S-polyschides_M_contig115181.1417.1,prot_S-polyschides_M_contig119885.1888.1,prot_S-polyschides_M_contig15224.4123.1,prot_S-polyschides_M_contig1654.4902.1,prot_S-polyschides_M_contig1872.5983.1,prot_S-polyschides_M_contig20843.6864.1,prot_S-polyschides_M_contig2347.7977.1,prot_S-polyschides_M_contig25373.8662.1,prot_S-polyschides_M_contig35021.11299.1,prot_S-polyschides_M_contig35421.11395.…	prot_S-promiscuus_M_contig23.6812.1	SJ00265,SJ00431,SJ00433,SJ00597,SJ00845,SJ01715,SJ01937,SJ01938,SJ02073,SJ02363,SJ03013,SJ03567,SJ03844,SJ04012,SJ04535,SJ04633,SJ04808,SJ05045,SJ05093,SJ05419,SJ05447,SJ05448,SJ05727,SJ06022,SJ06242,SJ06580,SJ06583,SJ06843,SJ07001,SJ07002,SJ07407,SJ07436,SJ07572,SJ07638,SJ07643,SJ07793,SJ07799,SJ07802,SJ07807,SJ07876,SJ07884,SJ07951,SJ08061,SJ08250,SJ08438,SJ08896,SJ08897,SJ08957,SJ09688,SJ09690…	prot_S-latissima_F_contig297.9139.1,prot_S-latissima_F_contig677.14577.1	prot_S-rigidula_F_contig10483.2.1,prot_S-rigidula_F_contig11022.2.1,prot_S-rigidula_F_contig11338.1.1,prot_S-rigidula_F_contig11367.2.1,prot_S-rigidula_F_contig11410.1.1,prot_S-rigidula_F_contig11952.1.1,prot_S-rigidula_F_contig12410.7.1,prot_S-rigidula_F_contig13442.2.1,prot_S-rigidula_F_contig13873.3.1,prot_S-rigidula_F_contig13873.4.1,prot_S-rigidula_F_contig14362.1.1,prot_S-rigidula_F_contig1…
OG0000010	FALSE	NA	Ec-01_002120.1,Ec-03_003700.1,Ec-04_004020.1,Ec-06_006680.1,Ec-06_009980.1,Ec-07_001050.1,Ec-07_001190.1,Ec-07_002980.1,Ec-07_003230.1,Ec-07_003690.1,Ec-07_004040.1,Ec-12_005500.1,Ec-15_001660.1,Ec-15_001670.1,Ec-15_003620.1,Ec-16_001620.1,Ec-19_001790.1,Ec-19_002070.1,Ec-21_003200.1,Ec-23_003450.1,Ec-24_000720.1,Ec-24_002660.1,Ec-24_003190.1,Ec-24_003360.1,Ec-24_004400.1,Ec-25_003350.1,Ec-27_005…	prot_M-pyrifera_M_contig63914.15641.1,prot_M-pyrifera_M_contig74116.17551.1,prot_M-pyrifera_M_contig81712.19132.1	prot_M-clavaeformis_F_contig1.10.1,prot_M-clavaeformis_F_contig1.19.1,prot_M-clavaeformis_F_contig1.20.1,prot_M-clavaeformis_F_contig1.21.1,prot_M-clavaeformis_F_contig1.32.1,prot_M-clavaeformis_F_contig1.33.1,prot_M-clavaeformis_F_contig1.40.1,prot_M-clavaeformis_F_contig1.6.1,prot_M-clavaeformis_F_contig1.7.1,prot_M-clavaeformis_F_contig1141.1322.1,prot_M-clavaeformis_F_contig1156.1432.1,prot_M…	prot_P-littoralis_Contig1011.2.1,prot_P-littoralis_Contig1028.9.1,prot_P-littoralis_Contig126.4.1,prot_P-littoralis_Contig139.25.1,prot_P-littoralis_Contig1399.11.1,prot_P-littoralis_Contig1399.12.1,prot_P-littoralis_Contig158.34.1,prot_P-littoralis_Contig16.3.1,prot_P-littoralis_Contig171.93.1,prot_P-littoralis_Contig192.50.1,prot_P-littoralis_Contig212.82.1,prot_P-littoralis_Contig213.60.1,prot…	prot_S-polyschides_M_contig122152.2075.1,prot_S-polyschides_M_contig1615.4689.1,prot_S-polyschides_M_contig411.12543.1,prot_S-polyschides_M_contig5175.14259.1,prot_S-polyschides_M_contig69526.16601.1,prot_S-polyschides_M_contig946.19249.1,prot_S-polyschides_M_contig946.19255.1,prot_S-polyschides_M_contig97622.19551.1	prot_S-promiscuus_M_contig105.1323.1,prot_S-promiscuus_M_contig13.2513.1,prot_S-promiscuus_M_contig13.2515.1,prot_S-promiscuus_M_contig13.2516.1,prot_S-promiscuus_M_contig17.3779.1,prot_S-promiscuus_M_contig19.4490.1,prot_S-promiscuus_M_contig19.4494.1,prot_S-promiscuus_M_contig24.6968.1,prot_S-promiscuus_M_contig24.6980.1,prot_S-promiscuus_M_contig24.6983.1,prot_S-promiscuus_M_contig24.7050.1,pr…	NA	prot_S-latissima_F_contig1297.2226.1,prot_S-latissima_F_contig1570.3946.1,prot_S-latissima_F_contig238.7431.1	prot_S-rigidula_F_contig278.6.1,prot_S-rigidula_F_contig385.3.1,prot_S-rigidula_F_contig7770.2.1
OG0000011	FALSE	prot_D-dichotoma_M_contig1032.356.1,prot_D-dichotoma_M_contig1034.379.1,prot_D-dichotoma_M_contig1188.1502.1,prot_D-dichotoma_M_contig1266.2060.1,prot_D-dichotoma_M_contig1352.2661.1,prot_D-dichotoma_M_contig1453.3320.1,prot_D-dichotoma_M_contig1779.5163.1,prot_D-dichotoma_M_contig1780.5175.1,prot_D-dichotoma_M_contig180.5298.1,prot_D-dichotoma_M_contig1909.5808.1,prot_D-dichotoma_M_contig2923.10…	NA	prot_M-pyrifera_M_contig1148.3076.1,prot_M-pyrifera_M_contig20786.7984.1,prot_M-pyrifera_M_contig21966.8258.1,prot_M-pyrifera_M_contig25891.9103.1,prot_M-pyrifera_M_contig26957.9332.1,prot_M-pyrifera_M_contig33617.10637.1,prot_M-pyrifera_M_contig3582.11000.1,prot_M-pyrifera_M_contig49075.13072.1,prot_M-pyrifera_M_contig81244.18999.1,prot_M-pyrifera_M_contig953.21984.1	prot_M-clavaeformis_F_contig1124.1184.1,prot_M-clavaeformis_F_contig12428.2069.1,prot_M-clavaeformis_F_contig13630.2855.1,prot_M-clavaeformis_F_contig15079.3776.1,prot_M-clavaeformis_F_contig3661.11599.1,prot_M-clavaeformis_F_contig4826.14237.1,prot_M-clavaeformis_F_contig5937.16247.1,prot_M-clavaeformis_F_contig9065.20383.1	prot_P-littoralis_Contig1025.15.1,prot_P-littoralis_Contig1243.9.1,prot_P-littoralis_Contig1267.2.1,prot_P-littoralis_Contig1328.8.1,prot_P-littoralis_Contig984.19.1	prot_S-polyschides_M_contig106749.598.1,prot_S-polyschides_M_contig114750.1371.1,prot_S-polyschides_M_contig2932.9828.1,prot_S-polyschides_M_contig68438.16463.1,prot_S-polyschides_M_contig86408.18387.1,prot_S-polyschides_M_contig9719.19511.1	prot_S-promiscuus_M_contig12.1919.1,prot_S-promiscuus_M_contig38.11753.1,prot_S-promiscuus_M_contig53.15438.1,prot_S-promiscuus_M_contig59.15899.1	SJ00525,SJ00598,SJ01827,SJ02032,SJ02599,SJ03534,SJ03705,SJ04074,SJ04123,SJ05043,SJ06034,SJ06036,SJ06037,SJ06085,SJ06935,SJ06995,SJ06996,SJ06998,SJ07143,SJ07792,SJ07836,SJ07880,SJ09873,SJ10581,SJ10935,SJ11136,SJ11220,SJ11532,SJ12203,SJ12243,SJ14667,SJ15059,SJ18153,SJ18462,SJ18724,SJ18796,SJ20104,SJ20150,SJ20418,SJ21125,SJ21860	prot_S-latissima_F_contig1402.2976.1,prot_S-latissima_F_contig242.7600.1,prot_S-latissima_F_contig651.14301.1,prot_S-latissima_F_contig910.16915.1	prot_S-rigidula_F_contig10529.1.1,prot_S-rigidula_F_contig10884.1.1,prot_S-rigidula_F_contig10921.1.1,prot_S-rigidula_F_contig12819.1.1,prot_S-rigidula_F_contig12996.1.1,prot_S-rigidula_F_contig13156.1.1,prot_S-rigidula_F_contig13183.1.1,prot_S-rigidula_F_contig13187.1.1,prot_S-rigidula_F_contig13329.1.1,prot_S-rigidula_F_contig13646.1.1,prot_S-rigidula_F_contig13920.2.1,prot_S-rigidula_F_contig1…
OG0000012	FALSE	prot_D-dichotoma_M_contig1.9.1,prot_D-dichotoma_M_contig1139.1155.1,prot_D-dichotoma_M_contig1181.1469.1,prot_D-dichotoma_M_contig1199.1604.1,prot_D-dichotoma_M_contig1219.1761.1,prot_D-dichotoma_M_contig1289.2199.1,prot_D-dichotoma_M_contig1348.2625.1,prot_D-dichotoma_M_contig155.3861.1,prot_D-dichotoma_M_contig1578.4010.1,prot_D-dichotoma_M_contig1657.4543.1,prot_D-dichotoma_M_contig1700.4786.1…	Ec-00_003740.1,Ec-12_000730.1	prot_M-pyrifera_M_contig25961.9129.1,prot_M-pyrifera_M_contig29122.9779.1,prot_M-pyrifera_M_contig30660.10085.1,prot_M-pyrifera_M_contig42900.12128.1,prot_M-pyrifera_M_contig5127.13453.1,prot_M-pyrifera_M_contig7758.18258.1	prot_M-clavaeformis_F_contig1646.4575.1	prot_P-littoralis_Contig1.421.1,prot_P-littoralis_Contig1004.3.1,prot_P-littoralis_Contig1045.12.1,prot_P-littoralis_Contig106.2.1,prot_P-littoralis_Contig1098.11.1,prot_P-littoralis_Contig1114.10.1,prot_P-littoralis_Contig1175.12.1,prot_P-littoralis_Contig12.168.1,prot_P-littoralis_Contig12.245.1,prot_P-littoralis_Contig1229.21.1,prot_P-littoralis_Contig123.108.1,prot_P-littoralis_Contig1260.19.…	prot_S-polyschides_M_contig11633.1533.1,prot_S-polyschides_M_contig11787.1668.1,prot_S-polyschides_M_contig18148.5718.1,prot_S-polyschides_M_contig18195.5739.1,prot_S-polyschides_M_contig2737.9283.1,prot_S-polyschides_M_contig28638.9654.1,prot_S-polyschides_M_contig28638.9655.1,prot_S-polyschides_M_contig4463.13145.1,prot_S-polyschides_M_contig52181.14310.1,prot_S-polyschides_M_contig53059.14414.…	prot_S-promiscuus_M_contig16.3538.1,prot_S-promiscuus_M_contig9.19135.1	SJ01928,SJ02014,SJ07481,SJ07849,SJ18667	prot_S-latissima_F_contig1484.3470.1,prot_S-latissima_F_contig371.10651.1	prot_S-rigidula_F_contig14373.1.1,prot_S-rigidula_F_contig15720.6.1,prot_S-rigidula_F_contig15797.1.1,prot_S-rigidula_F_contig251.4.1,prot_S-rigidula_F_contig251.6.1,prot_S-rigidula_F_contig5520.2.1,prot_S-rigidula_F_contig6255.1.1,prot_S-rigidula_F_contig6898.2.1
OG0000013	FALSE	prot_D-dichotoma_M_contig105.490.1,prot_D-dichotoma_M_contig1176.1428.1,prot_D-dichotoma_M_contig1292.2231.1,prot_D-dichotoma_M_contig537.15948.1,prot_D-dichotoma_M_contig632.17253.1,prot_D-dichotoma_M_contig854.19329.1,prot_D-dichotoma_M_contig912.19864.1	Ec-05_005960.1,Ec-13_000760.1,Ec-13_001200.1,Ec-13_004050.1,Ec-13_004310.1,Ec-13_004320.1,Ec-15_004360.1,Ec-15_004500.1,Ec-25_001630.1	prot_M-pyrifera_M_contig10411.886.1,prot_M-pyrifera_M_contig1808.7297.1,prot_M-pyrifera_M_contig45798.12549.1,prot_M-pyrifera_M_contig9527.21980.1	prot_M-clavaeformis_F_contig1720.4979.1,prot_M-clavaeformis_F_contig1758.5166.1,prot_M-clavaeformis_F_contig1845.5575.1,prot_M-clavaeformis_F_contig193.5917.1,prot_M-clavaeformis_F_contig2131.6803.1,prot_M-clavaeformis_F_contig2131.6804.1,prot_M-clavaeformis_F_contig229.7375.1,prot_M-clavaeformis_F_contig379.11928.1,prot_M-clavaeformis_F_contig399.12414.1,prot_M-clavaeformis_F_contig4606.13779.1,…	prot_P-littoralis_Contig100.8.1,prot_P-littoralis_Contig1085.6.2,prot_P-littoralis_Contig1171.10.1,prot_P-littoralis_Contig193.53.1,prot_P-littoralis_Contig209.3.1,prot_P-littoralis_Contig44.54.1,prot_P-littoralis_Contig44.60.1,prot_P-littoralis_Contig661.37.1,prot_P-littoralis_Contig661.61.1,prot_P-littoralis_Contig69.155.1	prot_S-polyschides_M_contig11938.1837.1,prot_S-polyschides_M_contig16456.4855.1,prot_S-polyschides_M_contig22665.7690.1,prot_S-polyschides_M_contig26180.8917.1,prot_S-polyschides_M_contig53125.14423.1,prot_S-polyschides_M_contig6083.15489.1,prot_S-polyschides_M_contig694.16585.1	prot_S-promiscuus_M_contig1.13.1,prot_S-promiscuus_M_contig1.14.1,prot_S-promiscuus_M_contig1.17.1,prot_S-promiscuus_M_contig1.18.1,prot_S-promiscuus_M_contig1.19.1,prot_S-promiscuus_M_contig1.2.1,prot_S-promiscuus_M_contig1.20.1,prot_S-promiscuus_M_contig1.22.1,prot_S-promiscuus_M_contig1.3.1,prot_S-promiscuus_M_contig1.340.1,prot_S-promiscuus_M_contig1.5.1,prot_S-promiscuus_M_contig1.6.1,prot_S…	SJ00274,SJ00275,SJ00438,SJ01236,SJ01240,SJ01241,SJ01243,SJ01267,SJ03398,SJ04876,SJ05734,SJ05736,SJ05749,SJ06154,SJ06156,SJ06246,SJ06364,SJ06365,SJ06705,SJ07107,SJ07108,SJ07517,SJ07947,SJ07949,SJ08817,SJ08818,SJ09542,SJ12427,SJ12429,SJ13558,SJ15171,SJ15174,SJ15177,SJ15178,SJ15179,SJ15180,SJ15184,SJ15195,SJ17510,SJ18189	prot_S-latissima_F_contig128.2114.1,prot_S-latissima_F_contig1931.5633.1,prot_S-latissima_F_contig2009.6028.1,prot_S-latissima_F_contig2237.6888.1,prot_S-latissima_F_contig2477.7756.1,prot_S-latissima_F_contig2477.7759.1,prot_S-latissima_F_contig2798.8679.1,prot_S-latissima_F_contig281.8769.1,prot_S-latissima_F_contig281.8770.1,prot_S-latissima_F_contig281.8771.1,prot_S-latissima_F_contig314.9585…	prot_S-rigidula_F_contig10460.3.1,prot_S-rigidula_F_contig10623.1.1,prot_S-rigidula_F_contig13644.3.1,prot_S-rigidula_F_contig13835.1.1,prot_S-rigidula_F_contig18910.1.1,prot_S-rigidula_F_contig2120.1.1,prot_S-rigidula_F_contig22504.2.2,prot_S-rigidula_F_contig22977.1.2,prot_S-rigidula_F_contig388.1.1,prot_S-rigidula_F_contig4587.1.1,prot_S-rigidula_F_contig6141.1.1,prot_S-rigidula_F_contig7182.1…
OG0000014	FALSE	prot_D-dichotoma_M_contig1060.576.1,prot_D-dichotoma_M_contig1093.814.1,prot_D-dichotoma_M_contig1133.1129.1,prot_D-dichotoma_M_contig1229.1809.1,prot_D-dichotoma_M_contig1255.1987.1,prot_D-dichotoma_M_contig1258.2010.1,prot_D-dichotoma_M_contig1525.3735.1,prot_D-dichotoma_M_contig1632.4413.1,prot_D-dichotoma_M_contig177.5122.1,prot_D-dichotoma_M_contig2140.7055.1,prot_D-dichotoma_M_contig2212.73…	NA	prot_M-pyrifera_M_contig10613.1326.1,prot_M-pyrifera_M_contig174.7118.1,prot_M-pyrifera_M_contig38033.11379.1,prot_M-pyrifera_M_contig5020.13264.1	prot_M-clavaeformis_F_contig11864.1637.1,prot_M-clavaeformis_F_contig6898.17684.1	prot_P-littoralis_Contig1045.2.1,prot_P-littoralis_Contig1045.3.1,prot_P-littoralis_Contig1167.9.1,prot_P-littoralis_Contig124.102.1,prot_P-littoralis_Contig1495.4.1,prot_P-littoralis_Contig297.55.1,prot_P-littoralis_Contig309.32.1,prot_P-littoralis_Contig311.32.1,prot_P-littoralis_Contig476.12.1,prot_P-littoralis_Contig504.19.1,prot_P-littoralis_Contig66.11.1,prot_P-littoralis_Contig736.1.1,prot…	prot_S-polyschides_M_contig22310.7548.1,prot_S-polyschides_M_contig2617.8913.1,prot_S-polyschides_M_contig3197.10510.1,prot_S-polyschides_M_contig6864.16482.1	prot_S-promiscuus_M_contig18.4141.1,prot_S-promiscuus_M_contig6.16459.1,prot_S-promiscuus_M_contig6.16460.1,prot_S-promiscuus_M_contig68.16950.1	SJ01330,SJ03167,SJ05999,SJ08401,SJ08814,SJ09572,SJ09652,SJ09822,SJ10958,SJ11682,SJ14998,SJ18330,SJ19156,SJ19745,SJ20860,SJ21245,SJ21776,SJ21995	prot_S-latissima_F_contig1011.134.1,prot_S-latissima_F_contig155.3821.1,prot_S-latissima_F_contig356.10390.1,prot_S-latissima_F_contig59.13660.1	prot_S-rigidula_F_contig10153.1.1,prot_S-rigidula_F_contig1201.1.1,prot_S-rigidula_F_contig12617.1.1,prot_S-rigidula_F_contig12965.3.1,prot_S-rigidula_F_contig13132.1.1,prot_S-rigidula_F_contig13227.1.1,prot_S-rigidula_F_contig13280.3.1,prot_S-rigidula_F_contig13476.2.1,prot_S-rigidula_F_contig14065.1.1,prot_S-rigidula_F_contig15414.1.1,prot_S-rigidula_F_contig15816.1.1,prot_S-rigidula_F_contig16…
OG0000015	FALSE	prot_D-dichotoma_M_contig1040.427.1,prot_D-dichotoma_M_contig1181.1471.1,prot_D-dichotoma_M_contig1181.1472.1,prot_D-dichotoma_M_contig1343.2601.1,prot_D-dichotoma_M_contig24.8185.1,prot_D-dichotoma_M_contig3010.10455.1,prot_D-dichotoma_M_contig3403.11606.1,prot_D-dichotoma_M_contig4380.14040.1,prot_D-dichotoma_M_contig4606.14523.1,prot_D-dichotoma_M_contig5318.15869.1,prot_D-dichotoma_M_contig96…	Ec-03_000860.1,Ec-09_004070.1,Ec-14_004740.1,Ec-22_003230.1,Ec-22_003240.1,Ec-24_000710.1,Ec-25_001510.1,Ec-25_001520.1,Ec-25_001570.1	prot_M-pyrifera_M_contig1.1.1,prot_M-pyrifera_M_contig38192.11406.1	prot_M-clavaeformis_F_contig1049.509.1,prot_M-clavaeformis_F_contig1160.1470.1,prot_M-clavaeformis_F_contig1552.4041.1,prot_M-clavaeformis_F_contig162.4431.1,prot_M-clavaeformis_F_contig1883.5732.1,prot_M-clavaeformis_F_contig2388.7726.1,prot_M-clavaeformis_F_contig3040.9905.1,prot_M-clavaeformis_F_contig400.12471.1,prot_M-clavaeformis_F_contig4485.13522.1,prot_M-clavaeformis_F_contig4707.13995.1…	prot_P-littoralis_Contig11.88.4,prot_P-littoralis_Contig11.95.6,prot_P-littoralis_Contig173.68.2,prot_P-littoralis_Contig3.293.1,prot_P-littoralis_Contig609.7.1,prot_P-littoralis_Contig630.7.1,prot_P-littoralis_Contig781.1.2	prot_S-polyschides_M_contig108925.797.1,prot_S-polyschides_M_contig15626.4402.1,prot_S-polyschides_M_contig28284.9552.1,prot_S-polyschides_M_contig3162.10421.1,prot_S-polyschides_M_contig3162.10422.1,prot_S-polyschides_M_contig3283.10738.1,prot_S-polyschides_M_contig34633.11216.1,prot_S-polyschides_M_contig34880.11272.1,prot_S-polyschides_M_contig62582.15736.1	prot_S-promiscuus_M_contig11.1761.1,prot_S-promiscuus_M_contig22.6443.1,prot_S-promiscuus_M_contig25.7341.1,prot_S-promiscuus_M_contig34.10636.1,prot_S-promiscuus_M_contig34.10666.1,prot_S-promiscuus_M_contig34.10691.1,prot_S-promiscuus_M_contig38.11695.1,prot_S-promiscuus_M_contig38.11697.1,prot_S-promiscuus_M_contig38.11698.1,prot_S-promiscuus_M_contig39.11778.1,prot_S-promiscuus_M_contig4.1206…	SJ00273,SJ00322,SJ01193,SJ02342,SJ02966,SJ03062,SJ03063,SJ03270,SJ03366,SJ03520,SJ03687,SJ04148,SJ04687,SJ04823,SJ04866,SJ05129,SJ05267,SJ05493,SJ05504,SJ05519,SJ05718,SJ06937,SJ07016,SJ08074,SJ08448,SJ09920,SJ09937,SJ10030,SJ10204,SJ10205,SJ11086,SJ11359,SJ12396,SJ12398,SJ12399,SJ12822,SJ12824,SJ13253,SJ13267,SJ13268,SJ15035,SJ15036,SJ15077,SJ15490,SJ15913,SJ16525,SJ17437,SJ17539,SJ18170,SJ18379…	prot_S-latissima_F_contig116.1281.1,prot_S-latissima_F_contig1175.1387.1,prot_S-latissima_F_contig1967.5779.1,prot_S-latissima_F_contig223.6873.1,prot_S-latissima_F_contig276.8590.1,prot_S-latissima_F_contig426.11552.1,prot_S-latissima_F_contig578.13556.1,prot_S-latissima_F_contig655.14327.1,prot_S-latissima_F_contig874.16627.1	prot_S-rigidula_F_contig10700.1.1,prot_S-rigidula_F_contig12182.1.1,prot_S-rigidula_F_contig14.3.1,prot_S-rigidula_F_contig16200.1.1,prot_S-rigidula_F_contig24861.1.1,prot_S-rigidula_F_contig2575.2.1,prot_S-rigidula_F_contig26898.1.1,prot_S-rigidula_F_contig4238.4.1,prot_S-rigidula_F_contig4276.2.1,prot_S-rigidula_F_contig4565.9.1,prot_S-rigidula_F_contig464.4.1,prot_S-rigidula_F_contig493.2.1,pr…
OG0000016	FALSE	prot_D-dichotoma_M_contig1001.109.1,prot_D-dichotoma_M_contig1056.521.1,prot_D-dichotoma_M_contig1089.762.1,prot_D-dichotoma_M_contig1121.1043.1,prot_D-dichotoma_M_contig1127.1076.1,prot_D-dichotoma_M_contig1205.1663.1,prot_D-dichotoma_M_contig1225.1796.1,prot_D-dichotoma_M_contig1298.2271.1,prot_D-dichotoma_M_contig133.2527.1,prot_D-dichotoma_M_contig1423.3108.1,prot_D-dichotoma_M_contig1467.338…	Ec-00_004460.1	NA	prot_M-clavaeformis_F_contig4017.12501.1,prot_M-clavaeformis_F_contig4017.12502.1	prot_P-littoralis_Contig1005.10.1,prot_P-littoralis_Contig1012.6.1,prot_P-littoralis_Contig1052.13.3,prot_P-littoralis_Contig1064.1.1,prot_P-littoralis_Contig1064.8.1,prot_P-littoralis_Contig1065.13.1,prot_P-littoralis_Contig1141.20.1,prot_P-littoralis_Contig1146.10.1,prot_P-littoralis_Contig1194.1.1,prot_P-littoralis_Contig1208.3.1,prot_P-littoralis_Contig1223.1.2,prot_P-littoralis_Contig1224.4.…	prot_S-polyschides_M_contig1589.4520.1,prot_S-polyschides_M_contig23742.8085.1,prot_S-polyschides_M_contig43188.12910.1,prot_S-polyschides_M_contig6676.16272.1,prot_S-polyschides_M_contig955.19338.1	prot_S-promiscuus_M_contig10.1179.1,prot_S-promiscuus_M_contig19.4665.1,prot_S-promiscuus_M_contig31.10022.1	SJ01894,SJ07671,SJ13895	prot_S-latissima_F_contig1208.1624.1	prot_S-rigidula_F_contig17556.1.1,prot_S-rigidula_F_contig19395.1.1,prot_S-rigidula_F_contig25678.2.1
OG0000017	FALSE	prot_D-dichotoma_M_contig2821.9762.1	Ec-00_009440.1,Ec-03_001820.1	prot_M-pyrifera_M_contig13969.6125.1,prot_M-pyrifera_M_contig28881.9719.1,prot_M-pyrifera_M_contig4282.12114.1,prot_M-pyrifera_M_contig5487.14059.1	prot_M-clavaeformis_F_contig5254.15105.1	prot_P-littoralis_Contig102.20.1,prot_P-littoralis_Contig1183.1.1,prot_P-littoralis_Contig1227.3.1,prot_P-littoralis_Contig139.22.1,prot_P-littoralis_Contig1412.2.1,prot_P-littoralis_Contig1412.3.1,prot_P-littoralis_Contig174.73.1,prot_P-littoralis_Contig227.59.1,prot_P-littoralis_Contig802.3.1,prot_P-littoralis_Contig976.16.1,prot_P-littoralis_Contig98.124.1	prot_S-polyschides_M_contig100.1.1,prot_S-polyschides_M_contig11093.989.1,prot_S-polyschides_M_contig116.1493.1,prot_S-polyschides_M_contig12668.2428.1,prot_S-polyschides_M_contig163.4764.1,prot_S-polyschides_M_contig165.4875.1,prot_S-polyschides_M_contig165.4876.1,prot_S-polyschides_M_contig17987.5609.1,prot_S-polyschides_M_contig18262.5773.1,prot_S-polyschides_M_contig18864.6032.1,prot_S-polysc…	prot_S-promiscuus_M_contig28.8082.1,prot_S-promiscuus_M_contig35.10920.1	SJ00471,SJ00474,SJ03474,SJ05525,SJ17418,SJ17419,SJ18852	prot_S-latissima_F_contig101.102.1,prot_S-latissima_F_contig1109.899.1,prot_S-latissima_F_contig1117.947.1,prot_S-latissima_F_contig1324.2456.1,prot_S-latissima_F_contig146.3348.1,prot_S-latissima_F_contig1852.5280.1,prot_S-latissima_F_contig1856.5290.1,prot_S-latissima_F_contig283.8837.1,prot_S-latissima_F_contig44.11770.1,prot_S-latissima_F_contig861.16493.1,prot_S-latissima_F_contig948.17210.1	prot_S-rigidula_F_contig10568.3.1,prot_S-rigidula_F_contig10651.1.1,prot_S-rigidula_F_contig10782.1.1,prot_S-rigidula_F_contig11346.1.1,prot_S-rigidula_F_contig11378.1.1,prot_S-rigidula_F_contig11468.1.1,prot_S-rigidula_F_contig11814.1.1,prot_S-rigidula_F_contig12574.1.1,prot_S-rigidula_F_contig1262.1.1,prot_S-rigidula_F_contig12822.1.1,prot_S-rigidula_F_contig13420.1.1,prot_S-rigidula_F_contig13…
OG0000018	FALSE	prot_D-dichotoma_M_contig1824.5403.1,prot_D-dichotoma_M_contig2097.6816.1,prot_D-dichotoma_M_contig216.7155.1,prot_D-dichotoma_M_contig2766.9531.1,prot_D-dichotoma_M_contig3319.11401.1,prot_D-dichotoma_M_contig383.12702.1	Ec-03_002340.1,Ec-05_003820.1,Ec-05_005490.1,Ec-07_001460.1,Ec-07_001540.1,Ec-07_001550.1,Ec-14_001160.1,Ec-18_000630.1,Ec-18_003350.1,Ec-18_003540.1,Ec-18_003670.1,Ec-24_002380.1,Ec-28_003050.1	prot_M-pyrifera_M_contig10528.1132.1,prot_M-pyrifera_M_contig112011.2512.1,prot_M-pyrifera_M_contig14692.6334.1,prot_M-pyrifera_M_contig17379.7108.1,prot_M-pyrifera_M_contig20236.7849.1,prot_M-pyrifera_M_contig24533.8829.1,prot_M-pyrifera_M_contig3010.9966.1,prot_M-pyrifera_M_contig32939.10513.1,prot_M-pyrifera_M_contig32974.10522.1,prot_M-pyrifera_M_contig41864.11977.1,prot_M-pyrifera_M_contig46…	prot_M-clavaeformis_F_contig1087.848.1,prot_M-clavaeformis_F_contig1124.1183.1,prot_M-clavaeformis_F_contig12736.2282.1,prot_M-clavaeformis_F_contig155.4023.1,prot_M-clavaeformis_F_contig196.6035.1,prot_M-clavaeformis_F_contig196.6036.1,prot_M-clavaeformis_F_contig2657.8710.1,prot_M-clavaeformis_F_contig3669.11614.1,prot_M-clavaeformis_F_contig51.14815.1,prot_M-clavaeformis_F_contig522.15041.1,pr…	prot_P-littoralis_Contig107.121.2,prot_P-littoralis_Contig107.123.2,prot_P-littoralis_Contig1232.8.1,prot_P-littoralis_Contig1232.9.1,prot_P-littoralis_Contig16.159.1,prot_P-littoralis_Contig193.24.3,prot_P-littoralis_Contig244.13.2,prot_P-littoralis_Contig3.241.2,prot_P-littoralis_Contig301.37.2,prot_P-littoralis_Contig306.10.2,prot_P-littoralis_Contig85.53.1	prot_S-polyschides_M_contig1097.861.1,prot_S-polyschides_M_contig1140.1311.1,prot_S-polyschides_M_contig12665.2425.1,prot_S-polyschides_M_contig12665.2426.1,prot_S-polyschides_M_contig15739.4446.1,prot_S-polyschides_M_contig18328.5796.1,prot_S-polyschides_M_contig19504.6301.1,prot_S-polyschides_M_contig24003.8179.1,prot_S-polyschides_M_contig24461.8346.1,prot_S-polyschides_M_contig24638.8410.1,pr…	prot_S-promiscuus_M_contig13.2510.1,prot_S-promiscuus_M_contig28.8191.1,prot_S-promiscuus_M_contig28.8199.1,prot_S-promiscuus_M_contig28.8201.1,prot_S-promiscuus_M_contig28.8223.1,prot_S-promiscuus_M_contig31.9907.1,prot_S-promiscuus_M_contig4.12628.1,prot_S-promiscuus_M_contig41.12922.1,prot_S-promiscuus_M_contig46.13888.1,prot_S-promiscuus_M_contig53.15360.1,prot_S-promiscuus_M_contig53.15367.1…	SJ00627,SJ03378,SJ03379,SJ03380,SJ03389,SJ03390,SJ05707,SJ06205,SJ08172,SJ10109,SJ14278,SJ15149,SJ18899	prot_S-latissima_F_contig1189.1474.1,prot_S-latissima_F_contig1212.1658.1,prot_S-latissima_F_contig1280.2128.1,prot_S-latissima_F_contig2028.6107.1,prot_S-latissima_F_contig218.6661.1,prot_S-latissima_F_contig2299.7104.1,prot_S-latissima_F_contig2459.7695.1,prot_S-latissima_F_contig320.9723.1,prot_S-latissima_F_contig4086.11264.1,prot_S-latissima_F_contig593.13691.1,prot_S-latissima_F_contig593.1…	prot_S-rigidula_F_contig12856.7.1,prot_S-rigidula_F_contig15950.1.1,prot_S-rigidula_F_contig16582.1.1,prot_S-rigidula_F_contig17318.1.1,prot_S-rigidula_F_contig18098.2.1,prot_S-rigidula_F_contig21009.1.1,prot_S-rigidula_F_contig21298.1.1,prot_S-rigidula_F_contig26693.1.1,prot_S-rigidula_F_contig2811.2.2,prot_S-rigidula_F_contig3602.2.1,prot_S-rigidula_F_contig4121.1.1,prot_S-rigidula_F_contig4121…
OG0000019	FALSE	prot_D-dichotoma_M_contig1411.3053.1,prot_D-dichotoma_M_contig1568.3971.1,prot_D-dichotoma_M_contig1693.4724.1,prot_D-dichotoma_M_contig1699.4757.1,prot_D-dichotoma_M_contig1996.6229.1,prot_D-dichotoma_M_contig1996.6230.1,prot_D-dichotoma_M_contig1996.6233.1,prot_D-dichotoma_M_contig1996.6234.1,prot_D-dichotoma_M_contig2142.7065.1,prot_D-dichotoma_M_contig223.7457.1,prot_D-dichotoma_M_contig3189.…	Ec-00_006370.1,Ec-00_006380.1,Ec-11_000400.1,Ec-18_000130.1,Ec-18_000150.1,Ec-19_003150.1,Ec-19_003160.1,Ec-24_001130.1,Ec-24_001140.1	prot_M-pyrifera_M_contig10150.315.1,prot_M-pyrifera_M_contig11408.2934.1,prot_M-pyrifera_M_contig18270.7357.1,prot_M-pyrifera_M_contig2713.9370.1,prot_M-pyrifera_M_contig482.12932.1,prot_M-pyrifera_M_contig510.13408.1,prot_M-pyrifera_M_contig5537.14138.1,prot_M-pyrifera_M_contig65.15839.1	prot_M-clavaeformis_F_contig1447.3374.1,prot_M-clavaeformis_F_contig231.7455.1,prot_M-clavaeformis_F_contig355.11308.1,prot_M-clavaeformis_F_contig355.11309.1	prot_P-littoralis_Contig11.81.2,prot_P-littoralis_Contig238.8.2,prot_P-littoralis_Contig238.9.2,prot_P-littoralis_Contig264.28.1	prot_S-polyschides_M_contig2944.9863.1,prot_S-polyschides_M_contig38568.12036.1,prot_S-polyschides_M_contig6257.15735.1,prot_S-polyschides_M_contig8446.18167.1	prot_S-promiscuus_M_contig21.6053.1,prot_S-promiscuus_M_contig21.6054.1,prot_S-promiscuus_M_contig30.9739.1,prot_S-promiscuus_M_contig60.16623.1	SJ03359,SJ04550,SJ06823,SJ07246,SJ07248,SJ07249,SJ07250,SJ07251,SJ07252,SJ07253,SJ07254,SJ07255,SJ07256,SJ07257,SJ07258,SJ07259,SJ07260,SJ07277,SJ07285,SJ07296,SJ09197,SJ12394,SJ12582,SJ12583,SJ12584,SJ12591,SJ12592,SJ12593,SJ14577,SJ15955,SJ16086,SJ16087,SJ16088,SJ16091,SJ16092,SJ16093,SJ16094,SJ16095,SJ16096,SJ16097,SJ19995,SJ19997,SJ19998,SJ19999,SJ20000,SJ20001,SJ22025,SJ22027,SJ22028,SJ22030…	prot_S-latissima_F_contig1893.5454.1,prot_S-latissima_F_contig1893.5455.1,prot_S-latissima_F_contig291.9031.1,prot_S-latissima_F_contig3076.9438.1,prot_S-latissima_F_contig37.10624.1,prot_S-latissima_F_contig37.10625.1,prot_S-latissima_F_contig37.10626.1,prot_S-latissima_F_contig37.10627.1,prot_S-latissima_F_contig37.10628.1,prot_S-latissima_F_contig37.10629.1,prot_S-latissima_F_contig37.10630.1,…	prot_S-rigidula_F_contig10283.1.1,prot_S-rigidula_F_contig1096.3.1,prot_S-rigidula_F_contig15319.2.1,prot_S-rigidula_F_contig16746.1.1,prot_S-rigidula_F_contig25612.1.1,prot_S-rigidula_F_contig8579.1.1
OG0000020	FALSE	prot_D-dichotoma_M_contig1049.479.1,prot_D-dichotoma_M_contig1082.709.1,prot_D-dichotoma_M_contig1171.1403.1,prot_D-dichotoma_M_contig1222.1783.1,prot_D-dichotoma_M_contig1587.4068.1,prot_D-dichotoma_M_contig1831.5432.1,prot_D-dichotoma_M_contig2132.7023.1,prot_D-dichotoma_M_contig3109.10769.1,prot_D-dichotoma_M_contig3332.11441.1,prot_D-dichotoma_M_contig3463.11773.1,prot_D-dichotoma_M_contig630…	Ec-05_006530.1,Ec-05_006540.1,Ec-06_003420.1,Ec-07_006970.1,Ec-07_006980.1,Ec-07_006990.1,Ec-07_007050.1,Ec-07_007160.1,Ec-13_001560.1,Ec-13_004400.1,Ec-13_004430.1,Ec-21_000380.1,Ec-21_000390.1,Ec-21_000400.1,Ec-21_000420.1,Ec-21_000430.1,Ec-21_000440.1,Ec-21_000460.1,Ec-21_000470.1,Ec-21_000480.1,Ec-21_000490.1,Ec-21_000500.1,Ec-21_000510.1,Ec-21_000520.1,Ec-21_000530.1,Ec-21_000540.1,Ec-21_000…	prot_M-pyrifera_M_contig1142.2957.1,prot_M-pyrifera_M_contig12745.5526.1,prot_M-pyrifera_M_contig13146.5863.1,prot_M-pyrifera_M_contig27803.9509.1,prot_M-pyrifera_M_contig3880.11537.1,prot_M-pyrifera_M_contig3926.11600.1	prot_M-clavaeformis_F_contig130.2463.1,prot_M-clavaeformis_F_contig130.2464.1,prot_M-clavaeformis_F_contig1712.4943.1,prot_M-clavaeformis_F_contig2966.9665.1,prot_M-clavaeformis_F_contig322.10428.1,prot_M-clavaeformis_F_contig4246.13016.1,prot_M-clavaeformis_F_contig4305.13137.1,prot_M-clavaeformis_F_contig456.13664.1,prot_M-clavaeformis_F_contig5041.14700.1,prot_M-clavaeformis_F_contig698.17806.…	prot_P-littoralis_Contig447.12.2	prot_S-polyschides_M_contig116459.1549.1,prot_S-polyschides_M_contig12978.2683.1,prot_S-polyschides_M_contig1442.3677.1,prot_S-polyschides_M_contig18632.5941.1,prot_S-polyschides_M_contig2112.6982.1,prot_S-polyschides_M_contig2919.9788.1,prot_S-polyschides_M_contig422.12740.1,prot_S-polyschides_M_contig4841.13786.1,prot_S-polyschides_M_contig5301.14407.1,prot_S-polyschides_M_contig589.15248.1,pro…	prot_S-promiscuus_M_contig32.10154.1,prot_S-promiscuus_M_contig32.10155.1,prot_S-promiscuus_M_contig32.10163.1,prot_S-promiscuus_M_contig32.10164.1,prot_S-promiscuus_M_contig32.10166.1,prot_S-promiscuus_M_contig32.10167.1,prot_S-promiscuus_M_contig32.10168.1,prot_S-promiscuus_M_contig32.10169.1,prot_S-promiscuus_M_contig32.10170.1,prot_S-promiscuus_M_contig32.10171.1,prot_S-promiscuus_M_contig32.…	SJ01222,SJ01230,SJ17239	prot_S-latissima_F_contig391.10955.1,prot_S-latissima_F_contig391.10957.1,prot_S-latissima_F_contig391.10958.1,prot_S-latissima_F_contig391.10959.1,prot_S-latissima_F_contig391.10960.1,prot_S-latissima_F_contig391.10961.1,prot_S-latissima_F_contig391.10962.1,prot_S-latissima_F_contig391.10963.1,prot_S-latissima_F_contig391.10964.1,prot_S-latissima_F_contig391.10965.1,prot_S-latissima_F_contig391.…	prot_S-rigidula_F_contig14882.1.1,prot_S-rigidula_F_contig1642.5.1,prot_S-rigidula_F_contig1928.1.1,prot_S-rigidula_F_contig3617.1.1,prot_S-rigidula_F_contig5587.1.1,prot_S-rigidula_F_contig7314.1.1
OG0000021	FALSE	prot_D-dichotoma_M_contig111.944.1,prot_D-dichotoma_M_contig1112.968.1,prot_D-dichotoma_M_contig1167.1362.1,prot_D-dichotoma_M_contig1188.1498.1,prot_D-dichotoma_M_contig146.3352.1,prot_D-dichotoma_M_contig1549.3853.1,prot_D-dichotoma_M_contig1649.4492.1,prot_D-dichotoma_M_contig1729.4924.1,prot_D-dichotoma_M_contig2106.6888.1,prot_D-dichotoma_M_contig2109.6900.1,prot_D-dichotoma_M_contig258.8878…	NA	prot_M-pyrifera_M_contig6512.15858.1	NA	NA	prot_S-polyschides_M_contig92104.19013.1	prot_S-promiscuus_M_contig10.949.1,prot_S-promiscuus_M_contig13.2633.1,prot_S-promiscuus_M_contig16.3656.1,prot_S-promiscuus_M_contig30.9569.1,prot_S-promiscuus_M_contig32.10333.1,prot_S-promiscuus_M_contig38.11638.1,prot_S-promiscuus_M_contig44.13457.1,prot_S-promiscuus_M_contig47.13960.1,prot_S-promiscuus_M_contig53.15450.1	SJ09389,SJ20179	prot_S-latissima_F_contig143.3120.1,prot_S-latissima_F_contig1832.5218.1,prot_S-latissima_F_contig3563.10402.1	prot_S-rigidula_F_contig10601.1.1,prot_S-rigidula_F_contig10884.2.1,prot_S-rigidula_F_contig11151.1.1,prot_S-rigidula_F_contig11913.1.1,prot_S-rigidula_F_contig12009.1.1,prot_S-rigidula_F_contig12210.1.1,prot_S-rigidula_F_contig12223.1.1,prot_S-rigidula_F_contig12494.2.1,prot_S-rigidula_F_contig12783.1.1,prot_S-rigidula_F_contig12973.1.1,prot_S-rigidula_F_contig13023.2.1,prot_S-rigidula_F_contig1…
OG0000022	FALSE	prot_D-dichotoma_M_contig1916.5856.1,prot_D-dichotoma_M_contig2131.7021.1,prot_D-dichotoma_M_contig2938.10157.1,prot_D-dichotoma_M_contig3064.10608.1,prot_D-dichotoma_M_contig3064.10610.1,prot_D-dichotoma_M_contig4217.13693.1,prot_D-dichotoma_M_contig583.16673.1	Ec-03_000740.1,Ec-03_004500.1,Ec-10_002030.1,Ec-10_002050.1,Ec-10_003070.1,Ec-11_002410.1,Ec-11_006310.1,Ec-22_002160.1,Ec-26_006670.1	prot_M-pyrifera_M_contig114320.2988.1	prot_M-clavaeformis_F_contig1021.272.1,prot_M-clavaeformis_F_contig115.1381.1,prot_M-clavaeformis_F_contig2213.7111.1,prot_M-clavaeformis_F_contig2296.7393.1,prot_M-clavaeformis_F_contig2348.7590.1,prot_M-clavaeformis_F_contig2485.8099.1,prot_M-clavaeformis_F_contig2874.9401.1,prot_M-clavaeformis_F_contig3015.9834.1,prot_M-clavaeformis_F_contig3465.11098.1,prot_M-clavaeformis_F_contig3697.11689.1…	NA	prot_S-polyschides_M_contig13476.3020.1,prot_S-polyschides_M_contig2286.7761.1,prot_S-polyschides_M_contig2469.8432.1	prot_S-promiscuus_M_contig1.205.1,prot_S-promiscuus_M_contig102.1310.1,prot_S-promiscuus_M_contig12.1868.1,prot_S-promiscuus_M_contig12.2039.1,prot_S-promiscuus_M_contig12.2060.1,prot_S-promiscuus_M_contig12.2083.1,prot_S-promiscuus_M_contig15.3390.1,prot_S-promiscuus_M_contig17.3774.1,prot_S-promiscuus_M_contig17.4000.1,prot_S-promiscuus_M_contig17.4036.1,prot_S-promiscuus_M_contig20.5798.1,prot…	SJ00185,SJ00556,SJ00559,SJ01289,SJ01532,SJ02080,SJ02476,SJ02478,SJ02614,SJ02754,SJ02876,SJ03087,SJ03088,SJ03165,SJ03494,SJ03672,SJ03674,SJ03987,SJ04020,SJ04149,SJ04150,SJ04154,SJ04541,SJ05979,SJ07247,SJ07552,SJ07702,SJ07939,SJ08496,SJ08499,SJ08501,SJ08505,SJ09926,SJ10021,SJ11526,SJ12194,SJ14857,SJ15915,SJ16969,SJ18028,SJ18154,SJ18155,SJ18521,SJ18522,SJ18881,SJ18938,SJ18985,SJ19184,SJ19289,SJ19291…	prot_S-latissima_F_contig1214.1660.1,prot_S-latissima_F_contig1927.5616.1,prot_S-latissima_F_contig2944.9072.1,prot_S-latissima_F_contig532.13086.1,prot_S-latissima_F_contig898.16774.1,prot_S-latissima_F_contig97.17443.1	prot_S-rigidula_F_contig623.3.1
OG0000023	FALSE	prot_D-dichotoma_M_contig1167.1363.1,prot_D-dichotoma_M_contig1335.2561.1,prot_D-dichotoma_M_contig1409.3033.1,prot_D-dichotoma_M_contig318.10970.1,prot_D-dichotoma_M_contig342.11652.1,prot_D-dichotoma_M_contig3449.11712.1,prot_D-dichotoma_M_contig498.15212.1,prot_D-dichotoma_M_contig655.17489.1,prot_D-dichotoma_M_contig882.19585.1,prot_D-dichotoma_M_contig882.19587.1,prot_D-dichotoma_M_contig882…	Ec-03_001110.1,Ec-04_003370.1,Ec-05_000830.1,Ec-06_000290.1,Ec-07_002040.1,Ec-07_003950.1,Ec-07_006800.1,Ec-09_001910.1,Ec-14_002490.1,Ec-18_003010.1,Ec-19_000770.1,Ec-22_002960.1,Ec-26_004820.1	prot_M-pyrifera_M_contig10656.1422.1,prot_M-pyrifera_M_contig113505.2816.1,prot_M-pyrifera_M_contig123538.4811.1,prot_M-pyrifera_M_contig17262.7080.1,prot_M-pyrifera_M_contig18897.7530.1,prot_M-pyrifera_M_contig20286.7861.1,prot_M-pyrifera_M_contig37349.11275.1,prot_M-pyrifera_M_contig4210.12012.1,prot_M-pyrifera_M_contig4571.12542.1,prot_M-pyrifera_M_contig52473.13640.1,prot_M-pyrifera_M_contig5…	prot_M-clavaeformis_F_contig1422.3230.1,prot_M-clavaeformis_F_contig1479.3581.1,prot_M-clavaeformis_F_contig1824.5492.1,prot_M-clavaeformis_F_contig1966.6057.1,prot_M-clavaeformis_F_contig1973.6091.1,prot_M-clavaeformis_F_contig248.8073.1,prot_M-clavaeformis_F_contig3093.10074.1,prot_M-clavaeformis_F_contig3160.10275.1,prot_M-clavaeformis_F_contig3684.11657.1,prot_M-clavaeformis_F_contig5223.1504…	prot_P-littoralis_Contig148.91.6,prot_P-littoralis_Contig162.64.1,prot_P-littoralis_Contig166.76.1,prot_P-littoralis_Contig171.69.2,prot_P-littoralis_Contig182.110.1,prot_P-littoralis_Contig203.79.1,prot_P-littoralis_Contig30.107.4,prot_P-littoralis_Contig318.79.1,prot_P-littoralis_Contig397.28.1,prot_P-littoralis_Contig471.1.11,prot_P-littoralis_Contig687.20.2,prot_P-littoralis_Contig705.5.1,pro…	prot_S-polyschides_M_contig10819.737.1,prot_S-polyschides_M_contig119.1799.1,prot_S-polyschides_M_contig119.1800.1,prot_S-polyschides_M_contig11989.1889.1,prot_S-polyschides_M_contig12561.2350.1,prot_S-polyschides_M_contig1286.2589.1,prot_S-polyschides_M_contig17921.5581.1,prot_S-polyschides_M_contig1829.5781.1,prot_S-polyschides_M_contig18492.5873.1,prot_S-polyschides_M_contig23349.7923.1,prot_S…	prot_S-promiscuus_M_contig14.2795.1,prot_S-promiscuus_M_contig15.3241.1,prot_S-promiscuus_M_contig20.5718.1,prot_S-promiscuus_M_contig24.7017.1,prot_S-promiscuus_M_contig24.7195.1,prot_S-promiscuus_M_contig26.7617.1,prot_S-promiscuus_M_contig28.8279.1,prot_S-promiscuus_M_contig3.9532.1,prot_S-promiscuus_M_contig31.10085.1,prot_S-promiscuus_M_contig39.11913.1,prot_S-promiscuus_M_contig4.12272.1,pr…	SJ07340,SJ07453,SJ07870,SJ09447,SJ12071,SJ12073,SJ13725,SJ14190,SJ16391,SJ16924,SJ17223,SJ17307,SJ19396,SJ19397	prot_S-latissima_F_contig110.838.1,prot_S-latissima_F_contig139.2878.1,prot_S-latissima_F_contig1475.3430.1,prot_S-latissima_F_contig1578.3964.1,prot_S-latissima_F_contig1578.3967.1,prot_S-latissima_F_contig1678.4481.1,prot_S-latissima_F_contig2635.8245.1,prot_S-latissima_F_contig351.10299.1,prot_S-latissima_F_contig565.13399.1,prot_S-latissima_F_contig565.13400.1	prot_S-rigidula_F_contig15943.2.1,prot_S-rigidula_F_contig17984.1.1,prot_S-rigidula_F_contig17984.2.1,prot_S-rigidula_F_contig2478.3.1,prot_S-rigidula_F_contig26620.1.1,prot_S-rigidula_F_contig2755.3.1,prot_S-rigidula_F_contig3094.5.2,prot_S-rigidula_F_contig5754.1.1,prot_S-rigidula_F_contig6539.1.1,prot_S-rigidula_F_contig8156.1.1
OG0000024	FALSE	prot_D-dichotoma_M_contig422.13710.1,prot_D-dichotoma_M_contig793.18755.1,prot_D-dichotoma_M_contig793.18756.1	Ec-01_011280.1,Ec-01_011350.1,Ec-01_011390.1,Ec-01_012020.1,Ec-06_000020.1,Ec-06_001020.1,Ec-08_001200.1,Ec-08_001220.1,Ec-15_001940.1,Ec-16_003960.1,Ec-17_000590.1,Ec-25_000110.1,Ec-26_002110.1	prot_M-pyrifera_M_contig14461.6271.1,prot_M-pyrifera_M_contig1468.6332.1	prot_M-clavaeformis_F_contig105.522.1,prot_M-clavaeformis_F_contig1059.599.1,prot_M-clavaeformis_F_contig10614.633.1,prot_M-clavaeformis_F_contig1151.1401.1,prot_M-clavaeformis_F_contig11860.1635.1,prot_M-clavaeformis_F_contig1352.2788.1,prot_M-clavaeformis_F_contig1519.3837.1,prot_M-clavaeformis_F_contig1539.3960.1,prot_M-clavaeformis_F_contig1539.3961.1,prot_M-clavaeformis_F_contig1689.4798.1,p…	prot_P-littoralis_Contig1156.15.12,prot_P-littoralis_Contig1194.15.11,prot_P-littoralis_Contig1194.7.4,prot_P-littoralis_Contig12.68.4,prot_P-littoralis_Contig1282.16.1,prot_P-littoralis_Contig1282.6.2,prot_P-littoralis_Contig13.129.1,prot_P-littoralis_Contig1333.10.1,prot_P-littoralis_Contig16.180.1,prot_P-littoralis_Contig185.13.7,prot_P-littoralis_Contig187.13.3,prot_P-littoralis_Contig312.9.3…	prot_S-polyschides_M_contig10327.304.1,prot_S-polyschides_M_contig111915.1077.1,prot_S-polyschides_M_contig9375.19147.1	prot_S-promiscuus_M_contig1.10.1,prot_S-promiscuus_M_contig1.8.1,prot_S-promiscuus_M_contig11.1429.1,prot_S-promiscuus_M_contig18.4219.1,prot_S-promiscuus_M_contig2.5475.1,prot_S-promiscuus_M_contig29.8683.1,prot_S-promiscuus_M_contig35.10917.1,prot_S-promiscuus_M_contig35.10990.1,prot_S-promiscuus_M_contig42.13290.1,prot_S-promiscuus_M_contig5.14258.1,prot_S-promiscuus_M_contig50.15088.1,prot_S-…	SJ00179,SJ01337,SJ01339,SJ06075,SJ06489,SJ06911,SJ08889,SJ17281	prot_S-latissima_F_contig106.506.1,prot_S-latissima_F_contig1133.1119.1,prot_S-latissima_F_contig2172.6635.1,prot_S-latissima_F_contig2816.8782.1,prot_S-latissima_F_contig62.14004.1	prot_S-rigidula_F_contig1259.4.1,prot_S-rigidula_F_contig16118.1.1,prot_S-rigidula_F_contig16382.1.1,prot_S-rigidula_F_contig16382.2.1,prot_S-rigidula_F_contig1834.4.1,prot_S-rigidula_F_contig2.10.1,prot_S-rigidula_F_contig2.11.1,prot_S-rigidula_F_contig5648.1.1,prot_S-rigidula_F_contig5648.2.1,prot_S-rigidula_F_contig5753.1.1,prot_S-rigidula_F_contig6316.1.1
OG0000025	FALSE	prot_D-dichotoma_M_contig140.2980.1,prot_D-dichotoma_M_contig166.4556.1,prot_D-dichotoma_M_contig248.8519.1,prot_D-dichotoma_M_contig329.11309.1,prot_D-dichotoma_M_contig3642.12249.1,prot_D-dichotoma_M_contig4474.14208.1,prot_D-dichotoma_M_contig991.20545.1	NA	prot_M-pyrifera_M_contig113925.2895.1,prot_M-pyrifera_M_contig20154.7836.1,prot_M-pyrifera_M_contig49302.13116.1,prot_M-pyrifera_M_contig5191.13547.1,prot_M-pyrifera_M_contig652.15867.1	prot_M-clavaeformis_F_contig11521.1408.1,prot_M-clavaeformis_F_contig3638.11526.1,prot_M-clavaeformis_F_contig5351.15285.1	prot_P-littoralis_Contig1130.4.1,prot_P-littoralis_Contig1179.6.1,prot_P-littoralis_Contig1557.1.1	prot_S-polyschides_M_contig104303.393.1,prot_S-polyschides_M_contig1076.682.1,prot_S-polyschides_M_contig1133.1228.1,prot_S-polyschides_M_contig12425.2257.1,prot_S-polyschides_M_contig1899.6080.1,prot_S-polyschides_M_contig2022.6600.1,prot_S-polyschides_M_contig20507.6714.1,prot_S-polyschides_M_contig20574.6748.1,prot_S-polyschides_M_contig22960.7802.1,prot_S-polyschides_M_contig2335.7926.1,prot_…	prot_S-promiscuus_M_contig16.3771.1,prot_S-promiscuus_M_contig44.13494.1,prot_S-promiscuus_M_contig79.17819.1	SJ00266,SJ00267,SJ00523,SJ00529,SJ00533,SJ00549,SJ01367,SJ01892,SJ02209,SJ02324,SJ02543,SJ02590,SJ03794,SJ05059,SJ05261,SJ05387,SJ05918,SJ07852,SJ08275,SJ08512,SJ08567,SJ09146,SJ09148,SJ09181,SJ09302,SJ09304,SJ09532,SJ10516,SJ10767,SJ11768,SJ12762,SJ12957,SJ14039,SJ14892,SJ15242,SJ15672,SJ16206,SJ16865,SJ17884,SJ18051,SJ18499,SJ21124,SJ22142,SJ22323,SJ22581	prot_S-latissima_F_contig196.5731.1,prot_S-latissima_F_contig2614.8183.1,prot_S-latissima_F_contig3711.10652.1,prot_S-latissima_F_contig544.13163.1	prot_S-rigidula_F_contig11514.1.1,prot_S-rigidula_F_contig11594.1.1,prot_S-rigidula_F_contig12263.1.1,prot_S-rigidula_F_contig1288.1.1,prot_S-rigidula_F_contig13398.1.1,prot_S-rigidula_F_contig15040.2.1,prot_S-rigidula_F_contig17014.1.1,prot_S-rigidula_F_contig17585.2.1,prot_S-rigidula_F_contig17910.1.1,prot_S-rigidula_F_contig18485.3.1,prot_S-rigidula_F_contig19258.1.1,prot_S-rigidula_F_contig19…
OG0000026	FALSE	prot_D-dichotoma_M_contig1074.655.1,prot_D-dichotoma_M_contig1126.1067.1,prot_D-dichotoma_M_contig1625.4367.1,prot_D-dichotoma_M_contig1682.4677.1,prot_D-dichotoma_M_contig1726.4916.1,prot_D-dichotoma_M_contig181.5354.1,prot_D-dichotoma_M_contig2146.7084.1,prot_D-dichotoma_M_contig2374.8081.1,prot_D-dichotoma_M_contig298.10291.1,prot_D-dichotoma_M_contig3042.10546.1,prot_D-dichotoma_M_contig3822.…	NA	NA	prot_M-clavaeformis_F_contig10177.237.1,prot_M-clavaeformis_F_contig16166.4417.1,prot_M-clavaeformis_F_contig6436.17044.1,prot_M-clavaeformis_F_contig7006.17935.1,prot_M-clavaeformis_F_contig9482.20790.1	prot_P-littoralis_Contig228.12.1,prot_P-littoralis_Contig382.20.1,prot_P-littoralis_Contig528.36.1	prot_S-polyschides_M_contig14957.3962.1,prot_S-polyschides_M_contig35253.11354.1,prot_S-polyschides_M_contig39202.12170.1,prot_S-polyschides_M_contig60329.15421.1	prot_S-promiscuus_M_contig18.4137.1,prot_S-promiscuus_M_contig25.7350.1	SJ00236,SJ00261,SJ00949,SJ01327,SJ01328,SJ01521,SJ01947,SJ02045,SJ02082,SJ02315,SJ02475,SJ02618,SJ03196,SJ03334,SJ03513,SJ03514,SJ04691,SJ05044,SJ05242,SJ05702,SJ05703,SJ06017,SJ06062,SJ06229,SJ06579,SJ06806,SJ06822,SJ07007,SJ07446,SJ07553,SJ07582,SJ07698,SJ07783,SJ07800,SJ07918,SJ07958,SJ08026,SJ08089,SJ08458,SJ08725,SJ08861,SJ09196,SJ09243,SJ09869,SJ09968,SJ10368,SJ10561,SJ10562,SJ10808,SJ11512…	NA	prot_S-rigidula_F_contig17053.1.1,prot_S-rigidula_F_contig18416.1.1,prot_S-rigidula_F_contig2275.3.1,prot_S-rigidula_F_contig23420.1.1,prot_S-rigidula_F_contig3911.1.1,prot_S-rigidula_F_contig792.8.1
OG0000027	FALSE	prot_D-dichotoma_M_contig1601.4205.1,prot_D-dichotoma_M_contig1692.4721.1,prot_D-dichotoma_M_contig2540.8738.1,prot_D-dichotoma_M_contig274.9456.1,prot_D-dichotoma_M_contig3884.12844.1,prot_D-dichotoma_M_contig4249.13758.1,prot_D-dichotoma_M_contig441.14103.1,prot_D-dichotoma_M_contig4646.14585.1,prot_D-dichotoma_M_contig4646.14586.1,prot_D-dichotoma_M_contig488.15032.1,prot_D-dichotoma_M_contig5…	Ec-02_003860.1,Ec-04_000110.1,Ec-04_000820.1,Ec-10_006420.1,Ec-11_001715.1,Ec-13_000200.1,Ec-21_000180.1,Ec-23_004240.1,Ec-26_000040.1	prot_M-pyrifera_M_contig5746.14529.1	prot_M-clavaeformis_F_contig6028.16428.1	NA	prot_S-polyschides_M_contig11785.1667.1,prot_S-polyschides_M_contig14221.3551.1,prot_S-polyschides_M_contig1641.4830.1,prot_S-polyschides_M_contig2754.9339.1,prot_S-polyschides_M_contig3030.10095.1,prot_S-polyschides_M_contig31176.10309.1,prot_S-polyschides_M_contig3474.11244.1,prot_S-polyschides_M_contig3681.11653.1,prot_S-polyschides_M_contig62368.15710.1,prot_S-polyschides_M_contig6286.15784.1…	prot_S-promiscuus_M_contig1.11.1,prot_S-promiscuus_M_contig12.1835.1,prot_S-promiscuus_M_contig17.3966.1,prot_S-promiscuus_M_contig17.4046.1,prot_S-promiscuus_M_contig20.5797.1,prot_S-promiscuus_M_contig20.5821.1,prot_S-promiscuus_M_contig24.7185.1,prot_S-promiscuus_M_contig26.7696.1,prot_S-promiscuus_M_contig29.8387.1,prot_S-promiscuus_M_contig32.10298.1,prot_S-promiscuus_M_contig39.11777.1,prot…	SJ00184,SJ00492,SJ01542,SJ01543,SJ02087,SJ02482,SJ03032,SJ03033,SJ03317,SJ03318,SJ03361,SJ03365,SJ03507,SJ03536,SJ03540,SJ03541,SJ03553,SJ03558,SJ03575,SJ04419,SJ04612,SJ04869,SJ04870,SJ04943,SJ05086,SJ05340,SJ05341,SJ05630,SJ05700,SJ05751,SJ05752,SJ07150,SJ07336,SJ07843,SJ08445,SJ09259,SJ09563,SJ09627,SJ10398,SJ11248,SJ15861,SJ15945,SJ18931,SJ18933,SJ19134,SJ19247,SJ20127,SJ20130,SJ20408,SJ20955…	prot_S-latissima_F_contig166.4396.1,prot_S-latissima_F_contig24.7508.1,prot_S-latissima_F_contig742.15284.1,prot_S-latissima_F_contig806.15924.1	prot_S-rigidula_F_contig7322.1.1,prot_S-rigidula_F_contig7685.1.1
OG0000028	FALSE	prot_D-dichotoma_M_contig2063.6625.1	Ec-00_005000.1,Ec-00_005810.1,Ec-00_006840.1,Ec-03_001950.1,Ec-05_000570.1,Ec-05_001640.1,Ec-07_007640.1,Ec-07_007650.1,Ec-11_003490.1,Ec-14_000450.1,Ec-16_004230.1,Ec-20_004840.1,Ec-22_001420.1,Ec-23_002420.1	prot_M-pyrifera_M_contig201.7823.1,prot_M-pyrifera_M_contig23961.8693.1,prot_M-pyrifera_M_contig68387.16456.1,prot_M-pyrifera_M_contig75624.17838.1,prot_M-pyrifera_M_contig7885.18525.1	prot_M-clavaeformis_F_contig1685.4785.1,prot_M-clavaeformis_F_contig2285.7357.1,prot_M-clavaeformis_F_contig2835.9290.1,prot_M-clavaeformis_F_contig2835.9291.1,prot_M-clavaeformis_F_contig375.11837.1,prot_M-clavaeformis_F_contig578.15973.1,prot_M-clavaeformis_F_contig7291.18326.1	prot_P-littoralis_Contig147.52.1,prot_P-littoralis_Contig147.54.1,prot_P-littoralis_Contig171.1.3,prot_P-littoralis_Contig182.42.1,prot_P-littoralis_Contig182.43.1,prot_P-littoralis_Contig182.44.1,prot_P-littoralis_Contig195.93.1,prot_P-littoralis_Contig23.11.1,prot_P-littoralis_Contig23.12.1,prot_P-littoralis_Contig341.55.1,prot_P-littoralis_Contig341.56.1,prot_P-littoralis_Contig4.114.1,prot_P-…	prot_S-polyschides_M_contig10534.483.1,prot_S-polyschides_M_contig10665.591.1,prot_S-polyschides_M_contig10956.844.1,prot_S-polyschides_M_contig116658.1569.1,prot_S-polyschides_M_contig12579.2363.1,prot_S-polyschides_M_contig14470.3709.1,prot_S-polyschides_M_contig15023.4001.1,prot_S-polyschides_M_contig1667.4966.1,prot_S-polyschides_M_contig20902.6891.1,prot_S-polyschides_M_contig2210.7473.1,pro…	prot_S-promiscuus_M_contig12.2018.1,prot_S-promiscuus_M_contig12.2032.1,prot_S-promiscuus_M_contig38.11628.1,prot_S-promiscuus_M_contig84.18566.1,prot_S-promiscuus_M_contig84.18567.1	SJ00268,SJ00476,SJ00477,SJ02939,SJ03921,SJ04180,SJ05871,SJ14467,SJ18720,SJ20262,SJ20263,SJ20264	prot_S-latissima_F_contig2435.7628.1,prot_S-latissima_F_contig2435.7629.1,prot_S-latissima_F_contig2435.7630.1,prot_S-latissima_F_contig3145.9592.1,prot_S-latissima_F_contig41.11280.1	prot_S-rigidula_F_contig1399.1.2,prot_S-rigidula_F_contig16761.1.1,prot_S-rigidula_F_contig17641.1.1,prot_S-rigidula_F_contig1996.1.1,prot_S-rigidula_F_contig20206.2.1,prot_S-rigidula_F_contig26638.1.1,prot_S-rigidula_F_contig286.1.1,prot_S-rigidula_F_contig3596.1.1,prot_S-rigidula_F_contig6324.1.1,prot_S-rigidula_F_contig6528.5.1
OG0000029	FALSE	prot_D-dichotoma_M_contig1347.2621.1,prot_D-dichotoma_M_contig1408.3021.1,prot_D-dichotoma_M_contig174.4980.1,prot_D-dichotoma_M_contig2537.8728.1,prot_D-dichotoma_M_contig2548.8761.1,prot_D-dichotoma_M_contig2548.8762.1,prot_D-dichotoma_M_contig3682.12338.1,prot_D-dichotoma_M_contig3682.12339.1,prot_D-dichotoma_M_contig3682.12343.1,prot_D-dichotoma_M_contig3682.12344.1,prot_D-dichotoma_M_contig4…	Ec-08_003350.1,Ec-13_003560.1,Ec-15_001180.1,Ec-15_001920.1,Ec-15_004740.1,Ec-23_002730.1,Ec-25_003480.1,Ec-28_003150.1	prot_M-pyrifera_M_contig1040.855.1,prot_M-pyrifera_M_contig1867.7466.1,prot_M-pyrifera_M_contig19061.7571.1,prot_M-pyrifera_M_contig2445.8813.1,prot_M-pyrifera_M_contig2445.8814.1,prot_M-pyrifera_M_contig63906.15638.1,prot_M-pyrifera_M_contig70225.16784.1	prot_M-clavaeformis_F_contig1519.3838.1,prot_M-clavaeformis_F_contig157.4141.1,prot_M-clavaeformis_F_contig1879.5711.1,prot_M-clavaeformis_F_contig2566.8379.1,prot_M-clavaeformis_F_contig2733.8977.1,prot_M-clavaeformis_F_contig2994.9745.1,prot_M-clavaeformis_F_contig2994.9746.1,prot_M-clavaeformis_F_contig3237.10485.1,prot_M-clavaeformis_F_contig3237.10486.1,prot_M-clavaeformis_F_contig3247.10504…	prot_P-littoralis_Contig106.20.1,prot_P-littoralis_Contig106.21.1,prot_P-littoralis_Contig1323.7.1,prot_P-littoralis_Contig1372.3.1,prot_P-littoralis_Contig301.4.2,prot_P-littoralis_Contig435.47.1,prot_P-littoralis_Contig509.11.1,prot_P-littoralis_Contig509.13.1,prot_P-littoralis_Contig509.29.1,prot_P-littoralis_Contig575.28.1,prot_P-littoralis_Contig612.28.2,prot_P-littoralis_Contig645.2.1,prot_…	prot_S-polyschides_M_contig13087.2767.1,prot_S-polyschides_M_contig20519.6722.1,prot_S-polyschides_M_contig2358.8023.1,prot_S-polyschides_M_contig35674.11435.1,prot_S-polyschides_M_contig4410.13067.1,prot_S-polyschides_M_contig5708.14986.1,prot_S-polyschides_M_contig6040.15430.1,prot_S-polyschides_M_contig6053.15443.1,prot_S-polyschides_M_contig715.16822.1	prot_S-promiscuus_M_contig5.14444.1,prot_S-promiscuus_M_contig50.15091.1,prot_S-promiscuus_M_contig50.15092.1,prot_S-promiscuus_M_contig7.17064.1	SJ00614,SJ01333,SJ08888,SJ15706,SJ16129,SJ17279	prot_S-latissima_F_contig1181.1438.1,prot_S-latissima_F_contig1181.1439.1,prot_S-latissima_F_contig1181.1440.1,prot_S-latissima_F_contig2172.6634.1,prot_S-latissima_F_contig281.8753.1,prot_S-latissima_F_contig3538.10360.1,prot_S-latissima_F_contig3764.10714.1,prot_S-latissima_F_contig3764.10715.1,prot_S-latissima_F_contig482.12321.1,prot_S-latissima_F_contig482.12322.1	prot_S-rigidula_F_contig13891.1.1,prot_S-rigidula_F_contig17195.2.1,prot_S-rigidula_F_contig26879.2.1,prot_S-rigidula_F_contig26985.1.1,prot_S-rigidula_F_contig4940.2.5,prot_S-rigidula_F_contig5427.1.1,prot_S-rigidula_F_contig7387.1.1,prot_S-rigidula_F_contig7552.1.1,prot_S-rigidula_F_contig7552.2.1
OG0000030	FALSE	prot_D-dichotoma_M_contig1162.1350.1,prot_D-dichotoma_M_contig1366.2725.1,prot_D-dichotoma_M_contig15.3577.1,prot_D-dichotoma_M_contig1562.3936.1,prot_D-dichotoma_M_contig1573.4000.1,prot_D-dichotoma_M_contig1650.4507.1,prot_D-dichotoma_M_contig1756.5065.1,prot_D-dichotoma_M_contig2073.6675.1,prot_D-dichotoma_M_contig2100.6870.1,prot_D-dichotoma_M_contig2108.6897.1,prot_D-dichotoma_M_contig2131.7…	NA	prot_M-pyrifera_M_contig37448.11290.1	prot_M-clavaeformis_F_contig4070.12633.1,prot_M-clavaeformis_F_contig4816.14216.1,prot_M-clavaeformis_F_contig6327.16878.1	prot_P-littoralis_Contig1010.10.1,prot_P-littoralis_Contig103.95.2,prot_P-littoralis_Contig1030.25.1,prot_P-littoralis_Contig1032.11.1,prot_P-littoralis_Contig1069.2.1,prot_P-littoralis_Contig1097.7.1,prot_P-littoralis_Contig1124.9.1,prot_P-littoralis_Contig115.79.1,prot_P-littoralis_Contig1193.5.1,prot_P-littoralis_Contig120.6.1,prot_P-littoralis_Contig1201.1.1,prot_P-littoralis_Contig1201.7.1,p…	prot_S-polyschides_M_contig29105.9759.1,prot_S-polyschides_M_contig6930.16571.1	prot_S-promiscuus_M_contig44.13542.1,prot_S-promiscuus_M_contig49.14254.1,prot_S-promiscuus_M_contig87.18600.1,prot_S-promiscuus_M_contig9.18728.1	SJ06962,SJ12251,SJ12691,SJ14880,SJ22169	prot_S-latissima_F_contig1343.2553.1,prot_S-latissima_F_contig201.6036.1,prot_S-latissima_F_contig384.10852.1,prot_S-latissima_F_contig612.13956.1,prot_S-latissima_F_contig743.15286.1	prot_S-rigidula_F_contig7865.1.1
OG0000031	FALSE	prot_D-dichotoma_M_contig1121.1045.1,prot_D-dichotoma_M_contig1468.3391.1,prot_D-dichotoma_M_contig1803.5319.1,prot_D-dichotoma_M_contig1830.5430.1,prot_D-dichotoma_M_contig1901.5778.1,prot_D-dichotoma_M_contig2220.7417.1,prot_D-dichotoma_M_contig2220.7420.1,prot_D-dichotoma_M_contig3162.10931.1,prot_D-dichotoma_M_contig3604.12153.1,prot_D-dichotoma_M_contig4271.13812.1,prot_D-dichotoma_M_contig4…	Ec-19_002200.1	prot_M-pyrifera_M_contig14499.6278.1,prot_M-pyrifera_M_contig196.7708.1,prot_M-pyrifera_M_contig4077.11811.1	prot_M-clavaeformis_F_contig14615.3472.1	prot_P-littoralis_Contig174.4.1	prot_S-polyschides_M_contig4437.13110.1,prot_S-polyschides_M_contig922.19022.1	prot_S-promiscuus_M_contig15.3215.1,prot_S-promiscuus_M_contig18.4284.1,prot_S-promiscuus_M_contig66.16892.1,prot_S-promiscuus_M_contig66.16894.1,prot_S-promiscuus_M_contig66.16896.1,prot_S-promiscuus_M_contig66.16897.1,prot_S-promiscuus_M_contig72.17649.1,prot_S-promiscuus_M_contig72.17650.1,prot_S-promiscuus_M_contig72.17652.1,prot_S-promiscuus_M_contig72.17653.1,prot_S-promiscuus_M_contig72.17…	SJ01048,SJ01470,SJ02017,SJ02018,SJ02020,SJ02021,SJ02022,SJ02023,SJ02025,SJ05548,SJ07395,SJ07567,SJ07568,SJ13045,SJ13630,SJ14974,SJ14975,SJ15024,SJ15025,SJ15566,SJ15567,SJ15568,SJ15570,SJ15571,SJ15572,SJ15573,SJ15574,SJ15576,SJ15577,SJ15578,SJ15579,SJ15580,SJ15582,SJ15583,SJ15584,SJ15585,SJ15587,SJ15588,SJ15589,SJ15590,SJ15591,SJ15592,SJ18040,SJ18041,SJ21221,SJ22004	prot_S-latissima_F_contig129.2178.1,prot_S-latissima_F_contig129.2179.1,prot_S-latissima_F_contig129.2180.1,prot_S-latissima_F_contig129.2181.1,prot_S-latissima_F_contig129.2182.1,prot_S-latissima_F_contig163.4243.1,prot_S-latissima_F_contig163.4244.1,prot_S-latissima_F_contig163.4245.1,prot_S-latissima_F_contig163.4246.1,prot_S-latissima_F_contig163.4247.1,prot_S-latissima_F_contig163.4249.1,pro…	prot_S-rigidula_F_contig14614.1.1,prot_S-rigidula_F_contig4955.1.1,prot_S-rigidula_F_contig5465.4.1
OG0000032	FALSE	prot_D-dichotoma_M_contig1942.5990.1,prot_D-dichotoma_M_contig2115.6933.1,prot_D-dichotoma_M_contig2115.6935.1,prot_D-dichotoma_M_contig2859.9851.1,prot_D-dichotoma_M_contig4557.14409.1,prot_D-dichotoma_M_contig4660.14606.1,prot_D-dichotoma_M_contig525.15746.1,prot_D-dichotoma_M_contig965.20357.1,prot_D-dichotoma_M_contig965.20358.1,prot_D-dichotoma_M_contig994.20554.1,prot_D-dichotoma_M_contig99…	Ec-28_003320.1	prot_M-pyrifera_M_contig1014.293.1,prot_M-pyrifera_M_contig1036.760.1,prot_M-pyrifera_M_contig1036.761.1,prot_M-pyrifera_M_contig12950.5795.1,prot_M-pyrifera_M_contig1587.6687.1,prot_M-pyrifera_M_contig2493.8920.1,prot_M-pyrifera_M_contig46036.12592.1,prot_M-pyrifera_M_contig5597.14239.1,prot_M-pyrifera_M_contig58018.14621.1,prot_M-pyrifera_M_contig80083.18777.1,prot_M-pyrifera_M_contig860.20044.…	prot_M-clavaeformis_F_contig1464.3493.1,prot_M-clavaeformis_F_contig3667.11610.1,prot_M-clavaeformis_F_contig4954.14508.1,prot_M-clavaeformis_F_contig8497.19760.1	prot_P-littoralis_Contig69.32.3	prot_S-polyschides_M_contig1039.355.1,prot_S-polyschides_M_contig352.11338.1	prot_S-promiscuus_M_contig7.17100.1,prot_S-promiscuus_M_contig88.18607.1,prot_S-promiscuus_M_contig88.18610.1	SJ00628,SJ00634,SJ00798,SJ00799,SJ00800,SJ01273,SJ01275,SJ01276,SJ01763,SJ01764,SJ01766,SJ01768,SJ01769,SJ01770,SJ01771,SJ02167,SJ02174,SJ02175,SJ02199,SJ02202,SJ02868,SJ02870,SJ02871,SJ03821,SJ03822,SJ07391,SJ07392,SJ07393,SJ07437,SJ08422,SJ09653,SJ09965,SJ10789,SJ10798,SJ10801,SJ12371,SJ12372,SJ12373,SJ12377,SJ12378,SJ12783,SJ14652,SJ15629,SJ15632,SJ15635,SJ15639,SJ17646,SJ18113,SJ19766,SJ19768…	prot_S-latissima_F_contig1127.1056.1,prot_S-latissima_F_contig1127.1057.1,prot_S-latissima_F_contig1127.1058.1,prot_S-latissima_F_contig1127.1059.1,prot_S-latissima_F_contig1406.2983.1,prot_S-latissima_F_contig1406.2984.1,prot_S-latissima_F_contig1482.3464.1,prot_S-latissima_F_contig202.6074.1,prot_S-latissima_F_contig202.6076.1,prot_S-latissima_F_contig2204.6792.1,prot_S-latissima_F_contig357.10…	prot_S-rigidula_F_contig19324.1.1,prot_S-rigidula_F_contig20236.1.1
OG0000033	FALSE	prot_D-dichotoma_M_contig1460.3360.1,prot_D-dichotoma_M_contig1833.5436.1,prot_D-dichotoma_M_contig1890.5712.1,prot_D-dichotoma_M_contig2083.6774.1,prot_D-dichotoma_M_contig2632.9072.1,prot_D-dichotoma_M_contig397.13040.1,prot_D-dichotoma_M_contig618.17067.1,prot_D-dichotoma_M_contig94.20139.1,prot_D-dichotoma_M_contig990.20536.1	Ec-15_004830.1	prot_M-pyrifera_M_contig108227.1755.1,prot_M-pyrifera_M_contig121311.4389.1,prot_M-pyrifera_M_contig13562.5999.1,prot_M-pyrifera_M_contig18875.7524.1,prot_M-pyrifera_M_contig40941.11839.1,prot_M-pyrifera_M_contig71514.17049.1	prot_M-clavaeformis_F_contig5668.15788.1,prot_M-clavaeformis_F_contig5986.16318.1	prot_P-littoralis_Contig1158.1.1,prot_P-littoralis_Contig1195.1.1,prot_P-littoralis_Contig129.96.1,prot_P-littoralis_Contig13.138.1,prot_P-littoralis_Contig14.127.1,prot_P-littoralis_Contig145.92.1,prot_P-littoralis_Contig1532.8.1,prot_P-littoralis_Contig161.65.1,prot_P-littoralis_Contig162.71.1,prot_P-littoralis_Contig166.64.1,prot_P-littoralis_Contig17.42.1,prot_P-littoralis_Contig2.128.1,prot_…	prot_S-polyschides_M_contig11392.1296.1,prot_S-polyschides_M_contig13401.2979.1,prot_S-polyschides_M_contig1587.4514.1,prot_S-polyschides_M_contig16393.4820.1,prot_S-polyschides_M_contig19261.6191.1,prot_S-polyschides_M_contig24457.8341.1,prot_S-polyschides_M_contig2786.9437.1,prot_S-polyschides_M_contig3210.10550.1,prot_S-polyschides_M_contig37376.11777.1,prot_S-polyschides_M_contig45582.13310.1…	prot_S-promiscuus_M_contig1.275.1,prot_S-promiscuus_M_contig11.1413.1	SJ00181,SJ01191,SJ02864,SJ02865,SJ11662,SJ11663	prot_S-latissima_F_contig2073.6269.1,prot_S-latissima_F_contig97.17446.1	prot_S-rigidula_F_contig11012.1.1,prot_S-rigidula_F_contig14895.5.1,prot_S-rigidula_F_contig17769.2.1,prot_S-rigidula_F_contig17800.1.1,prot_S-rigidula_F_contig18557.1.1,prot_S-rigidula_F_contig19352.1.1,prot_S-rigidula_F_contig21061.1.1,prot_S-rigidula_F_contig23518.1.2,prot_S-rigidula_F_contig23757.1.1,prot_S-rigidula_F_contig4062.1.1,prot_S-rigidula_F_contig4979.1.1
OG0000034	FALSE	prot_D-dichotoma_M_contig1651.4509.1,prot_D-dichotoma_M_contig2474.8489.1,prot_D-dichotoma_M_contig2695.9287.1,prot_D-dichotoma_M_contig3311.11390.1,prot_D-dichotoma_M_contig3628.12206.1,prot_D-dichotoma_M_contig3740.12501.1,prot_D-dichotoma_M_contig3895.12861.1,prot_D-dichotoma_M_contig3895.12862.1,prot_D-dichotoma_M_contig5040.15393.1,prot_D-dichotoma_M_contig5158.15585.1	Ec-00_000870.1,Ec-03_000500.1,Ec-03_000520.1,Ec-08_000100.1,Ec-08_000110.1,Ec-08_006060.1,Ec-09_001420.1,Ec-10_003790.1,Ec-13_003120.1,Ec-13_004330.1,Ec-15_000200.1,Ec-21_000940.1,Ec-21_000950.1,Ec-22_001500.1,Ec-22_001535.1,Ec-22_003120.1,Ec-22_003155.1,Ec-22_003160.1,Ec-22_003170.1,Ec-22_003210.1,Ec-23_002620.1,Ec-24_004350.1,Ec-25_003490.1	prot_M-pyrifera_M_contig11237.2584.1,prot_M-pyrifera_M_contig2812.9568.1,prot_M-pyrifera_M_contig29024.9754.1,prot_M-pyrifera_M_contig44275.12338.1,prot_M-pyrifera_M_contig562.14292.1,prot_M-pyrifera_M_contig9794.22557.1,prot_M-pyrifera_M_contig9794.22558.1	prot_M-clavaeformis_F_contig2155.6893.1,prot_M-clavaeformis_F_contig2518.8218.1,prot_M-clavaeformis_F_contig3817.12018.1,prot_M-clavaeformis_F_contig5409.15391.1,prot_M-clavaeformis_F_contig556.15624.1	prot_P-littoralis_Contig295.30.11,prot_P-littoralis_Contig296.38.1	prot_S-polyschides_M_contig108252.740.1,prot_S-polyschides_M_contig15471.4278.1,prot_S-polyschides_M_contig18491.5872.1,prot_S-polyschides_M_contig22634.7679.1,prot_S-polyschides_M_contig31096.10280.1,prot_S-polyschides_M_contig6781.16390.1,prot_S-polyschides_M_contig8745.18501.1	prot_S-promiscuus_M_contig37.11368.1	SJ05124,SJ09402,SJ09408,SJ09409,SJ09412,SJ13061	prot_S-latissima_F_contig1.6.1,prot_S-latissima_F_contig19.5473.1,prot_S-latissima_F_contig30.9253.1,prot_S-latissima_F_contig447.11866.1,prot_S-latissima_F_contig543.13153.1,prot_S-latissima_F_contig543.13158.1,prot_S-latissima_F_contig76.15447.1,prot_S-latissima_F_contig76.15449.1	prot_S-rigidula_F_contig10207.1.1,prot_S-rigidula_F_contig10389.1.1,prot_S-rigidula_F_contig12145.1.1,prot_S-rigidula_F_contig12260.1.1,prot_S-rigidula_F_contig12652.1.1,prot_S-rigidula_F_contig12718.1.1,prot_S-rigidula_F_contig12909.1.1,prot_S-rigidula_F_contig13148.1.1,prot_S-rigidula_F_contig13514.2.1,prot_S-rigidula_F_contig13514.3.1,prot_S-rigidula_F_contig14225.1.2,prot_S-rigidula_F_contig1…
OG0000035	FALSE	prot_D-dichotoma_M_contig1019.253.1,prot_D-dichotoma_M_contig1117.991.1,prot_D-dichotoma_M_contig1145.1205.1,prot_D-dichotoma_M_contig1267.2064.1,prot_D-dichotoma_M_contig1444.3257.1,prot_D-dichotoma_M_contig15.3588.1,prot_D-dichotoma_M_contig1501.3605.1,prot_D-dichotoma_M_contig1672.4628.1,prot_D-dichotoma_M_contig1934.5950.1,prot_D-dichotoma_M_contig1971.6113.1,prot_D-dichotoma_M_contig2100.687…	Ec-00_009390.1,Ec-06_008720.1,Ec-09_004230.1,Ec-09_004260.1,Ec-09_004570.1,Ec-14_000190.1,Ec-14_000210.1,Ec-20_001980.1,Ec-20_002700.1,Ec-21_001490.1,Ec-21_003140.1,Ec-21_003160.1,Ec-25_002430.1	prot_M-pyrifera_M_contig2298.8487.1,prot_M-pyrifera_M_contig2298.8488.1,prot_M-pyrifera_M_contig240.8702.1,prot_M-pyrifera_M_contig3471.10816.1,prot_M-pyrifera_M_contig36552.11142.1,prot_M-pyrifera_M_contig713.17004.1,prot_M-pyrifera_M_contig8090.18921.1	prot_M-clavaeformis_F_contig1056.570.1,prot_M-clavaeformis_F_contig142.3223.1,prot_M-clavaeformis_F_contig14814.3604.1,prot_M-clavaeformis_F_contig1604.4357.1,prot_M-clavaeformis_F_contig1729.5022.1,prot_M-clavaeformis_F_contig2078.6580.1,prot_M-clavaeformis_F_contig23.7403.1,prot_M-clavaeformis_F_contig2396.7764.1,prot_M-clavaeformis_F_contig2722.8938.1,prot_M-clavaeformis_F_contig3804.11982.1,p…	prot_P-littoralis_Contig1265.7.1,prot_P-littoralis_Contig980.10.2	prot_S-polyschides_M_contig10012.10.1,prot_S-polyschides_M_contig14309.3616.1,prot_S-polyschides_M_contig193.6206.1,prot_S-polyschides_M_contig220.7429.1,prot_S-polyschides_M_contig224.7574.1,prot_S-polyschides_M_contig2257.7647.1,prot_S-polyschides_M_contig239.8147.1,prot_S-polyschides_M_contig3453.11182.1,prot_S-polyschides_M_contig4854.13797.1,prot_S-polyschides_M_contig7415.17113.1,prot_S-pol…	prot_S-promiscuus_M_contig13.2168.1,prot_S-promiscuus_M_contig13.2169.1,prot_S-promiscuus_M_contig34.10634.1,prot_S-promiscuus_M_contig34.10660.1,prot_S-promiscuus_M_contig34.10662.1,prot_S-promiscuus_M_contig34.10663.1,prot_S-promiscuus_M_contig34.10667.1,prot_S-promiscuus_M_contig4.12706.1,prot_S-promiscuus_M_contig4.12707.1,prot_S-promiscuus_M_contig4.12710.1	SJ01869,SJ03015,SJ04867,SJ06656,SJ06665,SJ07017,SJ07018,SJ07081,SJ08240,SJ16049,SJ18398,SJ18399,SJ18404,SJ19784,SJ20812	prot_S-latissima_F_contig1771.4915.1,prot_S-latissima_F_contig1930.5632.1,prot_S-latissima_F_contig1975.5805.1,prot_S-latissima_F_contig240.7540.1,prot_S-latissima_F_contig47.12220.1,prot_S-latissima_F_contig581.13579.1,prot_S-latissima_F_contig978.17509.1	prot_S-rigidula_F_contig14432.1.1,prot_S-rigidula_F_contig50.1.2,prot_S-rigidula_F_contig5071.2.7
OG0000036	FALSE	prot_D-dichotoma_M_contig1241.1912.1,prot_D-dichotoma_M_contig1344.2607.1,prot_D-dichotoma_M_contig1356.2672.1,prot_D-dichotoma_M_contig1446.3263.1,prot_D-dichotoma_M_contig1620.4344.1,prot_D-dichotoma_M_contig1640.4460.1,prot_D-dichotoma_M_contig1642.4469.1,prot_D-dichotoma_M_contig1649.4494.1,prot_D-dichotoma_M_contig1649.4495.1,prot_D-dichotoma_M_contig1778.5155.1,prot_D-dichotoma_M_contig1863…	Ec-00_007610.1,Ec-01_001760.1,Ec-01_001800.1,Ec-03_000700.1,Ec-03_000710.1,Ec-03_000720.1,Ec-03_000770.1,Ec-03_000780.1,Ec-03_001790.1,Ec-06_001640.1,Ec-12_003110.1,Ec-15_004730.1,Ec-15_004840.1,Ec-15_004850.1,Ec-17_002300.1,Ec-19_000130.1,Ec-19_000270.1,Ec-19_000290.1,Ec-23_004280.1	prot_M-pyrifera_M_contig711.16961.1	prot_M-clavaeformis_F_contig1165.1498.1,prot_M-clavaeformis_F_contig1171.1546.1,prot_M-clavaeformis_F_contig1409.3151.1,prot_M-clavaeformis_F_contig170.4879.1,prot_M-clavaeformis_F_contig1940.5963.1,prot_M-clavaeformis_F_contig2249.7225.1,prot_M-clavaeformis_F_contig2495.8123.1,prot_M-clavaeformis_F_contig2666.8741.1,prot_M-clavaeformis_F_contig3829.12045.1,prot_M-clavaeformis_F_contig395.12323.1…	prot_P-littoralis_Contig1248.1.91,prot_P-littoralis_Contig366.23.2,prot_P-littoralis_Contig416.70.5	prot_S-polyschides_M_contig3357.10909.1,prot_S-polyschides_M_contig63423.15850.1,prot_S-polyschides_M_contig7976.17673.1,prot_S-polyschides_M_contig87631.18512.1	prot_S-promiscuus_M_contig11.1455.1,prot_S-promiscuus_M_contig14.2767.1,prot_S-promiscuus_M_contig14.2994.1,prot_S-promiscuus_M_contig14.3034.1,prot_S-promiscuus_M_contig17.3968.1,prot_S-promiscuus_M_contig18.4103.1,prot_S-promiscuus_M_contig19.4629.1,prot_S-promiscuus_M_contig37.11504.1,prot_S-promiscuus_M_contig37.11506.1,prot_S-promiscuus_M_contig39.11974.1,prot_S-promiscuus_M_contig39.11976.1…	SJ01121,SJ03551,SJ03552,SJ03714,SJ20387,SJ22512	prot_S-latissima_F_contig2570.8056.1,prot_S-latissima_F_contig3027.9326.1,prot_S-latissima_F_contig3141.9588.1,prot_S-latissima_F_contig3141.9589.1,prot_S-latissima_F_contig358.10425.1,prot_S-latissima_F_contig578.13555.1,prot_S-latissima_F_contig842.16311.1	prot_S-rigidula_F_contig730.3.2
OG0000037	FALSE	prot_D-dichotoma_M_contig1095.820.1,prot_D-dichotoma_M_contig1108.936.1,prot_D-dichotoma_M_contig1673.4633.1,prot_D-dichotoma_M_contig275.9478.1,prot_D-dichotoma_M_contig2818.9735.1,prot_D-dichotoma_M_contig3170.10945.1,prot_D-dichotoma_M_contig528.15789.1,prot_D-dichotoma_M_contig97.20381.1	Ec-02_001850.1,Ec-03_000140.1,Ec-05_003570.1,Ec-09_000970.1,Ec-13_004630.1,Ec-14_002550.1,Ec-15_003230.1,Ec-15_004720.1,Ec-20_003730.1,Ec-22_003010.1	prot_M-pyrifera_M_contig116026.3331.1,prot_M-pyrifera_M_contig127325.5503.1,prot_M-pyrifera_M_contig30621.10077.1	prot_M-clavaeformis_F_contig10967.932.1,prot_M-clavaeformis_F_contig129.2381.1,prot_M-clavaeformis_F_contig1632.4504.1,prot_M-clavaeformis_F_contig196.6032.1,prot_M-clavaeformis_F_contig2093.6637.1,prot_M-clavaeformis_F_contig2614.8562.1,prot_M-clavaeformis_F_contig3273.10576.1,prot_M-clavaeformis_F_contig3878.12156.1,prot_M-clavaeformis_F_contig4094.12675.1,prot_M-clavaeformis_F_contig4280.13085…	prot_P-littoralis_Contig1039.20.5,prot_P-littoralis_Contig1083.9.1,prot_P-littoralis_Contig1091.9.1,prot_P-littoralis_Contig1114.4.1,prot_P-littoralis_Contig1121.5.4,prot_P-littoralis_Contig1135.3.2,prot_P-littoralis_Contig132.53.1,prot_P-littoralis_Contig1410.2.1,prot_P-littoralis_Contig1452.1.1,prot_P-littoralis_Contig263.100.1,prot_P-littoralis_Contig307.88.2,prot_P-littoralis_Contig340.87.2,p…	prot_S-polyschides_M_contig115386.1436.1,prot_S-polyschides_M_contig116477.1551.1,prot_S-polyschides_M_contig132707.2884.1,prot_S-polyschides_M_contig13411.2987.1,prot_S-polyschides_M_contig18970.6073.1,prot_S-polyschides_M_contig27379.9285.1,prot_S-polyschides_M_contig6991.16639.1,prot_S-polyschides_M_contig83844.18099.1,prot_S-polyschides_M_contig9631.19424.1	prot_S-promiscuus_M_contig14.2995.1,prot_S-promiscuus_M_contig16.3536.1,prot_S-promiscuus_M_contig17.3890.1,prot_S-promiscuus_M_contig17.3967.1,prot_S-promiscuus_M_contig35.10953.1,prot_S-promiscuus_M_contig38.11626.1,prot_S-promiscuus_M_contig39.11882.1,prot_S-promiscuus_M_contig39.11972.1,prot_S-promiscuus_M_contig4.12274.1,prot_S-promiscuus_M_contig46.13782.1,prot_S-promiscuus_M_contig9.18939.1	SJ08477,SJ10853	prot_S-latissima_F_contig1297.2223.1,prot_S-latissima_F_contig2073.6270.1,prot_S-latissima_F_contig210.6379.1,prot_S-latissima_F_contig2290.7086.1,prot_S-latissima_F_contig2570.8058.1,prot_S-latissima_F_contig93.17062.1	prot_S-rigidula_F_contig10592.2.1,prot_S-rigidula_F_contig10616.1.1,prot_S-rigidula_F_contig13139.1.1,prot_S-rigidula_F_contig1395.1.1,prot_S-rigidula_F_contig1839.1.1,prot_S-rigidula_F_contig20716.1.6,prot_S-rigidula_F_contig25001.1.1,prot_S-rigidula_F_contig2792.1.1,prot_S-rigidula_F_contig327.1.1,prot_S-rigidula_F_contig8429.1.1
OG0000038	FALSE	prot_D-dichotoma_M_contig1940.5983.1,prot_D-dichotoma_M_contig2953.10205.1,prot_D-dichotoma_M_contig3817.12670.1,prot_D-dichotoma_M_contig488.15033.1,prot_D-dichotoma_M_contig526.15761.1,prot_D-dichotoma_M_contig734.18198.1,prot_D-dichotoma_M_contig734.18200.1	Ec-05_002340.1,Ec-05_002350.1,Ec-08_004090.1,Ec-08_006050.1,Ec-08_006240.1,Ec-08_006250.1,Ec-08_006260.1,Ec-08_006270.1,Ec-08_006280.1,Ec-08_006290.1,Ec-08_006300.1,Ec-12_002770.1,Ec-12_002830.1,Ec-19_000080.1,Ec-19_000090.1,Ec-21_002290.1,Ec-27_001150.1,Ec-27_001160.1	prot_M-pyrifera_M_contig2181.8227.1,prot_M-pyrifera_M_contig402.11724.1,prot_M-pyrifera_M_contig431.12162.1,prot_M-pyrifera_M_contig99324.22852.1	prot_M-clavaeformis_F_contig1071.704.1,prot_M-clavaeformis_F_contig1140.1315.1,prot_M-clavaeformis_F_contig1202.1786.1,prot_M-clavaeformis_F_contig1496.3682.1,prot_M-clavaeformis_F_contig1783.5270.1,prot_M-clavaeformis_F_contig267.8752.1,prot_M-clavaeformis_F_contig267.8754.1,prot_M-clavaeformis_F_contig4361.13266.1,prot_M-clavaeformis_F_contig4365.13274.1,prot_M-clavaeformis_F_contig5750.15930.1…	prot_P-littoralis_Contig1111.4.10,prot_P-littoralis_Contig121.115.1,prot_P-littoralis_Contig129.108.2,prot_P-littoralis_Contig239.28.1,prot_P-littoralis_Contig708.5.6	prot_S-polyschides_M_contig2244.7594.1,prot_S-polyschides_M_contig23492.7985.1,prot_S-polyschides_M_contig277.9382.1,prot_S-polyschides_M_contig3106.10272.1,prot_S-polyschides_M_contig3342.10878.1,prot_S-polyschides_M_contig34665.11228.1,prot_S-polyschides_M_contig34665.11229.1,prot_S-polyschides_M_contig4071.12476.1,prot_S-polyschides_M_contig4264.12826.1,prot_S-polyschides_M_contig5728.15023.1,…	prot_S-promiscuus_M_contig1.601.1,prot_S-promiscuus_M_contig1.607.1,prot_S-promiscuus_M_contig12.2096.1,prot_S-promiscuus_M_contig12.2098.1,prot_S-promiscuus_M_contig12.2099.1,prot_S-promiscuus_M_contig21.6041.1,prot_S-promiscuus_M_contig21.6042.1,prot_S-promiscuus_M_contig5.14704.1,prot_S-promiscuus_M_contig64.16839.1,prot_S-promiscuus_M_contig64.16840.1	SJ01078,SJ03549,SJ05226,SJ06072,SJ06073,SJ06281,SJ07061,SJ07576,SJ07577,SJ07578,SJ07579,SJ07834,SJ07837,SJ07963,SJ07964,SJ11680,SJ17049,SJ20147,SJ20148,SJ22111	prot_S-latissima_F_contig1120.1006.1,prot_S-latissima_F_contig116.1276.1,prot_S-latissima_F_contig116.1279.1,prot_S-latissima_F_contig116.1280.1,prot_S-latissima_F_contig1222.1733.1,prot_S-latissima_F_contig1412.3021.1,prot_S-latissima_F_contig1412.3022.1,prot_S-latissima_F_contig1559.3863.1,prot_S-latissima_F_contig1559.3864.1,prot_S-latissima_F_contig1856.5289.1,prot_S-latissima_F_contig186.531…	NA
OG0000039	FALSE	NA	Ec-00_005980.1,Ec-05_000050.1,Ec-08_002920.1,Ec-11_002120.1,Ec-12_008800.1,Ec-13_000070.1	prot_M-pyrifera_M_contig42221.12036.1,prot_M-pyrifera_M_contig92950.21491.1	prot_M-clavaeformis_F_contig222.7130.1	prot_P-littoralis_Contig1033.32.1,prot_P-littoralis_Contig1040.3.1,prot_P-littoralis_Contig1152.19.2,prot_P-littoralis_Contig1185.4.1,prot_P-littoralis_Contig1185.7.1,prot_P-littoralis_Contig126.108.1,prot_P-littoralis_Contig1279.15.1,prot_P-littoralis_Contig129.89.1,prot_P-littoralis_Contig1353.1.1,prot_P-littoralis_Contig1358.3.1,prot_P-littoralis_Contig1358.5.1,prot_P-littoralis_Contig137.98.1…	prot_S-polyschides_M_contig126649.2424.1	prot_S-promiscuus_M_contig33.10366.1,prot_S-promiscuus_M_contig47.13959.1	SJ00976,SJ00978,SJ21440	prot_S-latissima_F_contig1113.926.1	prot_S-rigidula_F_contig9766.2.1
OG0000040	FALSE	prot_D-dichotoma_M_contig1263.2053.1,prot_D-dichotoma_M_contig1536.3786.1,prot_D-dichotoma_M_contig1865.5583.1,prot_D-dichotoma_M_contig209.6795.1,prot_D-dichotoma_M_contig27.9314.1,prot_D-dichotoma_M_contig286.9859.1,prot_D-dichotoma_M_contig2915.10088.1,prot_D-dichotoma_M_contig3973.13050.1,prot_D-dichotoma_M_contig4073.13344.1,prot_D-dichotoma_M_contig411.13442.1,prot_D-dichotoma_M_contig5205.…	Ec-03_000370.1,Ec-05_000090.1,Ec-05_000480.1,Ec-05_000770.1,Ec-06_010120.1,Ec-23_003800.1	prot_M-pyrifera_M_contig1060.1282.1,prot_M-pyrifera_M_contig16639.6895.1,prot_M-pyrifera_M_contig1967.7719.1,prot_M-pyrifera_M_contig977.22499.1	prot_M-clavaeformis_F_contig1317.2568.1,prot_M-clavaeformis_F_contig195.5992.1,prot_M-clavaeformis_F_contig2289.7367.1,prot_M-clavaeformis_F_contig2750.9025.1,prot_M-clavaeformis_F_contig3564.11343.1,prot_M-clavaeformis_F_contig399.12416.1,prot_M-clavaeformis_F_contig4963.14524.1	prot_P-littoralis_Contig168.35.2,prot_P-littoralis_Contig181.9.1	prot_S-polyschides_M_contig13862.3313.1,prot_S-polyschides_M_contig15436.4264.1,prot_S-polyschides_M_contig15850.4505.1,prot_S-polyschides_M_contig1609.4654.1,prot_S-polyschides_M_contig1910.6124.1,prot_S-polyschides_M_contig3488.11271.1,prot_S-polyschides_M_contig4331.12934.1,prot_S-polyschides_M_contig4379.13000.1,prot_S-polyschides_M_contig563.14879.1	prot_S-promiscuus_M_contig17.3929.1,prot_S-promiscuus_M_contig17.3933.1,prot_S-promiscuus_M_contig17.3935.1,prot_S-promiscuus_M_contig17.3936.1,prot_S-promiscuus_M_contig17.3944.1,prot_S-promiscuus_M_contig17.3945.1,prot_S-promiscuus_M_contig17.4057.1,prot_S-promiscuus_M_contig18.4061.1,prot_S-promiscuus_M_contig26.7702.1,prot_S-promiscuus_M_contig27.7824.1,prot_S-promiscuus_M_contig27.7849.1,pro…	SJ01016,SJ01413,SJ01899,SJ01901,SJ04545,SJ05747,SJ07921,SJ08363,SJ08637,SJ13690,SJ14550,SJ16532,SJ16538,SJ16539,SJ16540,SJ16542,SJ16543,SJ16546,SJ17973,SJ18345,SJ19196,SJ21290	prot_S-latissima_F_contig1486.3479.1,prot_S-latissima_F_contig517.12838.1,prot_S-latissima_F_contig608.13913.1,prot_S-latissima_F_contig727.15139.1,prot_S-latissima_F_contig856.16450.1,prot_S-latissima_F_contig969.17442.1	prot_S-rigidula_F_contig14878.1.1,prot_S-rigidula_F_contig7248.2.1
OG0000041	FALSE	prot_D-dichotoma_M_contig1000.105.1,prot_D-dichotoma_M_contig1198.1592.1,prot_D-dichotoma_M_contig1656.4534.1,prot_D-dichotoma_M_contig2245.7521.1,prot_D-dichotoma_M_contig321.11083.1,prot_D-dichotoma_M_contig3574.12048.1,prot_D-dichotoma_M_contig4053.13296.1,prot_D-dichotoma_M_contig5060.15429.1,prot_D-dichotoma_M_contig5073.15449.1,prot_D-dichotoma_M_contig5712.16496.1,prot_D-dichotoma_M_contig…	NA	prot_M-pyrifera_M_contig8385.19581.1	prot_M-clavaeformis_F_contig4506.13568.1	prot_P-littoralis_Contig1.77.1,prot_P-littoralis_Contig103.13.1,prot_P-littoralis_Contig108.54.1,prot_P-littoralis_Contig1094.13.1,prot_P-littoralis_Contig112.87.1,prot_P-littoralis_Contig1128.20.1,prot_P-littoralis_Contig120.57.1,prot_P-littoralis_Contig122.11.1,prot_P-littoralis_Contig1226.5.1,prot_P-littoralis_Contig1245.14.1,prot_P-littoralis_Contig1300.3.1,prot_P-littoralis_Contig1304.5.1,pr…	prot_S-polyschides_M_contig2022.6599.1,prot_S-polyschides_M_contig3496.11289.1,prot_S-polyschides_M_contig575.15054.1,prot_S-polyschides_M_contig6977.16624.1,prot_S-polyschides_M_contig836.18079.1	prot_S-promiscuus_M_contig11.1397.1,prot_S-promiscuus_M_contig31.9942.1,prot_S-promiscuus_M_contig57.15737.1	SJ10517,SJ15331,SJ20146	NA	prot_S-rigidula_F_contig10704.4.1,prot_S-rigidula_F_contig11449.1.1,prot_S-rigidula_F_contig13242.1.1,prot_S-rigidula_F_contig13717.1.1,prot_S-rigidula_F_contig14626.1.1,prot_S-rigidula_F_contig15348.3.1,prot_S-rigidula_F_contig17196.1.1,prot_S-rigidula_F_contig174.1.1,prot_S-rigidula_F_contig18052.3.1,prot_S-rigidula_F_contig18652.2.1,prot_S-rigidula_F_contig18959.1.1,prot_S-rigidula_F_contig207…
OG0000042	FALSE	NA	Ec-00_003730.1,Ec-12_000720.1	NA	NA	prot_P-littoralis_Contig1060.1.1,prot_P-littoralis_Contig11.193.1,prot_P-littoralis_Contig11.194.1,prot_P-littoralis_Contig1104.5.2,prot_P-littoralis_Contig1166.6.1,prot_P-littoralis_Contig1229.15.1,prot_P-littoralis_Contig123.105.1,prot_P-littoralis_Contig130.7.1,prot_P-littoralis_Contig131.102.1,prot_P-littoralis_Contig1332.18.1,prot_P-littoralis_Contig1378.11.1,prot_P-littoralis_Contig1394.2.1…	prot_S-polyschides_M_contig18780.6005.1,prot_S-polyschides_M_contig22878.7766.1,prot_S-polyschides_M_contig33714.10943.1,prot_S-polyschides_M_contig3773.11843.1,prot_S-polyschides_M_contig581.15135.1	prot_S-promiscuus_M_contig12.2130.1	SJ10730,SJ19271,SJ19272	prot_S-latissima_F_contig310.9514.1,prot_S-latissima_F_contig310.9515.1	prot_S-rigidula_F_contig24666.1.1
OG0000043	FALSE	prot_D-dichotoma_M_contig2371.8072.1,prot_D-dichotoma_M_contig2434.8345.1,prot_D-dichotoma_M_contig255.8769.1,prot_D-dichotoma_M_contig255.8770.1,prot_D-dichotoma_M_contig255.8773.1,prot_D-dichotoma_M_contig2563.8816.1,prot_D-dichotoma_M_contig3080.10657.1,prot_D-dichotoma_M_contig334.11454.1,prot_D-dichotoma_M_contig3440.11698.1,prot_D-dichotoma_M_contig387.12804.1,prot_D-dichotoma_M_contig387.1…	Ec-00_009900.1,Ec-04_003940.1,Ec-04_003950.1,Ec-04_003960.1,Ec-10_005730.1,Ec-20_003840.1	prot_M-pyrifera_M_contig14360.6241.1,prot_M-pyrifera_M_contig1836.7389.1,prot_M-pyrifera_M_contig2011.7825.1,prot_M-pyrifera_M_contig3922.11594.1,prot_M-pyrifera_M_contig4622.12614.1	prot_M-clavaeformis_F_contig17.4874.1,prot_M-clavaeformis_F_contig2824.9263.1,prot_M-clavaeformis_F_contig2824.9264.1,prot_M-clavaeformis_F_contig296.9649.1,prot_M-clavaeformis_F_contig3927.12276.1,prot_M-clavaeformis_F_contig4793.14163.1,prot_M-clavaeformis_F_contig6.16342.1,prot_M-clavaeformis_F_contig7674.18827.1,prot_M-clavaeformis_F_contig854.19806.1	prot_P-littoralis_Contig39.70.4,prot_P-littoralis_Contig530.11.2,prot_P-littoralis_Contig65.110.2,prot_P-littoralis_Contig65.71.1,prot_P-littoralis_Contig861.2.1	prot_S-polyschides_M_contig16180.4705.1,prot_S-polyschides_M_contig3314.10811.1,prot_S-polyschides_M_contig38961.12125.1,prot_S-polyschides_M_contig6718.16318.1	prot_S-promiscuus_M_contig45.13692.1,prot_S-promiscuus_M_contig6.16098.1,prot_S-promiscuus_M_contig6.16099.1,prot_S-promiscuus_M_contig6.16100.1,prot_S-promiscuus_M_contig6.16101.1,prot_S-promiscuus_M_contig9.19062.1,prot_S-promiscuus_M_contig9.19063.1,prot_S-promiscuus_M_contig9.19070.1	SJ05263,SJ05367,SJ06848,SJ06849,SJ06850,SJ06852,SJ08124,SJ08125,SJ08461,SJ08783,SJ09186,SJ09844,SJ11726,SJ15439,SJ15440,SJ15445,SJ16368,SJ16369,SJ16370,SJ16373,SJ16375,SJ16377,SJ18625,SJ19604,SJ19605,SJ19609,SJ19610,SJ19612,SJ19613	prot_S-latissima_F_contig1234.1807.1,prot_S-latissima_F_contig1247.1882.1,prot_S-latissima_F_contig1247.1883.1,prot_S-latissima_F_contig1321.2445.1,prot_S-latissima_F_contig1377.2802.1,prot_S-latissima_F_contig1780.4966.1,prot_S-latissima_F_contig2684.8372.1,prot_S-latissima_F_contig560.13334.1,prot_S-latissima_F_contig560.13339.1,prot_S-latissima_F_contig92.16946.1	prot_S-rigidula_F_contig13758.1.1,prot_S-rigidula_F_contig17344.1.1,prot_S-rigidula_F_contig22443.1.1,prot_S-rigidula_F_contig3580.1.3,prot_S-rigidula_F_contig4383.1.2,prot_S-rigidula_F_contig772.3.1,prot_S-rigidula_F_contig8319.1.1
OG0000044	FALSE	prot_D-dichotoma_M_contig10.68.1,prot_D-dichotoma_M_contig1041.442.1,prot_D-dichotoma_M_contig1115.981.1,prot_D-dichotoma_M_contig1119.1015.1,prot_D-dichotoma_M_contig1177.1438.1,prot_D-dichotoma_M_contig1193.1556.1,prot_D-dichotoma_M_contig1201.1639.1,prot_D-dichotoma_M_contig1262.2052.1,prot_D-dichotoma_M_contig1288.2196.1,prot_D-dichotoma_M_contig13.2322.1,prot_D-dichotoma_M_contig1301.2347.1,…	Ec-04_002470.1,Ec-13_000020.1	prot_M-pyrifera_M_contig5406.13910.1,prot_M-pyrifera_M_contig59974.14918.1,prot_M-pyrifera_M_contig59974.14919.1	prot_M-clavaeformis_F_contig11552.1422.1,prot_M-clavaeformis_F_contig12258.1952.1,prot_M-clavaeformis_F_contig13.2452.1,prot_M-clavaeformis_F_contig2505.8181.1,prot_M-clavaeformis_F_contig4597.13741.1,prot_M-clavaeformis_F_contig7028.17962.1,prot_M-clavaeformis_F_contig7555.18674.1	prot_P-littoralis_Contig1.392.1,prot_P-littoralis_Contig1396.2.1,prot_P-littoralis_Contig164.50.1,prot_P-littoralis_Contig164.51.1,prot_P-littoralis_Contig28.3.3,prot_P-littoralis_Contig571.29.1	prot_S-polyschides_M_contig3070.10195.1,prot_S-polyschides_M_contig83901.18109.1	prot_S-promiscuus_M_contig10.953.1,prot_S-promiscuus_M_contig6.15956.1,prot_S-promiscuus_M_contig8.18380.1	SJ05553,SJ13209	prot_S-latissima_F_contig340.10166.1,prot_S-latissima_F_contig402.11173.1,prot_S-latissima_F_contig43.11615.1	prot_S-rigidula_F_contig21435.2.1,prot_S-rigidula_F_contig26000.1.1,prot_S-rigidula_F_contig3382.3.1,prot_S-rigidula_F_contig5132.3.1
OG0000045	FALSE	prot_D-dichotoma_M_contig1681.4669.1,prot_D-dichotoma_M_contig2142.7066.1,prot_D-dichotoma_M_contig2783.9597.1,prot_D-dichotoma_M_contig3986.13066.1,prot_D-dichotoma_M_contig4004.13179.1,prot_D-dichotoma_M_contig4732.14763.1,prot_D-dichotoma_M_contig5190.15643.1	NA	prot_M-pyrifera_M_contig1209.4300.1,prot_M-pyrifera_M_contig14340.6237.1,prot_M-pyrifera_M_contig16078.6751.1,prot_M-pyrifera_M_contig35974.11023.1,prot_M-pyrifera_M_contig40475.11764.1,prot_M-pyrifera_M_contig53398.13797.1,prot_M-pyrifera_M_contig69766.16710.1,prot_M-pyrifera_M_contig84792.19757.1,prot_M-pyrifera_M_contig93150.21521.1,prot_M-pyrifera_M_contig94233.21760.1,prot_M-pyrifera_M_conti…	NA	prot_P-littoralis_Contig196.4.1	prot_S-polyschides_M_contig12425.2256.1,prot_S-polyschides_M_contig128070.2550.1,prot_S-polyschides_M_contig12995.2691.1,prot_S-polyschides_M_contig14450.3686.1,prot_S-polyschides_M_contig21369.7101.1,prot_S-polyschides_M_contig30839.10222.1,prot_S-polyschides_M_contig41179.12561.1,prot_S-polyschides_M_contig5884.15240.1,prot_S-polyschides_M_contig6006.15390.1,prot_S-polyschides_M_contig7397.1709…	prot_S-promiscuus_M_contig53.15455.1,prot_S-promiscuus_M_contig6.16458.1	SJ02421,SJ02485,SJ03733,SJ03770,SJ04042,SJ04661,SJ07429,SJ07447,SJ09805,SJ09806,SJ11771,SJ14139,SJ15269,SJ16663,SJ19708,SJ21224,SJ21533,SJ21778	prot_S-latissima_F_contig1284.2144.1,prot_S-latissima_F_contig1476.3435.1,prot_S-latissima_F_contig1495.3515.1,prot_S-latissima_F_contig1850.5274.1,prot_S-latissima_F_contig286.8901.1,prot_S-latissima_F_contig2892.8973.1,prot_S-latissima_F_contig301.9287.1,prot_S-latissima_F_contig393.10994.1,prot_S-latissima_F_contig510.12768.1,prot_S-latissima_F_contig77.15550.1,prot_S-latissima_F_contig868.165…	prot_S-rigidula_F_contig10405.1.1,prot_S-rigidula_F_contig11358.1.1,prot_S-rigidula_F_contig12521.3.1,prot_S-rigidula_F_contig12558.1.1,prot_S-rigidula_F_contig12724.1.1,prot_S-rigidula_F_contig13125.1.1,prot_S-rigidula_F_contig13338.3.1,prot_S-rigidula_F_contig14285.2.1,prot_S-rigidula_F_contig1489.1.1,prot_S-rigidula_F_contig15171.1.1,prot_S-rigidula_F_contig18313.2.1,prot_S-rigidula_F_contig18…
OG0000046	FALSE	prot_D-dichotoma_M_contig1364.2721.1,prot_D-dichotoma_M_contig141.3039.1,prot_D-dichotoma_M_contig1425.3120.1,prot_D-dichotoma_M_contig1429.3132.1,prot_D-dichotoma_M_contig1442.3239.1,prot_D-dichotoma_M_contig1442.3240.1,prot_D-dichotoma_M_contig153.3760.1,prot_D-dichotoma_M_contig1632.4414.1,prot_D-dichotoma_M_contig1632.4415.1,prot_D-dichotoma_M_contig1632.4416.1,prot_D-dichotoma_M_contig1733.4…	Ec-00_007250.1	NA	prot_M-clavaeformis_F_contig2155.6894.1,prot_M-clavaeformis_F_contig263.8614.1	prot_P-littoralis_Contig3.86.1,prot_P-littoralis_Contig301.54.2,prot_P-littoralis_Contig301.55.1,prot_P-littoralis_Contig590.26.1	prot_S-polyschides_M_contig7208.16887.1	NA	SJ01614,SJ01616,SJ03679,SJ04616,SJ06278,SJ06279,SJ06280,SJ07156,SJ07157,SJ07758,SJ08500,SJ08502,SJ08503,SJ10010,SJ14452,SJ19478,SJ19479,SJ19760,SJ20786,SJ22269,SJ22270,SJ22272	prot_S-latissima_F_contig10.13.1,prot_S-latissima_F_contig10.7.1,prot_S-latissima_F_contig10.9.1,prot_S-latissima_F_contig3055.9408.1,prot_S-latissima_F_contig553.13263.1,prot_S-latissima_F_contig691.14715.1,prot_S-latissima_F_contig901.16850.1	prot_S-rigidula_F_contig1604.1.2
OG0000047	FALSE	prot_D-dichotoma_M_contig2182.7250.1,prot_D-dichotoma_M_contig2895.9991.1,prot_D-dichotoma_M_contig54.15999.1,prot_D-dichotoma_M_contig912.19866.1,prot_D-dichotoma_M_contig912.19867.1	Ec-07_005510.1,Ec-07_007660.1,Ec-07_007670.1,Ec-07_007690.1,Ec-07_007740.1,Ec-07_007750.1,Ec-07_007760.1,Ec-07_007780.1,Ec-08_005080.1,Ec-19_001880.1	prot_M-pyrifera_M_contig1286.5743.1,prot_M-pyrifera_M_contig25321.8992.1,prot_M-pyrifera_M_contig7454.17643.1,prot_M-pyrifera_M_contig8610.20067.1,prot_M-pyrifera_M_contig9498.21913.1	prot_M-clavaeformis_F_contig1247.2099.1,prot_M-clavaeformis_F_contig1627.4471.1,prot_M-clavaeformis_F_contig1800.5380.1,prot_M-clavaeformis_F_contig2437.7932.1	prot_P-littoralis_Contig167.13.1,prot_P-littoralis_Contig167.23.1,prot_P-littoralis_Contig167.35.1,prot_P-littoralis_Contig167.39.1,prot_P-littoralis_Contig178.97.1,prot_P-littoralis_Contig291.75.1,prot_P-littoralis_Contig629.20.1,prot_P-littoralis_Contig687.42.1	prot_S-polyschides_M_contig10333.310.1,prot_S-polyschides_M_contig1224.2100.1,prot_S-polyschides_M_contig15144.4075.1,prot_S-polyschides_M_contig17601.5447.1	prot_S-promiscuus_M_contig26.7684.1,prot_S-promiscuus_M_contig26.7685.1,prot_S-promiscuus_M_contig7.17039.1,prot_S-promiscuus_M_contig7.17049.1,prot_S-promiscuus_M_contig7.17050.1,prot_S-promiscuus_M_contig7.17058.1,prot_S-promiscuus_M_contig7.17062.1	SJ00241,SJ00242,SJ00243,SJ00244,SJ00245,SJ00679,SJ00682,SJ00683,SJ05684,SJ05685,SJ05687,SJ10288,SJ10289,SJ10290,SJ10291,SJ10292,SJ10293,SJ10294,SJ10296,SJ10297,SJ10298,SJ10299,SJ10300,SJ10305,SJ20584,SJ20585	prot_S-latissima_F_contig1198.1536.1,prot_S-latissima_F_contig1253.1927.1,prot_S-latissima_F_contig213.6510.1,prot_S-latissima_F_contig213.6511.1,prot_S-latissima_F_contig213.6512.1,prot_S-latissima_F_contig213.6513.1,prot_S-latissima_F_contig213.6515.1,prot_S-latissima_F_contig311.9524.1,prot_S-latissima_F_contig311.9525.1,prot_S-latissima_F_contig311.9528.1,prot_S-latissima_F_contig311.9529.1,p…	prot_S-rigidula_F_contig16795.2.1
OG0000048	FALSE	NA	Ec-02_004850.1,Ec-03_004270.1,Ec-03_004310.1,Ec-04_004340.1,Ec-04_004460.1,Ec-04_004510.1,Ec-06_008790.1,Ec-06_009040.1,Ec-06_009480.1,Ec-23_000880.1,Ec-23_001440.1,Ec-23_001650.1,Ec-23_001660.1,Ec-24_001290.1	NA	prot_M-clavaeformis_F_contig1682.4766.1,prot_M-clavaeformis_F_contig4174.12870.1,prot_M-clavaeformis_F_contig52.15000.1,prot_M-clavaeformis_F_contig8802.20090.1	prot_P-littoralis_Contig1048.14.1,prot_P-littoralis_Contig1380.5.2,prot_P-littoralis_Contig161.79.1,prot_P-littoralis_Contig308.43.2,prot_P-littoralis_Contig457.49.2,prot_P-littoralis_Contig462.10.1,prot_P-littoralis_Contig462.31.1,prot_P-littoralis_Contig485.59.2,prot_P-littoralis_Contig5.11.1,prot_P-littoralis_Contig972.23.1	prot_S-polyschides_M_contig10582.520.1,prot_S-polyschides_M_contig21150.7007.1,prot_S-polyschides_M_contig27643.9368.1,prot_S-polyschides_M_contig38484.12019.1,prot_S-polyschides_M_contig56217.14871.1,prot_S-polyschides_M_contig64894.16024.1,prot_S-polyschides_M_contig7019.16676.1,prot_S-polyschides_M_contig94530.19244.1,prot_S-polyschides_M_contig9831.19603.1,prot_S-polyschides_M_contig9831.1960…	prot_S-promiscuus_M_contig11.1640.1,prot_S-promiscuus_M_contig21.6190.1,prot_S-promiscuus_M_contig21.6215.1,prot_S-promiscuus_M_contig23.6701.1,prot_S-promiscuus_M_contig27.7917.1,prot_S-promiscuus_M_contig27.7918.1,prot_S-promiscuus_M_contig32.10202.1,prot_S-promiscuus_M_contig32.10207.1,prot_S-promiscuus_M_contig46.13767.1,prot_S-promiscuus_M_contig46.13878.1,prot_S-promiscuus_M_contig54.15520.…	SJ03187,SJ03686,SJ06743,SJ06744,SJ07705,SJ08194,SJ10456,SJ10913,SJ10922,SJ11612,SJ12535,SJ12669,SJ17340,SJ18441,SJ18820,SJ20788,SJ20790,SJ20791,SJ20792,SJ22308,SJ22537,SJ22542	prot_S-latissima_F_contig1254.1936.1,prot_S-latissima_F_contig1268.2034.1,prot_S-latissima_F_contig1268.2035.1,prot_S-latissima_F_contig1268.2036.1,prot_S-latissima_F_contig1503.3576.1,prot_S-latissima_F_contig1503.3577.1	prot_S-rigidula_F_contig1249.3.1,prot_S-rigidula_F_contig1392.3.1,prot_S-rigidula_F_contig17085.2.2,prot_S-rigidula_F_contig21070.2.1,prot_S-rigidula_F_contig6900.3.1
OG0000049	FALSE	prot_D-dichotoma_M_contig1.18.1,prot_D-dichotoma_M_contig1019.252.1,prot_D-dichotoma_M_contig1034.377.1,prot_D-dichotoma_M_contig1062.595.1,prot_D-dichotoma_M_contig1102.905.1,prot_D-dichotoma_M_contig1135.1138.1,prot_D-dichotoma_M_contig1135.1139.1,prot_D-dichotoma_M_contig118.1452.1,prot_D-dichotoma_M_contig124.1898.1,prot_D-dichotoma_M_contig1282.2162.1,prot_D-dichotoma_M_contig1362.2711.1,pro…	NA	NA	NA	prot_P-littoralis_Contig118.32.1,prot_P-littoralis_Contig121.120.1,prot_P-littoralis_Contig221.100.1,prot_P-littoralis_Contig284.42.1,prot_P-littoralis_Contig422.4.1,prot_P-littoralis_Contig44.89.1,prot_P-littoralis_Contig555.24.1,prot_P-littoralis_Contig611.13.1,prot_P-littoralis_Contig846.2.1,prot_P-littoralis_Contig907.4.1,prot_P-littoralis_Contig951.2.1	prot_S-polyschides_M_contig30820.10219.1	NA	SJ09802,SJ09803,SJ14022	NA	prot_S-rigidula_F_contig12062.1.1,prot_S-rigidula_F_contig12244.1.1,prot_S-rigidula_F_contig12863.2.1,prot_S-rigidula_F_contig14314.2.1,prot_S-rigidula_F_contig14409.1.1,prot_S-rigidula_F_contig1538.5.1,prot_S-rigidula_F_contig19225.1.1,prot_S-rigidula_F_contig20736.2.1,prot_S-rigidula_F_contig23385.1.1,prot_S-rigidula_F_contig24543.2.1,prot_S-rigidula_F_contig26439.1.1,prot_S-rigidula_F_contig26…
OG0000050	FALSE	prot_D-dichotoma_M_contig1006.142.1,prot_D-dichotoma_M_contig1138.1151.1,prot_D-dichotoma_M_contig1138.1154.1,prot_D-dichotoma_M_contig1227.1801.1,prot_D-dichotoma_M_contig1240.1911.1,prot_D-dichotoma_M_contig1407.3019.1,prot_D-dichotoma_M_contig1646.4479.1,prot_D-dichotoma_M_contig198.6139.1,prot_D-dichotoma_M_contig198.6140.1,prot_D-dichotoma_M_contig199.6205.1,prot_D-dichotoma_M_contig199.6206…	Ec-03_004750.1,Ec-04_003580.1,Ec-19_002050.1,Ec-28_000280.1,Ec-28_000300.1	prot_M-pyrifera_M_contig117596.3637.1	prot_M-clavaeformis_F_contig1268.2251.1,prot_M-clavaeformis_F_contig2379.7697.1,prot_M-clavaeformis_F_contig2706.8880.1,prot_M-clavaeformis_F_contig427.13064.1,prot_M-clavaeformis_F_contig5170.14950.1,prot_M-clavaeformis_F_contig575.15920.1	prot_P-littoralis_Contig1010.15.6,prot_P-littoralis_Contig1272.5.1,prot_P-littoralis_Contig353.64.1,prot_P-littoralis_Contig934.20.5,prot_P-littoralis_Contig965.16.3	prot_S-polyschides_M_contig10156.160.1,prot_S-polyschides_M_contig10156.161.1,prot_S-polyschides_M_contig1495.3959.1,prot_S-polyschides_M_contig1751.5403.1,prot_S-polyschides_M_contig190.6085.1,prot_S-polyschides_M_contig3248.10652.1,prot_S-polyschides_M_contig4890.13839.1,prot_S-polyschides_M_contig4890.13840.1,prot_S-polyschides_M_contig721.16889.1,prot_S-polyschides_M_contig7702.17411.1,prot_S…	prot_S-promiscuus_M_contig1.307.1,prot_S-promiscuus_M_contig35.10996.1,prot_S-promiscuus_M_contig38.11680.1,prot_S-promiscuus_M_contig7.17387.1	SJ00286,SJ05451,SJ05646,SJ06740,SJ09036,SJ09610,SJ09617,SJ09621,SJ10945,SJ12241,SJ18149,SJ18169,SJ19222	prot_S-latissima_F_contig124.1838.1,prot_S-latissima_F_contig124.1839.1,prot_S-latissima_F_contig124.1842.1,prot_S-latissima_F_contig124.1844.1,prot_S-latissima_F_contig124.1845.1,prot_S-latissima_F_contig160.4130.1,prot_S-latissima_F_contig33.9939.1	prot_S-rigidula_F_contig10698.1.1,prot_S-rigidula_F_contig11323.1.1,prot_S-rigidula_F_contig12332.1.1,prot_S-rigidula_F_contig1607.1.1,prot_S-rigidula_F_contig18818.1.1,prot_S-rigidula_F_contig22627.1.1,prot_S-rigidula_F_contig22794.1.1,prot_S-rigidula_F_contig22794.2.1,prot_S-rigidula_F_contig24606.2.1,prot_S-rigidula_F_contig26873.1.1,prot_S-rigidula_F_contig4057.1.1,prot_S-rigidula_F_contig470…
OG0000051	FALSE	prot_D-dichotoma_M_contig1162.1334.1,prot_D-dichotoma_M_contig1162.1340.1,prot_D-dichotoma_M_contig1162.1346.1,prot_D-dichotoma_M_contig1180.1467.1,prot_D-dichotoma_M_contig1215.1734.1,prot_D-dichotoma_M_contig1602.4215.1,prot_D-dichotoma_M_contig1647.4482.1,prot_D-dichotoma_M_contig182.5382.1,prot_D-dichotoma_M_contig215.7116.1,prot_D-dichotoma_M_contig2160.7161.1,prot_D-dichotoma_M_contig227.76…	Ec-00_005440.1,Ec-04_002240.1,Ec-07_000450.1,Ec-21_004350.1,Ec-26_005820.1,Ec-26_005890.1,Ec-26_006380.1,Ec-26_006470.1	prot_M-pyrifera_M_contig11420.2958.1,prot_M-pyrifera_M_contig13213.5883.1,prot_M-pyrifera_M_contig15089.6452.1,prot_M-pyrifera_M_contig17814.7216.1,prot_M-pyrifera_M_contig35234.10907.1,prot_M-pyrifera_M_contig3903.11564.1,prot_M-pyrifera_M_contig55928.14229.1,prot_M-pyrifera_M_contig60078.14932.1	prot_M-clavaeformis_F_contig13797.2960.1,prot_M-clavaeformis_F_contig4074.12641.1	prot_P-littoralis_Contig14.212.1,prot_P-littoralis_Contig277.84.1,prot_P-littoralis_Contig53.9.1,prot_P-littoralis_Contig64.16.1,prot_P-littoralis_Contig64.35.1,prot_P-littoralis_Contig64.7.1,prot_P-littoralis_Contig808.9.1,prot_P-littoralis_Contig989.10.1	prot_S-polyschides_M_contig13567.3078.1,prot_S-polyschides_M_contig14073.3458.1,prot_S-polyschides_M_contig15422.4257.1,prot_S-polyschides_M_contig16373.4806.1,prot_S-polyschides_M_contig17331.5301.1,prot_S-polyschides_M_contig23135.7859.1,prot_S-polyschides_M_contig2518.8606.1,prot_S-polyschides_M_contig30679.10187.1,prot_S-polyschides_M_contig31336.10347.1,prot_S-polyschides_M_contig34743.11245…	prot_S-promiscuus_M_contig14.3002.1,prot_S-promiscuus_M_contig14.3009.1,prot_S-promiscuus_M_contig14.3013.1,prot_S-promiscuus_M_contig14.3041.1,prot_S-promiscuus_M_contig14.3044.1,prot_S-promiscuus_M_contig14.3088.1,prot_S-promiscuus_M_contig35.10993.1,prot_S-promiscuus_M_contig51.15205.1,prot_S-promiscuus_M_contig51.15210.1,prot_S-promiscuus_M_contig51.15216.1	SJ01167,SJ01169,SJ02958,SJ19421,SJ21545,SJ21546,SJ22468	prot_S-latissima_F_contig130.2274.1,prot_S-latissima_F_contig130.2277.1,prot_S-latissima_F_contig130.2286.1,prot_S-latissima_F_contig186.5301.1,prot_S-latissima_F_contig260.8134.1	prot_S-rigidula_F_contig12286.3.1,prot_S-rigidula_F_contig13052.3.1,prot_S-rigidula_F_contig14147.3.1,prot_S-rigidula_F_contig18748.3.1,prot_S-rigidula_F_contig19106.4.1,prot_S-rigidula_F_contig20151.3.1,prot_S-rigidula_F_contig20345.3.1,prot_S-rigidula_F_contig24211.1.1,prot_S-rigidula_F_contig5561.4.1
OG0000052	FALSE	prot_D-dichotoma_M_contig2828.9777.1	NA	prot_M-pyrifera_M_contig89784.20813.1	prot_M-clavaeformis_F_contig12209.1917.1,prot_M-clavaeformis_F_contig8305.19559.1	prot_P-littoralis_Contig1060.6.1,prot_P-littoralis_Contig108.119.1,prot_P-littoralis_Contig1089.4.1,prot_P-littoralis_Contig1091.17.1,prot_P-littoralis_Contig11.133.1,prot_P-littoralis_Contig136.90.1,prot_P-littoralis_Contig1477.3.1,prot_P-littoralis_Contig1598.4.1,prot_P-littoralis_Contig164.89.1,prot_P-littoralis_Contig167.61.1,prot_P-littoralis_Contig20.34.1,prot_P-littoralis_Contig206.6.1,pro…	prot_S-polyschides_M_contig19033.6092.1,prot_S-polyschides_M_contig45461.13291.1,prot_S-polyschides_M_contig46473.13481.1,prot_S-polyschides_M_contig61052.15526.1,prot_S-polyschides_M_contig67914.16406.1,prot_S-polyschides_M_contig84839.18205.1,prot_S-polyschides_M_contig90366.18852.1	prot_S-promiscuus_M_contig1.714.1,prot_S-promiscuus_M_contig65.16856.1,prot_S-promiscuus_M_contig7.17123.1	SJ18937	prot_S-latissima_F_contig58.13566.1	prot_S-rigidula_F_contig10011.1.1,prot_S-rigidula_F_contig11825.1.1,prot_S-rigidula_F_contig12322.1.1,prot_S-rigidula_F_contig15866.1.1,prot_S-rigidula_F_contig16912.1.1,prot_S-rigidula_F_contig18338.1.1,prot_S-rigidula_F_contig20762.1.1,prot_S-rigidula_F_contig20805.1.1,prot_S-rigidula_F_contig21058.1.1,prot_S-rigidula_F_contig22146.1.1,prot_S-rigidula_F_contig22274.1.1,prot_S-rigidula_F_contig2…
OG0000053	FALSE	prot_D-dichotoma_M_contig1432.3162.1,prot_D-dichotoma_M_contig1432.3163.1,prot_D-dichotoma_M_contig1871.5622.1,prot_D-dichotoma_M_contig2027.6448.1,prot_D-dichotoma_M_contig2073.6674.1,prot_D-dichotoma_M_contig58.16610.1,prot_D-dichotoma_M_contig75.18341.1,prot_D-dichotoma_M_contig75.18345.1,prot_D-dichotoma_M_contig793.18750.1,prot_D-dichotoma_M_contig985.20496.1	Ec-00_006270.1,Ec-00_006280.1,Ec-00_006350.1,Ec-01_004710.1,Ec-07_001470.1,Ec-15_000970.1,Ec-15_000980.1,Ec-15_001000.1,Ec-15_001010.1,Ec-15_001030.1,Ec-15_001170.1,Ec-17_000210.1,Ec-17_000220.1,Ec-17_001380.1,Ec-17_001410.1,Ec-17_002070.1,Ec-20_003280.1	prot_M-pyrifera_M_contig2233.8330.1	prot_M-clavaeformis_F_contig1048.501.1,prot_M-clavaeformis_F_contig1124.1182.1,prot_M-clavaeformis_F_contig2311.7458.1,prot_M-clavaeformis_F_contig3288.10611.1,prot_M-clavaeformis_F_contig599.16327.1,prot_M-clavaeformis_F_contig69.17688.1,prot_M-clavaeformis_F_contig820.19450.1	prot_P-littoralis_Contig106.103.1,prot_P-littoralis_Contig106.4.1,prot_P-littoralis_Contig106.9.1,prot_P-littoralis_Contig106.98.1,prot_P-littoralis_Contig107.105.1,prot_P-littoralis_Contig1138.8.1,prot_P-littoralis_Contig186.44.1,prot_P-littoralis_Contig186.77.2,prot_P-littoralis_Contig21.119.1,prot_P-littoralis_Contig323.22.1,prot_P-littoralis_Contig323.28.1,prot_P-littoralis_Contig511.15.1,pro…	prot_S-polyschides_M_contig31487.10391.1	prot_S-promiscuus_M_contig11.1664.1,prot_S-promiscuus_M_contig11.1675.1,prot_S-promiscuus_M_contig2.4894.1,prot_S-promiscuus_M_contig50.15084.1,prot_S-promiscuus_M_contig6.16311.1,prot_S-promiscuus_M_contig6.16428.1,prot_S-promiscuus_M_contig6.16432.1,prot_S-promiscuus_M_contig7.17580.1,prot_S-promiscuus_M_contig7.17581.1,prot_S-promiscuus_M_contig8.18332.1	SJ01725,SJ01728,SJ02281,SJ03405,SJ03412,SJ05023,SJ16121,SJ16124,SJ17430,SJ18325,SJ18824,SJ18829,SJ19127	prot_S-latissima_F_contig1342.2550.1,prot_S-latissima_F_contig2146.6559.1,prot_S-latissima_F_contig562.13357.1,prot_S-latissima_F_contig609.13916.1,prot_S-latissima_F_contig85.16374.1,prot_S-latissima_F_contig922.17002.1	prot_S-rigidula_F_contig1637.2.1,prot_S-rigidula_F_contig16815.2.1,prot_S-rigidula_F_contig17812.3.1,prot_S-rigidula_F_contig18655.1.1,prot_S-rigidula_F_contig2987.3.3,prot_S-rigidula_F_contig4560.1.1,prot_S-rigidula_F_contig773.2.1,prot_S-rigidula_F_contig7922.1.1
OG0000054	FALSE	prot_D-dichotoma_M_contig102.255.1,prot_D-dichotoma_M_contig1023.288.1,prot_D-dichotoma_M_contig1086.737.1,prot_D-dichotoma_M_contig118.1445.1,prot_D-dichotoma_M_contig123.1817.1,prot_D-dichotoma_M_contig1277.2130.1,prot_D-dichotoma_M_contig1289.2201.1,prot_D-dichotoma_M_contig1289.2202.1,prot_D-dichotoma_M_contig1289.2203.1,prot_D-dichotoma_M_contig1313.2438.1,prot_D-dichotoma_M_contig1369.2741.…	Ec-23_002760.1	NA	prot_M-clavaeformis_F_contig5437.15431.1	prot_P-littoralis_Contig120.74.1,prot_P-littoralis_Contig1446.6.1,prot_P-littoralis_Contig1446.8.1,prot_P-littoralis_Contig368.49.1,prot_P-littoralis_Contig5.311.1,prot_P-littoralis_Contig523.18.1,prot_P-littoralis_Contig542.37.1,prot_P-littoralis_Contig592.1.1,prot_P-littoralis_Contig611.8.1,prot_P-littoralis_Contig766.10.1,prot_P-littoralis_Contig842.2.1,prot_P-littoralis_Contig993.7.1,prot_P-l…	NA	NA	SJ01376,SJ09961,SJ12549	prot_S-latissima_F_contig828.16141.1	prot_S-rigidula_F_contig20722.1.1,prot_S-rigidula_F_contig22770.1.4,prot_S-rigidula_F_contig7343.1.2
OG0000055	FALSE	prot_D-dichotoma_M_contig2051.6571.1,prot_D-dichotoma_M_contig5057.15416.1	Ec-00_003870.1,Ec-21_002390.1	prot_M-pyrifera_M_contig117843.3693.1	prot_M-clavaeformis_F_contig10426.452.1,prot_M-clavaeformis_F_contig12.1769.1,prot_M-clavaeformis_F_contig1232.1994.1,prot_M-clavaeformis_F_contig1644.4566.1,prot_M-clavaeformis_F_contig9409.20713.1	prot_P-littoralis_Contig1076.14.1,prot_P-littoralis_Contig118.17.1,prot_P-littoralis_Contig19.195.1,prot_P-littoralis_Contig258.51.1,prot_P-littoralis_Contig306.20.1,prot_P-littoralis_Contig322.34.1,prot_P-littoralis_Contig343.50.1,prot_P-littoralis_Contig435.63.2,prot_P-littoralis_Contig618.32.1,prot_P-littoralis_Contig657.4.1,prot_P-littoralis_Contig70.74.1	prot_S-polyschides_M_contig18933.6061.1,prot_S-polyschides_M_contig1980.6428.1,prot_S-polyschides_M_contig255.8701.1,prot_S-polyschides_M_contig55064.14700.1	prot_S-promiscuus_M_contig1.161.1,prot_S-promiscuus_M_contig43.13368.1	SJ00671,SJ00885,SJ00943,SJ01110,SJ01334,SJ01583,SJ02088,SJ02193,SJ02217,SJ02227,SJ02231,SJ02468,SJ02620,SJ03935,SJ04721,SJ05052,SJ05377,SJ05417,SJ05998,SJ06155,SJ06505,SJ06576,SJ06640,SJ07147,SJ07888,SJ09188,SJ09195,SJ09384,SJ09388,SJ10184,SJ10345,SJ10564,SJ11222,SJ12033,SJ13166,SJ13229,SJ13408,SJ14121,SJ14127,SJ14642,SJ16204,SJ18557,SJ18744,SJ20777,SJ20876,SJ22274,SJ22410,SJ22562	prot_S-latissima_F_contig1868.5329.1,prot_S-latissima_F_contig512.12780.1,prot_S-latissima_F_contig886.16700.1	prot_S-rigidula_F_contig10699.4.1,prot_S-rigidula_F_contig11810.1.1,prot_S-rigidula_F_contig12885.1.1,prot_S-rigidula_F_contig13729.1.1,prot_S-rigidula_F_contig14738.4.1,prot_S-rigidula_F_contig2199.1.1,prot_S-rigidula_F_contig22332.1.1,prot_S-rigidula_F_contig5584.1.1,prot_S-rigidula_F_contig6810.1.1,prot_S-rigidula_F_contig9735.1.1
OG0000056	FALSE	prot_D-dichotoma_M_contig1011.188.1,prot_D-dichotoma_M_contig3455.11743.1	Ec-01_001530.1,Ec-02_000560.1,Ec-11_004700.1	prot_M-pyrifera_M_contig2146.8134.1,prot_M-pyrifera_M_contig223.8325.1	prot_M-clavaeformis_F_contig1094.905.1,prot_M-clavaeformis_F_contig2362.7648.1,prot_M-clavaeformis_F_contig339.10897.1,prot_M-clavaeformis_F_contig5138.14895.1,prot_M-clavaeformis_F_contig5905.16207.1	prot_P-littoralis_Contig475.1.14,prot_P-littoralis_Contig475.1.9,prot_P-littoralis_Contig518.32.3,prot_P-littoralis_Contig930.19.1	prot_S-polyschides_M_contig10421.385.1,prot_S-polyschides_M_contig37552.11818.1,prot_S-polyschides_M_contig5131.14197.1,prot_S-polyschides_M_contig56547.14923.1,prot_S-polyschides_M_contig5855.15203.1,prot_S-polyschides_M_contig796.17662.1,prot_S-polyschides_M_contig7961.17663.1	prot_S-promiscuus_M_contig15.3258.1,prot_S-promiscuus_M_contig15.3259.1,prot_S-promiscuus_M_contig15.3261.1	SJ01596,SJ02216,SJ02221,SJ02528,SJ03548,SJ03676,SJ04167,SJ04168,SJ05187,SJ05189,SJ05709,SJ06842,SJ07881,SJ07882,SJ07883,SJ08251,SJ08252,SJ08256,SJ08257,SJ08258,SJ08262,SJ09513,SJ12612,SJ13279,SJ13280,SJ13658,SJ17731,SJ17735,SJ17736,SJ19244,SJ20436,SJ20437,SJ20438,SJ20439,SJ20440,SJ20441,SJ20442,SJ20443,SJ20445,SJ20446,SJ20447,SJ20448	prot_S-latissima_F_contig1284.2146.1,prot_S-latissima_F_contig2511.7896.1,prot_S-latissima_F_contig280.8726.1,prot_S-latissima_F_contig280.8728.1,prot_S-latissima_F_contig3109.9523.1,prot_S-latissima_F_contig455.12018.1,prot_S-latissima_F_contig488.12357.1,prot_S-latissima_F_contig730.15172.1,prot_S-latissima_F_contig730.15173.1,prot_S-latissima_F_contig730.15174.1,prot_S-latissima_F_contig736.15…	prot_S-rigidula_F_contig11128.1.3,prot_S-rigidula_F_contig15107.1.1,prot_S-rigidula_F_contig17674.2.1,prot_S-rigidula_F_contig21680.1.1,prot_S-rigidula_F_contig25235.2.1,prot_S-rigidula_F_contig3046.2.1,prot_S-rigidula_F_contig6070.1.2
OG0000057	FALSE	prot_D-dichotoma_M_contig2449.8396.1	NA	prot_M-pyrifera_M_contig107945.1694.1,prot_M-pyrifera_M_contig145.6279.1,prot_M-pyrifera_M_contig85700.19981.1	prot_M-clavaeformis_F_contig198.6116.1	prot_P-littoralis_Contig135.126.1,prot_P-littoralis_Contig166.37.1,prot_P-littoralis_Contig39.106.1,prot_P-littoralis_Contig537.16.1	prot_S-polyschides_M_contig17213.5257.1,prot_S-polyschides_M_contig20683.6793.1,prot_S-polyschides_M_contig50990.14150.1,prot_S-polyschides_M_contig57149.15001.1	NA	SJ00657,SJ01316,SJ01332,SJ05099,SJ05227,SJ05229,SJ05266,SJ05321,SJ05441,SJ05764,SJ06305,SJ06627,SJ07308,SJ09007,SJ09289,SJ09504,SJ09790,SJ10003,SJ10894,SJ11655,SJ11852,SJ13191,SJ14420,SJ14565,SJ14685,SJ15319,SJ17910,SJ18075,SJ18636,SJ18762,SJ20818,SJ20819	prot_S-latissima_F_contig1079.657.1,prot_S-latissima_F_contig785.15740.1	prot_S-rigidula_F_contig10390.3.1,prot_S-rigidula_F_contig10681.1.1,prot_S-rigidula_F_contig11116.1.1,prot_S-rigidula_F_contig11848.2.1,prot_S-rigidula_F_contig11918.3.1,prot_S-rigidula_F_contig12333.1.1,prot_S-rigidula_F_contig12391.2.1,prot_S-rigidula_F_contig1246.1.1,prot_S-rigidula_F_contig14043.1.1,prot_S-rigidula_F_contig14255.3.1,prot_S-rigidula_F_contig14304.1.1,prot_S-rigidula_F_contig15…
OG0000058	FALSE	prot_D-dichotoma_M_contig1162.1335.1,prot_D-dichotoma_M_contig1162.1343.1,prot_D-dichotoma_M_contig1162.1348.1,prot_D-dichotoma_M_contig1215.1736.1,prot_D-dichotoma_M_contig1423.3110.1,prot_D-dichotoma_M_contig182.5385.1,prot_D-dichotoma_M_contig1924.5886.1,prot_D-dichotoma_M_contig2046.6541.1,prot_D-dichotoma_M_contig227.7612.1,prot_D-dichotoma_M_contig227.7620.1,prot_D-dichotoma_M_contig4417.14…	Ec-00_005470.1,Ec-03_003330.1,Ec-04_005030.1,Ec-07_000520.1,Ec-21_006160.1,Ec-26_005860.1,Ec-26_005900.1,Ec-26_006370.1,Ec-26_006450.1	prot_M-pyrifera_M_contig19854.7757.1,prot_M-pyrifera_M_contig3297.10519.1,prot_M-pyrifera_M_contig3483.10838.1,prot_M-pyrifera_M_contig36386.11108.1,prot_M-pyrifera_M_contig8200.19188.1	prot_M-clavaeformis_F_contig10743.735.1,prot_M-clavaeformis_F_contig11265.1198.1,prot_M-clavaeformis_F_contig1187.1640.1,prot_M-clavaeformis_F_contig3002.9795.1,prot_M-clavaeformis_F_contig8269.19512.1,prot_M-clavaeformis_F_contig951.20827.1	prot_P-littoralis_Contig159.62.1,prot_P-littoralis_Contig184.2.1,prot_P-littoralis_Contig450.10.1,prot_P-littoralis_Contig64.173.1,prot_P-littoralis_Contig64.2.1,prot_P-littoralis_Contig64.31.1,prot_P-littoralis_Contig64.9.1,prot_P-littoralis_Contig75.117.1,prot_P-littoralis_Contig808.32.1,prot_P-littoralis_Contig808.4.1,prot_P-littoralis_Contig989.13.1	prot_S-polyschides_M_contig1560.4394.1,prot_S-polyschides_M_contig24637.8409.1,prot_S-polyschides_M_contig26373.8973.1,prot_S-polyschides_M_contig27994.9466.1,prot_S-polyschides_M_contig35204.11343.1,prot_S-polyschides_M_contig36124.11524.1,prot_S-polyschides_M_contig36547.11591.1,prot_S-polyschides_M_contig37148.11726.1,prot_S-polyschides_M_contig6372.15885.1,prot_S-polyschides_M_contig93520.191…	prot_S-promiscuus_M_contig14.3005.1,prot_S-promiscuus_M_contig14.3010.1,prot_S-promiscuus_M_contig14.3035.1,prot_S-promiscuus_M_contig14.3042.1,prot_S-promiscuus_M_contig14.3087.1,prot_S-promiscuus_M_contig19.4661.1,prot_S-promiscuus_M_contig27.8020.1,prot_S-promiscuus_M_contig51.15201.1,prot_S-promiscuus_M_contig51.15207.1,prot_S-promiscuus_M_contig51.15213.1,prot_S-promiscuus_M_contig6.16212.1	SJ08608,SJ12704	prot_S-latissima_F_contig1039.352.1,prot_S-latissima_F_contig1142.1187.1,prot_S-latissima_F_contig130.2285.1,prot_S-latissima_F_contig130.2289.1,prot_S-latissima_F_contig186.5304.1,prot_S-latissima_F_contig260.8136.1,prot_S-latissima_F_contig522.12952.1	prot_S-rigidula_F_contig10839.2.1,prot_S-rigidula_F_contig11788.3.1,prot_S-rigidula_F_contig14458.1.1,prot_S-rigidula_F_contig1516.2.1,prot_S-rigidula_F_contig16580.2.1,prot_S-rigidula_F_contig17937.1.1,prot_S-rigidula_F_contig18387.2.1,prot_S-rigidula_F_contig20341.2.1,prot_S-rigidula_F_contig23574.2.1,prot_S-rigidula_F_contig25647.1.1,prot_S-rigidula_F_contig6123.2.1,prot_S-rigidula_F_contig956…
OG0000059	FALSE	NA	NA	prot_M-pyrifera_M_contig11719.3554.1,prot_M-pyrifera_M_contig15073.6445.1,prot_M-pyrifera_M_contig15567.6596.1,prot_M-pyrifera_M_contig19719.7728.1,prot_M-pyrifera_M_contig29515.9848.1,prot_M-pyrifera_M_contig29549.9854.1,prot_M-pyrifera_M_contig5288.13716.1,prot_M-pyrifera_M_contig59035.14783.1,prot_M-pyrifera_M_contig59350.14819.1,prot_M-pyrifera_M_contig66615.16149.1,prot_M-pyrifera_M_contig67…	prot_M-clavaeformis_F_contig15256.3882.1,prot_M-clavaeformis_F_contig16982.4850.1,prot_M-clavaeformis_F_contig1831.5535.1,prot_M-clavaeformis_F_contig249.8108.1,prot_M-clavaeformis_F_contig2771.9092.1,prot_M-clavaeformis_F_contig6283.16802.1,prot_M-clavaeformis_F_contig9762.21062.1	NA	prot_S-polyschides_M_contig20819.6844.1,prot_S-polyschides_M_contig3606.11517.1,prot_S-polyschides_M_contig6105.15525.1,prot_S-polyschides_M_contig82922.18023.1	prot_S-promiscuus_M_contig10.849.1,prot_S-promiscuus_M_contig15.3389.1,prot_S-promiscuus_M_contig21.6247.1,prot_S-promiscuus_M_contig44.13554.1,prot_S-promiscuus_M_contig47.13912.1,prot_S-promiscuus_M_contig54.15463.1,prot_S-promiscuus_M_contig54.15523.1,prot_S-promiscuus_M_contig66.16893.1,prot_S-promiscuus_M_contig9.18681.1	SJ01393,SJ01889,SJ01890,SJ02094,SJ02163,SJ02733,SJ02828,SJ03016,SJ03068,SJ03894,SJ03926,SJ04680,SJ05100,SJ05103,SJ08001,SJ08002,SJ08435,SJ08486,SJ09891,SJ10506,SJ11519,SJ11520,SJ12838,SJ13290,SJ13551,SJ14477,SJ14719,SJ15234,SJ15538,SJ15616,SJ15952,SJ16009,SJ16017,SJ16210,SJ16660,SJ18194,SJ18815,SJ19053,SJ19526,SJ19528,SJ20575,SJ21499,SJ21865,SJ22271	prot_S-latissima_F_contig142.3062.1,prot_S-latissima_F_contig195.5675.1,prot_S-latissima_F_contig2246.6916.1,prot_S-latissima_F_contig266.8304.1,prot_S-latissima_F_contig46.12057.1,prot_S-latissima_F_contig703.14881.1	NA
OG0000060	FALSE	prot_D-dichotoma_M_contig1008.148.1,prot_D-dichotoma_M_contig1100.887.1,prot_D-dichotoma_M_contig1112.967.1,prot_D-dichotoma_M_contig1131.1114.1,prot_D-dichotoma_M_contig1282.2157.1,prot_D-dichotoma_M_contig1364.2717.1,prot_D-dichotoma_M_contig1477.3425.1,prot_D-dichotoma_M_contig1712.4845.1,prot_D-dichotoma_M_contig1854.5533.1,prot_D-dichotoma_M_contig2250.7545.1,prot_D-dichotoma_M_contig2594.89…	NA	prot_M-pyrifera_M_contig6512.15857.1	NA	NA	NA	prot_S-promiscuus_M_contig10.950.1,prot_S-promiscuus_M_contig16.3753.1,prot_S-promiscuus_M_contig37.11417.1,prot_S-promiscuus_M_contig38.11637.1,prot_S-promiscuus_M_contig43.13305.1,prot_S-promiscuus_M_contig57.15748.1	SJ04473,SJ11905,SJ16202,SJ20178	prot_S-latissima_F_contig1186.1453.1,prot_S-latissima_F_contig184.5255.1	prot_S-rigidula_F_contig10650.1.1,prot_S-rigidula_F_contig11707.1.1,prot_S-rigidula_F_contig11875.1.1,prot_S-rigidula_F_contig13023.3.1,prot_S-rigidula_F_contig13039.1.1,prot_S-rigidula_F_contig145.6.1,prot_S-rigidula_F_contig14847.1.1,prot_S-rigidula_F_contig1521.2.1,prot_S-rigidula_F_contig16722.2.1,prot_S-rigidula_F_contig17140.2.1,prot_S-rigidula_F_contig19303.1.1,prot_S-rigidula_F_contig1944…
OG0000061	FALSE	prot_D-dichotoma_M_contig1537.3791.1,prot_D-dichotoma_M_contig1537.3792.1,prot_D-dichotoma_M_contig17.4758.1,prot_D-dichotoma_M_contig2853.9844.1,prot_D-dichotoma_M_contig3432.11678.1,prot_D-dichotoma_M_contig3432.11679.1,prot_D-dichotoma_M_contig4035.13247.1,prot_D-dichotoma_M_contig423.13728.1,prot_D-dichotoma_M_contig4694.14659.1,prot_D-dichotoma_M_contig541.16023.1,prot_D-dichotoma_M_contig79…	Ec-00_007410.1,Ec-00_010740.1,Ec-02_003530.1,Ec-05_001630.1,Ec-05_001650.1,Ec-05_001660.1,Ec-05_001950.1,Ec-05_001960.1,Ec-05_002540.1,Ec-21_002670.1,Ec-24_004240.1	prot_M-pyrifera_M_contig2575.9073.1,prot_M-pyrifera_M_contig46028.12591.1,prot_M-pyrifera_M_contig47042.12754.1,prot_M-pyrifera_M_contig757.17855.1	prot_M-clavaeformis_F_contig106.614.1,prot_M-clavaeformis_F_contig1763.5188.1,prot_M-clavaeformis_F_contig2299.7402.1,prot_M-clavaeformis_F_contig2500.8166.1,prot_M-clavaeformis_F_contig315.10236.1,prot_M-clavaeformis_F_contig3154.10254.1,prot_M-clavaeformis_F_contig4061.12605.1,prot_M-clavaeformis_F_contig5500.15542.1	prot_P-littoralis_Contig1175.9.1,prot_P-littoralis_Contig247.1.1,prot_P-littoralis_Contig271.29.1,prot_P-littoralis_Contig271.29.10,prot_P-littoralis_Contig271.29.8,prot_P-littoralis_Contig70.32.1	prot_S-polyschides_M_contig10180.180.1,prot_S-polyschides_M_contig14638.3787.1,prot_S-polyschides_M_contig15123.4061.1,prot_S-polyschides_M_contig42101.12731.1,prot_S-polyschides_M_contig4473.13165.1,prot_S-polyschides_M_contig7680.17398.1,prot_S-polyschides_M_contig7937.17634.1	prot_S-promiscuus_M_contig19.4390.1,prot_S-promiscuus_M_contig19.4456.1,prot_S-promiscuus_M_contig19.4457.1,prot_S-promiscuus_M_contig20.5866.1,prot_S-promiscuus_M_contig4.12231.1,prot_S-promiscuus_M_contig49.14152.1,prot_S-promiscuus_M_contig49.14178.1,prot_S-promiscuus_M_contig55.15571.1,prot_S-promiscuus_M_contig64.16825.1	SJ00162,SJ00163,SJ00164,SJ02749,SJ02750,SJ09768,SJ10387,SJ10392,SJ16664,SJ20861,SJ22337	prot_S-latissima_F_contig20.5952.1,prot_S-latissima_F_contig20.5953.1,prot_S-latissima_F_contig2045.6193.1,prot_S-latissima_F_contig3134.9580.1,prot_S-latissima_F_contig407.11252.1,prot_S-latissima_F_contig407.11253.1	prot_S-rigidula_F_contig10399.3.2,prot_S-rigidula_F_contig14246.2.1,prot_S-rigidula_F_contig20604.1.1,prot_S-rigidula_F_contig2205.1.1,prot_S-rigidula_F_contig2444.1.1,prot_S-rigidula_F_contig566.1.1,prot_S-rigidula_F_contig8592.1.1
OG0000062	FALSE	prot_D-dichotoma_M_contig1162.1333.1,prot_D-dichotoma_M_contig1162.1341.1,prot_D-dichotoma_M_contig1162.1344.1,prot_D-dichotoma_M_contig1180.1466.1,prot_D-dichotoma_M_contig1215.1735.1,prot_D-dichotoma_M_contig1647.4483.1,prot_D-dichotoma_M_contig227.7611.1,prot_D-dichotoma_M_contig227.7619.1,prot_D-dichotoma_M_contig227.7622.1,prot_D-dichotoma_M_contig4334.13953.1,prot_D-dichotoma_M_contig4417.1…	Ec-00_005420.1,Ec-07_000470.1,Ec-07_000480.1,Ec-26_005840.1,Ec-26_005870.1,Ec-26_005920.1,Ec-26_006400.1,Ec-26_006490.1	prot_M-pyrifera_M_contig11711.3536.1,prot_M-pyrifera_M_contig13888.6096.1,prot_M-pyrifera_M_contig31291.10207.1,prot_M-pyrifera_M_contig35234.10908.1,prot_M-pyrifera_M_contig37325.11270.1,prot_M-pyrifera_M_contig80032.18770.1,prot_M-pyrifera_M_contig9237.21377.1	prot_M-clavaeformis_F_contig1805.5403.1,prot_M-clavaeformis_F_contig4074.12639.1	prot_P-littoralis_Contig450.5.1,prot_P-littoralis_Contig53.6.1,prot_P-littoralis_Contig64.11.1,prot_P-littoralis_Contig64.36.1,prot_P-littoralis_Contig64.4.1,prot_P-littoralis_Contig808.7.1,prot_P-littoralis_Contig989.8.1	prot_S-polyschides_M_contig1491.3938.1,prot_S-polyschides_M_contig14914.3939.1,prot_S-polyschides_M_contig17244.5270.1,prot_S-polyschides_M_contig19164.6155.1,prot_S-polyschides_M_contig4051.12438.1,prot_S-polyschides_M_contig41590.12638.1,prot_S-polyschides_M_contig47852.13684.1,prot_S-polyschides_M_contig48149.13740.1,prot_S-polyschides_M_contig4815.13744.1,prot_S-polyschides_M_contig8328.18052…	prot_S-promiscuus_M_contig14.3004.1,prot_S-promiscuus_M_contig14.3007.1,prot_S-promiscuus_M_contig14.3015.1,prot_S-promiscuus_M_contig14.3039.1,prot_S-promiscuus_M_contig14.3045.1,prot_S-promiscuus_M_contig14.3090.1,prot_S-promiscuus_M_contig51.15203.1,prot_S-promiscuus_M_contig51.15208.1,prot_S-promiscuus_M_contig51.15214.1	NA	prot_S-latissima_F_contig1142.1185.1,prot_S-latissima_F_contig130.2281.1,prot_S-latissima_F_contig130.2288.1,prot_S-latissima_F_contig186.5302.1,prot_S-latissima_F_contig260.8133.1	prot_S-rigidula_F_contig12286.4.1,prot_S-rigidula_F_contig14499.7.1,prot_S-rigidula_F_contig15501.2.1,prot_S-rigidula_F_contig20142.2.1,prot_S-rigidula_F_contig20275.1.1,prot_S-rigidula_F_contig22456.1.1,prot_S-rigidula_F_contig23954.1.1,prot_S-rigidula_F_contig24543.1.1,prot_S-rigidula_F_contig24704.3.1,prot_S-rigidula_F_contig4634.1.1,prot_S-rigidula_F_contig5046.4.1,prot_S-rigidula_F_contig556…
OG0000063	FALSE	prot_D-dichotoma_M_contig1014.215.1,prot_D-dichotoma_M_contig1042.444.1,prot_D-dichotoma_M_contig1204.1652.1,prot_D-dichotoma_M_contig1214.1726.1,prot_D-dichotoma_M_contig2300.7787.1,prot_D-dichotoma_M_contig243.8327.1,prot_D-dichotoma_M_contig2669.9195.1,prot_D-dichotoma_M_contig329.11305.1,prot_D-dichotoma_M_contig3389.11550.1,prot_D-dichotoma_M_contig3756.12529.1	Ec-20_001660.1	prot_M-pyrifera_M_contig113305.2780.1,prot_M-pyrifera_M_contig54850.14056.1,prot_M-pyrifera_M_contig71044.16956.1,prot_M-pyrifera_M_contig87746.20389.1,prot_M-pyrifera_M_contig92344.21376.1,prot_M-pyrifera_M_contig9409.21716.1	NA	prot_P-littoralis_Contig1035.3.1,prot_P-littoralis_Contig1114.11.1,prot_P-littoralis_Contig118.93.1,prot_P-littoralis_Contig1208.18.1,prot_P-littoralis_Contig1465.3.1,prot_P-littoralis_Contig161.72.1,prot_P-littoralis_Contig161.73.1,prot_P-littoralis_Contig177.71.1,prot_P-littoralis_Contig179.61.1,prot_P-littoralis_Contig204.109.1,prot_P-littoralis_Contig230.26.1,prot_P-littoralis_Contig231.17.1,…	prot_S-polyschides_M_contig34414.11162.1,prot_S-polyschides_M_contig34414.11163.1,prot_S-polyschides_M_contig39790.12276.1,prot_S-polyschides_M_contig44757.13171.1,prot_S-polyschides_M_contig44757.13172.1,prot_S-polyschides_M_contig44757.13173.1,prot_S-polyschides_M_contig93858.19162.1	prot_S-promiscuus_M_contig18.4113.1,prot_S-promiscuus_M_contig37.11396.1,prot_S-promiscuus_M_contig44.13459.1,prot_S-promiscuus_M_contig78.17807.1	SJ07713,SJ21640	NA	prot_S-rigidula_F_contig10675.3.1,prot_S-rigidula_F_contig11125.1.1,prot_S-rigidula_F_contig1209.6.1,prot_S-rigidula_F_contig12843.1.1,prot_S-rigidula_F_contig13354.1.1,prot_S-rigidula_F_contig13354.2.1,prot_S-rigidula_F_contig14447.6.1,prot_S-rigidula_F_contig14895.3.1,prot_S-rigidula_F_contig15367.1.1,prot_S-rigidula_F_contig16693.1.3,prot_S-rigidula_F_contig18058.2.1,prot_S-rigidula_F_contig19…
OG0000064	FALSE	NA	Ec-05_005430.1,Ec-06_002630.1,Ec-06_002780.1,Ec-06_002800.1,Ec-06_009620.1,Ec-10_000370.1,Ec-11_002970.1,Ec-21_000310.1,Ec-24_004330.1,Ec-26_003640.1	prot_M-pyrifera_M_contig16627.6893.1,prot_M-pyrifera_M_contig36961.11215.1,prot_M-pyrifera_M_contig8912.20662.1,prot_M-pyrifera_M_contig9971.22917.1	prot_M-clavaeformis_F_contig15773.4187.1,prot_M-clavaeformis_F_contig16938.4822.1,prot_M-clavaeformis_F_contig16940.4828.1,prot_M-clavaeformis_F_contig3165.10285.1,prot_M-clavaeformis_F_contig3875.12153.1,prot_M-clavaeformis_F_contig5131.14886.1,prot_M-clavaeformis_F_contig6512.17148.1,prot_M-clavaeformis_F_contig6730.17473.1,prot_M-clavaeformis_F_contig8070.19312.1,prot_M-clavaeformis_F_contig85…	prot_P-littoralis_Contig1036.23.1,prot_P-littoralis_Contig1263.18.1,prot_P-littoralis_Contig248.16.1,prot_P-littoralis_Contig270.19.1,prot_P-littoralis_Contig69.153.1,prot_P-littoralis_Contig974.12.1	prot_S-polyschides_M_contig10349.322.1,prot_S-polyschides_M_contig10419.381.1,prot_S-polyschides_M_contig18233.5761.1,prot_S-polyschides_M_contig2500.8539.1,prot_S-polyschides_M_contig4668.13518.1	prot_S-promiscuus_M_contig1.69.1,prot_S-promiscuus_M_contig101.1301.1,prot_S-promiscuus_M_contig63.16794.1,prot_S-promiscuus_M_contig63.16801.1,prot_S-promiscuus_M_contig67.16943.1,prot_S-promiscuus_M_contig68.16953.1	SJ01826,SJ01829,SJ05920,SJ05923,SJ06924,SJ09927,SJ09981,SJ11891,SJ13058,SJ15181,SJ16657,SJ20960,SJ22620	prot_S-latissima_F_contig1224.1736.1,prot_S-latissima_F_contig1224.1737.1,prot_S-latissima_F_contig128.2113.1,prot_S-latissima_F_contig1411.3017.1,prot_S-latissima_F_contig1577.3959.1,prot_S-latissima_F_contig1783.4971.1,prot_S-latissima_F_contig1859.5297.1,prot_S-latissima_F_contig201.6040.1,prot_S-latissima_F_contig2155.6581.1,prot_S-latissima_F_contig2477.7757.1,prot_S-latissima_F_contig2477.7…	prot_S-rigidula_F_contig10051.1.1,prot_S-rigidula_F_contig10251.2.1,prot_S-rigidula_F_contig14041.4.1,prot_S-rigidula_F_contig15055.1.1,prot_S-rigidula_F_contig23613.2.1,prot_S-rigidula_F_contig2500.1.1,prot_S-rigidula_F_contig5635.1.1,prot_S-rigidula_F_contig9891.4.1
OG0000065	FALSE	NA	Ec-00_000780.1,Ec-00_009750.1,Ec-23_003540.1,Ec-23_003550.1,Ec-23_003570.1,Ec-23_003580.1,Ec-23_003590.1	prot_M-pyrifera_M_contig16.6718.1,prot_M-pyrifera_M_contig16.6719.1,prot_M-pyrifera_M_contig16.6720.1,prot_M-pyrifera_M_contig20123.7826.1,prot_M-pyrifera_M_contig2778.9504.1,prot_M-pyrifera_M_contig3530.10915.1,prot_M-pyrifera_M_contig4072.11805.1	prot_M-clavaeformis_F_contig3672.11627.1,prot_M-clavaeformis_F_contig6328.16879.1,prot_M-clavaeformis_F_contig6985.17809.1,prot_M-clavaeformis_F_contig907.20384.1	prot_P-littoralis_Contig1000.7.2,prot_P-littoralis_Contig239.80.1,prot_P-littoralis_Contig720.1.1	prot_S-polyschides_M_contig13251.2863.1,prot_S-polyschides_M_contig16998.5138.1,prot_S-polyschides_M_contig2426.8263.1,prot_S-polyschides_M_contig24760.8455.1,prot_S-polyschides_M_contig28212.9526.1,prot_S-polyschides_M_contig31655.10434.1,prot_S-polyschides_M_contig3771.11841.1,prot_S-polyschides_M_contig42116.12732.1,prot_S-polyschides_M_contig46354.13452.1,prot_S-polyschides_M_contig777.17464.…	prot_S-promiscuus_M_contig16.3446.1,prot_S-promiscuus_M_contig40.12810.1,prot_S-promiscuus_M_contig40.12811.1	SJ08940,SJ08941,SJ08942,SJ08943,SJ08946,SJ08947,SJ08948,SJ11357,SJ11534,SJ11536,SJ12630,SJ12631,SJ12632,SJ12633,SJ12635,SJ12636,SJ12637,SJ12638,SJ12639,SJ12643,SJ12644,SJ12645,SJ12648,SJ12649	prot_S-latissima_F_contig455.12004.1,prot_S-latissima_F_contig455.12005.1,prot_S-latissima_F_contig455.12006.1,prot_S-latissima_F_contig455.12008.1,prot_S-latissima_F_contig455.12009.1,prot_S-latissima_F_contig455.12010.1,prot_S-latissima_F_contig455.12012.1,prot_S-latissima_F_contig455.12013.1,prot_S-latissima_F_contig455.12014.1,prot_S-latissima_F_contig455.12015.1,prot_S-latissima_F_contig455.…	prot_S-rigidula_F_contig13466.1.1,prot_S-rigidula_F_contig6333.1.1
OG0000066	FALSE	prot_D-dichotoma_M_contig1067.612.1,prot_D-dichotoma_M_contig1306.2370.1,prot_D-dichotoma_M_contig1311.2417.1,prot_D-dichotoma_M_contig1356.2674.1,prot_D-dichotoma_M_contig1481.3462.1,prot_D-dichotoma_M_contig1868.5602.1,prot_D-dichotoma_M_contig1879.5646.1,prot_D-dichotoma_M_contig1983.6176.1,prot_D-dichotoma_M_contig2030.6479.1,prot_D-dichotoma_M_contig207.6651.1,prot_D-dichotoma_M_contig207.66…	Ec-00_009860.1,Ec-03_003910.1,Ec-05_003240.1	NA	NA	prot_P-littoralis_Contig12.160.1,prot_P-littoralis_Contig12.162.1,prot_P-littoralis_Contig132.72.1,prot_P-littoralis_Contig162.35.1,prot_P-littoralis_Contig21.127.1,prot_P-littoralis_Contig266.34.1,prot_P-littoralis_Contig266.37.1,prot_P-littoralis_Contig276.75.1,prot_P-littoralis_Contig392.44.1,prot_P-littoralis_Contig439.48.1,prot_P-littoralis_Contig59.11.1,prot_P-littoralis_Contig618.23.1,prot…	prot_S-polyschides_M_contig53320.14462.1,prot_S-polyschides_M_contig58215.15160.1,prot_S-polyschides_M_contig9410.19197.1,prot_S-polyschides_M_contig9410.19198.1	NA	NA	NA	prot_S-rigidula_F_contig12344.1.1,prot_S-rigidula_F_contig12970.1.1,prot_S-rigidula_F_contig13957.1.1,prot_S-rigidula_F_contig14872.1.1,prot_S-rigidula_F_contig16601.1.1,prot_S-rigidula_F_contig1929.3.1,prot_S-rigidula_F_contig19978.1.1,prot_S-rigidula_F_contig23147.1.1,prot_S-rigidula_F_contig23585.1.1,prot_S-rigidula_F_contig26384.1.1,prot_S-rigidula_F_contig26857.1.1,prot_S-rigidula_F_contig37…
OG0000067	FALSE	prot_D-dichotoma_M_contig1598.4144.1	Ec-00_007110.1,Ec-00_009990.1,Ec-00_010260.1,Ec-10_000310.1,Ec-14_002960.1,Ec-22_002240.1,Ec-22_003110.1,Ec-22_003990.1,Ec-26_000060.1	prot_M-pyrifera_M_contig1554.6590.1,prot_M-pyrifera_M_contig51796.13525.1	prot_M-clavaeformis_F_contig1235.2009.1,prot_M-clavaeformis_F_contig15212.3862.1,prot_M-clavaeformis_F_contig168.4751.1,prot_M-clavaeformis_F_contig168.4753.1,prot_M-clavaeformis_F_contig1759.5169.1,prot_M-clavaeformis_F_contig1953.6012.1,prot_M-clavaeformis_F_contig1986.6141.1,prot_M-clavaeformis_F_contig2216.7120.1,prot_M-clavaeformis_F_contig2567.8384.1,prot_M-clavaeformis_F_contig262.8577.1,p…	prot_P-littoralis_Contig1014.5.1,prot_P-littoralis_Contig1176.11.1,prot_P-littoralis_Contig221.91.1,prot_P-littoralis_Contig227.84.1,prot_P-littoralis_Contig241.14.5,prot_P-littoralis_Contig256.1.1,prot_P-littoralis_Contig479.59.3,prot_P-littoralis_Contig555.8.6,prot_P-littoralis_Contig580.23.1,prot_P-littoralis_Contig581.27.1	prot_S-polyschides_M_contig1176.1642.1,prot_S-polyschides_M_contig1229.2141.1,prot_S-polyschides_M_contig13267.2875.1,prot_S-polyschides_M_contig137325.3215.1,prot_S-polyschides_M_contig14134.3500.1,prot_S-polyschides_M_contig1641.4831.1,prot_S-polyschides_M_contig2100.6932.1,prot_S-polyschides_M_contig657.16122.1,prot_S-polyschides_M_contig92026.19005.1	prot_S-promiscuus_M_contig15.3154.1,prot_S-promiscuus_M_contig4.12315.1,prot_S-promiscuus_M_contig64.16815.1,prot_S-promiscuus_M_contig71.17616.1	SJ04487,SJ07384,SJ09813,SJ10526,SJ11307,SJ12127,SJ20101,SJ22416	prot_S-latissima_F_contig25.7852.1,prot_S-latissima_F_contig2532.7953.1,prot_S-latissima_F_contig2721.8488.1,prot_S-latissima_F_contig3623.10507.1,prot_S-latissima_F_contig59.13659.1,prot_S-latissima_F_contig7.14788.1,prot_S-latissima_F_contig731.15182.1,prot_S-latissima_F_contig873.16626.1	NA
OG0000068	FALSE	prot_D-dichotoma_M_contig1626.4374.1,prot_D-dichotoma_M_contig1626.4375.1,prot_D-dichotoma_M_contig1626.4376.1,prot_D-dichotoma_M_contig1626.4377.1,prot_D-dichotoma_M_contig261.9004.1	Ec-04_000980.1,Ec-08_000140.1,Ec-09_004430.1,Ec-11_001810.1	prot_M-pyrifera_M_contig1146.3039.1,prot_M-pyrifera_M_contig48297.12956.1,prot_M-pyrifera_M_contig6.14923.1,prot_M-pyrifera_M_contig6.14924.1,prot_M-pyrifera_M_contig633.15521.1,prot_M-pyrifera_M_contig9225.21355.1	prot_M-clavaeformis_F_contig23.7408.1,prot_M-clavaeformis_F_contig23.7409.1,prot_M-clavaeformis_F_contig830.19551.1	prot_P-littoralis_Contig140.107.2,prot_P-littoralis_Contig205.33.2,prot_P-littoralis_Contig210.62.3,prot_P-littoralis_Contig435.6.1,prot_P-littoralis_Contig807.21.1	prot_S-polyschides_M_contig22568.7645.1,prot_S-polyschides_M_contig23264.7892.1,prot_S-polyschides_M_contig31387.10358.1,prot_S-polyschides_M_contig4027.12395.1	prot_S-promiscuus_M_contig13.2138.1,prot_S-promiscuus_M_contig14.3092.1,prot_S-promiscuus_M_contig34.10646.1	SJ02487,SJ02488,SJ02489,SJ02490,SJ02492,SJ02493,SJ04642,SJ04643,SJ04644,SJ04646,SJ04647,SJ04649,SJ04650,SJ04651,SJ04652,SJ04653,SJ04654,SJ04655,SJ04656,SJ04657,SJ04658,SJ04659,SJ04662,SJ04663,SJ04664,SJ05722,SJ05723,SJ05724,SJ05729,SJ05730,SJ05732,SJ08932,SJ08933,SJ20581	prot_S-latissima_F_contig128.2119.1,prot_S-latissima_F_contig128.2120.1,prot_S-latissima_F_contig149.3491.1,prot_S-latissima_F_contig149.3492.1,prot_S-latissima_F_contig149.3493.1,prot_S-latissima_F_contig149.3494.1,prot_S-latissima_F_contig149.3495.1,prot_S-latissima_F_contig149.3496.1,prot_S-latissima_F_contig149.3497.1,prot_S-latissima_F_contig1957.5712.1,prot_S-latissima_F_contig1957.5713.1,p…	prot_S-rigidula_F_contig8636.1.1
OG0000069	FALSE	prot_D-dichotoma_M_contig1592.4108.1,prot_D-dichotoma_M_contig1592.4109.1,prot_D-dichotoma_M_contig2674.9223.1,prot_D-dichotoma_M_contig3024.10502.1,prot_D-dichotoma_M_contig3024.10503.1,prot_D-dichotoma_M_contig3024.10504.1,prot_D-dichotoma_M_contig3024.10505.1,prot_D-dichotoma_M_contig4576.14448.1,prot_D-dichotoma_M_contig458.14453.1,prot_D-dichotoma_M_contig458.14459.1,prot_D-dichotoma_M_conti…	Ec-06_000450.1,Ec-06_000460.1,Ec-06_000470.1,Ec-06_000490.1,Ec-06_000510.1,Ec-06_000520.1,Ec-06_000530.1,Ec-06_000540.1,Ec-06_000550.1,Ec-06_000570.1,Ec-06_000580.1,Ec-06_000710.1,Ec-06_000730.1,Ec-06_000750.1,Ec-14_006900.1	prot_M-pyrifera_M_contig41638.11941.1,prot_M-pyrifera_M_contig50103.13241.1,prot_M-pyrifera_M_contig6846.16473.1	prot_M-clavaeformis_F_contig147.3526.1,prot_M-clavaeformis_F_contig2419.7873.1,prot_M-clavaeformis_F_contig6333.16888.1,prot_M-clavaeformis_F_contig6738.17478.1,prot_M-clavaeformis_F_contig886.20148.1,prot_M-clavaeformis_F_contig886.20149.1	prot_P-littoralis_Contig146.124.2,prot_P-littoralis_Contig148.16.2,prot_P-littoralis_Contig148.20.1,prot_P-littoralis_Contig148.51.3,prot_P-littoralis_Contig148.56.1	prot_S-polyschides_M_contig17198.5245.1,prot_S-polyschides_M_contig17198.5246.1,prot_S-polyschides_M_contig18099.5697.1,prot_S-polyschides_M_contig28127.9501.1,prot_S-polyschides_M_contig34143.11082.1,prot_S-polyschides_M_contig5437.14597.1,prot_S-polyschides_M_contig7574.17289.1,prot_S-polyschides_M_contig7574.17290.1	prot_S-promiscuus_M_contig3.9501.1,prot_S-promiscuus_M_contig3.9503.1,prot_S-promiscuus_M_contig3.9504.1,prot_S-promiscuus_M_contig3.9517.1,prot_S-promiscuus_M_contig3.9518.1,prot_S-promiscuus_M_contig3.9519.1,prot_S-promiscuus_M_contig3.9520.1,prot_S-promiscuus_M_contig4.11996.1	SJ03248,SJ03251,SJ03252,SJ07165,SJ21045,SJ21046,SJ21048,SJ21050	prot_S-latissima_F_contig1069.581.1,prot_S-latissima_F_contig3480.10246.1,prot_S-latissima_F_contig473.12247.1,prot_S-latissima_F_contig473.12248.1,prot_S-latissima_F_contig473.12249.1,prot_S-latissima_F_contig473.12250.1	prot_S-rigidula_F_contig1201.5.1,prot_S-rigidula_F_contig1307.2.1,prot_S-rigidula_F_contig1307.6.2,prot_S-rigidula_F_contig20825.1.1,prot_S-rigidula_F_contig2979.2.1,prot_S-rigidula_F_contig2979.3.1
OG0000070	FALSE	prot_D-dichotoma_M_contig5.15266.1,prot_D-dichotoma_M_contig5.15268.1	Ec-11_005280.1,Ec-23_000540.1,Ec-23_002990.1	prot_M-pyrifera_M_contig1201.4152.1,prot_M-pyrifera_M_contig13333.5920.1,prot_M-pyrifera_M_contig490.13061.1,prot_M-pyrifera_M_contig942.21748.1	prot_M-clavaeformis_F_contig1450.3400.1,prot_M-clavaeformis_F_contig2255.7252.1,prot_M-clavaeformis_F_contig2307.7437.1,prot_M-clavaeformis_F_contig2871.9394.1,prot_M-clavaeformis_F_contig3006.9804.1,prot_M-clavaeformis_F_contig3230.10470.1,prot_M-clavaeformis_F_contig4890.14362.1,prot_M-clavaeformis_F_contig6251.16769.1,prot_M-clavaeformis_F_contig8026.19268.1,prot_M-clavaeformis_F_contig916.204…	prot_P-littoralis_Contig117.63.1,prot_P-littoralis_Contig1188.1.1,prot_P-littoralis_Contig134.107.1,prot_P-littoralis_Contig25.80.1,prot_P-littoralis_Contig355.43.1	prot_S-polyschides_M_contig1609.4653.1,prot_S-polyschides_M_contig1611.4664.1,prot_S-polyschides_M_contig1730.5293.1,prot_S-polyschides_M_contig3993.12319.1,prot_S-polyschides_M_contig4037.12414.1	prot_S-promiscuus_M_contig10.1040.1,prot_S-promiscuus_M_contig25.7332.1,prot_S-promiscuus_M_contig32.10273.1,prot_S-promiscuus_M_contig39.11805.1	SJ00367,SJ00423,SJ02010,SJ03573,SJ03690,SJ03819,SJ04282,SJ04378,SJ04814,SJ04822,SJ04873,SJ05095,SJ05114,SJ05416,SJ09191,SJ09687,SJ10027,SJ10059,SJ10157,SJ11670,SJ11818,SJ13059,SJ14260,SJ18269,SJ18369,SJ18465,SJ20390,SJ21673,SJ21945,SJ22382	prot_S-latissima_F_contig1230.1794.1,prot_S-latissima_F_contig1504.3579.1,prot_S-latissima_F_contig1659.4387.1,prot_S-latissima_F_contig24.7530.1,prot_S-latissima_F_contig2572.8061.1,prot_S-latissima_F_contig2630.8243.1,prot_S-latissima_F_contig36.10452.1,prot_S-latissima_F_contig41.11276.1,prot_S-latissima_F_contig4254.11545.1,prot_S-latissima_F_contig480.12306.1,prot_S-latissima_F_contig75.1535…	prot_S-rigidula_F_contig792.7.1
OG0000071	FALSE	NA	NA	prot_M-pyrifera_M_contig109440.1980.1	NA	prot_P-littoralis_Contig100.135.1,prot_P-littoralis_Contig1016.4.1,prot_P-littoralis_Contig1040.12.1,prot_P-littoralis_Contig1048.1.1,prot_P-littoralis_Contig11.74.1,prot_P-littoralis_Contig1160.2.1,prot_P-littoralis_Contig1162.11.1,prot_P-littoralis_Contig1291.8.1,prot_P-littoralis_Contig132.10.1,prot_P-littoralis_Contig137.109.1,prot_P-littoralis_Contig1395.5.1,prot_P-littoralis_Contig1408.1.1,…	prot_S-polyschides_M_contig119790.1876.1,prot_S-polyschides_M_contig158.4484.1	NA	SJ01383,SJ03673,SJ03772,SJ07083,SJ07554,SJ10285,SJ15026,SJ15320,SJ17106,SJ18396,SJ22093	NA	prot_S-rigidula_F_contig19189.1.1,prot_S-rigidula_F_contig20624.1.1,prot_S-rigidula_F_contig21553.1.1,prot_S-rigidula_F_contig22447.3.1,prot_S-rigidula_F_contig24234.1.1,prot_S-rigidula_F_contig25320.1.1,prot_S-rigidula_F_contig26038.5.1,prot_S-rigidula_F_contig2999.4.1,prot_S-rigidula_F_contig3748.2.1,prot_S-rigidula_F_contig7676.1.1
OG0000072	FALSE	prot_D-dichotoma_M_contig1162.1351.1,prot_D-dichotoma_M_contig1174.1420.1,prot_D-dichotoma_M_contig15.3576.1,prot_D-dichotoma_M_contig1583.4046.1,prot_D-dichotoma_M_contig1672.4629.1,prot_D-dichotoma_M_contig1677.4644.1,prot_D-dichotoma_M_contig1997.6238.1,prot_D-dichotoma_M_contig2006.6344.1,prot_D-dichotoma_M_contig2205.7366.1,prot_D-dichotoma_M_contig224.7500.1,prot_D-dichotoma_M_contig2330.79…	NA	NA	prot_M-clavaeformis_F_contig13336.2671.1,prot_M-clavaeformis_F_contig13893.3020.1,prot_M-clavaeformis_F_contig4732.14040.1	prot_P-littoralis_Contig103.91.1,prot_P-littoralis_Contig120.38.1,prot_P-littoralis_Contig1316.8.1,prot_P-littoralis_Contig1379.2.1,prot_P-littoralis_Contig1427.7.1,prot_P-littoralis_Contig164.72.1,prot_P-littoralis_Contig267.41.1,prot_P-littoralis_Contig315.41.1,prot_P-littoralis_Contig316.7.1,prot_P-littoralis_Contig316.8.1,prot_P-littoralis_Contig367.65.1,prot_P-littoralis_Contig367.66.1,prot_…	NA	prot_S-promiscuus_M_contig87.18596.1,prot_S-promiscuus_M_contig87.18597.1,prot_S-promiscuus_M_contig9.18727.1	SJ06963,SJ12701,SJ14878,SJ14879	prot_S-latissima_F_contig1343.2555.1	NA
OG0000073	FALSE	prot_D-dichotoma_M_contig100.101.1,prot_D-dichotoma_M_contig1284.2173.1,prot_D-dichotoma_M_contig1326.2505.1,prot_D-dichotoma_M_contig1366.2724.1,prot_D-dichotoma_M_contig1372.2761.1,prot_D-dichotoma_M_contig1527.3737.1,prot_D-dichotoma_M_contig2151.7124.1,prot_D-dichotoma_M_contig2211.7396.1,prot_D-dichotoma_M_contig2454.8415.1,prot_D-dichotoma_M_contig257.8839.1,prot_D-dichotoma_M_contig2646.91…	Ec-00_003800.1	prot_M-pyrifera_M_contig24465.8818.1,prot_M-pyrifera_M_contig46172.12610.1	prot_M-clavaeformis_F_contig4319.13165.1,prot_M-clavaeformis_F_contig4751.14082.1	prot_P-littoralis_Contig1044.23.3,prot_P-littoralis_Contig1067.1.1,prot_P-littoralis_Contig1067.3.1,prot_P-littoralis_Contig1087.7.1,prot_P-littoralis_Contig11.166.1,prot_P-littoralis_Contig117.143.2,prot_P-littoralis_Contig1356.6.1,prot_P-littoralis_Contig1358.11.3,prot_P-littoralis_Contig150.93.1,prot_P-littoralis_Contig155.11.1,prot_P-littoralis_Contig1556.3.1,prot_P-littoralis_Contig164.104.1…	NA	prot_S-promiscuus_M_contig12.2001.1,prot_S-promiscuus_M_contig17.4017.1,prot_S-promiscuus_M_contig17.4018.1	SJ04133	prot_S-latissima_F_contig121.1634.1,prot_S-latissima_F_contig656.14329.1	NA
OG0000074	FALSE	prot_D-dichotoma_M_contig140.2983.1,prot_D-dichotoma_M_contig230.7777.1	Ec-02_002260.1,Ec-02_002530.1,Ec-02_002590.1,Ec-02_002600.1,Ec-03_002080.1,Ec-03_003720.1,Ec-sdr_f_000050.1	prot_M-pyrifera_M_contig2812.9569.1	prot_M-clavaeformis_F_contig134.2710.1,prot_M-clavaeformis_F_contig2362.7647.1,prot_M-clavaeformis_F_contig285.9342.1,prot_M-clavaeformis_F_contig2934.9576.1,prot_M-clavaeformis_F_contig2934.9577.1,prot_M-clavaeformis_F_contig3817.12017.1	prot_P-littoralis_Contig1166.14.1,prot_P-littoralis_Contig370.21.1	prot_S-polyschides_M_contig15197.4101.1,prot_S-polyschides_M_contig1787.5564.1,prot_S-polyschides_M_contig2286.7762.1	prot_S-promiscuus_M_contig21.6077.1,prot_S-promiscuus_M_contig21.6078.1,prot_S-promiscuus_M_contig21.6079.1,prot_S-promiscuus_M_contig21.6080.1,prot_S-promiscuus_M_contig27.7963.1,prot_S-promiscuus_M_contig30.9710.1,prot_S-promiscuus_M_contig31.9930.1,prot_S-promiscuus_M_contig55.15579.1,prot_S-promiscuus_M_contig55.15583.1,prot_S-promiscuus_M_contig55.15585.1,prot_S-promiscuus_M_contig55.15591.1…	SJ09398,SJ09399,SJ09401,SJ09403,SJ09404,SJ09407,SJ13053,SJ13054,SJ13066,SJ18045,SJ18048,SJ18049,SJ18050,SJ19922,SJ20417	prot_S-latissima_F_contig1317.2408.1,prot_S-latissima_F_contig543.13155.1,prot_S-latissima_F_contig543.13156.1,prot_S-latissima_F_contig543.13157.1,prot_S-latissima_F_contig76.15446.1	prot_S-rigidula_F_contig13148.2.1,prot_S-rigidula_F_contig14517.1.1,prot_S-rigidula_F_contig18568.2.1,prot_S-rigidula_F_contig20281.3.1,prot_S-rigidula_F_contig20281.4.1,prot_S-rigidula_F_contig2284.1.1,prot_S-rigidula_F_contig3042.1.1,prot_S-rigidula_F_contig3861.2.1,prot_S-rigidula_F_contig6985.1.1,prot_S-rigidula_F_contig8244.1.1,prot_S-rigidula_F_contig9297.1.1
OG0000075	FALSE	NA	Ec-05_000750.1,Ec-26_000070.1	prot_M-pyrifera_M_contig25891.9104.1,prot_M-pyrifera_M_contig28511.9645.1,prot_M-pyrifera_M_contig4459.12383.1,prot_M-pyrifera_M_contig93866.21674.1,prot_M-pyrifera_M_contig9733.22418.1	prot_M-clavaeformis_F_contig11886.1652.1,prot_M-clavaeformis_F_contig12879.2367.1,prot_M-clavaeformis_F_contig13047.2491.1,prot_M-clavaeformis_F_contig13487.2755.1,prot_M-clavaeformis_F_contig14051.3130.1,prot_M-clavaeformis_F_contig17670.5199.1,prot_M-clavaeformis_F_contig3376.10856.1,prot_M-clavaeformis_F_contig4750.14081.1,prot_M-clavaeformis_F_contig5937.16246.1	prot_P-littoralis_Contig1013.7.1,prot_P-littoralis_Contig1224.5.1,prot_P-littoralis_Contig1483.1.1,prot_P-littoralis_Contig1630.3.1,prot_P-littoralis_Contig350.10.1,prot_P-littoralis_Contig478.1.1,prot_P-littoralis_Contig492.52.1,prot_P-littoralis_Contig800.13.1,prot_P-littoralis_Contig993.14.1	prot_S-polyschides_M_contig10399.363.1,prot_S-polyschides_M_contig17650.5466.1,prot_S-polyschides_M_contig28309.9558.1,prot_S-polyschides_M_contig4723.13607.1,prot_S-polyschides_M_contig53569.14492.1,prot_S-polyschides_M_contig5542.14759.1,prot_S-polyschides_M_contig80402.17757.1	prot_S-promiscuus_M_contig4.12560.1	SJ01201,SJ02344,SJ02690,SJ03030,SJ05042,SJ05384,SJ05671,SJ05997,SJ06039,SJ06084,SJ06748,SJ06749,SJ06934,SJ07091,SJ07636,SJ07950,SJ08076,SJ11223,SJ12285,SJ14106,SJ14340,SJ14484,SJ14610,SJ16453,SJ16552,SJ16665,SJ17605,SJ18723,SJ18783,SJ19485,SJ19786,SJ21775	prot_S-latissima_F_contig1565.3910.1,prot_S-latissima_F_contig224.6898.1,prot_S-latissima_F_contig729.15160.1	prot_S-rigidula_F_contig12965.1.1,prot_S-rigidula_F_contig18284.1.1,prot_S-rigidula_F_contig19957.2.1,prot_S-rigidula_F_contig22273.3.1,prot_S-rigidula_F_contig22273.4.1,prot_S-rigidula_F_contig3823.1.1,prot_S-rigidula_F_contig6089.1.1
OG0000076	FALSE	prot_D-dichotoma_M_contig1207.1670.1,prot_D-dichotoma_M_contig1207.1671.1,prot_D-dichotoma_M_contig1880.5664.1,prot_D-dichotoma_M_contig1903.5786.1,prot_D-dichotoma_M_contig3210.11096.1,prot_D-dichotoma_M_contig712.18031.1	Ec-05_000300.1,Ec-11_001210.1	prot_M-pyrifera_M_contig104399.943.1,prot_M-pyrifera_M_contig69195.16612.1,prot_M-pyrifera_M_contig76949.18136.1	NA	prot_P-littoralis_Contig1120.7.1,prot_P-littoralis_Contig132.91.1,prot_P-littoralis_Contig1423.2.1,prot_P-littoralis_Contig1423.3.1,prot_P-littoralis_Contig186.21.1,prot_P-littoralis_Contig186.22.1,prot_P-littoralis_Contig194.71.2,prot_P-littoralis_Contig215.17.1,prot_P-littoralis_Contig258.10.1,prot_P-littoralis_Contig271.23.1,prot_P-littoralis_Contig300.76.1,prot_P-littoralis_Contig300.78.1,pro…	prot_S-polyschides_M_contig1732.5298.1,prot_S-polyschides_M_contig70977.16769.1,prot_S-polyschides_M_contig95959.19380.1	prot_S-promiscuus_M_contig16.3768.1,prot_S-promiscuus_M_contig20.5700.1	SJ10174	NA	prot_S-rigidula_F_contig10138.2.1,prot_S-rigidula_F_contig10747.1.1,prot_S-rigidula_F_contig10931.1.1,prot_S-rigidula_F_contig11858.3.1,prot_S-rigidula_F_contig12475.1.1,prot_S-rigidula_F_contig12986.3.1,prot_S-rigidula_F_contig13033.1.1,prot_S-rigidula_F_contig13037.3.1,prot_S-rigidula_F_contig13037.4.1,prot_S-rigidula_F_contig16589.4.1,prot_S-rigidula_F_contig17056.1.1,prot_S-rigidula_F_contig1…
OG0000077	FALSE	prot_D-dichotoma_M_contig1062.592.1,prot_D-dichotoma_M_contig1280.2145.1,prot_D-dichotoma_M_contig1453.3321.1,prot_D-dichotoma_M_contig1545.3842.1,prot_D-dichotoma_M_contig1606.4234.1,prot_D-dichotoma_M_contig167.4627.1,prot_D-dichotoma_M_contig1681.4673.1,prot_D-dichotoma_M_contig1956.6035.1,prot_D-dichotoma_M_contig1961.6067.1,prot_D-dichotoma_M_contig2036.6500.1,prot_D-dichotoma_M_contig206.66…	NA	prot_M-pyrifera_M_contig15237.6496.1,prot_M-pyrifera_M_contig8594.20034.1	prot_M-clavaeformis_F_contig8470.19741.1,prot_M-clavaeformis_F_contig9041.20359.1	prot_P-littoralis_Contig1213.2.1,prot_P-littoralis_Contig637.1.1	prot_S-polyschides_M_contig82462.17985.1,prot_S-polyschides_M_contig9989.19734.1	prot_S-promiscuus_M_contig53.15437.1	NA	prot_S-latissima_F_contig1032.290.1	prot_S-rigidula_F_contig10614.1.1,prot_S-rigidula_F_contig13358.1.1,prot_S-rigidula_F_contig14583.1.1,prot_S-rigidula_F_contig14641.1.1,prot_S-rigidula_F_contig15112.3.1,prot_S-rigidula_F_contig17453.2.1,prot_S-rigidula_F_contig18265.2.1,prot_S-rigidula_F_contig19869.2.1,prot_S-rigidula_F_contig20873.1.1,prot_S-rigidula_F_contig21154.1.1,prot_S-rigidula_F_contig21744.1.1,prot_S-rigidula_F_contig2…
OG0000078	FALSE	prot_D-dichotoma_M_contig1162.1336.1,prot_D-dichotoma_M_contig1162.1342.1,prot_D-dichotoma_M_contig1162.1349.1,prot_D-dichotoma_M_contig1215.1737.1,prot_D-dichotoma_M_contig15.3580.1,prot_D-dichotoma_M_contig1924.5885.1,prot_D-dichotoma_M_contig227.7621.1,prot_D-dichotoma_M_contig227.7624.1,prot_D-dichotoma_M_contig3436.11682.1,prot_D-dichotoma_M_contig4417.14112.1,prot_D-dichotoma_M_contig541.16…	Ec-00_005460.1,Ec-04_005020.1,Ec-07_000510.1,Ec-26_005850.1,Ec-26_005910.1,Ec-26_006360.1,Ec-26_006460.1	prot_M-pyrifera_M_contig19854.7758.1,prot_M-pyrifera_M_contig21405.8124.1,prot_M-pyrifera_M_contig3297.10520.1,prot_M-pyrifera_M_contig36386.11107.1,prot_M-pyrifera_M_contig8200.19187.1	prot_M-clavaeformis_F_contig10743.734.1,prot_M-clavaeformis_F_contig11265.1199.1,prot_M-clavaeformis_F_contig1187.1639.1,prot_M-clavaeformis_F_contig3002.9794.1,prot_M-clavaeformis_F_contig8269.19513.1	prot_P-littoralis_Contig184.3.1,prot_P-littoralis_Contig444.71.1,prot_P-littoralis_Contig64.1.1,prot_P-littoralis_Contig64.171.1,prot_P-littoralis_Contig64.30.1,prot_P-littoralis_Contig64.8.1,prot_P-littoralis_Contig808.31.1,prot_P-littoralis_Contig808.5.1	prot_S-polyschides_M_contig114988.1388.1,prot_S-polyschides_M_contig15691.4431.1,prot_S-polyschides_M_contig24637.8408.1,prot_S-polyschides_M_contig26373.8972.1,prot_S-polyschides_M_contig27994.9467.1,prot_S-polyschides_M_contig28122.9500.1,prot_S-polyschides_M_contig36124.11525.1,prot_S-polyschides_M_contig36547.11592.1,prot_S-polyschides_M_contig37148.11727.1,prot_S-polyschides_M_contig6372.158…	prot_S-promiscuus_M_contig14.2969.1,prot_S-promiscuus_M_contig14.3006.1,prot_S-promiscuus_M_contig14.3011.1,prot_S-promiscuus_M_contig14.3036.1,prot_S-promiscuus_M_contig14.3043.1,prot_S-promiscuus_M_contig14.3086.1,prot_S-promiscuus_M_contig51.15202.1,prot_S-promiscuus_M_contig51.15206.1,prot_S-promiscuus_M_contig51.15212.1,prot_S-promiscuus_M_contig6.16211.1	NA	prot_S-latissima_F_contig1142.1186.1,prot_S-latissima_F_contig130.2284.1,prot_S-latissima_F_contig130.2290.1,prot_S-latissima_F_contig186.5305.1,prot_S-latissima_F_contig260.8135.1,prot_S-latissima_F_contig260.8137.1	prot_S-rigidula_F_contig10839.1.1,prot_S-rigidula_F_contig11788.2.1,prot_S-rigidula_F_contig14458.2.1,prot_S-rigidula_F_contig1516.3.1,prot_S-rigidula_F_contig16580.1.1,prot_S-rigidula_F_contig18387.1.1,prot_S-rigidula_F_contig20341.1.1,prot_S-rigidula_F_contig23574.1.1,prot_S-rigidula_F_contig956.2.1
OG0000079	FALSE	prot_D-dichotoma_M_contig1220.1774.1,prot_D-dichotoma_M_contig2221.7421.1,prot_D-dichotoma_M_contig2221.7422.1,prot_D-dichotoma_M_contig534.15910.1,prot_D-dichotoma_M_contig755.18393.1,prot_D-dichotoma_M_contig80.18866.1	Ec-02_000480.1,Ec-02_000510.1,Ec-02_003170.1,Ec-05_003370.1,Ec-07_005990.1,Ec-10_003800.1,Ec-12_000440.1,Ec-27_004940.1	prot_M-pyrifera_M_contig2117.8064.1,prot_M-pyrifera_M_contig48882.13042.1,prot_M-pyrifera_M_contig8334.19463.1,prot_M-pyrifera_M_contig981.22590.1	prot_M-clavaeformis_F_contig1504.3756.1,prot_M-clavaeformis_F_contig2207.7092.1,prot_M-clavaeformis_F_contig362.11484.1,prot_M-clavaeformis_F_contig398.12398.1	prot_P-littoralis_Contig102.29.13,prot_P-littoralis_Contig36.103.1,prot_P-littoralis_Contig36.105.8,prot_P-littoralis_Contig36.86.6,prot_P-littoralis_Contig706.28.3,prot_P-littoralis_Contig706.38.7	prot_S-polyschides_M_contig1031.289.1,prot_S-polyschides_M_contig10380.346.1,prot_S-polyschides_M_contig1045.414.1,prot_S-polyschides_M_contig1283.2567.1,prot_S-polyschides_M_contig13615.3134.1,prot_S-polyschides_M_contig16416.4838.1,prot_S-polyschides_M_contig2229.7537.1,prot_S-polyschides_M_contig2446.8342.1,prot_S-polyschides_M_contig2446.8343.1,prot_S-polyschides_M_contig2588.8817.1,prot_S-po…	prot_S-promiscuus_M_contig13.2376.1,prot_S-promiscuus_M_contig17.3824.1,prot_S-promiscuus_M_contig46.13796.1,prot_S-promiscuus_M_contig46.13806.1,prot_S-promiscuus_M_contig46.13807.1,prot_S-promiscuus_M_contig46.13808.1,prot_S-promiscuus_M_contig9.18856.1,prot_S-promiscuus_M_contig9.18877.1,prot_S-promiscuus_M_contig9.18884.1	SJ01075,SJ02532,SJ02571,SJ03217,SJ03218,SJ04093,SJ04923,SJ07053,SJ07055,SJ15786,SJ15788,SJ17371,SJ17372	prot_S-latissima_F_contig362.10501.1,prot_S-latissima_F_contig617.13981.1,prot_S-latissima_F_contig911.16919.1	prot_S-rigidula_F_contig1065.1.1,prot_S-rigidula_F_contig17584.1.2,prot_S-rigidula_F_contig3192.1.1
OG0000080	FALSE	prot_D-dichotoma_M_contig2032.6490.1,prot_D-dichotoma_M_contig206.6597.1,prot_D-dichotoma_M_contig2173.7209.1,prot_D-dichotoma_M_contig3412.11637.1,prot_D-dichotoma_M_contig822.19046.1	Ec-03_002910.1,Ec-21_004900.1	prot_M-pyrifera_M_contig142.6206.1	NA	prot_P-littoralis_Contig16.89.17,prot_P-littoralis_Contig532.11.6	prot_S-polyschides_M_contig10733.659.1,prot_S-polyschides_M_contig11038.936.1,prot_S-polyschides_M_contig18548.5906.1,prot_S-polyschides_M_contig3923.12174.1,prot_S-polyschides_M_contig6563.16116.1	prot_S-promiscuus_M_contig19.4365.1	SJ00091,SJ00092,SJ01044,SJ01045,SJ01969,SJ01973,SJ04497,SJ04831,SJ04832,SJ04833,SJ07261,SJ07263,SJ07264,SJ07471,SJ07634,SJ07635,SJ09975,SJ10341,SJ13542,SJ13544,SJ13545,SJ13547,SJ13548,SJ18703,SJ18706,SJ18710,SJ19178,SJ19213,SJ19215,SJ19216,SJ22236,SJ22238,SJ22374,SJ22375,SJ22439,SJ22441,SJ22467	prot_S-latissima_F_contig1063.537.1,prot_S-latissima_F_contig1635.4289.1,prot_S-latissima_F_contig1727.4736.1,prot_S-latissima_F_contig2220.6849.1,prot_S-latissima_F_contig2367.7416.1,prot_S-latissima_F_contig2367.7417.1,prot_S-latissima_F_contig35.10266.1,prot_S-latissima_F_contig35.10267.1,prot_S-latissima_F_contig35.10269.1,prot_S-latissima_F_contig35.10270.1,prot_S-latissima_F_contig35.10271.…	NA
OG0000081	FALSE	prot_D-dichotoma_M_contig106.562.1,prot_D-dichotoma_M_contig1221.1781.1,prot_D-dichotoma_M_contig1243.1917.1,prot_D-dichotoma_M_contig1330.2547.1,prot_D-dichotoma_M_contig1412.3057.1,prot_D-dichotoma_M_contig15.3572.1,prot_D-dichotoma_M_contig15.3579.1,prot_D-dichotoma_M_contig2048.6547.1,prot_D-dichotoma_M_contig2201.7349.1,prot_D-dichotoma_M_contig2246.7522.1,prot_D-dichotoma_M_contig2464.8459.…	Ec-19_003020.1,Ec-19_003030.1	NA	prot_M-clavaeformis_F_contig4338.13204.1,prot_M-clavaeformis_F_contig8406.19670.1	prot_P-littoralis_Contig116.73.2,prot_P-littoralis_Contig320.8.2,prot_P-littoralis_Contig45.23.4,prot_P-littoralis_Contig45.23.6	prot_S-polyschides_M_contig24288.8274.1,prot_S-polyschides_M_contig4385.13006.1,prot_S-polyschides_M_contig87073.18458.1,prot_S-polyschides_M_contig87724.18526.1	prot_S-promiscuus_M_contig12.2114.1,prot_S-promiscuus_M_contig4.12361.1,prot_S-promiscuus_M_contig64.16821.1,prot_S-promiscuus_M_contig87.18604.1	SJ22564	prot_S-latissima_F_contig1202.1611.1,prot_S-latissima_F_contig2524.7925.1	prot_S-rigidula_F_contig11077.1.1,prot_S-rigidula_F_contig13372.1.1,prot_S-rigidula_F_contig13566.1.1,prot_S-rigidula_F_contig14964.1.1,prot_S-rigidula_F_contig18764.1.1,prot_S-rigidula_F_contig18851.3.1,prot_S-rigidula_F_contig2056.3.1,prot_S-rigidula_F_contig20620.1.1,prot_S-rigidula_F_contig22928.1.1,prot_S-rigidula_F_contig24549.1.1,prot_S-rigidula_F_contig26170.1.1,prot_S-rigidula_F_contig26…
OG0000082	FALSE	prot_D-dichotoma_M_contig2177.7222.1,prot_D-dichotoma_M_contig2542.8746.1,prot_D-dichotoma_M_contig412.13460.1,prot_D-dichotoma_M_contig459.14471.1,prot_D-dichotoma_M_contig459.14472.1,prot_D-dichotoma_M_contig459.14473.1,prot_D-dichotoma_M_contig633.17270.1,prot_D-dichotoma_M_contig867.19428.1	Ec-08_000860.1,Ec-08_000900.1,Ec-08_000910.1,Ec-08_000930.1,Ec-08_000940.1	prot_M-pyrifera_M_contig10.4.1,prot_M-pyrifera_M_contig500.13227.1,prot_M-pyrifera_M_contig8326.19448.1	prot_M-clavaeformis_F_contig1651.4604.1,prot_M-clavaeformis_F_contig3572.11362.1,prot_M-clavaeformis_F_contig5577.15653.1	prot_P-littoralis_Contig1026.4.28,prot_P-littoralis_Contig19.135.1	prot_S-polyschides_M_contig11362.1265.1,prot_S-polyschides_M_contig27538.9336.1	prot_S-promiscuus_M_contig22.6568.1,prot_S-promiscuus_M_contig22.6569.1,prot_S-promiscuus_M_contig22.6572.1,prot_S-promiscuus_M_contig22.6573.1,prot_S-promiscuus_M_contig22.6579.1	SJ00098,SJ01094,SJ01099,SJ01120,SJ01132,SJ02861,SJ06527,SJ07022,SJ07024,SJ08324,SJ08325,SJ09102,SJ09544,SJ14344,SJ14346,SJ14348,SJ14352,SJ14356,SJ14358,SJ14359,SJ15326,SJ16306,SJ16310,SJ16314,SJ16315,SJ16318,SJ17853,SJ20829,SJ20831,SJ20833,SJ20835,SJ20837	prot_S-latissima_F_contig1588.4016.1,prot_S-latissima_F_contig1596.4071.1,prot_S-latissima_F_contig164.4307.1,prot_S-latissima_F_contig173.4747.1,prot_S-latissima_F_contig211.6446.1,prot_S-latissima_F_contig2212.6828.1,prot_S-latissima_F_contig281.8772.1,prot_S-latissima_F_contig355.10364.1,prot_S-latissima_F_contig355.10367.1,prot_S-latissima_F_contig355.10368.1,prot_S-latissima_F_contig355.1037…	prot_S-rigidula_F_contig12787.1.5
OG0000083	FALSE	NA	NA	prot_M-pyrifera_M_contig105025.1082.1,prot_M-pyrifera_M_contig106707.1445.1,prot_M-pyrifera_M_contig10878.1847.1,prot_M-pyrifera_M_contig121891.4503.1,prot_M-pyrifera_M_contig15437.6563.1,prot_M-pyrifera_M_contig22107.8287.1,prot_M-pyrifera_M_contig26184.9173.1,prot_M-pyrifera_M_contig301.9965.1,prot_M-pyrifera_M_contig31668.10271.1,prot_M-pyrifera_M_contig46617.12677.1,prot_M-pyrifera_M_contig48…	prot_M-clavaeformis_F_contig11177.1121.1,prot_M-clavaeformis_F_contig9572.20885.1	prot_P-littoralis_Contig1.94.1,prot_P-littoralis_Contig11.70.1,prot_P-littoralis_Contig1167.17.1,prot_P-littoralis_Contig1205.4.1,prot_P-littoralis_Contig229.94.1,prot_P-littoralis_Contig252.1.1,prot_P-littoralis_Contig33.49.1,prot_P-littoralis_Contig364.17.1,prot_P-littoralis_Contig37.25.1,prot_P-littoralis_Contig371.19.1,prot_P-littoralis_Contig404.59.1,prot_P-littoralis_Contig417.51.1,prot_P-l…	prot_S-polyschides_M_contig31183.10314.1,prot_S-polyschides_M_contig66089.16181.1	prot_S-promiscuus_M_contig37.11418.1,prot_S-promiscuus_M_contig9.19127.1	SJ01118,SJ03547,SJ03933,SJ04488,SJ05970,SJ06020,SJ06045,SJ07858,SJ11119,SJ11221,SJ11530,SJ12199,SJ17103,SJ19055,SJ21303,SJ22170	prot_S-latissima_F_contig1067.560.1,prot_S-latissima_F_contig1453.3308.1,prot_S-latissima_F_contig150.3564.1,prot_S-latissima_F_contig2536.7965.1,prot_S-latissima_F_contig27.8395.1,prot_S-latissima_F_contig317.9658.1,prot_S-latissima_F_contig3981.11075.1,prot_S-latissima_F_contig616.13976.1	NA
OG0000084	FALSE	prot_D-dichotoma_M_contig1007.143.1,prot_D-dichotoma_M_contig1007.145.1,prot_D-dichotoma_M_contig1141.1184.1,prot_D-dichotoma_M_contig1372.2758.1,prot_D-dichotoma_M_contig420.13659.1,prot_D-dichotoma_M_contig420.13660.1,prot_D-dichotoma_M_contig484.14964.1	Ec-00_001800.1,Ec-00_001810.1,Ec-00_001850.1,Ec-00_001860.1,Ec-00_010390.1,Ec-17_002750.1	prot_M-pyrifera_M_contig83450.19490.1	prot_M-clavaeformis_F_contig1133.1257.1,prot_M-clavaeformis_F_contig168.4752.1,prot_M-clavaeformis_F_contig1872.5686.1,prot_M-clavaeformis_F_contig1872.5687.1,prot_M-clavaeformis_F_contig28.9182.1,prot_M-clavaeformis_F_contig2915.9527.1,prot_M-clavaeformis_F_contig2916.9529.1,prot_M-clavaeformis_F_contig576.15939.1,prot_M-clavaeformis_F_contig7501.18613.1	prot_P-littoralis_Contig354.19.2	prot_S-polyschides_M_contig16714.4993.1,prot_S-polyschides_M_contig19494.6293.1,prot_S-polyschides_M_contig2834.9564.1,prot_S-polyschides_M_contig4030.12404.1,prot_S-polyschides_M_contig5591.14819.1,prot_S-polyschides_M_contig5623.14874.1	prot_S-promiscuus_M_contig1.429.1,prot_S-promiscuus_M_contig37.11489.1	SJ00746,SJ00747,SJ00748,SJ00749,SJ00750,SJ04260,SJ04261,SJ04679,SJ04682,SJ08434,SJ09297,SJ12538,SJ12541,SJ12544,SJ18997,SJ19066,SJ19067,SJ19068,SJ19074,SJ19075,SJ19077,SJ19078,SJ19079,SJ19080,SJ19081,SJ19082,SJ19128,SJ19668,SJ19671,SJ19676,SJ19677,SJ19682,SJ19684,SJ21427,SJ21429	prot_S-latissima_F_contig1981.5843.1,prot_S-latissima_F_contig256.8035.1,prot_S-latissima_F_contig302.9309.1	prot_S-rigidula_F_contig3411.1.2
OG0000085	FALSE	prot_D-dichotoma_M_contig1112.962.1,prot_D-dichotoma_M_contig1112.963.1,prot_D-dichotoma_M_contig1870.5621.1,prot_D-dichotoma_M_contig1877.5638.1,prot_D-dichotoma_M_contig1904.5789.1,prot_D-dichotoma_M_contig1951.6020.1,prot_D-dichotoma_M_contig2093.6807.1,prot_D-dichotoma_M_contig2093.6808.1,prot_D-dichotoma_M_contig3127.10814.1,prot_D-dichotoma_M_contig54.16010.1,prot_D-dichotoma_M_contig54.160…	Ec-00_008930.1,Ec-05_006630.1,Ec-05_006640.1,Ec-09_004400.1,Ec-21_001320.1,Ec-21_001340.1,Ec-21_001350.1,Ec-21_001360.1,Ec-21_003880.1,Ec-22_003520.1	NA	prot_M-clavaeformis_F_contig1183.1621.1,prot_M-clavaeformis_F_contig1183.1622.1,prot_M-clavaeformis_F_contig1942.5967.1,prot_M-clavaeformis_F_contig1995.6179.1,prot_M-clavaeformis_F_contig2166.6930.1,prot_M-clavaeformis_F_contig3021.9850.1,prot_M-clavaeformis_F_contig344.11035.1,prot_M-clavaeformis_F_contig3456.11079.1,prot_M-clavaeformis_F_contig628.16795.1,prot_M-clavaeformis_F_contig81.19340.1	prot_P-littoralis_Contig1442.3.2,prot_P-littoralis_Contig1442.5.1,prot_P-littoralis_Contig284.22.12,prot_P-littoralis_Contig42.165.4,prot_P-littoralis_Contig530.1.2,prot_P-littoralis_Contig530.2.2,prot_P-littoralis_Contig530.5.1,prot_P-littoralis_Contig530.7.1,prot_P-littoralis_Contig530.9.1	prot_S-polyschides_M_contig1278.2524.1,prot_S-polyschides_M_contig1705.5154.1,prot_S-polyschides_M_contig2445.8337.1,prot_S-polyschides_M_contig2445.8338.1,prot_S-polyschides_M_contig263.8956.1,prot_S-polyschides_M_contig263.8957.1,prot_S-polyschides_M_contig263.8958.1,prot_S-polyschides_M_contig447.13159.1	prot_S-promiscuus_M_contig32.10285.1,prot_S-promiscuus_M_contig32.10286.1,prot_S-promiscuus_M_contig32.10287.1,prot_S-promiscuus_M_contig32.10288.1,prot_S-promiscuus_M_contig32.10290.1,prot_S-promiscuus_M_contig32.10291.1,prot_S-promiscuus_M_contig32.10293.1,prot_S-promiscuus_M_contig32.10294.1,prot_S-promiscuus_M_contig32.10295.1,prot_S-promiscuus_M_contig4.11978.1,prot_S-promiscuus_M_contig56.1…	NA	NA	prot_S-rigidula_F_contig10835.1.1,prot_S-rigidula_F_contig1341.1.2,prot_S-rigidula_F_contig3008.1.1,prot_S-rigidula_F_contig3462.1.5,prot_S-rigidula_F_contig4023.2.1,prot_S-rigidula_F_contig5541.1.1,prot_S-rigidula_F_contig5541.2.1,prot_S-rigidula_F_contig669.1.1
OG0000086	FALSE	prot_D-dichotoma_M_contig1740.4992.1,prot_D-dichotoma_M_contig2287.7695.1,prot_D-dichotoma_M_contig2287.7696.1,prot_D-dichotoma_M_contig2287.7697.1,prot_D-dichotoma_M_contig459.14480.1	Ec-08_000220.1,Ec-08_000230.1,Ec-08_000840.1,Ec-08_000850.1,Ec-08_000950.1,Ec-08_001780.1,Ec-08_001790.1,Ec-08_001800.1,Ec-08_001810.1,Ec-08_001820.1	prot_M-pyrifera_M_contig103320.704.1,prot_M-pyrifera_M_contig29407.9832.1,prot_M-pyrifera_M_contig30005.9944.1,prot_M-pyrifera_M_contig67093.16235.1	prot_M-clavaeformis_F_contig10696.687.1,prot_M-clavaeformis_F_contig1160.1471.1,prot_M-clavaeformis_F_contig4383.13310.1,prot_M-clavaeformis_F_contig4940.14485.1	prot_P-littoralis_Contig1412.1.1,prot_P-littoralis_Contig1412.1.3,prot_P-littoralis_Contig19.137.1,prot_P-littoralis_Contig293.44.1,prot_P-littoralis_Contig54.167.1,prot_P-littoralis_Contig54.84.2,prot_P-littoralis_Contig54.84.7,prot_P-littoralis_Contig6.14.1	prot_S-polyschides_M_contig13456.3007.1,prot_S-polyschides_M_contig15084.4041.1,prot_S-polyschides_M_contig21752.7267.1,prot_S-polyschides_M_contig31034.10269.1,prot_S-polyschides_M_contig4990.13986.1,prot_S-polyschides_M_contig80671.17789.1,prot_S-polyschides_M_contig832.18047.1	prot_S-promiscuus_M_contig22.6514.1,prot_S-promiscuus_M_contig22.6515.1,prot_S-promiscuus_M_contig22.6566.1,prot_S-promiscuus_M_contig22.6567.1,prot_S-promiscuus_M_contig22.6575.1	SJ01100,SJ02652,SJ17828,SJ17829,SJ17830,SJ17831,SJ17832,SJ17833,SJ17834,SJ17835,SJ17836,SJ17837,SJ17862,SJ17865,SJ17866,SJ17867,SJ17868	prot_S-latissima_F_contig1070.599.1,prot_S-latissima_F_contig164.4306.1,prot_S-latissima_F_contig2212.6826.1,prot_S-latissima_F_contig4181.11407.1,prot_S-latissima_F_contig4422.11818.1,prot_S-latissima_F_contig63.14116.1	prot_S-rigidula_F_contig16865.2.1,prot_S-rigidula_F_contig19228.1.1,prot_S-rigidula_F_contig5506.1.1,prot_S-rigidula_F_contig8598.1.1
OG0000087	FALSE	prot_D-dichotoma_M_contig1048.473.1,prot_D-dichotoma_M_contig1052.502.1,prot_D-dichotoma_M_contig1236.1870.1,prot_D-dichotoma_M_contig1236.1872.1,prot_D-dichotoma_M_contig1638.4431.1,prot_D-dichotoma_M_contig1638.4432.1,prot_D-dichotoma_M_contig18.5253.1,prot_D-dichotoma_M_contig2033.6493.1,prot_D-dichotoma_M_contig2149.7104.1,prot_D-dichotoma_M_contig2412.8269.1,prot_D-dichotoma_M_contig2420.829…	Ec-00_007780.1,Ec-01_012300.1,Ec-13_003060.1,Ec-13_003100.1,Ec-13_003110.1,Ec-13_003170.1,Ec-13_003180.1	prot_M-pyrifera_M_contig2594.9120.1	prot_M-clavaeformis_F_contig120.1776.1,prot_M-clavaeformis_F_contig12675.2250.1,prot_M-clavaeformis_F_contig2052.6482.1,prot_M-clavaeformis_F_contig7176.18180.1	prot_P-littoralis_Contig1059.1.1,prot_P-littoralis_Contig1059.2.1,prot_P-littoralis_Contig1235.3.10,prot_P-littoralis_Contig151.74.12,prot_P-littoralis_Contig260.2.9,prot_P-littoralis_Contig34.113.1,prot_P-littoralis_Contig784.1.2,prot_P-littoralis_Contig825.33.16	prot_S-polyschides_M_contig278.9417.1,prot_S-polyschides_M_contig3468.11233.1,prot_S-polyschides_M_contig41429.12605.1,prot_S-polyschides_M_contig8093.17816.1	prot_S-promiscuus_M_contig14.2882.1,prot_S-promiscuus_M_contig14.2885.1,prot_S-promiscuus_M_contig29.8390.1,prot_S-promiscuus_M_contig43.13306.1,prot_S-promiscuus_M_contig9.19092.1	SJ03482,SJ04565,SJ13440,SJ13442,SJ13443,SJ14262,SJ22339	prot_S-latissima_F_contig1.4.1,prot_S-latissima_F_contig2507.7886.1,prot_S-latissima_F_contig447.11862.1	prot_S-rigidula_F_contig11422.1.1,prot_S-rigidula_F_contig1473.2.1,prot_S-rigidula_F_contig14968.1.1,prot_S-rigidula_F_contig23566.2.1,prot_S-rigidula_F_contig4822.1.1,prot_S-rigidula_F_contig483.2.1,prot_S-rigidula_F_contig8135.1.2,prot_S-rigidula_F_contig994.1.2
OG0000088	FALSE	prot_D-dichotoma_M_contig1013.200.1,prot_D-dichotoma_M_contig1853.5529.1,prot_D-dichotoma_M_contig1853.5530.1,prot_D-dichotoma_M_contig2057.6587.1,prot_D-dichotoma_M_contig2184.7254.1,prot_D-dichotoma_M_contig2184.7257.1,prot_D-dichotoma_M_contig81.18948.1,prot_D-dichotoma_M_contig846.19260.1,prot_D-dichotoma_M_contig846.19261.1,prot_D-dichotoma_M_contig846.19262.1,prot_D-dichotoma_M_contig846.19…	Ec-14_001210.1,Ec-14_001620.1,Ec-23_002210.1,Ec-23_002240.1,Ec-23_002460.1,Ec-24_000230.1,Ec-24_000240.1,Ec-24_000270.1,Ec-24_000280.1,Ec-24_000410.1	prot_M-pyrifera_M_contig957.22065.1	prot_M-clavaeformis_F_contig1640.4554.1,prot_M-clavaeformis_F_contig3047.9924.1,prot_M-clavaeformis_F_contig3375.10855.1,prot_M-clavaeformis_F_contig3396.10919.1,prot_M-clavaeformis_F_contig6342.16898.1,prot_M-clavaeformis_F_contig665.17354.1,prot_M-clavaeformis_F_contig665.17355.1,prot_M-clavaeformis_F_contig665.17356.1,prot_M-clavaeformis_F_contig665.17357.1	prot_P-littoralis_Contig112.98.1,prot_P-littoralis_Contig369.34.5,prot_P-littoralis_Contig369.37.1,prot_P-littoralis_Contig369.46.1,prot_P-littoralis_Contig369.47.1,prot_P-littoralis_Contig369.49.1,prot_P-littoralis_Contig369.53.1,prot_P-littoralis_Contig540.12.1,prot_P-littoralis_Contig540.13.1,prot_P-littoralis_Contig83.113.1	prot_S-polyschides_M_contig2733.9274.1,prot_S-polyschides_M_contig2733.9275.1,prot_S-polyschides_M_contig2733.9276.1,prot_S-polyschides_M_contig3243.10641.1,prot_S-polyschides_M_contig3243.10642.1,prot_S-polyschides_M_contig4873.13818.1,prot_S-polyschides_M_contig4873.13819.1	prot_S-promiscuus_M_contig25.7395.1,prot_S-promiscuus_M_contig25.7413.1,prot_S-promiscuus_M_contig4.12559.1,prot_S-promiscuus_M_contig4.12561.1,prot_S-promiscuus_M_contig65.16872.1,prot_S-promiscuus_M_contig65.16873.1,prot_S-promiscuus_M_contig65.16874.1,prot_S-promiscuus_M_contig65.16875.1,prot_S-promiscuus_M_contig65.16878.1	SJ15400,SJ21984	prot_S-latissima_F_contig353.10349.1,prot_S-latissima_F_contig353.10350.1,prot_S-latissima_F_contig75.15342.1,prot_S-latissima_F_contig75.15343.1	prot_S-rigidula_F_contig10473.1.1,prot_S-rigidula_F_contig10948.3.1,prot_S-rigidula_F_contig2732.1.1
OG0000089	FALSE	NA	Ec-03_000130.1,Ec-11_001100.1,Ec-27_002510.1,Ec-28_001230.1	prot_M-pyrifera_M_contig103248.680.1,prot_M-pyrifera_M_contig128171.5661.1,prot_M-pyrifera_M_contig89040.20641.1,prot_M-pyrifera_M_contig92471.21392.1,prot_M-pyrifera_M_contig95159.21954.1,prot_M-pyrifera_M_contig98677.22713.1	prot_M-clavaeformis_F_contig1545.4000.1,prot_M-clavaeformis_F_contig1833.5541.1,prot_M-clavaeformis_F_contig3017.9837.1,prot_M-clavaeformis_F_contig4427.13416.1,prot_M-clavaeformis_F_contig48.14173.1,prot_M-clavaeformis_F_contig620.16686.1	prot_P-littoralis_Contig1121.5.1,prot_P-littoralis_Contig13.7.1,prot_P-littoralis_Contig18.149.1,prot_P-littoralis_Contig195.89.1,prot_P-littoralis_Contig386.1.52,prot_P-littoralis_Contig55.104.4,prot_P-littoralis_Contig987.17.2	prot_S-polyschides_M_contig125038.2310.1,prot_S-polyschides_M_contig8286.18016.1	prot_S-promiscuus_M_contig25.7247.1,prot_S-promiscuus_M_contig39.11802.1,prot_S-promiscuus_M_contig6.15975.1	SJ05253,SJ20422	prot_S-latissima_F_contig1011.133.1,prot_S-latissima_F_contig2570.8057.1,prot_S-latissima_F_contig286.8905.1,prot_S-latissima_F_contig816.16024.1	prot_S-rigidula_F_contig10181.1.1,prot_S-rigidula_F_contig10531.1.1,prot_S-rigidula_F_contig11785.1.1,prot_S-rigidula_F_contig12956.2.1,prot_S-rigidula_F_contig13616.1.1,prot_S-rigidula_F_contig14171.2.1,prot_S-rigidula_F_contig14558.1.1,prot_S-rigidula_F_contig14558.2.1,prot_S-rigidula_F_contig18188.1.1,prot_S-rigidula_F_contig18518.1.1,prot_S-rigidula_F_contig18570.1.1,prot_S-rigidula_F_contig2…
OG0000090	FALSE	prot_D-dichotoma_M_contig2442.8375.1,prot_D-dichotoma_M_contig615.17032.1	Ec-12_007980.1	prot_M-pyrifera_M_contig10815.1732.1,prot_M-pyrifera_M_contig113586.2839.1,prot_M-pyrifera_M_contig16753.6926.1,prot_M-pyrifera_M_contig19120.7583.1,prot_M-pyrifera_M_contig31584.10256.1,prot_M-pyrifera_M_contig41077.11863.1,prot_M-pyrifera_M_contig45660.12532.1	prot_M-clavaeformis_F_contig14648.3496.1,prot_M-clavaeformis_F_contig16698.4693.1,prot_M-clavaeformis_F_contig16904.4812.1,prot_M-clavaeformis_F_contig4851.14288.1,prot_M-clavaeformis_F_contig5005.14628.1,prot_M-clavaeformis_F_contig5005.14629.1,prot_M-clavaeformis_F_contig5005.14630.1,prot_M-clavaeformis_F_contig6076.16502.1,prot_M-clavaeformis_F_contig79.19103.1	prot_P-littoralis_Contig151.76.4,prot_P-littoralis_Contig200.92.4,prot_P-littoralis_Contig225.20.1,prot_P-littoralis_Contig460.39.1,prot_P-littoralis_Contig655.1.1,prot_P-littoralis_Contig81.49.1,prot_P-littoralis_Contig822.8.1,prot_P-littoralis_Contig973.19.1	prot_S-polyschides_M_contig1040.364.1,prot_S-polyschides_M_contig1040.365.1,prot_S-polyschides_M_contig112280.1115.1,prot_S-polyschides_M_contig129381.2658.1,prot_S-polyschides_M_contig13838.3292.1,prot_S-polyschides_M_contig1991.6470.1,prot_S-polyschides_M_contig1991.6471.1,prot_S-polyschides_M_contig2088.6881.1,prot_S-polyschides_M_contig25375.8663.1,prot_S-polyschides_M_contig25690.8756.1,prot…	prot_S-promiscuus_M_contig2.5312.1,prot_S-promiscuus_M_contig26.7521.1	SJ06839,SJ07003,SJ08197,SJ08572,SJ18512,SJ18513	prot_S-latissima_F_contig1894.5457.1,prot_S-latissima_F_contig2426.7620.1,prot_S-latissima_F_contig262.8200.1,prot_S-latissima_F_contig306.9412.1,prot_S-latissima_F_contig3340.10016.1,prot_S-latissima_F_contig4252.11544.1,prot_S-latissima_F_contig836.16247.1	prot_S-rigidula_F_contig13585.1.1,prot_S-rigidula_F_contig15185.1.1,prot_S-rigidula_F_contig20742.1.1,prot_S-rigidula_F_contig2434.1.1,prot_S-rigidula_F_contig27094.1.1
OG0000091	FALSE	prot_D-dichotoma_M_contig1781.5179.1,prot_D-dichotoma_M_contig4249.13757.1,prot_D-dichotoma_M_contig441.14101.1	Ec-10_003100.1,Ec-24_003810.1,Ec-24_003860.1,Ec-24_003880.1	prot_M-pyrifera_M_contig36233.11081.1	prot_M-clavaeformis_F_contig5137.14893.1,prot_M-clavaeformis_F_contig5583.15662.1	prot_P-littoralis_Contig1176.12.1,prot_P-littoralis_Contig561.6.1,prot_P-littoralis_Contig919.11.1,prot_P-littoralis_Contig92.75.6	prot_S-polyschides_M_contig22779.7732.1,prot_S-polyschides_M_contig333.10855.1,prot_S-polyschides_M_contig35051.11306.1,prot_S-polyschides_M_contig6248.15724.1	prot_S-promiscuus_M_contig1.28.1,prot_S-promiscuus_M_contig12.1938.1,prot_S-promiscuus_M_contig12.1939.1	SJ02102,SJ02103,SJ02104,SJ02317,SJ02318,SJ04281,SJ04283,SJ04284,SJ08616,SJ08617,SJ08634,SJ08635,SJ08636,SJ08858,SJ08859,SJ09276,SJ09291,SJ15023,SJ15027,SJ16727,SJ16728,SJ16729,SJ16730,SJ16731,SJ19360,SJ19362,SJ19363,SJ19364,SJ19365,SJ19369,SJ19956,SJ19957,SJ19958,SJ19959,SJ19960,SJ19961,SJ19963,SJ19964,SJ19965,SJ20590,SJ22012	prot_S-latissima_F_contig1472.3421.1,prot_S-latissima_F_contig1472.3422.1,prot_S-latissima_F_contig8.15878.1	prot_S-rigidula_F_contig3351.2.1,prot_S-rigidula_F_contig5387.1.1
OG0000092	FALSE	prot_D-dichotoma_M_contig110.874.1,prot_D-dichotoma_M_contig110.886.1,prot_D-dichotoma_M_contig145.3302.1,prot_D-dichotoma_M_contig2730.9437.1,prot_D-dichotoma_M_contig4160.13566.1,prot_D-dichotoma_M_contig549.16145.1,prot_D-dichotoma_M_contig681.17700.1	Ec-03_004620.1,Ec-14_004780.1,Ec-15_001500.1,Ec-15_001540.1,Ec-15_002500.1,Ec-16_003550.1,Ec-26_004940.1	prot_M-pyrifera_M_contig120668.4259.1,prot_M-pyrifera_M_contig26738.9295.1,prot_M-pyrifera_M_contig77942.18337.1	prot_M-clavaeformis_F_contig1203.1793.1,prot_M-clavaeformis_F_contig132.2585.1,prot_M-clavaeformis_F_contig1535.3940.1,prot_M-clavaeformis_F_contig3377.10859.1,prot_M-clavaeformis_F_contig4746.14070.1,prot_M-clavaeformis_F_contig5120.14871.1,prot_M-clavaeformis_F_contig663.17328.1,prot_M-clavaeformis_F_contig663.17329.1,prot_M-clavaeformis_F_contig712.18110.1,prot_M-clavaeformis_F_contig826.19506…	prot_P-littoralis_Contig200.84.1,prot_P-littoralis_Contig260.31.1,prot_P-littoralis_Contig29.171.1,prot_P-littoralis_Contig318.40.1,prot_P-littoralis_Contig336.1.2,prot_P-littoralis_Contig58.95.1,prot_P-littoralis_Contig954.3.2	prot_S-polyschides_M_contig14839.3894.1,prot_S-polyschides_M_contig14839.3896.1,prot_S-polyschides_M_contig2031.6632.1,prot_S-polyschides_M_contig26310.8960.1,prot_S-polyschides_M_contig3423.11110.1,prot_S-polyschides_M_contig3423.11111.1,prot_S-polyschides_M_contig3423.11112.1,prot_S-polyschides_M_contig6367.15878.1,prot_S-polyschides_M_contig8718.18469.1	prot_S-promiscuus_M_contig11.1627.1,prot_S-promiscuus_M_contig11.1706.1,prot_S-promiscuus_M_contig11.1707.1,prot_S-promiscuus_M_contig27.8002.1,prot_S-promiscuus_M_contig4.12214.1,prot_S-promiscuus_M_contig40.12823.1	SJ03912,SJ13927,SJ15263,SJ16110,SJ19278,SJ20801	prot_S-latissima_F_contig16.4106.1,prot_S-latissima_F_contig326.9861.1,prot_S-latissima_F_contig391.10954.1,prot_S-latissima_F_contig5.12540.1,prot_S-latissima_F_contig649.14266.1,prot_S-latissima_F_contig689.14696.1,prot_S-latissima_F_contig83.16174.1	prot_S-rigidula_F_contig16293.1.1,prot_S-rigidula_F_contig21.4.1,prot_S-rigidula_F_contig42.3.1,prot_S-rigidula_F_contig9931.1.1
OG0000093	FALSE	prot_D-dichotoma_M_contig1717.4875.1,prot_D-dichotoma_M_contig3033.10526.1,prot_D-dichotoma_M_contig3821.12688.1,prot_D-dichotoma_M_contig3821.12689.1	Ec-00_004520.1,Ec-00_005520.1,Ec-00_008790.1,Ec-00_008920.1,Ec-00_009250.1,Ec-00_010630.1,Ec-16_004090.1,Ec-16_004140.1,Ec-16_004210.1,Ec-26_000930.1	prot_M-pyrifera_M_contig5964.14867.1,prot_M-pyrifera_M_contig78.18346.1,prot_M-pyrifera_M_contig78.18347.1	prot_M-clavaeformis_F_contig1128.1206.1,prot_M-clavaeformis_F_contig1128.1207.1,prot_M-clavaeformis_F_contig1404.3124.1,prot_M-clavaeformis_F_contig1426.3250.1,prot_M-clavaeformis_F_contig1426.3251.1,prot_M-clavaeformis_F_contig2257.7256.1,prot_M-clavaeformis_F_contig4609.13782.1,prot_M-clavaeformis_F_contig577.15956.1,prot_M-clavaeformis_F_contig671.17436.1,prot_M-clavaeformis_F_contig697.17798.…	prot_P-littoralis_Contig161.67.10,prot_P-littoralis_Contig74.165.1,prot_P-littoralis_Contig869.2.4	prot_S-polyschides_M_contig117934.1680.1,prot_S-polyschides_M_contig1796.5602.1,prot_S-polyschides_M_contig7622.17337.1,prot_S-polyschides_M_contig8210.17945.1	prot_S-promiscuus_M_contig12.1936.1,prot_S-promiscuus_M_contig12.1942.1,prot_S-promiscuus_M_contig16.3468.1,prot_S-promiscuus_M_contig16.3470.1,prot_S-promiscuus_M_contig16.3473.1,prot_S-promiscuus_M_contig16.3474.1,prot_S-promiscuus_M_contig16.3475.1,prot_S-promiscuus_M_contig23.6786.1,prot_S-promiscuus_M_contig23.6788.1,prot_S-promiscuus_M_contig23.6793.1,prot_S-promiscuus_M_contig23.6794.1,pro…	SJ04787,SJ05628,SJ06422,SJ06671,SJ13337,SJ13338,SJ13339,SJ13343,SJ13346,SJ18342,SJ22627	prot_S-latissima_F_contig1513.3612.1,prot_S-latissima_F_contig1884.5397.1,prot_S-latissima_F_contig817.16026.1	prot_S-rigidula_F_contig20501.1.1,prot_S-rigidula_F_contig2457.1.1,prot_S-rigidula_F_contig9636.2.1,prot_S-rigidula_F_contig9636.3.1
OG0000094	FALSE	prot_D-dichotoma_M_contig1039.401.1,prot_D-dichotoma_M_contig1219.1758.1,prot_D-dichotoma_M_contig788.18697.1	Ec-13_003790.1	prot_M-pyrifera_M_contig2885.9711.1	prot_M-clavaeformis_F_contig1890.5754.1	prot_P-littoralis_Contig515.23.1	NA	NA	NA	prot_S-latissima_F_contig1059.492.1,prot_S-latissima_F_contig1101.873.1,prot_S-latissima_F_contig1101.874.1,prot_S-latissima_F_contig1154.1247.1,prot_S-latissima_F_contig1275.2082.1,prot_S-latissima_F_contig128.2116.1,prot_S-latissima_F_contig128.2117.1,prot_S-latissima_F_contig1309.2345.1,prot_S-latissima_F_contig1421.3085.1,prot_S-latissima_F_contig1577.3958.1,prot_S-latissima_F_contig1606.4162…	prot_S-rigidula_F_contig11884.2.1,prot_S-rigidula_F_contig21947.1.1,prot_S-rigidula_F_contig8792.3.1
OG0000095	FALSE	prot_D-dichotoma_M_contig2410.8264.1,prot_D-dichotoma_M_contig3089.10679.1,prot_D-dichotoma_M_contig3210.11097.1,prot_D-dichotoma_M_contig4.13139.1	Ec-13_002080.1,Ec-23_002360.1	NA	prot_M-clavaeformis_F_contig1615.4410.1,prot_M-clavaeformis_F_contig3611.11465.1,prot_M-clavaeformis_F_contig4641.13847.1	prot_P-littoralis_Contig1056.8.1,prot_P-littoralis_Contig112.17.1,prot_P-littoralis_Contig1120.7.2,prot_P-littoralis_Contig1163.7.1,prot_P-littoralis_Contig1367.7.1,prot_P-littoralis_Contig142.28.1,prot_P-littoralis_Contig153.127.1,prot_P-littoralis_Contig159.65.1,prot_P-littoralis_Contig164.63.1,prot_P-littoralis_Contig194.128.1,prot_P-littoralis_Contig194.73.1,prot_P-littoralis_Contig22.70.1,pr…	prot_S-polyschides_M_contig84809.18202.1	prot_S-promiscuus_M_contig1.285.1,prot_S-promiscuus_M_contig16.3769.1	SJ16554	NA	prot_S-rigidula_F_contig10434.3.1,prot_S-rigidula_F_contig10733.1.1,prot_S-rigidula_F_contig11855.1.1,prot_S-rigidula_F_contig12500.3.1,prot_S-rigidula_F_contig12846.3.1,prot_S-rigidula_F_contig13167.1.1,prot_S-rigidula_F_contig16127.1.1,prot_S-rigidula_F_contig17562.1.1,prot_S-rigidula_F_contig21672.4.1,prot_S-rigidula_F_contig21869.1.1,prot_S-rigidula_F_contig21869.2.1,prot_S-rigidula_F_contig2…
OG0000096	FALSE	prot_D-dichotoma_M_contig1026.308.1,prot_D-dichotoma_M_contig1239.1891.1,prot_D-dichotoma_M_contig185.5516.1,prot_D-dichotoma_M_contig363.12211.1,prot_D-dichotoma_M_contig481.14906.1,prot_D-dichotoma_M_contig481.14908.1,prot_D-dichotoma_M_contig679.17681.1,prot_D-dichotoma_M_contig837.19177.1	Ec-00_004000.1,Ec-01_011430.1,Ec-01_011450.1,Ec-05_005000.1,Ec-12_003580.1,Ec-12_003640.1	prot_M-pyrifera_M_contig3127.10202.1,prot_M-pyrifera_M_contig34134.10727.1,prot_M-pyrifera_M_contig5103.13413.1,prot_M-pyrifera_M_contig752.17757.1	prot_M-clavaeformis_F_contig118.1596.1,prot_M-clavaeformis_F_contig118.1598.1,prot_M-clavaeformis_F_contig153.3900.1,prot_M-clavaeformis_F_contig1741.5087.1,prot_M-clavaeformis_F_contig1916.5864.1,prot_M-clavaeformis_F_contig7317.18361.1,prot_M-clavaeformis_F_contig7430.18506.1	prot_P-littoralis_Contig1061.12.2,prot_P-littoralis_Contig14.142.1,prot_P-littoralis_Contig298.52.1,prot_P-littoralis_Contig804.2.1,prot_P-littoralis_Contig966.2.2	prot_S-polyschides_M_contig1119.1073.1,prot_S-polyschides_M_contig11987.1886.1,prot_S-polyschides_M_contig14259.3573.1,prot_S-polyschides_M_contig1549.4284.1,prot_S-polyschides_M_contig22659.7687.1	prot_S-promiscuus_M_contig2.5493.1,prot_S-promiscuus_M_contig2.5617.1,prot_S-promiscuus_M_contig27.7823.1,prot_S-promiscuus_M_contig44.13541.1,prot_S-promiscuus_M_contig44.13553.1,prot_S-promiscuus_M_contig53.15448.1,prot_S-promiscuus_M_contig57.15726.1,prot_S-promiscuus_M_contig61.16707.1,prot_S-promiscuus_M_contig61.16708.1	SJ00892,SJ02395,SJ04130,SJ06660,SJ06678,SJ07511,SJ07748,SJ07757,SJ08887,SJ12919,SJ13585,SJ16079,SJ22070,SJ22071	prot_S-latissima_F_contig1174.1380.1,prot_S-latissima_F_contig1239.1833.1,prot_S-latissima_F_contig1347.2564.1,prot_S-latissima_F_contig506.12674.1,prot_S-latissima_F_contig61.13934.1	prot_S-rigidula_F_contig21197.1.1,prot_S-rigidula_F_contig8169.3.1
OG0000097	FALSE	NA	NA	prot_M-pyrifera_M_contig102413.509.1,prot_M-pyrifera_M_contig1223.4594.1,prot_M-pyrifera_M_contig39414.11627.1,prot_M-pyrifera_M_contig69674.16692.1	prot_M-clavaeformis_F_contig7331.18381.1,prot_M-clavaeformis_F_contig8097.19333.1	prot_P-littoralis_Contig1037.10.1,prot_P-littoralis_Contig116.109.1,prot_P-littoralis_Contig174.82.1,prot_P-littoralis_Contig264.78.1,prot_P-littoralis_Contig28.50.1,prot_P-littoralis_Contig31.145.1,prot_P-littoralis_Contig336.19.1,prot_P-littoralis_Contig39.180.1,prot_P-littoralis_Contig501.17.1,prot_P-littoralis_Contig51.133.1,prot_P-littoralis_Contig720.23.1	prot_S-polyschides_M_contig11899.1798.1,prot_S-polyschides_M_contig137215.3204.1,prot_S-polyschides_M_contig165.4874.1,prot_S-polyschides_M_contig27132.9221.1,prot_S-polyschides_M_contig27712.9389.1,prot_S-polyschides_M_contig29400.9849.1,prot_S-polyschides_M_contig34573.11191.1,prot_S-polyschides_M_contig5358.14494.1,prot_S-polyschides_M_contig5394.14534.1,prot_S-polyschides_M_contig604.15429.1,…	NA	SJ01428,SJ02615,SJ05550,SJ07362,SJ09358,SJ10648,SJ11503,SJ12168,SJ12205,SJ12290,SJ14081,SJ15565,SJ20893	prot_S-latissima_F_contig191.5519.1	prot_S-rigidula_F_contig11091.1.1,prot_S-rigidula_F_contig11099.1.1,prot_S-rigidula_F_contig11369.1.1,prot_S-rigidula_F_contig12530.1.1,prot_S-rigidula_F_contig14071.1.1,prot_S-rigidula_F_contig14290.3.1,prot_S-rigidula_F_contig20181.1.1,prot_S-rigidula_F_contig21404.1.1,prot_S-rigidula_F_contig2155.1.1,prot_S-rigidula_F_contig2314.4.1,prot_S-rigidula_F_contig23641.1.1,prot_S-rigidula_F_contig240…
OG0000098	FALSE	prot_D-dichotoma_M_contig810.18960.1	Ec-02_004500.1,Ec-02_004690.1,Ec-02_004695.1,Ec-07_000700.1,Ec-13_000240.1,Ec-13_002310.1,Ec-13_002640.1,Ec-13_002650.1	prot_M-pyrifera_M_contig10710.1529.1	prot_M-clavaeformis_F_contig1145.1350.1,prot_M-clavaeformis_F_contig1145.1351.1,prot_M-clavaeformis_F_contig192.5878.1,prot_M-clavaeformis_F_contig2032.6405.1,prot_M-clavaeformis_F_contig670.17423.1	prot_P-littoralis_Contig24.2.1,prot_P-littoralis_Contig24.63.1,prot_P-littoralis_Contig319.27.1,prot_P-littoralis_Contig443.2.2,prot_P-littoralis_Contig505.25.2,prot_P-littoralis_Contig780.1.1	prot_S-polyschides_M_contig13225.2849.1,prot_S-polyschides_M_contig27428.9306.1,prot_S-polyschides_M_contig3901.12142.1	prot_S-promiscuus_M_contig1.197.1,prot_S-promiscuus_M_contig3.8901.1,prot_S-promiscuus_M_contig51.15185.1,prot_S-promiscuus_M_contig58.15797.1,prot_S-promiscuus_M_contig8.18055.1,prot_S-promiscuus_M_contig8.18065.1,prot_S-promiscuus_M_contig8.18067.1	SJ00475,SJ02107,SJ02109,SJ02360,SJ02767,SJ02768,SJ05492,SJ05495,SJ06662,SJ08069,SJ08071,SJ08072,SJ13735,SJ13736,SJ13738,SJ13743,SJ13745,SJ13867,SJ17954,SJ17956,SJ17961,SJ17963,SJ22237	prot_S-latissima_F_contig341.10177.1,prot_S-latissima_F_contig341.10178.1,prot_S-latissima_F_contig80.15879.1	prot_S-rigidula_F_contig12782.1.1,prot_S-rigidula_F_contig12866.1.1,prot_S-rigidula_F_contig12933.1.1,prot_S-rigidula_F_contig1363.6.1,prot_S-rigidula_F_contig22668.1.1,prot_S-rigidula_F_contig27244.1.1,prot_S-rigidula_F_contig4489.1.1
OG0000099	FALSE	NA	NA	prot_M-pyrifera_M_contig160.6724.1,prot_M-pyrifera_M_contig6784.16368.1,prot_M-pyrifera_M_contig8065.18877.1	prot_M-clavaeformis_F_contig9480.20788.1	NA	prot_S-polyschides_M_contig119760.1871.1,prot_S-polyschides_M_contig19908.6469.1,prot_S-polyschides_M_contig284.9593.1,prot_S-polyschides_M_contig59568.15336.1	prot_S-promiscuus_M_contig2.5383.1,prot_S-promiscuus_M_contig24.7069.1,prot_S-promiscuus_M_contig3.9491.1,prot_S-promiscuus_M_contig4.12062.1,prot_S-promiscuus_M_contig59.15890.1,prot_S-promiscuus_M_contig76.17770.1,prot_S-promiscuus_M_contig9.18882.1,prot_S-promiscuus_M_contig97.19191.1	SJ00594,SJ00837,SJ01297,SJ02855,SJ03453,SJ03850,SJ03851,SJ04041,SJ04690,SJ04856,SJ04886,SJ07409,SJ07589,SJ07642,SJ07974,SJ08188,SJ08548,SJ08863,SJ08894,SJ09190,SJ09419,SJ09856,SJ09982,SJ10058,SJ13043,SJ13990,SJ14382,SJ15318,SJ16089,SJ16673,SJ16748,SJ18268,SJ18370,SJ21128,SJ21759	prot_S-latissima_F_contig547.13201.1	prot_S-rigidula_F_contig13413.1.1,prot_S-rigidula_F_contig14877.3.1,prot_S-rigidula_F_contig1701.1.1,prot_S-rigidula_F_contig18841.3.1,prot_S-rigidula_F_contig20118.1.1,prot_S-rigidula_F_contig20642.1.1,prot_S-rigidula_F_contig21601.1.1,prot_S-rigidula_F_contig2427.1.1,prot_S-rigidula_F_contig26064.1.1,prot_S-rigidula_F_contig4071.1.1,prot_S-rigidula_F_contig7610.2.1,prot_S-rigidula_F_contig9429.…
OG0000100	FALSE	NA	Ec-00_000300.1,Ec-00_004050.1,Ec-00_007450.1,Ec-00_007970.1,Ec-01_011540.1,Ec-04_002132.1,Ec-05_000070.1,Ec-05_000080.1,Ec-05_000710.1	NA	prot_M-clavaeformis_F_contig16479.4586.1,prot_M-clavaeformis_F_contig3496.11161.1,prot_M-clavaeformis_F_contig5927.16232.1	prot_P-littoralis_Contig1311.2.1,prot_P-littoralis_Contig1311.4.1,prot_P-littoralis_Contig1347.12.1,prot_P-littoralis_Contig1347.7.1,prot_P-littoralis_Contig1363.6.8,prot_P-littoralis_Contig1411.2.1,prot_P-littoralis_Contig158.77.1,prot_P-littoralis_Contig160.24.1,prot_P-littoralis_Contig162.72.1,prot_P-littoralis_Contig162.75.1,prot_P-littoralis_Contig162.78.1,prot_P-littoralis_Contig168.22.1,pr…	prot_S-polyschides_M_contig112461.1130.1,prot_S-polyschides_M_contig113573.1258.1,prot_S-polyschides_M_contig80934.17817.1,prot_S-polyschides_M_contig81843.17904.1	prot_S-promiscuus_M_contig1.134.1,prot_S-promiscuus_M_contig12.2073.1,prot_S-promiscuus_M_contig14.2650.1,prot_S-promiscuus_M_contig33.10364.1,prot_S-promiscuus_M_contig47.13919.1,prot_S-promiscuus_M_contig53.15444.1,prot_S-promiscuus_M_contig64.16816.1,prot_S-promiscuus_M_contig7.17125.1	SJ07527	NA	NA
OG0000101	FALSE	prot_D-dichotoma_M_contig975.20434.1	NA	prot_M-pyrifera_M_contig102496.535.1,prot_M-pyrifera_M_contig111557.2404.1,prot_M-pyrifera_M_contig1371.6037.1,prot_M-pyrifera_M_contig18459.7417.1,prot_M-pyrifera_M_contig3595.11018.1,prot_M-pyrifera_M_contig407.11801.1,prot_M-pyrifera_M_contig40982.11842.1,prot_M-pyrifera_M_contig43382.12203.1,prot_M-pyrifera_M_contig46364.12639.1,prot_M-pyrifera_M_contig46766.12710.1,prot_M-pyrifera_M_contig48…	prot_M-clavaeformis_F_contig16673.4680.1,prot_M-clavaeformis_F_contig17792.5255.1,prot_M-clavaeformis_F_contig9452.20763.1	prot_P-littoralis_Contig1072.1.1,prot_P-littoralis_Contig1074.1.1,prot_P-littoralis_Contig1129.6.1,prot_P-littoralis_Contig1199.5.1,prot_P-littoralis_Contig13.160.1,prot_P-littoralis_Contig1304.1.1,prot_P-littoralis_Contig139.126.1,prot_P-littoralis_Contig1481.2.1,prot_P-littoralis_Contig1504.3.1,prot_P-littoralis_Contig1546.1.1,prot_P-littoralis_Contig176.109.1,prot_P-littoralis_Contig212.97.1,p…	prot_S-polyschides_M_contig27009.9188.1,prot_S-polyschides_M_contig41564.12633.1	prot_S-promiscuus_M_contig30.9666.1,prot_S-promiscuus_M_contig31.10035.1	SJ00565,SJ02582,SJ06025,SJ06675,SJ07004,SJ17158,SJ19193	prot_S-latissima_F_contig2601.8146.1	prot_S-rigidula_F_contig17779.1.1
OG0000102	FALSE	NA	Ec-00_002200.1,Ec-03_001480.1,Ec-04_003490.1,Ec-09_001730.1,Ec-23_001880.1	prot_M-pyrifera_M_contig3609.11051.1	prot_M-clavaeformis_F_contig12069.1809.1,prot_M-clavaeformis_F_contig2669.8750.1,prot_M-clavaeformis_F_contig3150.10247.1	prot_P-littoralis_Contig1054.44.1,prot_P-littoralis_Contig11.92.1,prot_P-littoralis_Contig1112.10.1,prot_P-littoralis_Contig1132.5.1,prot_P-littoralis_Contig128.23.1,prot_P-littoralis_Contig130.26.1,prot_P-littoralis_Contig132.43.1,prot_P-littoralis_Contig133.66.2,prot_P-littoralis_Contig14.157.1,prot_P-littoralis_Contig151.64.1,prot_P-littoralis_Contig156.47.1,prot_P-littoralis_Contig169.117.1,p…	prot_S-polyschides_M_contig74507.17155.1	prot_S-promiscuus_M_contig31.9949.1,prot_S-promiscuus_M_contig6.15984.1	NA	NA	NA
OG0000103	FALSE	prot_D-dichotoma_M_contig1153.1263.1,prot_D-dichotoma_M_contig1198.1593.1,prot_D-dichotoma_M_contig1232.1846.1,prot_D-dichotoma_M_contig1501.3608.1,prot_D-dichotoma_M_contig1881.5672.1,prot_D-dichotoma_M_contig1888.5691.1,prot_D-dichotoma_M_contig1910.5835.1,prot_D-dichotoma_M_contig1995.6227.1,prot_D-dichotoma_M_contig2058.6591.1,prot_D-dichotoma_M_contig2059.6593.1,prot_D-dichotoma_M_contig212.…	Ec-00_004910.1,Ec-14_005700.1	prot_M-pyrifera_M_contig37151.11251.1	prot_M-clavaeformis_F_contig8828.20110.1	prot_P-littoralis_Contig15.137.1,prot_P-littoralis_Contig437.63.1,prot_P-littoralis_Contig95.116.1	prot_S-polyschides_M_contig9030.18848.1	NA	SJ06611,SJ11458,SJ12848,SJ22210	prot_S-latissima_F_contig1142.1182.1,prot_S-latissima_F_contig1704.4646.1,prot_S-latissima_F_contig2144.6557.1,prot_S-latissima_F_contig792.15823.1	prot_S-rigidula_F_contig8958.1.1
OG0000104	FALSE	prot_D-dichotoma_M_contig1.20.1,prot_D-dichotoma_M_contig100.94.1,prot_D-dichotoma_M_contig1073.651.1,prot_D-dichotoma_M_contig1088.755.1,prot_D-dichotoma_M_contig116.1312.1,prot_D-dichotoma_M_contig1235.1861.1,prot_D-dichotoma_M_contig1402.3002.1,prot_D-dichotoma_M_contig151.3646.1,prot_D-dichotoma_M_contig1661.4580.1,prot_D-dichotoma_M_contig1693.4722.1,prot_D-dichotoma_M_contig1777.5151.1,prot…	Ec-00_003970.1,Ec-25_000800.1	NA	NA	prot_P-littoralis_Contig1144.6.1,prot_P-littoralis_Contig172.30.1,prot_P-littoralis_Contig21.7.1,prot_P-littoralis_Contig212.54.1,prot_P-littoralis_Contig273.41.1,prot_P-littoralis_Contig632.14.1,prot_P-littoralis_Contig689.32.1	prot_S-polyschides_M_contig66999.16302.1	prot_S-promiscuus_M_contig1.346.1,prot_S-promiscuus_M_contig36.11099.1	SJ05883,SJ14205	prot_S-latissima_F_contig1323.2451.1,prot_S-latissima_F_contig175.4822.1,prot_S-latissima_F_contig2161.6610.1	NA
OG0000105	FALSE	prot_D-dichotoma_M_contig1027.315.1,prot_D-dichotoma_M_contig1044.451.1,prot_D-dichotoma_M_contig1094.817.1,prot_D-dichotoma_M_contig1124.1056.1,prot_D-dichotoma_M_contig1144.1204.1,prot_D-dichotoma_M_contig1159.1300.1,prot_D-dichotoma_M_contig1187.1492.1,prot_D-dichotoma_M_contig129.2204.1,prot_D-dichotoma_M_contig1303.2356.1,prot_D-dichotoma_M_contig1408.3022.1,prot_D-dichotoma_M_contig1437.319…	NA	NA	prot_M-clavaeformis_F_contig10570.587.1	prot_P-littoralis_Contig1039.16.1,prot_P-littoralis_Contig1317.4.1,prot_P-littoralis_Contig141.17.1	NA	prot_S-promiscuus_M_contig15.3107.1,prot_S-promiscuus_M_contig24.7190.1	SJ05096	NA	prot_S-rigidula_F_contig17293.1.1,prot_S-rigidula_F_contig26038.1.1,prot_S-rigidula_F_contig5608.1.1
OG0000106	FALSE	prot_D-dichotoma_M_contig214.7052.1,prot_D-dichotoma_M_contig247.8474.1,prot_D-dichotoma_M_contig30.10408.1	Ec-10_003000.1,Ec-12_000420.1,Ec-18_000450.1	prot_M-pyrifera_M_contig29.9747.1,prot_M-pyrifera_M_contig43840.12273.1,prot_M-pyrifera_M_contig6227.15333.1	prot_M-clavaeformis_F_contig302.9845.1,prot_M-clavaeformis_F_contig4379.13300.1	prot_P-littoralis_Contig1050.6.2,prot_P-littoralis_Contig160.56.1,prot_P-littoralis_Contig790.16.2,prot_P-littoralis_Contig93.60.1	prot_S-polyschides_M_contig10003.2.1,prot_S-polyschides_M_contig10003.3.1,prot_S-polyschides_M_contig1073.658.1,prot_S-polyschides_M_contig16315.4782.1,prot_S-polyschides_M_contig2285.7758.1,prot_S-polyschides_M_contig2285.7759.1,prot_S-polyschides_M_contig2452.8368.1,prot_S-polyschides_M_contig2780.9418.1,prot_S-polyschides_M_contig5131.14196.1,prot_S-polyschides_M_contig750.17197.1,prot_S-polys…	prot_S-promiscuus_M_contig30.9769.1,prot_S-promiscuus_M_contig5.14964.1,prot_S-promiscuus_M_contig9.18783.1,prot_S-promiscuus_M_contig9.18795.1,prot_S-promiscuus_M_contig9.18796.1,prot_S-promiscuus_M_contig9.18813.1,prot_S-promiscuus_M_contig9.18815.1,prot_S-promiscuus_M_contig9.18816.1	SJ09008,SJ09009,SJ09010,SJ09011,SJ09012,SJ09013,SJ09014,SJ09015,SJ09016,SJ09017,SJ09018,SJ09032,SJ09033,SJ20911	prot_S-latissima_F_contig1030.286.1,prot_S-latissima_F_contig312.9552.1,prot_S-latissima_F_contig312.9553.1,prot_S-latissima_F_contig312.9554.1,prot_S-latissima_F_contig312.9555.1,prot_S-latissima_F_contig312.9556.1,prot_S-latissima_F_contig312.9557.1,prot_S-latissima_F_contig325.9842.1,prot_S-latissima_F_contig831.16206.1	prot_S-rigidula_F_contig10059.2.1,prot_S-rigidula_F_contig1705.3.1,prot_S-rigidula_F_contig6311.1.1
OG0000107	FALSE	prot_D-dichotoma_M_contig2048.6546.1,prot_D-dichotoma_M_contig2631.9068.1,prot_D-dichotoma_M_contig269.9271.1,prot_D-dichotoma_M_contig269.9272.1,prot_D-dichotoma_M_contig2751.9490.1,prot_D-dichotoma_M_contig366.12279.1,prot_D-dichotoma_M_contig366.12280.1,prot_D-dichotoma_M_contig366.12281.1,prot_D-dichotoma_M_contig793.18757.1	Ec-01_006220.1,Ec-01_006250.1,Ec-02_004700.1,Ec-17_000940.1,Ec-19_005420.1	prot_M-pyrifera_M_contig113440.2807.1,prot_M-pyrifera_M_contig49675.13181.1	prot_M-clavaeformis_F_contig228.7337.1,prot_M-clavaeformis_F_contig2514.8207.1,prot_M-clavaeformis_F_contig3171.10301.1,prot_M-clavaeformis_F_contig3631.11518.1,prot_M-clavaeformis_F_contig4544.13639.1,prot_M-clavaeformis_F_contig505.14712.1,prot_M-clavaeformis_F_contig505.14713.1	prot_P-littoralis_Contig220.32.2,prot_P-littoralis_Contig220.54.3	prot_S-polyschides_M_contig10425.391.1,prot_S-polyschides_M_contig1331.2915.1,prot_S-polyschides_M_contig1724.5265.1,prot_S-polyschides_M_contig25029.8549.1	prot_S-promiscuus_M_contig15.3117.1,prot_S-promiscuus_M_contig21.6282.1,prot_S-promiscuus_M_contig21.6283.1,prot_S-promiscuus_M_contig21.6285.1,prot_S-promiscuus_M_contig21.6286.1,prot_S-promiscuus_M_contig21.6287.1,prot_S-promiscuus_M_contig21.6288.1,prot_S-promiscuus_M_contig21.6289.1,prot_S-promiscuus_M_contig21.6290.1	SJ00880,SJ02609,SJ02610,SJ02611,SJ03009,SJ05091,SJ10546,SJ10547,SJ11740,SJ17540,SJ21943	prot_S-latissima_F_contig1053.456.1,prot_S-latissima_F_contig1053.457.1,prot_S-latissima_F_contig1053.458.1,prot_S-latissima_F_contig1231.1799.1,prot_S-latissima_F_contig1408.2992.1,prot_S-latissima_F_contig141.3011.1,prot_S-latissima_F_contig141.3012.1,prot_S-latissima_F_contig141.3013.1,prot_S-latissima_F_contig519.12871.1,prot_S-latissima_F_contig958.17306.1	prot_S-rigidula_F_contig3908.1.1
OG0000108	FALSE	NA	Ec-08_006230.1	prot_M-pyrifera_M_contig109014.1889.1,prot_M-pyrifera_M_contig11325.2767.1	prot_M-clavaeformis_F_contig12581.2185.1,prot_M-clavaeformis_F_contig4916.14428.1,prot_M-clavaeformis_F_contig6170.16628.1,prot_M-clavaeformis_F_contig8529.19794.1	prot_P-littoralis_Contig1054.38.2,prot_P-littoralis_Contig1204.1.1,prot_P-littoralis_Contig122.9.1,prot_P-littoralis_Contig1357.2.1,prot_P-littoralis_Contig1381.1.1,prot_P-littoralis_Contig14.24.1,prot_P-littoralis_Contig144.64.1,prot_P-littoralis_Contig166.34.1,prot_P-littoralis_Contig178.36.1,prot_P-littoralis_Contig195.96.1,prot_P-littoralis_Contig244.44.1,prot_P-littoralis_Contig252.51.1,prot…	prot_S-polyschides_M_contig93248.19107.1	NA	SJ08622,SJ14433	prot_S-latissima_F_contig1864.5321.1,prot_S-latissima_F_contig466.12130.1,prot_S-latissima_F_contig583.13595.1,prot_S-latissima_F_contig989.17593.1	NA
OG0000109	FALSE	prot_D-dichotoma_M_contig225.7542.1,prot_D-dichotoma_M_contig245.8399.1,prot_D-dichotoma_M_contig505.15401.1,prot_D-dichotoma_M_contig66.17531.1,prot_D-dichotoma_M_contig730.18182.1,prot_D-dichotoma_M_contig96.20298.1	Ec-05_001090.1,Ec-05_003600.1,Ec-06_003520.1,Ec-08_004290.1,Ec-14_002500.1,Ec-28_002800.1	prot_M-pyrifera_M_contig2367.8636.1,prot_M-pyrifera_M_contig33215.10573.1,prot_M-pyrifera_M_contig65998.16024.1,prot_M-pyrifera_M_contig9042.20960.1	prot_M-clavaeformis_F_contig325.10510.1,prot_M-clavaeformis_F_contig5718.15875.1,prot_M-clavaeformis_F_contig5718.15876.1,prot_M-clavaeformis_F_contig6186.16648.1,prot_M-clavaeformis_F_contig725.18265.1,prot_M-clavaeformis_F_contig844.19703.1,prot_M-clavaeformis_F_contig9084.20401.1	prot_P-littoralis_Contig1119.18.11,prot_P-littoralis_Contig162.2.1,prot_P-littoralis_Contig176.41.3,prot_P-littoralis_Contig182.97.1,prot_P-littoralis_Contig553.17.10	prot_S-polyschides_M_contig11601.1504.1,prot_S-polyschides_M_contig14876.3917.1,prot_S-polyschides_M_contig18889.6042.1,prot_S-polyschides_M_contig7288.16976.1	prot_S-promiscuus_M_contig20.5734.1,prot_S-promiscuus_M_contig20.5962.1,prot_S-promiscuus_M_contig29.8613.1,prot_S-promiscuus_M_contig32.10211.1,prot_S-promiscuus_M_contig7.17148.1	SJ07417,SJ17038,SJ17229,SJ17254,SJ22533,SJ22658	prot_S-latissima_F_contig1107.891.1,prot_S-latissima_F_contig1683.4503.1,prot_S-latissima_F_contig172.4718.1,prot_S-latissima_F_contig405.11220.1,prot_S-latissima_F_contig711.14980.1,prot_S-latissima_F_contig711.14981.1,prot_S-latissima_F_contig711.14982.1	prot_S-rigidula_F_contig10677.1.1,prot_S-rigidula_F_contig1443.1.1,prot_S-rigidula_F_contig1443.3.1,prot_S-rigidula_F_contig16897.2.1,prot_S-rigidula_F_contig22297.1.1,prot_S-rigidula_F_contig25295.1.1,prot_S-rigidula_F_contig3567.1.1,prot_S-rigidula_F_contig384.2.1,prot_S-rigidula_F_contig7721.2.1
OG0000110	FALSE	prot_D-dichotoma_M_contig134.2579.1,prot_D-dichotoma_M_contig1431.3155.1,prot_D-dichotoma_M_contig1562.3935.1,prot_D-dichotoma_M_contig2844.9818.1	Ec-03_005200.1,Ec-03_005320.1,Ec-12_000310.1,Ec-12_005210.1,Ec-26_004450.1	prot_M-pyrifera_M_contig18282.7362.1,prot_M-pyrifera_M_contig23241.8554.1	prot_M-clavaeformis_F_contig10857.841.1,prot_M-clavaeformis_F_contig11568.1435.1,prot_M-clavaeformis_F_contig12348.2008.1,prot_M-clavaeformis_F_contig12968.2428.1,prot_M-clavaeformis_F_contig1409.3152.1,prot_M-clavaeformis_F_contig1728.5018.1,prot_M-clavaeformis_F_contig317.10296.1,prot_M-clavaeformis_F_contig7918.19127.1	prot_P-littoralis_Contig1123.1.4,prot_P-littoralis_Contig1123.8.2,prot_P-littoralis_Contig168.54.2,prot_P-littoralis_Contig184.9.1,prot_P-littoralis_Contig201.85.3,prot_P-littoralis_Contig214.42.3,prot_P-littoralis_Contig22.7.1,prot_P-littoralis_Contig295.17.2,prot_P-littoralis_Contig391.3.1,prot_P-littoralis_Contig531.15.8,prot_P-littoralis_Contig58.37.1,prot_P-littoralis_Contig821.7.1,prot_P-li…	prot_S-polyschides_M_contig28333.9563.1,prot_S-polyschides_M_contig5472.14643.1	prot_S-promiscuus_M_contig14.2897.1,prot_S-promiscuus_M_contig14.2900.1,prot_S-promiscuus_M_contig14.2901.1,prot_S-promiscuus_M_contig14.2902.1,prot_S-promiscuus_M_contig27.7831.1,prot_S-promiscuus_M_contig27.7835.1,prot_S-promiscuus_M_contig3.8986.1,prot_S-promiscuus_M_contig5.14483.1,prot_S-promiscuus_M_contig5.14988.1,prot_S-promiscuus_M_contig5.14989.1	SJ02300,SJ04371,SJ05332,SJ06328,SJ06329,SJ06413,SJ07328,SJ09170,SJ11303	prot_S-latissima_F_contig1508.3592.1,prot_S-latissima_F_contig1725.4735.1,prot_S-latissima_F_contig225.6938.1,prot_S-latissima_F_contig4.11092.1,prot_S-latissima_F_contig648.14258.1	prot_S-rigidula_F_contig6368.1.1
OG0000111	FALSE	prot_D-dichotoma_M_contig1162.1345.1,prot_D-dichotoma_M_contig182.5383.1,prot_D-dichotoma_M_contig182.5386.1,prot_D-dichotoma_M_contig215.7114.1,prot_D-dichotoma_M_contig227.7610.1,prot_D-dichotoma_M_contig227.7613.1,prot_D-dichotoma_M_contig771.18578.1	Ec-00_005430.1,Ec-05_002510.1,Ec-07_000460.1,Ec-07_000490.1,Ec-26_005830.1,Ec-26_005880.1,Ec-26_006390.1,Ec-26_006480.1	prot_M-pyrifera_M_contig13213.5882.1,prot_M-pyrifera_M_contig15089.6453.1,prot_M-pyrifera_M_contig15610.6607.1,prot_M-pyrifera_M_contig17814.7217.1,prot_M-pyrifera_M_contig3903.11565.1	prot_M-clavaeformis_F_contig3422.10996.1,prot_M-clavaeformis_F_contig4074.12640.1,prot_M-clavaeformis_F_contig5556.15620.1,prot_M-clavaeformis_F_contig7627.18768.1	prot_P-littoralis_Contig271.12.4,prot_P-littoralis_Contig277.85.1,prot_P-littoralis_Contig53.7.2,prot_P-littoralis_Contig64.13.1,prot_P-littoralis_Contig64.5.1,prot_P-littoralis_Contig808.8.1	prot_S-polyschides_M_contig13567.3079.1,prot_S-polyschides_M_contig30679.10186.1,prot_S-polyschides_M_contig4815.13743.1,prot_S-polyschides_M_contig6071.15469.1,prot_S-polyschides_M_contig6372.15887.1	prot_S-promiscuus_M_contig14.3008.1,prot_S-promiscuus_M_contig14.3014.1,prot_S-promiscuus_M_contig14.3040.1,prot_S-promiscuus_M_contig14.3089.1,prot_S-promiscuus_M_contig51.15204.1,prot_S-promiscuus_M_contig51.15209.1,prot_S-promiscuus_M_contig51.15215.1	SJ01166,SJ01168,SJ02959,SJ16815,SJ21544,SJ22469	prot_S-latissima_F_contig130.2275.1,prot_S-latissima_F_contig130.2278.1,prot_S-latissima_F_contig130.2287.1	prot_S-rigidula_F_contig13052.5.1,prot_S-rigidula_F_contig14147.4.1,prot_S-rigidula_F_contig14777.5.1,prot_S-rigidula_F_contig15501.1.1,prot_S-rigidula_F_contig19106.2.1,prot_S-rigidula_F_contig20142.1.2,prot_S-rigidula_F_contig24704.2.2,prot_S-rigidula_F_contig5046.3.2
OG0000112	FALSE	prot_D-dichotoma_M_contig1696.4743.1,prot_D-dichotoma_M_contig456.14415.1	Ec-08_006400.1,Ec-08_006430.1,Ec-08_006450.1,Ec-08_006470.1,Ec-08_006500.1,Ec-08_006510.1,Ec-08_006540.1,Ec-08_006570.1,Ec-08_006590.1,Ec-13_004720.1,Ec-13_004730.1	prot_M-pyrifera_M_contig6818.16421.1	prot_M-clavaeformis_F_contig1230.1990.1,prot_M-clavaeformis_F_contig1346.2739.1,prot_M-clavaeformis_F_contig1836.5546.1,prot_M-clavaeformis_F_contig3413.10965.1,prot_M-clavaeformis_F_contig3607.11451.1,prot_M-clavaeformis_F_contig4408.13372.1,prot_M-clavaeformis_F_contig4567.13680.1,prot_M-clavaeformis_F_contig517.14948.1,prot_M-clavaeformis_F_contig517.14949.1,prot_M-clavaeformis_F_contig716.181…	prot_P-littoralis_Contig307.6.2,prot_P-littoralis_Contig313.46.1,prot_P-littoralis_Contig313.53.3,prot_P-littoralis_Contig38.35.1	prot_S-polyschides_M_contig15867.4513.1,prot_S-polyschides_M_contig17878.5568.1,prot_S-polyschides_M_contig2119.7023.1,prot_S-polyschides_M_contig42478.12797.1,prot_S-polyschides_M_contig5791.15113.1,prot_S-polyschides_M_contig71111.16785.1	prot_S-promiscuus_M_contig29.8404.1,prot_S-promiscuus_M_contig29.8405.1,prot_S-promiscuus_M_contig29.8408.1,prot_S-promiscuus_M_contig29.8410.1,prot_S-promiscuus_M_contig29.8411.1,prot_S-promiscuus_M_contig29.8412.1,prot_S-promiscuus_M_contig29.8413.1,prot_S-promiscuus_M_contig5.14954.1,prot_S-promiscuus_M_contig9.18932.1,prot_S-promiscuus_M_contig9.18971.1	SJ00548,SJ06367,SJ11302,SJ19324,SJ19325	prot_S-latissima_F_contig1173.1379.1,prot_S-latissima_F_contig1207.1622.1,prot_S-latissima_F_contig1207.1623.1,prot_S-latissima_F_contig1242.1851.1,prot_S-latissima_F_contig1242.1852.1,prot_S-latissima_F_contig449.11900.1,prot_S-latissima_F_contig449.11901.1	prot_S-rigidula_F_contig5545.1.1
OG0000113	FALSE	NA	Ec-00_005680.1,Ec-00_006900.1,Ec-01_010220.1,Ec-14_005160.1	prot_M-pyrifera_M_contig17704.7185.1,prot_M-pyrifera_M_contig2503.8941.1,prot_M-pyrifera_M_contig3719.11255.1,prot_M-pyrifera_M_contig4835.12962.1	prot_M-clavaeformis_F_contig10.46.1,prot_M-clavaeformis_F_contig1365.2863.1,prot_M-clavaeformis_F_contig1492.3668.1,prot_M-clavaeformis_F_contig209.6627.1,prot_M-clavaeformis_F_contig2853.9349.1,prot_M-clavaeformis_F_contig3409.10952.1,prot_M-clavaeformis_F_contig3452.11073.1,prot_M-clavaeformis_F_contig424.13006.1,prot_M-clavaeformis_F_contig4261.13045.1,prot_M-clavaeformis_F_contig4946.14492.1,…	prot_P-littoralis_Contig158.101.11,prot_P-littoralis_Contig224.12.12,prot_P-littoralis_Contig47.36.3	prot_S-polyschides_M_contig5147.14214.1	prot_S-promiscuus_M_contig1.91.1,prot_S-promiscuus_M_contig11.1659.1,prot_S-promiscuus_M_contig22.6387.1,prot_S-promiscuus_M_contig24.7068.1,prot_S-promiscuus_M_contig26.7589.1,prot_S-promiscuus_M_contig27.7912.1,prot_S-promiscuus_M_contig31.9995.1,prot_S-promiscuus_M_contig31.9998.1,prot_S-promiscuus_M_contig35.10843.1,prot_S-promiscuus_M_contig35.10860.1,prot_S-promiscuus_M_contig35.10861.1,pro…	SJ02441,SJ03308,SJ05494,SJ06516,SJ06517,SJ07425,SJ10837,SJ14004,SJ14330,SJ19844,SJ21824	prot_S-latissima_F_contig118.1413.1,prot_S-latissima_F_contig1332.2499.1,prot_S-latissima_F_contig217.6627.1,prot_S-latissima_F_contig217.6628.1,prot_S-latissima_F_contig237.7419.1,prot_S-latissima_F_contig641.14220.1	prot_S-rigidula_F_contig16484.1.1,prot_S-rigidula_F_contig1884.1.2
OG0000114	FALSE	prot_D-dichotoma_M_contig1848.5502.1,prot_D-dichotoma_M_contig5243.15741.1	NA	prot_M-pyrifera_M_contig15912.6699.1	prot_M-clavaeformis_F_contig1526.3888.1,prot_M-clavaeformis_F_contig18175.5454.1,prot_M-clavaeformis_F_contig8216.19467.1	prot_P-littoralis_Contig103.9.1,prot_P-littoralis_Contig173.1.1,prot_P-littoralis_Contig173.3.1,prot_P-littoralis_Contig173.84.1,prot_P-littoralis_Contig364.1.1	prot_S-polyschides_M_contig2089.6884.1,prot_S-polyschides_M_contig34667.11230.1,prot_S-polyschides_M_contig53342.14468.1,prot_S-polyschides_M_contig68286.16446.1,prot_S-polyschides_M_contig85519.18308.1,prot_S-polyschides_M_contig988.19640.1	prot_S-promiscuus_M_contig1.170.1,prot_S-promiscuus_M_contig37.11336.1	SJ01533,SJ01702,SJ02366,SJ02834,SJ03886,SJ04632,SJ04637,SJ05534,SJ06325,SJ06429,SJ08351,SJ09043,SJ10445,SJ10466,SJ11185,SJ12742,SJ13980,SJ14887,SJ15217,SJ15251,SJ15252,SJ16290,SJ16459,SJ17369,SJ17490,SJ20131,SJ20238,SJ22544	prot_S-latissima_F_contig1503.3575.1,prot_S-latissima_F_contig1698.4544.1,prot_S-latissima_F_contig281.8751.1	prot_S-rigidula_F_contig10011.2.1,prot_S-rigidula_F_contig11152.1.1,prot_S-rigidula_F_contig11964.1.1,prot_S-rigidula_F_contig14001.4.1,prot_S-rigidula_F_contig14138.3.1,prot_S-rigidula_F_contig21097.1.1,prot_S-rigidula_F_contig21138.3.1,prot_S-rigidula_F_contig26914.1.1
OG0000115	FALSE	prot_D-dichotoma_M_contig304.10533.1	Ec-06_007350.1	prot_M-pyrifera_M_contig101172.252.1	prot_M-clavaeformis_F_contig12185.1892.1,prot_M-clavaeformis_F_contig3200.10385.1,prot_M-clavaeformis_F_contig401.12487.1	prot_P-littoralis_Contig1197.23.1,prot_P-littoralis_Contig1218.4.1,prot_P-littoralis_Contig1295.16.1,prot_P-littoralis_Contig1320.4.1,prot_P-littoralis_Contig151.69.1,prot_P-littoralis_Contig328.65.1,prot_P-littoralis_Contig344.37.1,prot_P-littoralis_Contig368.33.1,prot_P-littoralis_Contig479.85.1,prot_P-littoralis_Contig5.121.1,prot_P-littoralis_Contig658.14.1,prot_P-littoralis_Contig710.14.1,pr…	prot_S-polyschides_M_contig132485.2862.1,prot_S-polyschides_M_contig59701.15352.1	NA	SJ00080,SJ00257,SJ01893,SJ02215,SJ02224,SJ04531,SJ07015,SJ07097,SJ08899,SJ09149,SJ09300,SJ09306,SJ09508,SJ09918,SJ10565,SJ10575,SJ11528,SJ12239,SJ13093,SJ13925,SJ14234,SJ14468,SJ15838,SJ16343,SJ18150,SJ19678,SJ20400,SJ20703,SJ22190	NA	prot_S-rigidula_F_contig18763.3.1,prot_S-rigidula_F_contig23064.4.1,prot_S-rigidula_F_contig23086.1.1,prot_S-rigidula_F_contig2367.1.1,prot_S-rigidula_F_contig8907.1.1
OG0000116	FALSE	prot_D-dichotoma_M_contig1085.727.1,prot_D-dichotoma_M_contig1085.728.1,prot_D-dichotoma_M_contig1085.729.1,prot_D-dichotoma_M_contig117.1397.1,prot_D-dichotoma_M_contig1200.1637.1,prot_D-dichotoma_M_contig1279.2140.1,prot_D-dichotoma_M_contig131.2400.1,prot_D-dichotoma_M_contig1489.3499.1,prot_D-dichotoma_M_contig1503.3616.1,prot_D-dichotoma_M_contig1550.3872.1,prot_D-dichotoma_M_contig1600.4197…	NA	NA	NA	NA	NA	NA	NA	NA	NA
OG0000117	FALSE	prot_D-dichotoma_M_contig1119.1018.1,prot_D-dichotoma_M_contig1209.1684.1,prot_D-dichotoma_M_contig1455.3335.1,prot_D-dichotoma_M_contig1752.5050.1,prot_D-dichotoma_M_contig205.6565.1,prot_D-dichotoma_M_contig2184.7256.1,prot_D-dichotoma_M_contig2268.7601.1,prot_D-dichotoma_M_contig2313.7835.1,prot_D-dichotoma_M_contig232.7865.1,prot_D-dichotoma_M_contig2705.9349.1,prot_D-dichotoma_M_contig2934.1…	NA	prot_M-pyrifera_M_contig116457.3427.1	prot_M-clavaeformis_F_contig8948.20223.1	prot_P-littoralis_Contig1021.26.1,prot_P-littoralis_Contig121.45.1,prot_P-littoralis_Contig1377.13.2,prot_P-littoralis_Contig14.240.3,prot_P-littoralis_Contig174.117.3,prot_P-littoralis_Contig305.73.1,prot_P-littoralis_Contig31.71.1,prot_P-littoralis_Contig365.33.1,prot_P-littoralis_Contig421.9.1,prot_P-littoralis_Contig447.55.1,prot_P-littoralis_Contig500.2.1,prot_P-littoralis_Contig506.36.2,pro…	prot_S-polyschides_M_contig134778.3023.1,prot_S-polyschides_M_contig73158.17013.1	NA	SJ18092	prot_S-latissima_F_contig177.4904.1	prot_S-rigidula_F_contig13814.1.1,prot_S-rigidula_F_contig22783.1.2,prot_S-rigidula_F_contig26944.2.1,prot_S-rigidula_F_contig6453.5.1
OG0000118	FALSE	prot_D-dichotoma_M_contig118.1459.1,prot_D-dichotoma_M_contig150.3601.1,prot_D-dichotoma_M_contig4980.15222.1	Ec-05_006560.1,Ec-05_006660.1,Ec-08_003920.1,Ec-08_005010.1,Ec-15_001590.1,Ec-15_004990.1,Ec-21_004080.1,Ec-25_000170.1	NA	prot_M-clavaeformis_F_contig172.4976.1,prot_M-clavaeformis_F_contig2883.9422.1,prot_M-clavaeformis_F_contig29.9483.1,prot_M-clavaeformis_F_contig2967.9666.1,prot_M-clavaeformis_F_contig549.15507.1,prot_M-clavaeformis_F_contig748.18572.1,prot_M-clavaeformis_F_contig815.19398.1	prot_P-littoralis_Contig255.52.3,prot_P-littoralis_Contig3.1.1,prot_P-littoralis_Contig470.2.2,prot_P-littoralis_Contig522.2.9,prot_P-littoralis_Contig673.37.11	prot_S-polyschides_M_contig15769.4472.1	prot_S-promiscuus_M_contig1.43.1,prot_S-promiscuus_M_contig1.44.1,prot_S-promiscuus_M_contig11.1342.1,prot_S-promiscuus_M_contig12.1848.1,prot_S-promiscuus_M_contig15.3165.1,prot_S-promiscuus_M_contig15.3166.1,prot_S-promiscuus_M_contig15.3167.1,prot_S-promiscuus_M_contig28.8098.1,prot_S-promiscuus_M_contig29.8542.1,prot_S-promiscuus_M_contig29.8650.1,prot_S-promiscuus_M_contig29.8652.1,prot_S-pr…	SJ02153,SJ03123,SJ07029,SJ08743,SJ09661,SJ09663,SJ09674,SJ09679,SJ13474,SJ16904,SJ20239,SJ20240,SJ20241	prot_S-latissima_F_contig1274.2074.1,prot_S-latissima_F_contig1274.2075.1,prot_S-latissima_F_contig129.2186.1,prot_S-latissima_F_contig682.14657.1	prot_S-rigidula_F_contig17000.1.1
OG0000119	FALSE	prot_D-dichotoma_M_contig168.4649.1,prot_D-dichotoma_M_contig1849.5504.1	Ec-21_000930.1,Ec-21_000970.1,Ec-21_000980.1,Ec-21_003360.1,Ec-27_007030.1,Ec-27_007040.1	NA	prot_M-clavaeformis_F_contig1013.200.1,prot_M-clavaeformis_F_contig1042.447.1,prot_M-clavaeformis_F_contig1042.448.1,prot_M-clavaeformis_F_contig1042.449.1,prot_M-clavaeformis_F_contig197.6076.1,prot_M-clavaeformis_F_contig4117.12737.1,prot_M-clavaeformis_F_contig563.15733.1,prot_M-clavaeformis_F_contig563.15734.1	prot_P-littoralis_Contig1066.13.2,prot_P-littoralis_Contig1066.15.4,prot_P-littoralis_Contig1095.1.23,prot_P-littoralis_Contig1095.1.5,prot_P-littoralis_Contig1095.14.1,prot_P-littoralis_Contig1095.9.1,prot_P-littoralis_Contig1257.6.7,prot_P-littoralis_Contig35.169.1,prot_P-littoralis_Contig35.222.3,prot_P-littoralis_Contig447.41.2,prot_P-littoralis_Contig811.12.1,prot_P-littoralis_Contig811.26.1…	prot_S-polyschides_M_contig1223.2094.1,prot_S-polyschides_M_contig1223.2095.1,prot_S-polyschides_M_contig1223.2096.1,prot_S-polyschides_M_contig2112.6984.1,prot_S-polyschides_M_contig2247.7608.1,prot_S-polyschides_M_contig23309.7908.1,prot_S-polyschides_M_contig2598.8850.1,prot_S-polyschides_M_contig2995.9988.1,prot_S-polyschides_M_contig422.12741.1,prot_S-polyschides_M_contig839.18107.1	prot_S-promiscuus_M_contig19.4372.1,prot_S-promiscuus_M_contig19.4373.1,prot_S-promiscuus_M_contig32.10243.1	SJ07439,SJ15475,SJ15478,SJ15479,SJ15481,SJ17247	prot_S-latissima_F_contig1339.2517.1,prot_S-latissima_F_contig2789.8663.1,prot_S-latissima_F_contig285.8881.1,prot_S-latissima_F_contig285.8882.1,prot_S-latissima_F_contig285.8885.1,prot_S-latissima_F_contig3079.9439.1	prot_S-rigidula_F_contig239.1.1
OG0000120	FALSE	NA	Ec-07_007580.1,Ec-12_006330.1	prot_M-pyrifera_M_contig3691.11207.1,prot_M-pyrifera_M_contig9199.21297.1	NA	prot_P-littoralis_Contig394.52.2,prot_P-littoralis_Contig394.55.1,prot_P-littoralis_Contig606.23.3,prot_P-littoralis_Contig606.30.2	prot_S-polyschides_M_contig10538.485.1,prot_S-polyschides_M_contig15041.4013.1,prot_S-polyschides_M_contig16461.4857.1,prot_S-polyschides_M_contig56525.14921.1	prot_S-promiscuus_M_contig30.9783.1,prot_S-promiscuus_M_contig30.9788.1,prot_S-promiscuus_M_contig40.12799.1,prot_S-promiscuus_M_contig5.14354.1,prot_S-promiscuus_M_contig5.14357.1	SJ01984,SJ01986,SJ01992,SJ02008,SJ02026,SJ03957,SJ03958,SJ04511,SJ04512,SJ06030,SJ06031,SJ12754,SJ12755,SJ12758,SJ12759,SJ12763,SJ14421,SJ17708,SJ18990,SJ18991,SJ20189,SJ20194,SJ21409,SJ22165	prot_S-latissima_F_contig1222.1732.1,prot_S-latissima_F_contig125.1908.1,prot_S-latissima_F_contig1874.5348.1,prot_S-latissima_F_contig191.5530.1,prot_S-latissima_F_contig191.5532.1,prot_S-latissima_F_contig191.5533.1,prot_S-latissima_F_contig1971.5799.1,prot_S-latissima_F_contig251.7892.1,prot_S-latissima_F_contig251.7893.1,prot_S-latissima_F_contig251.7894.1,prot_S-latissima_F_contig251.7895.1,…	NA
OG0000121	FALSE	NA	NA	NA	NA	prot_P-littoralis_Contig105.37.1,prot_P-littoralis_Contig110.55.1,prot_P-littoralis_Contig123.110.2,prot_P-littoralis_Contig138.5.1,prot_P-littoralis_Contig161.71.1,prot_P-littoralis_Contig38.88.1,prot_P-littoralis_Contig44.51.1	prot_S-polyschides_M_contig69776.16625.1	NA	SJ01742,SJ03049,SJ05188,SJ12916,SJ17723,SJ18361	prot_S-latissima_F_contig272.8486.1	prot_S-rigidula_F_contig10447.1.1,prot_S-rigidula_F_contig10624.1.1,prot_S-rigidula_F_contig1157.2.1,prot_S-rigidula_F_contig11988.2.1,prot_S-rigidula_F_contig12053.1.1,prot_S-rigidula_F_contig12337.1.1,prot_S-rigidula_F_contig13350.1.1,prot_S-rigidula_F_contig13641.2.1,prot_S-rigidula_F_contig13700.1.1,prot_S-rigidula_F_contig14579.1.1,prot_S-rigidula_F_contig15189.1.1,prot_S-rigidula_F_contig15…
OG0000122	FALSE	prot_D-dichotoma_M_contig3611.12171.1,prot_D-dichotoma_M_contig759.18416.1	Ec-03_002200.1,Ec-09_003640.1	prot_M-pyrifera_M_contig17562.7158.1,prot_M-pyrifera_M_contig2119.8068.1,prot_M-pyrifera_M_contig25625.9057.1,prot_M-pyrifera_M_contig40589.11780.1,prot_M-pyrifera_M_contig5894.14763.1	prot_M-clavaeformis_F_contig330.10658.1,prot_M-clavaeformis_F_contig526.15116.1,prot_M-clavaeformis_F_contig6.16345.1	prot_P-littoralis_Contig582.33.1	prot_S-polyschides_M_contig1064.568.1,prot_S-polyschides_M_contig3572.11439.1,prot_S-polyschides_M_contig42927.12866.1,prot_S-polyschides_M_contig4640.13466.1,prot_S-polyschides_M_contig5063.14099.1,prot_S-polyschides_M_contig92351.19033.1	prot_S-promiscuus_M_contig33.10511.1,prot_S-promiscuus_M_contig33.10512.1,prot_S-promiscuus_M_contig33.10539.1,prot_S-promiscuus_M_contig34.10742.1,prot_S-promiscuus_M_contig34.10743.1,prot_S-promiscuus_M_contig6.16088.1,prot_S-promiscuus_M_contig6.16089.1,prot_S-promiscuus_M_contig6.16090.1,prot_S-promiscuus_M_contig6.16091.1,prot_S-promiscuus_M_contig6.16093.1,prot_S-promiscuus_M_contig6.16094.…	SJ01165,SJ04013,SJ11848,SJ11849,SJ18957,SJ18958,SJ18959,SJ18960,SJ18964,SJ21872,SJ21875,SJ21876	prot_S-latissima_F_contig196.5728.1,prot_S-latissima_F_contig196.5729.1,prot_S-latissima_F_contig196.5730.1,prot_S-latissima_F_contig196.5732.1,prot_S-latissima_F_contig196.5733.1,prot_S-latissima_F_contig333.9989.1,prot_S-latissima_F_contig333.9990.1,prot_S-latissima_F_contig333.9991.1,prot_S-latissima_F_contig707.14909.1,prot_S-latissima_F_contig953.17264.1	prot_S-rigidula_F_contig15569.3.1,prot_S-rigidula_F_contig15569.4.1,prot_S-rigidula_F_contig27177.1.1
OG0000123	FALSE	prot_D-dichotoma_M_contig1026.306.1,prot_D-dichotoma_M_contig1119.1020.1,prot_D-dichotoma_M_contig1289.2197.1,prot_D-dichotoma_M_contig1334.2554.1,prot_D-dichotoma_M_contig149.3509.1,prot_D-dichotoma_M_contig1825.5410.1,prot_D-dichotoma_M_contig212.6947.1,prot_D-dichotoma_M_contig2205.7364.1,prot_D-dichotoma_M_contig2288.7699.1,prot_D-dichotoma_M_contig2429.8316.1,prot_D-dichotoma_M_contig2586.89…	NA	NA	prot_M-clavaeformis_F_contig2361.7645.1,prot_M-clavaeformis_F_contig2361.7646.1	prot_P-littoralis_Contig1063.10.1,prot_P-littoralis_Contig1133.9.1,prot_P-littoralis_Contig1280.6.1,prot_P-littoralis_Contig15.152.1,prot_P-littoralis_Contig1505.1.2,prot_P-littoralis_Contig193.42.1,prot_P-littoralis_Contig215.95.1,prot_P-littoralis_Contig555.7.1,prot_P-littoralis_Contig691.17.1,prot_P-littoralis_Contig812.22.1,prot_P-littoralis_Contig930.12.1,prot_P-littoralis_Contig941.1.1	NA	NA	SJ08288	prot_S-latissima_F_contig3823.10843.1	NA
OG0000124	FALSE	prot_D-dichotoma_M_contig2914.10087.1,prot_D-dichotoma_M_contig3838.12722.1	Ec-01_001850.1,Ec-01_002500.1,Ec-02_003690.1	prot_M-pyrifera_M_contig23092.8515.1,prot_M-pyrifera_M_contig299.9916.1	prot_M-clavaeformis_F_contig1563.4102.1,prot_M-clavaeformis_F_contig3891.12186.1,prot_M-clavaeformis_F_contig502.14657.1,prot_M-clavaeformis_F_contig845.19714.1	prot_P-littoralis_Contig1079.2.30,prot_P-littoralis_Contig290.51.4,prot_P-littoralis_Contig290.66.8	NA	prot_S-promiscuus_M_contig36.11269.1,prot_S-promiscuus_M_contig36.11290.1,prot_S-promiscuus_M_contig45.13724.1,prot_S-promiscuus_M_contig45.13725.1,prot_S-promiscuus_M_contig45.13731.1,prot_S-promiscuus_M_contig46.13903.1,prot_S-promiscuus_M_contig46.13905.1,prot_S-promiscuus_M_contig46.13906.1,prot_S-promiscuus_M_contig52.15334.1,prot_S-promiscuus_M_contig52.15336.1,prot_S-promiscuus_M_contig52.…	SJ00093,SJ00094,SJ00100,SJ00103,SJ00104,SJ02233,SJ12675,SJ18363,SJ22502	prot_S-latissima_F_contig136.2647.1,prot_S-latissima_F_contig20.5975.1,prot_S-latissima_F_contig203.6125.1,prot_S-latissima_F_contig203.6126.1,prot_S-latissima_F_contig203.6127.1,prot_S-latissima_F_contig2263.6992.1	prot_S-rigidula_F_contig1207.1.1,prot_S-rigidula_F_contig1207.3.1,prot_S-rigidula_F_contig1207.4.1,prot_S-rigidula_F_contig1588.6.1,prot_S-rigidula_F_contig1588.7.1,prot_S-rigidula_F_contig17105.1.1,prot_S-rigidula_F_contig5364.1.1
OG0000125	FALSE	prot_D-dichotoma_M_contig1340.2589.1,prot_D-dichotoma_M_contig1546.3844.1	Ec-01_004440.1,Ec-06_005000.1,Ec-07_000330.1,Ec-07_000410.1,Ec-11_005250.1,Ec-16_000320.1,Ec-16_000350.1,Ec-28_001710.1	prot_M-pyrifera_M_contig12164.4448.1,prot_M-pyrifera_M_contig15121.6465.1	prot_M-clavaeformis_F_contig1098.938.1,prot_M-clavaeformis_F_contig173.5034.1,prot_M-clavaeformis_F_contig190.5795.1,prot_M-clavaeformis_F_contig2151.6883.1,prot_M-clavaeformis_F_contig313.10190.1,prot_M-clavaeformis_F_contig3996.12432.1,prot_M-clavaeformis_F_contig4498.13546.1,prot_M-clavaeformis_F_contig480.14185.1,prot_M-clavaeformis_F_contig5795.16001.1,prot_M-clavaeformis_F_contig958.20889.1	prot_P-littoralis_Contig109.92.1,prot_P-littoralis_Contig134.67.4,prot_P-littoralis_Contig178.16.2,prot_P-littoralis_Contig196.44.2,prot_P-littoralis_Contig277.22.1,prot_P-littoralis_Contig277.67.1,prot_P-littoralis_Contig300.54.1,prot_P-littoralis_Contig415.17.1,prot_P-littoralis_Contig760.30.1,prot_P-littoralis_Contig760.8.2	prot_S-polyschides_M_contig411.12546.1,prot_S-polyschides_M_contig46656.13510.1,prot_S-polyschides_M_contig65254.16066.1,prot_S-polyschides_M_contig68246.16444.1,prot_S-polyschides_M_contig9583.19373.1	prot_S-promiscuus_M_contig14.2932.1,prot_S-promiscuus_M_contig2.4880.1,prot_S-promiscuus_M_contig2.5043.1,prot_S-promiscuus_M_contig51.15228.1,prot_S-promiscuus_M_contig7.17186.1,prot_S-promiscuus_M_contig7.17190.1,prot_S-promiscuus_M_contig7.17191.1	SJ02027,SJ21667,SJ21668	prot_S-latissima_F_contig1434.3163.1,prot_S-latissima_F_contig2294.7091.1,prot_S-latissima_F_contig2949.9075.1,prot_S-latissima_F_contig2949.9076.1,prot_S-latissima_F_contig321.9735.1	prot_S-rigidula_F_contig1884.5.1,prot_S-rigidula_F_contig4408.1.1,prot_S-rigidula_F_contig660.1.1,prot_S-rigidula_F_contig9674.1.1
OG0000126	FALSE	prot_D-dichotoma_M_contig1204.1658.1,prot_D-dichotoma_M_contig1497.3553.1,prot_D-dichotoma_M_contig1975.6125.1,prot_D-dichotoma_M_contig20.6307.1,prot_D-dichotoma_M_contig20.6309.1,prot_D-dichotoma_M_contig21.6847.1,prot_D-dichotoma_M_contig2170.7203.1,prot_D-dichotoma_M_contig2658.9153.1,prot_D-dichotoma_M_contig27.9306.1,prot_D-dichotoma_M_contig3199.11022.1,prot_D-dichotoma_M_contig3232.11156.…	NA	NA	prot_M-clavaeformis_F_contig11143.1101.1,prot_M-clavaeformis_F_contig14676.3511.1,prot_M-clavaeformis_F_contig15864.4237.1,prot_M-clavaeformis_F_contig6473.17096.1	prot_P-littoralis_Contig230.88.1	prot_S-polyschides_M_contig103019.278.1,prot_S-polyschides_M_contig5749.15052.1	NA	SJ05428	prot_S-latissima_F_contig1.2.1	prot_S-rigidula_F_contig10463.2.1,prot_S-rigidula_F_contig11784.1.1,prot_S-rigidula_F_contig13048.2.1,prot_S-rigidula_F_contig13512.1.1,prot_S-rigidula_F_contig15003.1.1,prot_S-rigidula_F_contig15732.2.1,prot_S-rigidula_F_contig16115.1.1,prot_S-rigidula_F_contig16942.1.1,prot_S-rigidula_F_contig17430.1.1,prot_S-rigidula_F_contig18426.1.1,prot_S-rigidula_F_contig18480.1.1,prot_S-rigidula_F_contig1…
OG0000127	FALSE	prot_D-dichotoma_M_contig1412.3058.1,prot_D-dichotoma_M_contig2271.7636.1,prot_D-dichotoma_M_contig2271.7637.1,prot_D-dichotoma_M_contig2271.7639.1,prot_D-dichotoma_M_contig252.8677.1,prot_D-dichotoma_M_contig2533.8716.1	Ec-00_003780.1,Ec-00_007099.1,Ec-19_003010.1	NA	NA	prot_P-littoralis_Contig110.47.1,prot_P-littoralis_Contig1136.15.1,prot_P-littoralis_Contig116.88.2,prot_P-littoralis_Contig1197.10.1,prot_P-littoralis_Contig1209.22.2,prot_P-littoralis_Contig123.1.2,prot_P-littoralis_Contig128.66.1,prot_P-littoralis_Contig1564.4.1,prot_P-littoralis_Contig18.46.1,prot_P-littoralis_Contig18.49.1,prot_P-littoralis_Contig266.27.1,prot_P-littoralis_Contig266.29.1,pro…	prot_S-polyschides_M_contig54728.14644.1,prot_S-polyschides_M_contig90132.18833.1	prot_S-promiscuus_M_contig1.106.1,prot_S-promiscuus_M_contig13.2284.1,prot_S-promiscuus_M_contig22.6414.1,prot_S-promiscuus_M_contig9.18683.1	NA	prot_S-latissima_F_contig1045.405.1,prot_S-latissima_F_contig365.10556.1	prot_S-rigidula_F_contig14553.1.1,prot_S-rigidula_F_contig26891.1.1,prot_S-rigidula_F_contig26965.1.1,prot_S-rigidula_F_contig27054.1.2,prot_S-rigidula_F_contig5202.1.1,prot_S-rigidula_F_contig5202.1.5,prot_S-rigidula_F_contig8849.1.1
OG0000128	FALSE	prot_D-dichotoma_M_contig2035.6499.1,prot_D-dichotoma_M_contig324.11176.1	Ec-02_000530.1,Ec-02_001110.1,Ec-03_004290.1,Ec-11_003380.1,Ec-11_003390.1,Ec-11_003400.1,Ec-11_003420.1,Ec-11_003430.1,Ec-11_003440.1,Ec-11_003450.1,Ec-11_003470.1,Ec-11_003510.1,Ec-20_003130.1,Ec-20_003140.1,Ec-20_003180.1,Ec-20_003190.1,Ec-26_005170.1	prot_M-pyrifera_M_contig19984.7786.1,prot_M-pyrifera_M_contig39243.11597.1,prot_M-pyrifera_M_contig5514.14107.1,prot_M-pyrifera_M_contig5585.14217.1	prot_M-clavaeformis_F_contig1116.1109.1,prot_M-clavaeformis_F_contig1195.1714.1,prot_M-clavaeformis_F_contig3820.12032.1,prot_M-clavaeformis_F_contig443.13422.1,prot_M-clavaeformis_F_contig75.18599.1,prot_M-clavaeformis_F_contig75.18600.1,prot_M-clavaeformis_F_contig75.18601.1	prot_P-littoralis_Contig1047.1.1,prot_P-littoralis_Contig212.17.2,prot_P-littoralis_Contig27.88.1,prot_P-littoralis_Contig27.97.4,prot_P-littoralis_Contig299.65.1	prot_S-polyschides_M_contig1069.611.1,prot_S-polyschides_M_contig24155.8237.1,prot_S-polyschides_M_contig33632.10924.1,prot_S-polyschides_M_contig966.19450.1	prot_S-promiscuus_M_contig27.7920.1,prot_S-promiscuus_M_contig43.13396.1,prot_S-promiscuus_M_contig50.15110.1,prot_S-promiscuus_M_contig8.18346.1,prot_S-promiscuus_M_contig8.18348.1	SJ04915,SJ15554,SJ15627,SJ21780	prot_S-latissima_F_contig12.1545.1,prot_S-latissima_F_contig132.2428.1,prot_S-latissima_F_contig2280.7055.1,prot_S-latissima_F_contig2280.7056.1,prot_S-latissima_F_contig3238.9811.1,prot_S-latissima_F_contig449.11903.1	prot_S-rigidula_F_contig3422.1.1
OG0000129	FALSE	prot_D-dichotoma_M_contig1283.2165.1,prot_D-dichotoma_M_contig1283.2167.1,prot_D-dichotoma_M_contig1283.2168.1,prot_D-dichotoma_M_contig3978.13052.1,prot_D-dichotoma_M_contig501.15333.1,prot_D-dichotoma_M_contig57.16462.1	Ec-03_004230.1,Ec-03_004240.1,Ec-03_004280.1,Ec-10_002530.1,Ec-22_001790.1,Ec-22_003060.1	prot_M-pyrifera_M_contig17708.7187.1,prot_M-pyrifera_M_contig21964.8257.1,prot_M-pyrifera_M_contig65539.15929.1	prot_M-clavaeformis_F_contig2724.8942.1,prot_M-clavaeformis_F_contig3477.11123.1,prot_M-clavaeformis_F_contig352.11238.1,prot_M-clavaeformis_F_contig515.14912.1,prot_M-clavaeformis_F_contig515.14914.1,prot_M-clavaeformis_F_contig6542.17179.1	prot_P-littoralis_Contig1053.15.1,prot_P-littoralis_Contig1155.1.18,prot_P-littoralis_Contig508.10.1,prot_P-littoralis_Contig59.8.1	prot_S-polyschides_M_contig16816.5051.1,prot_S-polyschides_M_contig3142.10373.1,prot_S-polyschides_M_contig6683.16279.1,prot_S-polyschides_M_contig87.18449.1	prot_S-promiscuus_M_contig27.7921.1,prot_S-promiscuus_M_contig37.11487.1,prot_S-promiscuus_M_contig39.11872.1,prot_S-promiscuus_M_contig39.11873.1,prot_S-promiscuus_M_contig39.11874.1,prot_S-promiscuus_M_contig39.11875.1,prot_S-promiscuus_M_contig39.11876.1,prot_S-promiscuus_M_contig43.13308.1,prot_S-promiscuus_M_contig8.18036.1,prot_S-promiscuus_M_contig9.18698.1	SJ05122,SJ09104,SJ14859,SJ14860,SJ17604,SJ21246,SJ21250,SJ21252,SJ22256	prot_S-latissima_F_contig258.8068.1,prot_S-latissima_F_contig990.17617.1	prot_S-rigidula_F_contig1066.2.1,prot_S-rigidula_F_contig1066.4.1,prot_S-rigidula_F_contig4656.1.1,prot_S-rigidula_F_contig6731.3.1,prot_S-rigidula_F_contig9599.1.1
OG0000130	FALSE	NA	NA	prot_M-pyrifera_M_contig1198.4069.1,prot_M-pyrifera_M_contig12019.4164.1,prot_M-pyrifera_M_contig12072.4264.1,prot_M-pyrifera_M_contig2010.7824.1,prot_M-pyrifera_M_contig24350.8795.1,prot_M-pyrifera_M_contig4256.12071.1,prot_M-pyrifera_M_contig716.17066.1,prot_M-pyrifera_M_contig98.22567.1	NA	NA	NA	prot_S-promiscuus_M_contig72.17655.1	SJ01584,SJ01895,SJ03282,SJ04615,SJ05924,SJ06733,SJ06923,SJ09406,SJ09418,SJ11723,SJ13080,SJ13083,SJ14257,SJ20219,SJ20962	prot_S-latissima_F_contig1116.940.1,prot_S-latissima_F_contig1116.942.1,prot_S-latissima_F_contig1309.2341.1,prot_S-latissima_F_contig1317.2406.1,prot_S-latissima_F_contig1317.2407.1,prot_S-latissima_F_contig1411.3016.1,prot_S-latissima_F_contig1437.3177.1,prot_S-latissima_F_contig1859.5296.1,prot_S-latissima_F_contig201.6037.1,prot_S-latissima_F_contig201.6039.1,prot_S-latissima_F_contig201.6041…	prot_S-rigidula_F_contig3525.1.4
OG0000131	FALSE	NA	Ec-01_001310.1,Ec-05_006420.1,Ec-08_004560.1,Ec-16_001060.1	prot_M-pyrifera_M_contig3078.10100.1	prot_M-clavaeformis_F_contig12100.1842.1,prot_M-clavaeformis_F_contig13012.2479.1,prot_M-clavaeformis_F_contig1997.6185.1,prot_M-clavaeformis_F_contig3982.12405.1,prot_M-clavaeformis_F_contig7692.18845.1,prot_M-clavaeformis_F_contig7692.18846.1,prot_M-clavaeformis_F_contig8775.20046.1	prot_P-littoralis_Contig1154.4.2,prot_P-littoralis_Contig1233.6.1,prot_P-littoralis_Contig1233.7.1,prot_P-littoralis_Contig1233.8.1,prot_P-littoralis_Contig129.49.1,prot_P-littoralis_Contig13.45.1,prot_P-littoralis_Contig132.105.1,prot_P-littoralis_Contig134.9.1,prot_P-littoralis_Contig22.3.1,prot_P-littoralis_Contig240.25.1,prot_P-littoralis_Contig265.1.1,prot_P-littoralis_Contig276.29.1,prot_P-…	prot_S-polyschides_M_contig26661.9075.1,prot_S-polyschides_M_contig49061.13873.1,prot_S-polyschides_M_contig63977.15918.1	prot_S-promiscuus_M_contig23.6700.1,prot_S-promiscuus_M_contig24.7043.1,prot_S-promiscuus_M_contig28.8122.1,prot_S-promiscuus_M_contig9.19107.1	SJ02936	prot_S-latissima_F_contig2328.7243.1,prot_S-latissima_F_contig348.10245.1,prot_S-latissima_F_contig411.11332.1,prot_S-latissima_F_contig565.13402.1	prot_S-rigidula_F_contig519.1.1,prot_S-rigidula_F_contig519.3.2
OG0000132	FALSE	prot_D-dichotoma_M_contig1088.750.1,prot_D-dichotoma_M_contig1189.1514.1,prot_D-dichotoma_M_contig1189.1515.1,prot_D-dichotoma_M_contig1424.3117.1,prot_D-dichotoma_M_contig1424.3118.1,prot_D-dichotoma_M_contig1424.3119.1,prot_D-dichotoma_M_contig2942.10169.1,prot_D-dichotoma_M_contig3068.10615.1,prot_D-dichotoma_M_contig385.12755.1,prot_D-dichotoma_M_contig789.18706.1,prot_D-dichotoma_M_contig789…	Ec-00_000320.1,Ec-06_002520.1,Ec-06_008030.1,Ec-09_003670.1,Ec-13_000340.1	prot_M-pyrifera_M_contig8790.20431.1	prot_M-clavaeformis_F_contig2309.7444.1,prot_M-clavaeformis_F_contig264.8648.1,prot_M-clavaeformis_F_contig3930.12292.1,prot_M-clavaeformis_F_contig4348.13228.1,prot_M-clavaeformis_F_contig4389.13320.1	prot_P-littoralis_Contig716.1.1,prot_P-littoralis_Contig871.26.1	prot_S-polyschides_M_contig24922.8509.1,prot_S-polyschides_M_contig482.13752.1,prot_S-polyschides_M_contig482.13753.1,prot_S-polyschides_M_contig482.13754.1,prot_S-polyschides_M_contig859.18341.1,prot_S-polyschides_M_contig859.18342.1	prot_S-promiscuus_M_contig3.8967.1,prot_S-promiscuus_M_contig3.8968.1,prot_S-promiscuus_M_contig3.8969.1,prot_S-promiscuus_M_contig3.9359.1,prot_S-promiscuus_M_contig3.9360.1,prot_S-promiscuus_M_contig3.9362.1	SJ06139,SJ12557,SJ14641,SJ20157,SJ22284,SJ22285,SJ22286,SJ22287,SJ22288,SJ22289	prot_S-latissima_F_contig1006.73.1,prot_S-latissima_F_contig1932.5637.1,prot_S-latissima_F_contig2167.6620.1,prot_S-latissima_F_contig411.11330.1,prot_S-latissima_F_contig411.11331.1,prot_S-latissima_F_contig811.15972.1	prot_S-rigidula_F_contig18802.1.1,prot_S-rigidula_F_contig8366.1.1
OG0000133	FALSE	prot_D-dichotoma_M_contig577.16566.1,prot_D-dichotoma_M_contig72.18101.1,prot_D-dichotoma_M_contig72.18102.1	Ec-22_000910.1	prot_M-pyrifera_M_contig14541.6296.1	prot_M-clavaeformis_F_contig3355.10798.1,prot_M-clavaeformis_F_contig4887.14352.1,prot_M-clavaeformis_F_contig5346.15279.1,prot_M-clavaeformis_F_contig9518.20834.1	NA	prot_S-polyschides_M_contig1034.315.1,prot_S-polyschides_M_contig2487.8485.1	prot_S-promiscuus_M_contig1.225.1,prot_S-promiscuus_M_contig10.948.1,prot_S-promiscuus_M_contig20.5752.1,prot_S-promiscuus_M_contig24.7218.1,prot_S-promiscuus_M_contig24.7222.1,prot_S-promiscuus_M_contig26.7494.1,prot_S-promiscuus_M_contig28.8078.1,prot_S-promiscuus_M_contig3.9561.1,prot_S-promiscuus_M_contig33.10369.1,prot_S-promiscuus_M_contig33.10405.1,prot_S-promiscuus_M_contig37.11398.1,prot…	SJ01964,SJ02290,SJ02354,SJ06182,SJ06183,SJ06184,SJ06824,SJ08138,SJ08139,SJ08970,SJ08971,SJ08974,SJ08975,SJ15243,SJ17600	prot_S-latissima_F_contig154.3782.1,prot_S-latissima_F_contig2092.6349.1,prot_S-latissima_F_contig416.11395.1,prot_S-latissima_F_contig540.13140.1	NA
OG0000134	FALSE	NA	Ec-00_003670.1,Ec-00_003840.1,Ec-05_000170.1,Ec-05_000620.1,Ec-05_003270.1,Ec-10_000020.1,Ec-11_001400.1,Ec-21_000790.1	prot_M-pyrifera_M_contig5593.14233.1	prot_M-clavaeformis_F_contig13799.2961.1,prot_M-clavaeformis_F_contig4811.14212.1,prot_M-clavaeformis_F_contig5586.15665.1,prot_M-clavaeformis_F_contig6324.16875.1,prot_M-clavaeformis_F_contig8357.19621.1	prot_P-littoralis_Contig1.442.2,prot_P-littoralis_Contig1000.13.1,prot_P-littoralis_Contig1002.26.1,prot_P-littoralis_Contig1038.7.1,prot_P-littoralis_Contig1076.5.1,prot_P-littoralis_Contig1106.11.1,prot_P-littoralis_Contig114.84.1,prot_P-littoralis_Contig1194.10.1,prot_P-littoralis_Contig1284.17.1,prot_P-littoralis_Contig1336.4.1,prot_P-littoralis_Contig1366.11.1,prot_P-littoralis_Contig146.48.…	prot_S-polyschides_M_contig1102.924.1,prot_S-polyschides_M_contig32296.10589.1	prot_S-promiscuus_M_contig1.209.1,prot_S-promiscuus_M_contig14.3099.1	SJ02874,SJ10832,SJ21736	prot_S-latissima_F_contig686.14678.1	NA
OG0000135	FALSE	NA	Ec-00_004160.1,Ec-00_007460.1,Ec-05_000400.1,Ec-06_007830.1,Ec-11_000810.1,Ec-26_001550.1,Ec-26_001560.1	prot_M-pyrifera_M_contig10303.635.1,prot_M-pyrifera_M_contig14519.6289.1,prot_M-pyrifera_M_contig1811.7304.1,prot_M-pyrifera_M_contig29054.9764.1	prot_M-clavaeformis_F_contig32.10374.1,prot_M-clavaeformis_F_contig4454.13472.1	prot_P-littoralis_Contig83.97.3,prot_P-littoralis_Contig83.98.3	prot_S-polyschides_M_contig2.6505.1,prot_S-polyschides_M_contig2645.8996.1,prot_S-polyschides_M_contig2645.8997.1,prot_S-polyschides_M_contig6342.15848.1,prot_S-polyschides_M_contig9866.19632.1	prot_S-promiscuus_M_contig14.3106.1,prot_S-promiscuus_M_contig3.9005.1,prot_S-promiscuus_M_contig37.11313.1,prot_S-promiscuus_M_contig37.11314.1,prot_S-promiscuus_M_contig47.13922.1,prot_S-promiscuus_M_contig47.13923.1,prot_S-promiscuus_M_contig58.15792.1,prot_S-promiscuus_M_contig58.15821.1,prot_S-promiscuus_M_contig58.15822.1,prot_S-promiscuus_M_contig58.15825.1,prot_S-promiscuus_M_contig58.158…	SJ02394,SJ03755,SJ04383,SJ05558,SJ05560,SJ06861,SJ06864,SJ09823,SJ11699,SJ11806,SJ16619,SJ20073,SJ20258,SJ21752	prot_S-latissima_F_contig177.4901.1,prot_S-latissima_F_contig1800.5086.1,prot_S-latissima_F_contig1876.5349.1,prot_S-latissima_F_contig1915.5554.1,prot_S-latissima_F_contig323.9801.1,prot_S-latissima_F_contig544.13165.1	prot_S-rigidula_F_contig18053.2.1
OG0000136	FALSE	NA	Ec-03_000690.1,Ec-03_001750.1,Ec-04_001000.1,Ec-06_011040.1,Ec-07_002210.1,Ec-10_006100.1,Ec-13_004000.1,Ec-13_004520.1,Ec-13_004830.1,Ec-15_004490.1,Ec-16_003650.1,Ec-19_000010.1,Ec-24_003650.1,Ec-25_003510.1,Ec-27_001880.1	prot_M-pyrifera_M_contig3233.10402.1,prot_M-pyrifera_M_contig85.19809.1	prot_M-clavaeformis_F_contig2733.8976.1	prot_P-littoralis_Contig1028.16.127,prot_P-littoralis_Contig161.47.1,prot_P-littoralis_Contig2.1.1,prot_P-littoralis_Contig286.66.1,prot_P-littoralis_Contig29.74.2,prot_P-littoralis_Contig335.38.5,prot_P-littoralis_Contig481.55.1,prot_P-littoralis_Contig49.74.4,prot_P-littoralis_Contig60.53.1,prot_P-littoralis_Contig614.5.2,prot_P-littoralis_Contig614.7.4,prot_P-littoralis_Contig646.1.42,prot_P-l…	NA	prot_S-promiscuus_M_contig5.14443.1	SJ02047,SJ04192,SJ04193,SJ05675,SJ07545,SJ15198,SJ15705,SJ15707,SJ15712,SJ15713	prot_S-latissima_F_contig192.5583.1,prot_S-latissima_F_contig281.8750.1,prot_S-latissima_F_contig30.9251.1,prot_S-latissima_F_contig516.12834.1,prot_S-latissima_F_contig57.13446.1,prot_S-latissima_F_contig57.13455.1,prot_S-latissima_F_contig703.14876.1	prot_S-rigidula_F_contig4490.1.4,prot_S-rigidula_F_contig7824.1.1,prot_S-rigidula_F_contig936.3.2,prot_S-rigidula_F_contig936.6.1
OG0000137	FALSE	prot_D-dichotoma_M_contig1362.2709.1,prot_D-dichotoma_M_contig264.9085.1,prot_D-dichotoma_M_contig4935.15153.1,prot_D-dichotoma_M_contig5048.15396.1,prot_D-dichotoma_M_contig715.18043.1	Ec-04_001460.1,Ec-22_000970.1,Ec-22_003590.1,Ec-22_003600.1,Ec-22_003800.1	prot_M-pyrifera_M_contig15827.6673.1	prot_M-clavaeformis_F_contig2174.6959.1,prot_M-clavaeformis_F_contig2200.7070.1,prot_M-clavaeformis_F_contig3178.10320.1,prot_M-clavaeformis_F_contig340.10933.1,prot_M-clavaeformis_F_contig3467.11101.1,prot_M-clavaeformis_F_contig5473.15486.1,prot_M-clavaeformis_F_contig6684.17396.1,prot_M-clavaeformis_F_contig7422.18499.1,prot_M-clavaeformis_F_contig889.20181.1	prot_P-littoralis_Contig144.19.2,prot_P-littoralis_Contig144.3.6,prot_P-littoralis_Contig144.57.1,prot_P-littoralis_Contig465.13.1,prot_P-littoralis_Contig465.4.4,prot_P-littoralis_Contig681.38.2,prot_P-littoralis_Contig892.5.1,prot_P-littoralis_Contig892.9.1	prot_S-polyschides_M_contig12453.2284.1	prot_S-promiscuus_M_contig3.8866.1,prot_S-promiscuus_M_contig39.11807.1,prot_S-promiscuus_M_contig39.11829.1,prot_S-promiscuus_M_contig39.11830.1,prot_S-promiscuus_M_contig39.11831.1,prot_S-promiscuus_M_contig39.11837.1,prot_S-promiscuus_M_contig39.11839.1,prot_S-promiscuus_M_contig42.13173.1	SJ02254,SJ09138,SJ13233,SJ14038,SJ14875,SJ15682,SJ15683	prot_S-latissima_F_contig240.7535.1,prot_S-latissima_F_contig85.16369.1	prot_S-rigidula_F_contig1244.1.2,prot_S-rigidula_F_contig1570.1.1,prot_S-rigidula_F_contig2773.1.1,prot_S-rigidula_F_contig3938.2.1,prot_S-rigidula_F_contig427.1.1,prot_S-rigidula_F_contig695.2.2,prot_S-rigidula_F_contig8145.1.1
OG0000138	FALSE	prot_D-dichotoma_M_contig1388.2856.1,prot_D-dichotoma_M_contig1545.3839.1,prot_D-dichotoma_M_contig2244.7520.1,prot_D-dichotoma_M_contig2320.7866.1,prot_D-dichotoma_M_contig2394.8164.1,prot_D-dichotoma_M_contig712.18028.1	Ec-27_003620.1	prot_M-pyrifera_M_contig10618.1339.1,prot_M-pyrifera_M_contig6787.16371.1	prot_M-clavaeformis_F_contig5985.16317.1	prot_P-littoralis_Contig227.44.1,prot_P-littoralis_Contig293.2.1,prot_P-littoralis_Contig433.8.1,prot_P-littoralis_Contig63.96.5	prot_S-polyschides_M_contig12762.2507.1,prot_S-polyschides_M_contig3879.12085.1,prot_S-polyschides_M_contig4164.12644.1,prot_S-polyschides_M_contig48971.13846.1,prot_S-polyschides_M_contig58951.15253.1,prot_S-polyschides_M_contig77195.17422.1,prot_S-polyschides_M_contig9460.19257.1	prot_S-promiscuus_M_contig2.4883.1,prot_S-promiscuus_M_contig24.7155.1	SJ06514,SJ13370,SJ17334	prot_S-latissima_F_contig20.5985.1,prot_S-latissima_F_contig890.16742.1,prot_S-latissima_F_contig890.16744.1,prot_S-latissima_F_contig948.17208.1	prot_S-rigidula_F_contig15568.1.1,prot_S-rigidula_F_contig19684.1.1,prot_S-rigidula_F_contig19684.2.1,prot_S-rigidula_F_contig20463.1.1,prot_S-rigidula_F_contig22290.1.1,prot_S-rigidula_F_contig22447.1.1,prot_S-rigidula_F_contig23885.1.1,prot_S-rigidula_F_contig23890.1.1,prot_S-rigidula_F_contig24384.1.1,prot_S-rigidula_F_contig26682.1.1,prot_S-rigidula_F_contig3067.1.1,prot_S-rigidula_F_contig31…
OG0000139	FALSE	NA	Ec-01_002830.1	prot_M-pyrifera_M_contig25.8931.1,prot_M-pyrifera_M_contig29366.9821.1,prot_M-pyrifera_M_contig51438.13475.1	prot_M-clavaeformis_F_contig2996.9748.1	NA	prot_S-polyschides_M_contig36401.11569.1,prot_S-polyschides_M_contig5408.14561.1	NA	SJ00065,SJ16628	prot_S-latissima_F_contig17.4564.1,prot_S-latissima_F_contig714.15009.1,prot_S-latissima_F_contig88.16652.1	prot_S-rigidula_F_contig10836.2.1,prot_S-rigidula_F_contig11687.1.1,prot_S-rigidula_F_contig11689.1.1,prot_S-rigidula_F_contig12564.2.1,prot_S-rigidula_F_contig12854.4.1,prot_S-rigidula_F_contig15184.1.1,prot_S-rigidula_F_contig17030.1.1,prot_S-rigidula_F_contig1707.8.1,prot_S-rigidula_F_contig17763.4.1,prot_S-rigidula_F_contig17803.1.1,prot_S-rigidula_F_contig17838.1.1,prot_S-rigidula_F_contig17…
OG0000140	FALSE	NA	Ec-14_004000.1,Ec-15_004960.1,Ec-22_002460.1,Ec-26_006690.1,Ec-27_003700.1	prot_M-pyrifera_M_contig59772.14891.1,prot_M-pyrifera_M_contig825.19281.1,prot_M-pyrifera_M_contig825.19282.1,prot_M-pyrifera_M_contig86335.20111.1	prot_M-clavaeformis_F_contig4931.14460.1	prot_P-littoralis_Contig115.55.1,prot_P-littoralis_Contig162.40.2,prot_P-littoralis_Contig18.146.1,prot_P-littoralis_Contig189.94.2,prot_P-littoralis_Contig212.27.2,prot_P-littoralis_Contig91.169.1,prot_P-littoralis_Contig91.170.2	prot_S-polyschides_M_contig10553.494.1,prot_S-polyschides_M_contig10553.495.1,prot_S-polyschides_M_contig12100.1987.1,prot_S-polyschides_M_contig13771.3245.1,prot_S-polyschides_M_contig2725.9255.1,prot_S-polyschides_M_contig32058.10539.1,prot_S-polyschides_M_contig38854.12097.1,prot_S-polyschides_M_contig3959.12235.1,prot_S-polyschides_M_contig39970.12330.1,prot_S-polyschides_M_contig4105.12535.1…	prot_S-promiscuus_M_contig67.16921.1,prot_S-promiscuus_M_contig67.16922.1	SJ02142,SJ05907,SJ10409,SJ13998,SJ17764	prot_S-latissima_F_contig1144.1189.1,prot_S-latissima_F_contig1925.5607.1,prot_S-latissima_F_contig2263.6994.1,prot_S-latissima_F_contig2722.8493.1	NA
OG0000141	FALSE	prot_D-dichotoma_M_contig1734.4953.1,prot_D-dichotoma_M_contig1785.5193.1,prot_D-dichotoma_M_contig2670.9209.1,prot_D-dichotoma_M_contig2879.9932.1,prot_D-dichotoma_M_contig3653.12270.1,prot_D-dichotoma_M_contig510.15507.1	Ec-00_003910.1	prot_M-pyrifera_M_contig21576.8170.1	NA	prot_P-littoralis_Contig1023.9.1,prot_P-littoralis_Contig1080.3.1,prot_P-littoralis_Contig1086.3.1,prot_P-littoralis_Contig1096.20.1,prot_P-littoralis_Contig1129.2.2,prot_P-littoralis_Contig1183.7.1,prot_P-littoralis_Contig1209.17.1,prot_P-littoralis_Contig1301.10.1,prot_P-littoralis_Contig147.79.2,prot_P-littoralis_Contig183.5.1,prot_P-littoralis_Contig215.4.1,prot_P-littoralis_Contig23.147.2,pr…	prot_S-polyschides_M_contig18117.5707.1,prot_S-polyschides_M_contig20863.6873.1,prot_S-polyschides_M_contig400.12335.1,prot_S-polyschides_M_contig68885.16510.1,prot_S-polyschides_M_contig71773.16848.1	prot_S-promiscuus_M_contig101.1306.1,prot_S-promiscuus_M_contig2.4778.1	SJ15019	prot_S-latissima_F_contig2082.6292.1	NA
OG0000142	FALSE	prot_D-dichotoma_M_contig2330.7907.1,prot_D-dichotoma_M_contig3266.11229.1	Ec-00_010800.1,Ec-08_000040.1,Ec-09_003950.1,Ec-12_000360.1,Ec-12_000410.1,Ec-20_002860.1,Ec-20_004700.1	prot_M-pyrifera_M_contig27869.9524.1,prot_M-pyrifera_M_contig8014.18784.1	prot_M-clavaeformis_F_contig123.1982.1,prot_M-clavaeformis_F_contig1383.2978.1,prot_M-clavaeformis_F_contig1759.5168.1,prot_M-clavaeformis_F_contig1759.5170.1,prot_M-clavaeformis_F_contig1944.5976.1,prot_M-clavaeformis_F_contig2358.7631.1,prot_M-clavaeformis_F_contig3668.11612.1,prot_M-clavaeformis_F_contig50.14602.1,prot_M-clavaeformis_F_contig50.14603.1,prot_M-clavaeformis_F_contig513.14882.1,p…	prot_P-littoralis_Contig130.77.2,prot_P-littoralis_Contig375.42.2,prot_P-littoralis_Contig375.46.1,prot_P-littoralis_Contig382.19.4,prot_P-littoralis_Contig401.77.2,prot_P-littoralis_Contig446.13.1	prot_S-polyschides_M_contig12037.1936.1,prot_S-polyschides_M_contig1680.5044.1,prot_S-polyschides_M_contig444.13113.1	prot_S-promiscuus_M_contig22.6583.1,prot_S-promiscuus_M_contig34.10704.1,prot_S-promiscuus_M_contig34.10705.1,prot_S-promiscuus_M_contig34.10706.1,prot_S-promiscuus_M_contig38.11553.1,prot_S-promiscuus_M_contig38.11554.1,prot_S-promiscuus_M_contig41.12913.1,prot_S-promiscuus_M_contig45.13582.1,prot_S-promiscuus_M_contig45.13603.1,prot_S-promiscuus_M_contig8.18355.1	SJ08627,SJ15734,SJ21203,SJ21223	prot_S-latissima_F_contig145.3287.1,prot_S-latissima_F_contig518.12865.1,prot_S-latissima_F_contig807.15926.1	prot_S-rigidula_F_contig13895.1.1,prot_S-rigidula_F_contig25383.1.2,prot_S-rigidula_F_contig586.5.1,prot_S-rigidula_F_contig8432.1.2
OG0000143	FALSE	NA	Ec-10_005930.1,Ec-13_000105.1	prot_M-pyrifera_M_contig75417.17797.1,prot_M-pyrifera_M_contig93682.21641.1	prot_M-clavaeformis_F_contig8325.19588.1	prot_P-littoralis_Contig1123.23.1,prot_P-littoralis_Contig115.7.4,prot_P-littoralis_Contig118.5.1,prot_P-littoralis_Contig1226.2.1,prot_P-littoralis_Contig131.133.2,prot_P-littoralis_Contig131.135.1,prot_P-littoralis_Contig1349.13.2,prot_P-littoralis_Contig137.2.1,prot_P-littoralis_Contig150.64.1,prot_P-littoralis_Contig1603.2.2,prot_P-littoralis_Contig200.94.2,prot_P-littoralis_Contig225.26.1,pr…	prot_S-polyschides_M_contig2142.7122.1,prot_S-polyschides_M_contig23957.8165.1,prot_S-polyschides_M_contig29066.9749.1,prot_S-polyschides_M_contig344.11153.1,prot_S-polyschides_M_contig4327.12928.1,prot_S-polyschides_M_contig91870.18990.1	NA	SJ01773,SJ04861,SJ08571,SJ08765,SJ08768,SJ11129,SJ13090,SJ13997	NA	NA
OG0000144	FALSE	NA	Ec-02_001910.1,Ec-06_002670.1,Ec-13_004480.1,Ec-13_004490.1,Ec-13_004500.1,Ec-13_004610.1,Ec-13_004620.1,Ec-13_004810.1,Ec-18_001430.1,Ec-18_001440.1,Ec-18_001450.1,Ec-18_001470.1,Ec-18_001580.1,Ec-19_003770.1,Ec-25_002150.1	NA	prot_M-clavaeformis_F_contig1518.3836.1,prot_M-clavaeformis_F_contig1861.5640.1,prot_M-clavaeformis_F_contig1889.5745.1,prot_M-clavaeformis_F_contig2148.6870.1,prot_M-clavaeformis_F_contig2195.7033.1,prot_M-clavaeformis_F_contig2626.8598.1,prot_M-clavaeformis_F_contig286.9364.1,prot_M-clavaeformis_F_contig2909.9511.1,prot_M-clavaeformis_F_contig3151.10248.1,prot_M-clavaeformis_F_contig3306.10671.…	prot_P-littoralis_Contig13.12.4,prot_P-littoralis_Contig17.228.20,prot_P-littoralis_Contig359.44.1,prot_P-littoralis_Contig424.41.1	prot_S-polyschides_M_contig116880.1589.1,prot_S-polyschides_M_contig120018.1905.1,prot_S-polyschides_M_contig130176.2711.1,prot_S-polyschides_M_contig1714.5216.1,prot_S-polyschides_M_contig95757.19366.1	prot_S-promiscuus_M_contig99.19216.1	NA	prot_S-latissima_F_contig73.15165.1	prot_S-rigidula_F_contig5731.1.1
OG0000145	FALSE	prot_D-dichotoma_M_contig1015.220.1,prot_D-dichotoma_M_contig3103.10755.1	NA	NA	prot_M-clavaeformis_F_contig5234.15066.1	prot_P-littoralis_Contig1036.7.1,prot_P-littoralis_Contig1101.20.1,prot_P-littoralis_Contig1101.9.1,prot_P-littoralis_Contig116.12.1,prot_P-littoralis_Contig1164.15.1,prot_P-littoralis_Contig1199.1.1,prot_P-littoralis_Contig122.94.1,prot_P-littoralis_Contig156.16.1,prot_P-littoralis_Contig171.41.1,prot_P-littoralis_Contig175.91.1,prot_P-littoralis_Contig186.84.1,prot_P-littoralis_Contig2.247.1,pr…	prot_S-polyschides_M_contig4051.12439.1,prot_S-polyschides_M_contig88215.18617.1,prot_S-polyschides_M_contig98775.19638.1	prot_S-promiscuus_M_contig34.10769.1	SJ11346,SJ17682	prot_S-latissima_F_contig1302.2298.1	prot_S-rigidula_F_contig10217.5.1,prot_S-rigidula_F_contig26859.1.1
OG0000146	FALSE	prot_D-dichotoma_M_contig108.685.1,prot_D-dichotoma_M_contig108.686.1,prot_D-dichotoma_M_contig1124.1057.1,prot_D-dichotoma_M_contig2243.7518.1,prot_D-dichotoma_M_contig2739.9451.1	Ec-06_006950.1,Ec-06_007280.1,Ec-06_007290.1,Ec-06_007360.1,Ec-17_002390.1,Ec-18_000100.1,Ec-21_005470.1,Ec-21_005480.1,Ec-21_005500.1	prot_M-pyrifera_M_contig628.15425.1	prot_M-clavaeformis_F_contig110.975.1,prot_M-clavaeformis_F_contig11885.1651.1,prot_M-clavaeformis_F_contig1447.3375.1,prot_M-clavaeformis_F_contig4193.12907.1,prot_M-clavaeformis_F_contig6638.17340.1,prot_M-clavaeformis_F_contig7348.18399.1,prot_M-clavaeformis_F_contig845.19713.1	prot_P-littoralis_Contig640.27.18,prot_P-littoralis_Contig686.10.2,prot_P-littoralis_Contig686.25.2,prot_P-littoralis_Contig88.3.1	prot_S-polyschides_M_contig14354.3643.1,prot_S-polyschides_M_contig15583.4336.1,prot_S-polyschides_M_contig3780.11861.1,prot_S-polyschides_M_contig4141.12602.1,prot_S-polyschides_M_contig4382.13003.1	prot_S-promiscuus_M_contig3.9056.1,prot_S-promiscuus_M_contig3.9057.1,prot_S-promiscuus_M_contig3.9090.1,prot_S-promiscuus_M_contig30.9736.1	SJ03034,SJ06570,SJ07893,SJ11868,SJ11877,SJ18203,SJ18204	prot_S-latissima_F_contig1539.3767.1,prot_S-latissima_F_contig1539.3768.1,prot_S-latissima_F_contig47.12190.1,prot_S-latissima_F_contig47.12191.1,prot_S-latissima_F_contig685.14672.1,prot_S-latissima_F_contig93.17074.1,prot_S-latissima_F_contig931.17081.1	prot_S-rigidula_F_contig19077.1.3,prot_S-rigidula_F_contig991.1.1
OG0000147	FALSE	prot_D-dichotoma_M_contig102.260.1,prot_D-dichotoma_M_contig1048.475.1,prot_D-dichotoma_M_contig1133.1127.1,prot_D-dichotoma_M_contig1179.1443.1,prot_D-dichotoma_M_contig1208.1682.1,prot_D-dichotoma_M_contig1291.2224.1,prot_D-dichotoma_M_contig155.3867.1,prot_D-dichotoma_M_contig2491.8554.1,prot_D-dichotoma_M_contig300.10428.1,prot_D-dichotoma_M_contig3135.10842.1,prot_D-dichotoma_M_contig3399.11…	NA	prot_M-pyrifera_M_contig3489.10848.1,prot_M-pyrifera_M_contig5969.14879.1	NA	prot_P-littoralis_Contig1132.10.1,prot_P-littoralis_Contig1138.19.1,prot_P-littoralis_Contig13.11.1,prot_P-littoralis_Contig1317.8.1,prot_P-littoralis_Contig14.215.1,prot_P-littoralis_Contig1576.1.1,prot_P-littoralis_Contig158.102.1,prot_P-littoralis_Contig195.33.1,prot_P-littoralis_Contig216.16.1,prot_P-littoralis_Contig254.85.1,prot_P-littoralis_Contig339.68.1,prot_P-littoralis_Contig37.114.1,p…	prot_S-polyschides_M_contig18688.5964.1,prot_S-polyschides_M_contig872.18470.1	NA	SJ06860	NA	NA
OG0000148	FALSE	prot_D-dichotoma_M_contig1108.937.1,prot_D-dichotoma_M_contig1142.1187.1,prot_D-dichotoma_M_contig1217.1751.1,prot_D-dichotoma_M_contig1235.1867.1,prot_D-dichotoma_M_contig129.2207.1,prot_D-dichotoma_M_contig135.2631.1,prot_D-dichotoma_M_contig1484.3476.1,prot_D-dichotoma_M_contig1948.6006.1,prot_D-dichotoma_M_contig2200.7348.1,prot_D-dichotoma_M_contig2288.7708.1,prot_D-dichotoma_M_contig2295.77…	NA	NA	NA	prot_P-littoralis_Contig1029.7.1,prot_P-littoralis_Contig1109.2.1,prot_P-littoralis_Contig16.172.3,prot_P-littoralis_Contig24.164.1,prot_P-littoralis_Contig349.3.1,prot_P-littoralis_Contig350.35.1,prot_P-littoralis_Contig474.11.1,prot_P-littoralis_Contig502.31.1,prot_P-littoralis_Contig502.32.1,prot_P-littoralis_Contig560.47.1,prot_P-littoralis_Contig601.31.1,prot_P-littoralis_Contig62.111.1,prot…	prot_S-polyschides_M_contig16196.4713.1	NA	SJ11246	prot_S-latissima_F_contig2170.6630.1,prot_S-latissima_F_contig813.15996.1	NA
OG0000149	FALSE	prot_D-dichotoma_M_contig1304.2362.1,prot_D-dichotoma_M_contig1313.2434.1,prot_D-dichotoma_M_contig1313.2435.1,prot_D-dichotoma_M_contig1725.4915.1,prot_D-dichotoma_M_contig178.5164.1,prot_D-dichotoma_M_contig178.5165.1,prot_D-dichotoma_M_contig178.5166.1,prot_D-dichotoma_M_contig330.11360.1,prot_D-dichotoma_M_contig330.11364.1,prot_D-dichotoma_M_contig4203.13669.1	Ec-05_003280.1,Ec-05_003440.1,Ec-05_003530.1,Ec-05_003540.1,Ec-05_005670.1,Ec-07_000660.1,Ec-16_001610.1,Ec-17_004240.1,Ec-17_004250.1	NA	prot_M-clavaeformis_F_contig1156.1433.1,prot_M-clavaeformis_F_contig2510.8197.1,prot_M-clavaeformis_F_contig2510.8198.1,prot_M-clavaeformis_F_contig2510.8199.1,prot_M-clavaeformis_F_contig2803.9199.1,prot_M-clavaeformis_F_contig286.9362.1,prot_M-clavaeformis_F_contig2957.9645.1,prot_M-clavaeformis_F_contig4740.14061.1,prot_M-clavaeformis_F_contig5281.15156.1,prot_M-clavaeformis_F_contig561.15709.…	prot_P-littoralis_Contig14.251.1,prot_P-littoralis_Contig210.11.1,prot_P-littoralis_Contig338.51.1,prot_P-littoralis_Contig393.52.1	prot_S-polyschides_M_contig129590.2672.1	prot_S-promiscuus_M_contig1.458.1,prot_S-promiscuus_M_contig12.1891.1,prot_S-promiscuus_M_contig12.1892.1,prot_S-promiscuus_M_contig12.1894.1,prot_S-promiscuus_M_contig20.5933.1,prot_S-promiscuus_M_contig20.5953.1,prot_S-promiscuus_M_contig20.5955.1,prot_S-promiscuus_M_contig6.16478.1	NA	NA	prot_S-rigidula_F_contig1144.1.1,prot_S-rigidula_F_contig11766.2.1,prot_S-rigidula_F_contig14883.1.1,prot_S-rigidula_F_contig22216.1.1
OG0000150	FALSE	prot_D-dichotoma_M_contig1004.127.1,prot_D-dichotoma_M_contig330.11361.1,prot_D-dichotoma_M_contig3845.12742.1,prot_D-dichotoma_M_contig5610.16359.1,prot_D-dichotoma_M_contig627.17164.1,prot_D-dichotoma_M_contig668.17595.1,prot_D-dichotoma_M_contig823.19050.1,prot_D-dichotoma_M_contig85.19284.1,prot_D-dichotoma_M_contig877.19530.1	NA	NA	prot_M-clavaeformis_F_contig11237.1178.1,prot_M-clavaeformis_F_contig11296.1219.1,prot_M-clavaeformis_F_contig15994.4307.1,prot_M-clavaeformis_F_contig9993.21280.1	prot_P-littoralis_Contig1051.8.1,prot_P-littoralis_Contig1199.6.1,prot_P-littoralis_Contig135.118.1,prot_P-littoralis_Contig1383.1.1,prot_P-littoralis_Contig237.61.1,prot_P-littoralis_Contig348.58.1,prot_P-littoralis_Contig484.3.1,prot_P-littoralis_Contig604.43.1,prot_P-littoralis_Contig852.23.1	prot_S-polyschides_M_contig873.18483.1,prot_S-polyschides_M_contig9481.19284.1	prot_S-promiscuus_M_contig27.7837.1,prot_S-promiscuus_M_contig34.10777.1,prot_S-promiscuus_M_contig75.17749.1	SJ01005,SJ01077,SJ02583,SJ04471,SJ04569,SJ05386,SJ05648,SJ05654,SJ05820,SJ06539,SJ06674,SJ06737,SJ07657,SJ09482,SJ13473,SJ13596,SJ16724,SJ17557,SJ20868,SJ21272	NA	prot_S-rigidula_F_contig10378.1.1,prot_S-rigidula_F_contig21411.3.1,prot_S-rigidula_F_contig8517.1.1
OG0000151	FALSE	prot_D-dichotoma_M_contig1781.5182.1,prot_D-dichotoma_M_contig1911.5840.1,prot_D-dichotoma_M_contig548.16133.1,prot_D-dichotoma_M_contig596.16818.1	Ec-00_004740.1,Ec-07_007450.1,Ec-08_000120.1,Ec-09_000700.1,Ec-09_000710.1,Ec-12_009010.1,Ec-14_004010.1,Ec-14_005250.1,Ec-19_000220.1	prot_M-pyrifera_M_contig8199.19184.1	prot_M-clavaeformis_F_contig1722.4993.1,prot_M-clavaeformis_F_contig1745.5109.1,prot_M-clavaeformis_F_contig1924.5896.1,prot_M-clavaeformis_F_contig2105.6711.1,prot_M-clavaeformis_F_contig2435.7929.1,prot_M-clavaeformis_F_contig2758.9041.1,prot_M-clavaeformis_F_contig3148.10231.1,prot_M-clavaeformis_F_contig878.20048.1	prot_P-littoralis_Contig62.38.57	prot_S-polyschides_M_contig11823.1697.1,prot_S-polyschides_M_contig1313.2791.1,prot_S-polyschides_M_contig38078.11927.1,prot_S-polyschides_M_contig4.12334.1,prot_S-polyschides_M_contig8213.17949.1,prot_S-polyschides_M_contig8653.18396.1	prot_S-promiscuus_M_contig1.581.1,prot_S-promiscuus_M_contig1.582.1,prot_S-promiscuus_M_contig11.1400.1,prot_S-promiscuus_M_contig14.3103.1,prot_S-promiscuus_M_contig28.8165.1,prot_S-promiscuus_M_contig37.11415.1,prot_S-promiscuus_M_contig4.12166.1,prot_S-promiscuus_M_contig4.12434.1,prot_S-promiscuus_M_contig47.13916.1,prot_S-promiscuus_M_contig70.17601.1,prot_S-promiscuus_M_contig9.19131.1,prot…	SJ00925,SJ06625,SJ07006,SJ07844	prot_S-latissima_F_contig1184.1448.1,prot_S-latissima_F_contig2042.6190.1,prot_S-latissima_F_contig464.12113.1	prot_S-rigidula_F_contig4989.4.1,prot_S-rigidula_F_contig8989.1.1
OG0000152	FALSE	NA	NA	prot_M-pyrifera_M_contig37210.11260.1	prot_M-clavaeformis_F_contig3894.12193.1,prot_M-clavaeformis_F_contig7233.18244.1	prot_P-littoralis_Contig1022.2.1	NA	prot_S-promiscuus_M_contig10.1292.1,prot_S-promiscuus_M_contig16.3585.1,prot_S-promiscuus_M_contig26.7493.1,prot_S-promiscuus_M_contig34.10665.1,prot_S-promiscuus_M_contig4.12711.1	SJ00603,SJ01246,SJ01466,SJ01519,SJ01554,SJ01719,SJ02220,SJ02282,SJ02479,SJ02627,SJ02905,SJ03331,SJ03834,SJ05046,SJ05319,SJ05437,SJ06654,SJ06669,SJ06855,SJ07351,SJ07411,SJ08494,SJ08524,SJ08569,SJ09798,SJ10545,SJ11665,SJ12753,SJ12928,SJ14082,SJ14325,SJ14721,SJ15232,SJ15539,SJ17187,SJ17980,SJ18658,SJ18769,SJ19945,SJ22084	prot_S-latissima_F_contig349.10257.1	NA
OG0000153	FALSE	NA	Ec-03_001020.1,Ec-05_005170.1,Ec-08_005430.1,Ec-15_003200.1,Ec-15_003210.1,Ec-15_003550.1,Ec-15_004030.1,Ec-15_004040.1,Ec-20_001640.1	NA	prot_M-clavaeformis_F_contig1138.1288.1,prot_M-clavaeformis_F_contig1197.1727.1,prot_M-clavaeformis_F_contig1576.4181.1,prot_M-clavaeformis_F_contig1684.4777.1,prot_M-clavaeformis_F_contig177.5214.1,prot_M-clavaeformis_F_contig177.5215.1,prot_M-clavaeformis_F_contig177.5216.1,prot_M-clavaeformis_F_contig177.5217.1,prot_M-clavaeformis_F_contig1942.5968.1,prot_M-clavaeformis_F_contig2061.6520.1,pro…	prot_P-littoralis_Contig345.26.1,prot_P-littoralis_Contig397.2.2	prot_S-polyschides_M_contig2440.8309.1,prot_S-polyschides_M_contig9356.19134.1	prot_S-promiscuus_M_contig11.1372.1,prot_S-promiscuus_M_contig11.1466.1,prot_S-promiscuus_M_contig11.1467.1,prot_S-promiscuus_M_contig11.1468.1,prot_S-promiscuus_M_contig11.1585.1,prot_S-promiscuus_M_contig15.3176.1,prot_S-promiscuus_M_contig31.10072.1,prot_S-promiscuus_M_contig38.11646.1	SJ01247	prot_S-latissima_F_contig5.12571.1	NA
OG0000154	FALSE	prot_D-dichotoma_M_contig933.20072.1	Ec-07_001930.1,Ec-22_001840.1,Ec-22_001890.1,Ec-22_001900.1	prot_M-pyrifera_M_contig12639.5319.1,prot_M-pyrifera_M_contig2243.8350.1,prot_M-pyrifera_M_contig2243.8351.1,prot_M-pyrifera_M_contig3062.10076.1,prot_M-pyrifera_M_contig381.11392.1,prot_M-pyrifera_M_contig69478.16653.1,prot_M-pyrifera_M_contig87016.20230.1,prot_M-pyrifera_M_contig9253.21399.1	prot_M-clavaeformis_F_contig15097.3788.1,prot_M-clavaeformis_F_contig2028.6385.1	prot_P-littoralis_Contig1053.5.1,prot_P-littoralis_Contig126.40.2	prot_S-polyschides_M_contig9376.19148.1	prot_S-promiscuus_M_contig37.11491.1,prot_S-promiscuus_M_contig37.11496.1,prot_S-promiscuus_M_contig37.11497.1,prot_S-promiscuus_M_contig53.15425.1	SJ01810,SJ01811,SJ01812,SJ02267,SJ05540,SJ05541,SJ07786,SJ07787,SJ07788,SJ14863,SJ14864,SJ18199,SJ21249	prot_S-latissima_F_contig1698.4543.1,prot_S-latissima_F_contig1794.5010.1,prot_S-latissima_F_contig3060.9419.1,prot_S-latissima_F_contig3060.9420.1,prot_S-latissima_F_contig348.10244.1,prot_S-latissima_F_contig408.11257.1,prot_S-latissima_F_contig408.11258.1,prot_S-latissima_F_contig408.11259.1,prot_S-latissima_F_contig408.11261.1,prot_S-latissima_F_contig47.12193.1,prot_S-latissima_F_contig47.12…	prot_S-rigidula_F_contig17422.1.1,prot_S-rigidula_F_contig2523.2.1
OG0000155	FALSE	prot_D-dichotoma_M_contig1597.4139.1,prot_D-dichotoma_M_contig229.7721.1,prot_D-dichotoma_M_contig2492.8556.1,prot_D-dichotoma_M_contig4329.13937.1,prot_D-dichotoma_M_contig720.18103.1,prot_D-dichotoma_M_contig743.18277.1,prot_D-dichotoma_M_contig809.18933.1	Ec-07_000580.1,Ec-07_000630.1,Ec-07_000650.1,Ec-07_000670.1,Ec-07_002110.1,Ec-26_004330.1	prot_M-pyrifera_M_contig108.1700.1,prot_M-pyrifera_M_contig32789.10476.1,prot_M-pyrifera_M_contig4367.12244.1	prot_M-clavaeformis_F_contig14285.3269.1,prot_M-clavaeformis_F_contig1628.4474.1,prot_M-clavaeformis_F_contig2092.6636.1,prot_M-clavaeformis_F_contig2296.7394.1,prot_M-clavaeformis_F_contig2540.8300.1,prot_M-clavaeformis_F_contig3358.10804.1,prot_M-clavaeformis_F_contig4399.13340.1,prot_M-clavaeformis_F_contig769.18842.1,prot_M-clavaeformis_F_contig8040.19283.1	prot_P-littoralis_Contig33.161.1,prot_P-littoralis_Contig34.16.2,prot_P-littoralis_Contig442.38.2,prot_P-littoralis_Contig499.45.6,prot_P-littoralis_Contig660.4.1,prot_P-littoralis_Contig667.29.1,prot_P-littoralis_Contig667.4.2,prot_P-littoralis_Contig782.1.1	prot_S-polyschides_M_contig10715.640.1,prot_S-polyschides_M_contig42913.12862.1	prot_S-promiscuus_M_contig10.1053.1,prot_S-promiscuus_M_contig10.1054.1,prot_S-promiscuus_M_contig14.2854.1,prot_S-promiscuus_M_contig24.7199.1,prot_S-promiscuus_M_contig24.7200.1,prot_S-promiscuus_M_contig51.15191.1	SJ01052,SJ11522,SJ14184,SJ14192	prot_S-latissima_F_contig1119.966.1,prot_S-latissima_F_contig294.9065.1,prot_S-latissima_F_contig875.16630.1,prot_S-latissima_F_contig875.16631.1	NA
OG0000156	FALSE	prot_D-dichotoma_M_contig140.2986.1,prot_D-dichotoma_M_contig1628.4390.1	Ec-01_002800.1,Ec-03_004260.1,Ec-20_004210.1,Ec-20_004370.1,Ec-20_004380.1,Ec-20_004410.1,Ec-20_004420.1,Ec-20_004450.1,Ec-27_001330.1,Ec-27_005590.1	prot_M-pyrifera_M_contig1021.453.1,prot_M-pyrifera_M_contig12998.5814.1,prot_M-pyrifera_M_contig635.15563.1	prot_M-clavaeformis_F_contig16.4312.1,prot_M-clavaeformis_F_contig2283.7351.1,prot_M-clavaeformis_F_contig2656.8708.1,prot_M-clavaeformis_F_contig702.17955.1,prot_M-clavaeformis_F_contig890.20192.1,prot_M-clavaeformis_F_contig890.20193.1	prot_P-littoralis_Contig130.1.4,prot_P-littoralis_Contig130.10.3,prot_P-littoralis_Contig141.67.1,prot_P-littoralis_Contig230.6.4,prot_P-littoralis_Contig236.68.1,prot_P-littoralis_Contig849.8.1,prot_P-littoralis_Contig914.27.5	prot_S-polyschides_M_contig2950.9875.1,prot_S-polyschides_M_contig4703.13571.1	prot_S-promiscuus_M_contig10.1194.1,prot_S-promiscuus_M_contig3.8985.1,prot_S-promiscuus_M_contig45.13644.1,prot_S-promiscuus_M_contig45.13645.1,prot_S-promiscuus_M_contig45.13646.1,prot_S-promiscuus_M_contig45.13647.1	SJ08193,SJ10707,SJ10714,SJ19049,SJ19051,SJ20362	prot_S-latissima_F_contig2002.6012.1,prot_S-latissima_F_contig2790.8671.1,prot_S-latissima_F_contig387.10887.1,prot_S-latissima_F_contig584.13601.1,prot_S-latissima_F_contig584.13602.1,prot_S-latissima_F_contig690.14711.1	prot_S-rigidula_F_contig1111.1.1
OG0000157	FALSE	prot_D-dichotoma_M_contig1013.209.1,prot_D-dichotoma_M_contig1613.4287.1,prot_D-dichotoma_M_contig1613.4290.1	Ec-00_008360.1,Ec-00_008370.1,Ec-00_008380.1,Ec-00_008870.1,Ec-00_008890.1,Ec-13_002360.1,Ec-13_002370.1	prot_M-pyrifera_M_contig14494.6276.1,prot_M-pyrifera_M_contig1842.7409.1,prot_M-pyrifera_M_contig21232.8082.1,prot_M-pyrifera_M_contig9123.21143.1	prot_M-clavaeformis_F_contig39.12204.1,prot_M-clavaeformis_F_contig4092.12671.1,prot_M-clavaeformis_F_contig4092.12672.1	prot_P-littoralis_Contig583.3.3,prot_P-littoralis_Contig583.5.1,prot_P-littoralis_Contig583.7.1	prot_S-polyschides_M_contig124263.2258.1,prot_S-polyschides_M_contig1742.5352.1,prot_S-polyschides_M_contig1869.5965.1,prot_S-polyschides_M_contig1908.6116.1,prot_S-polyschides_M_contig23538.7998.1,prot_S-polyschides_M_contig4389.13011.1,prot_S-polyschides_M_contig9094.18910.1	prot_S-promiscuus_M_contig1.228.1	SJ02437,SJ02439,SJ02440,SJ02442,SJ16876,SJ16877,SJ16878,SJ16879,SJ16880,SJ16882,SJ16883	prot_S-latissima_F_contig2491.7806.1,prot_S-latissima_F_contig350.10280.1,prot_S-latissima_F_contig350.10281.1,prot_S-latissima_F_contig350.10282.1,prot_S-latissima_F_contig350.10283.1,prot_S-latissima_F_contig350.10284.1,prot_S-latissima_F_contig350.10285.1,prot_S-latissima_F_contig654.14324.1,prot_S-latissima_F_contig654.14325.1,prot_S-latissima_F_contig654.14326.1	NA
OG0000158	FALSE	prot_D-dichotoma_M_contig4274.13815.1	NA	prot_M-pyrifera_M_contig1485.6382.1	prot_M-clavaeformis_F_contig1291.2393.1,prot_M-clavaeformis_F_contig1291.2394.1,prot_M-clavaeformis_F_contig1392.3042.1,prot_M-clavaeformis_F_contig1684.4778.1,prot_M-clavaeformis_F_contig1791.5302.1,prot_M-clavaeformis_F_contig2008.6308.1,prot_M-clavaeformis_F_contig228.7338.1,prot_M-clavaeformis_F_contig2338.7546.1,prot_M-clavaeformis_F_contig3653.11573.1,prot_M-clavaeformis_F_contig3796.11947.…	prot_P-littoralis_Contig26.160.1,prot_P-littoralis_Contig26.171.1,prot_P-littoralis_Contig370.16.2,prot_P-littoralis_Contig510.46.1,prot_P-littoralis_Contig707.29.1	prot_S-polyschides_M_contig14963.3965.1	prot_S-promiscuus_M_contig12.2024.1,prot_S-promiscuus_M_contig12.2075.1	SJ03804	prot_S-latissima_F_contig1067.558.1,prot_S-latissima_F_contig1336.2511.1,prot_S-latissima_F_contig158.3985.1,prot_S-latissima_F_contig21.6366.1,prot_S-latissima_F_contig224.6896.1,prot_S-latissima_F_contig224.6897.1,prot_S-latissima_F_contig2821.8806.1,prot_S-latissima_F_contig477.12276.1,prot_S-latissima_F_contig477.12277.1,prot_S-latissima_F_contig622.14031.1,prot_S-latissima_F_contig8.15873.1,…	prot_S-rigidula_F_contig2691.1.1
OG0000159	FALSE	NA	Ec-08_002960.1,Ec-11_005360.1	prot_M-pyrifera_M_contig13029.5823.1,prot_M-pyrifera_M_contig40491.11768.1	prot_M-clavaeformis_F_contig2319.7477.1,prot_M-clavaeformis_F_contig2687.8808.1,prot_M-clavaeformis_F_contig329.10616.1,prot_M-clavaeformis_F_contig3386.10890.1,prot_M-clavaeformis_F_contig3883.12167.1,prot_M-clavaeformis_F_contig52.14993.1,prot_M-clavaeformis_F_contig814.19385.1	prot_P-littoralis_Contig342.43.2,prot_P-littoralis_Contig558.1.3,prot_P-littoralis_Contig848.16.2	NA	prot_S-promiscuus_M_contig1.216.1,prot_S-promiscuus_M_contig11.1364.1,prot_S-promiscuus_M_contig35.10911.1,prot_S-promiscuus_M_contig35.10912.1,prot_S-promiscuus_M_contig35.10913.1,prot_S-promiscuus_M_contig35.10915.1,prot_S-promiscuus_M_contig35.10922.1,prot_S-promiscuus_M_contig35.10954.1,prot_S-promiscuus_M_contig35.10955.1,prot_S-promiscuus_M_contig35.10963.1,prot_S-promiscuus_M_contig35.1096…	SJ01591,SJ08268,SJ08269,SJ08396,SJ08650,SJ10941,SJ13176,SJ19453,SJ19454,SJ19455	prot_S-latissima_F_contig280.8729.1,prot_S-latissima_F_contig286.8906.1,prot_S-latissima_F_contig33.9936.1,prot_S-latissima_F_contig33.9937.1,prot_S-latissima_F_contig33.9938.1,prot_S-latissima_F_contig79.15791.1,prot_S-latissima_F_contig79.15792.1,prot_S-latissima_F_contig816.16021.1,prot_S-latissima_F_contig816.16022.1	NA
OG0000160	FALSE	NA	Ec-00_000360.1,Ec-00_004200.1,Ec-00_010460.1,Ec-04_006372.1,Ec-27_000620.1	NA	NA	prot_P-littoralis_Contig1195.5.1,prot_P-littoralis_Contig124.15.7,prot_P-littoralis_Contig1351.2.1,prot_P-littoralis_Contig178.71.1,prot_P-littoralis_Contig24.126.1,prot_P-littoralis_Contig328.49.1,prot_P-littoralis_Contig328.51.1,prot_P-littoralis_Contig374.49.1,prot_P-littoralis_Contig444.53.1,prot_P-littoralis_Contig48.90.1,prot_P-littoralis_Contig507.31.1,prot_P-littoralis_Contig524.16.1,prot…	prot_S-polyschides_M_contig116522.1554.1,prot_S-polyschides_M_contig121812.2050.1,prot_S-polyschides_M_contig131678.2812.1,prot_S-polyschides_M_contig38479.12016.1,prot_S-polyschides_M_contig64093.15934.1	prot_S-promiscuus_M_contig73.17666.1,prot_S-promiscuus_M_contig79.17811.1,prot_S-promiscuus_M_contig90.19140.1,prot_S-promiscuus_M_contig90.19141.1,prot_S-promiscuus_M_contig99.19212.1	SJ07467,SJ17975,SJ18786,SJ22122	prot_S-latissima_F_contig1309.2342.1,prot_S-latissima_F_contig389.10899.1	prot_S-rigidula_F_contig10382.1.1,prot_S-rigidula_F_contig10824.1.1,prot_S-rigidula_F_contig1218.13.1,prot_S-rigidula_F_contig5238.3.1
OG0000161	FALSE	prot_D-dichotoma_M_contig1006.139.1,prot_D-dichotoma_M_contig1480.3458.1,prot_D-dichotoma_M_contig1626.4373.1,prot_D-dichotoma_M_contig1657.4547.1,prot_D-dichotoma_M_contig1815.5373.1,prot_D-dichotoma_M_contig1941.5985.1,prot_D-dichotoma_M_contig2129.7008.1,prot_D-dichotoma_M_contig2229.7449.1,prot_D-dichotoma_M_contig2268.7602.1,prot_D-dichotoma_M_contig2378.8091.1,prot_D-dichotoma_M_contig2379.…	Ec-20_001180.1	prot_M-pyrifera_M_contig18444.7413.1	prot_M-clavaeformis_F_contig5843.16094.1,prot_M-clavaeformis_F_contig6897.17683.1	prot_P-littoralis_Contig156.12.8	prot_S-polyschides_M_contig16243.4733.1,prot_S-polyschides_M_contig19906.6468.1	prot_S-promiscuus_M_contig8.18262.1	SJ02739,SJ14249,SJ14250	NA	NA
OG0000162	FALSE	prot_D-dichotoma_M_contig123.1825.1,prot_D-dichotoma_M_contig1649.4491.1,prot_D-dichotoma_M_contig247.8476.1,prot_D-dichotoma_M_contig252.8671.1,prot_D-dichotoma_M_contig2738.9449.1,prot_D-dichotoma_M_contig2768.9534.1,prot_D-dichotoma_M_contig3023.10499.1,prot_D-dichotoma_M_contig3561.12025.1,prot_D-dichotoma_M_contig4837.14960.1,prot_D-dichotoma_M_contig5472.16111.1	Ec-10_000570.1,Ec-10_000810.1,Ec-10_004370.1,Ec-10_004500.1,Ec-16_004800.1	NA	prot_M-clavaeformis_F_contig1688.4794.1,prot_M-clavaeformis_F_contig2301.7421.1,prot_M-clavaeformis_F_contig5193.14984.1,prot_M-clavaeformis_F_contig598.16313.1,prot_M-clavaeformis_F_contig7009.17938.1	prot_P-littoralis_Contig1127.12.1,prot_P-littoralis_Contig1127.7.1,prot_P-littoralis_Contig195.2.2,prot_P-littoralis_Contig195.5.1,prot_P-littoralis_Contig195.55.2,prot_P-littoralis_Contig372.38.10,prot_P-littoralis_Contig389.23.1,prot_P-littoralis_Contig437.49.14,prot_P-littoralis_Contig45.18.4,prot_P-littoralis_Contig744.1.2	prot_S-polyschides_M_contig82249.17961.1	prot_S-promiscuus_M_contig12.2121.1,prot_S-promiscuus_M_contig12.2122.1,prot_S-promiscuus_M_contig16.3532.1,prot_S-promiscuus_M_contig16.3537.1,prot_S-promiscuus_M_contig16.3540.1,prot_S-promiscuus_M_contig17.3892.1,prot_S-promiscuus_M_contig41.12973.1	NA	NA	prot_S-rigidula_F_contig11914.1.1,prot_S-rigidula_F_contig14829.1.1,prot_S-rigidula_F_contig14829.2.1,prot_S-rigidula_F_contig3303.1.1,prot_S-rigidula_F_contig3754.1.1,prot_S-rigidula_F_contig6139.2.1,prot_S-rigidula_F_contig817.1.1,prot_S-rigidula_F_contig817.2.1,prot_S-rigidula_F_contig817.3.1,prot_S-rigidula_F_contig9906.1.1
OG0000163	FALSE	prot_D-dichotoma_M_contig1013.197.1,prot_D-dichotoma_M_contig1019.244.1,prot_D-dichotoma_M_contig1083.714.1,prot_D-dichotoma_M_contig1154.1270.1,prot_D-dichotoma_M_contig1215.1739.1,prot_D-dichotoma_M_contig14.2952.1,prot_D-dichotoma_M_contig1502.3611.1,prot_D-dichotoma_M_contig173.4931.1,prot_D-dichotoma_M_contig180.5306.1,prot_D-dichotoma_M_contig1801.5314.1,prot_D-dichotoma_M_contig1862.5569.1…	Ec-08_006560.1,Ec-15_001220.1	prot_M-pyrifera_M_contig48078.12915.1,prot_M-pyrifera_M_contig54815.14047.1	NA	NA	prot_S-polyschides_M_contig1535.4188.1,prot_S-polyschides_M_contig35328.11372.1,prot_S-polyschides_M_contig35411.11390.1,prot_S-polyschides_M_contig68740.16494.1,prot_S-polyschides_M_contig89400.18772.1	NA	SJ00521,SJ05212,SJ21731,SJ22445	prot_S-latissima_F_contig1838.5226.1,prot_S-latissima_F_contig19.5475.1,prot_S-latissima_F_contig924.17013.1	prot_S-rigidula_F_contig16584.2.1,prot_S-rigidula_F_contig6630.3.1,prot_S-rigidula_F_contig7767.4.1
OG0000164	FALSE	prot_D-dichotoma_M_contig1119.1016.1,prot_D-dichotoma_M_contig1668.4602.1,prot_D-dichotoma_M_contig2722.9407.1,prot_D-dichotoma_M_contig2786.9605.1,prot_D-dichotoma_M_contig3739.12494.1,prot_D-dichotoma_M_contig4808.14901.1,prot_D-dichotoma_M_contig517.15617.1,prot_D-dichotoma_M_contig517.15618.1,prot_D-dichotoma_M_contig535.15921.1,prot_D-dichotoma_M_contig535.15923.1,prot_D-dichotoma_M_contig75…	Ec-00_008280.1,Ec-04_000730.1,Ec-04_000780.1,Ec-04_000790.1,Ec-05_001830.1,Ec-05_001900.1,Ec-09_001110.1	prot_M-pyrifera_M_contig3348.10611.1	prot_M-clavaeformis_F_contig131.2524.1,prot_M-clavaeformis_F_contig131.2525.1,prot_M-clavaeformis_F_contig218.6980.1,prot_M-clavaeformis_F_contig218.6981.1,prot_M-clavaeformis_F_contig2315.7469.1,prot_M-clavaeformis_F_contig4496.13545.1,prot_M-clavaeformis_F_contig6404.17007.1,prot_M-clavaeformis_F_contig934.20650.1,prot_M-clavaeformis_F_contig934.20654.1	prot_P-littoralis_Contig1019.6.4,prot_P-littoralis_Contig178.54.2,prot_P-littoralis_Contig178.60.1,prot_P-littoralis_Contig629.15.6,prot_P-littoralis_Contig629.17.1,prot_P-littoralis_Contig674.8.1	prot_S-polyschides_M_contig11217.1105.1,prot_S-polyschides_M_contig12774.2518.1,prot_S-polyschides_M_contig18157.5725.1,prot_S-polyschides_M_contig4409.13064.1	prot_S-promiscuus_M_contig35.10850.1,prot_S-promiscuus_M_contig35.10853.1,prot_S-promiscuus_M_contig35.10854.1,prot_S-promiscuus_M_contig62.16772.1	SJ01143,SJ01153	prot_S-latissima_F_contig1550.3843.1,prot_S-latissima_F_contig303.9343.1	prot_S-rigidula_F_contig23181.1.1,prot_S-rigidula_F_contig84.2.1
OG0000165	FALSE	prot_D-dichotoma_M_contig113.1085.1,prot_D-dichotoma_M_contig1516.3674.1,prot_D-dichotoma_M_contig626.17162.1	Ec-00_006570.1,Ec-00_006590.1,Ec-26_002660.1,Ec-26_002820.1,Ec-26_003200.1,Ec-26_005190.1	prot_M-pyrifera_M_contig10195.423.1,prot_M-pyrifera_M_contig40626.11788.1	prot_M-clavaeformis_F_contig1012.190.1,prot_M-clavaeformis_F_contig1022.279.1,prot_M-clavaeformis_F_contig366.11594.1,prot_M-clavaeformis_F_contig675.17493.1	prot_P-littoralis_Contig41.121.1,prot_P-littoralis_Contig41.151.1,prot_P-littoralis_Contig497.62.2,prot_P-littoralis_Contig93.82.1	prot_S-polyschides_M_contig12525.2322.1,prot_S-polyschides_M_contig13555.3073.1,prot_S-polyschides_M_contig1802.5661.1,prot_S-polyschides_M_contig3199.10515.1,prot_S-polyschides_M_contig7837.17529.1,prot_S-polyschides_M_contig9734.19522.1	prot_S-promiscuus_M_contig14.2684.1,prot_S-promiscuus_M_contig14.2915.1,prot_S-promiscuus_M_contig16.3677.1	SJ01226,SJ05577,SJ05585,SJ05586,SJ05587,SJ14934,SJ16745,SJ17732	prot_S-latissima_F_contig1033.294.1,prot_S-latissima_F_contig1297.2229.1,prot_S-latissima_F_contig140.2968.1,prot_S-latissima_F_contig2198.6737.1,prot_S-latissima_F_contig3140.9587.1,prot_S-latissima_F_contig830.16199.1	prot_S-rigidula_F_contig11815.1.1,prot_S-rigidula_F_contig3465.3.1,prot_S-rigidula_F_contig3527.1.1,prot_S-rigidula_F_contig5102.2.1,prot_S-rigidula_F_contig5189.1.2,prot_S-rigidula_F_contig8036.2.1
OG0000166	FALSE	prot_D-dichotoma_M_contig2810.9721.1	Ec-04_000200.1,Ec-04_000210.1,Ec-04_000215.1,Ec-04_000220.1,Ec-10_002340.1,Ec-10_002350.1,Ec-10_002360.1,Ec-11_000420.1	prot_M-pyrifera_M_contig1004.84.1,prot_M-pyrifera_M_contig3096.10143.1,prot_M-pyrifera_M_contig3574.10982.1	prot_M-clavaeformis_F_contig605.16459.1,prot_M-clavaeformis_F_contig605.16461.1,prot_M-clavaeformis_F_contig95.20812.1	prot_P-littoralis_Contig138.30.10,prot_P-littoralis_Contig318.77.1	prot_S-polyschides_M_contig11360.1262.1,prot_S-polyschides_M_contig12322.2166.1,prot_S-polyschides_M_contig492.13884.1,prot_S-polyschides_M_contig595.15325.1,prot_S-polyschides_M_contig6017.15402.1	prot_S-promiscuus_M_contig12.1920.1,prot_S-promiscuus_M_contig12.1921.1,prot_S-promiscuus_M_contig9.18724.1,prot_S-promiscuus_M_contig9.18730.1,prot_S-promiscuus_M_contig9.18734.1	SJ03000,SJ03004,SJ03005,SJ07432,SJ08322,SJ08712,SJ10458,SJ18372,SJ20013,SJ20015,SJ20019	prot_S-latissima_F_contig1050.446.1,prot_S-latissima_F_contig1398.2920.1,prot_S-latissima_F_contig1511.3607.1,prot_S-latissima_F_contig1511.3608.1,prot_S-latissima_F_contig1779.4935.1,prot_S-latissima_F_contig244.7641.1	prot_S-rigidula_F_contig332.1.1,prot_S-rigidula_F_contig3894.3.1,prot_S-rigidula_F_contig3954.1.1,prot_S-rigidula_F_contig6650.1.1
OG0000167	FALSE	NA	Ec-03_000280.1,Ec-03_000310.1,Ec-03_000320.1,Ec-03_000330.1,Ec-04_001370.1,Ec-04_001380.1,Ec-04_001390.1,Ec-04_001400.1,Ec-08_004740.1,Ec-16_003210.1,Ec-18_003590.1,Ec-24_003130.1,Ec-24_003170.1,Ec-25_001240.1	NA	prot_M-clavaeformis_F_contig1347.2744.1,prot_M-clavaeformis_F_contig1417.3203.1,prot_M-clavaeformis_F_contig1794.5319.1,prot_M-clavaeformis_F_contig1821.5481.1,prot_M-clavaeformis_F_contig1821.5482.1,prot_M-clavaeformis_F_contig2889.9441.1,prot_M-clavaeformis_F_contig65.17122.1,prot_M-clavaeformis_F_contig65.17127.1,prot_M-clavaeformis_F_contig716.18167.1,prot_M-clavaeformis_F_contig88.20078.1	prot_P-littoralis_Contig1084.13.1,prot_P-littoralis_Contig1084.15.1,prot_P-littoralis_Contig29.29.2,prot_P-littoralis_Contig44.12.1,prot_P-littoralis_Contig44.19.3,prot_P-littoralis_Contig70.102.3,prot_P-littoralis_Contig70.93.12,prot_P-littoralis_Contig70.98.3,prot_P-littoralis_Contig70.99.1	prot_S-polyschides_M_contig9070.18885.1	prot_S-promiscuus_M_contig23.6684.1,prot_S-promiscuus_M_contig38.11666.1,prot_S-promiscuus_M_contig47.13938.1,prot_S-promiscuus_M_contig47.13939.1,prot_S-promiscuus_M_contig47.13940.1,prot_S-promiscuus_M_contig47.13943.1,prot_S-promiscuus_M_contig56.15654.1,prot_S-promiscuus_M_contig56.15670.1,prot_S-promiscuus_M_contig56.15672.1,prot_S-promiscuus_M_contig8.17933.1,prot_S-promiscuus_M_contig85.18…	SJ06114	prot_S-latissima_F_contig527.13014.1	prot_S-rigidula_F_contig7066.1.1
OG0000168	FALSE	prot_D-dichotoma_M_contig1898.5735.1,prot_D-dichotoma_M_contig2010.6386.1,prot_D-dichotoma_M_contig3869.12799.1,prot_D-dichotoma_M_contig4223.13716.1,prot_D-dichotoma_M_contig4391.14052.1,prot_D-dichotoma_M_contig4433.14148.1,prot_D-dichotoma_M_contig5683.16445.1	NA	NA	NA	prot_P-littoralis_Contig1567.1.1	prot_S-polyschides_M_contig30573.10161.1,prot_S-polyschides_M_contig41231.12566.1,prot_S-polyschides_M_contig47853.13685.1,prot_S-polyschides_M_contig54586.14624.1,prot_S-polyschides_M_contig59709.15354.1,prot_S-polyschides_M_contig67825.16394.1	prot_S-promiscuus_M_contig19.4625.1	SJ01335,SJ02325,SJ04422,SJ05692,SJ06044,SJ06509,SJ07768,SJ08785,SJ09515,SJ09555,SJ09778,SJ10085,SJ10302,SJ10424,SJ11224,SJ12771,SJ13136,SJ13709,SJ14470,SJ16547,SJ16792,SJ17236,SJ17305,SJ17763,SJ18332,SJ19371,SJ19381,SJ20874,SJ21001	NA	prot_S-rigidula_F_contig4354.2.1,prot_S-rigidula_F_contig6849.3.1,prot_S-rigidula_F_contig8652.3.1
OG0000169	FALSE	prot_D-dichotoma_M_contig3679.12323.1,prot_D-dichotoma_M_contig3679.12324.1,prot_D-dichotoma_M_contig5788.16582.1,prot_D-dichotoma_M_contig5788.16583.1,prot_D-dichotoma_M_contig808.18922.1	Ec-01_010250.1,Ec-20_004290.1	prot_M-pyrifera_M_contig64109.15673.1,prot_M-pyrifera_M_contig79726.18708.1,prot_M-pyrifera_M_contig90777.21042.1,prot_M-pyrifera_M_contig90782.21043.1	prot_M-clavaeformis_F_contig16076.4367.1	prot_P-littoralis_Contig1403.4.1,prot_P-littoralis_Contig2.400.1,prot_P-littoralis_Contig2.415.1,prot_P-littoralis_Contig2.420.1	prot_S-polyschides_M_contig13081.2759.1,prot_S-polyschides_M_contig25985.8851.1,prot_S-polyschides_M_contig34421.11164.1,prot_S-polyschides_M_contig34944.11284.1,prot_S-polyschides_M_contig35241.11350.1,prot_S-polyschides_M_contig4807.13724.1,prot_S-polyschides_M_contig4807.13725.1,prot_S-polyschides_M_contig9464.19263.1	prot_S-promiscuus_M_contig2.5461.1,prot_S-promiscuus_M_contig2.5472.1,prot_S-promiscuus_M_contig2.5473.1,prot_S-promiscuus_M_contig2.5474.1	SJ01785,SJ01786,SJ03415,SJ03416,SJ03421,SJ03422,SJ04864,SJ04865,SJ16161,SJ16162,SJ16164,SJ16165,SJ16167,SJ16168	prot_S-latissima_F_contig1516.3619.1,prot_S-latissima_F_contig1516.3620.1	prot_S-rigidula_F_contig14791.1.1,prot_S-rigidula_F_contig21247.3.1,prot_S-rigidula_F_contig24550.1.1
OG0000170	FALSE	prot_D-dichotoma_M_contig1532.3775.1,prot_D-dichotoma_M_contig1867.5593.1,prot_D-dichotoma_M_contig3979.13053.1,prot_D-dichotoma_M_contig4175.13585.1,prot_D-dichotoma_M_contig510.15494.1,prot_D-dichotoma_M_contig628.17171.1,prot_D-dichotoma_M_contig638.17322.1,prot_D-dichotoma_M_contig98.20454.1,prot_D-dichotoma_M_contig99.20526.1	NA	prot_M-pyrifera_M_contig30398.10024.1,prot_M-pyrifera_M_contig54310.13959.1	prot_M-clavaeformis_F_contig5822.16063.1	prot_P-littoralis_Contig104.6.1,prot_P-littoralis_Contig192.99.1,prot_P-littoralis_Contig329.25.1,prot_P-littoralis_Contig33.66.1,prot_P-littoralis_Contig337.26.1,prot_P-littoralis_Contig436.43.1,prot_P-littoralis_Contig439.42.1,prot_P-littoralis_Contig483.77.1,prot_P-littoralis_Contig49.86.1,prot_P-littoralis_Contig627.24.1,prot_P-littoralis_Contig701.9.1,prot_P-littoralis_Contig726.23.1,prot_P-…	prot_S-polyschides_M_contig11457.1361.1,prot_S-polyschides_M_contig14437.3680.1,prot_S-polyschides_M_contig4164.12645.1,prot_S-polyschides_M_contig52256.14320.1	NA	NA	NA	prot_S-rigidula_F_contig10365.1.1,prot_S-rigidula_F_contig11250.1.1,prot_S-rigidula_F_contig11563.1.1,prot_S-rigidula_F_contig14375.1.1,prot_S-rigidula_F_contig16558.4.1,prot_S-rigidula_F_contig16774.3.1,prot_S-rigidula_F_contig19867.1.1,prot_S-rigidula_F_contig20516.1.1,prot_S-rigidula_F_contig22664.2.1,prot_S-rigidula_F_contig23066.1.1,prot_S-rigidula_F_contig2687.1.1,prot_S-rigidula_F_contig33…
OG0000171	FALSE	prot_D-dichotoma_M_contig1012.195.1,prot_D-dichotoma_M_contig1721.4902.1,prot_D-dichotoma_M_contig1833.5435.1,prot_D-dichotoma_M_contig3014.10462.1,prot_D-dichotoma_M_contig3036.10527.1,prot_D-dichotoma_M_contig3610.12170.1,prot_D-dichotoma_M_contig4368.14019.1	Ec-00_009000.1,Ec-02_001160.1,Ec-02_001180.1,Ec-19_002090.1,Ec-19_002150.1,Ec-19_002160.1	prot_M-pyrifera_M_contig49.13060.1,prot_M-pyrifera_M_contig5.13226.1,prot_M-pyrifera_M_contig53.13738.1	prot_M-clavaeformis_F_contig151.3790.1,prot_M-clavaeformis_F_contig2652.8695.1	prot_P-littoralis_Contig445.5.27,prot_P-littoralis_Contig473.20.18,prot_P-littoralis_Contig496.15.50,prot_P-littoralis_Contig75.60.2	prot_S-polyschides_M_contig34.11017.1	prot_S-promiscuus_M_contig43.13334.1,prot_S-promiscuus_M_contig50.15082.1	SJ01588,SJ01821,SJ02944,SJ08007,SJ10388,SJ13994,SJ14426,SJ14431,SJ16496,SJ16502,SJ20393	prot_S-latissima_F_contig1982.5845.1,prot_S-latissima_F_contig265.8288.1,prot_S-latissima_F_contig265.8289.1,prot_S-latissima_F_contig444.11834.1,prot_S-latissima_F_contig503.12639.1,prot_S-latissima_F_contig503.12641.1,prot_S-latissima_F_contig544.13160.1,prot_S-latissima_F_contig583.13599.1,prot_S-latissima_F_contig75.15350.1	prot_S-rigidula_F_contig1338.1.5,prot_S-rigidula_F_contig4900.2.1
OG0000172	FALSE	prot_D-dichotoma_M_contig1024.299.1,prot_D-dichotoma_M_contig1045.463.1,prot_D-dichotoma_M_contig1203.1649.1,prot_D-dichotoma_M_contig1567.3968.1,prot_D-dichotoma_M_contig18.5273.1,prot_D-dichotoma_M_contig215.7108.1,prot_D-dichotoma_M_contig4285.13831.1,prot_D-dichotoma_M_contig562.16381.1	Ec-00_006460.1,Ec-00_009720.1,Ec-12_006115.1,Ec-17_002040.1	NA	prot_M-clavaeformis_F_contig80.19238.1	prot_P-littoralis_Contig118.6.1,prot_P-littoralis_Contig1309.8.1,prot_P-littoralis_Contig134.114.1,prot_P-littoralis_Contig167.50.1,prot_P-littoralis_Contig377.40.1,prot_P-littoralis_Contig4.42.1,prot_P-littoralis_Contig4.43.1,prot_P-littoralis_Contig434.35.12,prot_P-littoralis_Contig95.117.3,prot_P-littoralis_Contig989.21.1,prot_P-littoralis_Contig989.22.1	prot_S-polyschides_M_contig8206.17938.1	prot_S-promiscuus_M_contig5.14428.1	SJ02957,SJ09431,SJ11459,SJ15836,SJ19476,SJ22207	prot_S-latissima_F_contig1399.2922.1,prot_S-latissima_F_contig255.7991.1,prot_S-latissima_F_contig618.13985.1,prot_S-latissima_F_contig792.15826.1	prot_S-rigidula_F_contig11167.1.1,prot_S-rigidula_F_contig11783.2.1,prot_S-rigidula_F_contig12115.2.1,prot_S-rigidula_F_contig16704.1.1,prot_S-rigidula_F_contig17704.3.1,prot_S-rigidula_F_contig18148.2.1,prot_S-rigidula_F_contig19060.1.2,prot_S-rigidula_F_contig1924.4.1,prot_S-rigidula_F_contig655.2.1,prot_S-rigidula_F_contig8041.5.1,prot_S-rigidula_F_contig9171.1.1
OG0000173	FALSE	prot_D-dichotoma_M_contig278.9573.1,prot_D-dichotoma_M_contig35.11864.1,prot_D-dichotoma_M_contig35.11866.1,prot_D-dichotoma_M_contig37.12400.1,prot_D-dichotoma_M_contig37.12401.1	Ec-02_000190.1,Ec-11_000120.1,Ec-11_004630.1,Ec-12_008450.1,Ec-13_000370.1,Ec-13_000380.1,Ec-13_000390.1,Ec-13_000430.1	prot_M-pyrifera_M_contig5821.14655.1,prot_M-pyrifera_M_contig8933.20707.1	prot_M-clavaeformis_F_contig100.66.1,prot_M-clavaeformis_F_contig2047.6462.1,prot_M-clavaeformis_F_contig2211.7107.1,prot_M-clavaeformis_F_contig2211.7108.1,prot_M-clavaeformis_F_contig232.7482.1,prot_M-clavaeformis_F_contig3863.12129.1,prot_M-clavaeformis_F_contig550.15539.1	prot_P-littoralis_Contig1239.3.3,prot_P-littoralis_Contig303.85.2,prot_P-littoralis_Contig43.23.3,prot_P-littoralis_Contig443.9.3,prot_P-littoralis_Contig546.17.2,prot_P-littoralis_Contig89.12.1,prot_P-littoralis_Contig89.7.3	prot_S-polyschides_M_contig60711.15470.1	prot_S-promiscuus_M_contig10.1050.1,prot_S-promiscuus_M_contig22.6315.1,prot_S-promiscuus_M_contig43.13344.1,prot_S-promiscuus_M_contig48.13992.1,prot_S-promiscuus_M_contig58.15814.1,prot_S-promiscuus_M_contig58.15816.1	SJ03065,SJ05655,SJ05659,SJ07401,SJ21866	prot_S-latissima_F_contig257.8052.1,prot_S-latissima_F_contig566.13409.1,prot_S-latissima_F_contig566.13411.1,prot_S-latissima_F_contig602.13838.1,prot_S-latissima_F_contig803.15908.1	prot_S-rigidula_F_contig690.1.1
OG0000174	FALSE	NA	NA	prot_M-pyrifera_M_contig5191.13546.1	prot_M-clavaeformis_F_contig7973.19198.1	NA	prot_S-polyschides_M_contig48146.13739.1	NA	SJ00246,SJ00255,SJ00534,SJ00544,SJ00568,SJ02197,SJ02225,SJ02226,SJ03473,SJ03795,SJ03848,SJ03885,SJ05057,SJ06521,SJ07851,SJ07854,SJ09182,SJ09305,SJ09533,SJ10522,SJ10753,SJ11154,SJ12181,SJ12706,SJ14134,SJ14871,SJ15135,SJ16205,SJ17456,SJ18151,SJ18719,SJ18793,SJ20870,SJ21449,SJ21823	prot_S-latissima_F_contig1025.231.1,prot_S-latissima_F_contig1302.2300.1,prot_S-latissima_F_contig1367.2721.1,prot_S-latissima_F_contig138.2828.1,prot_S-latissima_F_contig2894.8976.1,prot_S-latissima_F_contig307.9434.1,prot_S-latissima_F_contig3711.10653.1,prot_S-latissima_F_contig61.13923.1	prot_S-rigidula_F_contig9463.1.1
OG0000175	FALSE	prot_D-dichotoma_M_contig1065.603.1,prot_D-dichotoma_M_contig1306.2369.1,prot_D-dichotoma_M_contig1690.4713.1,prot_D-dichotoma_M_contig2.6272.1,prot_D-dichotoma_M_contig2151.7130.1,prot_D-dichotoma_M_contig2169.7184.1,prot_D-dichotoma_M_contig2371.8074.1,prot_D-dichotoma_M_contig397.13041.1,prot_D-dichotoma_M_contig4352.13992.1,prot_D-dichotoma_M_contig79.18719.1,prot_D-dichotoma_M_contig88.19557…	NA	prot_M-pyrifera_M_contig19361.7633.1	NA	prot_P-littoralis_Contig100.99.1,prot_P-littoralis_Contig1134.1.1,prot_P-littoralis_Contig124.100.1,prot_P-littoralis_Contig1264.25.1,prot_P-littoralis_Contig1271.1.1,prot_P-littoralis_Contig1282.2.1,prot_P-littoralis_Contig13.144.1,prot_P-littoralis_Contig136.87.1,prot_P-littoralis_Contig160.40.1,prot_P-littoralis_Contig18.132.1,prot_P-littoralis_Contig202.2.1,prot_P-littoralis_Contig24.27.1,pro…	prot_S-polyschides_M_contig20575.6749.1,prot_S-polyschides_M_contig4613.13411.1,prot_S-polyschides_M_contig9381.19156.1	NA	NA	NA	NA
OG0000176	FALSE	prot_D-dichotoma_M_contig1053.503.1,prot_D-dichotoma_M_contig125.1950.1,prot_D-dichotoma_M_contig125.1951.1,prot_D-dichotoma_M_contig2265.7595.1,prot_D-dichotoma_M_contig2946.10179.1,prot_D-dichotoma_M_contig32.11028.1,prot_D-dichotoma_M_contig448.14216.1	Ec-12_000880.1,Ec-20_004230.1	prot_M-pyrifera_M_contig23231.8551.1,prot_M-pyrifera_M_contig4202.11999.1,prot_M-pyrifera_M_contig6051.14998.1	prot_M-clavaeformis_F_contig1085.838.1,prot_M-clavaeformis_F_contig2943.9604.1,prot_M-clavaeformis_F_contig3074.10014.1,prot_M-clavaeformis_F_contig3470.11111.1,prot_M-clavaeformis_F_contig3635.11523.1,prot_M-clavaeformis_F_contig4492.13538.1,prot_M-clavaeformis_F_contig4754.14086.1,prot_M-clavaeformis_F_contig538.15338.1,prot_M-clavaeformis_F_contig5751.15931.1,prot_M-clavaeformis_F_contig724.18…	prot_P-littoralis_Contig143.122.1,prot_P-littoralis_Contig538.26.1	prot_S-polyschides_M_contig1306.2748.1,prot_S-polyschides_M_contig16043.4624.1,prot_S-polyschides_M_contig7686.17402.1,prot_S-polyschides_M_contig7737.17439.1,prot_S-polyschides_M_contig90286.18841.1	prot_S-promiscuus_M_contig21.6124.1,prot_S-promiscuus_M_contig21.6125.1,prot_S-promiscuus_M_contig21.6126.1,prot_S-promiscuus_M_contig21.6127.1,prot_S-promiscuus_M_contig21.6128.1,prot_S-promiscuus_M_contig21.6129.1,prot_S-promiscuus_M_contig45.13662.1,prot_S-promiscuus_M_contig48.14038.1,prot_S-promiscuus_M_contig48.14039.1	SJ09087,SJ11348,SJ11349,SJ11355	prot_S-latissima_F_contig515.12825.1,prot_S-latissima_F_contig526.13006.1	NA
OG0000177	FALSE	prot_D-dichotoma_M_contig215.7109.1,prot_D-dichotoma_M_contig568.16441.1,prot_D-dichotoma_M_contig568.16442.1,prot_D-dichotoma_M_contig923.19967.1	Ec-11_003000.1,Ec-13_002870.1	NA	prot_M-clavaeformis_F_contig1133.1258.1,prot_M-clavaeformis_F_contig1932.5934.1,prot_M-clavaeformis_F_contig3216.10418.1,prot_M-clavaeformis_F_contig3216.10419.1,prot_M-clavaeformis_F_contig645.17062.1	prot_P-littoralis_Contig171.84.1,prot_P-littoralis_Contig171.85.1,prot_P-littoralis_Contig403.28.1,prot_P-littoralis_Contig403.34.1,prot_P-littoralis_Contig448.23.2	prot_S-polyschides_M_contig4868.13812.1	prot_S-promiscuus_M_contig1.296.1,prot_S-promiscuus_M_contig10.996.1,prot_S-promiscuus_M_contig7.17120.1,prot_S-promiscuus_M_contig7.17121.1,prot_S-promiscuus_M_contig7.17122.1	SJ00369,SJ00874,SJ02732,SJ02967,SJ03007,SJ09455,SJ10194,SJ12607,SJ17571,SJ17765,SJ19136,SJ19383,SJ19384,SJ19389,SJ20466,SJ21912	prot_S-latissima_F_contig101.100.1,prot_S-latissima_F_contig103.269.1,prot_S-latissima_F_contig1464.3356.1,prot_S-latissima_F_contig1480.3451.1,prot_S-latissima_F_contig1828.5171.1,prot_S-latissima_F_contig916.16938.1,prot_S-latissima_F_contig916.16939.1	prot_S-rigidula_F_contig2496.1.1
OG0000178	FALSE	prot_D-dichotoma_M_contig1047.472.1,prot_D-dichotoma_M_contig3731.12483.1,prot_D-dichotoma_M_contig677.17671.1,prot_D-dichotoma_M_contig742.18266.1	Ec-00_003960.1,Ec-03_000350.1,Ec-03_000360.1,Ec-10_000770.1,Ec-12_009050.1,Ec-18_000370.1,Ec-22_000920.1	prot_M-pyrifera_M_contig32748.10470.1,prot_M-pyrifera_M_contig35680.10976.1,prot_M-pyrifera_M_contig841.19620.1	prot_M-clavaeformis_F_contig1360.2836.1,prot_M-clavaeformis_F_contig1938.5951.1,prot_M-clavaeformis_F_contig2391.7748.1,prot_M-clavaeformis_F_contig2531.8270.1,prot_M-clavaeformis_F_contig2849.9336.1,prot_M-clavaeformis_F_contig6247.16756.1	NA	prot_S-polyschides_M_contig2307.7842.1,prot_S-polyschides_M_contig28299.9554.1,prot_S-polyschides_M_contig2869.9668.1,prot_S-polyschides_M_contig3343.10880.1	prot_S-promiscuus_M_contig1.245.1,prot_S-promiscuus_M_contig1.247.1,prot_S-promiscuus_M_contig17.4027.1,prot_S-promiscuus_M_contig24.7165.1,prot_S-promiscuus_M_contig30.9763.1,prot_S-promiscuus_M_contig30.9828.1,prot_S-promiscuus_M_contig33.10361.1,prot_S-promiscuus_M_contig36.11032.1,prot_S-promiscuus_M_contig37.11399.1,prot_S-promiscuus_M_contig40.12900.1,prot_S-promiscuus_M_contig48.14065.1,pr…	SJ03840,SJ03842,SJ03843,SJ03887,SJ21189	prot_S-latissima_F_contig1638.4295.1,prot_S-latissima_F_contig1638.4298.1,prot_S-latissima_F_contig1735.4775.1,prot_S-latissima_F_contig18.5051.1,prot_S-latissima_F_contig506.12678.1	NA
OG0000179	FALSE	prot_D-dichotoma_M_contig1014.211.1,prot_D-dichotoma_M_contig1059.541.1,prot_D-dichotoma_M_contig1165.1360.1,prot_D-dichotoma_M_contig2397.8175.1	Ec-15_000020.1,Ec-15_000160.1,Ec-15_000190.1,Ec-15_000230.1,Ec-15_000240.1,Ec-15_000340.1	prot_M-pyrifera_M_contig6980.16719.1	prot_M-clavaeformis_F_contig1173.1556.1,prot_M-clavaeformis_F_contig1173.1557.1,prot_M-clavaeformis_F_contig1173.1558.1,prot_M-clavaeformis_F_contig282.9244.1,prot_M-clavaeformis_F_contig931.20623.1	prot_P-littoralis_Contig360.65.1,prot_P-littoralis_Contig651.26.5,prot_P-littoralis_Contig766.29.3	prot_S-polyschides_M_contig2340.7947.1,prot_S-polyschides_M_contig2961.9906.1,prot_S-polyschides_M_contig908.18897.1	prot_S-promiscuus_M_contig11.1779.1,prot_S-promiscuus_M_contig11.1803.1,prot_S-promiscuus_M_contig11.1804.1,prot_S-promiscuus_M_contig11.1805.1,prot_S-promiscuus_M_contig11.1808.1,prot_S-promiscuus_M_contig3.9186.1	SJ18635,SJ20884,SJ20887,SJ20888,SJ20889,SJ20890,SJ20891,SJ20892,SJ20894,SJ20895,SJ20897,SJ20898,SJ20899,SJ20900	prot_S-latissima_F_contig392.10980.1,prot_S-latissima_F_contig392.10981.1,prot_S-latissima_F_contig4144.11372.1	prot_S-rigidula_F_contig5675.3.1
OG0000180	FALSE	NA	Ec-24_003000.1	prot_M-pyrifera_M_contig18584.7446.1,prot_M-pyrifera_M_contig18584.7447.1,prot_M-pyrifera_M_contig4821.12934.1	prot_M-clavaeformis_F_contig2691.8821.1,prot_M-clavaeformis_F_contig287.9388.1,prot_M-clavaeformis_F_contig3438.11031.1,prot_M-clavaeformis_F_contig3849.12093.1,prot_M-clavaeformis_F_contig748.18573.1,prot_M-clavaeformis_F_contig748.18574.1,prot_M-clavaeformis_F_contig913.20444.1	prot_P-littoralis_Contig122.110.2,prot_P-littoralis_Contig507.34.3,prot_P-littoralis_Contig524.8.1,prot_P-littoralis_Contig886.19.1	prot_S-polyschides_M_contig94414.19228.1	prot_S-promiscuus_M_contig3.8737.1,prot_S-promiscuus_M_contig31.10039.1,prot_S-promiscuus_M_contig32.10274.1,prot_S-promiscuus_M_contig39.11861.1,prot_S-promiscuus_M_contig45.13746.1,prot_S-promiscuus_M_contig5.14739.1,prot_S-promiscuus_M_contig5.14742.1,prot_S-promiscuus_M_contig5.14744.1,prot_S-promiscuus_M_contig5.14748.1,prot_S-promiscuus_M_contig5.14749.1	SJ02399,SJ04836,SJ05066,SJ08254,SJ10369,SJ10370,SJ10374,SJ10375,SJ22083,SJ22092	prot_S-latissima_F_contig1016.156.1,prot_S-latissima_F_contig210.6398.1	prot_S-rigidula_F_contig16563.2.1,prot_S-rigidula_F_contig2499.1.1,prot_S-rigidula_F_contig2547.2.1,prot_S-rigidula_F_contig2654.1.1,prot_S-rigidula_F_contig2654.4.1,prot_S-rigidula_F_contig3938.1.1,prot_S-rigidula_F_contig9351.1.1,prot_S-rigidula_F_contig9351.2.1
OG0000181	FALSE	NA	Ec-21_002200.1,Ec-23_002890.1,Ec-25_002180.1	prot_M-pyrifera_M_contig22965.8485.1,prot_M-pyrifera_M_contig942.21751.1	prot_M-clavaeformis_F_contig1017.234.1,prot_M-clavaeformis_F_contig2233.7181.1,prot_M-clavaeformis_F_contig633.16882.1,prot_M-clavaeformis_F_contig751.18620.1	prot_P-littoralis_Contig1129.37.1,prot_P-littoralis_Contig1194.16.1,prot_P-littoralis_Contig1245.11.1,prot_P-littoralis_Contig126.9.1,prot_P-littoralis_Contig15.110.1,prot_P-littoralis_Contig156.146.2,prot_P-littoralis_Contig18.124.1,prot_P-littoralis_Contig185.19.1,prot_P-littoralis_Contig212.93.1,prot_P-littoralis_Contig243.34.1,prot_P-littoralis_Contig252.55.1,prot_P-littoralis_Contig303.61.1,…	prot_S-polyschides_M_contig110.902.1,prot_S-polyschides_M_contig2153.7167.1,prot_S-polyschides_M_contig341.11048.1,prot_S-polyschides_M_contig3988.12308.1	prot_S-promiscuus_M_contig4.12717.1,prot_S-promiscuus_M_contig44.13456.1,prot_S-promiscuus_M_contig52.15280.1,prot_S-promiscuus_M_contig74.17689.1	NA	prot_S-latissima_F_contig102.177.1,prot_S-latissima_F_contig714.15010.1	prot_S-rigidula_F_contig13723.1.1,prot_S-rigidula_F_contig5650.3.1,prot_S-rigidula_F_contig5798.3.1
OG0000182	FALSE	NA	Ec-00_004220.1,Ec-00_004690.1,Ec-02_002240.1,Ec-16_004190.1,Ec-21_000140.1,Ec-26_002540.1	NA	NA	prot_P-littoralis_Contig1193.6.3,prot_P-littoralis_Contig1594.3.1,prot_P-littoralis_Contig163.70.1,prot_P-littoralis_Contig267.22.2,prot_P-littoralis_Contig402.1.2,prot_P-littoralis_Contig481.42.3,prot_P-littoralis_Contig523.32.1,prot_P-littoralis_Contig576.1.1,prot_P-littoralis_Contig84.78.1	prot_S-polyschides_M_contig102111.200.1,prot_S-polyschides_M_contig76306.17349.1,prot_S-polyschides_M_contig85339.18288.1	prot_S-promiscuus_M_contig18.4065.1,prot_S-promiscuus_M_contig26.7669.1,prot_S-promiscuus_M_contig53.15435.1,prot_S-promiscuus_M_contig53.15447.1,prot_S-promiscuus_M_contig54.15509.1	SJ07146	prot_S-latissima_F_contig3714.10654.1	prot_S-rigidula_F_contig10628.1.1,prot_S-rigidula_F_contig1165.1.1,prot_S-rigidula_F_contig12179.2.1,prot_S-rigidula_F_contig12223.2.1,prot_S-rigidula_F_contig13304.1.1,prot_S-rigidula_F_contig13888.1.1,prot_S-rigidula_F_contig14676.5.1,prot_S-rigidula_F_contig16231.1.1,prot_S-rigidula_F_contig16943.2.1,prot_S-rigidula_F_contig16943.3.1,prot_S-rigidula_F_contig18212.1.1,prot_S-rigidula_F_contig19…
OG0000183	FALSE	prot_D-dichotoma_M_contig1133.1130.1,prot_D-dichotoma_M_contig1199.1606.1,prot_D-dichotoma_M_contig133.2542.1,prot_D-dichotoma_M_contig1364.2719.1,prot_D-dichotoma_M_contig1422.3102.1,prot_D-dichotoma_M_contig1541.3826.1,prot_D-dichotoma_M_contig177.5120.1,prot_D-dichotoma_M_contig1913.5847.1,prot_D-dichotoma_M_contig212.6948.1,prot_D-dichotoma_M_contig221.7386.1,prot_D-dichotoma_M_contig2546.875…	NA	NA	NA	prot_P-littoralis_Contig1063.11.1,prot_P-littoralis_Contig15.150.2,prot_P-littoralis_Contig158.3.1,prot_P-littoralis_Contig562.15.1,prot_P-littoralis_Contig771.2.1,prot_P-littoralis_Contig899.17.1,prot_P-littoralis_Contig899.18.1,prot_P-littoralis_Contig930.13.1	NA	NA	SJ07599,SJ18883	prot_S-latissima_F_contig2043.6192.1	NA
OG0000184	FALSE	prot_D-dichotoma_M_contig1224.1788.1,prot_D-dichotoma_M_contig1471.3405.1,prot_D-dichotoma_M_contig1579.4013.1,prot_D-dichotoma_M_contig4039.13255.1,prot_D-dichotoma_M_contig634.17278.1	Ec-14_005690.1,Ec-25_000330.1,Ec-25_000340.1,Ec-25_000350.1,Ec-25_000360.1,Ec-25_000370.1,Ec-25_000380.1	prot_M-pyrifera_M_contig4415.12327.1,prot_M-pyrifera_M_contig607.15037.1,prot_M-pyrifera_M_contig8262.19311.1	prot_M-clavaeformis_F_contig6.16344.1,prot_M-clavaeformis_F_contig700.17925.1,prot_M-clavaeformis_F_contig700.17926.1	prot_P-littoralis_Contig1076.9.3,prot_P-littoralis_Contig1162.15.1,prot_P-littoralis_Contig15.236.1,prot_P-littoralis_Contig15.246.4,prot_P-littoralis_Contig324.5.1,prot_P-littoralis_Contig324.5.2	prot_S-polyschides_M_contig37457.11797.1,prot_S-polyschides_M_contig44905.13203.1,prot_S-polyschides_M_contig54611.14628.1,prot_S-polyschides_M_contig66744.16270.1	prot_S-promiscuus_M_contig38.11532.1,prot_S-promiscuus_M_contig38.11537.1,prot_S-promiscuus_M_contig38.11538.1	SJ01386,SJ01531,SJ01534,SJ06132,SJ06643,SJ06783,SJ06784,SJ10570,SJ11098,SJ18785	prot_S-latissima_F_contig1098.784.1,prot_S-latissima_F_contig638.14179.1,prot_S-latissima_F_contig638.14180.1	prot_S-rigidula_F_contig27113.1.1
OG0000185	FALSE	prot_D-dichotoma_M_contig1282.2161.1,prot_D-dichotoma_M_contig1305.2364.1,prot_D-dichotoma_M_contig257.8840.1,prot_D-dichotoma_M_contig2857.9849.1,prot_D-dichotoma_M_contig2882.9952.1,prot_D-dichotoma_M_contig336.11502.1,prot_D-dichotoma_M_contig491.15111.1	Ec-01_001240.1,Ec-05_003560.1,Ec-09_004720.1	prot_M-pyrifera_M_contig11806.3751.1,prot_M-pyrifera_M_contig1556.6594.1,prot_M-pyrifera_M_contig4154.11931.1	prot_M-clavaeformis_F_contig1935.5944.1,prot_M-clavaeformis_F_contig2555.8349.1,prot_M-clavaeformis_F_contig3004.9797.1,prot_M-clavaeformis_F_contig381.12001.1,prot_M-clavaeformis_F_contig3813.12009.1,prot_M-clavaeformis_F_contig4363.13270.1,prot_M-clavaeformis_F_contig500.14613.1,prot_M-clavaeformis_F_contig808.19322.1	prot_P-littoralis_Contig250.38.3,prot_P-littoralis_Contig474.24.2,prot_P-littoralis_Contig578.45.1,prot_P-littoralis_Contig638.6.1,prot_P-littoralis_Contig673.6.2,prot_P-littoralis_Contig69.142.2	prot_S-polyschides_M_contig15931.4540.1,prot_S-polyschides_M_contig1698.5130.1,prot_S-polyschides_M_contig35842.11467.1	prot_S-promiscuus_M_contig1.727.1,prot_S-promiscuus_M_contig12.1907.1,prot_S-promiscuus_M_contig20.5956.1,prot_S-promiscuus_M_contig20.5957.1,prot_S-promiscuus_M_contig34.10574.1	SJ15462,SJ19188,SJ19388,SJ20455	prot_S-latissima_F_contig121.1635.1,prot_S-latissima_F_contig179.4989.1,prot_S-latissima_F_contig2183.6689.1,prot_S-latissima_F_contig266.8296.1,prot_S-latissima_F_contig347.10232.1	prot_S-rigidula_F_contig5148.2.1
OG0000186	FALSE	prot_D-dichotoma_M_contig118.1453.1,prot_D-dichotoma_M_contig2153.7135.1,prot_D-dichotoma_M_contig678.17673.1,prot_D-dichotoma_M_contig678.17674.1	Ec-11_002650.1,Ec-11_002830.1,Ec-11_002840.1,Ec-11_002850.1,Ec-18_000270.1,Ec-19_003530.1,Ec-19_003540.1,Ec-19_003550.1,Ec-19_003970.1,Ec-19_004020.1,Ec-19_004030.1	prot_M-pyrifera_M_contig47.12741.1	prot_M-clavaeformis_F_contig10458.478.1,prot_M-clavaeformis_F_contig10475.495.1,prot_M-clavaeformis_F_contig10540.558.1,prot_M-clavaeformis_F_contig3501.11197.1,prot_M-clavaeformis_F_contig4184.12888.1,prot_M-clavaeformis_F_contig4892.14366.1	prot_P-littoralis_Contig1407.2.1,prot_P-littoralis_Contig238.38.1,prot_P-littoralis_Contig238.39.2,prot_P-littoralis_Contig468.1.1	prot_S-polyschides_M_contig10551.492.1,prot_S-polyschides_M_contig728.16967.1,prot_S-polyschides_M_contig728.16968.1,prot_S-polyschides_M_contig728.16969.1	prot_S-promiscuus_M_contig21.6102.1,prot_S-promiscuus_M_contig21.6103.1,prot_S-promiscuus_M_contig21.6106.1	SJ01601,SJ04075,SJ04080,SJ04505,SJ04506,SJ06537,SJ12608,SJ12609,SJ20411,SJ20412	prot_S-latissima_F_contig1196.1524.1	prot_S-rigidula_F_contig4842.1.1
OG0000187	FALSE	prot_D-dichotoma_M_contig184.5457.1,prot_D-dichotoma_M_contig548.16129.1,prot_D-dichotoma_M_contig85.19281.1,prot_D-dichotoma_M_contig894.19697.1	Ec-08_005040.1,Ec-10_003370.1,Ec-10_003380.1,Ec-10_003390.1,Ec-10_003700.1,Ec-27_002330.1	prot_M-pyrifera_M_contig1503.6433.1,prot_M-pyrifera_M_contig17385.7112.1,prot_M-pyrifera_M_contig1984.7755.1,prot_M-pyrifera_M_contig3497.10871.1,prot_M-pyrifera_M_contig7773.18285.1,prot_M-pyrifera_M_contig8.18761.1	prot_M-clavaeformis_F_contig1196.1721.1,prot_M-clavaeformis_F_contig1560.4086.1,prot_M-clavaeformis_F_contig345.11063.1,prot_M-clavaeformis_F_contig73.18339.1,prot_M-clavaeformis_F_contig81.19341.1	prot_P-littoralis_Contig164.11.3	prot_S-polyschides_M_contig1080.724.1,prot_S-polyschides_M_contig1263.2398.1,prot_S-polyschides_M_contig16411.4833.1,prot_S-polyschides_M_contig2901.9733.1	prot_S-promiscuus_M_contig29.8539.1,prot_S-promiscuus_M_contig33.10376.1,prot_S-promiscuus_M_contig6.16571.1,prot_S-promiscuus_M_contig9.18855.1,prot_S-promiscuus_M_contig9.18866.1,prot_S-promiscuus_M_contig9.19130.1	SJ01806,SJ01919,SJ06079,SJ07087,SJ09755,SJ16254,SJ18672	prot_S-latissima_F_contig566.13412.1,prot_S-latissima_F_contig588.13626.1,prot_S-latissima_F_contig738.15241.1,prot_S-latissima_F_contig851.16407.1	prot_S-rigidula_F_contig10582.1.1,prot_S-rigidula_F_contig24959.1.1
OG0000188	FALSE	NA	NA	prot_M-pyrifera_M_contig2221.8310.1,prot_M-pyrifera_M_contig2221.8311.1	NA	prot_P-littoralis_Contig10.175.1,prot_P-littoralis_Contig102.50.3,prot_P-littoralis_Contig107.23.1,prot_P-littoralis_Contig1184.3.1,prot_P-littoralis_Contig1239.4.1,prot_P-littoralis_Contig1330.8.1,prot_P-littoralis_Contig144.78.1,prot_P-littoralis_Contig180.30.1,prot_P-littoralis_Contig245.61.2,prot_P-littoralis_Contig292.40.1,prot_P-littoralis_Contig30.96.2,prot_P-littoralis_Contig352.62.2,prot…	NA	prot_S-promiscuus_M_contig26.7601.1	NA	prot_S-latissima_F_contig55.13216.1	NA
OG0000189	FALSE	NA	Ec-00_006860.1,Ec-06_001320.1,Ec-08_002910.1	prot_M-pyrifera_M_contig2970.9881.1	prot_M-clavaeformis_F_contig222.7131.1	prot_P-littoralis_Contig1081.9.1,prot_P-littoralis_Contig118.41.1,prot_P-littoralis_Contig1388.4.1,prot_P-littoralis_Contig1395.1.1,prot_P-littoralis_Contig1395.2.1,prot_P-littoralis_Contig174.138.1,prot_P-littoralis_Contig174.16.1,prot_P-littoralis_Contig216.5.1,prot_P-littoralis_Contig216.7.1,prot_P-littoralis_Contig241.7.1,prot_P-littoralis_Contig25.31.1,prot_P-littoralis_Contig25.32.1,prot_P-…	NA	prot_S-promiscuus_M_contig21.5982.1,prot_S-promiscuus_M_contig28.8179.1,prot_S-promiscuus_M_contig34.10581.1,prot_S-promiscuus_M_contig45.13763.1	SJ09292,SJ16601,SJ21451	prot_S-latissima_F_contig225.6930.1,prot_S-latissima_F_contig262.8191.1	prot_S-rigidula_F_contig2954.2.1
OG0000190	FALSE	NA	Ec-19_001040.1,Ec-19_002910.1,Ec-21_001630.1,Ec-21_002020.1,Ec-21_002100.1,Ec-21_002120.1,Ec-22_001330.1	prot_M-pyrifera_M_contig40772.11812.1,prot_M-pyrifera_M_contig5434.13965.1	prot_M-clavaeformis_F_contig6938.17755.1	prot_P-littoralis_Contig135.123.1,prot_P-littoralis_Contig283.90.1	prot_S-polyschides_M_contig100142.14.1,prot_S-polyschides_M_contig19783.6420.1,prot_S-polyschides_M_contig36407.11571.1,prot_S-polyschides_M_contig55671.14786.1,prot_S-polyschides_M_contig649.16025.1,prot_S-polyschides_M_contig6893.16514.1,prot_S-polyschides_M_contig7130.16803.1	prot_S-promiscuus_M_contig110.1828.1,prot_S-promiscuus_M_contig110.1829.1,prot_S-promiscuus_M_contig19.4339.1,prot_S-promiscuus_M_contig19.4354.1,prot_S-promiscuus_M_contig19.4355.1,prot_S-promiscuus_M_contig19.4356.1,prot_S-promiscuus_M_contig32.10319.1,prot_S-promiscuus_M_contig32.10355.1,prot_S-promiscuus_M_contig59.15850.1,prot_S-promiscuus_M_contig59.15861.1,prot_S-promiscuus_M_contig59.1586…	SJ03262,SJ03499,SJ06368,SJ06369,SJ10287,SJ10751	prot_S-latissima_F_contig1087.706.1,prot_S-latissima_F_contig3518.10318.1,prot_S-latissima_F_contig3518.10319.1,prot_S-latissima_F_contig3518.10320.1,prot_S-latissima_F_contig3639.10525.1,prot_S-latissima_F_contig3639.10527.1	prot_S-rigidula_F_contig6909.1.1
OG0000191	FALSE	NA	Ec-00_004110.1,Ec-00_008760.1,Ec-02_005760.1	prot_M-pyrifera_M_contig50547.13327.1	prot_M-clavaeformis_F_contig1607.4366.1	prot_P-littoralis_Contig1015.16.4,prot_P-littoralis_Contig111.83.1,prot_P-littoralis_Contig1125.13.1,prot_P-littoralis_Contig1135.8.2,prot_P-littoralis_Contig1196.3.1,prot_P-littoralis_Contig1201.2.6,prot_P-littoralis_Contig1293.8.1,prot_P-littoralis_Contig173.23.1,prot_P-littoralis_Contig209.4.5,prot_P-littoralis_Contig249.70.2,prot_P-littoralis_Contig250.42.2,prot_P-littoralis_Contig256.16.3,pr…	NA	prot_S-promiscuus_M_contig53.15398.1,prot_S-promiscuus_M_contig68.16947.1	SJ03560,SJ06357,SJ11511	prot_S-latissima_F_contig165.4360.1,prot_S-latissima_F_contig606.13896.1	prot_S-rigidula_F_contig5225.1.1
OG0000192	FALSE	NA	Ec-02_000010.1,Ec-08_006220.1	NA	prot_M-clavaeformis_F_contig1109.1029.1,prot_M-clavaeformis_F_contig7846.19020.1	prot_P-littoralis_Contig1014.7.1,prot_P-littoralis_Contig1128.3.2,prot_P-littoralis_Contig1177.7.1,prot_P-littoralis_Contig1204.5.1,prot_P-littoralis_Contig122.4.1,prot_P-littoralis_Contig138.79.1,prot_P-littoralis_Contig144.93.1,prot_P-littoralis_Contig158.129.1,prot_P-littoralis_Contig166.46.1,prot_P-littoralis_Contig198.24.1,prot_P-littoralis_Contig202.6.1,prot_P-littoralis_Contig236.64.1,prot…	prot_S-polyschides_M_contig1178.1663.1,prot_S-polyschides_M_contig12320.2165.1,prot_S-polyschides_M_contig17076.5175.1,prot_S-polyschides_M_contig26556.9038.1,prot_S-polyschides_M_contig29175.9784.1,prot_S-polyschides_M_contig31365.10353.1,prot_S-polyschides_M_contig37932.11895.1,prot_S-polyschides_M_contig48353.13781.1,prot_S-polyschides_M_contig51504.14217.1,prot_S-polyschides_M_contig5443.1461…	NA	NA	NA	NA
OG0000193	FALSE	prot_D-dichotoma_M_contig1140.1181.1,prot_D-dichotoma_M_contig1324.2500.1,prot_D-dichotoma_M_contig149.3508.1,prot_D-dichotoma_M_contig153.3763.1,prot_D-dichotoma_M_contig1718.4881.1,prot_D-dichotoma_M_contig177.5117.1,prot_D-dichotoma_M_contig1889.5698.1,prot_D-dichotoma_M_contig2288.7698.1,prot_D-dichotoma_M_contig2378.8095.1,prot_D-dichotoma_M_contig2534.8722.1,prot_D-dichotoma_M_contig2673.92…	NA	NA	NA	prot_P-littoralis_Contig1291.4.1,prot_P-littoralis_Contig497.8.1,prot_P-littoralis_Contig555.5.1,prot_P-littoralis_Contig789.36.1,prot_P-littoralis_Contig797.1.1	NA	prot_S-promiscuus_M_contig15.3396.1	SJ03920,SJ07878,SJ08287,SJ10577	NA	NA
OG0000194	FALSE	prot_D-dichotoma_M_contig1605.4232.1,prot_D-dichotoma_M_contig3271.11252.1,prot_D-dichotoma_M_contig581.16655.1	Ec-06_009410.1	prot_M-pyrifera_M_contig67499.16295.1	NA	prot_P-littoralis_Contig1000.36.1,prot_P-littoralis_Contig1019.2.1,prot_P-littoralis_Contig1075.6.1,prot_P-littoralis_Contig116.10.1,prot_P-littoralis_Contig1231.5.1,prot_P-littoralis_Contig1304.3.1,prot_P-littoralis_Contig152.68.3,prot_P-littoralis_Contig163.73.1,prot_P-littoralis_Contig248.28.1,prot_P-littoralis_Contig266.67.1,prot_P-littoralis_Contig31.91.2,prot_P-littoralis_Contig338.16.1,pro…	prot_S-polyschides_M_contig574.15048.1,prot_S-polyschides_M_contig70367.16691.1	NA	SJ05101,SJ15219	prot_S-latissima_F_contig187.5331.1	prot_S-rigidula_F_contig5123.3.1
OG0000195	FALSE	prot_D-dichotoma_M_contig196.6053.1,prot_D-dichotoma_M_contig2.6240.1,prot_D-dichotoma_M_contig2335.7919.1,prot_D-dichotoma_M_contig967.20364.1	Ec-02_004820.1,Ec-03_000090.1,Ec-26_005460.1,Ec-26_005470.1	prot_M-pyrifera_M_contig13400.5949.1,prot_M-pyrifera_M_contig38802.11538.1,prot_M-pyrifera_M_contig7505.17729.1,prot_M-pyrifera_M_contig76533.18041.1	prot_M-clavaeformis_F_contig1729.5023.1,prot_M-clavaeformis_F_contig2282.7346.1,prot_M-clavaeformis_F_contig457.13695.1,prot_M-clavaeformis_F_contig4881.14348.1,prot_M-clavaeformis_F_contig9240.20559.1,prot_M-clavaeformis_F_contig968.20977.1,prot_M-clavaeformis_F_contig990.21198.1	prot_P-littoralis_Contig181.37.1,prot_P-littoralis_Contig285.22.1,prot_P-littoralis_Contig285.26.1,prot_P-littoralis_Contig693.24.1	prot_S-polyschides_M_contig3217.10564.1,prot_S-polyschides_M_contig3217.10565.1,prot_S-polyschides_M_contig3223.10580.1,prot_S-polyschides_M_contig3223.10581.1,prot_S-polyschides_M_contig887.18698.1	prot_S-promiscuus_M_contig14.2990.1,prot_S-promiscuus_M_contig47.13947.1,prot_S-promiscuus_M_contig47.13949.1,prot_S-promiscuus_M_contig8.18002.1,prot_S-promiscuus_M_contig8.18003.1,prot_S-promiscuus_M_contig8.18005.1	SJ01361,SJ13352,SJ22453	prot_S-latissima_F_contig1703.4640.1,prot_S-latissima_F_contig1703.4641.1,prot_S-latissima_F_contig2224.6854.1,prot_S-latissima_F_contig508.12714.1	prot_S-rigidula_F_contig20715.2.1,prot_S-rigidula_F_contig2131.1.2,prot_S-rigidula_F_contig7030.1.1
OG0000196	FALSE	prot_D-dichotoma_M_contig1255.1989.1,prot_D-dichotoma_M_contig765.18508.1,prot_D-dichotoma_M_contig765.18509.1,prot_D-dichotoma_M_contig765.18510.1	Ec-00_008940.1,Ec-05_006600.1,Ec-05_006610.1,Ec-08_003990.1,Ec-20_002730.1,Ec-20_002770.1	prot_M-pyrifera_M_contig5529.14131.1,prot_M-pyrifera_M_contig5948.14839.1,prot_M-pyrifera_M_contig6013.14947.1	prot_M-clavaeformis_F_contig258.8428.1,prot_M-clavaeformis_F_contig3449.11056.1,prot_M-clavaeformis_F_contig620.16687.1,prot_M-clavaeformis_F_contig639.16967.1,prot_M-clavaeformis_F_contig8750.20025.1	prot_P-littoralis_Contig183.8.2,prot_P-littoralis_Contig598.2.1,prot_P-littoralis_Contig706.48.1,prot_P-littoralis_Contig799.17.1	prot_S-polyschides_M_contig11793.1679.1,prot_S-polyschides_M_contig18990.6082.1,prot_S-polyschides_M_contig2237.7560.1,prot_S-polyschides_M_contig4700.13568.1,prot_S-polyschides_M_contig5421.14579.1,prot_S-polyschides_M_contig5461.14627.1	prot_S-promiscuus_M_contig23.6675.1,prot_S-promiscuus_M_contig23.6677.1,prot_S-promiscuus_M_contig29.8645.1,prot_S-promiscuus_M_contig29.8670.1,prot_S-promiscuus_M_contig33.10515.1,prot_S-promiscuus_M_contig5.14662.1,prot_S-promiscuus_M_contig8.18390.1	SJ03430,SJ05342,SJ09672,SJ09673,SJ09676,SJ17821	prot_S-latissima_F_contig2654.8294.1,prot_S-latissima_F_contig559.13302.1	prot_S-rigidula_F_contig3311.1.1
OG0000197	FALSE	prot_D-dichotoma_M_contig1360.2708.1,prot_D-dichotoma_M_contig287.9893.1,prot_D-dichotoma_M_contig894.19702.1	Ec-06_005120.1,Ec-11_002180.1,Ec-17_003700.1,Ec-21_002920.1	prot_M-pyrifera_M_contig18846.7509.1,prot_M-pyrifera_M_contig34207.10737.1,prot_M-pyrifera_M_contig5688.14419.1	prot_M-clavaeformis_F_contig1122.1171.1,prot_M-clavaeformis_F_contig1399.3080.1,prot_M-clavaeformis_F_contig1659.4636.1,prot_M-clavaeformis_F_contig1921.5888.1,prot_M-clavaeformis_F_contig234.7558.1,prot_M-clavaeformis_F_contig520.15012.1	prot_P-littoralis_Contig15.15.1,prot_P-littoralis_Contig164.28.3,prot_P-littoralis_Contig292.59.1,prot_P-littoralis_Contig35.28.2,prot_P-littoralis_Contig658.11.1,prot_P-littoralis_Contig93.83.1	prot_S-polyschides_M_contig1397.3394.1,prot_S-polyschides_M_contig154.4238.1,prot_S-polyschides_M_contig21692.7234.1,prot_S-polyschides_M_contig865.18392.1,prot_S-polyschides_M_contig9213.19014.1	prot_S-promiscuus_M_contig10.897.1,prot_S-promiscuus_M_contig19.4406.1,prot_S-promiscuus_M_contig6.16542.1,prot_S-promiscuus_M_contig74.17710.1	SJ03697,SJ03698,SJ16809,SJ20794,SJ21120,SJ21121	prot_S-latissima_F_contig1497.3517.1,prot_S-latissima_F_contig208.6280.1,prot_S-latissima_F_contig2775.8622.1	prot_S-rigidula_F_contig2562.1.1,prot_S-rigidula_F_contig3.14.1,prot_S-rigidula_F_contig722.1.3,prot_S-rigidula_F_contig960.2.8
OG0000198	FALSE	NA	NA	NA	prot_M-clavaeformis_F_contig7309.18348.1	prot_P-littoralis_Contig18.53.2,prot_P-littoralis_Contig18.57.1,prot_P-littoralis_Contig233.1.1,prot_P-littoralis_Contig380.15.1,prot_P-littoralis_Contig380.24.1,prot_P-littoralis_Contig380.25.1,prot_P-littoralis_Contig43.78.2,prot_P-littoralis_Contig482.10.1,prot_P-littoralis_Contig482.16.1,prot_P-littoralis_Contig482.17.1,prot_P-littoralis_Contig482.20.2,prot_P-littoralis_Contig482.21.1,prot_P-…	prot_S-polyschides_M_contig10219.207.1,prot_S-polyschides_M_contig10219.208.1	prot_S-promiscuus_M_contig13.2286.1,prot_S-promiscuus_M_contig13.2287.1,prot_S-promiscuus_M_contig13.2288.1,prot_S-promiscuus_M_contig25.7245.1,prot_S-promiscuus_M_contig4.12362.1	NA	prot_S-latissima_F_contig1306.2325.1	prot_S-rigidula_F_contig11322.1.2
OG0000199	FALSE	prot_D-dichotoma_M_contig1274.2120.1,prot_D-dichotoma_M_contig1347.2622.1,prot_D-dichotoma_M_contig14.2955.1,prot_D-dichotoma_M_contig14.2956.1,prot_D-dichotoma_M_contig1539.3809.1,prot_D-dichotoma_M_contig1759.5073.1,prot_D-dichotoma_M_contig1968.6094.1,prot_D-dichotoma_M_contig2571.8848.1,prot_D-dichotoma_M_contig297.10259.1,prot_D-dichotoma_M_contig3041.10544.1,prot_D-dichotoma_M_contig3041.10…	Ec-26_003170.1	prot_M-pyrifera_M_contig14917.6405.1,prot_M-pyrifera_M_contig57309.14495.1	prot_M-clavaeformis_F_contig10121.192.1,prot_M-clavaeformis_F_contig10504.528.1,prot_M-clavaeformis_F_contig1631.4499.1,prot_M-clavaeformis_F_contig2252.7243.1,prot_M-clavaeformis_F_contig843.19700.1,prot_M-clavaeformis_F_contig9148.20457.1	NA	prot_S-polyschides_M_contig10327.305.1,prot_S-polyschides_M_contig11671.1579.1,prot_S-polyschides_M_contig12214.2074.1	prot_S-promiscuus_M_contig17.3991.1,prot_S-promiscuus_M_contig18.4277.1	SJ11111	NA	NA
OG0000200	FALSE	prot_D-dichotoma_M_contig1323.2493.1,prot_D-dichotoma_M_contig1381.2828.1,prot_D-dichotoma_M_contig2313.7837.1,prot_D-dichotoma_M_contig3040.10543.1,prot_D-dichotoma_M_contig708.17975.1,prot_D-dichotoma_M_contig783.18667.1	Ec-03_002500.1,Ec-03_002560.1,Ec-24_003270.1,Ec-24_003300.1,Ec-24_003380.1,Ec-24_003400.1	prot_M-pyrifera_M_contig102659.573.1,prot_M-pyrifera_M_contig276.9469.1,prot_M-pyrifera_M_contig45823.12552.1,prot_M-pyrifera_M_contig95194.21966.1	prot_M-clavaeformis_F_contig1024.297.1,prot_M-clavaeformis_F_contig170.4882.1,prot_M-clavaeformis_F_contig19.5780.1,prot_M-clavaeformis_F_contig3003.9796.1,prot_M-clavaeformis_F_contig344.11036.1,prot_M-clavaeformis_F_contig499.14566.1,prot_M-clavaeformis_F_contig70.17923.1	prot_P-littoralis_Contig1037.2.91,prot_P-littoralis_Contig428.1.1	prot_S-polyschides_M_contig1316.2809.1,prot_S-polyschides_M_contig3170.10451.1	prot_S-promiscuus_M_contig31.9884.1,prot_S-promiscuus_M_contig31.9890.1,prot_S-promiscuus_M_contig31.9891.1	SJ00355,SJ18837,SJ18838,SJ18843,SJ18844,SJ19749,SJ21904,SJ21905	prot_S-latissima_F_contig1458.3338.1,prot_S-latissima_F_contig1458.3339.1,prot_S-latissima_F_contig1546.3801.1,prot_S-latissima_F_contig398.11074.1	prot_S-rigidula_F_contig23779.1.1
OG0000201	FALSE	prot_D-dichotoma_M_contig203.6464.1,prot_D-dichotoma_M_contig203.6465.1,prot_D-dichotoma_M_contig203.6466.1,prot_D-dichotoma_M_contig203.6467.1,prot_D-dichotoma_M_contig203.6471.1,prot_D-dichotoma_M_contig203.6472.1,prot_D-dichotoma_M_contig2807.9704.1	Ec-01_001290.1,Ec-19_000200.1,Ec-27_001550.1,Ec-27_001560.1	prot_M-pyrifera_M_contig22681.8414.1,prot_M-pyrifera_M_contig49110.13082.1,prot_M-pyrifera_M_contig57767.14580.1,prot_M-pyrifera_M_contig63524.15567.1,prot_M-pyrifera_M_contig6376.15608.1,prot_M-pyrifera_M_contig83817.19570.1	prot_M-clavaeformis_F_contig15315.3921.1,prot_M-clavaeformis_F_contig1790.5298.1,prot_M-clavaeformis_F_contig1815.5442.1,prot_M-clavaeformis_F_contig233.7515.1,prot_M-clavaeformis_F_contig81.19342.1	prot_P-littoralis_Contig327.38.1,prot_P-littoralis_Contig348.24.6,prot_P-littoralis_Contig730.3.67	prot_S-polyschides_M_contig10498.455.1,prot_S-polyschides_M_contig10498.457.1,prot_S-polyschides_M_contig12608.2378.1,prot_S-polyschides_M_contig5504.14697.1,prot_S-polyschides_M_contig603.15416.1,prot_S-polyschides_M_contig742.17116.1	prot_S-promiscuus_M_contig1.635.1,prot_S-promiscuus_M_contig1.637.1,prot_S-promiscuus_M_contig18.4074.1	SJ18661,SJ18670,SJ18671	prot_S-latissima_F_contig31.9508.1,prot_S-latissima_F_contig961.17376.1,prot_S-latissima_F_contig961.17377.1,prot_S-latissima_F_contig961.17378.1	prot_S-rigidula_F_contig12338.1.1,prot_S-rigidula_F_contig13445.1.2
OG0000202	FALSE	prot_D-dichotoma_M_contig1352.2659.1,prot_D-dichotoma_M_contig3768.12549.1,prot_D-dichotoma_M_contig3963.13030.1	Ec-04_004690.1,Ec-11_005310.1,Ec-15_003140.1,Ec-24_002030.1,Ec-24_002330.1,Ec-24_002370.1	prot_M-pyrifera_M_contig1070.1493.1,prot_M-pyrifera_M_contig40.11695.1,prot_M-pyrifera_M_contig417.11951.1,prot_M-pyrifera_M_contig417.11952.1	prot_M-clavaeformis_F_contig116.1454.1,prot_M-clavaeformis_F_contig1199.1739.1,prot_M-clavaeformis_F_contig1397.3066.1,prot_M-clavaeformis_F_contig2359.7632.1	NA	prot_S-polyschides_M_contig1007.78.1,prot_S-polyschides_M_contig47656.13658.1,prot_S-polyschides_M_contig4830.13773.1,prot_S-polyschides_M_contig9228.19028.1,prot_S-polyschides_M_contig9641.19432.1	prot_S-promiscuus_M_contig22.6493.1,prot_S-promiscuus_M_contig22.6495.1,prot_S-promiscuus_M_contig46.13879.1,prot_S-promiscuus_M_contig46.13880.1,prot_S-promiscuus_M_contig46.13882.1,prot_S-promiscuus_M_contig46.13887.1,prot_S-promiscuus_M_contig59.15891.1	SJ03847,SJ15917,SJ15918,SJ15919,SJ18845,SJ19180,SJ19746	prot_S-latissima_F_contig2482.7774.1,prot_S-latissima_F_contig632.14143.1,prot_S-latissima_F_contig756.15402.1,prot_S-latissima_F_contig756.15403.1,prot_S-latissima_F_contig756.15404.1,prot_S-latissima_F_contig835.16240.1	prot_S-rigidula_F_contig11327.1.1
OG0000203	FALSE	prot_D-dichotoma_M_contig1273.2110.1,prot_D-dichotoma_M_contig1712.4852.1,prot_D-dichotoma_M_contig762.18466.1,prot_D-dichotoma_M_contig808.18928.1	Ec-01_003910.1,Ec-03_003770.1,Ec-17_002700.1,Ec-21_005550.1,Ec-26_003850.1	prot_M-pyrifera_M_contig11835.3795.1,prot_M-pyrifera_M_contig3438.10765.1,prot_M-pyrifera_M_contig3476.10820.1	prot_M-clavaeformis_F_contig1725.5007.1,prot_M-clavaeformis_F_contig2334.7531.1,prot_M-clavaeformis_F_contig2698.8836.1,prot_M-clavaeformis_F_contig3112.10137.1,prot_M-clavaeformis_F_contig4316.13160.1	prot_P-littoralis_Contig149.82.1,prot_P-littoralis_Contig268.53.2,prot_P-littoralis_Contig42.189.2,prot_P-littoralis_Contig455.19.1	prot_S-polyschides_M_contig10611.549.1,prot_S-polyschides_M_contig12172.2045.1,prot_S-polyschides_M_contig8339.18064.1	prot_S-promiscuus_M_contig14.2769.1,prot_S-promiscuus_M_contig19.4584.1,prot_S-promiscuus_M_contig2.4824.1,prot_S-promiscuus_M_contig7.17531.1,prot_S-promiscuus_M_contig8.18046.1	SJ04056,SJ11623,SJ15457,SJ15655,SJ18062	prot_S-latissima_F_contig207.6258.1,prot_S-latissima_F_contig221.6815.1,prot_S-latissima_F_contig338.10077.1,prot_S-latissima_F_contig554.13278.1	prot_S-rigidula_F_contig10917.1.1,prot_S-rigidula_F_contig16621.1.1,prot_S-rigidula_F_contig5246.5.1,prot_S-rigidula_F_contig555.6.3,prot_S-rigidula_F_contig564.1.1
OG0000204	FALSE	prot_D-dichotoma_M_contig1021.277.1,prot_D-dichotoma_M_contig1132.1119.1,prot_D-dichotoma_M_contig1274.2121.1,prot_D-dichotoma_M_contig135.2649.1,prot_D-dichotoma_M_contig1395.2919.1,prot_D-dichotoma_M_contig196.6059.1,prot_D-dichotoma_M_contig2061.6622.1,prot_D-dichotoma_M_contig2100.6872.1,prot_D-dichotoma_M_contig215.7118.1,prot_D-dichotoma_M_contig2183.7251.1,prot_D-dichotoma_M_contig248.8515…	Ec-01_001030.1,Ec-26_006530.1	NA	NA	NA	prot_S-polyschides_M_contig4234.12771.1	NA	SJ00520,SJ13024,SJ13295,SJ17658,SJ22446	prot_S-latissima_F_contig1611.4181.1,prot_S-latissima_F_contig425.11536.1	prot_S-rigidula_F_contig5669.2.1,prot_S-rigidula_F_contig7973.2.1
OG0000205	FALSE	prot_D-dichotoma_M_contig183.5424.1,prot_D-dichotoma_M_contig183.5425.1,prot_D-dichotoma_M_contig183.5426.1,prot_D-dichotoma_M_contig183.5427.1,prot_D-dichotoma_M_contig183.5429.1,prot_D-dichotoma_M_contig2299.7748.1	Ec-02_004680.1,Ec-11_001390.1,Ec-19_003900.1,Ec-22_002180.1,Ec-28_000190.1	NA	prot_M-clavaeformis_F_contig1703.4895.1,prot_M-clavaeformis_F_contig2007.6306.1,prot_M-clavaeformis_F_contig2810.9220.1,prot_M-clavaeformis_F_contig3033.9886.1,prot_M-clavaeformis_F_contig4082.12654.1,prot_M-clavaeformis_F_contig4240.13008.1,prot_M-clavaeformis_F_contig5915.16218.1,prot_M-clavaeformis_F_contig62.16678.1	prot_P-littoralis_Contig120.19.1,prot_P-littoralis_Contig1439.3.1,prot_P-littoralis_Contig1439.4.1,prot_P-littoralis_Contig158.27.1,prot_P-littoralis_Contig551.8.1,prot_P-littoralis_Contig915.11.1,prot_P-littoralis_Contig915.3.1	prot_S-polyschides_M_contig2203.7441.1,prot_S-polyschides_M_contig3966.12245.1,prot_S-polyschides_M_contig4971.13955.1,prot_S-polyschides_M_contig6464.15995.1	prot_S-promiscuus_M_contig1.61.1,prot_S-promiscuus_M_contig15.3326.1,prot_S-promiscuus_M_contig30.9711.1,prot_S-promiscuus_M_contig30.9712.1,prot_S-promiscuus_M_contig36.11029.1,prot_S-promiscuus_M_contig59.15892.1,prot_S-promiscuus_M_contig7.17498.1,prot_S-promiscuus_M_contig7.17500.1,prot_S-promiscuus_M_contig8.18354.1	SJ18152	prot_S-latissima_F_contig1228.1765.1,prot_S-latissima_F_contig348.10243.1	NA
OG0000206	FALSE	prot_D-dichotoma_M_contig1058.532.1,prot_D-dichotoma_M_contig1058.533.1,prot_D-dichotoma_M_contig1879.5645.1,prot_D-dichotoma_M_contig617.17063.1	Ec-02_001010.1,Ec-25_003160.1,Ec-27_001110.1	prot_M-pyrifera_M_contig102935.623.1,prot_M-pyrifera_M_contig12345.4801.1,prot_M-pyrifera_M_contig17953.7257.1,prot_M-pyrifera_M_contig29544.9853.1,prot_M-pyrifera_M_contig6344.15556.1,prot_M-pyrifera_M_contig72805.17292.1	prot_M-clavaeformis_F_contig432.13167.1,prot_M-clavaeformis_F_contig4426.13415.1,prot_M-clavaeformis_F_contig466.13881.1,prot_M-clavaeformis_F_contig702.17950.1	prot_P-littoralis_Contig361.44.4,prot_P-littoralis_Contig573.32.1,prot_P-littoralis_Contig740.12.110	prot_S-polyschides_M_contig11954.1849.1,prot_S-polyschides_M_contig20690.6794.1,prot_S-polyschides_M_contig30778.10212.1,prot_S-polyschides_M_contig35199.11337.1,prot_S-polyschides_M_contig6786.16398.1,prot_S-polyschides_M_contig8014.17724.1	prot_S-promiscuus_M_contig1.614.1,prot_S-promiscuus_M_contig50.15097.1,prot_S-promiscuus_M_contig62.16782.1	SJ21645,SJ21646,SJ21779,SJ21781,SJ21800,SJ21801	prot_S-latissima_F_contig628.14086.1,prot_S-latissima_F_contig77.15546.1,prot_S-latissima_F_contig797.15855.1	prot_S-rigidula_F_contig23130.1.1,prot_S-rigidula_F_contig24140.1.1,prot_S-rigidula_F_contig26810.1.1,prot_S-rigidula_F_contig7781.1.1
OG0000207	FALSE	prot_D-dichotoma_M_contig1374.2767.1,prot_D-dichotoma_M_contig3365.11509.1,prot_D-dichotoma_M_contig4903.15104.1,prot_D-dichotoma_M_contig5587.16300.1,prot_D-dichotoma_M_contig689.17761.1,prot_D-dichotoma_M_contig829.19086.1	Ec-05_000010.1,Ec-05_000360.1	prot_M-pyrifera_M_contig16497.6853.1,prot_M-pyrifera_M_contig287.9680.1	prot_M-clavaeformis_F_contig4939.14475.1	prot_P-littoralis_Contig230.52.1,prot_P-littoralis_Contig523.8.2,prot_P-littoralis_Contig9.35.1	prot_S-polyschides_M_contig11064.960.1,prot_S-polyschides_M_contig3507.11308.1,prot_S-polyschides_M_contig4111.12551.1	prot_S-promiscuus_M_contig11.1532.1,prot_S-promiscuus_M_contig12.1862.1,prot_S-promiscuus_M_contig14.3097.1,prot_S-promiscuus_M_contig21.6076.1,prot_S-promiscuus_M_contig22.6590.1,prot_S-promiscuus_M_contig28.8077.1,prot_S-promiscuus_M_contig28.8080.1,prot_S-promiscuus_M_contig3.9563.1,prot_S-promiscuus_M_contig7.17096.1,prot_S-promiscuus_M_contig7.17097.1,prot_S-promiscuus_M_contig7.17101.1	SJ01015,SJ02639,SJ03561,SJ04131,SJ04134,SJ06781,SJ08951,SJ13583,SJ13584,SJ21728,SJ21955	prot_S-latissima_F_contig330.9946.1,prot_S-latissima_F_contig726.15138.1	prot_S-rigidula_F_contig2406.1.2
OG0000208	FALSE	prot_D-dichotoma_M_contig1130.1107.1,prot_D-dichotoma_M_contig95.20219.1	NA	prot_M-pyrifera_M_contig105631.1206.1,prot_M-pyrifera_M_contig93053.21505.1	prot_M-clavaeformis_F_contig14770.3572.1,prot_M-clavaeformis_F_contig14876.3631.1,prot_M-clavaeformis_F_contig1658.4634.1,prot_M-clavaeformis_F_contig1865.5650.1,prot_M-clavaeformis_F_contig500.14612.1,prot_M-clavaeformis_F_contig551.15553.1	prot_P-littoralis_Contig354.39.3,prot_P-littoralis_Contig534.26.3,prot_P-littoralis_Contig663.36.1	prot_S-polyschides_M_contig118826.1783.1,prot_S-polyschides_M_contig11904.1809.1,prot_S-polyschides_M_contig11992.1896.1,prot_S-polyschides_M_contig15.3978.1,prot_S-polyschides_M_contig2271.7712.1,prot_S-polyschides_M_contig2474.8446.1,prot_S-polyschides_M_contig27460.9313.1,prot_S-polyschides_M_contig29104.9758.1,prot_S-polyschides_M_contig3912.12158.1,prot_S-polyschides_M_contig3912.12159.1	prot_S-promiscuus_M_contig1.289.1,prot_S-promiscuus_M_contig2.5637.1,prot_S-promiscuus_M_contig7.17578.1	SJ04087,SJ06265,SJ06729,SJ07933,SJ09601,SJ09602,SJ14438,SJ17548,SJ17554,SJ17556,SJ21609,SJ21611	prot_S-latissima_F_contig1012.140.1,prot_S-latissima_F_contig138.2829.1,prot_S-latissima_F_contig2315.7205.1,prot_S-latissima_F_contig831.16203.1	NA
OG0000209	FALSE	NA	Ec-00_008110.1,Ec-03_003680.1,Ec-12_007970.1,Ec-16_005030.1,Ec-18_001930.1,Ec-22_002570.1	NA	prot_M-clavaeformis_F_contig2408.7836.1,prot_M-clavaeformis_F_contig2984.9720.1	prot_P-littoralis_Contig1064.21.1,prot_P-littoralis_Contig1272.12.1,prot_P-littoralis_Contig1272.13.1,prot_P-littoralis_Contig1399.13.1,prot_P-littoralis_Contig1508.5.1,prot_P-littoralis_Contig1621.1.1,prot_P-littoralis_Contig1628.5.1,prot_P-littoralis_Contig174.122.1,prot_P-littoralis_Contig18.43.1,prot_P-littoralis_Contig43.101.1,prot_P-littoralis_Contig87.30.1,prot_P-littoralis_Contig87.52.1,p…	NA	prot_S-promiscuus_M_contig105.1322.1,prot_S-promiscuus_M_contig105.1325.1,prot_S-promiscuus_M_contig13.2299.1,prot_S-promiscuus_M_contig16.3662.1,prot_S-promiscuus_M_contig16.3732.1,prot_S-promiscuus_M_contig18.4271.1,prot_S-promiscuus_M_contig24.6928.1,prot_S-promiscuus_M_contig25.7230.1,prot_S-promiscuus_M_contig25.7241.1,prot_S-promiscuus_M_contig34.10774.1,prot_S-promiscuus_M_contig34.10775.1…	NA	NA	NA
OG0000210	FALSE	prot_D-dichotoma_M_contig264.9090.1,prot_D-dichotoma_M_contig264.9093.1,prot_D-dichotoma_M_contig327.11239.1	Ec-05_001620.1,Ec-17_000970.1,Ec-17_000990.1,Ec-17_001000.1,Ec-17_001010.1,Ec-17_001030.1,Ec-17_002600.1	prot_M-pyrifera_M_contig40362.11748.1,prot_M-pyrifera_M_contig52564.13668.1	prot_M-clavaeformis_F_contig1045.474.1,prot_M-clavaeformis_F_contig1771.5221.1,prot_M-clavaeformis_F_contig29.9480.1,prot_M-clavaeformis_F_contig3365.10828.1	prot_P-littoralis_Contig105.13.2,prot_P-littoralis_Contig105.16.1,prot_P-littoralis_Contig105.20.1,prot_P-littoralis_Contig1094.14.4,prot_P-littoralis_Contig199.43.5,prot_P-littoralis_Contig793.13.4	prot_S-polyschides_M_contig4803.13718.1,prot_S-polyschides_M_contig8334.18058.1,prot_S-polyschides_M_contig8708.18459.1	prot_S-promiscuus_M_contig20.5764.1,prot_S-promiscuus_M_contig6.16375.1,prot_S-promiscuus_M_contig6.16376.1,prot_S-promiscuus_M_contig7.17548.1,prot_S-promiscuus_M_contig7.17549.1	SJ13087,SJ17719,SJ17720,SJ18352,SJ20058	prot_S-latissima_F_contig1573.3949.1,prot_S-latissima_F_contig336.10040.1	prot_S-rigidula_F_contig11838.1.8,prot_S-rigidula_F_contig16373.1.1,prot_S-rigidula_F_contig34.1.1,prot_S-rigidula_F_contig685.1.1
OG0000211	FALSE	prot_D-dichotoma_M_contig896.19719.1	Ec-14_000820.1,Ec-14_003650.1	prot_M-pyrifera_M_contig111050.2311.1,prot_M-pyrifera_M_contig20579.7932.1,prot_M-pyrifera_M_contig23705.8640.1,prot_M-pyrifera_M_contig23705.8641.1,prot_M-pyrifera_M_contig43927.12288.1,prot_M-pyrifera_M_contig52474.13641.1,prot_M-pyrifera_M_contig57423.14524.1,prot_M-pyrifera_M_contig61321.15155.1,prot_M-pyrifera_M_contig64185.15691.1,prot_M-pyrifera_M_contig70997.16944.1,prot_M-pyrifera_M_cont…	prot_M-clavaeformis_F_contig1084.835.1,prot_M-clavaeformis_F_contig1213.1861.1,prot_M-clavaeformis_F_contig1320.2588.1,prot_M-clavaeformis_F_contig1320.2589.1,prot_M-clavaeformis_F_contig2578.8417.1,prot_M-clavaeformis_F_contig2578.8418.1,prot_M-clavaeformis_F_contig2578.8419.1,prot_M-clavaeformis_F_contig2578.8420.1,prot_M-clavaeformis_F_contig2578.8421.1,prot_M-clavaeformis_F_contig527.15130.1,…	prot_P-littoralis_Contig28.104.7,prot_P-littoralis_Contig603.16.2	prot_S-polyschides_M_contig1084.757.1,prot_S-polyschides_M_contig1351.3044.1,prot_S-polyschides_M_contig6950.16599.1	prot_S-promiscuus_M_contig4.12389.1,prot_S-promiscuus_M_contig4.12647.1	SJ07172,SJ20197,SJ20198	prot_S-latissima_F_contig125.1903.1,prot_S-latissima_F_contig125.1904.1,prot_S-latissima_F_contig1257.1949.1,prot_S-latissima_F_contig1257.1951.1,prot_S-latissima_F_contig1257.1952.1	prot_S-rigidula_F_contig11522.1.1
OG0000212	FALSE	prot_D-dichotoma_M_contig1066.609.1,prot_D-dichotoma_M_contig1472.3408.1,prot_D-dichotoma_M_contig1699.4753.1,prot_D-dichotoma_M_contig1699.4755.1,prot_D-dichotoma_M_contig1915.5851.1	Ec-13_001210.1,Ec-13_001370.1,Ec-13_001380.1,Ec-13_001680.1,Ec-17_002860.1,Ec-17_002930.1,Ec-17_002940.1	prot_M-pyrifera_M_contig2600.9141.1,prot_M-pyrifera_M_contig73961.17519.1	prot_M-clavaeformis_F_contig4001.12474.1,prot_M-clavaeformis_F_contig4972.14541.1,prot_M-clavaeformis_F_contig7258.18273.1	prot_P-littoralis_Contig1057.1.4,prot_P-littoralis_Contig1352.1.6,prot_P-littoralis_Contig1408.2.5,prot_P-littoralis_Contig4.362.1,prot_P-littoralis_Contig728.24.1,prot_P-littoralis_Contig891.3.1,prot_P-littoralis_Contig891.7.1	prot_S-polyschides_M_contig5221.14314.1,prot_S-polyschides_M_contig5967.15348.1,prot_S-polyschides_M_contig8117.17834.1	prot_S-promiscuus_M_contig1.84.1,prot_S-promiscuus_M_contig1.86.1,prot_S-promiscuus_M_contig1.87.1,prot_S-promiscuus_M_contig1.88.1,prot_S-promiscuus_M_contig1.99.1,prot_S-promiscuus_M_contig7.17517.1	SJ01091,SJ21494	prot_S-latissima_F_contig1078.653.1,prot_S-latissima_F_contig573.13506.1,prot_S-latissima_F_contig573.13507.1	prot_S-rigidula_F_contig10989.1.2,prot_S-rigidula_F_contig3138.1.1,prot_S-rigidula_F_contig8527.1.1
OG0000213	FALSE	prot_D-dichotoma_M_contig1443.3251.1,prot_D-dichotoma_M_contig4100.13431.1,prot_D-dichotoma_M_contig510.15497.1	Ec-01_003210.1,Ec-20_003790.1,Ec-26_000920.1	prot_M-pyrifera_M_contig100198.39.1,prot_M-pyrifera_M_contig112094.2539.1,prot_M-pyrifera_M_contig119858.4094.1,prot_M-pyrifera_M_contig125729.5198.1,prot_M-pyrifera_M_contig127171.5479.1,prot_M-pyrifera_M_contig22012.8267.1,prot_M-pyrifera_M_contig348.10827.1,prot_M-pyrifera_M_contig47462.12817.1,prot_M-pyrifera_M_contig59922.14912.1,prot_M-pyrifera_M_contig61231.15133.1,prot_M-pyrifera_M_contig…	prot_M-clavaeformis_F_contig361.11459.1,prot_M-clavaeformis_F_contig3711.11753.1	prot_P-littoralis_Contig594.6.1,prot_P-littoralis_Contig598.23.2,prot_P-littoralis_Contig623.53.1	prot_S-polyschides_M_contig108144.733.1,prot_S-polyschides_M_contig1328.2892.1,prot_S-polyschides_M_contig28600.9648.1,prot_S-polyschides_M_contig549.14674.1	prot_S-promiscuus_M_contig16.3464.1,prot_S-promiscuus_M_contig2.4759.1,prot_S-promiscuus_M_contig45.13699.1	SJ00435,SJ05897,SJ11330,SJ11331	prot_S-latissima_F_contig1158.1272.1,prot_S-latissima_F_contig1707.4655.1,prot_S-latissima_F_contig288.8940.1	prot_S-rigidula_F_contig11512.2.1,prot_S-rigidula_F_contig20861.1.1,prot_S-rigidula_F_contig3837.1.1
OG0000214	FALSE	prot_D-dichotoma_M_contig2028.6449.1,prot_D-dichotoma_M_contig48.14872.1,prot_D-dichotoma_M_contig772.18580.1	Ec-10_005020.1,Ec-16_001480.1	prot_M-pyrifera_M_contig47151.12775.1,prot_M-pyrifera_M_contig81198.18994.1,prot_M-pyrifera_M_contig891.20656.1,prot_M-pyrifera_M_contig937.21642.1	prot_M-clavaeformis_F_contig2527.8248.1,prot_M-clavaeformis_F_contig36.11430.1,prot_M-clavaeformis_F_contig89.20185.1	prot_P-littoralis_Contig115.121.1,prot_P-littoralis_Contig115.122.1,prot_P-littoralis_Contig449.25.1	prot_S-polyschides_M_contig2220.7504.1,prot_S-polyschides_M_contig2220.7505.1,prot_S-polyschides_M_contig616.15592.1,prot_S-polyschides_M_contig616.15593.1	prot_S-promiscuus_M_contig33.10499.1,prot_S-promiscuus_M_contig9.19001.1	SJ12469,SJ12470,SJ12471,SJ12967,SJ12968	prot_S-latissima_F_contig778.15620.1,prot_S-latissima_F_contig778.15621.1,prot_S-latissima_F_contig963.17400.1	prot_S-rigidula_F_contig11659.1.1,prot_S-rigidula_F_contig13247.1.1,prot_S-rigidula_F_contig13247.2.1,prot_S-rigidula_F_contig13377.2.1,prot_S-rigidula_F_contig1579.1.1,prot_S-rigidula_F_contig16901.2.1,prot_S-rigidula_F_contig16965.3.1,prot_S-rigidula_F_contig17894.1.1,prot_S-rigidula_F_contig24761.2.1,prot_S-rigidula_F_contig3350.2.1,prot_S-rigidula_F_contig3965.1.1,prot_S-rigidula_F_contig5930…
OG0000215	FALSE	prot_D-dichotoma_M_contig495.15172.1	Ec-05_000160.1,Ec-05_000320.1,Ec-13_004160.1,Ec-21_002000.1,Ec-21_002230.1	prot_M-pyrifera_M_contig13330.5918.1,prot_M-pyrifera_M_contig47841.12883.1	prot_M-clavaeformis_F_contig7585.18709.1	NA	prot_S-polyschides_M_contig11511.1411.1,prot_S-polyschides_M_contig137687.3242.1,prot_S-polyschides_M_contig16179.4704.1,prot_S-polyschides_M_contig30273.10088.1,prot_S-polyschides_M_contig34151.11086.1,prot_S-polyschides_M_contig54161.14569.1,prot_S-polyschides_M_contig636.15864.1	prot_S-promiscuus_M_contig47.13980.1,prot_S-promiscuus_M_contig92.19146.1	SJ00550,SJ01824,SJ07144,SJ08383,SJ09633,SJ11681,SJ14888,SJ17728,SJ18525,SJ21067,SJ22140	prot_S-latissima_F_contig632.14144.1,prot_S-latissima_F_contig8.15871.1	prot_S-rigidula_F_contig1049.3.1,prot_S-rigidula_F_contig12979.1.1,prot_S-rigidula_F_contig14739.1.1,prot_S-rigidula_F_contig15989.1.1,prot_S-rigidula_F_contig17107.2.1,prot_S-rigidula_F_contig19286.3.1,prot_S-rigidula_F_contig24138.1.1,prot_S-rigidula_F_contig25773.1.1,prot_S-rigidula_F_contig7725.1.1,prot_S-rigidula_F_contig795.1.1
OG0000216	FALSE	prot_D-dichotoma_M_contig1885.5684.1,prot_D-dichotoma_M_contig2989.10312.1,prot_D-dichotoma_M_contig805.18902.1,prot_D-dichotoma_M_contig805.18903.1,prot_D-dichotoma_M_contig805.18904.1,prot_D-dichotoma_M_contig805.18905.1,prot_D-dichotoma_M_contig805.18906.1,prot_D-dichotoma_M_contig805.18907.1,prot_D-dichotoma_M_contig805.18908.1,prot_D-dichotoma_M_contig805.18909.1	Ec-05_003690.1,Ec-05_003710.1,Ec-05_003870.1,Ec-17_002540.1	prot_M-pyrifera_M_contig555.14154.1	prot_M-clavaeformis_F_contig1060.617.1,prot_M-clavaeformis_F_contig10815.817.1	prot_P-littoralis_Contig10.66.1,prot_P-littoralis_Contig10.69.1,prot_P-littoralis_Contig14.73.2,prot_P-littoralis_Contig14.74.1,prot_P-littoralis_Contig14.94.10,prot_P-littoralis_Contig14.94.3,prot_P-littoralis_Contig14.94.4,prot_P-littoralis_Contig14.94.7,prot_P-littoralis_Contig374.51.2,prot_P-littoralis_Contig588.43.4	prot_S-polyschides_M_contig102492.231.1,prot_S-polyschides_M_contig5478.14652.1	prot_S-promiscuus_M_contig3.8811.1,prot_S-promiscuus_M_contig41.13083.1,prot_S-promiscuus_M_contig41.13085.1,prot_S-promiscuus_M_contig41.13086.1,prot_S-promiscuus_M_contig41.13093.1,prot_S-promiscuus_M_contig41.13094.1,prot_S-promiscuus_M_contig41.13095.1	SJ01509,SJ01510,SJ02920	prot_S-latissima_F_contig1723.4731.1	prot_S-rigidula_F_contig14893.2.1
OG0000217	FALSE	NA	NA	prot_M-pyrifera_M_contig19791.7745.1,prot_M-pyrifera_M_contig2536.9006.1	NA	prot_P-littoralis_Contig188.1.1,prot_P-littoralis_Contig343.8.1,prot_P-littoralis_Contig381.68.1	prot_S-polyschides_M_contig10250.232.1,prot_S-polyschides_M_contig1176.1641.1,prot_S-polyschides_M_contig13061.2751.1,prot_S-polyschides_M_contig432.12911.1	NA	SJ01945,SJ04259,SJ05436,SJ05757,SJ08148,SJ08149,SJ08150,SJ08151,SJ10513,SJ10514,SJ10515,SJ10519,SJ17657,SJ18107,SJ18108,SJ18109,SJ18111,SJ18112,SJ18114,SJ18115,SJ18993,SJ18994,SJ18995,SJ20420,SJ20956	prot_S-latissima_F_contig3308.9951.1,prot_S-latissima_F_contig765.15507.1,prot_S-latissima_F_contig765.15508.1,prot_S-latissima_F_contig86.16467.1,prot_S-latissima_F_contig86.16468.1,prot_S-latissima_F_contig885.16695.1,prot_S-latissima_F_contig885.16696.1	NA
OG0000218	FALSE	NA	Ec-02_003160.1,Ec-03_004940.1,Ec-04_004550.1,Ec-19_001520.1	prot_M-pyrifera_M_contig17145.7035.1	prot_M-clavaeformis_F_contig1111.1063.1,prot_M-clavaeformis_F_contig1530.3913.1,prot_M-clavaeformis_F_contig4464.13493.1,prot_M-clavaeformis_F_contig567.15793.1,prot_M-clavaeformis_F_contig828.19521.1	prot_P-littoralis_Contig152.108.2,prot_P-littoralis_Contig172.41.4,prot_P-littoralis_Contig514.5.2,prot_P-littoralis_Contig61.82.1,prot_P-littoralis_Contig676.21.2,prot_P-littoralis_Contig747.1.2,prot_P-littoralis_Contig81.110.3,prot_P-littoralis_Contig83.46.3,prot_P-littoralis_Contig947.7.1	prot_S-polyschides_M_contig5766.15080.1,prot_S-polyschides_M_contig5766.15081.1	prot_S-promiscuus_M_contig17.3825.1,prot_S-promiscuus_M_contig3.8980.1,prot_S-promiscuus_M_contig4.11979.1,prot_S-promiscuus_M_contig6.16163.1	SJ00563,SJ00567,SJ00569,SJ00570,SJ04037,SJ04038,SJ04039,SJ04040,SJ04806,SJ07584,SJ07706,SJ07808	prot_S-latissima_F_contig1161.1293.1,prot_S-latissima_F_contig158.3983.1,prot_S-latissima_F_contig158.3986.1	prot_S-rigidula_F_contig655.1.1
OG0000219	FALSE	NA	NA	NA	NA	NA	NA	NA	SJ00131,SJ02101,SJ02486,SJ03506,SJ04676,SJ04942,SJ05401,SJ05756,SJ06083,SJ07035,SJ07693,SJ07967,SJ08013,SJ08155,SJ09171,SJ09269,SJ09539,SJ09861,SJ11090,SJ11141,SJ11182,SJ11395,SJ11468,SJ12169,SJ13044,SJ13064,SJ13344,SJ13734,SJ14015,SJ14601,SJ15057,SJ15170,SJ15743,SJ16085,SJ17210,SJ17573,SJ18343,SJ20704,SJ22231,SJ22551	prot_S-latissima_F_contig2861.8909.1	NA
OG0000220	FALSE	prot_D-dichotoma_M_contig1757.5069.1,prot_D-dichotoma_M_contig294.10160.1,prot_D-dichotoma_M_contig375.12514.1	Ec-02_003490.1,Ec-02_003880.1,Ec-20_000740.1,Ec-20_000900.1,Ec-20_002590.1	prot_M-pyrifera_M_contig1517.6477.1	prot_M-clavaeformis_F_contig1582.4222.1,prot_M-clavaeformis_F_contig2127.6779.1,prot_M-clavaeformis_F_contig221.7099.1,prot_M-clavaeformis_F_contig2300.7419.1,prot_M-clavaeformis_F_contig616.16616.1	prot_P-littoralis_Contig309.75.3,prot_P-littoralis_Contig46.99.1,prot_P-littoralis_Contig615.22.37	prot_S-polyschides_M_contig196.6344.1,prot_S-polyschides_M_contig196.6345.1,prot_S-polyschides_M_contig30261.10084.1,prot_S-polyschides_M_contig4597.13381.1,prot_S-polyschides_M_contig4597.13382.1,prot_S-polyschides_M_contig5323.14442.1,prot_S-polyschides_M_contig7012.16668.1,prot_S-polyschides_M_contig7739.17440.1	prot_S-promiscuus_M_contig8.18112.1,prot_S-promiscuus_M_contig8.18131.1,prot_S-promiscuus_M_contig8.18198.1,prot_S-promiscuus_M_contig8.18247.1,prot_S-promiscuus_M_contig8.18414.1	SJ09723,SJ14535,SJ14536,SJ18423	prot_S-latissima_F_contig11.811.1,prot_S-latissima_F_contig1603.4153.1,prot_S-latissima_F_contig804.15909.1,prot_S-latissima_F_contig9.16778.1	prot_S-rigidula_F_contig2058.1.1,prot_S-rigidula_F_contig8758.1.1
OG0000221	FALSE	prot_D-dichotoma_M_contig1256.1998.1,prot_D-dichotoma_M_contig1286.2182.1,prot_D-dichotoma_M_contig1357.2681.1,prot_D-dichotoma_M_contig1538.3799.1,prot_D-dichotoma_M_contig377.12557.1	Ec-08_001720.1,Ec-24_004130.1,Ec-24_004140.1,Ec-24_004170.1,Ec-27_005230.1	prot_M-pyrifera_M_contig26613.9263.1,prot_M-pyrifera_M_contig2968.9877.1	prot_M-clavaeformis_F_contig1664.4665.1,prot_M-clavaeformis_F_contig373.11794.1,prot_M-clavaeformis_F_contig373.11795.1,prot_M-clavaeformis_F_contig54.15365.1,prot_M-clavaeformis_F_contig639.16969.1	prot_P-littoralis_Contig37.104.7,prot_P-littoralis_Contig37.105.3,prot_P-littoralis_Contig414.72.15,prot_P-littoralis_Contig8.24.9	prot_S-polyschides_M_contig1149.1379.1,prot_S-polyschides_M_contig9139.18946.1,prot_S-polyschides_M_contig9621.19411.1	prot_S-promiscuus_M_contig13.2426.1,prot_S-promiscuus_M_contig22.6475.1,prot_S-promiscuus_M_contig55.15552.1,prot_S-promiscuus_M_contig71.17633.1,prot_S-promiscuus_M_contig71.17635.1	SJ14054,SJ14254,SJ17871,SJ20269,SJ20270	prot_S-latissima_F_contig194.5655.1,prot_S-latissima_F_contig97.17453.1,prot_S-latissima_F_contig970.17470.1	prot_S-rigidula_F_contig12944.1.1,prot_S-rigidula_F_contig15314.2.1,prot_S-rigidula_F_contig15363.1.1
OG0000222	FALSE	prot_D-dichotoma_M_contig198.6142.1,prot_D-dichotoma_M_contig2646.9104.1,prot_D-dichotoma_M_contig454.14381.1,prot_D-dichotoma_M_contig454.14382.1,prot_D-dichotoma_M_contig454.14383.1,prot_D-dichotoma_M_contig454.14384.1	Ec-01_006440.1,Ec-01_007420.1,Ec-21_006140.1	prot_M-pyrifera_M_contig112395.2587.1,prot_M-pyrifera_M_contig17022.6996.1,prot_M-pyrifera_M_contig23807.8661.1,prot_M-pyrifera_M_contig92706.21446.1	prot_M-clavaeformis_F_contig1236.2011.1,prot_M-clavaeformis_F_contig1614.4408.1,prot_M-clavaeformis_F_contig955.20867.1	prot_P-littoralis_Contig10.131.1,prot_P-littoralis_Contig10.133.1,prot_P-littoralis_Contig1002.16.2,prot_P-littoralis_Contig75.127.2	prot_S-polyschides_M_contig11817.1693.1,prot_S-polyschides_M_contig2321.7882.1,prot_S-polyschides_M_contig2321.7883.1,prot_S-polyschides_M_contig2321.7884.1,prot_S-polyschides_M_contig23756.8092.1,prot_S-polyschides_M_contig30546.10155.1	prot_S-promiscuus_M_contig19.4658.1,prot_S-promiscuus_M_contig2.5110.1,prot_S-promiscuus_M_contig2.5207.1	SJ06271,SJ08610,SJ08611,SJ12517,SJ12520	prot_S-latissima_F_contig261.8181.1,prot_S-latissima_F_contig522.12954.1,prot_S-latissima_F_contig631.14123.1,prot_S-latissima_F_contig631.14124.1,prot_S-latissima_F_contig631.14125.1	prot_S-rigidula_F_contig479.1.1
OG0000223	FALSE	prot_D-dichotoma_M_contig162.4340.1,prot_D-dichotoma_M_contig188.5648.1,prot_D-dichotoma_M_contig2281.7672.1,prot_D-dichotoma_M_contig2281.7673.1,prot_D-dichotoma_M_contig298.10294.1	Ec-17_003200.1,Ec-17_003340.1,Ec-17_003870.1,Ec-26_005310.1	prot_M-pyrifera_M_contig3815.11398.1,prot_M-pyrifera_M_contig3815.11400.1,prot_M-pyrifera_M_contig65368.15901.1,prot_M-pyrifera_M_contig7720.18196.1	prot_M-clavaeformis_F_contig12250.1950.1,prot_M-clavaeformis_F_contig2251.7242.1,prot_M-clavaeformis_F_contig5243.15086.1	prot_P-littoralis_Contig273.94.3,prot_P-littoralis_Contig289.21.2,prot_P-littoralis_Contig289.25.3,prot_P-littoralis_Contig289.26.3,prot_P-littoralis_Contig289.47.3,prot_P-littoralis_Contig423.17.1,prot_P-littoralis_Contig423.18.6,prot_P-littoralis_Contig423.19.1,prot_P-littoralis_Contig9.5.1,prot_P-littoralis_Contig9.7.5	prot_S-polyschides_M_contig19843.6452.1,prot_S-polyschides_M_contig31276.10338.1,prot_S-polyschides_M_contig3790.11890.1,prot_S-polyschides_M_contig3790.11891.1	prot_S-promiscuus_M_contig6.16580.1,prot_S-promiscuus_M_contig6.16587.1	SJ03579,SJ09756,SJ09757	prot_S-latissima_F_contig1454.3322.1,prot_S-latissima_F_contig1454.3324.1,prot_S-latissima_F_contig1454.3325.1	prot_S-rigidula_F_contig1016.2.1,prot_S-rigidula_F_contig16445.1.1
OG0000224	FALSE	prot_D-dichotoma_M_contig1667.4601.1,prot_D-dichotoma_M_contig2966.10243.1,prot_D-dichotoma_M_contig2966.10244.1	Ec-03_000010.1,Ec-03_000020.1,Ec-20_003620.1,Ec-20_003630.1	prot_M-pyrifera_M_contig19748.7735.1,prot_M-pyrifera_M_contig923.21360.1	prot_M-clavaeformis_F_contig2548.8321.1,prot_M-clavaeformis_F_contig4215.12968.1,prot_M-clavaeformis_F_contig613.16579.1	prot_P-littoralis_Contig181.32.3,prot_P-littoralis_Contig181.33.10,prot_P-littoralis_Contig565.8.5	prot_S-polyschides_M_contig26269.8940.1,prot_S-polyschides_M_contig5405.14552.1,prot_S-polyschides_M_contig6527.16067.1	prot_S-promiscuus_M_contig10.848.1,prot_S-promiscuus_M_contig10.850.1,prot_S-promiscuus_M_contig10.851.1,prot_S-promiscuus_M_contig45.13717.1	SJ03316,SJ05858,SJ05859,SJ08276,SJ08291,SJ12567,SJ16632,SJ16633,SJ16634,SJ21859,SJ21862,SJ21863	prot_S-latissima_F_contig127.2047.1,prot_S-latissima_F_contig1300.2292.1,prot_S-latissima_F_contig2807.8739.1,prot_S-latissima_F_contig388.10895.1,prot_S-latissima_F_contig388.10896.1	prot_S-rigidula_F_contig21120.1.1
OG0000225	FALSE	prot_D-dichotoma_M_contig441.14102.1	NA	prot_M-pyrifera_M_contig32911.10507.1,prot_M-pyrifera_M_contig66350.16100.1	NA	NA	prot_S-polyschides_M_contig14192.3533.1,prot_S-polyschides_M_contig21314.7077.1,prot_S-polyschides_M_contig36730.11639.1,prot_S-polyschides_M_contig629.15789.1	prot_S-promiscuus_M_contig50.15080.1,prot_S-promiscuus_M_contig53.15452.1,prot_S-promiscuus_M_contig59.15898.1,prot_S-promiscuus_M_contig7.17057.1	SJ00558,SJ02085,SJ02594,SJ03849,SJ06863,SJ07371,SJ09299,SJ10164,SJ11400,SJ16256	prot_S-latissima_F_contig137.2735.1,prot_S-latissima_F_contig24.7531.1	prot_S-rigidula_F_contig10852.1.1,prot_S-rigidula_F_contig11021.1.1,prot_S-rigidula_F_contig12187.1.1,prot_S-rigidula_F_contig12215.1.1,prot_S-rigidula_F_contig12986.2.1,prot_S-rigidula_F_contig14332.1.1,prot_S-rigidula_F_contig14413.1.1,prot_S-rigidula_F_contig22277.1.1,prot_S-rigidula_F_contig23166.1.1,prot_S-rigidula_F_contig23676.1.1,prot_S-rigidula_F_contig24495.1.1,prot_S-rigidula_F_contig2…
OG0000226	FALSE	NA	Ec-05_006000.1,Ec-05_006030.1,Ec-11_002750.1,Ec-11_004650.1,Ec-11_004680.1,Ec-11_004690.1,Ec-13_004850.1	prot_M-pyrifera_M_contig12514.5093.1,prot_M-pyrifera_M_contig7516.17752.1	prot_M-clavaeformis_F_contig173.5027.1,prot_M-clavaeformis_F_contig1865.5648.1,prot_M-clavaeformis_F_contig2771.9089.1,prot_M-clavaeformis_F_contig605.16462.1,prot_M-clavaeformis_F_contig769.18841.1	prot_P-littoralis_Contig306.46.1,prot_P-littoralis_Contig472.38.1,prot_P-littoralis_Contig673.4.14	prot_S-polyschides_M_contig1938.6243.1	prot_S-promiscuus_M_contig10.1052.1,prot_S-promiscuus_M_contig12.2109.1,prot_S-promiscuus_M_contig12.2110.1,prot_S-promiscuus_M_contig46.13777.1,prot_S-promiscuus_M_contig46.13779.1,prot_S-promiscuus_M_contig46.13793.1,prot_S-promiscuus_M_contig46.13802.1,prot_S-promiscuus_M_contig46.13803.1	SJ00757,SJ03478,SJ07082,SJ07314,SJ13541,SJ14810	prot_S-latissima_F_contig131.2357.1,prot_S-latissima_F_contig131.2358.1,prot_S-latissima_F_contig2152.6577.1,prot_S-latissima_F_contig3009.9276.1,prot_S-latissima_F_contig3049.9387.1,prot_S-latissima_F_contig870.16611.1	prot_S-rigidula_F_contig19479.1.1,prot_S-rigidula_F_contig19479.2.1
OG0000227	FALSE	prot_D-dichotoma_M_contig1467.3385.1,prot_D-dichotoma_M_contig2092.6806.1,prot_D-dichotoma_M_contig2101.6876.1	NA	NA	NA	prot_P-littoralis_Contig1005.14.1,prot_P-littoralis_Contig1006.13.1,prot_P-littoralis_Contig105.7.1,prot_P-littoralis_Contig1194.5.1,prot_P-littoralis_Contig1208.7.1,prot_P-littoralis_Contig1360.2.1,prot_P-littoralis_Contig14.46.1,prot_P-littoralis_Contig164.94.1,prot_P-littoralis_Contig269.4.2,prot_P-littoralis_Contig3.288.1,prot_P-littoralis_Contig320.36.1,prot_P-littoralis_Contig357.54.1,prot_…	NA	prot_S-promiscuus_M_contig12.1873.1,prot_S-promiscuus_M_contig17.4042.1,prot_S-promiscuus_M_contig44.13558.1	NA	prot_S-latissima_F_contig482.12319.1,prot_S-latissima_F_contig998.17663.1	prot_S-rigidula_F_contig14730.1.1,prot_S-rigidula_F_contig1949.1.1,prot_S-rigidula_F_contig5396.4.1
OG0000228	FALSE	prot_D-dichotoma_M_contig1121.1041.1,prot_D-dichotoma_M_contig1121.1042.1,prot_D-dichotoma_M_contig1134.1134.1,prot_D-dichotoma_M_contig1134.1135.1,prot_D-dichotoma_M_contig1208.1683.1,prot_D-dichotoma_M_contig1641.4461.1,prot_D-dichotoma_M_contig1641.4463.1,prot_D-dichotoma_M_contig1649.4490.1,prot_D-dichotoma_M_contig1867.5592.1,prot_D-dichotoma_M_contig1867.5595.1,prot_D-dichotoma_M_contig1898…	NA	NA	NA	NA	NA	NA	NA	prot_S-latissima_F_contig299.9181.1	NA
OG0000229	FALSE	prot_D-dichotoma_M_contig1304.2359.1,prot_D-dichotoma_M_contig1542.3829.1,prot_D-dichotoma_M_contig1766.5100.1,prot_D-dichotoma_M_contig1919.5862.1,prot_D-dichotoma_M_contig2108.6894.1,prot_D-dichotoma_M_contig2262.7586.1,prot_D-dichotoma_M_contig2386.8132.1,prot_D-dichotoma_M_contig2406.8229.1,prot_D-dichotoma_M_contig242.8281.1,prot_D-dichotoma_M_contig2474.8493.1,prot_D-dichotoma_M_contig2567.…	NA	NA	NA	prot_P-littoralis_Contig108.38.1,prot_P-littoralis_Contig13.141.1,prot_P-littoralis_Contig252.4.1	prot_S-polyschides_M_contig28741.9683.1	NA	SJ08456,SJ10702	NA	NA
OG0000230	FALSE	prot_D-dichotoma_M_contig1375.2770.1,prot_D-dichotoma_M_contig1698.4751.1,prot_D-dichotoma_M_contig2181.7246.1,prot_D-dichotoma_M_contig271.9361.1	Ec-05_003980.1,Ec-05_004620.1,Ec-17_000020.1,Ec-17_002220.1,Ec-26_001160.1,Ec-26_003450.1	prot_M-pyrifera_M_contig10448.966.1,prot_M-pyrifera_M_contig44762.12411.1	prot_M-clavaeformis_F_contig1311.2533.1,prot_M-clavaeformis_F_contig1490.3658.1,prot_M-clavaeformis_F_contig156.4076.1,prot_M-clavaeformis_F_contig726.18276.1,prot_M-clavaeformis_F_contig746.18548.1	prot_P-littoralis_Contig106.33.1,prot_P-littoralis_Contig427.49.1,prot_P-littoralis_Contig967.8.3	prot_S-polyschides_M_contig22290.7538.1,prot_S-polyschides_M_contig3835.11996.1,prot_S-polyschides_M_contig3835.11997.1	prot_S-promiscuus_M_contig16.3513.1,prot_S-promiscuus_M_contig27.7910.1,prot_S-promiscuus_M_contig3.9297.1,prot_S-promiscuus_M_contig41.13010.1,prot_S-promiscuus_M_contig41.13072.1,prot_S-promiscuus_M_contig6.16299.1,prot_S-promiscuus_M_contig6.16300.1	SJ05310,SJ19525,SJ20666	prot_S-latissima_F_contig1129.1064.1,prot_S-latissima_F_contig1416.3038.1,prot_S-latissima_F_contig1416.3039.1,prot_S-latissima_F_contig1416.3040.1,prot_S-latissima_F_contig423.11496.1,prot_S-latissima_F_contig704.14895.1	NA
OG0000231	FALSE	prot_D-dichotoma_M_contig125.1952.1,prot_D-dichotoma_M_contig143.3150.1,prot_D-dichotoma_M_contig1499.3565.1,prot_D-dichotoma_M_contig2281.7674.1,prot_D-dichotoma_M_contig2408.8246.1,prot_D-dichotoma_M_contig2453.8412.1,prot_D-dichotoma_M_contig319.10998.1,prot_D-dichotoma_M_contig4337.13957.1,prot_D-dichotoma_M_contig4589.14468.1,prot_D-dichotoma_M_contig4667.14611.1	NA	NA	prot_M-clavaeformis_F_contig14926.3670.1,prot_M-clavaeformis_F_contig6741.17487.1	prot_P-littoralis_Contig160.87.1,prot_P-littoralis_Contig243.91.1	prot_S-polyschides_M_contig2358.8022.1,prot_S-polyschides_M_contig62184.15677.1,prot_S-polyschides_M_contig7608.17324.1,prot_S-polyschides_M_contig76623.17386.1	NA	SJ03465,SJ04624,SJ04811,SJ05376,SJ06494,SJ06906,SJ07469,SJ07769,SJ09800,SJ12200,SJ12437,SJ16793,SJ16886,SJ17299,SJ18197,SJ19304,SJ20778,SJ20871,SJ21279,SJ21960	NA	prot_S-rigidula_F_contig14738.1.1
OG0000232	FALSE	prot_D-dichotoma_M_contig14.2962.1,prot_D-dichotoma_M_contig2472.8486.1,prot_D-dichotoma_M_contig2472.8487.1,prot_D-dichotoma_M_contig3194.11014.1,prot_D-dichotoma_M_contig3194.11015.1,prot_D-dichotoma_M_contig559.16304.1,prot_D-dichotoma_M_contig754.18390.1	Ec-27_005680.1	prot_M-pyrifera_M_contig15710.6641.1,prot_M-pyrifera_M_contig8443.19690.1	prot_M-clavaeformis_F_contig1612.4397.1,prot_M-clavaeformis_F_contig2262.7273.1	prot_P-littoralis_Contig1055.1.1,prot_P-littoralis_Contig1055.8.3,prot_P-littoralis_Contig210.41.2,prot_P-littoralis_Contig278.21.1,prot_P-littoralis_Contig278.8.3,prot_P-littoralis_Contig884.31.1	prot_S-polyschides_M_contig16699.4982.1,prot_S-polyschides_M_contig22265.7532.1,prot_S-polyschides_M_contig44272.13097.1	prot_S-promiscuus_M_contig13.2468.1,prot_S-promiscuus_M_contig13.2471.1,prot_S-promiscuus_M_contig13.2473.1,prot_S-promiscuus_M_contig34.10573.1	SJ07765,SJ13238,SJ13240,SJ18135,SJ18140,SJ18142	prot_S-latissima_F_contig1212.1656.1,prot_S-latissima_F_contig493.12454.1	prot_S-rigidula_F_contig13504.2.1,prot_S-rigidula_F_contig13640.1.2,prot_S-rigidula_F_contig1386.1.2,prot_S-rigidula_F_contig17128.1.1,prot_S-rigidula_F_contig2626.1.1,prot_S-rigidula_F_contig9659.1.1
OG0000233	FALSE	prot_D-dichotoma_M_contig1383.2832.1,prot_D-dichotoma_M_contig18.5251.1,prot_D-dichotoma_M_contig58.16612.1,prot_D-dichotoma_M_contig736.18210.1,prot_D-dichotoma_M_contig736.18211.1,prot_D-dichotoma_M_contig736.18212.1	Ec-01_004650.1,Ec-01_004660.1,Ec-03_001360.1,Ec-03_001370.1,Ec-26_002480.1	prot_M-pyrifera_M_contig13893.6098.1,prot_M-pyrifera_M_contig30253.10000.1,prot_M-pyrifera_M_contig47572.12839.1,prot_M-pyrifera_M_contig70684.16873.1	prot_M-clavaeformis_F_contig17114.4939.1,prot_M-clavaeformis_F_contig2829.9274.1,prot_M-clavaeformis_F_contig906.20380.1	prot_P-littoralis_Contig1003.6.1,prot_P-littoralis_Contig21.111.2,prot_P-littoralis_Contig700.11.1,prot_P-littoralis_Contig700.8.4	prot_S-polyschides_M_contig473.13618.1,prot_S-polyschides_M_contig846.18185.1	prot_S-promiscuus_M_contig2.4919.1,prot_S-promiscuus_M_contig2.4920.1,prot_S-promiscuus_M_contig31.10048.1,prot_S-promiscuus_M_contig31.10049.1	SJ04255,SJ07885,SJ07886,SJ17426,SJ17427	prot_S-latissima_F_contig562.13352.1,prot_S-latissima_F_contig78.15673.1,prot_S-latissima_F_contig832.16215.1,prot_S-latissima_F_contig832.16216.1	prot_S-rigidula_F_contig18434.1.1,prot_S-rigidula_F_contig19625.1.1
OG0000234	FALSE	prot_D-dichotoma_M_contig2209.7384.1,prot_D-dichotoma_M_contig854.19330.1,prot_D-dichotoma_M_contig854.19331.1	Ec-12_008240.1,Ec-15_002850.1,Ec-20_003430.1	prot_M-pyrifera_M_contig114030.2921.1,prot_M-pyrifera_M_contig114490.3017.1,prot_M-pyrifera_M_contig125046.5078.1,prot_M-pyrifera_M_contig48032.12909.1,prot_M-pyrifera_M_contig76020.17932.1,prot_M-pyrifera_M_contig87021.20234.1,prot_M-pyrifera_M_contig9674.22274.1	prot_M-clavaeformis_F_contig1260.2206.1,prot_M-clavaeformis_F_contig2712.8898.1,prot_M-clavaeformis_F_contig484.14265.1,prot_M-clavaeformis_F_contig866.19927.1	prot_P-littoralis_Contig213.69.2,prot_P-littoralis_Contig291.56.2,prot_P-littoralis_Contig395.39.1,prot_P-littoralis_Contig619.8.1	prot_S-polyschides_M_contig106888.609.1,prot_S-polyschides_M_contig10713.638.1,prot_S-polyschides_M_contig14436.3679.1,prot_S-polyschides_M_contig17610.5450.1,prot_S-polyschides_M_contig1907.6111.1,prot_S-polyschides_M_contig51868.14271.1	prot_S-promiscuus_M_contig11.1562.1,prot_S-promiscuus_M_contig42.13189.1,prot_S-promiscuus_M_contig8.18315.1	SJ01408,SJ06161,SJ13947	prot_S-latissima_F_contig1191.1501.1,prot_S-latissima_F_contig1191.1502.1,prot_S-latissima_F_contig957.17301.1	prot_S-rigidula_F_contig13489.1.1,prot_S-rigidula_F_contig14978.2.1,prot_S-rigidula_F_contig9845.2.1
OG0000235	FALSE	prot_D-dichotoma_M_contig1647.4480.1,prot_D-dichotoma_M_contig1647.4481.1,prot_D-dichotoma_M_contig3125.10810.1,prot_D-dichotoma_M_contig3125.10811.1,prot_D-dichotoma_M_contig3472.11783.1,prot_D-dichotoma_M_contig4082.13366.1	Ec-00_000750.1,Ec-00_011230.1,Ec-15_000280.1,Ec-15_000620.1,Ec-15_000630.1,Ec-18_002790.1	prot_M-pyrifera_M_contig60735.15044.1	prot_M-clavaeformis_F_contig1269.2257.1,prot_M-clavaeformis_F_contig1761.5181.1,prot_M-clavaeformis_F_contig2835.9293.1,prot_M-clavaeformis_F_contig3645.11550.1	prot_P-littoralis_Contig1.87.1,prot_P-littoralis_Contig1.88.1	prot_S-polyschides_M_contig2611.8892.1	prot_S-promiscuus_M_contig11.1755.1,prot_S-promiscuus_M_contig11.1756.1,prot_S-promiscuus_M_contig11.1767.1,prot_S-promiscuus_M_contig11.1768.1,prot_S-promiscuus_M_contig11.1796.1,prot_S-promiscuus_M_contig28.8301.1	SJ00464,SJ00465,SJ00466,SJ04428,SJ08479	prot_S-latissima_F_contig30.9254.1,prot_S-latissima_F_contig30.9256.1,prot_S-latissima_F_contig30.9258.1,prot_S-latissima_F_contig30.9259.1,prot_S-latissima_F_contig30.9260.1	prot_S-rigidula_F_contig23880.1.1,prot_S-rigidula_F_contig4532.1.2,prot_S-rigidula_F_contig8787.1.2
OG0000236	FALSE	prot_D-dichotoma_M_contig227.7625.1,prot_D-dichotoma_M_contig227.7627.1	Ec-09_000540.1,Ec-09_000560.1,Ec-09_000580.1,Ec-09_000600.1,Ec-23_002270.1	prot_M-pyrifera_M_contig1479.6370.1,prot_M-pyrifera_M_contig56137.14280.1	prot_M-clavaeformis_F_contig1075.743.1,prot_M-clavaeformis_F_contig1286.2361.1,prot_M-clavaeformis_F_contig184.5559.1,prot_M-clavaeformis_F_contig184.5561.1	prot_P-littoralis_Contig396.8.1,prot_P-littoralis_Contig486.38.1,prot_P-littoralis_Contig574.12.7,prot_P-littoralis_Contig574.20.2,prot_P-littoralis_Contig574.26.8,prot_P-littoralis_Contig860.23.2	prot_S-polyschides_M_contig10677.600.1,prot_S-polyschides_M_contig2278.7733.1,prot_S-polyschides_M_contig4888.13838.1,prot_S-polyschides_M_contig53946.14535.1,prot_S-polyschides_M_contig8644.18389.1	prot_S-promiscuus_M_contig15.3123.1,prot_S-promiscuus_M_contig15.3124.1,prot_S-promiscuus_M_contig25.7400.1,prot_S-promiscuus_M_contig25.7401.1,prot_S-promiscuus_M_contig53.15445.1,prot_S-promiscuus_M_contig53.15456.1	SJ09980,SJ12416,SJ12417	prot_S-latissima_F_contig332.9979.1,prot_S-latissima_F_contig332.9980.1,prot_S-latissima_F_contig332.9981.1,prot_S-latissima_F_contig332.9982.1,prot_S-latissima_F_contig428.11584.1	prot_S-rigidula_F_contig1415.1.1
OG0000237	FALSE	NA	Ec-00_005970.1,Ec-08_004975.1,Ec-09_002950.1,Ec-26_001610.1,Ec-26_003620.1	prot_M-pyrifera_M_contig12150.4424.1,prot_M-pyrifera_M_contig125.5073.1	prot_M-clavaeformis_F_contig10770.760.1,prot_M-clavaeformis_F_contig10891.864.1,prot_M-clavaeformis_F_contig14672.3510.1,prot_M-clavaeformis_F_contig8229.19478.1	prot_P-littoralis_Contig100.84.1,prot_P-littoralis_Contig1140.3.1,prot_P-littoralis_Contig1140.4.1,prot_P-littoralis_Contig1156.1.1,prot_P-littoralis_Contig119.101.1,prot_P-littoralis_Contig1334.5.1,prot_P-littoralis_Contig1537.5.1,prot_P-littoralis_Contig1537.6.1,prot_P-littoralis_Contig16.70.1,prot_P-littoralis_Contig212.3.1,prot_P-littoralis_Contig212.6.1,prot_P-littoralis_Contig271.73.1,prot_…	prot_S-polyschides_M_contig58722.15228.1	NA	SJ12849	prot_S-latissima_F_contig1142.1183.1,prot_S-latissima_F_contig2249.6923.1	NA
OG0000238	FALSE	prot_D-dichotoma_M_contig1190.1541.1,prot_D-dichotoma_M_contig2391.8155.1	Ec-11_002330.1,Ec-12_000565.1,Ec-19_001190.1,Ec-19_001200.1,Ec-19_001280.1	prot_M-pyrifera_M_contig113331.2784.1,prot_M-pyrifera_M_contig114921.3099.1,prot_M-pyrifera_M_contig16830.6943.1,prot_M-pyrifera_M_contig55353.14137.1,prot_M-pyrifera_M_contig7256.17245.1	prot_M-clavaeformis_F_contig14895.3645.1,prot_M-clavaeformis_F_contig3242.10499.1,prot_M-clavaeformis_F_contig6009.16391.1,prot_M-clavaeformis_F_contig8579.19844.1	prot_P-littoralis_Contig282.10.3,prot_P-littoralis_Contig387.12.1,prot_P-littoralis_Contig818.27.1	prot_S-polyschides_M_contig10996.891.1,prot_S-polyschides_M_contig12158.2036.1,prot_S-polyschides_M_contig36998.11686.1,prot_S-polyschides_M_contig47978.13707.1,prot_S-polyschides_M_contig55486.14767.1	prot_S-promiscuus_M_contig10.912.1,prot_S-promiscuus_M_contig18.4170.1,prot_S-promiscuus_M_contig18.4171.1,prot_S-promiscuus_M_contig18.4173.1,prot_S-promiscuus_M_contig18.4181.1,prot_S-promiscuus_M_contig18.4331.1,prot_S-promiscuus_M_contig41.12916.1	SJ01650,SJ15093,SJ15095	prot_S-latissima_F_contig1555.3849.1,prot_S-latissima_F_contig585.13609.1,prot_S-latissima_F_contig585.13610.1	prot_S-rigidula_F_contig4972.1.1
OG0000239	FALSE	prot_D-dichotoma_M_contig1701.4788.1,prot_D-dichotoma_M_contig3062.10606.1,prot_D-dichotoma_M_contig628.17183.1	Ec-00_005410.1,Ec-01_008810.1,Ec-06_007300.1,Ec-06_007310.1,Ec-06_007320.1,Ec-26_003630.1	prot_M-pyrifera_M_contig155.6582.1,prot_M-pyrifera_M_contig3674.11176.1	prot_M-clavaeformis_F_contig16.4309.1,prot_M-clavaeformis_F_contig3422.10994.1,prot_M-clavaeformis_F_contig5793.15999.1	prot_P-littoralis_Contig1178.3.6,prot_P-littoralis_Contig686.15.2,prot_P-littoralis_Contig76.50.5	prot_S-polyschides_M_contig4440.13115.1,prot_S-polyschides_M_contig5151.14219.1,prot_S-polyschides_M_contig6898.16520.1,prot_S-polyschides_M_contig7088.16751.1	prot_S-promiscuus_M_contig14.3091.1,prot_S-promiscuus_M_contig2.5347.1,prot_S-promiscuus_M_contig3.9050.1	SJ00192,SJ05841,SJ06276,SJ07550,SJ10094,SJ19194	prot_S-latissima_F_contig1711.4685.1,prot_S-latissima_F_contig1711.4686.1,prot_S-latissima_F_contig2419.7599.1,prot_S-latissima_F_contig29.8991.1,prot_S-latissima_F_contig501.12609.1,prot_S-latissima_F_contig532.13085.1,prot_S-latissima_F_contig653.14313.1	prot_S-rigidula_F_contig21876.1.1
OG0000240	FALSE	prot_D-dichotoma_M_contig4307.13897.1,prot_D-dichotoma_M_contig798.18804.1,prot_D-dichotoma_M_contig946.20183.1	Ec-12_000400.1,Ec-12_000460.1,Ec-12_000470.1,Ec-12_000480.1,Ec-12_000490.1	prot_M-pyrifera_M_contig4838.12972.1,prot_M-pyrifera_M_contig7019.16776.1	prot_M-clavaeformis_F_contig123.1984.1,prot_M-clavaeformis_F_contig6770.17523.1,prot_M-clavaeformis_F_contig8894.20182.1	prot_P-littoralis_Contig1284.7.3,prot_P-littoralis_Contig139.44.17,prot_P-littoralis_Contig201.2.18,prot_P-littoralis_Contig397.42.3	prot_S-polyschides_M_contig1649.4871.1,prot_S-polyschides_M_contig732.17019.1,prot_S-polyschides_M_contig732.17020.1,prot_S-polyschides_M_contig7986.17684.1,prot_S-polyschides_M_contig9079.18896.1	prot_S-promiscuus_M_contig5.14962.1,prot_S-promiscuus_M_contig5.14963.1,prot_S-promiscuus_M_contig5.14965.1	SJ00912,SJ00913,SJ00914,SJ00922,SJ02877,SJ02878	prot_S-latissima_F_contig1943.5663.1,prot_S-latissima_F_contig1943.5664.1,prot_S-latissima_F_contig2162.6611.1,prot_S-latissima_F_contig322.9767.1,prot_S-latissima_F_contig322.9768.1	prot_S-rigidula_F_contig605.1.1,prot_S-rigidula_F_contig605.3.1
OG0000241	FALSE	prot_D-dichotoma_M_contig3244.11189.1,prot_D-dichotoma_M_contig36.12109.1,prot_D-dichotoma_M_contig36.12111.1,prot_D-dichotoma_M_contig36.12113.1,prot_D-dichotoma_M_contig397.13042.1	Ec-00_000010.1,Ec-00_000900.1,Ec-00_003170.1,Ec-00_006340.1,Ec-00_009410.1,Ec-00_009420.1,Ec-00_011110.1,Ec-07_007480.1,Ec-18_002770.1	prot_M-pyrifera_M_contig14718.6348.1,prot_M-pyrifera_M_contig14876.6387.1,prot_M-pyrifera_M_contig16982.6985.1,prot_M-pyrifera_M_contig778.18304.1	prot_M-clavaeformis_F_contig16.4318.1,prot_M-clavaeformis_F_contig80.19234.1	prot_P-littoralis_Contig390.34.9	prot_S-polyschides_M_contig34020.11027.1,prot_S-polyschides_M_contig3709.11712.1	prot_S-promiscuus_M_contig26.7660.1,prot_S-promiscuus_M_contig26.7661.1,prot_S-promiscuus_M_contig3.9242.1	SJ02902,SJ07591,SJ21870,SJ22407,SJ22408,SJ22411,SJ22414	prot_S-latissima_F_contig1684.4505.1,prot_S-latissima_F_contig1988.5864.1,prot_S-latissima_F_contig257.8050.1	prot_S-rigidula_F_contig1055.1.8,prot_S-rigidula_F_contig402.1.5
OG0000242	FALSE	prot_D-dichotoma_M_contig1872.5627.1,prot_D-dichotoma_M_contig3014.10461.1,prot_D-dichotoma_M_contig987.20506.1	Ec-00_008990.1	prot_M-pyrifera_M_contig6279.15424.1	NA	prot_P-littoralis_Contig496.36.1,prot_P-littoralis_Contig496.37.3	prot_S-polyschides_M_contig9788.19566.1	NA	SJ01269,SJ01586,SJ02943,SJ02946,SJ03458,SJ05982,SJ08009,SJ10390,SJ10391,SJ13988,SJ13991,SJ13992,SJ13995,SJ14568,SJ16497,SJ16500,SJ20392,SJ21160,SJ22569,SJ22578,SJ22579,SJ22583	prot_S-latissima_F_contig1359.2641.1,prot_S-latissima_F_contig1359.2642.1,prot_S-latissima_F_contig444.11833.1,prot_S-latissima_F_contig503.12640.1	prot_S-rigidula_F_contig2571.4.1,prot_S-rigidula_F_contig26971.1.1,prot_S-rigidula_F_contig4542.1.1,prot_S-rigidula_F_contig4900.1.1
OG0000243	FALSE	NA	Ec-00_003720.1,Ec-00_007130.1,Ec-02_001360.1	prot_M-pyrifera_M_contig111552.2403.1,prot_M-pyrifera_M_contig22143.8296.1,prot_M-pyrifera_M_contig3383.10675.1,prot_M-pyrifera_M_contig52106.13582.1,prot_M-pyrifera_M_contig5698.14436.1	prot_M-clavaeformis_F_contig1535.3942.1,prot_M-clavaeformis_F_contig5537.15597.1	prot_P-littoralis_Contig1065.2.2,prot_P-littoralis_Contig1150.1.1,prot_P-littoralis_Contig231.71.1,prot_P-littoralis_Contig38.58.1,prot_P-littoralis_Contig466.45.1,prot_P-littoralis_Contig6.54.1,prot_P-littoralis_Contig741.21.1,prot_P-littoralis_Contig795.7.1,prot_P-littoralis_Contig99.39.1	prot_S-polyschides_M_contig105046.464.1,prot_S-polyschides_M_contig110844.983.1,prot_S-polyschides_M_contig114979.1386.1,prot_S-polyschides_M_contig28195.9523.1,prot_S-polyschides_M_contig66289.16211.1,prot_S-polyschides_M_contig7047.16703.1,prot_S-polyschides_M_contig86674.18411.1,prot_S-polyschides_M_contig91112.18928.1	prot_S-promiscuus_M_contig89.18613.1,prot_S-promiscuus_M_contig89.18621.1	SJ01321,SJ04696,SJ05928,SJ12757	prot_S-latissima_F_contig177.4900.1,prot_S-latissima_F_contig298.9160.1,prot_S-latissima_F_contig3.9249.1,prot_S-latissima_F_contig540.13144.1	prot_S-rigidula_F_contig5020.1.1
OG0000244	FALSE	prot_D-dichotoma_M_contig1015.221.1,prot_D-dichotoma_M_contig1117.992.1,prot_D-dichotoma_M_contig145.3296.1,prot_D-dichotoma_M_contig1557.3905.1,prot_D-dichotoma_M_contig170.4783.1,prot_D-dichotoma_M_contig1756.5066.1,prot_D-dichotoma_M_contig2204.7361.1,prot_D-dichotoma_M_contig231.7823.1,prot_D-dichotoma_M_contig2435.8349.1,prot_D-dichotoma_M_contig2442.8376.1,prot_D-dichotoma_M_contig3332.1144…	NA	NA	NA	NA	NA	prot_S-promiscuus_M_contig17.3997.1,prot_S-promiscuus_M_contig17.4004.1,prot_S-promiscuus_M_contig28.8285.1,prot_S-promiscuus_M_contig34.10771.1,prot_S-promiscuus_M_contig5.14445.1,prot_S-promiscuus_M_contig76.17773.1	SJ11901	NA	prot_S-rigidula_F_contig11921.1.1,prot_S-rigidula_F_contig12685.1.1,prot_S-rigidula_F_contig15067.2.1,prot_S-rigidula_F_contig16370.1.1,prot_S-rigidula_F_contig2175.1.1,prot_S-rigidula_F_contig22773.1.1,prot_S-rigidula_F_contig22831.2.1,prot_S-rigidula_F_contig22872.1.1,prot_S-rigidula_F_contig2397.5.1,prot_S-rigidula_F_contig27159.1.1
OG0000245	FALSE	prot_D-dichotoma_M_contig1495.3543.1,prot_D-dichotoma_M_contig915.19897.1	Ec-12_002690.1,Ec-12_002700.1,Ec-12_002710.1,Ec-12_002740.1,Ec-12_002760.1,Ec-12_002860.1,Ec-12_002880.1,Ec-12_002890.1,Ec-12_002900.1,Ec-12_002910.1,Ec-12_002920.1,Ec-12_002930.1	prot_M-pyrifera_M_contig33557.10628.1	prot_M-clavaeformis_F_contig1343.2723.1,prot_M-clavaeformis_F_contig1343.2724.1,prot_M-clavaeformis_F_contig1343.2725.1,prot_M-clavaeformis_F_contig267.8755.1,prot_M-clavaeformis_F_contig267.8756.1,prot_M-clavaeformis_F_contig267.8758.1,prot_M-clavaeformis_F_contig317.10293.1	prot_P-littoralis_Contig129.92.1,prot_P-littoralis_Contig129.98.2	prot_S-polyschides_M_contig12997.2693.1,prot_S-polyschides_M_contig334.10874.1,prot_S-polyschides_M_contig7699.17409.1	prot_S-promiscuus_M_contig5.14715.1,prot_S-promiscuus_M_contig5.14717.1,prot_S-promiscuus_M_contig51.15142.1,prot_S-promiscuus_M_contig51.15143.1	SJ01079,SJ01080,SJ20048	prot_S-latissima_F_contig442.11816.1,prot_S-latissima_F_contig442.11817.1	prot_S-rigidula_F_contig331.1.2
OG0000246	FALSE	prot_D-dichotoma_M_contig941.20150.1	Ec-26_001650.1,Ec-26_001660.1,Ec-26_001670.1	prot_M-pyrifera_M_contig1870.7480.1,prot_M-pyrifera_M_contig38040.11382.1,prot_M-pyrifera_M_contig70621.16859.1,prot_M-pyrifera_M_contig80329.18824.1	prot_M-clavaeformis_F_contig1569.4132.1,prot_M-clavaeformis_F_contig1569.4133.1,prot_M-clavaeformis_F_contig2065.6532.1,prot_M-clavaeformis_F_contig443.13426.1	prot_P-littoralis_Contig275.55.57,prot_P-littoralis_Contig902.4.1	prot_S-polyschides_M_contig12593.2371.1,prot_S-polyschides_M_contig14676.3813.1,prot_S-polyschides_M_contig19871.6459.1	prot_S-promiscuus_M_contig16.3518.1,prot_S-promiscuus_M_contig16.3554.1,prot_S-promiscuus_M_contig16.3558.1,prot_S-promiscuus_M_contig16.3559.1,prot_S-promiscuus_M_contig16.3568.1	SJ03882,SJ10632,SJ16737,SJ20699,SJ20700,SJ22251,SJ22252	prot_S-latissima_F_contig148.3450.1,prot_S-latissima_F_contig1688.4509.1,prot_S-latissima_F_contig489.12362.1	prot_S-rigidula_F_contig13041.1.2,prot_S-rigidula_F_contig15821.1.1,prot_S-rigidula_F_contig17499.1.1,prot_S-rigidula_F_contig27168.1.1,prot_S-rigidula_F_contig953.1.2
OG0000247	FALSE	prot_D-dichotoma_M_contig615.17033.1	Ec-00_003890.1,Ec-03_002310.1,Ec-19_003260.1,Ec-23_002300.1	NA	prot_M-clavaeformis_F_contig5349.15282.1,prot_M-clavaeformis_F_contig6640.17347.1	prot_P-littoralis_Contig10.138.1,prot_P-littoralis_Contig1042.11.1,prot_P-littoralis_Contig1129.24.1,prot_P-littoralis_Contig1211.6.2,prot_P-littoralis_Contig1216.7.1,prot_P-littoralis_Contig132.49.1,prot_P-littoralis_Contig1492.9.1,prot_P-littoralis_Contig1502.5.1,prot_P-littoralis_Contig155.99.1,prot_P-littoralis_Contig156.83.1,prot_P-littoralis_Contig158.10.1,prot_P-littoralis_Contig169.118.2,…	prot_S-polyschides_M_contig29257.9809.1	NA	SJ05807,SJ08198,SJ14378	prot_S-latissima_F_contig192.5579.1	NA
OG0000248	FALSE	prot_D-dichotoma_M_contig1455.3334.1,prot_D-dichotoma_M_contig2993.10331.1,prot_D-dichotoma_M_contig349.11840.1,prot_D-dichotoma_M_contig573.16530.1	Ec-04_004710.1,Ec-12_004070.1,Ec-14_005760.1,Ec-17_003090.1	prot_M-pyrifera_M_contig114510.3026.1,prot_M-pyrifera_M_contig114606.3041.1,prot_M-pyrifera_M_contig22133.8295.1,prot_M-pyrifera_M_contig2257.8384.1,prot_M-pyrifera_M_contig81945.19175.1,prot_M-pyrifera_M_contig8415.19636.1,prot_M-pyrifera_M_contig9719.22385.1	prot_M-clavaeformis_F_contig2434.7927.1,prot_M-clavaeformis_F_contig3261.10542.1	prot_P-littoralis_Contig142.69.2,prot_P-littoralis_Contig273.75.1,prot_P-littoralis_Contig53.52.3,prot_P-littoralis_Contig81.162.1	prot_S-polyschides_M_contig27181.9234.1,prot_S-polyschides_M_contig4130.12581.1	prot_S-promiscuus_M_contig4.12152.1,prot_S-promiscuus_M_contig5.14625.1,prot_S-promiscuus_M_contig6.16191.1,prot_S-promiscuus_M_contig6.16606.1	SJ13518,SJ14175,SJ16950,SJ20807	prot_S-latissima_F_contig102.191.1,prot_S-latissima_F_contig31.9476.1,prot_S-latissima_F_contig356.10394.1,prot_S-latissima_F_contig5.12533.1	prot_S-rigidula_F_contig18666.1.1,prot_S-rigidula_F_contig20006.2.1
OG0000249	FALSE	prot_D-dichotoma_M_contig1589.4075.1,prot_D-dichotoma_M_contig2724.9418.1,prot_D-dichotoma_M_contig28.9680.1,prot_D-dichotoma_M_contig3242.11185.1,prot_D-dichotoma_M_contig644.17388.1,prot_D-dichotoma_M_contig644.17389.1,prot_D-dichotoma_M_contig653.17462.1	Ec-10_004600.1,Ec-10_004640.1,Ec-23_001280.1,Ec-24_001090.1,Ec-24_001100.1,Ec-24_001110.1	NA	prot_M-clavaeformis_F_contig179.5296.1,prot_M-clavaeformis_F_contig2716.8910.1,prot_M-clavaeformis_F_contig539.15349.1,prot_M-clavaeformis_F_contig789.19073.1,prot_M-clavaeformis_F_contig90.20305.1	NA	prot_S-polyschides_M_contig178.5529.1,prot_S-polyschides_M_contig178.5530.1	prot_S-promiscuus_M_contig17.3778.1,prot_S-promiscuus_M_contig40.12879.1,prot_S-promiscuus_M_contig61.16714.1,prot_S-promiscuus_M_contig61.16715.1	SJ07383,SJ18717,SJ20102,SJ21625,SJ21631,SJ21632	prot_S-latissima_F_contig3.9240.1,prot_S-latissima_F_contig3.9241.1,prot_S-latissima_F_contig3.9243.1,prot_S-latissima_F_contig3970.11068.1	prot_S-rigidula_F_contig13229.2.1,prot_S-rigidula_F_contig4203.1.3,prot_S-rigidula_F_contig6429.1.1
OG0000250	FALSE	prot_D-dichotoma_M_contig133.2529.1,prot_D-dichotoma_M_contig159.4092.1,prot_D-dichotoma_M_contig28.9663.1	Ec-07_000620.1,Ec-08_002500.1,Ec-08_002510.1,Ec-23_003770.1	prot_M-pyrifera_M_contig36029.11037.1,prot_M-pyrifera_M_contig761.17950.1,prot_M-pyrifera_M_contig8161.19103.1,prot_M-pyrifera_M_contig9907.22790.1	prot_M-clavaeformis_F_contig1541.3982.1,prot_M-clavaeformis_F_contig2114.6738.1,prot_M-clavaeformis_F_contig2604.8525.1,prot_M-clavaeformis_F_contig2790.9144.1,prot_M-clavaeformis_F_contig33.10651.1,prot_M-clavaeformis_F_contig410.12704.1	prot_P-littoralis_Contig1070.11.3,prot_P-littoralis_Contig239.38.3,prot_P-littoralis_Contig38.3.1	prot_S-polyschides_M_contig26979.9176.1,prot_S-polyschides_M_contig32743.10712.1	prot_S-promiscuus_M_contig22.6388.1,prot_S-promiscuus_M_contig22.6389.1,prot_S-promiscuus_M_contig22.6395.1,prot_S-promiscuus_M_contig22.6396.1,prot_S-promiscuus_M_contig25.7267.1	SJ05785,SJ09270,SJ13393,SJ13394,SJ13400,SJ14141	prot_S-latissima_F_contig1185.1452.1,prot_S-latissima_F_contig2442.7657.1,prot_S-latissima_F_contig897.16770.1,prot_S-latissima_F_contig897.16771.1	NA
OG0000251	FALSE	prot_D-dichotoma_M_contig1172.1404.1,prot_D-dichotoma_M_contig2129.7009.1,prot_D-dichotoma_M_contig289.9979.1,prot_D-dichotoma_M_contig29.10006.1,prot_D-dichotoma_M_contig4156.13545.1,prot_D-dichotoma_M_contig764.18491.1	NA	prot_M-pyrifera_M_contig11789.3700.1,prot_M-pyrifera_M_contig38362.11453.1	NA	prot_P-littoralis_Contig186.18.1,prot_P-littoralis_Contig26.64.1,prot_P-littoralis_Contig29.178.1,prot_P-littoralis_Contig439.45.1,prot_P-littoralis_Contig483.78.1,prot_P-littoralis_Contig49.85.1,prot_P-littoralis_Contig528.20.1,prot_P-littoralis_Contig597.2.1,prot_P-littoralis_Contig712.15.1,prot_P-littoralis_Contig785.20.1,prot_P-littoralis_Contig811.46.1	prot_S-polyschides_M_contig10381.351.1,prot_S-polyschides_M_contig11457.1360.1,prot_S-polyschides_M_contig14437.3681.1,prot_S-polyschides_M_contig34892.11277.1,prot_S-polyschides_M_contig48041.13720.1,prot_S-polyschides_M_contig5730.15028.1,prot_S-polyschides_M_contig8953.18780.1	prot_S-promiscuus_M_contig2.4973.1,prot_S-promiscuus_M_contig37.11414.1,prot_S-promiscuus_M_contig5.14864.1	SJ09251,SJ22377	prot_S-latissima_F_contig10.20.1	prot_S-rigidula_F_contig15707.1.1,prot_S-rigidula_F_contig2056.5.1,prot_S-rigidula_F_contig238.1.1,prot_S-rigidula_F_contig25159.1.1,prot_S-rigidula_F_contig3368.3.1
OG0000252	FALSE	NA	Ec-00_009740.1	prot_M-pyrifera_M_contig122060.4547.1,prot_M-pyrifera_M_contig32895.10504.1,prot_M-pyrifera_M_contig38995.11558.1,prot_M-pyrifera_M_contig4377.12261.1,prot_M-pyrifera_M_contig52754.13697.1	NA	prot_P-littoralis_Contig1037.25.1,prot_P-littoralis_Contig137.101.1,prot_P-littoralis_Contig266.17.1,prot_P-littoralis_Contig284.73.1,prot_P-littoralis_Contig298.3.1,prot_P-littoralis_Contig31.202.1,prot_P-littoralis_Contig31.205.1,prot_P-littoralis_Contig593.12.1,prot_P-littoralis_Contig607.52.1,prot_P-littoralis_Contig980.28.1,prot_P-littoralis_Contig987.41.1	prot_S-polyschides_M_contig97404.19527.1	prot_S-promiscuus_M_contig1.311.1,prot_S-promiscuus_M_contig14.3105.1,prot_S-promiscuus_M_contig29.8680.1,prot_S-promiscuus_M_contig8.18225.1,prot_S-promiscuus_M_contig96.19187.1	SJ01199,SJ01717,SJ08207,SJ09095,SJ10154,SJ10636,SJ16842,SJ18463,SJ20152	prot_S-latissima_F_contig1087.705.1,prot_S-latissima_F_contig14.2940.1,prot_S-latissima_F_contig59.13661.1,prot_S-latissima_F_contig666.14417.1,prot_S-latissima_F_contig666.14418.1	NA
OG0000253	FALSE	NA	NA	prot_M-pyrifera_M_contig109459.1981.1	prot_M-clavaeformis_F_contig363.11509.1	prot_P-littoralis_Contig1039.27.1,prot_P-littoralis_Contig1098.5.1,prot_P-littoralis_Contig1278.1.1,prot_P-littoralis_Contig174.100.1,prot_P-littoralis_Contig195.77.3,prot_P-littoralis_Contig198.39.2,prot_P-littoralis_Contig248.19.3,prot_P-littoralis_Contig312.74.1,prot_P-littoralis_Contig334.4.1,prot_P-littoralis_Contig389.39.1,prot_P-littoralis_Contig397.38.1,prot_P-littoralis_Contig40.151.1,pr…	prot_S-polyschides_M_contig1732.5299.1,prot_S-polyschides_M_contig529.14390.1,prot_S-polyschides_M_contig69932.16641.1	prot_S-promiscuus_M_contig46.13884.1	SJ01551,SJ10173	prot_S-latissima_F_contig1052.455.1,prot_S-latissima_F_contig1216.1663.1,prot_S-latissima_F_contig2183.6691.1	NA
OG0000254	FALSE	NA	NA	NA	prot_M-clavaeformis_F_contig12477.2105.1,prot_M-clavaeformis_F_contig6750.17495.1	prot_P-littoralis_Contig108.129.1,prot_P-littoralis_Contig1293.17.1,prot_P-littoralis_Contig1293.18.1,prot_P-littoralis_Contig1361.4.1,prot_P-littoralis_Contig138.52.1,prot_P-littoralis_Contig144.29.1,prot_P-littoralis_Contig148.145.1,prot_P-littoralis_Contig1500.1.1,prot_P-littoralis_Contig1700.1.1,prot_P-littoralis_Contig184.29.1,prot_P-littoralis_Contig19.2.1,prot_P-littoralis_Contig224.104.1,…	NA	prot_S-promiscuus_M_contig16.3761.1	SJ01629,SJ03761,SJ03762,SJ15704	prot_S-latissima_F_contig20.5984.1,prot_S-latissima_F_contig20.5986.1,prot_S-latissima_F_contig20.5987.1	NA
OG0000255	FALSE	NA	Ec-02_003710.1,Ec-03_000750.1,Ec-21_002260.1,Ec-24_001120.1	NA	prot_M-clavaeformis_F_contig179.5294.1,prot_M-clavaeformis_F_contig2233.7182.1,prot_M-clavaeformis_F_contig4211.12963.1,prot_M-clavaeformis_F_contig4211.12964.1,prot_M-clavaeformis_F_contig480.14193.1	prot_P-littoralis_Contig146.15.1,prot_P-littoralis_Contig146.17.1,prot_P-littoralis_Contig1511.2.1,prot_P-littoralis_Contig195.85.1,prot_P-littoralis_Contig341.45.1,prot_P-littoralis_Contig402.31.1,prot_P-littoralis_Contig440.42.1,prot_P-littoralis_Contig440.46.1,prot_P-littoralis_Contig440.47.1,prot_P-littoralis_Contig49.163.1,prot_P-littoralis_Contig535.38.1,prot_P-littoralis_Contig536.6.1,prot…	prot_S-polyschides_M_contig1769.5481.1,prot_S-polyschides_M_contig6399.15921.1	prot_S-promiscuus_M_contig8.18242.1	SJ02229,SJ04670,SJ15061,SJ19154,SJ20775	prot_S-latissima_F_contig1087.702.1,prot_S-latissima_F_contig210.6376.1	prot_S-rigidula_F_contig12423.1.1,prot_S-rigidula_F_contig13097.2.1
OG0000256	FALSE	NA	Ec-05_005390.1	NA	prot_M-clavaeformis_F_contig2021.6364.1,prot_M-clavaeformis_F_contig2533.8277.1	NA	prot_S-polyschides_M_contig1619.4711.1,prot_S-polyschides_M_contig2281.7742.1,prot_S-polyschides_M_contig366.11603.1,prot_S-polyschides_M_contig74.17093.1	prot_S-promiscuus_M_contig41.12936.1,prot_S-promiscuus_M_contig41.12938.1	SJ02585,SJ04152,SJ04153,SJ05131,SJ05753,SJ05866,SJ05868,SJ06672,SJ07142,SJ07639,SJ08490,SJ10508,SJ15053,SJ15055,SJ15063,SJ17167,SJ17168,SJ19656,SJ20398,SJ20403,SJ20404,SJ20405,SJ20583	prot_S-latissima_F_contig1305.2316.1,prot_S-latissima_F_contig472.12243.1,prot_S-latissima_F_contig549.13210.1,prot_S-latissima_F_contig896.16767.1	prot_S-rigidula_F_contig3616.2.1
OG0000257	FALSE	prot_D-dichotoma_M_contig1211.1706.1	NA	prot_M-pyrifera_M_contig91232.21145.1	prot_M-clavaeformis_F_contig1166.1502.1,prot_M-clavaeformis_F_contig2298.7399.1,prot_M-clavaeformis_F_contig3488.11141.1,prot_M-clavaeformis_F_contig5311.15226.1	prot_P-littoralis_Contig630.1.1,prot_P-littoralis_Contig674.1.1	prot_S-polyschides_M_contig111803.1062.1,prot_S-polyschides_M_contig45221.13247.1	NA	SJ00323,SJ01004,SJ03064,SJ03367,SJ04489,SJ04685,SJ05130,SJ05518,SJ06780,SJ06827,SJ06938,SJ08077,SJ09140,SJ10583,SJ12184,SJ13749,SJ16560,SJ17538,SJ18763,SJ18885,SJ18927,SJ18972	prot_S-latissima_F_contig116.1284.1,prot_S-latissima_F_contig70.14857.1	prot_S-rigidula_F_contig4782.1.1,prot_S-rigidula_F_contig9565.2.1
OG0000258	FALSE	prot_D-dichotoma_M_contig1202.1644.1,prot_D-dichotoma_M_contig1202.1647.1,prot_D-dichotoma_M_contig1493.3539.1	Ec-08_004250.1,Ec-08_004450.1,Ec-10_000640.1,Ec-20_000870.1,Ec-20_000880.1	NA	prot_M-clavaeformis_F_contig113.1221.1,prot_M-clavaeformis_F_contig6300.16845.1	prot_P-littoralis_Contig100.64.2,prot_P-littoralis_Contig615.31.2,prot_P-littoralis_Contig615.36.1,prot_P-littoralis_Contig615.38.1,prot_P-littoralis_Contig615.40.1,prot_P-littoralis_Contig98.28.2	prot_S-polyschides_M_contig2306.7840.1	prot_S-promiscuus_M_contig29.8620.1,prot_S-promiscuus_M_contig48.14076.1,prot_S-promiscuus_M_contig8.18250.1	SJ01348,SJ01350,SJ01352,SJ01356,SJ01357,SJ10325,SJ10329,SJ10330,SJ11786,SJ11790,SJ20316	prot_S-latissima_F_contig1792.4994.1,prot_S-latissima_F_contig1792.4995.1	prot_S-rigidula_F_contig10813.1.2,prot_S-rigidula_F_contig1986.1.1,prot_S-rigidula_F_contig25394.1.1
OG0000259	FALSE	prot_D-dichotoma_M_contig245.8404.1,prot_D-dichotoma_M_contig3292.11315.1,prot_D-dichotoma_M_contig3622.12196.1,prot_D-dichotoma_M_contig3622.12198.1,prot_D-dichotoma_M_contig3726.12470.1,prot_D-dichotoma_M_contig3870.12813.1	Ec-09_001600.1,Ec-25_001100.1	prot_M-pyrifera_M_contig4632.12632.1,prot_M-pyrifera_M_contig4953.13150.1	prot_M-clavaeformis_F_contig3776.11897.1,prot_M-clavaeformis_F_contig752.18627.1,prot_M-clavaeformis_F_contig912.20435.1,prot_M-clavaeformis_F_contig965.20954.1	prot_P-littoralis_Contig136.46.2,prot_P-littoralis_Contig272.69.4	prot_S-polyschides_M_contig19039.6094.1,prot_S-polyschides_M_contig3339.10870.1,prot_S-polyschides_M_contig550.14689.1	prot_S-promiscuus_M_contig15.3213.1,prot_S-promiscuus_M_contig15.3214.1,prot_S-promiscuus_M_contig38.11642.1	SJ06801,SJ06802,SJ06803,SJ13221,SJ13222	prot_S-latissima_F_contig1020.192.1,prot_S-latissima_F_contig1020.193.1,prot_S-latissima_F_contig1441.3236.1,prot_S-latissima_F_contig2024.6097.1,prot_S-latissima_F_contig2596.8106.1,prot_S-latissima_F_contig2596.8107.1	prot_S-rigidula_F_contig1225.3.1,prot_S-rigidula_F_contig6891.1.1,prot_S-rigidula_F_contig7600.1.1
OG0000260	FALSE	prot_D-dichotoma_M_contig1192.1549.1,prot_D-dichotoma_M_contig1594.4114.1,prot_D-dichotoma_M_contig2038.6506.1	Ec-11_005600.1,Ec-11_005620.1,Ec-11_005640.1,Ec-11_005650.1,Ec-12_004140.1,Ec-12_004420.1,Ec-12_004430.1,Ec-12_004440.1,Ec-13_002560.1,Ec-13_002580.1	prot_M-pyrifera_M_contig13752.6059.1,prot_M-pyrifera_M_contig14576.6309.1	prot_M-clavaeformis_F_contig1982.6124.1,prot_M-clavaeformis_F_contig3230.10471.1,prot_M-clavaeformis_F_contig3235.10482.1,prot_M-clavaeformis_F_contig3800.11973.1,prot_M-clavaeformis_F_contig6193.16662.1,prot_M-clavaeformis_F_contig683.17591.1,prot_M-clavaeformis_F_contig683.17592.1	prot_P-littoralis_Contig231.86.1,prot_P-littoralis_Contig377.56.4,prot_P-littoralis_Contig96.8.1	prot_S-polyschides_M_contig29273.9814.1	prot_S-promiscuus_M_contig5.14574.1,prot_S-promiscuus_M_contig5.14576.1,prot_S-promiscuus_M_contig5.14577.1,prot_S-promiscuus_M_contig5.14617.1	SJ15979,SJ15997,SJ19643	prot_S-latissima_F_contig115.1230.1,prot_S-latissima_F_contig2011.6050.1	prot_S-rigidula_F_contig25714.1.1
OG0000261	FALSE	prot_D-dichotoma_M_contig1579.4014.1,prot_D-dichotoma_M_contig1579.4015.1,prot_D-dichotoma_M_contig2680.9248.1,prot_D-dichotoma_M_contig372.12457.1,prot_D-dichotoma_M_contig372.12458.1,prot_D-dichotoma_M_contig372.12460.1	Ec-07_005440.1,Ec-24_003960.1,Ec-24_003970.1,Ec-24_003990.1,Ec-25_001120.1	NA	prot_M-clavaeformis_F_contig1439.3336.1,prot_M-clavaeformis_F_contig1567.4124.1,prot_M-clavaeformis_F_contig2836.9294.1,prot_M-clavaeformis_F_contig2836.9295.1,prot_M-clavaeformis_F_contig912.20437.1	prot_P-littoralis_Contig136.40.1,prot_P-littoralis_Contig259.49.2	prot_S-polyschides_M_contig11541.1438.1,prot_S-polyschides_M_contig14493.3717.1,prot_S-polyschides_M_contig4253.12806.1,prot_S-polyschides_M_contig553.14733.1,prot_S-polyschides_M_contig5674.14946.1	prot_S-promiscuus_M_contig26.7740.1,prot_S-promiscuus_M_contig38.11636.1,prot_S-promiscuus_M_contig38.11639.1,prot_S-promiscuus_M_contig41.12905.1	SJ03709,SJ03710,SJ06131,SJ08092,SJ11966,SJ21212	prot_S-latissima_F_contig588.13623.1,prot_S-latissima_F_contig905.16869.1	prot_S-rigidula_F_contig10853.1.1
OG0000262	FALSE	prot_D-dichotoma_M_contig13.2330.1,prot_D-dichotoma_M_contig2126.6993.1,prot_D-dichotoma_M_contig275.9480.1,prot_D-dichotoma_M_contig2869.9887.1	Ec-01_002950.1,Ec-01_002960.1,Ec-01_002970.1,Ec-12_008530.1,Ec-22_002310.1	prot_M-pyrifera_M_contig29086.9772.1,prot_M-pyrifera_M_contig56205.14293.1,prot_M-pyrifera_M_contig6208.15290.1	prot_M-clavaeformis_F_contig120.1770.1,prot_M-clavaeformis_F_contig1221.1923.1,prot_M-clavaeformis_F_contig3252.10517.1,prot_M-clavaeformis_F_contig3252.10518.1,prot_M-clavaeformis_F_contig5113.14854.1,prot_M-clavaeformis_F_contig53.15193.1,prot_M-clavaeformis_F_contig53.15194.1	prot_P-littoralis_Contig1125.5.3,prot_P-littoralis_Contig571.17.1,prot_P-littoralis_Contig613.5.1,prot_P-littoralis_Contig92.8.2	prot_S-polyschides_M_contig11177.1057.1,prot_S-polyschides_M_contig14679.3817.1	prot_S-promiscuus_M_contig2.4736.1,prot_S-promiscuus_M_contig2.4737.1,prot_S-promiscuus_M_contig39.11911.1,prot_S-promiscuus_M_contig42.13158.1	SJ01420,SJ05892,SJ05893	prot_S-latissima_F_contig490.12424.1,prot_S-latissima_F_contig545.13166.1	prot_S-rigidula_F_contig10907.1.1,prot_S-rigidula_F_contig4888.1.1
OG0000263	FALSE	prot_D-dichotoma_M_contig455.14401.1,prot_D-dichotoma_M_contig598.16834.1,prot_D-dichotoma_M_contig598.16835.1	Ec-06_001820.1,Ec-22_000560.1,Ec-22_000570.1,Ec-28_000850.1	prot_M-pyrifera_M_contig112060.2524.1,prot_M-pyrifera_M_contig24348.8793.1,prot_M-pyrifera_M_contig83124.19414.1,prot_M-pyrifera_M_contig94970.21907.1	prot_M-clavaeformis_F_contig1147.1366.1,prot_M-clavaeformis_F_contig4020.12517.1,prot_M-clavaeformis_F_contig4425.13414.1,prot_M-clavaeformis_F_contig729.18320.1,prot_M-clavaeformis_F_contig729.18321.1	prot_P-littoralis_Contig73.105.1,prot_P-littoralis_Contig82.15.4	prot_S-polyschides_M_contig11228.1114.1,prot_S-polyschides_M_contig13208.2844.1,prot_S-polyschides_M_contig43784.12999.1,prot_S-polyschides_M_contig5038.14055.1	prot_S-promiscuus_M_contig37.11371.1,prot_S-promiscuus_M_contig37.11373.1,prot_S-promiscuus_M_contig7.17353.1,prot_S-promiscuus_M_contig7.17355.1	SJ18412,SJ18414,SJ19378	prot_S-latissima_F_contig430.11646.1,prot_S-latissima_F_contig430.11647.1,prot_S-latissima_F_contig430.11648.1,prot_S-latissima_F_contig430.11649.1,prot_S-latissima_F_contig69.14700.1,prot_S-latissima_F_contig69.14702.1	prot_S-rigidula_F_contig5348.1.1
OG0000264	FALSE	prot_D-dichotoma_M_contig115.1234.1,prot_D-dichotoma_M_contig115.1235.1,prot_D-dichotoma_M_contig115.1236.1,prot_D-dichotoma_M_contig115.1237.1	Ec-03_004810.1,Ec-25_000230.1,Ec-25_000240.1,Ec-25_000250.1	NA	prot_M-clavaeformis_F_contig1006.122.1,prot_M-clavaeformis_F_contig1006.123.1,prot_M-clavaeformis_F_contig1862.5641.1,prot_M-clavaeformis_F_contig2886.9433.1,prot_M-clavaeformis_F_contig3226.10450.1,prot_M-clavaeformis_F_contig3226.10452.1,prot_M-clavaeformis_F_contig3226.10453.1,prot_M-clavaeformis_F_contig39.12206.1,prot_M-clavaeformis_F_contig406.12601.1	prot_P-littoralis_Contig124.52.4,prot_P-littoralis_Contig124.53.1,prot_P-littoralis_Contig124.55.1,prot_P-littoralis_Contig124.56.1	prot_S-polyschides_M_contig3631.11552.1,prot_S-polyschides_M_contig3631.11553.1	prot_S-promiscuus_M_contig1.235.1,prot_S-promiscuus_M_contig1.237.1,prot_S-promiscuus_M_contig1.238.1,prot_S-promiscuus_M_contig1.239.1,prot_S-promiscuus_M_contig1.242.1,prot_S-promiscuus_M_contig38.11595.1,prot_S-promiscuus_M_contig38.11596.1	SJ02348,SJ11538	prot_S-latissima_F_contig2156.6584.1,prot_S-latissima_F_contig2156.6587.1,prot_S-latissima_F_contig540.13146.1	prot_S-rigidula_F_contig4165.1.3
OG0000265	FALSE	prot_D-dichotoma_M_contig130.2335.1,prot_D-dichotoma_M_contig436.14004.1	Ec-02_001340.1,Ec-02_002300.1,Ec-15_001700.1,Ec-15_003500.1	prot_M-pyrifera_M_contig10581.1244.1,prot_M-pyrifera_M_contig334.10597.1,prot_M-pyrifera_M_contig5140.13471.1	prot_M-clavaeformis_F_contig1220.1914.1,prot_M-clavaeformis_F_contig6355.16917.1	prot_P-littoralis_Contig342.18.1,prot_P-littoralis_Contig783.18.5	prot_S-polyschides_M_contig21460.7143.1,prot_S-polyschides_M_contig3585.11468.1,prot_S-polyschides_M_contig7056.16717.1,prot_S-polyschides_M_contig909.18908.1	prot_S-promiscuus_M_contig14.2660.1,prot_S-promiscuus_M_contig14.2661.1,prot_S-promiscuus_M_contig24.7170.1	SJ06226,SJ06227,SJ06691,SJ10521,SJ10523,SJ13245,SJ13711,SJ13954,SJ15345,SJ15346,SJ16376	prot_S-latissima_F_contig1089.715.1,prot_S-latissima_F_contig72.15070.1,prot_S-latissima_F_contig72.15071.1,prot_S-latissima_F_contig863.16503.1	prot_S-rigidula_F_contig2683.1.1
OG0000266	FALSE	NA	NA	prot_M-pyrifera_M_contig122254.4592.1,prot_M-pyrifera_M_contig50802.13374.1,prot_M-pyrifera_M_contig55649.14183.1,prot_M-pyrifera_M_contig56974.14435.1	prot_M-clavaeformis_F_contig10758.744.1,prot_M-clavaeformis_F_contig11624.1484.1	prot_P-littoralis_Contig473.41.1	prot_S-polyschides_M_contig80093.17719.1	prot_S-promiscuus_M_contig26.7523.1	SJ00262,SJ01294,SJ01599,SJ01860,SJ02525,SJ04027,SJ05452,SJ05524,SJ05678,SJ06095,SJ07518,SJ09499,SJ09500,SJ09501,SJ11839,SJ12039,SJ12092,SJ12368,SJ14671,SJ16498,SJ17013,SJ17486,SJ17824,SJ18928,SJ20145,SJ21869	prot_S-latissima_F_contig98.17525.1	NA
OG0000267	FALSE	NA	Ec-10_005180.1,Ec-10_005280.1,Ec-16_002400.1,Ec-16_002490.1,Ec-16_002720.1,Ec-16_002810.1	prot_M-pyrifera_M_contig28326.9608.1	prot_M-clavaeformis_F_contig1294.2412.1,prot_M-clavaeformis_F_contig18.5357.1,prot_M-clavaeformis_F_contig750.18611.1	prot_P-littoralis_Contig279.78.1,prot_P-littoralis_Contig29.135.1,prot_P-littoralis_Contig308.82.1,prot_P-littoralis_Contig329.7.3,prot_P-littoralis_Contig481.58.1,prot_P-littoralis_Contig928.7.1	prot_S-polyschides_M_contig17508.5402.1,prot_S-polyschides_M_contig76857.17401.1	prot_S-promiscuus_M_contig13.2584.1,prot_S-promiscuus_M_contig23.6610.1,prot_S-promiscuus_M_contig23.6612.1,prot_S-promiscuus_M_contig23.6616.1,prot_S-promiscuus_M_contig33.10569.1,prot_S-promiscuus_M_contig33.10571.1,prot_S-promiscuus_M_contig7.17373.1,prot_S-promiscuus_M_contig77.17775.1,prot_S-promiscuus_M_contig77.17803.1,prot_S-promiscuus_M_contig93.19161.1,prot_S-promiscuus_M_contig93.19165…	SJ09338,SJ11575,SJ15294,SJ15296,SJ22202	prot_S-latissima_F_contig1298.2234.1,prot_S-latissima_F_contig140.2962.1	NA
[truncated: 60,317 more rows]
