# Supplementary material for: Life-cycle-related gene expression patterns in the brown algae
Source: bioRxiv preprint, doi:10.1101/2025.04.25.649966, version 3 (2025-08-12)
Supplement: Table S4 [file 649966_file23.xlsx]

## Sheet: Table_S2_read_counts_Ectocarpus
	RNA-seq samples
Gene	pSP_Ec32_gametes_Rep1	pSP_Ec32_gametes_Rep2	pSP_Ec32_gametes_24h_Rep1	pSP_Ec32_gametes_24h_Rep2	pSP_Ec32_gametes_24h_Rep3	pSP_Ec32_gametes_48h_Rep1	pSP_Ec32_gametes_48h_Rep2	pSP_Ec32_gametes_48h_Rep3	pSP_Ec32_2.5.cells_Rep1	pSP_Ec32_2.5.cells_Rep2	pSP_Ec32_2.5.cells_Rep3	pSP_Ec32_immature_Rep1	pSP_Ec32_immature_Rep2	pSP_Ec32_immature_Rep3	pSP_Ec32_immature_Rep4	pSP_Ec566_immature_Rep1	pSP_Ec566_immature_Rep2	pSP_Ec32_immature_basal_Rep1	pSP_Ec32_immature_basal_Rep2	pSP_Ec32_immature_upright_Rep1	pSP_Ec32_immature_upright_Rep2	SP_Ec17_mixed_Rep1	SP_Ec17_mixed_Rep2	GA_Ec460_female_immature_Rep1	GA_Ec460_female_immature_Rep2	GA_Ec602_female_immature_Rep1	GA_Ec602_female_immature_Rep2	GA_Ec457_male_immature_Rep1	GA_Ec457_male_immature_Rep2	GA_Ec603_male_immature_Rep1	GA_Ec603_male_immature_Rep2	GA_Ec32_male_immature_Rep1	GA_Ec32_male_immature_Rep2	GA_Ec32_male_immature_Rep3	GA_Ec32_male_immature_Rep4	GA_Ec32_male_mixed_Rep1	GA_Ec32_male_mixed_Rep2	GA_Ec602_female_mature_Rep1	GA_Ec602_female_mature_Rep2	GA_Ec603_male_mature_Rep1	GA_Ec603_male_mature_Rep2
Ec-00_000010	0	0	1	1	0	0	2	0	16	24	3	0	0	0	0	0	0	2	3	13	7	0	0	0	0	0	0	0	0	0	0	0	0	7	0	5	16	0	0	0	0
Ec-00_000020	0	0	1	0	1	2	0	1	0	0	0	0	2	1	2	9	0	0	3	13	3	0	0	0	0	5	4	1	0	0	2	7	4	3	3	6	10	0	3	0	1
Ec-00_000030	1	0	3	12	4	11	13	8	2	6	4	19	20	13	51	12	1	4	4	15	11	2	1	7	8	4	1	7	3	11	10	10	12	17	20	7	7	7	5	6	12
Ec-00_000040	0	0	0	3	0	0	0	0	0	0	0	0	0	0	0	0	0	0	0	0	0	0	0	0	0	0	0	0	0	0	0	0	0	0	0	0	0	0	0	0	0
Ec-00_000050	0	2	15	25	16	25	76	33	46	29	53	178	169	65	210	87	47	63	61	148	160	42	22	59	64	275	391	61	78	399	421	248	238	195	199	51	36	54	115	138	260
Ec-00_000060	0	0	0	0	0	2	1	0	0	3	1	9	7	3	8	0	2	0	2	0	3	0	0	9	8	0	3	8	8	3	4	2	6	1	2	3	5	1	3	2	2
Ec-00_000070	0	0	1	1	3	13	11	2	12	12	13	16	22	6	39	7	11	4	1	7	6	11	2	33	18	7	13	12	25	11	10	18	16	14	15	5	7	3	2	2	9
Ec-00_000080	0	0	2	2	4	0	1	1	0	5	2	50	10	11	4	0	0	0	0	3	0	1	0	2	4	1	3	1	4	0	1	3	7	15	6	1	0	3	0	3	0
Ec-00_000085	0	0	0	0	1	1	0	0	0	0	0	0	0	0	0	0	0	0	0	0	0	1	1	1	0	0	0	0	0	0	0	0	0	0	0	0	0	0	0	0	0
Ec-00_000090	2	0	32	71	33	86	67	41	55	72	41	18	41	20	40	9	2	8	14	10	22	9	7	54	60	8	16	39	57	15	3	43	22	14	29	17	3	5	18	9	8
Ec-00_000095	0	1	3	4	4	2	14	11	6	16	5	40	52	48	85	21	10	11	14	24	17	5	5	20	45	32	39	41	57	33	58	44	58	41	70	22	8	11	22	4	20
Ec-00_000110	26	25	303	493	274	274	440	367	149	170	705	482	558	99	280	215	154	128	93	82	70	152	77	299	155	62	93	188	205	201	193	351	654	316	385	18	102	94	63	88	61
Ec-00_000120	109	97	34	42	26	28	34	37	48	41	58	213	242	142	236	20	68	51	64	75	78	78	62	76	66	101	159	59	72	319	351	257	231	227	513	24	44	71	102	82	76
Ec-00_000130	9	10	48	60	43	76	248	189	74	71	86	776	813	330	795	164	88	204	203	357	383	116	74	196	251	276	440	191	187	577	503	929	1101	540	1001	37	109	189	419	224	584
Ec-00_000140	52	30	507	485	379	215	410	315	535	665	328	273	188	97	358	282	189	152	187	280	245	76	44	315	276	389	393	245	410	354	413	325	358	247	294	227	300	131	193	183	443
Ec-00_000150	3	3	9	16	8	20	29	25	5	7	2	414	371	193	485	16	16	5	14	160	163	33	24	283	302	507	499	409	407	1080	1194	505	436	472	543	184	174	168	260	146	162
Ec-00_000160	15	16	447	532	422	275	733	782	95	147	193	716	759	128	558	180	160	233	198	330	319	134	108	139	133	315	752	99	99	298	402	639	500	320	241	53	45	103	349	175	233
Ec-00_000170	0	0	0	0	0	0	1	0	0	0	0	0	0	0	1	0	0	0	0	0	0	0	0	0	0	2	0	2	0	0	0	0	0	0	0	0	0	0	0	0	0
Ec-00_000180	0	0	0	1	1	10	14	5	0	0	0	0	0	0	1	13	6	9	7	0	3	0	0	0	0	0	0	0	0	0	0	0	6	0	1	0	0	0	0	0	0
Ec-00_000190	43	26	106	161	113	153	104	84	96	199	130	237	251	116	353	49	48	87	108	145	132	21	12	38	32	64	42	37	57	52	48	271	264	135	219	109	61	28	22	35	44
Ec-00_000200	313	258	195	199	147	185	347	242	209	233	232	1267	1298	737	1761	412	394	445	452	610	605	565	470	542	703	1029	1442	637	587	1150	1148	1489	1351	1107	1364	252	583	421	778	394	504
Ec-00_000210	552	411	763	1056	749	544	700	623	506	843	641	2088	1521	443	1646	1384	1203	554	521	664	682	796	508	602	450	1232	1863	542	684	1848	2010	1691	1813	1725	1930	470	839	522	662	531	558
Ec-00_000220	0	0	0	0	0	0	0	0	0	0	0	0	0	0	0	0	0	0	0	0	0	0	0	14	0	0	7	2	4	0	0	0	0	0	0	0	0	0	0	0	1
Ec-00_000230	69	63	33	66	19	19	18	9	332	301	369	1170	854	1341	3389	426	581	148	163	216	194	785	749	1816	1874	2577	2819	1100	2108	2653	2698	960	1004	2824	4108	345	955	579	231	376	491
Ec-00_000240	49	45	155	143	100	75	166	168	124	181	187	723	613	227	800	159	165	222	247	384	398	134	75	0	0	0	0	0	0	0	0	914	687	705	681	252	419	0	0	0	0
Ec-00_000260	3	1	0	2	0	3	0	0	1	0	0	24	24	11	24	0	0	0	0	21	11	1	1	55	50	6	7	16	34	6	5	42	88	31	27	2	0	10	12	28	26
Ec-00_000270	0	0	0	1	0	0	0	0	0	0	0	1	1	3	0	0	0	0	0	0	0	0	0	5	10	0	0	2	1	0	0	0	1	0	0	0	0	0	0	0	0
Ec-00_000280	3	0	3	7	1	3	3	6	0	0	0	0	0	0	9	2	2	0	3	16	6	0	0	62	93	40	70	95	90	59	38	151	124	65	64	19	7	4	10	5	2
Ec-00_000290	1	0	0	3	6	3	3	7	1	1	1	3	5	1	5	1	1	0	0	11	3	3	3	6	5	1	0	17	16	0	2	8	7	79	9	12	3	3	2	1	1
Ec-00_000300	0	0	2	1	0	1	1	0	2	6	3	7	0	0	1	0	1	0	0	1	2	5	8	9	19	15	7	15	14	9	22	6	2	1	2	0	1	0	1	0	0
Ec-00_000310	0	1	0	2	1	2	0	4	0	0	0	39	45	18	46	1	0	0	1	23	15	4	3	52	43	26	25	25	48	33	32	51	43	66	95	7	2	13	11	38	33
Ec-00_000320	164	105	100	133	107	158	174	146	276	224	485	5710	7502	4450	8650	736	587	2940	2853	1671	2317	1971	1333	3271	3697	3560	3998	3973	4149	7146	6818	4079	5530	3736	7189	459	630	1945	2803	1184	1071
Ec-00_000330	3	6	0	0	0	1	0	1	0	0	0	2	0	0	3	8	12	5	5	5	6	35	7	58	24	2	1	0	3	0	2	1	1	0	0	1	3	0	0	0	0
Ec-00_000340	1	0	0	0	0	0	0	0	0	0	0	366	222	21	43	0	4	0	1	54	41	0	3	0	0	11	12	0	1	20	12	274	170	0	69	16	21	1	0	1	2
Ec-00_000350	24	16	193	312	190	148	194	218	198	223	181	183	133	64	157	138	121	67	91	85	91	78	57	322	238	253	222	299	409	288	305	133	158	128	193	98	187	82	102	108	194
Ec-00_000370	5	89	106	164	84	197	99	46	25	20	22	184	243	136	142	29	15	25	23	34	14	2	1	95	164	2	1	139	137	10	4	162	209	112	207	16	20	3	6	2	7
Ec-00_000360	20	20	4	5	5	2	2	0	3	9	8	1	2	1	2	1	1	0	0	0	2	7	9	11	9	0	0	8	11	0	0	1	1	4	3	0	0	0	0	1	0
Ec-00_000380	0	1	27	5	4	4	5	4	1	1	2	3	2	0	5	0	1	1	0	5	6	1	1	1	0	0	1	5	8	0	0	2	5	0	2	0	0	2	1	4	7
Ec-00_000390	17	8	261	202	111	221	364	235	241	298	245	582	513	249	596	368	158	283	240	198	234	142	100	457	380	380	418	409	388	395	428	564	574	407	514	265	274	168	249	124	219
Ec-00_000400	0	0	0	0	0	0	0	0	0	1	0	0	0	0	1	0	1	6	2	0	1	9	2	19	2	0	2	0	2	0	0	0	0	0	0	0	0	0	0	0	0
Ec-00_000410	15	4	381	407	301	165	380	498	82	136	165	1027	816	320	1178	151	457	138	134	351	277	258	216	130	139	960	2048	152	104	2066	2431	847	629	872	822	71	350	361	457	516	870
Ec-00_000420	0	0	1	1	1	0	1	1	0	0	1	0	0	0	0	0	0	0	0	0	0	0	0	2	0	0	0	2	0	0	1	0	0	0	0	0	0	0	0	0	0
Ec-00_000430	65	58	59	94	69	79	65	61	76	116	60	123	127	88	101	40	19	25	30	22	35	45	51	348	445	83	95	123	136	49	41	75	94	58	109	32	18	14	21	12	24
Ec-00_000435	1	3	3	3	1	7	4	3	1	1	4	0	1	0	0	0	0	0	0	0	1	0	0	4	5	0	0	0	1	0	0	0	0	0	0	0	0	0	1	0	0
Ec-00_000440	6	1	39	34	18	72	147	98	44	114	128	466	422	112	548	171	173	173	111	201	185	116	112	201	152	352	723	74	101	309	431	364	315	314	235	62	191	97	137	113	135
Ec-00_000450	0	0	14	3	1	0	1	8	0	0	2	3	1	0	30	7	8	0	0	0	3	6	9	2	5	1	1	7	3	0	1	7	2	11	4	1	0	1	1	0	1
Ec-00_000470	0	0	0	0	0	0	1	0	0	0	0	1	0	0	0	0	0	0	0	0	0	0	0	0	0	0	0	0	0	0	0	0	0	0	0	0	0	0	0	0	0
Ec-00_000480	0	0	0	0	0	0	0	0	0	0	0	0	0	0	0	0	0	0	0	0	0	0	0	0	0	0	0	0	0	0	0	0	0	0	0	0	0	0	0	0	0
Ec-00_000500	3	4	41	40	22	50	36	33	69	84	27	189	104	49	145	41	50	30	44	37	45	25	31	62	116	114	62	121	80	140	144	94	81	109	119	63	117	49	79	35	79
Ec-00_000510	12	10	137	131	144	96	109	99	39	70	45	265	197	116	216	154	141	85	56	82	63	69	37	127	94	139	151	71	72	123	137	203	191	167	179	57	138	37	54	23	85
Ec-00_000520	77	59	28	35	30	53	34	29	7	26	16	49	68	35	103	30	17	30	20	44	36	16	6	44	39	54	64	32	36	92	79	106	88	55	70	24	40	35	46	56	88
Ec-00_000530	5	7	105	132	105	75	138	132	66	84	85	306	276	121	458	76	145	84	91	180	153	94	70	100	83	220	412	60	89	466	517	428	374	283	358	22	76	86	115	145	168
Ec-00_000540	24	23	406	411	140	887	677	353	2566	1741	2325	2712	2643	967	2082	1283	904	1054	1110	1204	1482	1319	1154	5416	4701	6070	7011	4873	3908	1691	1671	2751	2215	2288	2443	1409	2608	541	771	496	414
Ec-00_000550	1	0	50	53	34	55	75	46	98	118	103	82	65	51	128	89	73	126	114	143	113	38	21	94	77	171	207	48	82	216	202	89	96	80	86	78	71	42	93	70	125
Ec-00_000560	5	2	33	53	34	29	27	23	10	32	26	34	45	36	68	46	7	41	35	47	44	11	3	42	41	91	96	29	35	66	75	87	68	42	43	24	45	24	66	27	78
Ec-00_000570	5	0	28	32	30	27	23	16	16	21	18	42	41	36	82	66	40	45	37	46	47	52	38	38	59	80	84	51	45	93	94	30	45	26	48	38	26	36	62	36	76
Ec-00_000580	2	1	6	8	9	29	14	7	11	5	7	76	66	24	98	4	3	8	5	28	25	4	2	122	147	12	8	116	120	16	15	53	74	79	76	19	7	35	54	62	24
Ec-00_000590	150	111	39	43	14	38	58	26	158	223	327	225	171	174	627	207	344	643	643	325	327	246	168	670	327	181	149	217	315	178	160	139	220	340	430	131	231	112	113	149	133
Ec-00_000600	3	3	130	143	113	155	277	217	306	508	419	177	141	74	178	274	170	187	217	218	178	67	49	291	190	241	255	199	371	339	365	180	189	88	187	187	223	156	292	208	650
Ec-00_000610	0	0	0	0	0	1	0	0	0	0	0	0	0	0	1	0	0	0	0	0	0	0	0	0	0	0	0	0	0	0	0	0	0	0	1	0	0	0	1	0	0
Ec-00_000620	0	1	0	1	1	0	3	1	0	0	0	0	1	0	1	0	0	0	1	0	0	0	0	0	0	1	0	0	0	2	2	0	0	0	2	0	0	0	0	0	0
Ec-00_000625	1	3	13	23	15	10	5	23	2	6	5	12	4	2	33	0	0	0	0	51	34	3	2	261	349	34	47	563	511	201	194	771	440	168	265	131	10	53	55	38	62
Ec-00_000630	0	0	8	8	1	0	8	6	0	0	0	0	0	0	0	0	0	0	0	0	0	0	0	1	18	0	1	1	3	0	1	0	0	0	1	0	0	0	2	1	2
Ec-00_000640	3	0	117	161	101	115	169	181	37	97	68	285	188	92	359	92	132	97	111	153	139	75	55	73	62	573	1079	57	47	745	847	263	199	213	206	52	127	94	119	129	177
Ec-00_000650	2550	2047	239	595	510	288	216	251	75	156	76	372	361	186	463	181	84	69	67	138	129	85	73	355	305	332	207	287	284	218	227	323	353	340	517	149	93	59	106	96	137
Ec-00_000660	2	0	167	395	367	237	180	180	0	2	1	0	0	0	0	69	54	36	48	111	110	0	0	0	0	0	0	0	0	0	0	1	1	0	1	35	50	49	89	118	135
Ec-00_000670	84	51	1234	1395	1176	658	1501	1305	909	829	1079	2248	2360	1030	2829	865	998	773	824	1137	1152	1075	743	1594	1571	2521	3461	1432	1534	3503	3717	3059	3472	1613	2342	418	874	832	1355	1302	2874
Ec-00_000680	229	157	172	265	117	98	129	96	86	133	92	74	53	16	73	212	135	63	77	124	117	22	15	49	22	79	84	31	79	120	153	60	81	43	48	23	74	82	78	113	177
Ec-00_000690	692	564	97	124	81	80	79	66	58	106	70	287	220	104	207	128	61	44	48	68	75	40	30	68	43	63	91	41	62	159	153	137	228	160	248	10	52	21	37	45	59
Ec-00_000700	1	1	1	6	6	7	6	3	0	0	0	0	1	0	2	0	0	0	0	1	0	0	0	1	1	0	0	2	2	0	0	1	0	4	0	0	0	0	0	0	0
Ec-00_000710	5	3	1	2	5	4	5	2	7	11	5	18	14	11	38	7	8	4	3	16	18	1	0	29	24	10	15	13	21	29	23	40	48	58	40	19	22	11	16	25	30
Ec-00_000720	5	0	11	24	24	35	76	47	49	63	79	337	249	119	446	130	106	87	86	79	96	84	55	187	206	316	341	185	198	330	386	244	256	235	288	45	49	55	126	100	130
Ec-00_000730	49	43	27	38	22	23	51	26	7	31	17	94	71	20	114	46	49	35	33	36	48	18	19	37	43	109	103	35	47	72	113	37	43	68	43	38	51	22	34	30	59
Ec-00_000740	0	1	1149	2320	562	1915	1885	297	3	4	25	0	0	13	1	13777	3404	25585	16672	15257	15160	7	7	60	44	8	0	35	55	5	7	23	8	14	25	26887	13676	2631	10992	7638	4741
Ec-00_000750	0	1	1	0	0	0	0	0	1	1	68	9	20	85	204	7	68	71	43	10	9	0	0	0	0	0	1	0	0	0	0	0	0	2	6	0	0	0	0	0	1
Ec-00_000760	0	0	0	0	0	0	0	0	0	0	0	0	0	0	0	0	0	0	0	0	0	0	0	0	0	0	0	0	0	0	0	0	0	0	0	0	0	0	0	0	0
Ec-00_000770	0	1	42	71	50	59	51	61	56	108	88	95	92	49	123	175	53	106	103	77	55	23	21	81	76	149	99	65	55	73	80	102	120	54	64	61	30	34	71	37	51
Ec-00_000780	0	1	1	1	2	2	6	0	2	0	0	0	3	0	0	0	0	0	0	0	0	0	0	0	2	0	0	0	1	0	0	0	1	1	0	0	0	0	0	0	0
Ec-00_000790	2	1	10	11	11	6	25	12	19	26	14	83	90	37	87	22	39	15	35	26	26	31	21	47	48	85	150	33	28	138	152	55	51	80	51	20	51	19	28	25	22
Ec-00_000800	0	0	0	0	0	0	0	0	0	0	0	0	1	0	0	0	0	0	0	0	0	0	0	0	0	0	0	0	0	0	0	0	0	0	0	0	0	0	0	0	0
Ec-00_000810	0	3	55	47	33	60	94	40	47	77	75	191	156	72	207	77	87	59	83	114	110	61	39	150	130	262	406	100	123	519	574	208	256	110	298	69	68	88	148	118	114
Ec-00_000820	103	98	163	180	135	222	392	255	219	325	635	1568	1995	984	1823	424	632	426	390	548	543	466	400	550	459	1024	1640	411	444	1952	2098	2273	2113	1542	2571	187	639	583	987	760	848
Ec-00_000830	1	0	1	1	1	1	3	0	0	1	1	6	5	1	13	1	0	0	4	2	2	41	30	9	11	0	1	10	7	0	0	11	17	9	10	1	1	4	3	1	3
Ec-00_000840	0	0	0	0	0	0	0	0	0	0	0	0	0	0	0	0	0	0	0	0	0	0	0	0	0	0	0	0	0	0	0	0	0	0	0	0	0	0	0	0	0
Ec-00_000850	0	0	2	6	2	6	9	2	2	5	1	1	1	2	4	1	0	1	0	4	1	0	2	1	0	0	1	1	1	0	0	7	10	3	5	0	1	1	0	0	1
Ec-00_000860	60	49	135	202	128	109	189	135	125	152	365	284	213	55	182	171	135	58	61	86	92	40	32	265	169	210	261	201	249	173	159	185	175	172	96	60	227	55	57	64	66
Ec-00_000870	1	0	2	2	0	0	1	2	0	0	2	1	0	0	0	0	2	0	0	0	1	1	9	32	25	1	0	22	29	1	2	0	0	0	0	1	0	0	1	0	2
Ec-00_000880	11	8	59	90	64	71	42	38	44	84	59	91	116	73	138	41	50	33	32	49	29	20	10	42	28	92	176	33	35	134	162	103	113	84	115	19	53	26	39	30	49
Ec-00_000890	0	0	0	0	0	0	0	0	0	0	0	0	0	0	0	0	1	0	0	0	0	0	0	0	0	0	0	0	2	0	0	1	0	0	0	0	0	0	1	0	0
Ec-00_000900	0	0	0	1	0	1	0	0	0	0	0	0	0	0	0	0	0	0	0	0	0	0	0	0	0	0	0	0	0	0	0	0	0	0	0	0	0	0	0	0	0
Ec-00_000910	0	0	0	1	0	0	0	0	0	0	0	0	0	0	0	0	0	0	0	1	0	0	0	0	1	3	1	1	2	1	1	1	0	0	0	0	0	0	0	0	0
Ec-00_000920	0	0	1	0	0	0	0	0	0	0	0	64	0	0	0	0	0	0	0	1	1	0	0	0	0	0	0	0	0	0	0	0	0	0	0	0	0	0	0	3	2
Ec-00_000930	0	0	0	0	1	0	0	0	0	0	2	12	12	21	5	1	5	0	0	1	1	17	11	10	11	7	3	9	7	26	9	4	5	4	33	0	2	7	15	3	1
Ec-00_000940	97	74	385	345	227	456	607	392	754	1004	600	4972	6129	3323	5552	719	915	1046	1832	1711	1727	951	830	1313	1748	1525	2413	1750	1534	4222	4430	6746	6702	3337	8467	671	567	1484	2593	1520	2451
Ec-00_000950	5580	4600	2537	3156	1937	1833	3176	2327	1263	1393	2442	7717	10634	5847	10473	1762	2718	2180	2357	3450	3412	2868	2423	3961	3805	5397	9204	3459	3453	11435	11411	10551	10091	7505	11831	827	1910	2742	4483	2812	3464
Ec-00_000960	6	5	10	17	8	8	7	4	2	1	7	3	1	6	6	1	0	2	1	3	1	2	3	9	2	6	4	12	13	1	1	1	0	5	3	0	2	1	1	1	1
Ec-00_000970	197	134	534	705	300	444	626	573	517	805	546	3054	2203	1443	3459	1114	1195	935	879	1115	1084	834	637	1792	1807	3159	3570	2144	1680	4107	4652	2557	2354	2944	3173	1327	1320	943	1493	1056	1200
Ec-00_000980	147	136	708	693	491	819	1258	924	1075	1094	910	5639	6485	2846	5544	1194	1097	1168	1353	2705	2459	1485	1187	2426	3073	3778	6411	2928	2540	7198	6964	9200	8726	6216	11068	792	1626	1645	3189	1760	1420
Ec-00_000990	5	10	10	18	23	40	49	23	7	12	9	325	452	186	412	5	13	1	7	143	109	13	2	124	100	116	93	112	138	236	285	255	375	384	796	20	20	55	69	171	81
Ec-00_001000	45	38	10	23	16	8	6	6	8	6	1	637	877	223	713	7	11	7	19	510	342	16	11	416	329	140	115	373	527	308	349	877	1493	943	1187	93	31	95	205	454	605
Ec-00_001010	3	2	7	8	6	13	3	2	2	5	0	6	3	1	8	2	6	1	3	1	3	1	1	3	14	7	5	13	15	0	0	4	6	3	2	11	5	0	2	0	0
Ec-00_001020	112	87	239	294	164	227	332	241	216	279	262	1230	1337	513	1315	357	331	319	370	388	423	557	491	793	832	614	1084	699	785	1117	1193	1124	1111	986	1803	139	149	154	295	143	76
Ec-00_001030	329	246	41	67	79	30	17	15	14	15	5	16	42	36	68	4	38	0	1	4	5	10	5	65	22	0	2	10	51	3	4	37	55	135	80	1	0	1	1	0	1
Ec-00_001040	166	165	38	56	96	48	50	40	28	42	24	593	573	211	442	41	18	24	33	80	74	18	16	652	638	51	30	371	540	208	220	490	732	592	1118	53	15	109	232	152	182
Ec-00_001070	129	94	430	308	219	345	555	419	186	310	204	1270	1508	515	1145	415	376	393	339	184	252	370	324	265	350	333	332	278	256	526	510	397	549	437	706	91	160	173	174	126	181
Ec-00_001080	24	32	429	582	373	465	672	609	381	530	473	1953	1846	888	1991	591	656	482	505	692	661	401	318	996	858	886	1371	825	1005	1861	1936	1857	1674	1489	2177	355	598	510	751	725	1086
Ec-00_001090	13	9	77	133	79	133	233	118	131	188	97	597	589	255	681	230	161	171	208	200	264	196	159	257	336	212	259	386	299	295	304	447	470	498	580	108	102	109	248	119	128
Ec-00_001100	453	400	46	36	32	46	95	77	56	42	18	1315	1564	292	617	108	129	85	115	150	149	115	105	495	660	205	181	489	496	266	231	1143	1074	502	316	54	360	90	102	95	102
Ec-00_001110	36	40	1	5	13	6	1	2	0	0	1	513	610	182	329	7	8	1	5	155	93	7	6	366	263	94	52	187	282	139	113	280	506	263	537	26	6	39	64	82	135
Ec-00_001120	2	3	3	6	3	0	1	2	1	0	0	254	401	115	332	12	5	1	10	202	158	11	6	135	144	116	101	106	147	167	168	171	302	235	462	19	6	35	71	109	154
Ec-00_001130	59	41	653	991	591	413	695	776	170	166	196	1291	914	392	1284	260	350	140	181	259	301	499	407	567	638	967	1521	757	574	1449	1658	733	571	943	1108	132	444	285	443	332	447
Ec-00_001140	73	53	763	1032	828	1444	1501	1204	1250	2180	1504	3182	4058	2240	4308	1937	1014	1527	1356	1415	1261	602	464	2132	1902	1995	2109	1542	1919	1818	1983	4537	4534	2304	3874	964	750	766	1382	1106	1650
Ec-00_001150	3	8	113	91	89	141	577	249	162	165	117	1636	1441	416	907	308	519	374	386	193	316	411	292	344	408	327	428	398	308	658	612	582	918	604	159	77	209	513	566	271	380
Ec-00_001160	26	32	407	540	380	324	394	393	228	333	236	803	820	349	903	335	317	249	289	314	322	275	228	474	533	712	696	440	510	826	904	687	702	641	881	201	263	220	327	259	469
Ec-00_001170	133	116	905	1365	800	1694	2933	2150	700	1011	1402	4090	4770	2055	4330	2368	784	2859	2333	2311	2203	1885	1532	2820	3268	3247	4463	2292	2101	2428	2892	4398	3369	2345	3892	735	824	492	1025	723	685
Ec-00_001180	22	24	60	78	49	145	152	104	32	44	43	790	1016	364	716	113	22	91	90	249	255	34	33	886	1030	639	797	492	504	330	369	753	776	505	441	188	70	75	134	109	167
Ec-00_001190	28	16	305	359	219	226	533	432	214	253	205	1423	1541	801	1451	315	514	310	367	458	446	517	395	531	666	631	887	663	537	1212	1175	1200	1192	1197	1810	165	461	380	566	424	346
Ec-00_001200	5	3	5	24	11	13	17	15	1	1	4	487	607	315	988	28	11	1	4	148	103	12	10	404	417	474	205	235	423	710	618	418	579	843	1498	66	43	98	143	359	367
Ec-00_001210	64	65	4	11	27	14	6	12	0	0	0	80	82	8	31	6	0	2	0	20	11	0	1	54	43	17	3	25	32	9	19	58	76	42	55	10	2	10	15	33	21
Ec-00_001220	416	316	6	35	61	38	23	21	2	10	2	549	449	69	171	12	9	3	9	162	107	3	5	186	146	83	49	89	103	70	102	369	497	272	251	25	20	62	81	125	167
Ec-00_001230	17	10	243	244	185	144	283	297	186	199	139	1540	1047	297	1126	190	316	188	177	267	271	228	163	395	401	396	753	330	721	1078	896	940	898	1411	830	70	1502	307	189	239	258
Ec-00_001240	174	102	4841	9517	6003	8993	14857	11826	19369	28649	20291	19468	15923	8724	25753	31211	24730	32088	30427	18641	21420	10211	5321	41645	27479	51686	58876	25589	35396	42304	43704	18525	19982	11077	16146	16669	24789	5527	8991	5754	4873
Ec-00_001250	3	1	45	42	41	59	67	46	23	40	9	33	31	24	37	32	24	20	20	7	13	17	10	40	44	14	38	30	44	23	31	24	14	23	16	9	22	5	14	8	2
Ec-00_001260	2	2	17	24	14	15	24	12	24	44	8	33	18	2	20	20	9	10	7	4	9	8	5	34	21	29	37	22	39	19	27	24	14	9	11	2	9	5	6	2	3
Ec-00_001270	1	2	13	19	14	19	16	11	10	15	5	31	25	11	18	12	13	11	12	5	9	5	3	12	15	19	32	13	18	19	17	22	8	14	15	4	12	1	8	1	7
Ec-00_001280	97	53	218	313	184	212	311	236	87	124	89	370	278	147	295	143	138	72	76	84	126	106	64	175	217	355	438	189	235	384	430	240	239	211	241	58	140	82	110	107	121
Ec-00_001290	6324	5009	771	1544	1499	640	678	846	314	405	334	1888	2214	814	1966	418	779	415	546	731	726	451	323	380	435	1055	1410	534	559	2463	2601	1324	1199	1629	1529	164	819	592	789	703	817
Ec-00_001300	309	257	381	347	295	438	318	279	223	416	420	1571	1696	864	1558	509	525	465	469	591	607	340	274	1210	664	804	837	511	1034	1065	1210	1611	2026	1007	1551	182	442	480	550	471	712
Ec-00_001310	69	57	838	1433	811	756	970	1077	218	385	256	1046	1031	593	1471	257	326	244	264	298	339	356	228	844	718	631	922	763	864	902	903	912	830	533	808	202	222	173	372	241	391
Ec-00_001320	168	127	512	554	317	486	878	533	190	186	304	1786	1528	753	2035	473	697	423	375	430	466	658	517	555	487	1197	2245	419	393	1566	1680	1349	1059	1413	1473	158	501	279	319	333	282
Ec-00_001330	338	299	16	89	116	51	22	34	3	3	0	30	25	11	12	0	0	0	0	11	6	0	0	21	17	4	2	20	9	32	34	41	53	77	109	1	2	11	4	20	5
Ec-00_001340	1	4	49	36	21	24	43	47	3046	2424	3278	205	233	155	244	88	201	94	82	84	87	56	30	90	71	244	618	95	109	427	445	237	229	173	266	387	610	90	135	239	108
Ec-00_001350	2	8	49	48	45	63	69	60	95	131	191	215	171	117	231	105	96	62	68	95	92	87	57	209	248	218	247	221	217	313	326	183	290	193	452	82	78	72	107	83	115
Ec-00_001360	2954	2466	717	739	536	422	740	639	434	665	607	2239	3179	1973	4277	1342	843	1636	1511	1720	1535	1253	935	869	1023	2538	3840	813	775	3206	3468	4587	4271	1806	5005	469	194	454	983	766	935
Ec-00_001370	65	57	246	335	239	364	399	328	371	540	582	2590	2485	1386	3076	770	657	711	657	900	921	641	505	1496	1375	1122	1235	1123	1452	1817	2002	2471	2488	2479	3547	539	413	684	1085	1022	957
Ec-00_001380	217	204	746	1285	723	967	1064	965	264	364	202	1442	1111	412	1058	353	420	201	263	279	334	495	411	689	925	1614	1945	968	756	1956	2045	719	698	898	1181	203	522	252	330	267	441
Ec-00_001390	19	15	73	128	71	302	234	135	227	372	162	704	983	485	976	332	237	299	360	289	334	351	273	827	887	430	512	859	1062	705	658	814	828	751	1187	126	145	140	196	125	182
Ec-00_001400	22	14	155	137	111	150	277	166	204	233	255	975	1005	726	1536	517	354	371	338	495	494	382	279	604	662	795	981	605	532	1278	1296	1275	1463	887	2171	266	200	266	646	361	456
Ec-00_001410	814	661	2235	2769	2459	2996	3020	2565	2532	3675	3399	6451	7178	3880	8294	4006	3035	3198	3222	3354	3088	1536	1088	6089	4354	5280	6412	4435	6323	8625	8871	7835	7923	5729	8113	2188	2940	2705	4581	3383	6577
Ec-00_001420	34	21	327	607	469	537	761	775	296	429	288	1053	959	451	1502	348	330	263	283	354	336	298	268	920	1080	982	1225	887	1006	995	1105	910	870	731	903	261	300	206	381	341	550
Ec-00_001430	907	699	3154	3169	2536	1446	3102	4281	652	871	1046	5504	3755	1208	6428	753	3076	531	611	1245	1119	1045	648	913	695	3157	7358	662	957	6625	8463	4185	3529	3751	2789	204	3097	1861	1245	2511	1916
Ec-00_001440	2731	2189	1335	1697	1573	597	1189	1028	1103	1197	951	5913	4825	1742	4697	1720	1371	1594	1858	1386	1568	1928	1451	1574	1559	2280	4058	1440	1598	3315	3837	4145	4136	4604	2724	216	1703	918	808	1162	481
Ec-00_001450	102	93	302	213	169	510	596	308	615	723	418	2125	2693	1777	3094	972	411	823	935	971	1015	1109	909	2604	3334	1199	1169	2747	2776	1246	1139	2799	2927	1720	2874	684	568	392	478	345	271
Ec-00_001460	7699	6459	829	1409	2029	843	1117	1128	1149	955	847	2466	3726	1869	3240	853	657	731	869	743	869	685	550	965	982	920	896	825	862	1101	1245	1374	1728	1540	2191	270	244	470	580	854	1031
Ec-00_001470	1	1	0	2	1	0	0	3	0	0	0	0	1	0	0	1	0	0	0	0	0	0	0	0	0	0	0	0	0	0	0	0	0	0	0	0	0	0	0	0	0
Ec-00_001480	5	6	6	24	22	21	12	6	1	0	1	373	359	43	59	2	0	2	0	57	33	2	1	147	102	30	26	65	113	48	56	134	241	156	130	19	4	28	43	50	75
Ec-00_001490	60	46	257	300	168	280	398	422	132	160	150	563	576	231	580	162	198	132	146	171	166	186	167	320	305	739	996	234	245	718	925	534	427	358	568	120	234	83	113	126	102
Ec-00_001500	364	314	759	913	695	358	680	661	687	726	876	2668	2556	1831	4280	848	2043	582	539	621	543	1523	1172	854	840	1658	2646	851	925	3420	3440	3185	3182	3149	3857	266	3416	904	537	910	1228
Ec-00_001510	49	42	103	156	142	109	118	128	337	498	647	1699	1985	1557	2775	1151	870	1032	919	408	464	1365	1151	1589	2014	1198	977	1527	1589	2336	2240	1534	1347	1540	3475	425	546	354	400	397	343
Ec-00_001520	2	0	1	14	13	1	7	8	3	1	1	4	21	74	92	16	2	1	1	29	27	4	4	5	6	7	0	2	10	0	36	0	0	5	3	2	2	1	1	2	3
Ec-00_001530	8	2	48	79	48	101	141	95	53	56	110	388	356	219	623	120	89	134	137	200	201	99	75	305	400	271	340	316	270	304	325	381	384	292	466	103	107	83	121	88	114
Ec-00_001540	78	64	403	272	494	199	302	243	401	533	159	559	685	277	569	168	150	107	149	419	438	101	76	1030	590	940	1452	614	768	1167	1181	1115	1254	577	1294	242	465	457	784	390	667
Ec-00_001550	6039	4997	2091	2618	1654	1474	1361	944	885	1002	2183	1789	1900	1070	2173	855	431	761	817	883	1011	782	632	2114	2118	1352	1540	2087	2175	1458	1343	2254	2447	1107	3353	632	157	330	732	466	602
Ec-00_001560	45	37	13	34	27	5	5	14	1	7	12	212	323	122	400	3	4	1	2	107	60	1	1	98	89	88	108	49	102	344	317	230	446	553	926	14	12	51	87	127	129
Ec-00_001570	47	52	88	89	81	82	246	65	79	126	107	1415	1104	384	1236	176	115	79	99	282	239	135	108	307	329	868	1111	319	379	1548	1683	1578	1803	1901	1899	49	101	135	188	235	356
Ec-00_001580	12	15	1106	1785	1002	765	1305	1347	284	454	245	1607	879	406	1500	399	838	232	267	412	450	453	331	583	587	1602	2080	1016	656	2008	2279	655	533	1187	642	290	1134	418	504	652	985
Ec-00_001590	144	121	675	885	760	342	1113	1340	110	173	212	1637	1426	413	1206	418	689	317	295	294	314	526	392	233	198	589	813	217	192	641	737	838	811	517	658	55	213	170	207	220	313
Ec-00_001600	6	4	94	104	77	79	85	87	252	293	84	463	413	168	420	293	168	119	133	425	406	57	59	330	310	610	738	358	368	443	511	706	579	520	405	278	654	165	276	235	338
Ec-00_001610	7	2	35	25	21	66	70	32	64	55	18	113	109	45	95	27	23	19	33	48	44	20	15	81	82	52	68	56	52	67	79	60	113	71	81	17	35	29	24	24	36
Ec-00_001620	38	25	275	223	165	116	137	157	85	143	52	182	227	94	243	19	20	62	46	59	45	3	5	42	45	51	46	26	50	97	105	90	179	149	185	17	10	48	45	80	71
Ec-00_001625	0	1	49	44	30	72	86	49	33	66	29	55	112	70	149	11	3	25	15	14	23	10	11	94	131	36	41	65	77	47	28	47	59	57	73	15	22	8	17	10	8
Ec-00_001630	19	12	315	290	187	317	371	241	309	403	314	493	533	227	504	181	176	181	215	203	226	199	110	404	376	475	676	285	394	933	1135	621	535	448	702	187	264	186	215	197	154
Ec-00_001640	24	17	132	164	109	52	116	126	125	83	91	532	407	351	789	98	273	86	88	132	128	237	167	217	222	609	941	168	189	690	718	358	318	947	271	78	1155	159	123	181	122
Ec-00_001650	34	33	1	3	1	4	1	0	0	1	0	0	7	18	28	27	13	0	0	6	4	7	6	0	0	0	0	0	0	1	11	0	2	1	2	0	0	1	0	0	0
Ec-00_001670	587	495	876	537	246	255	246	234	398	1003	387	214	214	159	208	28	21	24	27	28	209	35	23	144	160	16	5	75	119	29	68	28	58	69	72	47	3	10	22	7	19
Ec-00_001680	5	11	20	17	12	59	61	33	17	24	11	146	202	62	131	29	4	24	23	39	26	17	15	182	156	48	49	64	124	70	59	120	169	141	91	24	17	21	31	37	40
Ec-00_001690	10	3	2	6	13	13	1	4	3	0	0	363	278	44	114	12	7	0	6	125	97	3	3	167	174	49	20	88	95	7	16	210	256	128	103	40	2	26	72	45	57
Ec-00_001700	2898	2209	308	459	741	366	337	313	185	391	235	1757	1149	313	1264	777	774	439	413	305	546	114	87	153	80	467	208	69	162	241	388	73	134	403	213	44	43	44	31	187	165
Ec-00_001710	9	7	393	542	359	242	440	437	219	277	184	557	514	217	627	266	261	137	143	259	232	276	170	277	210	708	1319	197	214	674	845	715	604	531	685	68	233	130	174	203	120
Ec-00_001720	89	88	436	412	295	513	1089	750	694	880	1142	6179	6425	3565	7334	1086	1442	1260	1365	2298	2170	2026	1715	1713	2350	2960	4779	2011	1753	6692	6061	5449	5676	5406	10047	459	989	1280	2160	1450	1759
Ec-00_001730	247	210	648	800	538	399	597	599	284	425	286	1059	1027	381	857	469	534	328	359	413	378	241	176	401	329	771	814	288	464	967	1105	1255	1143	824	777	181	484	235	287	340	354
Ec-00_001740	43	30	79	100	73	115	241	215	42	86	91	495	477	152	414	185	168	216	181	153	151	95	89	155	126	504	720	164	95	401	487	319	221	215	140	66	237	49	61	48	38
Ec-00_001750	154	127	1137	1488	1063	1816	3803	2997	1216	1203	1636	11439	11794	4833	12851	2009	2306	2623	2462	7443	6929	1894	1236	7021	5686	6747	13476	5038	4750	11884	12944	23807	17290	8976	5995	1199	5422	2945	5130	2996	2367
Ec-00_001760	62	45	135	182	96	166	235	144	270	354	251	386	373	184	448	242	206	273	374	319	332	104	84	315	332	294	380	341	309	488	570	484	471	262	458	173	222	143	319	238	337
Ec-00_001770	10	8	3	2	1	1	3	1	0	0	0	4	4	57	66	5	0	2	3	13	9	0	1	2	3	0	0	3	17	0	6	1	7	3	12	6	0	0	1	1	1
Ec-00_001780	1	0	1	2	2	3	0	2	1	3	1	20	13	7	21	1	0	7	6	8	20	3	3	12	11	6	8	7	19	10	10	15	14	12	17	2	5	3	6	1	4
Ec-00_001785	27	24	141	103	60	131	135	105	275	240	119	645	898	364	623	82	81	139	158	196	192	69	44	624	562	215	212	370	557	205	206	566	692	310	540	138	138	43	74	57	61
Ec-00_001790	11	4	7	8	5	4	7	7	0	5	0	1	2	1	1	0	0	0	0	0	0	15	15	67	64	0	2	102	74	2	0	2	0	1	2	1	0	0	5	1	4
Ec-00_001800	0	1	76	68	53	129	341	189	29	72	74	285	116	67	191	80	103	206	101	53	65	175	157	191	289	134	84	147	194	60	85	135	202	102	108	86	37	25	48	14	19
Ec-00_001810	1	0	12	7	4	18	28	7	9	24	3	57	45	23	79	16	9	17	13	19	16	11	4	37	44	24	30	21	32	42	52	62	39	37	43	14	10	6	2	7	1
Ec-00_001820	0	0	0	0	0	0	0	1	0	0	0	2	55	2	1	1	0	0	3	0	1	0	0	9	11	0	0	18	15	0	0	8	4	1	0	3	0	6	3	2	2
Ec-00_001850	1	3	15	13	7	12	37	9	8	10	10	260	243	141	309	38	13	34	30	96	71	189	147	329	470	260	164	183	356	197	230	487	679	241	449	128	41	69	128	47	90
Ec-00_001840	0	0	0	0	0	1	0	0	0	0	0	0	0	0	0	0	0	0	0	0	0	0	0	0	0	0	0	0	0	0	0	0	0	0	0	0	0	0	0	0	0
Ec-00_001860	4	2	21	51	27	40	270	114	140	319	526	1942	1355	392	848	1084	2489	914	514	116	107	3074	2289	62	121	112	40	172	164	174	177	265	590	166	54	5	1	141	231	49	154
Ec-00_001870	0	1	2	1	0	0	8	0	0	0	3	4473	2652	503	4036	131	48	5	13	210	1628	71	62	140	306	2145	1346	64	31	29	373	44	16	11	2	9	55	3	7	3	1
Ec-00_001880	0	0	0	0	1	0	1	0	0	0	0	0	0	0	0	0	0	0	0	0	0	0	0	0	0	0	0	0	0	0	0	0	0	0	0	0	0	0	0	0	0
Ec-00_001890	1123	913	575	598	412	261	443	230	28	31	50	96	132	37	47	0	0	0	0	0	0	16	9	55	27	70	6	35	47	14	33	18	39	31	23	0	0	1	0	1	0
Ec-00_001885	13	12	7120	8197	4153	5730	5046	2474	1	3	6	2	3	0	0	290	230	95	68	196	161	0	1	1	0	0	0	1	0	0	0	0	0	0	2	94	8	80	39	169	135
Ec-00_001900	110	76	529	414	379	794	2435	1050	59	131	963	7066	5241	2336	4062	838	2634	1633	1001	233	280	1794	1250	325	538	676	324	364	330	185	326	253	956	240	41	4	3	607	424	167	159
Ec-00_001910	0	0	0	1	1	1	5	1	0	0	0	27	29	12	19	11	4	7	9	1	3	5	1	3	0	0	1	1	3	0	0	1	1	2	0	0	0	0	0	0	0
Ec-00_001920	3	1	2	2	1	0	11	0	0	3	0	62	22	3	25	5	3	0	0	4	1	5	3	1	5	10	8	3	1	0	4	0	0	0	1	0	0	0	0	1	0
Ec-00_001930	15	13	347	666	351	217	395	430	125	192	113	866	619	208	726	154	221	94	141	187	208	229	204	318	399	762	1074	422	363	1126	1115	451	439	654	548	93	272	128	168	164	270
Ec-00_001940	23	26	936	1048	756	757	1969	1415	415	474	917	3465	2704	1446	4842	1122	1652	868	620	1171	1122	1119	730	1806	1622	2837	5620	1053	1341	3756	4499	3578	2762	3019	2083	453	1724	898	962	1293	1738
Ec-00_001950	90	64	1459	1391	1102	1158	1867	1621	1201	1874	1308	1378	1429	717	2132	1846	1531	1352	1166	1152	1128	599	385	1267	877	2998	3948	882	1045	2495	2822	1811	1534	1041	1266	800	981	668	907	979	1766
Ec-00_001960	51	36	1084	1246	1026	763	1896	1977	968	1347	1363	7566	7330	3914	11578	1595	3896	1850	1952	2982	2898	2128	1411	1692	1562	5372	9531	1518	1737	8824	10428	8019	6927	6776	6788	759	3861	2317	3024	2611	3023
Ec-00_001970	6	4	213	351	237	178	409	404	408	367	445	801	655	422	1316	401	417	301	343	261	367	458	372	731	850	831	741	804	745	562	671	697	554	734	595	328	662	195	279	487	430
Ec-00_001985	50	22	1391	1999	1216	1487	2173	2224	1787	1317	1570	3993	3419	2409	6499	1386	1293	890	986	845	1091	2399	2037	6079	6924	7634	6730	6408	6151	4923	5377	3332	2661	3577	3462	1781	2097	618	878	843	832
Ec-00_001980	0	0	449	717	487	542	788	837	0	2	2	1	3	1	4	46	17	18	18	16	14	1	1	1	2	2	0	0	0	0	0	0	0	1	0	27	70	39	49	48	145
Ec-00_001990	3	1	6	8	5	7	5	4	1	9	4	164	176	48	136	5	1	1	1	35	28	8	7	78	99	39	34	73	119	43	26	169	221	85	175	8	1	7	14	21	43
Ec-00_002000	107	100	453	542	355	356	517	454	533	539	704	2489	2645	1242	2426	637	634	593	601	816	857	644	538	1542	1189	1549	2234	1087	1517	1880	2174	3095	2670	1706	3026	340	806	497	796	463	589
Ec-00_002010	358	266	1785	2451	1680	1363	2962	2413	622	688	1360	4850	4995	2196	5589	1953	1276	1675	1525	1449	1431	1688	1309	3342	3662	2834	4524	2562	3113	3516	3859	4263	3857	2879	3268	654	1087	733	966	860	886
Ec-00_002020	7	10	72	65	54	49	65	70	97	103	103	209	230	124	253	149	101	122	124	104	136	99	76	183	196	185	132	193	189	114	168	276	214	201	182	157	119	29	63	34	35
Ec-00_002030	9	7	904	1313	802	543	668	1213	136	253	169	1090	627	257	1244	212	519	186	183	339	337	408	372	329	435	1436	2410	635	367	2067	2346	454	387	1066	829	133	428	290	431	446	493
Ec-00_002040	227	191	967	1352	828	1222	2329	1671	1476	1480	2252	13102	14630	8912	17270	2046	3007	2337	2574	4668	4605	3681	3020	6756	6807	7151	11931	6274	6372	15233	15516	17519	17309	14218	21302	1344	2816	4127	6967	4665	4072
Ec-00_002050	3770	2974	1810	1670	1256	1028	1962	1623	914	1364	1155	2551	3512	1393	3044	1301	988	1410	1349	1661	1485	1013	765	929	1032	1470	2328	936	950	2286	2549	3631	3566	2054	3816	501	459	659	1400	963	1296
Ec-00_002055	0	0	9	5	9	5	3	8	3	5	10	54	28	9	43	4	5	4	4	14	10	6	7	56	63	74	160	29	43	71	86	28	30	29	76	20	25	7	18	17	10
Ec-00_002060	18	18	754	1128	737	704	667	743	461	1044	641	1673	1669	520	1928	393	971	439	506	976	738	174	100	520	350	1875	3700	325	428	4918	5212	2633	2122	1962	2168	217	1531	762	888	1479	1878
Ec-00_002070	103	89	816	923	617	835	840	880	889	1458	1111	2571	2847	1610	3325	1191	1117	1045	1049	1317	1195	685	515	2534	1797	2227	2544	1280	2560	2443	2687	3101	3333	2100	3158	707	711	930	1458	1392	2950
Ec-00_002080	3	1	310	299	205	206	210	212	190	351	147	333	244	81	358	263	293	134	126	317	240	79	37	176	211	712	600	174	213	473	628	243	276	405	365	179	329	151	195	311	598
Ec-00_002090	22	14	272	387	181	466	1057	802	1609	1248	451	4035	2943	1040	4521	1278	2776	624	627	994	929	716	533	491	578	2329	4443	516	360	4738	6030	2628	2254	3352	2625	283	1135	1008	712	1355	1301
Ec-00_002100	1	1	19	29	10	18	39	22	8	17	13	84	77	51	110	31	23	20	21	19	22	19	18	71	108	76	123	82	80	87	77	72	71	67	81	36	23	8	17	16	17
Ec-00_002110	9	2	4	12	15	3	1	2	1	7	4	48	65	10	17	1	0	1	0	7	0	1	1	27	24	2	0	19	22	5	7	46	79	54	41	3	1	5	2	14	15
Ec-00_002120	0	0	10	9	13	24	8	6	0	0	0	1	0	0	0	5	2	1	3	0	4	0	0	0	0	0	0	0	0	0	0	0	0	0	0	1	5	1	1	2	2
Ec-00_002130	0	0	0	0	0	0	0	0	0	0	0	0	0	0	0	0	0	0	0	0	0	0	0	0	0	0	0	0	0	0	0	1	0	0	0	0	0	0	0	0	0
Ec-00_002140	13	15	169	184	113	83	150	149	115	180	148	251	180	65	285	100	153	101	109	104	112	72	40	157	106	191	272	137	173	374	458	214	248	226	205	45	177	91	131	91	233
Ec-00_002150	0	0	0	0	0	0	0	0	0	0	0	0	0	0	0	0	0	0	0	0	0	0	0	0	0	0	0	0	0	0	0	0	0	0	0	0	0	0	0	0	0
Ec-00_002160	8	8	99	106	59	60	107	118	31	47	96	500	412	257	692	119	210	90	94	123	95	154	148	82	128	351	640	102	84	706	833	349	260	358	409	49	167	110	143	151	150
Ec-00_002170	8	7	20	23	15	10	32	17	10	18	14	101	104	66	147	12	22	14	8	26	32	23	25	32	43	67	74	34	38	50	51	110	92	86	155	10	22	10	18	13	15
Ec-00_002180	0	0	4	6	2	2	2	4	0	1	0	2	2	1	5	0	0	0	0	2	3	0	0	1	1	2	5	0	4	2	2	3	5	5	5	2	0	0	0	0	0
Ec-00_002190	1	0	2	4	2	0	2	2	0	0	1	1	0	0	0	0	0	0	6	1	1	1	0	3	2	0	0	4	2	0	0	0	0	0	1	0	0	0	0	0	0
Ec-00_002200	1	0	0	0	0	0	0	0	0	0	0	0	0	0	0	0	0	0	0	0	0	0	0	0	1	0	0	1	4	0	0	1	0	0	0	0	0	1	1	0	0
Ec-00_002210	0	0	1	0	0	0	0	0	0	0	0	0	0	0	0	0	0	0	0	0	0	0	0	0	1	0	0	0	0	0	0	0	0	0	0	0	1	0	0	0	0
Ec-00_002220	0	0	71	69	23	20	38	44	0	6	5	24	35	1	173	40	2	33	41	6	48	19	13	325	350	49	54	267	362	53	4	83	70	38	16	118	39	9	11	7	0
Ec-00_002230	20	14	17	11	12	17	27	19	3	3	4	25	22	6	26	26	17	9	6	5	12	6	6	10	26	23	24	12	12	31	32	15	12	34	18	13	23	5	2	13	5
Ec-00_002240	0	0	1	3	1	2	2	2	2	4	3	27	26	4	20	0	0	0	1	0	0	0	1	12	2	0	0	10	11	0	0	44	35	26	30	0	0	0	1	2	3
Ec-00_002250	0	0	0	0	0	1	0	0	0	0	0	0	0	0	0	0	0	0	0	0	0	1	0	0	0	0	0	0	0	0	0	0	0	0	0	0	0	0	0	0	0
Ec-00_002260	0	1	1	1	0	0	1	0	0	0	0	2	0	0	0	0	0	0	0	0	0	1	2	0	0	1	0	0	2	0	0	0	0	0	0	0	0	0	0	0	0
Ec-00_002270	0	0	0	0	0	2	1	0	0	2	0	1	1	0	0	0	0	0	0	0	0	0	0	0	2	0	0	0	1	0	1	2	0	0	0	0	0	0	0	0	0
Ec-00_002280	119	90	17	37	20	41	54	12	15	13	11	2246	1773	1205	4645	62	73	39	35	762	867	362	353	2409	1967	1104	2478	1837	2131	5588	5590	11454	6986	4703	8982	438	564	834	2301	1219	2295
Ec-00_002290	0	0	3	5	2	3	1	5	0	0	0	1	0	1	0	1	0	12	5	10	21	0	0	0	0	0	0	0	0	0	0	0	0	0	0	11	0	116	154	21	37
Ec-00_002300	0	0	0	1	1	4	1	1	0	0	0	0	0	0	0	0	0	0	0	0	0	0	0	0	0	0	0	0	0	0	0	0	0	0	0	0	0	0	0	0	0
Ec-00_002310	0	0	0	0	1	1	0	2	0	0	0	8	0	0	0	0	0	0	0	0	0	15	0	7	2	12	1	1	3	0	0	1	5	0	45	0	13	0	1	0	0
Ec-00_002320	0	0	6	4	7	2	14	4	3	2	1	2	1	2	4	1	3	0	1	0	1	3	1	3	2	0	0	2	5	1	1	4	1	5	3	0	1	2	26	0	0
Ec-00_002330	2	4	24	47	32	16	31	30	22	25	37	95	82	47	156	34	31	22	31	42	55	34	22	43	48	62	60	36	72	84	89	89	94	114	149	19	31	24	52	51	97
Ec-00_002340	0	0	0	0	0	0	0	0	0	0	0	0	0	0	0	0	0	0	0	0	0	0	0	1	0	0	0	0	0	0	0	0	0	0	0	0	0	0	0	1	0
Ec-00_002350	3	1	2	2	0	0	3	1	0	1	1	0	1	2	3	0	0	0	0	0	0	1	2	4	2	0	0	3	4	0	0	0	0	4	1	0	0	0	0	0	1
Ec-00_002360	1	1	24	25	15	29	25	18	7	42	11	57	35	14	36	12	13	15	13	19	21	6	5	17	7	22	22	2	13	36	49	41	56	37	49	12	7	13	23	24	24
Ec-00_002370	0	0	0	0	0	0	0	0	0	1	0	0	0	0	0	0	0	0	0	0	0	0	0	9	1	0	0	0	0	0	0	1	0	0	1	0	0	0	0	1	0
Ec-00_002380	0	0	0	2	0	0	0	0	0	0	0	19	17	3	5	0	0	0	0	0	2	0	0	7	2	0	0	6	4	0	1	8	12	4	7	0	0	1	1	0	0
Ec-00_002390	0	0	1	1	0	0	0	0	2	1	4	1	1	0	2	0	0	1	0	0	0	0	0	0	1	0	0	3	2	0	2	0	1	1	2	1	0	1	0	3	1
Ec-00_002400	0	0	3	5	4	4	10	10	0	0	3	2	7	1	15	1	1	0	0	0	1	3	3	5	4	1	2	5	5	4	1	4	1	10	4	0	0	5	1	2	5
Ec-00_002410	0	0	0	0	0	0	0	0	0	0	0	0	0	0	0	0	0	0	0	0	0	0	0	0	0	0	0	0	0	0	0	0	0	0	0	0	0	0	0	0	0
Ec-00_002420	0	0	21	39	16	16	14	22	8	8	5	2	0	2	2	0	2	1	0	0	0	1	0	5	12	1	2	6	6	0	1	1	0	2	4	0	1	1	0	0	1
Ec-00_002430	1	0	1	1	2	1	0	0	1	0	0	0	0	0	0	0	0	0	0	0	0	0	1	0	1	0	0	1	0	0	0	0	0	0	0	0	0	0	0	0	0
Ec-00_002440	0	0	0	0	0	0	0	0	0	0	1	0	1	0	0	0	0	0	0	0	0	0	0	0	0	0	0	0	0	0	0	0	0	1	0	0	0	0	1	0	0
Ec-00_002450	0	0	0	0	1	0	0	0	0	0	0	0	0	0	0	0	0	0	0	0	0	0	0	0	0	0	0	1	0	0	0	0	0	0	0	0	0	0	0	0	0
Ec-00_002460	0	0	0	0	0	2	2	0	0	0	0	0	0	0	0	0	0	0	0	0	0	0	0	0	0	0	0	0	0	0	0	0	0	0	0	0	0	0	0	0	0
Ec-00_002470	0	2	8	15	5	9	33	18	12	23	17	162	104	81	140	38	32	51	35	35	35	59	33	44	59	14	43	30	38	38	29	90	95	81	85	11	15	14	25	10	12
Ec-00_002480	0	0	12	10	5	10	31	14	142	140	32	42	51	0	5	0	0	22	4	6	5	1	0	144	177	1	26	15	6	4	33	0	3	13	4	5	8	0	0	7	9
Ec-00_002490	1	0	72	87	71	92	104	54	74	81	86	80	73	41	87	31	18	27	25	28	25	15	18	110	131	105	70	105	124	55	73	67	67	68	61	22	35	7	18	10	15
Ec-00_002500	0	0	0	0	0	1	1	0	0	0	0	0	0	0	0	0	0	0	0	0	0	0	0	1	0	0	0	0	0	0	0	0	0	0	0	0	0	0	0	0	0
Ec-00_002510	0	0	0	1	1	1	0	2	0	0	0	1	0	1	0	0	0	0	0	0	0	0	0	0	0	0	0	0	0	0	0	0	0	0	0	0	0	0	0	0	0
Ec-00_002520	12	12	7	14	20	23	37	7	16	26	15	18	19	21	21	1	3	7	9	11	20	6	7	0	0	0	0	0	0	0	0	37	37	49	41	12	6	0	0	0	0
Ec-00_002530	3	5	83	94	60	49	89	95	30	34	56	399	384	202	548	36	115	57	46	78	101	107	99	68	89	205	307	88	59	331	383	295	212	308	405	45	82	70	103	94	78
Ec-00_002540	14	1	9	5	14	1	4	8	38	66	31	2112	2671	748	1034	5	3	28	18	34	72	7	7	243	276	27	21	249	295	60	15	806	5330	55	4217	21	0	544	684	88	183
Ec-00_002550	0	0	12621	32407	25604	65207	50778	16398	1	2	0	7	3	33	19	27	42	110	114	81	152	0	0	2	2	0	0	0	1	0	0	0	1	3	0	2	15	7	4	20	38
Ec-00_002560	0	0	0	0	0	0	0	0	0	0	0	0	0	0	0	0	0	0	1	1	0	0	0	0	0	0	0	0	0	0	0	0	0	0	0	0	0	0	0	0	0
Ec-00_002570	0	0	1	0	0	1	1	0	0	0	0	2	3	0	2	0	0	0	0	1	0	0	0	0	1	0	0	1	1	0	0	2	1	0	2	0	0	0	0	0	0
Ec-00_002580	0	0	0	0	0	0	0	0	0	0	0	1	0	0	0	0	0	0	0	0	0	0	0	0	0	0	0	1	0	1	0	0	0	0	0	0	0	0	0	0	0
Ec-00_002590	0	0	1	1	0	1	2	2	4	5	6	8	5	1	9	0	1	1	0	0	0	0	1	14	3	0	0	9	17	0	0	20	9	6	7	0	0	0	1	0	0
Ec-00_002600	0	0	0	0	0	0	0	0	0	0	0	0	0	0	0	0	1	0	0	0	0	0	0	0	0	0	0	0	1	0	0	0	0	0	0	0	0	0	0	0	0
Ec-00_002610	56	44	173	298	181	120	221	164	60	53	98	269	240	232	316	83	96	78	77	59	103	46	71	523	508	110	64	442	526	101	85	185	162	191	131	125	106	65	83	74	52
Ec-00_002620	8	10	0	13	5	1	1	3	0	0	0	51	22	1	7	0	0	1	0	91	77	3	3	58	73	17	52	234	126	120	86	1193	296	169	796	1224	358	12	60	31	70
Ec-00_002630	32	29	150	262	151	201	223	166	93	126	99	410	410	182	520	90	80	81	106	95	123	111	76	152	193	133	167	165	169	208	289	258	209	266	339	54	56	52	145	86	266
Ec-00_002640	1	1	77	106	52	44	115	108	37	26	26	561	254	109	562	26	178	25	51	59	80	96	70	93	145	239	286	127	123	293	269	130	130	384	257	28	615	88	67	110	58
Ec-00_002650	0	0	0	0	2	0	6	2	3	3	2	18	21	6	10	0	0	3	2	5	4	5	3	1	2	2	2	1	2	0	0	18	12	16	7	1	0	0	0	0	0
Ec-00_002660	0	0	12	12	4	8	3	3	0	0	0	0	1	0	0	0	0	0	0	0	0	0	0	0	0	0	0	0	0	0	0	2	0	0	2	1	0	0	0	0	0
Ec-00_002670	0	0	0	0	1	0	0	0	0	0	0	0	0	0	0	0	0	0	0	0	0	0	0	0	2	0	0	0	0	0	0	0	0	0	1	0	0	0	0	0	0
Ec-00_002680	0	0	0	1	0	0	0	0	0	0	0	0	0	0	0	0	0	0	0	0	0	0	0	2	1	0	1	1	0	0	0	1	0	0	0	0	1	0	0	0	0
Ec-00_002690	0	0	0	0	0	0	0	0	0	0	0	75	0	0	0	0	0	0	0	0	0	0	1	1	0	0	0	0	1	0	0	0	1	0	0	0	0	0	0	0	0
Ec-00_002700	16	15	102	109	66	100	209	113	98	90	183	772	478	472	1604	142	392	167	131	160	141	267	152	304	238	481	764	158	279	727	770	696	576	969	914	61	528	151	69	233	181
Ec-00_002710	74	39	1029	603	1174	577	1022	693	270	195	196	89	98	13	61	192	84	112	152	79	90	20	9	152	62	74	57	142	100	79	104	74	67	57	48	100	86	23	34	49	75
Ec-00_002720	1	4	1	2	1	4	2	0	2	5	11	20	15	11	50	0	1	0	0	0	0	2	0	4	4	0	0	7	10	0	0	16	15	17	12	0	0	0	0	0	2
Ec-00_002730	0	0	2	1	0	3	3	2	2	10	7	10	9	1	8	0	0	2	0	0	0	0	2	5	0	0	0	2	2	0	0	15	13	9	5	0	0	0	0	0	0
Ec-00_002740	0	0	3	3	1	0	2	1	8	2	2	0	1	1	0	1	0	1	0	0	0	0	1	5	8	0	0	3	3	0	0	2	0	1	1	0	0	0	0	0	1
Ec-00_002750	0	0	0	0	1	0	0	0	0	0	0	0	0	0	0	0	0	0	0	0	0	0	0	0	0	0	0	0	0	0	0	0	0	1	0	0	0	0	0	0	0
Ec-00_002760	10	8	488	1084	554	588	1283	1003	174	332	420	1914	2099	1043	1908	565	355	306	317	315	355	543	411	1104	1432	1548	1656	1271	1090	1458	1608	1539	1408	1402	1954	173	256	191	329	380	367
Ec-00_002770	13	15	45	31	21	26	30	45	38	73	63	256	245	131	249	72	119	103	89	90	98	66	54	76	83	79	126	47	63	146	176	151	186	182	333	36	54	47	65	52	34
Ec-00_002780	0	0	0	0	0	0	5	0	0	0	0	0	0	0	0	0	0	0	0	1	0	0	0	2	0	0	0	1	1	0	0	0	1	2	0	0	0	0	0	1	0
Ec-00_002790	0	0	0	0	0	0	0	0	0	2	0	1	7	0	5	0	0	0	0	0	0	0	0	4	3	0	0	1	4	0	0	1	6	2	3	0	0	0	0	0	0
Ec-00_002800	0	1	37	42	29	23	44	31	53	86	70	79	73	31	93	25	50	50	31	60	63	25	12	55	46	99	160	50	57	206	230	96	71	55	94	32	108	74	126	61	190
Ec-00_002810	0	0	0	0	0	0	1	0	0	0	0	0	0	0	0	0	0	0	0	0	0	0	0	0	0	0	0	0	0	0	0	0	0	0	0	0	0	0	0	1	0
Ec-00_002820	1	0	29	43	15	23	41	42	2	6	9	19	21	14	6	1	2	1	6	2	2	7	2	14	16	6	4	13	18	12	4	14	11	8	9	1	2	0	0	1	0
Ec-00_002830	0	0	0	0	0	0	1	0	0	0	0	0	0	0	0	0	0	0	0	0	0	0	0	0	0	0	0	0	0	0	0	0	1	0	0	0	0	0	0	0	0
Ec-00_002840	0	0	1	0	0	7	2	0	0	1	1	1	2	2	0	4	0	1	4	2	1	0	0	2	0	1	0	0	2	0	1	6	2	1	0	0	2	0	0	0	1
Ec-00_002850	0	0	0	13	2	2	1	0	0	0	0	1	2	0	4	1	4	2	1	14	19	2	0	11	4	0	3	11	22	1	1	41	40	13	55	13	14	3	11	8	3
Ec-00_002860	0	0	0	0	0	1	0	0	0	0	1	0	1	0	0	0	0	0	0	0	0	0	0	1	2	0	0	1	0	0	0	3	0	0	4	0	0	0	0	0	0
Ec-00_002870	0	0	0	0	0	0	1	0	0	0	0	0	0	0	0	0	0	0	0	0	0	0	0	0	0	0	0	0	0	0	0	0	0	0	0	0	0	0	0	0	0
Ec-00_002880	1	1	18	15	18	17	23	12	15	19	12	38	35	27	61	25	30	16	18	12	17	6	11	11	22	30	30	23	19	22	26	23	39	40	33	15	20	9	11	14	10
Ec-00_002890	0	0	0	0	0	0	0	0	0	0	0	0	0	0	0	0	0	0	0	0	0	0	0	0	0	0	0	0	0	0	0	0	0	0	0	0	0	0	0	0	0
Ec-00_002900	0	0	0	1	4	2	3	2	4	5	1	26	22	11	20	5	1	0	2	0	0	0	0	8	16	1	0	14	8	0	0	10	3	11	17	0	2	0	2	0	0
Ec-00_002910	0	30	0	3	1	1	3	1	1	1	3	5	4	3	6	0	0	0	0	1	0	2	0	13	2	0	0	3	1	0	1	7	5	3	6	0	1	0	0	1	1
Ec-00_002920	0	0	0	0	0	0	1	1	0	0	0	0	0	0	0	0	0	0	0	0	0	0	0	0	0	0	0	0	0	0	0	0	0	0	0	0	0	0	0	0	0
Ec-00_002930	0	0	1	0	0	0	2	0	0	0	0	0	0	1	2	0	2	0	0	0	0	0	0	0	0	0	1	0	0	0	0	1	0	0	0	0	0	0	0	1	1
Ec-00_002940	12	12	105	64	55	63	172	123	41	99	120	1057	1092	586	1260	87	275	212	201	341	288	244	183	77	27	317	1044	43	54	782	1008	1158	1119	708	964	16	180	213	202	223	121
Ec-00_002950	0	0	1	1	1	2	2	2	0	0	0	1	2	1	2	0	0	1	0	0	0	0	1	9	4	1	0	2	6	0	0	2	2	0	0	0	0	0	0	0	0
Ec-00_002960	17	13	17	34	32	15	19	17	7	5	6	7	2	2	2	1	2	2	1	1	1	0	3	13	14	0	0	18	16	0	0	5	2	2	6	2	1	1	0	0	1
Ec-00_002970	0	0	1	1	0	0	0	0	0	0	0	1	0	0	0	0	0	0	0	0	0	0	0	1	0	0	0	0	1	0	0	0	0	0	0	0	0	0	0	0	0
Ec-00_002990	93	69	136274	107684	167777	63726	193983	164955	138	1604	1014	503	877	651	2031	22	48	421	136	106	390	676	391	2154	4816	3	0	1550	9803	0	0	182	164	638	469	9	32	11	4	17	32
Ec-00_003000	0	0	3	5	3	2	2	3	2	1	0	0	0	1	1	0	0	0	0	0	0	0	0	5	5	0	0	3	2	0	0	1	2	1	1	0	0	0	0	0	0
Ec-00_003010	21	1	4	3	3	2	7	1	4	1	4	106	23	7	14	0	0	1	0	2	1	5	10	20	11	2	6	18	24	14	14	26	31	11	15	1	1	9	10	5	12
Ec-00_003030	0	0	12	22	16	13	9	8	1	1	2	15	19	4	13	0	0	1	0	0	0	0	0	2	1	0	2	3	1	0	0	8	15	6	4	1	0	1	0	14	0
Ec-00_003040	0	0	1	1	0	0	1	1	0	0	0	0	0	0	0	0	0	0	0	0	0	0	0	0	19	0	0	0	0	0	0	0	0	0	0	0	0	0	0	0	0
Ec-00_003050	0	0	0	1	0	2	8	0	0	0	0	0	0	0	0	0	0	0	1	0	0	0	0	0	0	0	0	0	0	0	0	0	0	0	0	0	0	0	0	1	0
Ec-00_003060	0	0	0	1	2	0	0	1	0	0	0	11	5	2	9	0	0	0	0	0	0	0	0	2	1	0	1	1	3	0	0	4	6	2	4	0	0	0	0	0	0
Ec-00_003070	0	0	19	15	11	14	8	7	0	0	0	0	0	0	0	13	2	8	11	6	10	0	0	0	0	0	0	0	0	0	0	0	0	0	0	6	2	0	2	3	6
Ec-00_003080	0	0	0	1	0	0	1	0	0	0	0	0	0	0	0	1	0	0	0	0	0	0	0	0	0	0	0	1	0	0	0	0	0	0	0	0	0	0	0	0	0
Ec-00_003090	0	0	1	1	1	0	1	0	0	0	0	0	0	0	0	1	2	5	4	11	11	0	0	0	0	0	1	0	0	0	0	0	2	6	0	9	9	0	6	4	4
Ec-00_003110	793	806	378115	381920	488865	208335	605288	490434	1545	6340	6706	32676	22027	33412	84402	4531	5518	21429	13634	11713	14890	5785	4689	16338	30657	2557	2473	20973	37252	1372	2002	6954	8110	16552	15773	680	3539	1055	867	1833	1451
Ec-00_003120	0	0	50	40	38	31	61	42	35	85	48	19	9	7	31	56	42	45	47	39	35	9	2	15	20	21	20	16	27	16	32	16	19	30	17	22	40	12	22	18	21
Ec-00_003130	14	9	0	3	5	1	1	4	0	0	0	2	0	0	0	1	0	0	0	0	0	0	0	3	1	0	0	4	1	0	0	0	0	2	3	0	0	0	0	0	0
Ec-00_003140	1	3	22	29	12	16	17	5	2	2	0	34	27	3	9	0	0	1	0	0	0	0	1	24	44	2	0	54	34	0	1	3	5	7	1	0	0	0	0	0	0
Ec-00_003150	0	0	10	6	2	4	4	2	4	1	6	0	0	1	1	0	0	0	0	0	0	0	0	0	0	0	0	2	1	0	0	0	0	0	0	0	0	0	0	0	0
Ec-00_003160	3	3	52	71	32	36	62	61	6	23	33	269	266	148	432	28	92	45	30	58	62	66	51	42	44	203	427	41	36	488	593	210	174	181	244	9	81	64	92	80	39
Ec-00_003170	0	0	25	39	28	31	50	29	4	5	19	28	46	8	19	10	30	5	8	5	6	11	6	16	7	26	25	20	10	19	34	8	5	6	0	0	2	4	3	1	1
Ec-00_003180	0	0	0	0	0	1	1	0	0	0	0	2	0	2	0	0	0	0	0	1	0	0	0	1	0	0	0	0	0	0	0	1	1	0	0	0	0	0	0	0	0
Ec-00_003190	0	0	0	0	0	0	0	0	0	0	0	0	0	0	0	0	0	0	0	0	0	0	0	0	0	0	0	0	0	0	0	0	0	0	0	0	0	0	0	0	0
Ec-00_003200	0	0	1	0	1	0	1	1	0	0	2	0	0	0	1	0	0	0	0	0	0	0	0	2	3	0	0	0	0	0	0	0	0	0	0	0	0	0	0	0	0
Ec-00_003210	0	0	0	0	0	0	0	0	1	1	6	0	1	0	1	0	0	0	0	0	0	0	0	0	1	0	1	0	0	1	0	1	2	2	1	0	0	0	0	0	0
Ec-00_003220	0	0	0	0	0	0	0	0	1	2	0	0	0	0	1	0	0	0	0	0	0	0	0	0	0	0	0	1	0	0	0	1	0	0	0	0	0	0	0	0	0
Ec-00_003230	0	0	0	0	0	0	0	0	0	0	0	0	0	0	0	0	0	0	0	0	0	0	0	0	0	0	0	0	0	0	0	0	0	0	0	0	0	0	0	0	0
Ec-00_003240	0	0	1	0	0	0	0	0	0	0	0	0	0	0	0	0	0	0	0	0	0	0	0	0	1	0	0	0	0	0	0	0	0	0	0	0	0	0	0	0	0
Ec-00_003250	5	7	119	144	110	39	137	92	20	9	11	328	241	160	295	61	63	55	67	70	78	1	5	62	87	1	3	30	24	1	1	110	123	126	114	20	46	32	79	122	115
Ec-00_003260	4	3	258	362	228	141	218	235	413	543	668	296	140	78	335	695	593	439	390	336	344	196	106	369	282	524	531	360	408	693	859	158	199	221	248	463	486	300	451	349	807
Ec-00_003265	69	63	379	426	281	280	345	246	228	260	177	1037	773	375	995	324	204	147	173	394	385	306	213	963	987	753	1020	1093	1028	922	875	1057	1180	997	1390	273	315	205	290	253	217
Ec-00_003270	889	758	598	578	354	565	535	310	542	579	221	852	849	346	723	288	295	216	262	436	409	266	205	667	575	656	727	624	639	823	841	906	1027	637	979	294	557	258	304	313	354
Ec-00_003280	588	460	1099	796	734	643	816	594	989	1160	517	959	1014	526	1194	739	518	759	825	958	796	298	178	791	718	538	612	556	854	671	692	1373	1916	763	2022	356	641	369	926	504	974
Ec-00_003285	23	12	5371	4359	2989	4014	3499	3194	26	53	11	19	19	18	33	2563	1439	3007	3049	2515	2846	8	4	27	50	8	1	27	18	3	1	25	33	13	39	3719	2027	1444	3104	1771	1787
Ec-00_003290	874	629	750	573	565	590	669	395	444	540	766	769	901	304	714	416	301	571	570	751	661	272	141	458	253	581	1132	273	353	887	880	1440	1345	709	1155	153	433	315	565	406	485
Ec-00_003300	46	69	177	127	80	115	72	134	76	143	88	1433	1230	342	560	92	65	50	67	363	310	38	36	983	785	168	175	597	669	334	344	785	1011	618	612	124	42	162	274	206	299
Ec-00_003310	3	6	1	4	5	3	1	1	0	0	1	212	220	32	114	1	7	1	4	115	83	1	3	67	65	24	41	53	71	33	35	181	307	92	139	23	2	13	24	35	32
Ec-00_003320	57	46	37	76	60	46	159	47	38	77	41	272	315	139	380	290	166	157	111	340	250	47	33	291	197	288	349	149	332	369	412	351	424	328	296	85	67	122	180	355	595
Ec-00_003330	9	13	355	508	333	255	562	561	124	149	251	475	402	294	761	170	229	159	215	202	271	193	125	746	389	836	1371	498	826	934	1206	424	391	265	392	116	110	157	316	198	353
Ec-00_003340	17	14	759	527	629	712	1021	634	83	98	31	366	605	331	622	110	53	191	193	231	237	120	92	234	359	388	399	313	205	341	417	591	431	390	423	134	52	37	81	62	32
Ec-00_003350	171	143	378	393	232	671	658	387	127	210	92	1057	954	366	714	123	58	428	472	406	485	179	102	83	148	245	368	125	92	206	213	1053	1774	425	2010	339	85	34	49	39	36
Ec-00_003360	10	9	247	304	210	154	338	292	116	181	94	451	408	189	514	150	161	141	148	191	206	178	137	137	184	479	854	175	171	826	895	351	319	338	426	90	142	125	190	171	188
Ec-00_003370	117	92	566	639	386	527	1353	604	813	837	1488	2376	2402	1566	3358	1555	1874	1536	1210	1148	1146	1653	1142	934	760	2920	5509	644	702	3786	4116	1977	1990	1974	2520	222	1447	759	794	846	826
Ec-00_003380	47	33	338	354	304	248	398	304	119	193	222	561	560	367	746	263	228	293	286	275	288	119	95	277	247	397	422	302	344	854	849	648	670	467	602	165	179	245	351	263	458
Ec-00_003390	482	383	180	336	253	129	179	160	256	352	179	521	650	373	620	464	290	377	326	128	152	380	266	349	305	100	139	335	436	312	268	564	757	275	1150	56	88	152	311	115	196
Ec-00_003400	274	183	111	149	161	48	77	68	59	79	81	200	201	171	327	82	24	125	83	150	162	114	92	687	650	34	46	741	779	208	139	526	703	367	1479	148	44	221	765	293	517
Ec-00_003410	212	134	1194	1501	962	1111	2239	1478	1357	1764	1759	5879	5350	2812	7292	2663	1735	1927	1861	1898	2158	1920	1298	3408	3183	3585	4666	2666	2909	4293	4163	5419	5155	3893	4951	875	1837	707	1215	1095	1387
Ec-00_003420	264	227	749	1233	547	1221	1426	983	688	1238	611	3529	3681	1348	3571	1586	888	1207	1224	1158	1414	1362	1030	3020	3674	2425	2612	3820	3719	2338	2314	2974	2909	3017	3617	636	668	438	589	519	475
Ec-00_003430	38	43	344	326	254	292	333	286	364	394	258	1170	1388	656	1275	569	556	582	909	714	1001	415	330	449	664	816	1067	710	612	1614	1494	1172	1203	1018	2124	1662	561	710	1169	561	882
Ec-00_003440	21	13	5	4	3	12	12	7	33	45	159	296	1181	670	960	133	66	313	315	89	82	15	10	1297	1601	198	149	2162	3178	487	376	215	400	167	191	95	14	455	869	311	508
Ec-00_003450	0	0	0	1	0	0	0	1	0	0	0	0	1	0	0	8	0	13	8	0	4	0	0	0	0	0	0	0	0	0	0	0	2	0	0	2	3	23	52	13	27
Ec-00_003460	68	61	95	98	67	145	125	110	59	93	56	264	307	202	491	55	60	78	79	154	157	79	61	166	216	223	259	161	153	273	280	489	359	284	359	53	104	52	70	49	67
Ec-00_003470	79	73	285	233	301	125	138	188	178	211	246	335	306	173	246	98	69	149	181	88	84	93	58	299	264	45	52	281	269	134	122	224	374	215	292	157	103	130	219	103	149
Ec-00_003480	26	28	239	263	181	147	210	213	264	376	180	210	202	73	225	236	183	115	127	161	163	65	66	185	167	125	152	133	187	191	180	192	193	164	264	113	105	135	186	195	303
Ec-00_003490	122	115	613	703	442	455	710	539	494	483	419	1693	1476	677	1929	862	670	703	740	824	801	587	452	969	1091	1168	1534	1079	1078	1529	1643	1455	1328	1257	1680	478	610	347	610	480	918
Ec-00_003500	144	102	735	843	640	681	1078	727	1464	1602	1408	1765	1841	957	2219	1000	716	1419	1549	1251	1298	804	564	3479	1488	1267	1642	1251	2214	1493	1649	2507	2518	1087	2576	645	480	383	900	542	985
Ec-00_003510	14	10	0	4	3	2	5	1	0	3	1	16	60	233	343	13	2	2	2	69	82	16	3	1	7	2	3	3	23	0	45	2	2	1	4	0	0	2	1	0	0
Ec-00_003520	9	9	64	61	41	109	142	116	54	64	57	442	489	219	439	92	60	80	86	152	149	74	82	338	340	236	359	192	195	342	340	411	356	397	444	79	89	74	97	93	76
Ec-00_003530	174	144	381	404	239	308	482	376	337	384	291	1253	1087	681	1234	451	346	286	320	371	421	389	288	895	830	552	714	1034	1043	971	1051	891	1024	808	1139	216	216	304	453	289	373
Ec-00_003540	7	7	226	201	150	124	227	157	144	260	147	256	207	74	262	112	143	128	146	172	168	42	35	83	87	268	310	122	143	355	383	213	179	174	144	107	160	88	127	106	200
Ec-00_003550	2	3	161	187	112	257	217	127	65	84	42	92	70	32	83	255	150	202	198	129	169	18	22	80	69	92	69	73	100	72	71	76	66	54	40	271	133	60	110	60	169
Ec-00_003560	26	19	220	241	193	168	403	310	285	326	359	2142	2721	1800	2897	675	571	709	713	581	629	617	538	565	744	1277	1398	639	558	1689	1782	1806	1886	1354	2120	213	360	390	692	370	565
Ec-00_003570	2	6	21	26	18	20	43	29	8	24	17	122	193	166	226	72	71	76	89	100	111	77	38	36	25	107	136	10	23	187	193	123	153	90	190	11	35	34	34	24	41
Ec-00_003580	0	0	0	0	0	0	0	0	0	0	0	74	63	31	79	4	9	5	15	3	13	1	0	0	1	4	1	2	0	0	2	5	2	5	0	0	1	0	0	0	0
Ec-00_003590	0	0	0	0	0	0	0	0	0	0	0	0	0	0	0	0	0	0	0	0	0	0	0	0	0	0	0	0	0	0	0	0	0	0	0	0	0	0	0	0	0
Ec-00_003600	0	0	0	0	0	0	0	0	0	0	0	0	0	0	0	0	0	0	0	0	0	0	0	0	0	0	0	0	0	0	0	0	0	0	0	0	0	0	0	0	0
Ec-00_003610	0	0	1	0	0	1	1	1	1	1	0	0	1	0	0	0	0	1	0	0	0	1	0	7	4	0	0	1	0	0	0	0	0	0	0	0	1	0	0	0	0
Ec-00_003620	0	1	9	27	4	31	33	12	10	9	7	94	104	42	94	35	14	8	4	12	18	17	15	0	0	0	0	1	0	0	0	47	32	172	50	5	3	0	0	0	0
Ec-00_003630	0	0	0	1	1	3	0	0	0	0	0	0	0	0	0	0	0	0	0	0	0	0	0	0	0	0	0	0	0	0	0	0	0	0	0	0	0	0	0	0	0
Ec-00_003640	0	0	0	1	0	0	1	0	0	0	0	9	5	0	21	0	2	1	0	0	0	1	2	0	2	0	0	2	2	0	0	3	1	2	1	0	0	0	0	0	0
Ec-00_003650	66	27	171	319	179	142	256	113	117	147	175	197	80	115	301	196	107	121	95	52	56	198	112	5	2	0	1	37	19	0	0	111	136	65	100	44	57	0	0	0	0
Ec-00_003660	43	29	82	121	48	48	84	53	74	102	40	152	110	26	114	48	24	32	57	30	44	44	28	7	13	10	4	11	6	2	3	89	88	98	36	33	26	0	0	0	0
Ec-00_003665	18	17	4	9	7	8	7	11	0	1	1	2	5	0	86	4	1	3	1	173	108	6	3	756	749	131	154	821	948	285	268	1287	852	462	654	324	48	103	156	50	118
Ec-00_003670	0	0	0	0	3	0	0	0	0	0	0	0	0	0	0	0	0	0	0	4	1	0	0	3	0	2	2	6	4	4	3	12	3	2	2	3	0	2	2	1	1
Ec-00_003675	18	9	13	24	12	146	66	11	4	5	3	11	4	3	23	0	0	1	7	211	180	0	0	141	144	105	425	102	151	373	305	974	647	213	871	153	128	59	124	91	69
Ec-00_003680	1	0	0	2	1	9	2	0	0	1	0	0	0	0	3	0	0	0	1	4	7	0	0	3	8	8	53	2	2	69	28	99	59	17	61	6	7	4	3	3	6
Ec-00_003690	99	89	2	36	15	93	98	29	67	122	28	33	17	0	549	3	1	38	54	2598	1846	0	0	3217	3614	2815	6173	2869	3361	9181	9200	11192	9241	5036	9579	1919	1360	1655	3105	1667	1217
Ec-00_003695	2	0	5	5	3	18	15	12	6	7	2	2	1	0	5	0	0	3	1	78	59	0	0	116	94	168	361	97	92	243	236	298	165	117	240	87	69	49	61	31	23
Ec-00_003700	0	3	1	2	4	2	5	8	4	8	0	1	0	0	7	0	0	1	2	65	45	0	0	40	29	99	325	29	26	235	301	299	148	75	159	15	39	20	33	15	13
Ec-00_003710	0	0	0	1	1	0	1	1	0	4	0	0	0	0	2	0	0	0	0	2	3	1	1	24	30	2	4	24	28	8	7	28	20	18	32	6	0	5	9	2	0
Ec-00_003720	2	0	0	0	0	0	1	0	0	0	0	0	0	0	5	1	0	1	0	22	16	0	0	19	36	26	21	45	31	53	47	97	65	55	38	38	11	11	9	3	14
Ec-00_003730	2	2	1	1	0	2	3	0	1	0	0	1	1	0	28	0	1	0	2	52	63	0	0	333	313	28	45	343	538	236	212	1017	952	390	469	188	25	98	154	75	77
Ec-00_003740	1	0	0	0	0	1	3	0	0	0	0	0	0	0	9	0	0	1	0	36	26	0	1	151	151	125	126	125	126	138	112	67	77	52	82	40	32	23	33	14	19
Ec-00_003750	0	0	0	0	0	0	0	0	0	0	0	6	0	0	9	0	0	0	0	1	0	0	0	0	0	0	0	0	0	0	0	0	0	0	3	2	0	0	0	0	0
Ec-00_003760	0	0	0	2	0	0	0	0	0	0	0	0	0	0	0	7	3	20	24	3	10	0	0	0	0	0	0	0	0	0	0	0	0	7	0	13	0	0	0	0	0
Ec-00_003770	0	0	0	0	0	0	0	0	0	0	0	0	0	0	1	0	0	1	0	0	0	3	1	19	15	0	0	0	5	0	1	0	0	0	0	0	0	0	0	0	0
Ec-00_003780	0	1	7	4	7	4	5	3	0	0	0	0	0	0	0	3	5	0	0	0	0	1	2	0	0	0	0	0	0	0	0	0	0	0	0	0	0	0	0	0	0
Ec-00_003790	0	0	0	1	0	0	0	0	1	0	0	2	3	0	0	8	4	0	0	0	0	4	1	0	0	0	0	0	0	0	0	2	2	0	0	0	0	0	0	0	0
Ec-00_003800	0	0	0	0	0	1	0	0	0	0	0	0	2	0	0	0	0	0	0	0	0	0	0	0	0	0	0	0	0	0	0	0	1	1	0	0	0	0	0	0	0
Ec-00_003810	0	0	0	0	0	0	0	0	0	0	0	0	0	0	0	1	1	0	0	0	0	1	0	26	27	70	41	5	12	3	5	0	0	1	0	0	0	1	0	1	2
Ec-00_003820	1	3	5	7	0	0	1	1	0	1	0	2	0	1	1	2	2	0	0	1	0	2	0	3	1	5	6	3	3	2	4	1	0	3	1	0	0	1	0	0	1
Ec-00_003830	0	0	0	1	1	0	1	0	0	1	0	0	0	0	2	0	1	1	1	0	0	1	0	20	10	0	5	3	5	1	0	5	1	3	0	0	0	0	0	0	0
Ec-00_003840	0	0	1	1	0	0	6	2	0	0	0	0	1	0	2	0	1	1	0	0	0	0	0	1	0	0	0	0	1	0	0	0	0	0	0	0	0	0	0	0	0
Ec-00_003850	0	0	0	0	0	0	0	0	0	0	0	0	0	0	0	0	0	0	0	0	0	0	1	0	0	0	0	0	0	0	0	0	0	0	0	0	0	0	0	0	0
Ec-00_003860	0	0	0	0	0	0	0	0	0	0	1	17	7	1	8	0	0	0	0	1	2	20	12	313	215	11	23	28	43	17	16	13	13	3	4	1	0	4	2	3	6
Ec-00_003870	0	0	0	0	0	1	0	0	0	0	0	5	17	8	14	0	0	0	1	1	1	0	0	4	4	5	0	4	1	0	0	0	0	0	0	0	0	0	0	0	0
Ec-00_003880	0	0	0	0	0	2	2	0	0	1	0	1	0	0	1	0	0	0	0	1	1	0	0	0	0	0	0	0	1	1	0	1	4	0	0	1	0	0	0	0	0
Ec-00_003890	0	0	1	0	0	1	4	0	0	4	0	36	36	18	125	0	0	1	1	5	7	1	0	3	6	38	7	2	1	1	3	4	4	1	0	1	0	0	1	0	0
Ec-00_003900	0	0	12	12	8	21	17	16	0	0	0	13	10	6	29	6	0	5	9	5	5	0	0	1	3	19	9	3	1	4	3	6	3	3	0	14	3	4	7	4	4
Ec-00_003910	46	46	108	270	137	223	147	111	83	61	100	278	292	196	431	300	252	79	72	56	69	108	102	125	134	97	65	196	218	157	145	478	399	290	403	81	21	44	75	30	47
Ec-00_003920	0	0	66	147	53	192	98	54	1	0	2	0	0	0	1	15	16	3	1	25	22	0	0	1	0	2	0	2	0	0	0	0	0	0	0	35	10	32	56	28	52
Ec-00_003930	0	0	0	0	0	0	0	0	0	0	0	30	7	30	136	1	2	0	0	2	0	0	0	9	11	21	2	2	5	0	5	7	5	14	5	0	0	1	0	0	0
Ec-00_003940	0	0	0	0	0	0	0	0	0	0	0	45	25	69	363	0	0	0	0	1	2	0	0	38	59	52	20	1	9	0	8	23	7	26	3	0	0	0	1	0	0
Ec-00_003950	0	0	0	0	1	0	0	0	0	0	0	10	7	9	61	0	0	0	0	0	0	1	1	4	4	10	5	0	0	1	0	2	1	0	0	0	0	0	0	0	0
Ec-00_003960	0	0	2	0	1	2	44	1	3	5	0	2001	1390	1892	5248	29	5	8	12	186	789	27	33	616	1346	1369	521	104	87	0	134	24	13	3	4	0	0	1	0	0	4
Ec-00_003970	0	0	0	0	0	0	0	0	0	1	0	2	1	0	2	0	0	1	0	0	0	0	0	2	0	0	0	1	1	0	0	1	0	1	0	0	0	0	0	0	0
Ec-00_003980	0	0	0	4	0	0	0	1	0	1	0	0	0	0	0	0	0	0	0	0	0	0	0	2	4	0	5	0	1	0	0	0	0	0	0	0	0	1	3	0	0
Ec-00_003990	13	7	4	9	3	13	6	4	4	4	1	4	7	0	4	0	1	0	0	0	1	0	0	0	0	0	0	0	0	0	0	0	0	0	0	0	0	0	0	0	0
Ec-00_004000	0	0	0	0	0	0	6	0	3	3	0	131	336	4	6	15	5	2	2	24	85	14	15	0	0	0	0	0	0	0	0	11	8	22	2	1	0	0	0	0	0
Ec-00_004010	1	0	0	0	0	0	0	0	0	0	0	0	1	0	0	0	0	0	0	0	0	0	0	0	0	0	0	0	0	0	0	0	0	0	0	0	0	0	0	0	0
Ec-00_004015	120	107	450	384	201	537	632	306	530	524	766	3077	2874	3040	5133	490	387	412	391	276	470	740	645	3249	3452	537	413	2834	2501	1027	1020	2438	2139	2263	3218	595	566	171	137	86	8
Ec-00_004020	7	2	12	26	12	10	25	28	36	41	33	78	96	31	82	17	24	29	16	3	9	59	47	22	26	6	7	20	24	8	4	14	28	26	15	12	5	2	2	1	4
Ec-00_004030	0	0	0	0	0	0	0	0	1	0	0	2	2	0	1	2	3	0	0	0	0	13	8	147	158	283	186	31	32	13	10	1	0	134	0	0	0	6	4	4	17
Ec-00_004040	0	0	0	0	0	0	0	0	0	0	0	0	0	0	0	0	0	0	0	0	0	0	0	0	0	0	0	0	0	0	0	0	0	1	0	0	0	0	0	0	0
Ec-00_004050	0	0	0	3	0	0	4	0	0	0	0	2	0	0	0	0	0	0	0	0	0	1	1	1	3	0	3	3	5	0	0	0	0	0	0	0	0	0	0	2	0
Ec-00_004060	0	0	0	0	0	0	0	0	0	0	0	0	1	0	0	0	0	0	0	0	0	0	0	0	0	0	0	0	0	0	0	0	0	0	0	0	0	0	0	0	0
Ec-00_004070	1	0	3	6	5	27	17	12	49	42	28	20	17	7	26	8	9	9	7	8	5	8	6	101	53	10	12	49	47	16	15	34	39	10	24	9	4	10	18	7	7
Ec-00_004080	0	0	0	0	0	0	0	0	0	0	0	0	0	0	0	0	0	0	0	0	0	0	0	0	0	0	0	0	0	0	0	0	0	0	0	0	0	0	0	0	0
Ec-00_004090	0	0	0	0	0	0	0	0	0	0	0	5	0	3	8	0	0	0	0	0	0	0	0	0	0	0	0	0	2	0	0	7	0	2	0	0	0	0	0	0	0
Ec-00_004100	0	0	0	1	0	0	3	0	0	0	0	27	64	25	145	12	6	0	0	2	4	2	1	5	5	3	2	5	6	1	1	23	24	44	5	0	0	0	0	0	0
Ec-00_004105	2	2	3	7	1	34	49	5	11	7	17	132	89	110	410	15	9	1	2	3	7	11	6	227	530	80	22	109	64	12	12	104	94	163	25	0	0	11	0	0	0
Ec-00_004110	0	0	1	1	0	1	3	1	0	0	2	2	0	0	0	0	0	0	0	0	0	0	0	1	0	0	0	0	1	0	0	0	3	1	0	0	0	1	0	1	0
Ec-00_004120	0	1	0	0	0	0	0	0	0	0	0	0	0	0	2	0	0	0	0	0	0	0	1	0	0	1	0	0	0	0	0	2	4	1	1	0	0	0	0	0	0
Ec-00_004125	0	0	0	1	0	2	23	0	0	0	0	1	0	2	0	3	0	4	1	3	9	26	8	15	19	17	15	31	15	0	0	0	1	0	0	0	0	0	1	0	0
Ec-00_004130	1	0	2	6	2	5	18	2	20	21	29	348	227	123	381	12	18	65	67	5	12	144	120	85	171	47	21	168	116	23	21	81	75	212	11	0	1	9	6	4	4
Ec-00_004140	0	0	0	1	0	2	22	0	1	0	1	143	199	179	313	6	1	5	4	6	17	1	0	18	49	102	36	13	7	0	6	2	2	0	0	0	0	0	2	0	0
Ec-00_004150	0	0	0	0	1	1	12	1	0	0	0	1	1	0	4	0	0	0	0	5	16	0	0	0	0	0	0	1	0	0	0	0	0	0	0	0	0	0	0	0	0
Ec-00_004160	0	0	5	0	0	21	224	2	26	32	6	4804	3996	2351	6547	21	15	63	50	228	1125	31	33	876	2187	1038	459	468	413	1	114	79	59	14	6	0	2	9	5	2	0
Ec-00_004170	0	0	0	0	0	0	0	0	0	0	0	0	0	0	0	0	0	0	0	3	11	0	0	0	0	0	0	0	0	0	0	0	0	0	0	0	0	0	0	0	0
Ec-00_004180	0	0	0	0	0	0	0	2	0	0	0	1	2	3	0	0	0	0	0	0	0	2	0	0	1	0	0	0	0	0	1	1	0	0	0	0	0	0	0	0	0
Ec-00_004190	0	0	0	0	1	0	0	0	0	0	0	24	10	9	33	0	1	0	0	0	0	0	0	0	2	0	2	5	0	1	0	2	0	0	2	0	1	0	2	0	1
Ec-00_004200	0	0	0	0	2	2	1	0	0	0	0	0	0	0	0	0	0	0	0	5	10	0	0	2	0	0	0	1	1	0	0	0	0	0	0	0	0	0	0	0	0
Ec-00_004210	0	0	2	0	0	10	110	1	3	5	2	1644	1302	1544	4027	17	14	25	9	149	507	13	15	236	456	1234	530	57	44	2	125	22	3	4	2	0	1	0	0	1	3
Ec-00_004220	0	0	4	7	1	3	7	2	2	12	37	44	36	66	254	70	17	8	8	7	3	11	16	141	145	25	31	28	59	11	28	24	80	32	67	0	1	12	24	1	8
Ec-00_004225	0	0	5	0	0	5	7	0	0	0	0	10	13	5	82	1	0	0	0	1	1	0	0	7	16	1	4	2	3	2	0	0	14	7	9	0	0	0	2	0	0
Ec-00_004230	4	5	0	0	0	12	1	2	0	4	1	10	17	7	23	1	2	1	0	4	6	0	0	5	10	13	9	4	5	18	17	20	27	19	44	2	0	3	9	5	3
Ec-00_004235	23	17	13	21	17	35	20	14	49	62	18	296	310	50	92	31	4	11	18	42	39	9	9	489	490	35	42	227	253	46	70	139	204	191	316	79	27	73	100	33	55
Ec-00_004240	0	0	0	0	0	0	0	0	0	0	0	0	0	0	0	0	0	0	0	0	0	0	0	0	0	0	0	0	0	0	0	0	1	0	1	0	0	0	0	0	0
Ec-00_004250	11	8	2	10	10	11	25	8	23	36	40	465	498	583	1044	204	173	202	267	192	284	166	165	1023	1314	441	466	1087	1021	460	417	684	683	684	765	354	336	132	153	151	169
Ec-00_004260	0	0	0	0	0	0	0	0	0	0	0	1	4	16	12	0	0	0	0	1	4	0	0	2	1	0	0	0	1	1	2	0	2	1	1	0	0	0	0	0	0
Ec-00_004270	2	1	664	648	306	296	452	354	3	3	2	1	1	3	0	8	5	3	3	30	31	0	0	3	5	0	0	0	0	0	0	3	3	3	8	35	16	21	30	16	14
Ec-00_004280	42	42	1982	2505	1627	1702	4066	3343	805	816	1158	4375	4460	1672	4831	1843	1566	1422	1208	1477	1431	1361	964	3161	3136	3353	5567	1987	2518	3420	4020	3742	3119	2663	2530	633	1579	630	866	915	1181
Ec-00_004290	71	65	643	814	652	1458	1364	873	953	1220	1070	2289	2453	1441	2871	1400	628	1155	1103	952	976	980	756	2836	3322	1462	1842	2191	2508	1496	1465	2345	2459	1414	2378	567	587	476	812	622	795
Ec-00_004300	91	86	118	169	109	147	144	105	93	121	144	1098	1097	590	979	149	150	178	205	378	378	209	179	484	588	259	375	499	568	983	871	1263	1672	970	1951	153	54	339	723	423	480
Ec-00_004310	123	98	749	725	577	532	916	707	314	460	328	1093	1514	890	2266	727	300	854	767	1072	956	430	324	918	945	1147	1536	819	798	1304	1483	2409	2694	791	2091	385	173	253	522	413	663
Ec-00_004320	2	1	122	108	52	142	240	133	386	413	321	476	331	160	531	388	286	246	278	361	340	126	67	390	316	701	805	349	465	902	954	473	536	366	639	275	437	231	344	274	655
Ec-00_004330	70	72	3	9	26	5	1	8	1	1	0	1003	1047	162	312	4	2	1	1	52	58	0	3	635	401	9	5	177	292	122	123	579	946	684	524	28	18	101	67	150	114
Ec-00_004350	22	13	389	650	396	286	459	563	193	222	238	784	503	231	892	180	367	160	153	194	244	324	220	413	348	703	1011	437	313	821	932	485	331	507	468	188	383	116	223	229	253
Ec-00_004360	0	0	0	1	0	0	0	0	0	0	0	0	0	0	0	0	0	0	0	0	0	0	0	0	0	0	0	0	0	0	0	0	0	0	0	0	0	0	0	0	0
Ec-00_004370	0	0	1	4	1	5	17	6	1	1	4	0	1	1	2	0	0	2	1	0	1	0	0	11	18	0	0	7	2	0	0	0	1	2	0	0	0	0	0	0	0
Ec-00_004375	0	0	0	0	0	0	0	0	0	0	0	3	2	4	8	0	0	0	0	0	0	1	0	11	5	0	0	13	25	0	1	68	38	41	22	0	0	1	0	0	0
Ec-00_004380	2	2	8	9	3	10	5	6	9	8	8	17	15	15	17	11	6	11	14	35	21	3	4	75	119	29	28	112	127	18	30	79	57	32	75	41	15	7	21	19	20
Ec-00_004390	0	0	0	0	0	0	0	0	0	0	0	0	0	0	0	0	0	0	0	0	0	0	0	0	0	0	0	0	0	0	0	0	0	0	0	0	0	0	0	0	0
Ec-00_004400	0	0	0	0	0	0	0	0	0	0	0	0	0	0	0	0	0	0	0	0	0	0	0	0	0	0	0	0	0	0	0	0	0	0	0	0	0	0	0	0	0
Ec-00_004420	0	0	0	1	0	0	0	0	0	0	0	0	1	0	0	0	0	0	0	0	0	0	0	0	0	0	0	0	0	0	0	0	0	0	0	0	0	0	0	0	0
Ec-00_004430	1	0	0	0	0	0	0	0	0	0	0	2	0	0	2	0	0	0	0	0	0	0	0	0	0	0	0	0	0	0	0	0	2	1	1	0	0	0	0	0	0
Ec-00_004440	0	0	0	0	0	0	0	0	0	3	0	14	13	1	0	0	0	0	0	0	1	2	1	0	0	0	0	0	0	0	0	0	0	0	0	0	0	0	0	0	0
Ec-00_004450	0	0	5	6	0	4	1	1	0	0	0	2	0	0	7	1	1	0	0	8	5	0	0	51	31	1	6	29	36	25	27	102	65	69	75	10	4	4	20	4	5
Ec-00_004460	9	3	7	2	0	1	2	0	0	0	1	3	5	0	34	2	5	0	3	44	23	0	0	206	231	20	45	272	246	259	200	293	235	249	368	91	17	46	69	40	59
Ec-00_004470	4	4	0	4	1	0	2	0	0	0	0	3	0	0	18	0	0	1	0	43	26	0	1	365	438	29	42	620	536	188	197	313	334	180	223	50	12	36	66	38	47
Ec-00_004480	0	0	0	0	0	0	0	0	1	2	0	0	0	0	1	0	0	0	0	1	2	0	0	3	2	8	5	2	4	4	3	3	9	1	0	0	4	1	1	0	0
Ec-00_004490	3	4	0	1	0	0	2	0	1	0	0	2	2	0	72	3	0	3	3	200	119	0	1	390	465	69	230	480	487	997	1110	932	689	952	563	75	52	120	133	94	72
Ec-00_004495	0	0	0	0	0	1	0	0	0	0	0	0	0	0	5	0	0	1	0	31	20	1	0	3	2	2	12	9	4	13	14	90	53	49	19	5	1	3	7	4	3
Ec-00_004500	8	4	5	4	3	4	11	4	0	1	0	20	12	4	26	0	0	1	1	92	78	19	21	612	524	70	110	496	1239	285	278	1205	1040	206	698	170	32	49	113	43	102
Ec-00_004505	4	4	0	3	6	3	2	2	2	0	0	0	0	0	17	0	0	0	0	23	11	0	0	70	103	15	40	121	100	55	57	151	98	63	124	52	15	9	12	7	6
Ec-00_004507	1	0	0	2	3	0	1	4	0	0	0	3	2	0	19	3	0	0	1	39	35	1	0	340	608	49	105	784	803	331	386	657	388	127	233	166	18	48	66	41	35
Ec-00_004510	0	0	6	0	0	13	111	3	8	12	4	1956	1467	1093	3410	15	16	26	15	116	401	11	12	89	130	607	323	52	24	1	76	23	11	5	0	0	0	2	0	0	2
Ec-00_004520	111	92	733	745	615	704	832	769	1405	2307	2202	3719	4518	2477	3931	1693	1452	1931	1592	645	787	932	751	2219	2470	1455	1052	2065	2194	5657	4946	1716	2532	1481	8180	593	196	1431	3528	1157	2238
Ec-00_004530	0	0	0	0	0	0	0	0	0	0	0	0	1	0	0	3	0	0	0	0	0	0	0	0	0	0	0	0	0	0	0	1	0	3	2	0	0	0	0	1	3
Ec-00_004540	23	16	4	5	12	3	3	5	4	3	5	598	522	45	125	0	1	3	1	60	61	5	0	171	189	13	18	85	145	107	145	260	571	354	303	14	5	88	57	122	91
Ec-00_004550	23	14	230	333	185	343	394	259	104	150	90	292	247	93	241	134	81	63	67	78	86	85	71	291	305	229	257	229	256	217	265	231	285	196	193	78	119	45	69	54	68
Ec-00_004560	36	17	854	975	600	798	1382	915	723	854	1158	3076	2246	1381	3798	1400	1236	1179	1032	1207	1189	934	622	1722	1391	2388	3580	1319	2149	2634	3158	2571	2393	1887	2110	555	822	592	955	884	1247
Ec-00_004590	3	1	196	224	163	130	136	189	63	109	116	53	31	28	77	80	57	52	50	100	78	13	6	66	36	145	178	41	93	207	236	91	102	95	42	58	156	94	111	110	157
Ec-00_004570	56	41	390	569	371	465	767	624	247	408	276	1633	1870	719	2155	458	461	405	484	555	527	592	418	832	877	1897	2707	770	740	1971	2236	1366	1462	1568	1616	208	523	281	377	328	369
Ec-00_004580	0	1	0	2	5	6	4	1	0	0	0	0	0	0	0	0	0	0	0	0	0	0	0	0	0	0	0	0	0	0	0	1	0	0	0	0	0	0	1	0	0
Ec-00_004600	4	12	96	186	143	82	97	119	27	31	49	67	66	47	80	37	37	25	14	60	38	9	7	93	60	41	82	67	82	62	80	119	97	111	97	60	78	34	43	42	107
Ec-00_004610	5	0	3	5	3	18	80	17	9	12	18	191	228	80	231	82	25	55	43	118	106	53	32	125	145	219	313	144	172	260	350	281	295	256	266	27	22	39	77	96	192
Ec-00_004620	7	4	92	146	104	116	195	179	106	142	101	438	366	144	337	208	108	104	137	160	161	126	90	288	278	301	428	251	272	429	569	314	348	256	486	85	138	91	143	112	148
Ec-00_004630	54	47	1655	2513	1445	1944	4286	3263	675	1070	1682	7285	8003	2823	8205	3225	2212	4709	3649	2706	3023	2216	1657	2005	2668	4273	6980	2108	1887	4442	5462	5767	4834	4121	3019	493	1846	1314	1785	1523	1325
Ec-00_004640	106	109	870	1210	795	583	950	865	361	627	311	1744	1619	673	1873	480	578	344	446	782	702	371	274	672	711	1392	1991	665	721	2211	2631	1631	1687	1399	2113	280	411	477	736	689	838
Ec-00_004650	730	580	142	200	182	143	265	147	57	136	97	1110	1364	381	1266	375	357	342	297	545	459	251	184	226	268	1006	1648	240	255	1251	1583	1071	1165	736	802	102	113	167	345	288	290
Ec-00_004670	40	31	445	490	447	450	583	499	674	904	658	2337	2317	1152	3139	1001	760	789	811	1134	941	450	311	1727	1832	1811	1720	1749	2026	2461	2632	2281	2399	2334	2995	953	419	660	1198	1209	1743
Ec-00_004680	0	0	17	25	31	168	372	117	267	374	434	142	127	271	380	109	82	120	86	12	16	47	43	53	72	4	4	9	23	2	0	0	0	6	3	3	0	0	0	1	1
Ec-00_004690	2	2	21	29	27	172	286	141	97	172	197	202	251	57	189	54	25	30	19	14	19	11	11	288	253	47	55	250	354	118	97	254	231	73	88	44	8	16	38	17	42
Ec-00_004700	1	1	5	14	6	90	8	7	59	92	170	174	104	49	208	0	0	2	1	2	0	0	1	214	165	2	2	118	150	12	7	182	119	118	97	4	4	4	0	1	0
Ec-00_004720	0	0	1	2	4	1	4	1	0	0	0	0	0	0	0	0	0	0	0	0	1	0	0	0	0	0	0	0	0	0	0	0	0	0	0	0	0	0	3	0	0
Ec-00_004740	5	3	2	4	4	17	38	27	5	6	0	2	9	12	14	2	2	0	0	26	22	0	0	47	14	249	1472	42	33	190	442	281	74	17	26	35	17	8	30	40	26
Ec-00_004745	1	0	2	2	2	0	0	3	0	1	0	19	19	4	8	2	0	0	0	5	10	0	0	69	80	19	25	46	41	61	45	67	71	59	39	17	1	11	17	4	1
Ec-00_004750	26	19	44	46	21	35	77	35	42	46	28	181	169	48	177	65	102	41	46	84	71	45	48	82	109	195	211	111	122	300	312	150	107	212	68	46	123	47	68	54	86
Ec-00_004760	9	11	37	22	12	74	89	35	147	117	134	1248	1032	1157	1570	204	189	151	289	165	242	292	225	1684	2044	276	346	2242	2424	3068	2698	1911	1832	1981	3761	284	76	735	1290	581	526
Ec-00_004770	0	0	0	1	0	4	1	0	1	7	10	35	16	6	34	9	4	7	5	5	4	8	4	29	12	20	11	35	47	119	98	38	31	24	68	16	2	7	43	9	19
Ec-00_004780	0	0	3	1	0	5	2	0	0	0	0	0	0	0	0	4	10	1	7	9	1	0	0	0	0	0	0	0	0	0	0	0	0	0	0	22	3	10	54	15	23
Ec-00_004790	0	0	4	1	2	7	3	0	0	0	0	0	0	0	0	3	13	1	7	6	3	0	0	0	0	1	3	0	0	0	1	0	0	0	0	11	1	11	48	14	41
Ec-00_004800	0	0	3	6	0	8	12	2	0	0	0	0	0	1	0	6	3	11	12	10	9	0	0	0	2	0	0	3	0	0	0	0	0	0	0	22	10	23	78	21	22
Ec-00_004810	109	104	115	107	69	64	59	68	12	15	6	7	20	8	22	18	16	12	14	90	53	0	0	110	54	302	977	131	71	208	325	326	344	60	137	88	31	17	75	81	58
Ec-00_004820	2	1	2	5	3	15	16	4	33	41	15	98	130	154	138	32	12	24	34	13	19	47	39	142	219	19	10	223	219	180	198	129	145	144	402	12	4	27	45	13	12
Ec-00_004830	0	0	2	1	0	0	0	0	1	1	0	1	1	0	2	2	0	0	0	0	0	1	0	11	6	0	0	8	6	0	0	2	0	1	0	0	0	0	2	0	0
Ec-00_004840	0	0	0	1	0	0	0	0	0	0	0	0	0	0	0	0	0	0	0	0	0	0	0	0	0	0	0	0	0	0	0	0	0	0	0	0	0	0	0	0	0
Ec-00_004850	0	0	0	0	0	0	0	0	0	0	0	0	0	0	0	0	0	0	0	0	0	0	0	0	0	0	0	0	0	0	0	0	0	0	0	0	0	0	0	0	0
Ec-00_004860	0	0	3	0	0	1	129	0	3	6	0	3955	3398	1744	5672	21	5	21	20	204	1021	13	18	173	354	1162	615	85	47	4	177	41	15	2	5	0	1	1	2	2	4
Ec-00_004870	0	0	0	0	0	1	0	0	0	0	0	0	0	0	2	0	0	0	0	0	0	0	0	1	0	2	0	0	0	0	0	0	0	0	0	0	0	0	0	0	0
Ec-00_004885	0	0	0	0	0	0	0	0	0	0	0	0	0	0	0	0	0	0	0	0	0	0	0	0	0	0	0	0	0	0	0	0	0	0	0	0	0	0	0	0	0
Ec-00_004887	0	0	2	0	0	5	40	1	0	1	0	555	504	339	761	5	1	1	3	18	88	0	1	20	26	146	118	5	4	2	33	9	2	1	0	0	1	0	0	5	5
Ec-00_004890	0	0	1	0	0	0	3	0	0	0	0	13	14	5	41	0	0	0	0	0	3	0	0	3	9	5	2	1	4	0	0	0	0	0	1	0	0	0	0	0	0
Ec-00_004900	0	0	0	0	1	1	2	0	0	0	0	17	15	4	30	0	0	0	0	2	6	0	1	1	6	19	2	2	0	0	3	0	3	2	0	0	0	1	0	0	0
Ec-00_004910	9	4	5	14	6	13	15	11	24	31	28	68	74	32	183	64	49	50	45	303	219	8	15	525	482	472	725	325	537	887	845	1797	1259	631	818	488	301	125	328	147	209
Ec-00_004920	2	5	0	1	2	5	5	1	1	1	1	0	0	0	10	0	1	0	1	53	31	0	0	43	56	24	82	25	48	71	48	258	191	86	109	36	28	18	29	16	24
Ec-00_004940	4	5	2	3	4	13	26	5	4	10	4	2	3	0	55	1	0	2	2	112	78	1	1	293	186	58	173	207	284	187	152	664	470	194	369	194	61	65	139	44	75
Ec-00_004950	0	0	1	6	2	24	19	13	0	0	0	0	0	0	0	0	0	0	1	36	19	0	0	0	0	0	0	0	2	0	0	0	0	0	1	40	19	18	54	21	36
Ec-00_004960	0	1	3	6	3	35	19	14	0	3	2	1	4	0	14	1	0	2	2	39	31	0	0	93	55	33	83	86	91	60	62	227	140	90	133	52	37	21	45	20	34
Ec-00_004970	0	0	0	0	1	5	2	0	0	0	0	0	0	0	0	0	0	0	0	3	5	0	0	0	0	0	0	0	0	0	0	0	0	0	0	4	0	1	0	2	0
Ec-00_004980	0	0	0	0	0	2	4	0	2	3	1	3	2	2	12	1	0	2	1	0	1	1	0	51	75	6	0	4	2	2	0	0	0	1	0	0	0	0	1	0	0
Ec-00_004985	0	0	0	0	0	0	0	0	0	0	0	2	3	3	7	0	0	0	0	1	3	0	0	4	0	10	0	0	0	0	0	0	0	0	0	0	0	0	0	0	0
Ec-00_004990	0	1	0	0	1	0	0	0	0	0	0	0	0	0	0	0	0	0	0	0	1	0	0	0	0	0	0	0	0	0	0	0	0	0	0	0	0	0	0	0	0
Ec-00_004995	2	0	0	0	1	0	0	0	0	0	0	3	1	4	12	0	0	1	0	0	1	0	0	1	0	20	1	1	0	0	1	0	0	0	0	0	0	0	0	0	0
Ec-00_005000	2	1	7	11	6	22	5	5	5	21	22	39	40	29	20	1	0	2	4	1	2	0	4	40	28	10	8	17	22	7	4	33	30	16	35	3	0	1	0	0	0
Ec-00_005010	0	0	0	0	0	0	1	0	0	0	0	0	0	0	2	1	0	1	1	6	41	0	0	0	0	0	0	1	0	0	0	0	0	2	0	0	2	0	0	0	1
Ec-00_005020	0	0	2	0	0	7	64	2	2	1	1	939	744	880	2682	27	6	9	11	126	496	16	11	162	272	1245	593	59	75	18	155	175	107	105	50	0	1	5	3	3	0
Ec-00_005025	0	0	2	0	0	11	19	1	3	0	0	527	377	477	1886	20	5	19	22	100	371	20	13	228	470	1102	366	73	63	4	72	93	57	80	28	3	2	7	3	5	4
Ec-00_005030	538	357	395	649	211	328	211	135	764	1072	1078	809	634	454	897	309	110	262	232	80	175	309	249	378	416	259	128	202	226	79	90	407	418	462	309	48	104	5	4	8	7
Ec-00_005040	112	109	187	239	126	96	132	118	109	159	112	435	335	285	1033	322	194	77	83	284	252	232	191	136	143	492	326	124	93	176	261	603	474	242	316	177	86	0	0	10	6
Ec-00_005050	0	0	0	0	0	0	0	0	0	0	0	0	0	0	0	0	0	0	0	0	0	0	0	0	0	0	0	0	0	0	0	0	0	0	0	0	0	0	0	0	0
Ec-00_005060	0	0	0	0	0	0	0	0	0	0	0	0	0	0	0	0	0	0	0	0	0	0	0	0	0	0	0	0	0	0	0	0	0	3	0	0	0	0	0	0	1
Ec-00_005070	0	0	0	0	0	0	0	0	0	0	0	0	0	0	0	0	0	0	0	0	0	0	0	0	0	0	0	0	3	0	0	0	0	0	0	0	0	0	0	0	0
Ec-00_005080	0	0	0	0	0	0	0	0	0	0	0	0	0	0	0	0	0	0	0	0	0	0	0	0	0	0	0	0	0	0	0	0	0	0	0	0	0	0	0	0	0
Ec-00_005090	0	0	0	0	0	0	0	0	0	0	0	0	9	0	2	1	0	0	0	3	1	2	1	0	0	0	0	0	0	0	0	0	0	0	0	0	0	0	0	0	0
Ec-00_005100	0	0	0	0	0	0	0	0	0	0	0	0	0	0	0	0	0	0	0	0	0	0	0	0	0	0	0	0	0	0	0	0	0	0	0	0	0	0	0	0	0
Ec-00_005115	16	12	8	22	10	148	83	3	8	9	23	95	51	41	98	5	4	40	36	109	94	10	5	428	498	123	175	471	416	210	236	360	267	203	193	126	72	43	55	40	70
Ec-00_005120	0	0	0	0	0	0	1	0	0	0	0	0	0	0	2	0	0	0	0	2	0	1	0	3	3	1	3	5	0	0	0	1	0	1	1	1	0	1	0	1	2
Ec-00_005130	0	0	0	0	0	0	0	0	0	0	0	0	0	0	0	0	0	0	0	1	0	0	0	1	0	0	0	0	2	0	0	0	0	0	0	4	3	0	0	0	0
Ec-00_005140	250	217	371	422	285	308	291	248	174	183	100	605	647	345	668	231	139	189	176	173	194	183	183	650	877	269	232	800	843	196	276	665	620	572	668	271	270	102	107	167	258
Ec-00_005150	246	181	473	551	439	436	458	435	181	297	174	799	927	409	955	349	310	283	263	452	384	158	143	410	344	804	849	401	442	925	982	1180	1155	1020	1098	224	484	192	266	300	373
Ec-00_005160	1	0	7	3	1	21	8	3	7	2	11	41	37	27	65	22	5	14	12	14	14	9	8	40	51	17	5	28	23	5	11	24	14	41	45	14	1	1	13	4	5
Ec-00_005170	1	1	38	12	12	45	45	14	32	36	42	174	144	68	195	103	30	76	87	53	64	25	17	91	80	140	92	57	92	85	97	122	96	138	157	54	15	20	47	36	63
Ec-00_005180	8	7	2	3	4	0	1	3	0	0	0	564	691	234	862	7	6	3	16	379	311	9	8	596	322	354	253	175	398	415	475	511	825	459	914	123	29	91	250	367	455
Ec-00_005190	19	15	138	209	98	321	417	218	445	282	189	1994	2213	1599	2478	362	249	376	700	979	1068	498	401	1829	2567	1370	1366	2876	2342	3272	3123	4424	3188	2768	3130	1075	709	752	1205	823	672
Ec-00_005200	58	50	294	348	258	351	613	471	596	814	641	1938	2148	1154	2579	844	664	950	977	980	996	494	402	883	785	834	1287	793	824	1485	1646	2098	2261	1419	2405	441	441	570	1202	885	1328
Ec-00_005210	326	234	773	1155	684	796	969	867	614	837	419	1122	849	450	1175	742	614	442	465	508	537	328	217	956	774	1106	1537	625	935	1290	1301	818	874	706	692	294	690	325	453	460	724
Ec-00_005220	84	62	577	704	484	392	559	525	465	728	719	1152	1299	570	1302	357	451	231	328	847	757	127	77	1123	884	638	846	805	1497	1070	1119	2405	2693	1095	1527	302	641	474	850	701	1344
Ec-00_005230	39	23	101	149	113	108	178	131	77	96	94	595	585	289	761	166	155	181	160	221	204	156	126	206	270	404	700	241	235	660	727	475	548	461	575	62	110	132	222	147	153
Ec-00_005240	2	3	258	282	208	261	358	398	114	267	203	311	304	105	366	329	250	276	209	240	248	80	41	159	132	725	990	104	135	556	673	340	256	206	211	120	236	74	142	142	186
Ec-00_005250	0	0	10	0	1	47	571	4	17	21	7	11028	10110	6674	17746	76	38	99	90	932	3147	83	75	743	1763	5282	2249	394	236	3	616	70	18	6	2	0	0	0	2	8	5
Ec-00_005260	0	0	0	0	0	0	0	0	0	0	0	0	0	0	0	0	0	0	0	0	0	0	0	0	0	0	0	0	0	0	0	0	0	0	0	0	0	0	0	0	0
Ec-00_005270	0	0	0	0	0	0	0	0	0	0	0	0	0	0	0	0	0	0	0	0	1	0	0	0	0	0	0	0	0	0	0	0	0	0	0	0	0	0	0	1	0
Ec-00_005275	0	0	0	0	0	0	0	0	0	0	0	3	1	1	3	0	0	0	0	0	0	0	0	0	1	4	0	0	0	0	0	0	0	2	0	0	0	0	0	0	0
Ec-00_005280	0	0	0	0	0	1	0	0	1	0	1	0	0	0	1	0	1	0	0	1	1	0	0	19	31	0	1	12	19	1	0	3	3	6	3	2	3	3	3	1	0
Ec-00_005285	132	97	83	123	80	178	241	87	100	102	984	26	15	1	900	37	30	112	146	3924	2947	17	23	8786	9182	9727	12513	7302	9772	9828	10084	12673	8776	7268	6995	4759	4269	1274	1383	1424	569
Ec-00_005290	0	0	0	0	0	0	1	0	0	0	0	0	0	0	0	0	0	0	0	20	5	0	0	0	0	0	0	0	0	0	0	0	0	0	0	29	8	5	19	4	4
Ec-00_005300	0	0	1	0	0	0	0	0	0	1	1	0	0	0	4	0	0	0	0	3	3	0	0	13	21	7	6	5	17	5	8	43	24	14	40	27	4	6	8	7	5
Ec-00_005310	175	145	0	36	26	19	8	15	49	58	22	44	24	1	620	11	4	35	53	2560	1889	0	0	5935	6309	3412	6395	5543	6623	7181	6685	12516	11198	6605	11838	2247	2553	2033	3707	2179	1892
Ec-00_005320	0	1	0	0	0	1	0	0	5	10	3	9	11	6	28	1	6	0	0	5	0	2	2	61	43	9	15	189	112	39	32	92	64	129	40	1	0	37	28	9	7
Ec-00_005325	27	19	949	1495	1061	877	737	687	341	767	280	439	172	136	449	607	415	476	412	296	270	177	160	266	242	507	325	221	291	310	240	218	139	653	621	548	516	193	217	161	165
Ec-00_005327	31	39	367	451	190	238	253	206	239	508	457	2558	901	943	2695	1299	919	1783	1330	799	675	661	563	685	707	2179	1596	498	538	1050	1093	827	521	3190	3366	1159	810	360	405	353	217
Ec-00_005330	0	0	0	0	0	0	0	0	0	0	0	276	194	240	1166	4	0	1	2	14	95	3	2	10	31	79	34	3	3	0	6	13	7	2	0	0	0	0	0	0	0
Ec-00_005340	0	0	0	0	0	0	0	0	0	0	0	0	0	0	0	0	0	0	0	0	0	0	0	1	0	0	0	0	1	0	0	0	0	0	0	0	0	0	0	0	0
Ec-00_005350	0	0	1	1	2	1	0	0	0	0	0	0	0	0	0	0	1	0	0	0	0	0	0	0	1	0	0	0	0	0	0	0	0	0	0	0	0	0	0	0	0
Ec-00_005360	0	0	0	0	0	0	0	0	0	0	0	0	0	0	0	0	0	0	0	0	0	0	0	0	0	0	0	0	0	0	0	0	0	0	0	0	0	0	0	0	0
Ec-00_005370	1	0	0	0	0	0	0	0	1	0	0	0	1	0	1	0	0	0	1	9	6	0	0	2	22	11	12	6	1	0	1	3	1	18	6	6	0	0	1	0	1
Ec-00_005380	0	0	26	24	10	2	17	6	14	40	22	4	2	9	16	2	1	7	4	6	6	1	0	4	2	0	4	0	4	0	0	12	14	23	16	10	9	1	1	0	0
Ec-00_005390	92	91	700	819	317	605	1030	594	709	930	1413	1037	1325	943	1939	401	273	1769	1692	1859	1437	185	163	302	289	35	32	224	219	242	238	2520	2913	3101	2941	799	779	368	391	39	32
Ec-00_005400	0	0	18	15	16	12	5	13	7	5	1	11	11	4	9	0	0	0	1	0	0	1	2	21	21	0	0	10	19	0	0	7	3	4	14	1	0	0	0	0	2
Ec-00_005410	43	27	391	367	245	397	786	592	283	369	232	4344	5111	3257	4794	496	574	404	685	920	1046	466	441	1093	1479	1251	1340	1158	1102	2657	2884	4295	4830	3559	4876	390	559	1147	1494	755	951
Ec-00_005420	5	6	26	28	21	27	56	9	1	2	3	6	3	0	3	4	1	1	1	6	2	1	0	3	0	3	3	4	4	3	9	3	2	3	2	0	0	4	2	6	4
Ec-00_005430	168	158	218	348	156	129	206	82	17	29	7	58	65	25	56	9	2	4	4	18	12	14	2	24	29	33	36	24	36	74	73	58	81	80	58	1	2	26	24	48	103
Ec-00_005440	115	79	116	152	91	93	128	42	10	22	12	32	47	19	32	13	8	9	5	9	12	6	8	18	17	16	28	14	22	18	23	26	26	30	23	4	7	4	10	17	8
Ec-00_005450	24	17	432	927	554	519	352	283	133	179	174	464	461	216	475	314	230	319	293	356	372	104	99	259	261	217	286	247	251	341	371	539	509	424	685	220	233	206	291	245	258
Ec-00_005460	1952	1578	628	1105	654	401	425	250	113	159	184	1273	1371	594	1076	334	126	329	302	271	357	172	115	1007	793	684	710	785	1458	1072	1227	1304	1252	802	729	83	82	157	194	185	91
Ec-00_005470	9	11	94	172	105	68	131	55	7	5	3	3	6	0	2	1	3	2	2	6	3	0	0	5	4	1	0	10	13	1	3	6	3	5	5	0	0	4	3	14	11
Ec-00_005475	1139	952	581	619	473	197	475	452	40	125	181	673	992	639	867	159	186	360	375	629	641	145	103	189	164	784	2198	163	175	2830	3271	1557	1348	767	2157	48	63	296	782	530	186
Ec-00_005480	0	0	0	0	0	0	0	0	0	0	0	2	0	0	3	2	0	0	0	1	0	0	0	0	4	3	2	1	0	0	1	0	1	0	0	0	0	0	0	1	0
Ec-00_005490	1	0	0	0	0	0	0	0	0	0	0	0	0	0	0	0	0	0	0	0	0	0	0	0	0	0	0	0	0	1	0	0	0	0	0	0	0	0	0	0	0
Ec-00_005500	0	0	0	0	0	0	0	0	0	0	0	0	1	1	2	0	0	0	0	0	0	0	0	0	0	0	0	0	0	0	0	0	0	0	0	0	0	0	0	0	0
Ec-00_005510	0	0	7	0	0	28	137	1	1	2	0	1040	860	571	1682	16	4	12	2	55	286	7	7	79	161	385	155	45	25	0	58	8	2	4	0	1	0	0	0	0	0
Ec-00_005520	6	11	7	3	1	13	25	8	13	25	13	12	23	12	33	13	5	19	14	11	18	7	8	10	25	11	15	13	10	14	15	10	19	20	27	1	4	9	13	8	3
Ec-00_005530	72	52	494	603	376	314	486	445	766	905	777	1132	1177	484	850	862	803	607	589	225	290	694	501	402	391	586	370	451	471	330	393	243	364	415	187	213	451	150	119	92	148
Ec-00_005540	28	22	245	275	143	252	401	272	184	262	329	459	555	242	622	186	186	213	216	286	296	176	163	430	437	625	817	351	381	612	679	704	678	517	823	136	295	168	219	205	306
Ec-00_005550	234	197	258	221	187	143	265	209	107	125	245	483	539	217	547	168	131	183	193	272	244	98	90	219	228	548	658	159	187	677	794	542	587	436	607	60	156	97	170	208	137
Ec-00_005560	810	606	1561	1568	1124	627	1238	1167	1377	2131	2068	6258	5183	2823	7108	3675	3261	3007	2658	2136	2441	3482	2527	1687	2016	3470	4124	2003	2142	4995	5185	3388	3386	4965	7810	625	1213	1479	1873	1344	1925
Ec-00_005570	10	11	115	195	102	115	248	185	70	95	78	482	644	328	567	127	91	146	153	182	213	162	124	200	277	255	312	263	257	238	227	462	556	344	712	92	42	92	177	118	115
Ec-00_005580	15	18	1227	1924	918	618	1000	1507	294	425	359	2973	2072	995	3846	457	1337	368	435	775	836	864	688	598	746	3561	5748	1034	689	6410	7116	1594	1162	2664	2130	231	1244	661	919	1042	1381
Ec-00_005590	81	51	39	54	88	68	63	59	36	67	31	732	743	173	308	40	24	21	28	97	90	36	33	251	353	95	67	290	332	321	238	412	800	776	566	39	23	94	76	144	56
Ec-00_005595	16	14	46	59	56	96	84	54	1	2	2	18	23	15	37	1	1	2	4	29	29	2	2	83	73	40	44	84	46	42	32	99	56	55	62	18	16	2	10	5	3
Ec-00_005605	18	18	8	28	19	8	10	6	1	18	1	27	22	5	30	1	0	1	0	7	4	0	0	15	14	16	10	9	20	31	18	27	29	38	42	11	0	11	10	18	9
Ec-00_005610	31	24	92	87	96	131	254	97	97	118	133	412	671	368	772	97	54	167	170	229	220	138	106	810	957	492	617	796	1085	645	630	1230	1441	333	625	121	149	227	382	248	315
Ec-00_005620	5	3	8	3	5	96	77	33	32	24	30	337	407	170	362	111	22	63	67	194	152	12	12	333	287	214	243	241	287	219	233	377	401	152	239	123	30	64	116	108	197
Ec-00_005630	13	14	1	9	8	2	3	2	6	6	6	912	532	566	1930	51	55	56	73	921	856	121	91	759	839	1461	2091	602	819	2170	2621	3308	2490	1554	2880	496	746	474	842	404	504
Ec-00_005640	13	9	384	501	321	219	495	572	200	294	242	1033	981	360	1186	323	376	270	296	383	425	336	247	384	432	938	1345	478	410	1359	1515	936	816	949	1099	183	382	366	441	404	795
Ec-00_005650	7	6	16	23	2	2	15	0	396	597	782	525	600	668	1177	732	148	1689	1321	267	357	374	258	278	352	157	103	499	505	398	367	208	261	176	290	36	17	313	591	209	421
Ec-00_005660	201	137	47	92	63	30	44	34	63	88	46	101	144	50	128	135	50	83	90	33	58	94	53	209	216	60	48	240	269	56	76	74	100	58	91	25	23	59	95	108	197
Ec-00_005670	1	0	0	0	0	2	2	1	0	0	1	18	3	1	3	0	0	1	0	0	2	1	0	5	2	0	0	1	2	0	1	4	3	6	0	3	0	1	0	0	0
Ec-00_005680	62	46	3	19	13	12	30	13	301	315	465	7856	6853	4907	9727	519	869	1067	2392	2003	2500	505	422	2401	2566	2312	2969	1804	1694	3018	3522	8848	8042	8450	9901	2298	1157	813	1166	832	780
Ec-00_005690	0	1	1	6	7	2	1	5	16	17	23	206	217	157	324	2	1	15	61	60	59	7	1	0	0	0	0	1	0	0	0	435	234	240	253	61	30	0	0	0	0
Ec-00_005700	0	0	1	4	2	1	4	1	0	0	0	1	1	0	1	3	0	0	0	0	0	1	1	0	1	0	0	3	1	0	0	1	1	2	1	0	3	0	0	0	1
Ec-00_005710	0	0	1	2	1	4	5	0	0	0	0	7	2	1	6	1	0	0	1	5	1	0	0	5	3	3	10	1	2	19	6	14	18	11	18	4	4	6	22	3	4
Ec-00_005720	0	0	1	2	1	10	1	0	0	1	1	1	1	0	2	0	0	1	1	38	1	0	0	3	1	15	7	4	1	2	15	9	5	3	2	11	0	8	47	3	0
Ec-00_005730	0	1	2	13	4	11	8	2	2	0	1	33	44	17	45	8	0	0	0	43	51	1	0	16	3	27	22	11	17	57	42	170	106	84	38	11	18	27	28	19	22
Ec-00_005740	2	1	1	7	5	6	4	1	3	2	0	2	2	0	1	0	0	0	0	4	5	1	1	3	2	0	6	3	5	1	8	20	1	2	6	5	4	1	3	1	0
Ec-00_005745	0	0	1	0	0	2	4	0	0	0	0	0	0	0	0	0	0	0	0	1	2	0	0	0	3	0	1	0	1	0	0	0	0	1	0	0	0	0	1	0	0
Ec-00_005750	0	2	13	40	15	57	40	8	4	10	5	90	87	33	85	0	8	3	4	98	86	8	5	38	35	108	324	29	31	391	339	370	246	140	278	23	41	58	121	67	74
Ec-00_005760	17	13	0	5	8	0	3	3	1	0	0	110	139	20	57	6	0	0	4	44	37	2	0	60	38	15	17	40	64	40	30	98	184	96	180	20	1	15	19	55	88
Ec-00_005770	85	78	103	132	103	77	134	125	128	107	277	1450	1314	843	2450	264	266	286	277	211	463	164	119	515	388	270	196	379	497	313	356	399	434	454	233	95	71	249	277	151	163
Ec-00_005780	70	62	1814	2510	1405	2307	3743	2492	528	899	1072	3497	3609	1331	4398	1362	1317	1449	1203	1392	1455	1467	1118	1450	1583	4197	6840	1314	1070	4253	4557	4151	3134	2734	2546	313	1267	729	1170	928	1284
Ec-00_005790	1628	1223	719	767	826	376	561	575	552	610	448	1138	1320	848	1868	723	613	502	527	778	713	667	453	1296	1080	787	1000	1211	1304	1829	1731	1905	2136	1497	3390	311	374	577	1070	757	1147
Ec-00_005800	7	5	85	79	68	79	91	62	52	89	37	110	127	55	170	67	59	58	84	85	70	51	34	131	107	117	127	111	97	84	83	150	79	108	127	41	78	28	59	33	36
Ec-00_005820	15	17	12	10	10	52	79	53	394	323	261	929	1690	1972	4664	210	231	146	236	170	300	133	129	799	1114	652	567	528	462	181	272	289	217	276	3335	117	68	177	218	71	77
Ec-00_005810	0	11	15	9	4	27	19	7	41	36	47	38	23	34	87	2	0	3	4	2	2	0	0	35	34	2	4	42	28	3	1	27	23	15	49	7	2	0	1	0	1
Ec-00_005830	26	27	15	23	31	41	49	24	155	130	70	110596	128298	88706	77547	2334	1545	239	274	1608	3928	6341	5475	30768	50680	9776	2393	45872	48867	453	920	8313	25805	6458	18480	659	61	6837	5683	1960	990
Ec-00_005840	0	0	0	0	0	0	0	0	0	0	0	0	0	0	0	8	3	0	0	0	0	0	0	0	0	2	0	0	0	0	0	1	0	0	0	0	0	1	1	0	0
Ec-00_005850	87	78	141	115	78	124	214	101	695	815	480	2819	3608	2276	3778	604	307	757	761	1620	1430	594	444	833	969	769	1226	1172	1110	1403	1369	6233	6809	4581	7798	390	499	941	1567	691	1168
Ec-00_005860	0	0	0	0	0	0	1	0	0	0	1	3	1	2	3	0	0	0	0	3	6	0	0	0	0	0	0	1	0	0	0	0	0	1	0	0	0	0	0	0	0
Ec-00_005870	0	0	209	298	132	182	307	154	0	2	9	4	0	0	4	58	51	143	98	38	58	0	0	3	2	4	4	9	6	13	10	3	5	8	3	46	57	35	60	61	37
Ec-00_005880	0	0	0	1	0	4	17	0	0	1	1	389	286	408	1633	1	0	4	2	44	172	5	6	90	160	571	160	27	15	0	43	7	4	4	2	0	0	1	0	0	0
Ec-00_005890	1	5	100	156	108	353	237	124	32	156	128	498	674	297	627	153	225	269	216	375	288	61	32	100	63	214	415	79	92	418	537	780	760	398	681	52	104	171	330	306	639
Ec-00_005900	68	63	177	240	124	150	286	181	326	480	556	2030	2086	1073	2190	485	426	573	551	913	863	443	336	901	843	1606	2499	687	784	2265	2429	2306	2723	1600	3188	235	355	546	1059	671	1121
Ec-00_005910	16	22	135	232	93	72	118	129	51	78	52	349	151	78	412	217	181	133	177	135	162	99	63	129	206	591	580	184	96	490	578	68	59	183	113	133	131	53	87	65	87
Ec-00_005920	58	49	196	198	158	136	220	171	251	282	161	531	454	282	736	152	259	178	260	340	349	163	104	665	578	422	623	701	876	1036	1141	615	637	475	487	242	222	347	483	407	571
Ec-00_005930	89	63	1689	1710	1545	811	2420	2192	854	664	704	2603	2706	1119	3456	895	1454	509	577	747	740	840	498	1410	1168	1967	3436	879	1118	4067	4213	3511	3446	2573	2652	254	2218	783	631	1014	1078
Ec-00_005940	128	105	1841	1903	1372	1092	2866	2141	2722	1949	2383	9184	8808	3915	11084	1754	4127	1348	1208	2135	1939	3646	2787	4867	3168	11785	25605	1929	2455	16354	18534	11591	10120	8015	8776	670	4627	1783	1704	2750	3103
Ec-00_005950	81	50	1035	961	630	532	659	660	615	1079	648	903	659	223	742	858	957	649	690	673	595	255	142	341	257	976	1203	294	399	1379	1605	634	668	542	757	316	583	406	552	481	931
Ec-00_005960	28	20	2	11	11	1	2	2	5	6	4	1303	1477	432	1064	11	18	6	11	441	308	18	20	421	368	243	210	211	338	400	438	735	1308	867	1552	55	46	161	268	497	415
Ec-00_005970	116	82	501	593	413	228	284	403	267	439	316	953	1079	742	1140	169	236	195	265	398	443	176	154	939	682	299	353	883	885	637	641	1140	1242	635	1501	415	212	166	350	185	284
Ec-00_005980	0	0	0	0	0	0	0	0	0	0	0	0	0	1	0	0	0	0	0	0	1	2	0	5	4	0	2	0	0	0	0	1	0	0	0	0	0	2	3	0	0
Ec-00_005990	58	57	40	33	30	112	125	44	107	174	80	178	117	85	204	17	15	29	43	59	83	79	64	0	0	0	0	0	0	0	0	230	217	309	277	97	57	0	0	0	0
Ec-00_006000	0	0	2	1	0	1	2	1	0	0	0	1	0	0	2	0	0	0	0	0	0	0	1	0	0	0	0	0	1	0	0	1	2	0	2	0	0	0	0	0	0
Ec-00_006010	2	5	28	73	53	33	27	28	4	9	6	58	39	11	50	12	5	10	13	30	22	10	8	0	0	0	0	0	0	0	0	54	46	48	55	19	24	0	0	0	0
Ec-00_006020	3	0	1	1	1	4	1	1	4	1	1	2	0	1	5	3	0	1	0	2	2	0	0	0	3	0	1	3	8	1	1	11	6	10	1	4	1	0	3	2	1
Ec-00_006030	0	0	100	89	70	101	206	192	0	0	1	2	2	0	4	62	199	125	97	242	213	0	0	0	1	0	2	0	0	2	3	4	1	1	0	32	143	168	280	302	227
Ec-00_006040	36	24	505	593	523	498	1114	1185	543	759	908	3172	3476	1902	4686	645	1459	776	841	1473	1334	751	478	1287	786	2479	5910	725	1057	6682	7634	4540	4713	2823	4018	338	1170	1374	2077	1959	2065
Ec-00_006060	0	0	0	0	0	0	0	0	6	3	0	28	7	3	15	1	3	0	1	14	7	0	1	0	0	0	0	0	0	1	0	198	108	81	116	125	8	0	0	0	0
Ec-00_006070	0	0	0	0	0	0	0	0	0	0	0	0	0	0	0	0	0	0	1	0	0	0	0	0	0	0	0	0	0	0	0	0	0	0	0	0	0	0	0	0	0
Ec-00_006080	0	0	0	2	0	0	0	0	1	0	0	3	0	0	11	1	0	2	2	2	0	0	2	1	0	3	1	1	0	8	0	3	2	2	6	3	1	0	2	2	1
Ec-00_006090	0	0	0	1	0	0	0	0	0	0	0	1	0	0	0	0	0	0	0	0	0	0	0	0	0	1	0	0	0	0	0	0	0	0	0	0	1	0	0	2	0
Ec-00_006100	1	2	0	0	0	0	1	0	1	0	2	1	0	0	0	0	1	1	0	0	0	1	1	0	1	0	2	1	2	3	4	2	0	1	1	0	1	1	3	0	0
Ec-00_006120	0	0	0	0	0	0	2	0	0	0	5	0	0	1	0	1	0	0	1	2	1	0	0	0	0	0	2	2	0	2	0	0	2	0	0	0	0	0	3	1	0
Ec-00_006130	0	0	1	0	0	0	0	0	0	0	0	0	0	0	0	3	1	0	0	2	0	0	0	0	0	0	0	0	0	0	0	0	0	0	0	3	0	3	1	2	0
Ec-00_006140	0	0	0	0	1	1	1	0	0	0	0	0	0	0	0	0	0	0	0	1	0	0	0	0	0	0	0	1	0	0	0	0	0	0	0	0	0	0	0	0	1
Ec-00_006110	2	0	1	0	0	1	1	0	12	4	21	4	2	8	9	15	4	1	0	3	3	12	9	19	24	40	67	28	24	38	59	9	8	19	14	5	1	6	10	10	3
Ec-00_006170	0	0	0	0	1	0	1	0	0	0	0	0	0	0	0	3	2	3	1	6	1	0	0	0	0	0	0	0	0	0	0	0	0	0	0	10	3	3	4	1	5
Ec-00_006180	1	0	1	0	0	0	1	0	11	6	25	1	1	3	4	8	4	1	1	2	1	8	8	2	3	7	14	2	4	10	3	8	2	4	12	1	1	10	10	3	2
Ec-00_006190	1	0	0	1	0	1	1	1	8	9	32	0	0	0	3	4	1	0	0	1	2	4	7	4	4	14	18	2	1	5	12	5	2	2	5	2	3	5	6	0	5
Ec-00_006200	0	0	0	0	0	0	0	0	0	0	0	0	0	0	0	0	0	2	1	0	0	0	0	4	5	0	0	0	0	0	0	0	0	0	0	0	1	1	1	1	0
Ec-00_006210	2	0	9	2	2	1	1	1	0	0	1	0	0	0	0	0	0	0	0	0	0	0	0	0	0	0	0	2	0	0	0	0	0	0	0	0	0	0	0	0	0
Ec-00_006220	0	0	1	1	1	0	1	0	1	0	0	0	0	0	0	0	0	0	0	0	1	0	0	0	0	0	0	0	0	0	0	0	0	0	0	0	0	0	0	0	0
Ec-00_006230	0	0	1	2	0	0	0	0	0	0	0	0	0	0	0	0	0	0	0	0	0	0	0	0	0	0	0	0	0	0	0	0	0	0	0	0	0	0	0	0	0
Ec-00_006240	1	2	21	24	16	8	20	22	13	15	26	6	18	2	19	6	2	6	4	6	11	9	6	12	5	27	12	5	5	14	3	37	29	7	44	2	2	3	5	8	9
Ec-00_006250	0	0	0	0	0	0	0	0	0	0	0	0	0	0	0	0	0	0	0	0	0	0	0	0	0	0	0	0	0	0	0	0	0	0	0	0	0	0	0	0	0
Ec-00_006260	0	1	0	0	0	3	1	1	0	0	1	0	2	0	0	0	0	0	0	0	0	0	1	0	0	78	118	0	1	40	43	0	0	0	3	0	0	0	1	0	1
Ec-00_006270	1	2	1	0	2	1	1	0	0	5	25	9	24	60	193	35	34	26	18	6	9	41	35	93	33	432	597	9	12	188	221	36	38	57	44	19	44	0	3	11	4
Ec-00_006280	32	22	193	404	128	197	550	98	197	240	1107	91	148	175	1147	2266	1509	3936	1406	1434	1670	573	281	1108	514	786	6870	285	405	347	1660	667	398	341	176	291	2038	97	156	341	632
Ec-00_006290	79	39	168	119	133	132	343	65	381	507	2622	286	428	606	1176	1508	754	2160	1453	1132	1878	540	325	409	144	1782	2841	114	199	705	3131	814	763	561	490	109	1038	24	50	237	95
Ec-00_006300	382	327	222	358	235	553	483	86	903	1536	3496	817	2350	3366	7638	5913	3202	5263	3490	4128	3273	5346	4512	7189	5450	30539	35847	2062	2222	6065	7596	4640	2384	3118	2549	4355	8236	239	900	1017	299
Ec-00_006310	119	107	1365	1333	584	858	3163	968	2393	2711	11065	2344	2462	1414	4656	5961	6425	9127	6449	5773	5670	1693	753	3589	1305	14828	35938	834	1985	13793	18643	8368	6116	1674	1532	1358	8699	419	965	1664	1215
Ec-00_006320	2	2	70	72	53	78	83	87	124	144	82	135	105	74	151	114	104	73	77	59	69	76	59	54	77	131	127	59	57	123	106	76	71	95	121	53	108	42	60	28	67
Ec-00_006330	0	0	0	2	0	0	1	0	1	0	0	0	0	0	1	0	0	0	0	0	1	1	0	0	0	0	0	3	0	0	0	0	0	0	0	0	1	1	1	0	0
Ec-00_006340	363	283	45	307	108	112	190	103	61	57	294	393	312	361	3027	182	455	277	408	10001	6977	5506	3428	7925	3971	14947	47267	3566	7036	54306	72345	41301	30441	14412	19177	2742	4923	4943	6199	7656	6261
Ec-00_006350	190	170	1099	1334	467	1375	3721	546	3432	4542	23385	6853	13264	9019	25752	30655	15228	37951	22179	17551	16838	15477	11071	21686	15942	108050	142598	8857	9999	61728	63944	22552	15141	8544	5378	7690	24563	973	3662	3411	2859
Ec-00_006360	2	4	121	301	129	876	940	265	7	8	21	0	6	1	0	171	172	527	494	316	482	1	0	6	5	0	0	4	3	0	0	1	3	0	2	615	390	425	1052	246	307
Ec-00_006370	271	162	78	145	54	367	892	250	937	538	6125	753	4519	442	632	82	117	326	320	264	261	197	159	1943	1894	336	303	3006	2325	535	280	1383	1196	303	1368	170	277	161	362	94	162
Ec-00_006380	57	41	33	67	54	209	596	140	259	208	2376	158	1303	122	135	11	20	212	156	114	116	56	29	388	321	77	75	426	338	408	230	567	604	132	431	36	118	130	295	101	185
Ec-00_006390	6	7	18	2	7	16	17	13	6	0	2	82	9	9	16	13	6	4	5	15	5	1	0	25	37	33	82	7	27	23	38	19	8	3	0	1	4	4	1	11	4
Ec-00_006400	0	0	8	5	6	21	34	18	2	0	0	1	14	16	18	1	2	0	2	12	9	0	1	56	61	8	114	24	30	41	61	2	13	1	0	0	7	4	0	11	4
Ec-00_006420	15	17	254	260	259	227	555	391	179	227	326	1256	1792	794	1856	463	423	351	324	761	630	285	188	504	494	1191	2083	436	528	1604	1925	2243	2319	1214	1818	202	463	406	649	682	891
Ec-00_006430	1	3	0	0	1	0	2	1	6	1	12	14	8	2	7	6	7	4	5	6	5	4	2	11	7	23	21	6	16	8	12	17	18	13	14	5	7	0	3	2	5
Ec-00_006440	0	0	5	17	5	13	11	7	0	0	0	0	0	1	6	2	4	0	2	0	1	0	0	0	0	0	0	0	1	0	0	1	0	1	1	1	0	0	0	2	0
Ec-00_006450	1	1	0	0	0	0	0	0	0	3	4	273	321	102	190	9	3	47	42	17	39	16	14	0	0	0	0	0	0	0	0	21	8	93	13	2	1	0	0	0	0
Ec-00_006460	11	7	3	7	7	14	10	4	2	5	2	15	11	5	20	2	1	10	2	4	3	10	7	13	27	0	2	14	21	2	5	13	8	8	17	0	6	0	0	0	0
Ec-00_006470	43	31	327	278	274	159	346	334	239	408	296	1038	939	387	1260	385	257	296	302	520	413	250	167	310	331	848	1119	285	318	1137	1523	989	1281	1017	1445	136	316	312	473	609	1029
Ec-00_006480	345	270	16	30	21	37	22	23	7	22	23	20	30	82	121	7	6	26	49	14	31	21	12	125	121	18	17	170	151	96	47	42	35	76	59	18	8	6	6	10	10
Ec-00_006490	189	156	6	11	10	17	8	6	0	0	0	1	1	3	13	0	0	0	2	0	6	0	0	3	1	2	0	1	7	3	9	2	9	24	9	9	2	2	1	4	0
Ec-00_006500	22	16	0	12	3	52	35	13	9	19	34	62	70	63	190	21	12	35	19	12	13	1	3	0	1	0	0	1	0	0	0	154	114	45	50	25	4	0	0	0	0
Ec-00_006510	0	0	0	0	0	1	0	1	0	0	0	0	0	1	4	0	1	0	0	0	0	0	1	0	0	0	0	0	0	0	0	0	0	0	0	0	0	0	0	0	0
Ec-00_006520	3	0	241	273	219	221	364	257	424	650	911	356	336	172	524	523	437	358	357	458	406	106	58	618	309	818	809	364	427	825	907	443	449	319	390	513	404	295	524	414	816
Ec-00_006530	469	318	810	1075	654	492	1132	753	934	888	803	1767	1623	706	2176	1167	849	1001	899	1065	1102	706	410	1409	1191	1168	1999	1088	1519	1980	2280	1655	2007	1098	1721	405	461	521	792	760	1355
Ec-00_006540	228	182	305	460	257	323	534	359	306	345	250	2475	2841	1672	2993	585	491	530	612	503	653	682	554	1192	1572	1507	1654	1536	1490	2199	2032	1855	1701	1707	2440	200	344	301	403	285	661
Ec-00_006550	18	14	369	583	329	173	276	375	100	192	141	532	496	206	519	148	209	131	181	201	251	185	106	273	205	448	479	249	270	977	1004	378	352	380	486	78	244	153	256	159	220
Ec-00_006560	9	2	179	268	220	238	399	389	271	271	246	829	956	330	765	214	190	214	233	331	281	161	121	724	530	247	233	465	755	349	364	800	934	413	572	136	140	168	262	194	341
Ec-00_006570	438	360	733	1011	872	652	2135	1048	1415	1306	1001	15834	12462	6311	35789	1705	2074	1318	1307	23099	21060	1157	705	30049	13367	27481	72387	12811	17629	45760	52986	71661	54743	39295	27755	6939	15047	5550	13586	12746	10293
Ec-00_006580	11	7	152	229	103	180	241	260	688	716	191	788	717	456	960	233	208	129	142	272	299	133	116	845	580	352	546	524	890	573	623	1126	948	1060	762	254	527	192	214	239	166
Ec-00_006590	34	25	25	18	11	14	589	6	4	4	1	31728	24626	12870	81703	1008	726	189	152	4096	12289	548	382	8187	7440	16014	18181	4884	5596	11264	15804	18525	13570	21951	9144	2253	4546	1808	2844	2636	3526
Ec-00_006600	15	14	3	2	1	10	12	2	61	45	23	4707	5308	3853	6622	1535	945	980	1027	436	818	432	414	1414	2008	1090	290	960	1348	191	229	527	688	1052	169	615	284	228	179	109	83
Ec-00_006610	8	5	125	82	44	204	345	112	344	600	296	820	578	280	783	547	300	372	357	601	526	178	147	536	513	745	867	566	563	879	914	783	893	776	986	338	371	337	529	528	1100
Ec-00_006620	8	3	21	28	34	113	413	102	85	163	216	1978	2325	881	2683	862	726	732	595	1545	1322	321	247	455	499	1903	3435	443	520	2264	2754	2774	2819	2102	1583	255	378	752	1178	1404	2291
Ec-00_006625	0	0	0	0	0	0	0	0	0	0	0	0	1	0	0	0	0	2	1	1	0	35	20	3	1	0	1	0	2	1	1	4	0	1	2	0	0	0	2	1	0
Ec-00_006630	341	261	302	257	205	195	380	216	174	206	196	889	1174	558	1178	268	323	294	332	516	462	219	177	318	250	453	847	265	367	1046	1114	1189	1438	764	1336	76	120	283	447	375	321
Ec-00_006640	73	55	466	595	458	434	670	827	220	417	418	3983	3819	1796	5104	348	717	588	575	1152	1098	586	389	534	489	1569	2395	488	475	2476	2894	4106	3914	3332	3976	403	1062	479	825	582	891
Ec-00_006650	17	9	63	90	74	97	173	129	127	117	73	565	756	422	846	157	124	169	166	243	234	168	146	355	460	326	472	444	434	614	514	974	967	724	1384	132	116	123	219	143	318
Ec-00_006660	98	82	990	1241	596	1279	1465	928	1226	1337	1461	3396	3289	1728	4916	1807	1260	1473	1428	1207	1294	1469	1114	3924	4095	3395	4931	2871	3617	3874	4306	3245	3125	3195	3288	676	2152	759	877	876	1142
Ec-00_006665	5	10	24	35	18	26	18	17	7	21	2	315	400	72	264	11	18	11	6	130	91	7	6	389	183	134	73	83	137	75	83	368	321	128	448	63	71	19	51	54	29
Ec-00_006670	230	216	66	88	88	80	78	88	77	165	76	113	146	105	238	72	34	67	66	72	62	40	38	126	88	55	50	71	121	36	38	175	162	101	199	43	48	14	30	21	26
Ec-00_006680	3	3	5	6	5	5	7	4	5	2	12	91	94	88	16	23	0	2	4	20	18	4	4	34	30	3	4	18	63	3	13	30	84	25	32	4	0	31	37	7	41
Ec-00_006690	1011	839	1632	1806	1599	987	1310	1365	1097	1407	3111	3170	4745	1872	4349	883	955	653	666	1559	1479	725	571	4985	3613	3611	4970	3240	5695	5926	5713	5909	6245	2518	5706	936	1452	1404	2828	1201	2835
Ec-00_006700	11	2	83	131	71	60	134	128	39	58	107	403	453	195	531	45	112	55	82	161	180	125	87	165	143	404	595	119	86	936	1068	544	532	467	853	72	239	196	296	185	336
Ec-00_006720	6	2	165	135	96	151	275	123	130	174	223	790	803	311	735	207	243	135	135	321	323	149	84	293	290	718	871	210	348	945	1009	1018	1298	669	1464	199	350	288	483	385	1096
Ec-00_006740	78	62	500	617	325	505	481	353	408	371	349	1276	1424	672	1451	521	363	357	370	302	411	383	365	1250	1531	706	522	1614	1459	623	669	1005	940	927	1322	382	392	239	316	293	538
Ec-00_006750	11	7	41	47	39	18	40	33	22	35	36	95	76	42	87	26	44	24	34	30	44	50	42	37	84	53	76	54	39	92	92	70	81	63	81	22	43	29	58	22	57
Ec-00_006760	8	7	100	182	73	110	91	71	98	402	44	223	214	91	207	135	93	70	72	93	87	71	53	229	195	438	480	189	179	184	192	182	138	126	144	115	195	39	55	28	30
Ec-00_006770	41	35	543	544	309	641	1149	689	1169	1107	1270	2996	2866	1230	3152	1939	896	1589	1293	1471	1524	894	670	3557	3299	3146	4026	2604	2958	2446	2780	3480	2845	2066	1848	1424	1671	590	923	670	956
Ec-00_006780	18	18	16	17	16	8	15	7	4	6	1	387	325	35	77	8	7	1	4	54	36	2	3	239	134	14	4	99	144	74	77	188	357	222	166	26	12	58	44	104	102
Ec-00_006790	3566	2852	369	786	611	464	349	402	281	346	330	1030	1115	454	891	420	334	323	376	478	535	273	198	781	681	569	670	626	771	822	859	1016	1021	667	1493	213	505	298	447	310	498
Ec-00_006800	130	118	359	239	276	153	285	257	297	286	210	183	185	72	274	305	182	276	256	224	171	84	42	248	197	285	319	215	322	252	337	201	289	127	204	140	214	67	118	98	123
Ec-00_006810	344	264	1075	1171	905	705	1144	1145	514	675	623	1506	1331	568	1711	939	1002	540	579	714	699	535	326	635	494	1174	1239	501	597	1496	1608	1419	1404	1202	1312	289	667	375	491	636	835
Ec-00_006820	0	0	2	3	0	8	0	0	0	0	2	0	0	0	2	0	0	0	1	0	0	0	0	1	1	0	0	0	0	0	0	0	0	1	1	0	0	0	0	0	0
Ec-00_006830	11	17	147	183	134	195	183	108	6	11	7	6	8	1	14	45	25	38	42	45	41	2	3	8	5	0	0	1	4	6	3	4	10	1	14	57	33	18	42	54	69
Ec-00_006840	4230	3560	1243	1693	1180	1338	1571	999	607	1222	613	1754	1861	1028	2997	825	465	794	903	843	764	555	427	2551	1897	1344	1213	1128	1420	1009	916	2347	1865	1411	2888	926	362	301	847	478	840
Ec-00_006850	2	5	51	57	25	66	45	31	0	1	0	3	3	2	5	33	16	38	32	32	32	0	1	2	0	0	5	3	1	7	2	1	4	4	4	53	23	8	21	16	8
Ec-00_006860	654	601	119	187	105	111	139	95	83	128	97	198	318	150	223	143	61	131	128	77	103	100	88	269	267	201	228	146	160	162	143	222	197	136	285	69	47	22	38	58	75
Ec-00_006870	6	3	563	744	532	515	949	1127	184	252	420	975	884	447	1354	399	283	307	280	490	476	310	212	678	677	1131	2246	412	462	1458	1808	856	751	706	779	317	179	255	481	389	810
Ec-00_006880	21	16	156	251	138	224	311	151	307	347	285	472	413	223	639	325	250	239	251	250	236	195	123	651	664	411	416	551	684	579	517	499	549	323	607	288	229	215	327	213	463
Ec-00_006890	91	84	619	665	451	765	660	389	281	440	471	506	463	296	566	444	167	327	333	322	356	251	203	456	370	372	402	334	325	356	338	621	655	412	1192	344	230	182	424	166	383
Ec-00_006900	5688	4892	2338	2918	2399	2992	2486	1909	2139	3310	2676	5871	8195	6234	11907	3227	2295	3065	3220	2862	2806	1269	1101	9061	7574	8525	9671	5269	7578	6927	7953	7007	6209	5272	8172	2130	1104	1523	2638	1991	2098
Ec-00_006910	438	408	110	86	92	106	100	75	71	138	108	194	641	417	662	86	68	105	79	112	59	26	20	319	201	156	265	94	204	176	194	634	525	214	448	51	26	27	59	63	25
Ec-00_006920	0	0	1	1	3	3	1	1	0	0	0	2	0	0	0	2	3	1	2	2	3	0	1	1	0	0	0	0	0	0	0	0	0	0	0	2	2	0	1	3	1
Ec-00_006925	0	0	2	4	0	2	3	1	0	1	0	0	0	0	3	0	0	1	0	2	0	3	0	7	8	0	3	6	6	0	1	0	4	1	2	0	0	0	1	1	0
Ec-00_006930	14	13	13	13	5	5	3	7	2	7	0	77	94	729	1048	19	8	0	0	36	44	27	28	11	17	5	1	15	33	0	36	1	5	0	3	0	0	0	1	1	1
Ec-00_006940	143	129	99	80	64	49	81	55	52	58	40	177	227	215	385	125	32	118	118	112	100	139	111	231	291	179	258	217	170	106	145	305	288	131	324	69	11	25	56	24	34
Ec-00_006950	1684	1264	1039	1196	957	790	1306	861	1533	2149	1735	2839	3624	1981	3469	1087	945	1518	1749	1811	1785	792	516	984	911	1017	1290	939	1162	3053	2919	4006	5121	1864	4602	338	458	1700	2935	1830	3456
Ec-00_006960	28	24	4473	12660	4815	1399	4790	6570	619	736	701	2427	2274	292	1083	4992	3362	311	297	68	85	8050	5813	460	134	1682	4492	118	117	961	1360	246	213	52	81	7	14	8	8	182	26
Ec-00_006970	7	9	153	156	108	163	154	108	97	169	163	135	170	83	178	179	125	131	114	109	116	33	28	87	46	145	174	41	94	157	180	170	186	104	138	66	102	47	73	38	140
Ec-00_006980	0	1	2	3	2	0	0	3	0	0	1	0	0	1	0	0	0	0	0	0	0	0	1	0	1	0	1	0	0	1	0	2	0	0	0	0	0	0	0	0	0
Ec-00_006990	7	4	38	57	68	67	59	55	49	106	66	215	220	106	277	86	80	54	101	132	131	61	44	151	96	247	502	67	102	367	439	262	306	138	332	58	79	52	99	82	124
Ec-00_007000	15	23	150	177	195	91	127	119	111	136	82	410	348	245	594	314	271	350	344	704	708	59	37	144	105	573	684	93	177	504	540	419	472	361	228	84	497	174	268	238	440
Ec-00_007010	5	6	1	8	4	1	4	0	1	0	2	6	5	0	13	3	0	0	2	2	2	0	0	4	10	9	4	3	3	5	5	5	3	7	13	0	0	0	2	1	0
Ec-00_007020	8	1	6	10	6	10	7	4	8	12	8	11	15	6	15	6	3	8	7	3	6	0	0	19	15	2	6	10	21	7	6	11	15	8	11	8	1	4	11	5	8
Ec-00_007030	2	1	28	23	14	31	103	17	68	80	49	112	90	57	91	48	17	39	52	77	67	32	29	130	140	71	101	123	134	116	101	117	148	95	280	88	34	45	58	47	61
Ec-00_007040	0	0	0	0	0	0	0	0	0	0	0	0	0	0	0	1	0	0	0	0	0	0	0	0	0	0	0	0	0	0	0	0	0	0	0	0	0	0	0	0	0
Ec-00_007050	37	22	236	296	248	183	541	554	210	289	635	2649	2764	1568	3674	261	679	368	392	813	662	405	316	1173	986	1026	3222	672	1133	3967	5151	3347	3869	2357	3604	188	316	909	1321	1488	1506
Ec-00_007060	42	36	164	260	177	156	398	391	202	260	458	1758	1749	1331	2871	398	587	420	406	585	576	546	410	1583	1437	1402	2499	1080	1487	3198	3579	1969	1969	1817	2682	335	517	673	1034	973	889
Ec-00_007070	0	0	0	0	0	0	1	0	0	0	0	0	0	0	0	0	0	0	0	0	0	0	0	0	0	0	0	0	0	1	0	0	0	1	0	0	0	0	0	0	0
Ec-00_007080	2	0	0	0	0	0	1	0	0	0	0	4	1	5	2	0	0	0	0	0	1	13	6	50	20	0	0	0	0	0	0	3	2	1	1	0	0	0	1	0	0
Ec-00_007090	0	0	0	0	0	0	0	0	0	0	0	0	0	0	0	0	0	0	0	0	1	0	0	0	0	0	0	0	0	0	0	0	0	0	0	0	0	0	0	1	0
Ec-00_007095	0	1	1	0	0	3	1	0	0	0	0	1	0	0	1	0	5	0	1	1	0	14	10	55	18	1	0	22	12	0	0	3	1	4	2	0	0	0	0	1	0
Ec-00_007097	0	0	0	0	0	3	9	0	0	0	2	60	47	56	155	0	0	1	0	1	12	17	22	16	33	28	3	3	8	1	5	1	0	1	0	0	0	0	0	0	0
Ec-00_007098	0	0	0	0	0	0	0	0	0	0	0	52	53	96	165	0	0	1	1	2	5	0	2	7	14	42	11	4	2	0	3	0	0	0	0	0	2	0	0	4	1
Ec-00_007099	0	0	0	0	1	0	0	0	0	0	0	16	3	10	19	0	0	0	0	0	0	0	0	8	11	0	0	3	0	0	1	0	1	2	0	0	0	0	0	0	0
Ec-00_007100	0	0	1	1	3	3	4	0	0	0	0	0	1	1	2	0	0	0	0	0	0	1	1	1	1	0	0	1	0	0	0	0	0	0	0	0	0	0	0	0	0
Ec-00_007110	600	447	7	201	98	23	30	63	2	6	15	340	178	4	7599	99	53	633	1269	48108	35282	1	1	36643	22156	91096	212402	16767	23221	110123	146532	124285	86541	67298	41822	16566	36692	16993	37062	41823	52418
Ec-00_007120	0	0	0	0	0	0	0	0	0	0	0	0	0	0	0	0	0	0	0	0	1	0	0	0	0	0	0	0	0	0	0	0	0	0	0	0	0	1	0	0	0
Ec-00_007130	27	15	2	3	7	10	4	6	1	2	3	90	82	18	220	4	0	9	14	330	278	5	1	112	116	233	423	36	33	201	286	1385	496	525	765	545	147	18	63	49	30
Ec-00_007140	91	66	356	188	135	221	332	196	241	355	149	467	389	217	617	96	110	26	59	97	149	70	47	530	332	337	350	444	509	789	791	313	475	368	585	35	154	171	143	205	196
Ec-00_007150	499	429	3178	2730	1252	3468	3373	1691	4178	4631	4056	1752	2172	1764	2841	2126	974	2377	2186	1145	1259	2146	1737	8045	5100	1406	1469	3928	4797	1087	1367	4619	3956	1096	3715	866	515	269	484	499	371
Ec-00_007160	64	52	895	983	808	1125	1646	1392	1601	2649	2264	3688	3160	1937	4790	2954	1466	1803	1820	1851	1751	1496	1136	5036	4434	4461	4163	4033	5757	4909	5395	3816	3666	2701	4324	2057	1863	1496	2857	1957	5005
Ec-00_007170	0	0	1	0	0	2	17	0	0	0	0	497	439	247	862	2	3	6	1	51	192	2	2	12	24	143	64	13	5	1	20	4	0	0	0	0	0	0	1	0	0
Ec-00_007180	0	0	0	3	0	0	0	0	0	1	0	2	1	1	6	0	0	0	0	0	0	1	0	1	0	0	0	0	0	0	0	0	0	0	0	0	0	0	0	0	0
Ec-00_007190	154	173	25	89	29	25	26	8	3	5	0	0	6	0	0	1	0	3	0	1	2	0	0	8	4	7	0	1	6	2	7	0	0	1	1	0	6	2	2	1	0
Ec-00_007200	0	0	0	0	0	0	0	0	0	0	0	0	0	0	0	0	0	0	0	0	0	0	0	0	0	0	0	0	0	0	0	0	0	0	0	0	0	0	0	0	0
Ec-00_007210	1	0	11	9	8	7	2	3	4	1	2	36	38	105	262	16	47	10	7	22	20	16	16	2	2	5	1	0	0	1	3	0	0	7	2	20	144	1	1	0	3
Ec-00_007220	0	0	15	12	5	4	7	7	3	0	0	0	1	0	2	0	0	2	1	0	0	0	1	0	0	0	0	2	0	0	0	0	0	0	0	0	0	0	0	0	1
Ec-00_007230	16	13	0	0	1	0	0	0	0	0	0	0	0	0	0	0	0	0	0	1	0	0	0	0	2	0	0	0	1	0	0	0	1	1	6	0	0	1	1	2	1
Ec-00_007240	2	3	55	99	66	100	102	113	101	138	66	206	196	146	334	68	34	62	57	80	94	32	32	257	282	272	268	179	207	231	236	329	293	264	384	99	90	58	49	54	65
Ec-00_007245	11	6	225	459	298	570	448	482	172	274	249	455	532	272	632	108	101	169	174	198	167	59	66	352	238	461	768	136	179	600	590	782	532	415	845	154	152	70	147	88	94
Ec-00_007250	0	0	16	18	30	55	106	71	328	370	2512	6453	12724	1845	3341	3815	2765	5606	3889	320	356	4748	3789	6	26	54	17	29	44	22	20	88	55	45	12	21	16	17	15	9	9
Ec-00_007260	0	1	2	2	3	0	0	1	1	0	0	1	4	4	4	0	0	1	0	2	0	3	5	14	6	1	0	10	14	1	1	8	10	7	6	1	1	1	0	0	1
Ec-00_007270	0	0	1	2	0	1	1	2	0	0	3	4	9	1	1	0	0	1	0	1	2	2	0	4	1	2	1	2	3	8	4	14	37	0	27	5	5	3	5	1	2
Ec-00_007280	2	4	22	23	24	60	72	24	50	63	50	174	196	160	302	106	33	95	85	104	119	48	50	307	225	134	113	180	242	197	170	321	292	180	350	110	44	50	80	68	95
Ec-00_007290	4	4	31	115	45	55	82	60	19	74	9	15	37	2	19	11	3	10	8	35	25	7	3	56	14	7	5	19	42	3	3	38	57	12	16	25	14	10	16	9	41
Ec-00_007300	3	6	0	1	3	0	3	2	11	24	10	153	168	29	75	24	2	10	16	63	53	9	7	93	109	105	108	81	112	136	142	94	159	154	147	86	23	36	87	51	77
Ec-00_007310	18	16	4	15	10	8	2	8	0	1	2	881	807	170	675	14	10	11	12	460	365	4	7	133	149	212	186	117	169	422	451	609	1205	730	1093	47	21	156	269	638	897
Ec-00_007320	3970	3348	534	847	659	468	520	470	131	200	146	1185	1470	639	1229	269	337	186	264	371	418	326	282	501	511	640	826	485	457	1019	1056	800	874	815	1548	111	163	202	308	248	296
Ec-00_007330	258	281	546	835	529	612	630	479	510	653	377	2714	2929	1642	3253	651	513	606	776	673	893	842	704	1666	2154	1064	1217	2444	2107	2097	2032	1953	1878	2500	2835	378	365	431	623	471	219
Ec-00_007340	125	87	1232	2390	1177	2458	3171	1538	2016	2320	1781	6056	6338	3593	7952	3774	2203	3009	2903	2859	3042	2698	1910	11113	11208	9502	9623	10487	11595	9723	9658	6451	6770	5494	7630	2873	2661	1409	1980	1738	1566
Ec-00_007350	6	1	108	145	86	145	275	167	74	91	83	691	554	231	815	161	164	146	180	226	247	147	102	357	411	315	403	419	461	543	599	727	736	481	551	130	227	139	209	187	235
Ec-00_007360	0	1	0	0	0	3	4	0	14	8	4	12	42	12	12	5	10	18	23	3	1	8	4	0	2	0	0	0	0	0	0	2	0	1	0	1	0	0	0	0	0
Ec-00_007370	0	0	1	1	1	1	1	1	11	23	14	54	91	72	52	71	28	36	62	8	7	53	9	13	13	0	0	8	23	4	7	14	6	1	1	0	0	0	2	0	0
Ec-00_007380	32	23	1068	383	306	734	1494	1155	660	937	1053	1144	1518	694	1640	857	1148	885	740	701	618	517	285	688	273	1550	3121	216	644	1507	1999	1193	1166	618	969	187	880	306	289	479	739
Ec-00_007390	10	9	338	369	300	223	303	250	253	344	139	360	407	157	461	132	256	108	137	189	215	79	53	289	210	473	609	241	253	664	719	361	334	263	303	122	257	116	154	126	193
Ec-00_007410	3728	2910	71	361	854	331	228	357	79	49	59	671	920	431	960	103	86	98	103	254	279	54	28	678	538	462	486	512	547	1111	1102	1092	1325	1065	1475	70	125	312	399	319	425
Ec-00_007400	0	0	0	5	0	0	3	0	0	0	0	0	0	0	0	0	0	0	0	0	0	0	0	0	0	0	0	0	0	0	0	0	0	0	0	0	0	0	0	0	0
Ec-00_007420	0	0	6	2	3	3	0	4	0	1	0	1	1	0	2	0	0	5	2	2	1	0	0	41	76	3	12	119	183	102	88	3	0	0	3	4	2	63	111	51	62
Ec-00_007430	37	29	312	626	220	263	476	304	207	322	768	717	915	805	1499	169	190	874	839	705	606	133	126	12	20	0	2	18	7	9	10	903	1102	1480	1193	132	181	39	42	5	5
Ec-00_007440	10	5	5	7	10	7	11	7	9	34	30	26	27	10	32	22	8	10	15	10	10	15	15	21	27	16	21	22	30	17	28	36	26	27	50	24	13	4	6	5	6
Ec-00_007450	0	0	0	0	0	0	0	0	0	0	0	0	0	0	1	2	0	0	0	0	0	1	2	0	3	7	2	0	1	0	0	1	0	0	0	0	0	0	0	0	0
Ec-00_007460	0	0	7	0	1	20	194	1	15	16	5	4598	3640	1384	4089	14	5	32	20	144	699	32	35	457	1009	672	325	259	198	0	58	28	12	2	1	0	0	1	0	1	3
Ec-00_007470	0	0	0	0	0	0	0	0	0	0	0	0	0	0	0	2	0	0	1	3	4	0	0	0	0	0	0	0	0	0	0	0	0	0	0	0	0	0	0	0	1
Ec-00_007480	77	65	257	261	148	216	290	168	1051	1135	276	809	690	197	502	268	431	127	133	293	288	165	160	141	131	866	1812	291	210	599	647	714	633	661	568	106	541	111	177	172	163
Ec-00_007490	0	0	0	1	1	0	0	1	0	0	0	0	0	0	0	0	0	0	0	0	0	0	0	0	0	0	0	0	0	0	0	0	0	0	0	0	0	0	0	0	0
Ec-00_007500	0	0	2	1	1	1	1	1	0	0	0	0	0	0	0	0	0	1	0	0	0	0	0	0	0	0	0	0	0	0	0	0	0	0	0	0	0	0	0	0	0
Ec-00_007510	0	0	1	3	0	0	2	1	0	0	0	0	0	0	0	0	0	0	0	0	0	0	0	0	1	0	0	0	0	0	0	0	0	0	0	0	0	0	0	0	0
Ec-00_007520	0	0	2	4	4	0	2	0	0	0	0	0	0	0	0	0	0	0	0	0	0	0	0	0	0	0	0	0	0	0	0	0	0	0	0	0	0	0	0	0	0
Ec-00_007530	14	10	24	24	25	95	62	56	41	74	33	393	399	118	252	89	36	72	57	85	79	56	44	158	226	168	118	122	154	129	109	265	371	229	279	43	21	49	63	69	66
Ec-00_007540	3	5	69	58	31	47	75	51	30	45	32	175	162	54	171	74	33	58	51	61	67	57	63	52	90	97	126	85	65	107	116	170	173	128	231	31	38	27	69	42	21
Ec-00_007550	11	7	109	110	60	81	104	59	80	146	180	434	441	171	304	17	110	112	131	59	77	43	50	14	17	16	13	13	13	31	36	56	98	131	157	8	10	28	21	31	49
Ec-00_007560	6	11	13	7	1	9	18	12	19	37	23	133	140	79	175	44	33	44	47	23	26	22	22	20	20	21	20	22	20	15	24	54	43	79	65	21	15	1	7	2	8
Ec-00_007570	1	0	11	18	2	31	9	13	0	1	0	1	0	0	1	37	13	23	18	17	24	0	1	0	0	0	0	0	0	0	0	0	0	0	0	16	9	5	1	1	4
Ec-00_007580	20	20	17	29	40	9	8	20	0	1	3	38	58	36	108	2	1	0	0	11	15	5	1	107	55	6	15	15	39	6	17	56	65	17	40	15	7	3	5	12	15
Ec-00_007590	66	57	881	1048	712	645	1110	1159	303	482	533	2423	2610	967	2520	348	810	507	504	809	768	444	342	705	507	1100	2337	425	630	2520	3164	2281	2135	1707	2266	184	475	739	1028	1117	1310
Ec-00_007600	22	7	18	25	20	61	57	32	58	90	55	15	20	3	241	2	1	11	45	1055	746	0	0	996	824	852	1545	643	1227	2166	2164	3797	2986	1903	3485	444	579	751	1316	1142	2590
Ec-00_007610	44	30	166	164	111	372	399	200	672	1230	971	1535	1802	1267	2455	608	430	1081	1084	650	642	290	252	1926	1659	1063	806	1134	1712	1230	1056	1937	1329	1187	2665	1142	588	434	802	334	496
Ec-00_007620	0	0	0	0	0	0	0	0	0	0	0	0	0	0	0	0	0	0	0	1	0	0	0	0	0	0	0	2	0	0	0	0	0	0	0	0	0	0	0	0	0
Ec-00_007630	10	23	206	189	117	90	302	107	831	943	241	1386	1709	265	352	33	33	94	56	232	225	235	206	1170	1437	138	1172	151	84	365	1252	202	229	96	73	112	199	7	10	303	254
Ec-00_007640	39	41	139	190	79	189	215	118	191	362	188	732	649	246	704	305	231	247	280	205	237	248	199	649	667	608	639	526	541	470	525	538	415	367	391	223	281	94	143	90	68
Ec-00_007650	3	4	0	2	1	0	1	0	0	0	0	1	0	0	10	0	0	3	1	101	60	0	0	85	101	35	120	192	84	83	110	529	339	214	388	138	21	31	50	31	75
Ec-00_007660	0	0	0	0	0	0	0	0	0	0	0	0	0	0	3	0	0	0	1	1	0	0	0	0	2	0	1	3	1	4	0	3	1	14	6	0	0	0	2	0	1
Ec-00_007670	0	0	2	4	2	12	12	9	8	9	8	33	15	13	20	17	9	2	9	9	3	3	6	16	8	27	24	24	24	16	20	18	11	18	18	9	2	5	5	3	3
Ec-00_007680	1	4	3	9	8	49	51	26	67	78	50	164	133	83	216	94	67	64	79	83	92	12	20	83	74	261	278	70	88	229	265	137	128	175	114	89	79	50	62	75	74
Ec-00_007690	4	4	0	3	3	0	0	0	0	0	0	6	6	4	13	0	0	0	0	0	2	1	0	0	1	6	0	0	3	4	7	4	6	10	3	2	4	0	0	2	0
Ec-00_007700	21	9	35	26	16	23	15	24	15	18	44	34	57	33	54	13	21	3	19	23	13	13	4	5	13	16	41	5	6	60	59	59	56	41	58	6	23	13	15	18	29
Ec-00_007710	93	75	304	346	229	213	318	260	276	346	650	394	319	163	477	225	153	185	200	186	227	153	98	310	309	441	468	335	392	503	552	426	426	276	382	149	287	114	150	147	185
Ec-00_007720	207	156	147	155	189	141	271	118	1722	977	1436	3558	3318	3791	11567	1308	3862	755	679	1075	948	2772	1811	4923	2858	6268	11010	1869	2746	8588	9350	4121	3955	6131	5774	733	5938	1512	692	1963	1896
Ec-00_007730	30	14	336	303	239	245	430	306	100	222	118	293	324	149	300	171	97	135	124	90	144	115	86	348	426	224	235	389	414	221	226	277	239	222	285	99	67	66	65	60	33
Ec-00_007740	1006	774	1790	2024	1255	1353	1959	1668	1364	1309	1295	3487	3154	2069	4669	1349	1337	1067	995	872	976	1514	1092	2184	2138	2612	4189	1816	1957	2841	3236	2423	2173	2435	3024	546	1336	810	997	859	1301
Ec-00_007750	21	25	175	243	192	151	188	200	59	57	38	689	593	334	673	77	103	62	92	245	252	133	105	256	339	278	377	378	307	1442	1463	951	893	922	1157	109	128	309	525	309	281
Ec-00_007755	0	0	0	0	0	0	0	0	0	0	0	0	1	0	0	0	0	0	0	1	0	0	0	1	0	2	0	0	1	1	0	1	1	0	0	2	0	1	1	0	0
Ec-00_007760	0	0	3	1	0	0	1	0	1	0	0	2	1	0	2	0	0	0	1	0	0	5	3	0	0	0	0	0	0	0	0	4	1	6	1	2	0	1	0	0	0
Ec-00_007765	0	0	0	0	0	0	0	0	0	0	0	3	9	1	0	1	1	1	1	0	2	0	1	0	0	0	0	0	0	0	0	0	2	0	0	0	0	0	0	0	0
Ec-00_007767	0	0	0	1	0	0	1	0	1	0	2	29	48	18	27	2	1	0	0	0	4	7	14	7	16	8	2	3	0	0	2	1	0	1	0	0	0	0	0	1	0
Ec-00_007768	0	0	0	0	1	0	0	1	0	0	0	0	0	1	0	0	0	0	0	0	0	0	0	1	0	0	0	1	0	0	0	4	4	1	2	0	0	0	0	0	0
Ec-00_007770	1	0	1	0	0	3	1	1	1	2	0	2	0	0	0	0	0	0	0	0	0	1	0	0	0	0	0	4	3	2	3	2	1	0	0	0	0	0	0	0	0
Ec-00_007780	17273	13729	23443	22652	19324	13783	31716	21492	16026	26892	37634	277238	412302	150809	188990	17668	29951	29330	27322	14768	23609	17093	12066	15233	18516	36988	26732	16622	15214	6455	12381	30655	140236	13012	128815	1770	156	53504	51386	13767	14616
Ec-00_007790	1415	1164	2987	3257	2503	1637	3631	2496	3338	4899	5349	19306	18628	8253	13439	2866	1626	2439	2070	632	1819	3399	2682	5867	9449	1736	358	7488	7329	91	114	1797	5282	992	5424	533	33	1892	1996	468	913
Ec-00_007800	116	90	34	49	76	156	137	123	124	173	115	581	642	278	550	106	51	90	127	286	297	56	52	482	481	299	335	430	381	486	510	772	974	639	866	204	88	197	344	210	267
Ec-00_007810	27	21	34	17	26	10	8	12	4	4	8	201	198	31	60	0	1	0	1	12	11	4	0	145	106	5	2	54	113	75	72	103	266	222	159	3	20	63	19	93	72
Ec-00_007820	284	217	548	639	392	408	906	638	604	566	1111	6115	6065	3150	7899	789	2148	1007	1009	3084	3032	1077	744	2199	2017	3963	7733	2196	2276	11135	11761	11782	11138	7482	7737	782	2102	2878	3989	2787	2891
Ec-00_007830	1	0	11	7	13	16	14	11	123	139	133	221	304	157	380	240	56	243	298	180	207	59	34	174	135	111	57	150	177	139	132	219	241	131	292	99	33	94	192	84	179
Ec-00_007840	1	1	2	2	3	1	5	2	1	0	1	22	21	29	91	6	2	1	2	2	7	3	6	11	21	4	3	9	22	0	2	2	3	0	1	1	0	0	1	0	3
Ec-00_007845	48	55	529	627	419	543	384	290	72	56	67	224	204	134	358	8	6	5	10	14	16	69	42	594	647	114	115	404	339	96	115	230	235	115	253	47	9	47	113	51	27
Ec-00_007847	0	0	314	444	243	294	218	144	0	1	0	0	0	0	0	2	3	0	1	3	8	0	0	0	0	0	0	0	0	0	0	1	0	0	0	13	0	19	25	16	9
Ec-00_007848	0	0	61	75	33	163	94	69	2	0	1	6	1	2	7	63	32	22	42	45	90	0	0	2	4	0	0	5	5	0	1	2	0	5	1	124	62	126	141	50	110
Ec-00_007850	2	0	0	1	0	2	1	2	12	8	8	85	64	213	288	54	18	48	34	38	46	32	19	59	55	157	171	44	43	347	277	152	91	87	111	31	22	22	70	32	77
Ec-00_007860	0	0	0	0	0	0	0	0	0	0	0	0	0	0	0	0	0	0	0	0	0	0	0	0	0	0	0	0	0	0	0	0	0	0	0	0	0	0	0	0	0
Ec-00_007865	105	110	205	260	104	355	233	148	211	280	312	110	83	36	187	100	96	168	191	179	181	118	106	662	630	16	11	733	812	105	71	222	148	178	181	359	121	54	101	61	40
Ec-00_007870	0	0	1	0	0	0	1	1	0	0	0	1	1	0	0	0	0	0	0	0	2	0	0	1	0	0	0	0	0	0	0	0	0	0	0	2	0	5	3	3	3
Ec-00_007880	0	1	0	0	0	1	1	0	0	1	0	14	12	12	9	3	0	0	0	0	0	3	1	14	8	0	2	8	15	1	5	3	6	8	11	8	0	0	3	0	1
Ec-00_007890	0	0	0	0	0	0	0	0	0	0	0	0	0	0	0	0	0	0	0	0	0	0	0	0	0	0	0	0	0	0	0	1	1	1	0	0	0	0	0	0	0
Ec-00_007900	37	31	1172	1121	748	746	1135	1197	533	861	508	2182	1532	589	1960	1044	1080	671	686	799	740	368	275	719	807	1343	1592	875	646	1973	2284	1083	1190	1574	1537	435	530	426	586	675	664
Ec-00_007910	0	0	0	0	0	0	0	0	0	2	0	3	0	5	3	0	0	0	1	0	1	0	0	2	0	0	0	0	0	0	0	0	2	0	2	0	3	0	0	1	1
Ec-00_007920	1	1	10	10	10	23	30	15	27	19	23	121	95	90	260	41	51	24	40	53	73	16	16	135	163	122	90	119	186	139	146	133	145	87	93	59	25	19	56	19	52
Ec-00_007930	0	0	1	1	0	2	0	0	0	0	0	0	0	0	0	0	0	0	0	0	0	0	0	0	0	0	0	0	0	0	0	0	0	0	0	0	0	0	0	0	0
Ec-00_007940	0	0	0	1	0	0	0	0	0	0	0	1	3	2	0	0	0	0	0	1	0	0	0	1	0	0	0	0	0	0	0	5	3	0	2	0	0	1	0	0	1
Ec-00_007950	0	0	0	0	0	0	0	0	0	0	0	0	0	0	0	0	0	0	0	0	0	0	0	0	0	0	0	0	0	0	0	0	0	0	0	0	0	0	0	0	0
Ec-00_007960	0	0	0	0	0	0	0	0	0	1	0	0	0	0	0	0	0	0	0	0	0	0	0	0	0	0	0	0	0	0	0	0	0	0	0	0	0	0	0	0	0
Ec-00_007970	0	0	0	0	0	0	0	0	0	0	0	1	0	0	0	0	0	0	0	1	0	0	0	1	0	0	0	0	0	0	0	0	0	0	0	0	0	0	0	0	0
Ec-00_007980	3	2	24	30	17	15	41	27	21	43	41	128	137	53	125	17	13	22	19	44	30	25	23	37	23	48	79	15	41	63	86	157	157	94	129	7	30	6	19	19	45
Ec-00_007990	30	25	304	476	248	448	659	408	226	290	238	975	1057	485	1137	249	216	280	300	311	367	582	537	460	553	279	487	446	398	373	453	846	712	739	731	163	207	113	163	134	121
Ec-00_008000	0	0	0	0	0	0	1	1	0	0	0	0	0	0	0	0	0	0	0	0	0	0	0	0	2	0	0	2	3	0	0	0	0	0	0	0	0	0	0	0	0
Ec-00_008010	6	7	30	133	26	456	265	42	52	61	16	76	56	13	56	67	57	12	8	11	8	13	16	25	38	123	150	194	84	48	69	186	149	72	99	23	14	9	19	10	9
Ec-00_008020	0	0	2	0	0	1	2	0	0	0	0	3	13	16	39	0	0	0	1	2	5	0	0	2	3	7	0	0	4	0	1	3	21	6	4	0	2	3	6	0	0
Ec-00_008030	0	1	4	0	0	1	1	2	0	0	0	0	0	0	7	0	0	1	1	0	2	0	0	0	2	0	0	0	1	0	0	1	0	0	0	0	0	1	0	0	0
Ec-00_008040	107	81	247	342	256	275	332	256	164	236	276	323	531	364	398	171	117	141	152	114	153	150	115	692	837	277	194	889	919	275	295	345	339	217	424	167	87	108	134	87	126
Ec-00_008050	22	20	498	638	354	420	866	746	443	485	559	2190	1783	1000	2695	890	733	749	751	782	903	687	483	2240	2227	2197	2656	2008	2379	2316	2718	1801	1822	1324	1432	591	782	533	796	527	678
Ec-00_008060	598	482	1232	1118	701	960	2195	1340	7240	5224	4983	62260	79478	53354	63454	3419	6192	6867	13051	16353	17563	9003	7165	22720	24699	12212	15544	25228	26556	65400	62172	87179	88754	48018	109806	3637	5462	23445	42721	19875	37745
Ec-00_008070	2231	1973	63	230	188	67	56	52	86	202	312	345	601	4596	12586	1911	3346	9790	6784	1074	1011	110	81	43	45	114	19	9	10	6	19	17	14	39	25	8	0	0	0	3	5
Ec-00_008080	6	2	57	56	53	56	43	41	24	51	25	75	69	26	107	33	19	22	25	32	28	35	19	46	66	32	34	46	60	36	16	49	63	88	115	38	17	10	28	21	14
Ec-00_008090	0	0	68	139	73	145	179	152	4	9	1	0	1	0	1	75	42	49	54	60	75	0	0	2	0	1	0	0	2	3	2	1	0	1	2	84	30	21	64	42	29
Ec-00_008100	2	2	237	423	331	526	494	461	23	58	29	9	7	7	12	326	170	265	235	365	300	5	4	21	21	16	11	21	20	10	8	13	9	12	20	219	175	116	228	182	114
Ec-00_008110	101	87	756	985	701	730	928	754	640	1015	1278	1925	2261	981	1975	544	600	740	740	925	901	564	513	1365	1222	1263	2031	874	889	2451	2682	2047	2036	1584	2940	291	379	298	525	468	663
Ec-00_008130	1	2	26	30	29	31	29	28	117	215	76	100	61	66	94	51	0	38	33	14	28	4	5	103	43	0	0	51	49	1	1	93	60	33	48	18	4	1	1	1	0
Ec-00_008140	0	0	0	0	1	1	0	0	0	0	0	66	17	38	78	4	4	1	1	7	15	2	0	0	0	8	2	0	0	0	2	0	4	0	0	0	0	1	1	0	0
Ec-00_008145	0	0	5	6	1	6	6	4	0	5	0	1	7	2	8	0	0	0	0	0	0	3	0	17	17	6	8	20	6	2	2	8	4	4	4	0	0	10	1	14	0
Ec-00_008150	0	0	6	7	1	6	10	9	8	9	2	24	11	7	38	4	0	3	2	5	7	13	5	16	18	30	12	17	23	8	11	6	11	6	5	4	5	2	6	3	5
Ec-00_008157	0	1	39	66	19	28	32	18	1	0	0	10	33	4	33	4	7	2	2	1	3	11	7	42	18	5	1	14	23	25	0	20	21	3	50	3	3	1	1	0	2
Ec-00_008160	0	0	0	0	0	0	0	0	0	0	0	0	2	0	0	0	0	0	0	0	0	0	0	0	0	0	0	0	1	0	0	0	0	0	0	0	0	0	0	0	0
Ec-00_008170	7	6	2	1	4	0	0	0	0	0	0	12	10	0	86	1	0	0	1	33	48	0	0	4079	6322	311	85	9966	6486	1400	1014	2360	4125	7948	1281	640	19	1274	974	800	382
Ec-00_008175	7	2	0	1	0	0	0	0	0	0	0	3	0	0	46	0	1	0	1	39	36	0	0	533	489	180	122	823	667	2237	1791	1721	3700	4259	701	160	5	1100	856	858	637
Ec-00_008177	1	4	1	0	1	1	0	0	0	0	0	4	5	0	34	0	0	0	0	28	32	0	0	313	321	87	63	548	365	974	784	1082	2546	3265	415	102	4	598	413	395	138
Ec-00_008180	0	0	0	0	0	0	0	0	0	0	0	0	0	0	0	0	0	0	0	0	0	0	0	0	0	0	0	2	0	0	1	0	0	1	0	0	0	0	1	1	0
Ec-00_008190	237	173	141	192	185	197	237	187	436	492	549	965	1227	607	1233	298	301	249	351	265	287	300	247	544	510	636	821	583	592	1104	1123	1074	912	834	941	220	626	292	320	237	301
Ec-00_008200	54	42	1085	1386	993	866	1852	1893	1017	1039	1409	4457	4536	2061	6255	1551	1336	1512	1535	2190	2289	1096	779	1982	2175	4813	7044	2032	1958	5744	6588	5184	4495	3189	4090	896	1273	1033	2043	1488	2095
Ec-00_008210	2	0	7	9	7	2	5	0	0	0	1	45	37	10	40	0	0	0	1	28	22	2	2	28	20	9	9	10	19	15	23	21	35	8	38	5	2	3	19	21	29
Ec-00_008215	1713	1156	1141	804	1280	1031	1438	617	72	56	59	89	244	19	58	31	15	17	53	45	52	2	0	48	18	13	3	15	36	1	7	11	15	25	7	4	1	5	1	5	2
Ec-00_008220	1	2	32	22	14	41	17	3	0	0	0	0	0	0	0	0	0	0	0	0	0	0	0	0	0	0	0	0	0	0	0	0	0	0	0	0	0	0	0	0	0
Ec-00_008230	38	44	280	236	163	114	372	306	165	187	127	602	712	259	618	153	142	114	100	128	169	158	115	225	170	403	568	152	228	384	428	512	466	368	438	36	193	134	148	176	217
Ec-00_008240	133	105	86	71	178	138	271	59	4	6	16	3	15	3	3	2	0	1	1	1	2	0	0	5	0	0	0	0	4	0	0	0	1	0	2	0	0	0	0	0	0
Ec-00_008250	62	67	249	344	195	341	389	307	141	147	122	416	445	233	469	258	172	169	144	120	149	163	124	251	314	434	431	217	243	247	281	278	265	289	322	89	239	46	67	62	107
Ec-00_008255	0	0	1	0	0	1	2	0	0	0	1	3	1	0	2	0	1	2	0	3	3	0	1	20	26	12	25	46	37	63	100	40	35	10	15	16	2	5	6	4	2
Ec-00_008260	1	0	0	1	0	0	0	0	0	0	0	5	1	0	25	0	0	0	0	7	5	0	0	1	4	18	53	7	14	73	10	716	285	58	185	1	9	6	10	5	5
Ec-00_008270	0	0	1	0	0	0	0	0	0	0	0	0	0	0	0	0	0	1	0	1	0	1	0	1	2	0	0	5	0	3	0	1	2	1	0	0	0	0	0	1	0
Ec-00_008280	0	0	77	92	21	45	108	72	4	4	0	341	229	179	1164	19	11	4	4	107	104	10	4	89	85	829	1450	57	42	467	815	252	149	141	80	52	129	11	32	65	14
Ec-00_008290	265	204	532	650	705	486	515	445	363	591	375	574	513	137	477	470	410	375	371	663	521	88	40	211	106	957	1328	133	192	1029	1296	692	747	432	489	234	912	163	260	417	728
Ec-00_008300	0	0	0	0	0	1	0	0	0	0	0	2	1	0	4	33	41	1	0	2	1	5	2	6	8	28	15	3	3	0	20	0	2	0	0	0	0	0	0	1	2
Ec-00_008310	0	0	84	104	82	90	121	104	0	1	2	2	2	0	0	187	37	194	242	137	141	0	0	2	1	0	0	0	0	0	0	0	0	0	0	99	70	24	74	26	32
Ec-00_008320	6	8	36	88	87	85	133	100	261	380	148	124	229	140	213	60	21	126	123	78	99	35	24	99	104	81	74	59	107	28	39	131	109	74	88	51	29	9	44	17	23
Ec-00_008330	0	0	22	13	7	32	24	21	83	173	57	2	1	1	0	0	2	1	0	1	0	1	0	0	2	0	0	0	0	0	0	12	1	1	0	0	0	0	0	0	0
Ec-00_008340	10	13	1	4	4	3	2	3	0	0	1	279	275	92	383	10	1	1	2	115	73	5	5	65	94	116	108	64	65	350	369	148	259	439	569	11	13	76	75	161	156
Ec-00_008350	111	98	187	239	226	168	337	227	245	257	247	1298	1190	617	1679	226	268	247	337	710	752	199	143	448	508	791	1330	402	471	1976	2386	1995	2077	1254	1847	183	419	486	751	716	831
Ec-00_008360	0	0	0	1	0	0	0	0	0	0	0	0	0	0	1	0	0	0	0	0	0	0	0	0	0	0	0	0	0	0	0	0	0	0	0	1	0	0	0	0	0
Ec-00_008370	5	5	25	26	55	27	34	64	4	7	12	23	209	20	55	3	0	26	98	5	14	2	2	5	5	0	0	2	2	1	0	11	4	2	3	2	1	0	0	0	1
Ec-00_008380	11	12	51	50	130	46	91	157	20	16	17	93	372	29	123	27	24	83	154	19	42	142	120	14	10	3	2	6	4	1	4	18	3	12	17	3	1	0	6	0	5
Ec-00_008400	3	9	0	1	2	0	0	1	1	0	0	287	221	82	111	2	2	1	0	71	56	0	1	142	122	21	12	101	121	10	21	105	197	107	91	27	2	22	50	40	43
Ec-00_008410	0	1	1	0	0	0	0	0	0	0	0	75	72	15	14	0	0	0	0	12	10	1	0	18	16	9	1	6	12	6	8	45	71	28	41	12	0	9	4	9	15
Ec-00_008420	12	10	1136	1172	862	1038	979	903	154	161	115	170	131	113	214	909	639	894	863	645	727	88	68	298	304	75	106	305	239	55	73	148	127	104	190	1224	726	383	630	468	595
Ec-00_008430	84	73	1489	1268	1058	843	976	1206	1261	2070	1964	2138	1865	815	1988	1746	1716	1678	1750	1784	1464	502	361	1445	1180	1621	1764	1162	1742	2229	2322	2636	2854	1287	1778	751	1777	829	1351	1062	2325
Ec-00_008440	801	604	1468	1663	1600	718	1054	1088	670	1131	1109	3316	4404	2786	4832	1479	2094	1802	1985	1781	1639	945	720	1133	865	2318	3534	846	1306	4629	5056	4066	4539	3066	4092	399	1783	1009	1312	1152	1799
Ec-00_008450	8	3	8	24	26	24	28	13	57	80	133	654	401	275	685	263	299	184	273	203	324	226	171	115	149	140	109	232	160	533	323	1320	733	198	737	534	126	13	12	23	32
Ec-00_008460	720	571	351	470	471	364	330	240	81	143	137	1030	989	431	1049	202	334	202	251	1073	891	60	47	187	159	814	2040	94	135	1854	2162	2364	1831	1101	1108	189	694	277	344	432	494
Ec-00_008480	394	280	215	220	272	328	353	295	321	420	676	1824	2398	890	2036	423	808	442	573	692	716	286	245	532	420	781	1564	412	510	2397	2602	2235	2326	1498	1608	359	983	734	874	773	740
Ec-00_008490	27	17	525	224	140	121	186	191	137	152	142	372	381	125	224	124	215	74	71	32	102	186	144	661	494	72	59	472	685	134	105	148	274	101	544	52	31	62	110	54	66
Ec-00_008500	63	49	306	413	257	490	458	253	746	948	690	1046	1172	622	821	285	119	233	262	257	270	347	284	1446	1454	529	490	1314	1590	322	309	874	1101	454	1218	340	138	163	358	118	311
Ec-00_008510	22	20	130	126	96	180	241	123	328	430	400	169	138	84	215	146	104	127	115	146	142	66	38	366	285	261	226	298	474	152	159	136	161	110	197	182	179	78	144	76	109
Ec-00_008520	0	0	0	0	0	0	0	0	0	0	0	3	1	0	0	0	0	0	0	0	0	0	0	0	2	0	2	0	0	0	0	0	0	0	0	0	0	0	0	0	0
Ec-00_008530	56	48	241	446	319	303	342	314	154	319	179	434	489	189	448	184	131	158	197	208	191	113	75	235	201	378	363	181	219	421	420	491	450	345	380	160	150	100	185	144	208
Ec-00_008550	0	0	17	19	21	64	14	16	1	6	4	37	29	9	27	5	4	5	9	11	8	3	1	11	4	11	33	4	7	29	34	50	52	22	23	2	3	5	9	7	19
Ec-00_008560	4	1	376	502	304	503	443	296	67	251	178	250	278	125	343	220	257	247	230	325	237	18	16	102	74	271	505	63	123	464	499	440	424	204	265	89	224	154	213	296	572
Ec-00_008570	1	3	83	50	33	106	67	72	3	5	8	11	14	2	113	22	38	60	47	22	40	9	6	78	146	52	32	92	123	31	22	9	2	39	2	0	5	0	6	3	13
Ec-00_008580	0	0	0	0	0	0	0	1	0	0	0	1	0	0	0	0	0	0	0	0	0	0	0	0	1	0	0	1	1	1	0	10	7	1	1	0	0	0	0	0	0
Ec-00_008585	4	11	3	7	2	6	2	5	0	0	2	24	12	9	114	2	6	5	2	5	4	6	3	239	208	20	7	635	675	187	115	1033	603	576	429	19	0	35	33	15	15
Ec-00_008590	0	1	1	0	0	0	0	0	0	0	0	0	0	0	6	0	0	0	0	0	0	0	0	1	5	0	1	10	10	4	1	29	21	22	15	0	0	2	0	2	0
Ec-00_008600	0	0	0	0	0	0	0	0	0	0	0	0	0	0	0	0	0	0	0	0	0	0	0	0	0	0	0	1	0	0	0	3	2	2	0	0	0	0	0	0	0
Ec-00_008610	0	0	0	0	0	0	0	0	0	0	0	2	6	1	4	1	0	0	0	0	0	0	0	2	2	3	0	0	1	1	0	0	1	0	0	0	0	0	0	0	0
Ec-00_008620	0	0	6	0	1	0	2	0	13	17	6	17	8	10	11	2	4	1	0	0	0	3	0	7	10	6	1	3	7	3	0	0	3	1	0	0	1	0	0	1	1
Ec-00_008640	0	0	1	2	0	0	0	0	1	1	1	0	0	0	1	0	0	0	1	0	0	0	1	2	0	0	0	0	0	0	0	0	0	0	0	0	0	0	0	0	0
Ec-00_008630	0	0	0	1	3	0	0	1	6	3	4	12	33	20	34	2	3	2	0	0	1	0	0	4	4	0	0	9	5	0	0	1	3	0	1	0	0	0	0	0	0
Ec-00_008650	19	16	136	139	81	195	249	123	530	400	285	1708	1577	1412	1712	243	170	232	281	271	327	266	260	2382	2341	367	438	2261	2481	1259	1102	2249	2183	1426	4253	646	281	517	1108	467	686
Ec-00_008660	9112	7485	664	1254	1475	560	663	708	232	355	172	1394	1829	479	881	149	125	85	109	273	259	51	45	998	978	1760	2197	603	787	1909	2364	1228	1386	925	1111	300	363	178	304	262	252
Ec-00_008670	7503	6067	2488	4362	2807	1506	4543	3279	743	868	1832	544	688	36	160	643	161	9	24	870	631	113	56	1625	1366	1510	4837	1124	1113	12973	15627	3455	1905	1920	6974	277	378	1106	3324	1305	936
Ec-00_008680	7042	6200	1912	3915	1844	2166	3007	2105	764	733	1281	326	449	56	124	480	77	6	5	330	304	75	60	2515	2919	1336	2372	2181	2015	6114	6981	1983	1018	1378	5210	525	277	491	1550	521	227
Ec-00_008690	17	12	539	815	498	344	834	887	142	147	206	885	734	320	1169	322	346	157	204	288	296	306	201	597	462	1361	2368	424	694	1348	1589	692	606	658	465	157	366	195	275	294	369
Ec-00_008700	15	12	160	202	116	183	221	153	222	349	212	398	404	229	647	308	144	266	256	228	243	180	123	542	552	595	661	452	591	634	691	485	628	291	781	199	125	103	208	118	225
Ec-00_008720	3	4	5	4	2	4	6	4	6	17	9	300	324	88	177	10	3	3	16	158	140	6	5	173	154	84	58	148	202	177	136	190	331	220	349	50	16	87	155	169	238
Ec-00_008730	366	297	234	241	274	82	85	139	214	282	236	2145	2353	786	1686	244	432	171	175	411	363	267	192	1087	1388	451	503	1194	1331	694	738	4341	5480	813	1757	131	779	218	294	310	586
Ec-00_008740	18	7	8	8	6	10	12	7	21	28	32	2131	2259	986	2786	53	37	27	29	388	285	48	42	512	597	477	397	420	673	1938	1836	1551	2771	3871	3827	52	134	612	661	1924	1312
Ec-00_008750	219	155	362	294	207	304	509	268	1145	1156	284	1493	1610	530	937	536	276	452	562	454	495	390	318	880	971	795	1008	1075	819	387	363	1713	1395	736	787	385	405	84	133	121	77
Ec-00_008760	0	0	1	0	0	1	2	0	0	0	0	1	1	0	4	0	0	0	0	0	0	0	0	0	3	0	0	0	0	0	0	0	0	0	0	0	0	0	0	0	0
Ec-00_008770	56	52	3	6	14	6	3	3	8	16	11	50	42	34	65	14	4	11	7	25	27	4	9	74	58	53	43	54	92	30	31	90	98	65	74	18	26	14	22	10	17
Ec-00_008780	17	16	2	5	3	3	0	2	4	7	4	10	14	2	18	3	1	3	2	8	7	1	3	12	10	21	12	14	13	12	14	27	23	14	20	6	20	1	4	6	6
Ec-00_008790	43	45	6	14	10	14	2	9	13	9	6	63	72	22	89	30	14	18	20	31	33	7	7	57	74	62	48	53	81	49	35	121	94	60	107	36	37	12	18	27	6
Ec-00_008800	2	1	5	3	3	8	16	0	25	27	5	1	3	0	1	0	0	0	0	1	0	13	6	64	99	0	1	6	3	0	0	0	0	1	0	0	0	0	0	1	0
Ec-00_008810	0	0	0	1	0	1	1	0	0	0	0	4	79	2	2	0	0	0	0	0	0	0	0	12	0	0	0	12	13	0	0	6	7	0	0	0	0	0	1	1	0
Ec-00_008820	5	0	134	159	98	88	359	156	2	12	10	2909	2126	954	2127	5	7	86	41	110	180	2	3	18	10	3	1	17	21	5	4	1274	3308	818	67	10	1	20	12	12	7
Ec-00_008830	119	94	1609	1439	963	1626	4650	2663	2468	2603	2619	7852	9819	3967	9793	2745	2400	3911	3900	5257	5320	2505	1588	5377	4705	5764	10940	3639	3579	5319	5837	9627	8889	6167	6124	1180	4921	2707	4120	2583	2547
Ec-00_008835	1	5	18	18	20	60	73	36	13	23	25	293	262	172	343	53	25	90	63	82	116	43	39	130	171	88	97	125	81	78	72	299	284	222	265	65	58	41	49	19	15
Ec-00_008840	91	66	2201	2270	1874	1189	3992	3265	563	773	1545	3971	5485	1696	1958	198	251	289	235	268	329	46	15	328	300	82	63	282	337	92	99	1202	9135	121	7121	25	3	1428	1492	413	405
Ec-00_008850	148	143	1257	1715	1291	1439	1787	1818	281	379	811	1138	743	372	469	6	3	13	6	4	5	45	46	224	300	6	0	447	291	0	0	40	135	61	6	0	0	0	0	0	1
Ec-00_008860	12	23	359	386	231	262	390	165	382	384	375	720	553	647	917	435	248	285	235	224	260	181	170	836	1115	669	462	1035	1106	501	465	504	382	506	492	725	368	216	284	178	255
Ec-00_008870	155	119	1245	1029	531	865	1006	817	374	462	382	7119	6158	4977	11889	780	709	646	754	2412	3580	1330	1050	8458	9794	11521	15272	6828	7302	9683	10799	8173	7379	6687	9146	1856	2187	1690	2870	2285	2155
Ec-00_008880	0	0	8	5	4	3	3	6	0	0	0	0	0	0	2	4	0	2	2	5	6	0	0	2	4	0	1	5	1	2	0	2	0	1	1	10	7	10	12	10	3
Ec-00_008890	41	23	63	83	83	108	171	156	42	90	142	346	396	288	690	89	94	123	162	251	252	224	185	457	391	310	589	253	286	769	746	830	872	669	1065	100	228	176	238	163	206
Ec-00_008910	430	298	756	738	530	403	544	434	454	689	498	1035	867	566	1132	783	480	704	782	721	627	350	218	565	464	825	786	474	545	868	1040	1133	1191	869	1382	437	262	397	565	602	748
Ec-00_008920	299	244	11	33	48	69	101	25	115	129	62	4998	4169	2840	11784	324	238	202	308	3785	3406	405	327	9690	8420	6379	6864	6551	7477	10247	9787	20100	12020	8745	12957	6211	3926	1645	4325	2254	3893
Ec-00_008930	0	0	0	1	1	1	1	2	1	1	0	6	6	2	4	0	0	0	0	0	2	0	0	3	7	0	3	7	6	0	1	12	18	3	3	0	0	3	2	1	0
Ec-00_008940	0	0	2	1	0	13	13	5	13	8	10	141	154	39	97	24	20	25	29	4	2	50	52	1	0	2	1	1	0	0	0	0	0	1	0	0	0	0	0	0	0
Ec-00_008950	8	3	29	52	28	52	88	79	69	104	105	469	589	239	590	131	183	138	145	212	248	90	87	93	100	316	566	86	104	721	792	421	492	493	590	78	130	164	258	235	337
Ec-00_008970	7	1	5	7	4	31	56	27	12	24	20	121	156	25	74	15	7	14	19	34	25	12	7	62	107	38	22	34	42	68	74	88	137	73	77	17	3	21	33	28	38
Ec-00_008980	0	0	0	0	0	0	0	0	0	0	0	5	1	0	2	0	0	0	0	0	0	0	0	2	1	0	0	13	2	1	0	17	22	11	5	0	0	1	1	0	0
Ec-00_008990	1	0	1	2	1	6	13	0	1	0	0	0	0	1	3	2	0	0	0	3	1	0	0	0	0	0	0	0	0	0	1	0	1	0	0	0	0	1	1	0	0
Ec-00_009000	0	0	4	8	0	27	37	2	14	6	13	33	53	14	68	7	3	8	14	32	31	4	6	46	31	41	37	40	66	42	37	92	87	25	53	33	23	16	23	9	24
Ec-00_009010	0	0	0	0	0	0	0	0	0	0	0	1	1	0	3	0	0	0	0	1	0	0	0	4	3	2	0	24	32	3	1	64	32	59	21	0	0	2	0	0	0
Ec-00_009020	773	622	41	338	107	114	276	60	111	148	50	3008	2447	2496	9405	175	259	562	782	18305	13735	203	179	17641	16369	17831	34468	12088	11247	28475	30561	70937	49743	35276	36107	4747	18833	6087	10943	7320	7984
Ec-00_009030	0	0	1	1	0	10	8	2	51	92	42	67	63	41	82	142	59	124	129	38	46	42	20	40	32	81	74	31	25	22	22	22	13	27	9	32	27	12	20	6	19
Ec-00_009035	0	0	0	0	0	2	3	0	4	13	4	28	24	18	32	11	11	14	24	3	7	8	1	5	7	13	18	2	12	2	4	7	8	10	4	7	2	2	2	2	0
Ec-00_009040	0	0	0	3	2	5	4	0	5	5	5	0	1	3	1	0	1	0	0	0	0	1	5	16	10	1	0	5	12	0	0	0	1	2	2	0	0	0	0	1	0
Ec-00_009060	0	0	0	0	0	0	0	0	0	0	0	0	0	0	0	0	0	0	0	0	0	0	1	0	0	0	0	0	0	0	0	0	0	0	0	0	0	0	0	0	0
Ec-00_009050	0	0	2	3	2	0	0	1	73	37	51	156	252	165	288	565	204	362	522	27	38	58	43	27	19	6	2	15	51	3	8	4	20	2	7	10	0	3	13	4	1
Ec-00_009070	0	0	1	1	0	0	2	0	0	0	0	1	9	8	9	0	0	0	0	0	4	0	0	0	1	0	5	0	0	0	0	13	13	9	2	3	5	1	1	1	1
Ec-00_009080	0	0	0	0	0	0	0	0	0	0	0	0	0	0	0	0	0	0	0	0	0	0	0	0	0	0	0	0	0	0	0	0	0	0	0	0	0	0	0	0	0
Ec-00_009100	81	76	586	722	488	680	897	599	874	931	824	2783	2174	974	2847	1321	928	921	912	1328	1385	1086	786	3132	2906	2382	2574	3008	3425	4168	4219	2951	3288	2238	3760	1067	1244	1071	1384	1074	1463
Ec-00_009110	17	8	205	200	139	163	314	177	324	275	301	812	602	315	720	385	303	172	205	392	421	265	162	957	879	574	706	894	1064	1038	985	934	1175	691	1300	272	636	546	586	552	861
Ec-00_009120	3312	2795	769	1324	829	685	857	630	625	673	620	1397	1559	770	1336	465	420	412	557	569	668	306	216	572	496	535	626	497	602	1124	1151	1079	1204	1000	1669	189	263	550	941	661	929
Ec-00_009130	279	193	16	22	23	19	20	18	5	12	6	38	43	26	60	14	20	14	19	53	46	26	14	24	10	117	163	9	20	318	397	30	36	45	61	4	10	58	78	50	57
Ec-00_009140	26	8	429	525	262	366	358	336	290	329	271	372	370	196	400	225	137	164	142	140	151	187	179	607	709	419	358	636	542	250	340	394	277	322	416	295	143	121	193	183	223
Ec-00_009150	0	0	0	0	0	0	0	0	0	0	0	0	0	2	0	0	0	1	0	0	0	0	0	0	0	0	0	0	0	0	0	0	0	0	0	0	0	0	0	0	0
Ec-00_009160	0	0	0	0	0	0	0	0	0	0	0	0	1	0	1	0	0	0	0	0	0	0	0	0	0	0	0	0	0	0	0	0	0	0	0	0	0	0	0	0	0
Ec-00_009170	0	0	0	0	0	0	0	0	1	0	0	1	1	8	30	0	0	0	0	0	0	0	0	2	4	1	2	0	1	0	0	0	0	0	0	0	0	0	0	0	0
Ec-00_009180	0	0	0	0	0	0	0	0	0	0	0	0	0	0	0	0	0	0	0	0	0	0	0	0	0	0	0	0	0	0	0	2	1	3	1	0	0	0	0	0	0
Ec-00_009190	0	0	0	0	0	0	0	0	0	0	0	0	0	0	0	0	0	0	0	0	0	0	0	0	0	0	0	1	0	0	0	0	1	0	2	0	0	0	0	0	0
Ec-00_009200	155	159	346	294	202	272	578	299	168	229	341	931	831	275	831	186	342	248	209	905	646	223	148	295	157	748	2068	111	143	1896	2385	1451	1236	1092	763	77	336	502	406	476	277
Ec-00_009210	0	0	0	0	0	0	1	0	3	1	1	1	0	0	1	2	0	0	0	1	1	0	0	0	0	5	2	0	2	5	2	4	0	0	1	4	0	0	2	1	0
Ec-00_009220	224	149	969	1353	853	940	765	555	174	384	361	640	898	380	839	544	469	498	477	624	505	84	76	342	212	1390	1638	218	345	1678	1872	1086	1053	662	730	247	444	243	303	289	467
Ec-00_009230	40	40	493	602	370	291	476	406	166	275	412	252	225	80	236	193	172	140	157	176	171	114	81	497	202	301	362	215	289	388	356	237	252	113	280	125	170	97	127	134	69
Ec-00_009240	5	3	22	41	42	28	30	28	2	6	2	457	500	92	366	28	14	6	14	239	206	9	9	391	222	162	122	181	295	159	183	296	547	173	397	60	20	89	172	254	601
Ec-00_009250	80	62	1	9	4	2	6	6	6	5	8	463	325	120	662	9	12	14	12	252	202	3	5	192	178	157	94	103	129	196	156	2023	1328	283	396	384	146	23	90	48	74
Ec-00_009260	0	0	0	0	0	0	0	0	0	0	0	0	0	0	0	0	0	0	0	0	0	0	0	0	0	0	0	0	0	0	0	0	0	0	0	0	0	0	0	0	0
Ec-00_009270	0	0	4	9	4	10	19	4	0	0	0	0	0	4	0	13	13	17	11	3	5	0	0	0	0	0	0	0	0	0	0	0	0	0	0	4	1	0	1	1	3
Ec-00_009280	0	0	9	7	4	33	11	13	0	0	0	0	0	0	0	17	8	5	8	5	10	0	0	0	0	0	0	0	0	0	0	0	0	0	0	14	4	5	20	6	1
Ec-00_009300	10	10	197	145	111	257	256	217	35	16	43	244	398	272	449	86	96	75	67	50	89	197	145	602	738	724	522	475	796	322	373	286	197	164	354	117	144	83	109	131	197
Ec-00_009290	86	95	2147	1428	1346	1663	3453	2977	603	627	1103	4087	4495	1877	4719	1094	1366	1023	843	1218	1168	1618	1158	2731	2072	3266	5282	1562	3094	3461	4285	4025	3876	2229	3742	557	1279	877	1269	1172	1806
Ec-00_009310	2	2	5	3	6	9	7	14	2	1	1	13	39	14	44	3	3	7	4	33	50	21	19	145	109	51	102	86	86	32	33	158	106	68	61	54	63	7	15	7	3
Ec-00_009320	0	0	2	0	1	3	3	1	7	2	5	12	16	10	23	0	3	3	2	2	4	1	4	9	9	31	19	5	7	13	12	8	5	10	6	5	1	0	3	1	0
Ec-00_009340	13	11	206	248	150	150	319	325	70	93	143	1160	1220	487	1250	118	237	117	148	315	356	245	222	310	401	616	1314	284	324	1598	1766	1443	1170	1160	1336	74	329	274	375	367	326
Ec-00_009350	128	124	571	723	518	359	429	568	597	740	380	1126	938	517	1368	673	532	440	413	581	588	397	262	1039	907	1375	1373	1035	1177	1322	1511	1345	1220	1051	1247	437	787	424	650	439	748
Ec-00_009355	5921	4882	1822	2911	1566	1481	2118	2252	588	821	1213	4659	4477	1719	6414	1112	915	1071	1049	1406	1501	1194	913	1902	1528	3811	4469	1348	1318	2252	2833	3961	3449	3174	2851	963	1254	345	461	426	438
Ec-00_009360	19	9	4	13	32	10	7	14	21	62	17	62	18	18	35	99	100	5	9	28	31	54	41	341	330	139	160	334	354	274	242	102	125	78	96	42	79	133	224	114	259
Ec-00_009370	7104	6158	543	1032	1088	598	658	651	371	459	672	1144	1562	521	1537	687	283	468	467	520	542	559	476	971	1288	732	689	1247	1274	527	588	1546	1437	1505	1875	395	310	338	450	496	444
Ec-00_009380	0	0	0	0	0	0	0	0	0	0	0	0	0	0	0	0	0	0	0	0	0	1	0	0	2	0	0	0	0	0	0	0	0	0	0	0	0	0	1	1	0
Ec-00_009390	3	5	7	8	2	5	1	1	0	0	3	197	95	386	540	35	32	6	7	77	60	91	72	878	576	106	313	840	951	2762	2811	4015	1299	2744	3023	749	111	626	1482	1097	1265
Ec-00_009400	0	0	0	1	0	1	0	0	0	0	0	0	0	0	0	0	0	0	0	0	0	0	0	0	0	0	0	0	0	0	0	0	0	0	0	0	0	0	0	0	0
Ec-00_009410	1	1	3	3	0	0	2	0	57	73	14	15	6	9	39	1	2	54	49	482	367	0	0	8	12	4	28	1	0	12	14	25	4	111	10	26	107	2	0	2	1
Ec-00_009420	0	0	0	0	0	0	1	0	8	26	0	1	0	0	0	0	0	0	0	1	1	0	0	0	0	0	0	0	0	0	0	0	0	3	0	0	1	0	0	0	0
Ec-00_009425	3	2	5	1	2	8	5	2	0	2	0	85	36	39	121	19	21	5	4	76	65	17	12	91	128	195	273	118	99	143	142	98	58	145	89	46	142	52	57	33	17
Ec-00_009430	1	1	9	9	2	30	36	5	43	40	10	3	20	0	3	2	3	5	7	28	34	0	1	7	0	2	11	1	1	21	16	28	11	2	10	8	8	1	1	1	0
Ec-00_009435	84	76	521	540	256	517	394	284	238	214	169	2289	1923	1490	3290	322	347	406	462	583	658	527	405	1881	2453	1433	980	2275	2171	2516	2504	1562	1788	1859	3141	491	323	670	922	645	245
Ec-00_009437	0	0	13	24	9	84	91	34	112	208	53	141	192	60	74	101	41	30	30	3	4	72	101	15	12	0	0	37	20	0	0	4	1	2	1	0	0	0	0	0	0
Ec-00_009438	0	0	8	17	8	75	86	32	36	52	50	80	110	77	69	0	0	0	0	0	0	17	22	0	1	4	0	1	5	0	0	4	1	0	0	0	0	0	0	0	0
Ec-00_009440	0	1	6	23	10	98	93	29	63	83	103	76	131	140	327	180	104	35	31	6	17	122	94	5	4	5	2	1	4	0	1	8	18	18	19	0	0	0	0	0	0
Ec-00_009450	131	123	328	550	381	363	382	390	412	670	499	352	297	173	522	129	91	175	200	228	230	93	74	122	108	71	59	107	230	56	97	368	335	205	318	208	130	37	81	38	91
Ec-00_009460	40	34	518	235	211	120	150	230	89	117	69	170	259	81	113	16	29	8	8	12	38	41	33	177	111	14	14	90	239	33	22	58	178	43	275	4	5	13	11	7	11
Ec-00_009480	7	12	0	12	4	0	0	2	0	0	0	63	20	2	16	1	0	1	2	112	89	0	0	41	57	35	98	120	77	310	168	1392	367	180	883	880	229	18	66	31	61
Ec-00_009490	23	19	0	9	1	0	1	2	0	0	0	141	56	1	21	1	2	2	7	674	524	2	3	35	35	85	453	86	74	2459	1934	10414	3676	680	3731	518	332	70	294	217	180
Ec-00_009500	23	15	579	1396	595	434	1106	677	3073	6548	3020	9045	6297	4989	16339	9771	5228	5960	4340	6763	6380	2648	2074	2775	3539	8035	9361	3453	2651	6369	8221	9114	5295	10564	4110	3518	2460	2354	3354	3358	2416
Ec-00_009510	11	6	203	587	204	138	468	289	1471	2190	1381	2741	1830	1808	5083	2188	755	1071	854	1049	1436	1571	1410	3982	5645	2646	1696	4444	4221	1037	1220	2451	1288	3302	1625	1996	695	387	547	561	365
Ec-00_009520	0	0	1	0	0	0	1	1	0	1	2	1	0	0	2	0	0	63	1	1	0	0	0	1	4	20	10	2	0	3	2	7	3	6	5	0	0	0	1	2	1
Ec-00_009530	0	0	0	0	0	0	0	0	0	0	0	0	0	1	1	0	0	0	0	0	1	0	0	0	0	0	0	0	0	0	1	0	0	0	0	0	0	0	0	0	0
Ec-00_009540	4	3	74	102	83	173	187	93	121	191	102	90	92	58	163	16	8	23	37	23	29	11	6	94	38	18	22	44	48	13	14	111	76	53	89	37	22	6	12	9	20
Ec-00_009550	0	0	5	20	22	28	36	17	0	0	0	1	0	0	1	11	2	1	18	0	2	0	0	0	0	0	0	0	0	0	0	0	0	0	0	7	6	1	3	6	6
Ec-00_009560	0	0	0	0	3	1	2	2	0	0	0	3	1	0	1	0	0	0	0	0	0	0	0	1	0	0	0	1	0	0	0	4	2	0	1	0	1	0	0	0	0
Ec-00_009570	0	0	0	0	0	0	0	0	0	0	0	0	0	0	0	0	0	0	0	0	0	0	0	0	0	0	0	0	0	0	0	0	0	0	0	0	0	0	0	0	0
Ec-00_009580	0	0	0	0	0	0	0	0	0	0	0	0	0	0	0	0	0	0	0	0	0	0	0	0	0	0	0	0	0	0	0	0	0	0	0	0	0	0	0	0	0
Ec-00_009590	0	0	0	0	0	0	0	0	0	0	1	0	0	0	0	0	0	0	0	0	0	0	0	0	0	0	0	0	0	0	0	0	0	0	0	0	0	0	0	2	0
Ec-00_009600	174	112	133	275	97	71	101	62	172	312	377	233	200	123	215	306	120	57	40	16	14	328	208	55	53	9	10	56	28	6	16	124	175	167	94	9	23	1	0	5	3
Ec-00_009610	61	45	61	17	9	5	8	4	7	25	5	30	34	15	33	18	3	10	19	4	12	2	3	5	14	1	6	7	9	8	12	12	16	9	18	7	3	2	3	4	3
Ec-00_009620	91	78	2841	3043	2242	1494	2717	3608	1675	2711	2662	9848	8119	4042	12248	3666	5414	2742	2748	3451	3464	3456	2651	4390	4479	10562	11871	5031	4068	10384	11971	8988	6524	9533	9185	2578	5344	3093	4403	3406	5106
Ec-00_009630	1	0	3	7	6	3	5	2	1	0	2	0	1	3	0	0	3	1	0	0	2	3	2	4	2	12	5	5	1	6	7	1	1	6	9	1	6	0	2	0	1
Ec-00_009640	0	0	6	5	2	2	6	3	24	3	1	0	1	12	110	25	0	9	0	0	0	0	0	11	10	26	0	20	20	0	0	2	3	1	0	0	0	0	0	0	0
Ec-00_009650	0	2	1	1	0	2	0	1	0	2	0	26	46	48	44	1	0	1	0	4	9	0	0	0	5	0	0	1	0	0	9	0	1	0	2	0	0	0	0	0	1
Ec-00_009655	0	1	5	16	5	59	79	20	57	48	78	33	89	47	41	39	32	21	21	4	0	24	23	2	1	2	0	1	0	0	0	3	0	1	0	0	1	0	0	0	0
Ec-00_009660	0	0	7	10	1	82	128	19	3	0	2	11	15	21	53	71	50	57	37	8	5	3	1	6	3	0	2	2	0	0	0	74	88	50	30	46	3	1	0	0	0
Ec-00_009670	0	0	0	0	0	0	0	0	0	0	0	455	317	624	1645	0	0	0	1	10	33	0	0	1	8	86	52	5	1	0	3	19	53	9	1	0	0	0	0	0	0
Ec-00_009680	261	170	1210	1532	1092	838	1283	1038	1743	2066	1880	3515	3850	1720	4302	1858	2179	1433	1504	1861	1844	1205	869	2766	2240	3860	4853	2348	2708	4998	5347	4453	4464	2770	4196	1104	2731	1421	2109	1665	2356
Ec-00_009690	3	0	0	1	5	0	0	3	0	2	0	152	209	41	96	1	0	0	1	81	57	0	1	27	21	63	51	13	21	27	46	99	159	68	149	5	4	9	26	51	58
Ec-00_009700	0	0	2	1	2	0	0	1	0	0	0	0	0	0	0	0	0	0	0	0	0	0	0	0	0	0	0	0	1	0	0	0	0	0	0	0	0	0	0	0	0
Ec-00_009710	0	0	0	0	0	0	0	0	0	0	0	46	41	62	65	0	0	0	0	0	3	2	1	6	3	0	0	0	2	0	2	4	2	0	1	1	0	0	0	0	0
Ec-00_009720	0	0	1	0	1	2	0	0	0	0	0	0	2	4	14	0	0	4	2	1	0	1	0	1	4	0	0	0	0	0	0	1	0	0	0	1	0	0	0	0	0
Ec-00_009730	0	0	0	0	1	0	0	0	0	0	0	487	497	160	904	1	6	2	5	11	32	12	16	12	8	37	47	0	7	31	35	163	82	67	87	0	0	8	14	15	5
Ec-00_009740	3	2	10	13	3	3	2	1	2	4	3	1	0	0	0	0	0	0	0	0	0	0	0	2	5	0	0	4	3	0	0	0	1	2	2	0	0	0	0	0	0
Ec-00_009750	7	10	57	87	47	42	189	15	6	11	0	28	210	4	7	2	0	0	4	4	6	1	3	7	7	5	3	1	0	4	0	30	44	2	38	0	2	0	1	0	0
Ec-00_009760	0	0	0	0	0	0	0	0	0	0	0	0	0	0	0	0	0	0	0	0	0	0	0	0	3	0	0	0	0	0	0	1	0	0	0	0	0	0	0	0	0
Ec-00_009770	0	0	0	0	0	0	0	0	0	0	0	1	1	0	1	0	0	0	0	0	0	0	0	0	0	0	0	0	0	0	0	4	0	0	0	0	0	0	0	0	0
Ec-00_009775	91	83	299	345	158	197	228	122	204	394	178	464	616	452	716	140	42	246	298	115	158	150	123	797	849	644	340	600	736	277	312	477	188	284	157	56	8	81	136	94	86
Ec-00_009780	0	2	4	9	3	20	19	18	21	39	20	57	63	32	64	24	12	10	17	27	13	24	19	268	217	77	57	128	188	59	71	113	103	75	134	56	32	13	22	9	7
Ec-00_009790	0	0	0	0	0	2	0	0	0	0	0	0	0	0	0	0	0	0	0	0	0	0	0	0	0	0	0	0	0	0	0	0	0	0	0	0	0	0	0	0	0
Ec-00_009800	0	0	0	1	0	0	1	4	14	7	3	20	8	5	11	0	0	2	0	1	2	0	0	12	24	1	0	11	3	0	1	12	11	9	11	2	0	0	0	0	0
Ec-00_009810	7	4	18	42	26	49	77	47	151	211	166	302	198	154	468	202	89	164	155	327	257	121	81	1152	1033	682	976	797	967	1124	1024	2106	1367	782	1023	599	301	156	324	156	227
Ec-00_009830	2	0	25	39	17	62	40	29	14	25	19	86	166	112	205	17	11	24	30	38	32	5	5	20	20	13	26	12	25	22	26	153	115	65	99	33	27	4	13	5	2
Ec-00_009840	4	6	0	1	0	0	1	7	0	1	0	0	2	3	4	0	0	0	0	1	1	0	0	0	6	0	0	1	2	0	1	0	0	0	0	0	0	0	0	0	0
Ec-00_009850	64	60	135	202	114	131	79	99	76	76	64	58	76	21	51	5	9	26	24	5	1	7	8	5	1	0	1	2	4	8	6	16	27	25	25	2	2	6	13	13	16
Ec-00_009860	2	1	4	3	5	0	2	3	0	2	0	2	1	0	2	0	0	0	0	0	0	3	4	20	22	0	0	25	26	0	0	0	0	0	0	0	0	0	0	0	0
Ec-00_009870	4	2	34	67	44	140	113	67	111	181	117	140	91	128	187	14	6	18	14	22	20	12	6	44	45	22	27	55	38	12	38	109	101	86	75	18	24	0	3	10	1
Ec-00_009875	0	0	3	8	2	7	6	1	0	0	0	0	0	0	0	0	0	0	0	0	0	0	0	1	2	1	0	0	2	0	0	0	0	0	0	0	0	0	0	0	0
Ec-00_009880	4	2	111	155	101	133	371	187	383	465	213	363	359	167	557	275	194	186	231	369	322	144	93	394	392	822	925	474	425	658	744	607	550	429	472	201	437	261	446	452	882
Ec-00_009890	72	59	284	258	217	137	190	81	781	611	338	1337	1567	656	2773	379	997	194	239	413	368	832	596	783	611	2549	4158	420	415	2580	2837	2253	1773	2517	1590	151	2756	473	261	714	115
Ec-00_009900	6	3	33	33	17	16	50	16	12	50	27	14	24	3	1	44	1	3	7	2	2	8	4	13	4	1	2	8	3	3	4	23	27	5	9	0	2	1	1	4	6
Ec-00_009910	0	0	0	0	1	0	0	0	0	0	0	0	0	0	0	0	0	0	0	1	1	0	0	4	5	3	8	1	7	15	10	4	1	2	2	2	1	0	4	0	2
Ec-00_009920	18	13	371	414	225	299	320	261	66	204	216	704	725	308	799	188	341	210	197	383	334	89	67	123	101	578	1202	86	102	1063	1260	936	809	586	872	63	232	184	290	336	339
Ec-00_009930	24	13	1	18	11	5	4	5	5	18	7	188	137	56	277	8	2	1	2	117	86	1	2	89	75	67	53	72	106	136	155	125	208	244	382	34	9	45	75	131	168
Ec-00_009940	7	2	20	23	13	27	59	42	78	50	82	202	259	127	248	34	59	65	68	180	167	48	33	104	51	63	181	85	74	399	402	525	554	210	643	23	49	81	174	107	201
Ec-00_009950	3	1	258	266	189	262	403	294	192	424	416	348	251	104	463	356	325	436	364	369	273	81	42	236	157	538	650	126	168	522	558	245	270	254	265	227	269	182	276	275	347
Ec-00_009970	5	4	349	393	298	207	293	423	168	318	312	457	344	164	488	301	547	286	257	386	294	92	50	110	101	447	795	92	137	919	1043	336	357	236	305	152	509	275	406	433	883
Ec-00_009980	0	0	0	1	2	2	3	2	2	6	2	0	0	0	1	0	0	0	0	9	4	0	0	125	66	14	30	47	56	28	19	168	79	18	45	23	23	3	22	4	6
Ec-00_009990	17	19	0	0	0	0	0	0	0	0	0	2	3	1	82	0	1	0	7	484	399	0	0	201	114	79	233	112	117	654	803	2209	1538	1076	919	45	46	214	271	317	259
Ec-00_010000	0	0	0	0	0	0	0	0	0	0	0	0	0	0	0	0	0	0	0	0	0	0	0	0	3	0	0	1	0	0	0	0	0	0	0	0	0	0	0	0	0
Ec-00_010010	15	22	444	387	346	271	431	421	296	529	420	1092	731	328	1343	673	622	514	411	631	532	320	209	516	430	1126	1438	436	507	1233	1456	1165	1063	811	1076	369	565	364	594	440	742
Ec-00_010020	14	14	34	50	23	69	46	37	22	22	3	24	18	2	12	30	12	33	32	30	17	27	9	16	22	54	53	14	10	33	21	10	20	2	6	12	34	24	27	34	31
Ec-00_010030	596	421	520	448	465	355	680	236	33	35	28	13	44	7	4	4	0	0	9	25	12	0	0	13	11	2	0	11	11	2	2	4	13	6	12	1	1	1	2	0	0
Ec-00_010040	2	0	0	0	0	0	0	0	5	2	2	1	6	0	0	0	0	0	0	1	1	0	1	14	8	0	2	1	0	2	0	1	20	0	0	0	0	0	0	0	0
Ec-00_010050	0	0	0	0	1	0	0	0	1	2	0	3	6	0	5	0	0	0	1	1	3	0	0	8	2	9	7	27	35	19	7	80	65	67	8	1	0	18	13	5	9
Ec-00_010060	0	0	1	0	0	0	1	2	2	9	67	5	3	3	20	7	3	0	1	3	3	2	0	14	6	0	3	51	47	8	3	82	56	42	13	2	1	8	13	2	0
Ec-00_010070	0	2	0	5	2	1	3	0	1	2	0	2	2	0	37	0	0	4	0	38	28	14	16	616	734	249	360	568	559	543	619	603	452	368	343	88	46	58	89	50	67
Ec-00_010080	1	36	1	1	2	0	0	1	8	12	5	0	8	7	3	0	0	1	1	1	1	1	0	30	27	0	0	17	26	1	0	22	7	9	11	31	0	2	0	2	0
Ec-00_010090	2	1	3	4	1	9	9	6	16	14	23	134	129	75	142	49	20	36	29	50	55	52	43	105	115	64	28	140	87	57	73	102	89	77	159	64	20	15	21	8	49
Ec-00_010100	11	13	300	158	42	374	319	147	33	41	14	322	342	106	201	80	45	48	59	125	119	20	17	267	200	36	59	151	141	21	32	279	310	128	130	85	42	18	29	20	11
Ec-00_010110	24	19	426	409	114	242	235	144	15	38	27	292	264	26	59	36	16	34	42	23	35	3	0	144	152	27	42	254	165	28	29	43	98	41	17	17	14	38	4	14	12
Ec-00_010120	0	0	0	0	0	0	0	0	0	0	0	0	0	0	0	0	0	0	0	0	0	0	0	0	0	0	0	0	0	0	0	0	0	0	0	0	0	0	0	0	0
Ec-00_010130	9	3	90	57	45	31	51	27	18	24	4	19	27	1	13	1	6	0	1	12	12	4	3	10	7	13	9	20	18	17	10	16	51	14	12	1	3	13	12	12	15
Ec-00_010140	0	0	177	320	258	207	242	206	0	5	1	0	0	0	0	157	67	127	119	71	80	0	0	0	0	0	0	0	2	0	0	0	0	1	0	37	117	54	79	84	50
Ec-00_010150	41	27	179	266	263	85	241	217	222	278	153	103	115	50	102	164	83	141	125	88	106	20	15	63	79	208	260	71	105	218	195	120	120	58	72	34	145	75	122	78	232
Ec-00_010160	5	2	11	6	13	8	7	6	0	1	0	226	246	94	180	4	2	0	4	109	94	3	6	37	59	24	30	12	41	40	34	108	192	114	156	17	11	13	20	38	41
Ec-00_010170	9	14	243	172	262	213	502	310	349	363	631	720	866	212	456	141	186	170	222	210	223	63	29	498	506	213	147	417	469	258	257	1123	1222	232	169	52	904	109	145	144	221
Ec-00_010180	0	1	0	1	2	9	27	9	2	1	0	4	5	8	33	166	31	80	73	7	21	0	1	5	13	16	12	15	19	4	3	55	51	68	33	1	4	14	16	1	1
Ec-00_010190	8	3	42	49	36	37	56	42	32	36	38	82	51	29	89	2	17	2	3	2	7	15	7	58	44	14	7	44	66	5	17	90	52	47	61	10	7	2	4	5	8
Ec-00_010200	35	34	218	314	177	253	307	281	151	190	315	1370	858	343	1493	251	326	947	967	476	480	210	149	197	157	629	1405	100	198	608	824	434	385	831	229	52	563	103	87	194	130
Ec-00_010210	148	141	47	123	62	94	77	62	20	28	27	6	5	2	8	0	0	4	2	3	3	1	3	2	5	0	0	1	0	0	0	4	7	13	8	1	2	0	4	0	0
Ec-00_010220	2	0	183	313	225	253	268	198	47	106	102	249	216	90	271	174	210	192	155	246	201	15	9	67	32	229	383	40	70	514	518	369	395	179	307	53	89	132	218	219	573
Ec-00_010230	0	0	5	9	8	13	8	0	0	0	0	0	1	0	5	0	0	0	0	0	0	0	0	0	2	3	0	2	0	0	2	4	3	1	1	0	0	2	4	0	5
Ec-00_010240	4	8	18	20	21	10	26	20	66	72	54	362	261	98	241	236	191	95	139	127	150	162	122	127	112	131	225	103	93	264	267	167	187	194	252	35	77	108	143	115	180
Ec-00_010250	0	0	1	11	5	17	15	9	0	0	6	0	0	0	5	0	1	1	0	3	1	4	2	0	1	0	0	0	0	3	0	0	0	1	1	0	0	0	1	1	1
Ec-00_010260	0	0	0	0	0	0	0	1	0	0	0	0	0	0	9	0	0	0	0	78	50	0	0	19	11	53	175	17	14	444	599	316	222	124	105	13	9	9	18	24	13
Ec-00_010270	0	0	0	0	0	0	0	0	0	0	0	0	0	0	0	0	0	0	0	0	0	0	0	0	0	0	0	0	0	0	0	0	0	0	0	0	0	0	0	0	0
Ec-00_010280	0	0	2	2	3	1	0	0	2	3	7	1	4	1	1	0	0	1	0	0	1	0	0	2	2	0	0	5	0	0	0	7	7	3	7	0	0	0	0	0	0
Ec-00_010290	0	0	3	5	1	4	2	2	0	0	1	0	0	0	0	0	0	0	0	0	0	0	0	0	0	0	0	0	1	0	0	0	0	0	0	0	1	0	0	0	0
Ec-00_010300	0	0	16	27	7	31	14	13	54	103	75	148	111	76	126	1	2	0	2	0	0	2	1	110	116	0	0	74	79	0	0	145	100	101	173	0	0	0	1	0	0
Ec-00_010310	0	0	14	34	16	116	128	87	3	4	13	135	131	18	138	13	40	15	4	34	29	3	4	29	28	90	263	8	13	110	125	199	113	103	53	10	76	16	24	28	67
Ec-00_010320	0	0	0	0	0	0	0	0	0	0	0	0	0	0	0	0	0	0	0	3	0	0	0	0	0	0	0	0	0	0	0	0	0	0	0	0	1	0	0	0	1
Ec-00_010330	5	1	276	220	163	171	563	525	38	70	329	896	507	167	1119	193	835	339	221	562	487	127	84	97	60	492	1667	43	94	865	1126	785	667	632	458	90	528	174	284	334	330
Ec-00_010340	0	0	0	0	0	0	0	0	0	0	0	0	0	0	0	0	0	0	0	0	0	0	0	0	0	0	0	0	0	0	0	0	0	0	0	0	0	1	0	0	0
Ec-00_010350	0	0	0	3	5	12	10	3	3	5	2	6	8	10	6	3	1	3	2	0	3	4	0	11	12	8	17	6	21	15	12	2	7	5	7	4	4	1	2	1	2
Ec-00_010370	49	41	695	753	491	336	424	485	301	633	321	664	697	275	696	379	546	370	373	742	541	98	52	224	135	879	1583	177	231	1651	1982	1019	964	585	810	142	507	277	436	481	855
Ec-00_010380	8	6	40	34	20	66	120	52	41	83	84	701	725	155	406	170	45	90	63	238	205	88	52	358	350	296	312	229	288	133	190	372	411	260	340	76	36	69	155	87	190
Ec-00_010390	0	0	3	6	5	8	107	7	2	23	22	128	84	42	90	3	9	5	4	2	3	24	5	77	79	12	19	45	90	3	5	94	112	62	58	2	1	4	1	2	11
Ec-00_010400	33	19	533	567	366	425	706	452	1421	1873	1177	1150	979	347	1241	853	789	753	748	907	811	475	274	483	244	1165	1770	300	325	1390	1699	1443	1168	822	677	275	978	433	746	485	504
Ec-00_010410	3	0	39	78	44	32	70	53	46	56	40	115	55	32	97	57	48	37	40	36	45	40	27	101	86	168	213	78	60	188	216	61	48	75	84	29	46	11	28	17	29
Ec-00_010420	7	6	115	179	120	97	112	99	58	146	147	437	343	173	375	240	408	221	204	192	184	81	61	108	106	361	391	93	113	649	710	273	267	337	503	69	241	260	308	313	516
Ec-00_010430	25	15	230	298	237	266	266	258	271	569	379	192	110	73	246	54	65	78	82	101	114	39	14	86	55	37	21	109	133	34	41	184	145	64	107	125	42	24	33	16	50
Ec-00_010440	2	2	31	26	18	22	28	22	8	22	19	41	34	27	57	13	10	15	16	32	21	2	2	8	9	14	9	6	7	17	15	52	51	15	58	21	12	7	8	10	16
Ec-00_010450	1	1	0	2	1	2	0	1	0	1	0	0	2	3	1	3	1	0	1	1	0	2	0	2	1	0	1	7	1	1	0	0	1	0	1	1	2	0	0	0	1
Ec-00_010460	10	6	12	13	5	7	11	4	1	3	4	0	2	2	1	0	0	0	0	1	1	2	4	9	6	0	0	5	11	0	1	2	3	0	0	0	0	0	0	0	1
Ec-00_010470	6	8	23	15	10	227	298	73	162	177	183	726	794	558	1116	538	273	262	248	344	367	200	170	776	696	1292	1071	546	420	997	1052	1104	762	843	866	375	277	105	201	136	92
Ec-00_010480	5	5	23	33	29	11	28	33	5	14	7	68	79	41	83	16	20	18	23	26	32	28	30	30	24	13	17	32	26	24	27	62	57	58	100	4	19	11	8	17	13
Ec-00_010490	30	19	361	393	286	223	252	231	239	356	161	391	351	197	506	291	251	223	211	356	318	40	34	193	160	472	507	148	207	528	602	549	544	349	517	153	376	175	269	303	657
Ec-00_010500	0	0	0	0	0	0	1	0	0	0	0	0	0	0	1	0	0	0	0	0	0	0	0	0	0	0	0	0	0	0	0	0	1	1	0	0	0	0	0	0	0
Ec-00_010510	0	0	11	15	13	20	52	27	20	28	84	52	170	70	109	92	80	96	96	6	8	42	26	7	6	6	2	2	4	0	2	3	1	0	0	1	1	0	1	1	0
Ec-00_010520	468	414	792	855	535	751	878	666	348	398	318	2304	3170	1230	2362	523	642	604	625	719	819	818	659	1212	1980	1468	1793	1631	1515	2494	2625	2409	2678	1636	2729	244	638	431	573	434	499
Ec-00_010530	0	0	72	141	81	166	121	60	1	2	2	0	0	1	2	239	153	161	159	79	98	0	0	0	2	0	0	2	1	0	0	0	0	0	0	474	88	235	451	102	216
Ec-00_010540	7	7	7	18	16	29	20	11	2	3	2	775	698	125	360	3	1	2	10	205	166	9	3	390	326	219	152	191	263	103	159	368	497	204	538	59	4	55	124	138	232
Ec-00_010550	22	9	106	132	49	122	252	139	254	184	265	485	511	356	1026	414	358	274	186	63	144	301	235	251	199	90	26	471	401	71	64	164	285	155	23	35	5	21	17	25	17
Ec-00_010560	11	4	51	84	41	123	179	147	129	147	684	734	715	348	812	197	147	217	233	275	295	210	172	398	478	487	721	342	327	892	931	826	746	604	976	142	262	161	310	171	286
Ec-00_010570	1010	834	14198	18748	12601	19351	32287	26880	51981	71293	50536	53754	49419	29963	66573	59734	37486	55959	55626	38921	41571	28664	19229	99858	77434	100980	132844	67204	84733	106549	116621	56960	56633	35968	47577	39763	40068	16056	24431	17821	23632
Ec-00_010580	3	6	7	1	3	3	8	6	1	3	4	319	391	79	405	5	4	0	1	115	104	4	0	184	137	115	47	84	162	121	144	224	493	292	377	36	8	45	76	135	170
Ec-00_010590	0	0	54	76	36	112	60	35	0	1	0	0	0	0	0	85	68	55	69	122	116	0	0	0	2	0	0	0	0	0	0	0	0	0	0	168	129	101	145	80	28
Ec-00_010600	5	5	107	220	117	182	201	163	78	123	83	195	148	46	152	66	76	80	69	99	114	52	47	350	223	195	184	222	201	194	218	239	210	152	119	97	103	47	102	47	57
Ec-00_010610	6	5	39	62	23	74	73	48	22	37	31	183	159	95	170	0	1	2	1	2	2	56	60	134	179	255	326	161	143	318	310	142	138	158	207	2	1	0	0	1	1
Ec-00_010620	7	6	11	26	12	36	59	23	21	51	47	334	313	105	396	28	16	31	25	316	228	12	19	292	283	389	349	186	224	329	307	486	442	415	810	229	175	54	164	131	151
Ec-00_010630	4	8	13	20	14	6	18	14	0	6	3	423	345	159	466	9	18	10	11	261	242	36	31	162	199	160	152	98	154	238	281	1096	1486	268	888	51	29	72	157	134	234
Ec-00_010635	0	0	2	0	1	7	9	5	0	0	0	0	0	0	0	0	0	0	0	0	0	0	0	0	0	0	0	0	0	0	0	1	1	1	2	0	0	0	0	0	0
Ec-00_010640	6	4	22	20	12	42	58	35	27	51	43	636	676	121	344	100	25	75	45	204	194	41	34	184	167	233	248	71	125	121	162	379	434	195	250	45	14	46	119	66	140
Ec-00_010650	0	0	0	0	0	4	1	0	1	2	2	9	7	3	9	1	0	0	1	17	11	3	1	12	10	15	23	11	10	10	6	30	23	8	22	18	11	1	4	3	7
Ec-00_010655	0	0	0	1	0	0	0	0	0	0	0	0	0	0	0	0	0	0	0	5	3	0	0	135	158	62	79	173	164	133	122	0	0	0	0	5	0	9	37	16	21
Ec-00_010660	1	0	0	0	0	0	0	1	0	0	0	9	8	0	20	0	0	0	0	9	8	1	0	47	51	204	216	117	67	317	281	12	16	4	14	1	0	83	110	59	37
Ec-00_010670	0	0	0	0	0	5	3	1	0	0	0	0	0	0	0	0	0	0	0	1	0	0	0	0	0	0	0	0	0	0	0	0	0	0	0	0	0	0	0	1	1
Ec-00_010690	2	0	0	0	1	1	4	4	5	1	2	56	45	95	113	4	6	11	8	26	17	6	8	57	73	49	41	77	70	93	102	92	79	83	100	20	14	18	50	15	26
Ec-00_010700	35	35	198	319	150	161	284	240	61	92	459	450	692	117	257	109	127	107	82	96	88	92	88	183	105	66	113	80	86	228	250	431	709	307	426	19	72	74	58	101	97
Ec-00_010710	0	0	1	1	1	5	20	1	11	6	5	54	77	27	59	26	31	32	16	37	42	6	7	37	23	46	85	24	29	119	154	79	102	52	47	7	17	18	31	55	92
Ec-00_010720	1	1	4	1	2	74	76	22	26	38	51	410	401	288	501	161	95	95	85	163	173	36	32	134	109	374	436	89	82	426	447	647	435	355	366	77	115	68	97	97	139
Ec-00_010730	570	502	103	358	152	338	169	128	200	132	199	254	206	91	230	72	60	50	57	66	70	75	66	429	568	172	153	665	572	169	170	159	172	216	205	87	189	116	169	178	128
Ec-00_010740	0	2	21	15	8	19	146	32	9	25	107	576	744	410	629	43	150	241	131	34	39	90	69	14	30	53	24	23	13	14	24	63	266	30	1	2	2	61	60	20	17
Ec-00_010750	4	6	24	26	12	19	29	22	68	84	48	177	94	38	80	87	43	25	35	31	36	62	60	96	121	19	22	157	115	26	20	66	75	66	93	38	22	17	36	22	21
Ec-00_010760	13	8	56	38	28	29	38	43	122	139	105	488	257	139	298	372	174	137	153	140	163	194	136	204	232	196	226	245	229	292	294	182	188	223	251	85	80	71	146	79	117
Ec-00_010770	685	570	435	386	200	257	413	200	101	102	166	1471	859	170	728	194	279	42	48	119	132	175	141	279	341	670	821	187	255	231	277	350	314	617	439	84	509	76	85	144	84
Ec-00_010780	4	1	6	0	0	81	112	29	57	56	70	438	457	267	590	245	107	96	117	185	186	63	58	199	231	476	555	110	119	528	486	642	422	427	368	93	112	57	97	60	65
Ec-00_010790	0	0	0	0	0	0	1	0	0	0	0	0	0	0	0	0	0	0	0	0	0	0	0	0	0	0	0	0	0	0	0	0	0	0	0	0	0	0	0	0	0
Ec-00_010800	1465	1188	4057	5244	3728	2931	9321	5985	5049	4833	10197	62676	97269	37908	42828	4002	5247	8333	8287	8095	10172	6980	5260	15906	15336	9393	11050	12806	15609	23518	21655	55319	84776	21830	79596	2230	1668	16132	29381	11726	13533
Ec-00_010810	0	0	0	0	0	0	0	0	0	0	0	0	1	7	11	3	0	0	0	0	1	0	0	2	0	0	0	0	0	0	2	0	1	0	1	0	0	0	0	0	0
Ec-00_010820	69	54	36	47	43	81	69	36	32	84	22	135	205	73	109	18	11	20	20	36	22	7	8	144	119	21	8	74	101	45	33	135	195	126	186	26	4	12	26	34	31
Ec-00_010830	122	98	1320	1521	831	1339	2509	1794	775	851	1490	5980	6642	3432	7221	1404	1765	1612	1439	1680	1769	1951	1775	2938	2855	5654	10068	1550	2191	5813	6427	4692	3981	3368	4276	481	1783	788	1126	956	978
Ec-00_010840	10	4	117	94	56	175	165	110	53	87	108	256	239	157	384	120	92	112	96	76	113	175	154	412	434	320	299	249	328	164	191	216	144	167	205	66	112	36	47	43	18
Ec-00_010850	8	6	12	16	19	27	47	40	6	18	15	617	502	158	595	14	6	4	10	257	175	7	16	368	385	189	112	218	272	228	214	245	449	418	976	108	17	76	201	263	465
Ec-00_010860	9	9	6	16	11	8	20	9	7	11	11	710	664	170	775	12	13	3	7	201	153	8	9	723	648	244	132	426	682	248	287	517	829	554	638	112	41	94	190	368	487
Ec-00_010870	0	0	0	0	0	0	0	0	0	0	0	1	0	0	3	0	0	0	0	1	0	0	0	0	0	0	0	1	0	0	0	0	0	0	0	0	0	0	0	0	0
Ec-00_010880	93	87	25	61	57	14	15	27	8	10	6	3171	4085	757	1755	32	20	22	40	1314	952	46	26	1267	1129	518	535	719	1102	786	848	2033	3298	1609	2664	110	55	296	536	669	493
Ec-00_010890	15	9	435	538	349	329	785	555	235	279	244	477	457	113	390	433	131	333	301	409	421	108	65	450	376	431	847	280	434	359	429	523	492	232	162	123	106	90	228	121	192
Ec-00_010900	3	1	32	31	20	31	24	24	44	70	50	143	88	77	147	44	62	45	49	59	47	22	20	84	40	29	78	30	41	27	32	84	73	59	92	26	18	8	24	10	26
Ec-00_010910	97	82	289	407	253	325	415	309	267	528	379	1140	1180	670	1852	383	313	584	517	613	549	238	226	192	211	188	184	152	196	294	219	1054	1066	1209	1789	379	138	94	92	186	179
Ec-00_010920	355	244	663	716	611	296	460	471	308	412	242	381	399	183	530	265	264	180	200	227	227	197	108	252	252	522	641	245	320	546	611	373	390	344	466	153	192	152	215	166	343
Ec-00_010930	10	5	107	154	70	179	251	145	101	185	113	397	327	148	409	187	97	101	119	110	163	158	143	372	435	256	343	399	355	227	235	316	315	205	302	118	74	76	116	67	71
Ec-00_010940	8	3	53	85	76	112	143	117	32	49	47	383	362	88	249	58	43	34	36	95	61	44	21	187	186	265	237	178	141	344	320	306	337	403	272	39	74	85	87	133	128
Ec-00_010950	1412	1284	110	230	170	213	178	119	212	248	169	626	800	301	673	115	162	133	171	187	181	95	96	449	470	194	220	390	472	353	350	657	665	510	704	113	164	105	138	133	94
Ec-00_010960	58	41	142	190	130	517	561	403	797	1099	963	2530	2666	1235	2577	1961	897	2121	1694	1249	1163	1019	845	2143	2580	1012	1283	1419	1542	1117	1122	2660	2209	2165	2938	685	687	289	492	428	326
Ec-00_010970	58	59	105	194	97	231	199	110	182	112	310	1303	1388	1071	1173	215	89	175	160	91	208	283	275	4071	5159	401	184	3787	4670	392	329	1262	1538	521	1612	460	66	359	737	197	165
Ec-00_010980	158	126	216	376	197	386	638	378	326	384	581	1640	1718	1587	3408	681	281	1791	1621	1484	1496	621	539	3010	2408	1223	1648	2308	2403	2078	1853	2245	1981	2880	5946	536	384	484	1287	633	1706
Ec-00_010990	43	37	16	41	31	65	69	41	34	48	21	312	336	96	254	6	0	8	8	11	11	4	9	330	307	122	116	212	227	142	120	214	294	242	255	13	10	10	30	15	28
Ec-00_011000	0	0	0	4	3	7	3	0	0	0	0	2	1	1	2	0	0	1	0	1	0	0	0	6	4	0	2	3	2	1	3	7	6	3	7	0	0	0	1	0	0
Ec-00_011005	6	6	21	30	42	53	70	31	19	33	20	377	406	223	375	29	19	28	38	54	51	21	9	316	461	154	142	351	426	149	123	325	507	207	359	73	39	55	73	68	48
Ec-00_011010	0	0	0	0	0	0	0	1	0	0	0	22	23	3	22	0	0	0	1	8	8	0	0	107	117	346	414	216	150	460	568	26	35	16	25	3	0	117	162	98	122
Ec-00_011020	0	0	0	0	0	0	0	0	0	0	0	0	0	0	0	0	0	0	0	0	0	0	0	0	0	0	0	0	0	0	0	0	0	0	0	0	0	0	0	0	0
Ec-00_011040	0	0	9	5	5	4	21	12	0	0	0	0	0	0	0	34	21	20	15	59	33	0	0	0	0	0	0	1	0	0	0	0	0	0	0	10	29	18	23	25	41
Ec-00_011050	3	2	226	271	177	173	227	271	62	112	76	402	283	111	382	49	249	59	75	131	100	80	45	45	36	214	444	70	69	385	465	172	130	259	178	27	264	107	131	119	195
Ec-00_011060	45	45	91	143	79	339	405	128	420	304	1169	3862	3478	1191	2424	367	383	342	417	665	736	535	385	6794	7290	1294	1416	8393	8913	1646	1500	4586	5337	1290	2915	1006	651	1312	2312	740	1372
Ec-00_011070	23	25	550	763	560	970	1039	881	1432	2127	1629	1646	1530	941	2141	2692	848	1928	1650	893	801	731	544	2263	1924	1556	1300	1739	2155	977	1180	1628	1493	926	1353	1334	578	484	947	610	976
Ec-00_011080	1	0	1	4	2	0	1	1	0	0	2	363	603	117	252	1	7	2	1	172	143	0	1	43	31	115	92	13	40	72	116	257	483	153	364	5	5	54	130	160	277
Ec-00_011090	82	75	231	249	180	291	236	169	257	259	189	489	537	269	682	186	147	140	154	184	165	162	146	894	984	492	559	773	868	297	291	732	621	437	479	208	333	74	141	126	61
Ec-00_011100	1708	1407	154	313	244	132	227	249	138	136	222	776	757	242	600	102	207	93	92	222	178	110	85	228	231	294	403	199	224	553	585	594	639	578	613	46	330	155	249	243	194
Ec-00_011110	0	1	0	0	1	0	4	1	21	20	5	0	2	0	2	0	0	6	6	25	23	0	0	1	4	0	1	0	0	0	0	0	0	8	1	3	10	1	0	0	0
Ec-00_011120	4	0	7	7	2	0	0	1	0	0	2	7	2	10	1	1	0	2	3	1	1	2	0	1	5	2	1	4	2	0	0	6	0	16	3	2	1	1	0	1	0
Ec-00_011130	186	136	611	911	495	729	1129	819	406	531	912	1989	2446	1118	2146	870	709	1062	957	277	313	927	728	775	895	394	434	657	727	715	800	968	1053	575	1433	248	193	225	299	178	189
Ec-00_011140	0	0	0	0	0	0	0	0	0	0	0	0	0	0	0	0	0	0	0	0	0	0	0	0	0	0	0	0	0	0	0	0	0	0	0	0	0	0	0	0	0
Ec-00_011150	2	3	4	10	2	8	2	16	1	3	1	19	2	8	8	3	0	2	3	1	0	0	1	9	9	2	1	24	7	0	0	10	5	6	7	6	0	5	2	2	2
Ec-00_011160	4	2	91	66	48	156	231	150	321	363	144	734	678	282	466	442	125	244	283	232	242	201	127	605	630	302	425	650	796	281	262	493	403	443	300	199	170	171	216	139	122
Ec-00_011170	253	180	63	91	81	47	74	36	17	20	20	71	90	29	82	24	38	20	26	58	65	27	17	31	18	71	78	17	50	89	89	72	106	72	86	10	48	13	26	12	43
Ec-00_011180	4	11	96	128	82	83	56	30	2	0	0	14	27	20	8	6	5	15	9	13	17	2	0	2	3	14	5	3	5	6	6	28	17	16	44	16	2	5	9	8	19
Ec-00_011190	15	7	131	186	111	65	65	89	55	96	68	347	300	148	418	199	85	125	120	227	207	53	57	107	152	368	437	70	134	469	525	371	378	341	492	67	67	127	203	166	196
Ec-00_011200	83	76	325	267	144	145	506	326	569	794	582	2709	4077	1868	3475	311	730	682	679	643	664	548	440	400	445	2226	5013	310	317	3913	4205	1778	1813	1585	1814	41	421	383	614	411	443
Ec-00_011210	7	6	55	71	55	70	101	67	54	89	68	190	151	84	182	103	69	68	75	64	69	76	38	97	125	136	164	77	84	153	151	129	141	121	183	56	33	41	53	43	63
Ec-00_011220	0	0	1	4	0	9	1	2	0	0	0	1	0	0	0	0	0	0	0	0	0	0	0	1	0	0	0	0	0	0	0	0	0	0	0	0	0	0	0	0	1
Ec-00_011230	0	0	33	53	33	76	67	68	6	7	66	6	27	102	178	20	55	59	38	30	32	0	0	14	5	3	31	6	2	1	1	19	14	9	6	40	1	7	23	8	10
Ec-00_011240	3	1	116	101	46	158	135	73	60	140	99	167	162	62	127	175	124	145	106	157	111	15	4	49	29	202	319	45	52	369	444	208	229	127	192	55	135	93	123	88	173
Ec-00_011250	325	257	334	278	235	310	379	245	240	295	176	514	696	262	584	257	158	182	159	188	168	179	147	444	395	234	266	257	478	242	260	567	698	441	483	86	128	112	130	145	200
Ec-00_011260	27	24	194	249	202	212	234	205	167	181	170	1502	1358	897	1916	440	316	338	290	391	431	382	348	662	1107	941	800	853	775	906	971	1017	1019	1035	1461	351	255	245	406	388	707
Ec-00_011270	0	0	15	23	18	30	41	14	15	15	21	88	87	34	100	39	14	31	30	11	20	18	12	94	86	58	43	129	112	93	82	69	66	44	82	32	21	38	58	41	65
Ec-00_011280	2	2	5	10	6	16	26	9	18	15	23	192	157	81	215	45	30	25	28	43	36	40	26	91	105	26	32	115	80	92	98	157	173	122	203	34	44	39	71	30	71
Ec-00_011290	0	0	49	75	43	63	41	35	1	1	2	0	1	0	0	79	42	83	69	77	112	0	0	2	1	0	0	0	2	0	0	0	2	0	0	168	59	58	109	59	26
Ec-00_011300	380	297	757	1032	546	494	627	627	540	722	522	1417	1108	283	1116	2070	1099	536	491	462	453	1302	1010	238	166	537	423	216	126	133	170	860	708	800	587	257	382	1	0	13	9
Ec-00_011320	20	23	123	148	94	68	127	100	32	47	40	33	33	17	48	87	43	22	34	24	30	80	52	13	13	0	4	13	13	0	1	19	14	32	9	12	14	0	0	0	1
Ec-00_011330	265	201	205	154	188	70	121	140	54	85	47	270	354	202	331	66	107	58	45	84	76	70	73	54	41	158	221	41	36	176	220	266	290	249	445	12	49	42	66	71	117
Ec-00_011340	577	454	10	61	129	53	41	44	19	18	27	1470	1372	502	1830	31	27	11	22	354	251	73	54	660	879	385	248	781	1013	680	678	747	1124	1764	2748	134	55	223	327	632	378
Ec-00_011350	39	30	371	468	276	276	516	448	516	839	521	553	443	143	478	968	754	439	426	349	306	277	168	323	207	1008	1588	223	200	474	549	289	317	218	182	199	542	126	197	180	196
Ec-00_011360	12	17	1	6	14	33	43	9	40	40	20	80	117	48	132	22	9	6	17	42	43	3	4	134	99	43	49	68	83	81	73	160	181	135	197	45	40	61	92	105	129
Ec-00_011370	2	1	26	36	28	18	37	25	7	15	9	11	13	3	13	0	0	0	0	0	0	2	5	10	13	1	2	7	7	0	0	11	15	11	15	0	0	1	1	0	0
Ec-00_011380	7	5	116	180	87	123	262	149	114	127	119	313	310	152	354	126	87	99	134	135	148	133	75	187	164	266	461	162	187	365	379	276	325	152	313	62	51	64	173	83	157
Ec-00_011390	1044	830	903	1268	705	2003	1398	968	1416	1239	1581	3452	3861	1915	4690	1675	1052	1471	1363	872	1008	1990	1701	5412	6190	1690	1506	4913	5412	1253	1232	2728	2402	2354	3106	1157	779	686	975	837	1311
Ec-00_011400	7	11	98	193	139	148	215	189	143	230	92	646	569	272	831	212	208	123	159	271	293	183	147	597	614	412	588	497	479	426	519	725	549	645	638	184	206	161	225	209	188
Ec-00_011410	11	15	9	10	9	11	37	31	26	20	16	170	230	70	157	10	43	32	56	72	52	46	33	29	19	81	131	25	23	133	127	151	148	137	162	4	24	35	57	64	104
Ec-00_011420	44	35	79	140	180	91	27	74	15	31	5	451	499	174	268	2	4	12	19	131	94	7	5	214	221	72	45	162	187	93	112	205	359	312	372	29	11	43	55	72	95
Ec-00_011430	5	5	60	123	50	55	204	98	85	94	217	252	341	219	674	200	325	187	176	60	94	102	101	12	12	108	46	7	1	5	20	9	9	9	14	27	51	7	3	6	3
Ec-00_011440	1	0	1054	1402	418	1717	1799	352	0	6	17	0	2	19	8	11684	3427	18958	12230	12578	14089	1	2	10	18	20	9	10	28	12	12	19	13	10	14	11418	9516	2090	6921	3622	10608
Ec-00_011450	44	32	506	569	431	242	375	413	266	477	228	468	327	151	589	319	338	275	283	436	380	128	81	331	265	638	785	286	379	831	816	622	572	438	483	188	417	256	372	325	471
Ec-00_011460	11	13	285	228	152	263	340	263	186	222	137	469	449	232	500	225	170	145	182	209	244	192	158	277	423	532	615	424	373	615	541	389	405	293	636	155	137	136	178	140	215
Ec-00_011470	11	4	205	215	147	178	255	167	342	548	424	380	357	194	485	462	377	301	289	269	242	132	81	489	200	585	818	195	163	312	401	248	275	243	289	109	93	89	141	130	225
Ec-00_011480	23	13	8	20	14	16	5	7	12	11	11	702	640	217	707	42	18	10	11	227	159	15	11	801	655	305	138	425	761	291	285	475	589	517	609	149	24	144	265	314	463
Ec-00_011490	1	0	3	2	3	2	1	10	2	1	7	1	2	0	6	2	0	1	1	0	0	0	0	0	1	0	0	2	2	1	0	1	2	1	1	0	0	1	2	0	1
Ec-01_000010	0	0	0	0	0	0	0	0	0	0	0	0	0	0	0	0	0	0	0	0	0	0	0	0	0	0	0	0	0	0	0	0	0	0	0	0	0	0	0	0	0
Ec-01_000020	2	1	54	119	83	110	158	112	58	94	31	89	88	62	144	26	14	11	26	19	31	16	13	94	94	104	103	59	65	40	50	71	57	52	88	34	19	18	38	13	26
Ec-01_000030	1	0	27	42	31	57	66	63	41	65	21	50	54	40	96	14	17	15	15	27	27	8	7	42	38	47	88	33	46	41	28	50	26	50	54	34	15	17	13	15	19
Ec-01_000040	2	0	18	15	22	39	26	23	20	21	13	46	44	22	65	8	14	6	8	12	9	2	3	22	25	54	65	16	28	25	31	35	36	27	35	19	8	7	10	9	14
Ec-01_000050	1	0	11	22	7	10	14	17	5	7	1	39	164	427	574	24	8	8	6	186	182	12	7	22	21	43	15	14	52	31	252	35	19	25	10	6	1	6	7	8	11
Ec-01_000060	261	216	164	212	128	145	264	155	100	107	174	1131	1069	253	660	81	136	84	70	316	210	95	81	276	241	96	97	117	142	50	81	329	569	265	280	35	42	59	126	144	166
Ec-01_000070	419	360	1536	1463	1162	1317	1941	1827	1048	1395	1427	5844	5364	2414	6000	1732	2666	1484	1477	2379	2237	1601	1349	2318	2395	4216	6476	1976	2036	6587	7472	5557	4581	4592	6225	1026	2368	1398	2119	2145	2653
Ec-01_000080	24	27	4	9	11	3	4	7	0	0	1	1098	1123	180	267	10	5	3	2	111	88	7	6	477	449	45	19	257	431	81	89	387	653	522	356	48	8	125	100	131	122
Ec-01_000090	59	58	187	257	129	276	372	272	218	327	304	2224	2301	1040	2223	447	519	526	544	708	750	516	411	830	997	945	1520	908	898	2017	1908	2095	1944	1738	2635	247	282	529	855	607	394
Ec-01_000100	1151	889	406	648	497	332	655	444	1529	1393	2423	7411	7973	4188	11115	1364	5418	1514	1468	1680	1592	2554	1759	1607	1437	7234	13957	1593	1675	28777	30992	8174	7269	8910	9295	228	8246	2441	1308	2142	1744
Ec-01_000110	31	18	51	66	57	28	52	56	50	97	76	372	434	194	273	61	78	73	75	149	133	78	51	98	68	95	234	51	77	222	217	471	504	339	527	31	93	113	139	122	111
Ec-01_000120	128	123	557	508	484	386	642	607	712	1000	698	1894	2025	781	1919	693	614	572	575	921	779	516	361	906	715	1179	1809	608	739	1613	1765	2403	2902	1748	2571	257	1238	496	743	790	876
Ec-01_000130	2003	1564	476	641	433	565	786	500	232	296	309	1704	1947	833	1824	624	433	421	409	523	552	565	401	1506	1501	1025	1393	1170	1256	1040	1107	1881	1702	1208	1548	322	579	295	401	404	390
Ec-01_000140	87	59	874	885	569	911	1334	815	413	473	431	1832	1942	1022	2247	914	465	727	681	746	735	812	629	2206	2436	1315	2030	1764	2039	1373	1542	2232	2604	1300	2388	428	379	381	619	446	620
Ec-01_000150	155	145	3	16	20	2	10	4	14	27	26	644	630	133	396	25	7	19	40	173	128	19	14	232	213	167	120	159	203	106	151	355	500	300	428	111	11	72	137	119	143
Ec-01_000160	8	4	130	91	76	237	406	257	193	195	171	730	858	470	841	261	130	275	252	348	397	251	160	606	594	441	572	500	553	512	513	807	868	509	698	124	165	175	261	197	175
Ec-01_000170	10	9	27	33	33	95	100	66	216	242	124	837	717	321	679	190	53	108	177	355	358	66	53	646	610	291	262	510	642	260	305	515	636	435	820	267	101	183	398	287	640
Ec-01_000180	81	64	1103	1537	947	889	1644	1329	1029	1059	1042	3820	3935	2357	5003	919	1283	672	865	1113	1152	1435	1093	2508	2345	2291	3409	2120	2194	3682	3871	4273	4088	3062	5547	538	937	883	1424	1122	2058
Ec-01_000190	194	134	755	812	576	512	1276	763	1037	1082	1550	3338	4775	1341	2920	1999	1338	1773	1928	837	876	1941	1488	2521	2104	494	754	1239	1263	865	796	2273	2869	755	3022	143	59	436	1240	457	1076
Ec-01_000200	4	6	6	11	5	8	7	0	4	7	1	254	284	69	105	0	2	1	6	66	49	7	2	155	114	26	23	75	97	41	63	156	283	140	224	15	0	22	47	82	67
Ec-01_000210	9	7	42	43	42	71	120	36	37	57	38	581	549	195	617	79	67	56	63	240	191	89	63	175	194	363	485	132	156	586	702	425	505	635	824	69	75	132	209	203	231
Ec-01_000220	22	12	201	288	146	266	425	248	106	173	120	1214	1149	667	1334	295	300	259	241	291	330	321	250	382	539	607	854	555	441	983	989	849	674	767	953	75	226	203	232	177	215
Ec-01_000230	75	54	547	844	423	509	649	552	392	376	299	2011	2075	1154	2135	508	468	342	416	537	527	513	438	1538	1701	1191	1716	1154	1421	1817	1950	1355	1371	1416	1892	230	320	340	462	379	511
Ec-01_000240	57	66	193	278	346	428	1141	731	1413	1914	3275	9289	9073	4110	9837	3655	3941	3995	3536	2371	2865	2323	1690	2627	3331	2280	3350	2202	2686	3611	3595	4965	4289	4732	3402	959	1647	958	1091	1268	1336
Ec-01_000250	17	9	106	133	108	173	200	167	238	247	215	914	960	510	1058	464	232	311	334	275	347	254	233	790	930	659	620	962	1083	864	908	947	994	655	1619	375	180	208	419	242	526
Ec-01_000260	92	89	1414	1236	944	1339	2273	1635	882	940	781	4304	4626	2342	5683	1575	1326	1316	1283	1465	1412	1699	1399	1880	2200	3127	4650	1895	1695	2808	3033	4706	4183	3293	3868	626	1738	777	916	949	1268
Ec-01_000270	17	12	424	501	368	608	1032	746	173	236	237	1375	1641	583	1466	377	241	368	330	421	423	256	247	597	855	1327	2140	644	638	1228	1346	1163	995	912	809	174	206	196	286	278	363
Ec-01_000280	11	7	116	183	96	151	143	114	139	161	130	991	921	520	929	181	185	164	180	191	259	251	212	413	438	354	402	432	449	773	711	559	735	492	2057	151	205	201	342	142	301
Ec-01_000290	23	17	370	629	295	265	522	523	120	191	163	2026	1298	723	1813	517	492	399	363	557	630	711	557	1396	1644	1257	1343	1648	1323	2046	1954	1078	1004	1568	2746	491	470	422	666	392	340
Ec-01_000300	7	2	13	9	11	19	25	33	14	32	34	850	748	280	1074	23	20	13	12	275	199	19	19	150	246	377	206	229	280	1044	975	472	984	1479	1941	49	60	214	248	626	637
Ec-01_000310	7	11	225	365	204	169	341	293	159	212	121	803	523	254	669	231	319	167	197	240	277	191	157	229	249	547	653	331	257	693	733	415	330	495	381	180	309	167	257	176	285
Ec-01_000320	71	49	256	255	375	263	419	316	116	90	165	1251	1288	682	1634	231	232	530	501	475	599	238	157	942	873	528	577	1151	1106	1186	1194	992	1144	1053	1600	200	277	334	735	415	776
Ec-01_000330	671	616	743	779	554	482	712	608	467	567	550	2492	2774	1772	3208	664	654	695	725	922	852	705	600	874	980	1295	1862	746	821	2125	2416	2996	2898	1846	3618	397	506	614	1002	762	885
Ec-01_000340	385	277	855	1061	802	552	978	819	397	562	1006	1508	1461	507	1692	748	1076	814	725	781	717	709	520	518	474	1395	2067	427	443	2199	2687	1258	1303	1639	1704	214	966	509	557	778	654
Ec-01_000350	138	137	355	498	267	440	411	251	249	311	459	477	399	181	550	297	222	184	163	122	139	351	300	460	499	197	197	413	386	179	184	260	259	464	485	132	280	91	109	137	52
Ec-01_000360	13	20	1250	1658	1222	1507	3490	2817	396	423	748	4420	4566	1470	4190	1276	1263	1121	954	1231	1312	1016	776	1131	1064	3631	7036	852	926	4673	5396	3474	2807	2285	1913	278	1206	423	622	571	629
Ec-01_000370	14	16	76	65	41	71	103	64	62	32	73	829	750	229	577	44	32	55	62	277	206	21	27	577	649	252	268	675	672	599	565	572	940	685	671	136	34	340	394	335	648
Ec-01_000380	105	83	41	78	126	76	117	64	163	202	60	986	912	179	679	306	323	246	201	621	471	137	81	336	230	950	1257	238	271	2959	3163	1245	1499	1071	960	53	308	322	420	883	1123
Ec-01_000390	41	26	6	18	17	3	5	8	2	1	2	1631	1464	301	983	24	15	7	34	685	552	14	14	733	705	320	213	482	602	312	454	1108	1784	1031	1446	128	48	268	470	658	1018
Ec-01_000400	54	56	1101	997	686	929	2199	1445	690	630	709	4791	3984	1760	5776	1345	1716	947	823	1104	1163	1582	1219	2562	2149	6537	10157	1587	1537	5353	5822	3999	3348	4044	3649	405	2736	858	718	1146	1083
Ec-01_000410	0	0	0	0	0	0	0	0	0	0	1	4	1	0	2	0	1	0	0	0	0	0	0	1	1	0	0	0	2	0	0	2	1	0	0	0	0	0	1	0	0
Ec-01_000420	302	260	76	125	54	207	240	120	129	228	454	534	939	1528	2708	156	122	2667	2733	1287	1683	213	143	847	316	87	133	417	250	209	189	294	322	816	785	68	69	100	246	72	105
Ec-01_000430	4517	3362	3200	4627	3799	3652	7890	4893	2148	2503	4725	8038	13459	5814	16679	4100	4331	4936	4143	4447	4140	4405	3093	8442	6407	10232	20483	3645	4812	10402	12129	13317	10705	5990	5893	1466	4076	1684	2419	3378	3784
Ec-01_000440	10	5	472	592	371	431	912	720	229	232	220	1045	1035	460	1218	402	364	274	314	524	505	191	144	408	451	1056	1540	376	449	1679	1986	1174	1039	821	1022	202	338	382	591	662	1066
Ec-01_000450	64	54	435	512	371	248	534	469	407	363	351	1917	2085	1469	1839	558	491	420	606	839	838	700	631	1316	1314	718	830	1265	1346	2068	1758	3602	3703	1933	5384	433	476	708	1174	651	692
Ec-01_000460	192	137	524	279	228	518	941	451	1318	1827	787	3227	2977	997	2019	618	896	638	806	1318	1269	420	357	496	497	1705	2925	319	499	1910	2082	3558	3404	1550	1024	201	1863	922	844	732	745
Ec-01_000470	29	28	207	208	138	159	213	150	174	234	158	492	560	284	683	200	133	138	171	214	222	144	115	365	410	427	465	345	453	527	611	597	620	472	558	97	169	135	172	175	180
Ec-01_000480	87	79	129	107	100	68	177	132	47	97	63	140	220	93	184	77	70	56	53	84	70	53	37	123	107	139	231	70	113	215	230	195	208	136	168	29	34	24	51	43	101
Ec-01_000490	14	9	202	326	226	136	306	260	90	135	55	423	423	207	378	168	122	104	129	145	147	139	126	243	265	309	450	288	289	402	457	308	338	317	410	107	95	80	154	102	123
Ec-01_000500	25	14	337	501	345	214	363	391	142	187	122	764	576	269	710	248	291	143	182	288	268	170	126	249	269	694	1001	345	280	1330	1432	494	481	626	571	131	242	239	344	274	351
Ec-01_000510	107	114	481	713	319	735	677	582	2786	1930	1003	16873	21077	13729	20622	1408	1948	1666	4996	3533	4774	3318	2802	13990	21290	4014	3562	26154	21260	16536	14763	15139	15600	13490	29207	4759	2661	5630	9398	4085	5207
Ec-01_000520	125	97	812	880	612	782	1104	819	235	240	235	2779	2927	1300	2939	567	591	461	468	529	567	707	559	1533	1903	1233	2018	1581	1800	2091	2219	2162	2385	1505	2327	208	545	382	355	400	288
Ec-01_000530	10	8	90	126	90	120	87	72	44	62	41	165	260	142	250	73	58	59	67	61	86	70	50	184	215	155	176	220	218	171	214	236	201	175	317	61	26	29	45	31	21
Ec-01_000540	33	21	457	505	339	539	643	430	506	775	516	1733	1510	773	1973	1200	930	915	843	1041	900	336	218	653	573	1745	2236	659	857	1861	2068	1739	1730	1185	1523	598	665	664	954	747	1379
Ec-01_000560	3	3	18	11	21	31	174	33	47	47	62	643	555	271	697	271	186	165	140	418	341	110	103	178	193	665	719	158	188	629	712	627	701	670	494	69	82	190	297	375	609
Ec-01_000570	48	48	617	1032	537	459	838	762	323	378	285	1447	987	508	1420	285	608	284	356	419	464	445	308	374	419	852	1636	608	511	1645	1924	738	798	913	901	126	756	359	620	504	581
Ec-01_000580	915	728	9865	15404	9772	16752	28566	18057	54586	45038	45344	62485	56651	33399	77584	40393	23974	35844	35535	24209	27553	31981	19795	93765	71256	62062	89167	57959	68721	73024	76568	53563	56529	33292	45581	22992	25590	9987	16139	11305	10138
Ec-01_000600	80	69	212	216	153	109	206	180	112	187	172	751	559	303	788	212	313	145	215	275	243	150	111	253	201	369	540	218	269	791	881	508	574	634	588	76	342	145	264	216	423
Ec-01_000620	30	21	1141	410	351	234	601	500	444	365	533	2526	2702	1103	2182	358	1129	399	376	361	462	1460	902	711	351	541	1009	263	785	826	900	2515	3816	1112	5030	56	699	258	350	321	276
Ec-01_000630	23	22	310	379	314	288	337	278	245	371	183	1075	883	468	1256	423	476	314	339	580	507	208	157	443	427	781	1165	362	490	1138	1166	1201	1263	951	1120	238	422	303	470	556	1004
Ec-01_000640	37	17	227	210	138	208	337	263	194	219	154	1344	1261	429	1315	283	547	265	266	414	385	223	163	481	352	571	975	347	410	968	1103	1299	1441	699	917	124	528	191	289	309	353
Ec-01_000650	12	19	14	11	19	85	162	113	54	101	33	1457	1882	267	421	35	15	21	20	440	337	11	10	508	407	102	115	235	320	130	182	951	1608	550	643	52	24	168	279	284	397
Ec-01_000660	6	3	153	148	78	197	309	246	83	137	221	1116	834	346	1182	285	258	247	267	424	411	171	123	407	339	612	707	323	398	775	880	798	897	690	788	181	438	217	291	342	457
Ec-01_000670	53	29	421	458	208	156	321	323	2186	1986	793	2399	1529	1094	2664	1346	1351	618	562	349	389	1483	1114	1067	700	4767	6905	984	816	2532	3088	919	861	2257	1743	394	2092	369	223	340	141
Ec-01_000680	45	36	384	414	198	105	348	350	2281	1987	871	2933	2152	1721	3371	1182	1826	641	669	456	516	1784	1412	802	476	3258	6263	669	535	2404	2871	1327	1175	3218	2495	268	2152	532	319	545	393
Ec-01_000690	3	7	107	220	138	162	327	360	90	152	128	664	626	264	957	165	203	102	112	101	150	244	173	306	420	350	506	313	307	475	502	530	460	501	532	43	149	84	81	107	89
Ec-01_000700	217	190	149	234	157	243	349	189	181	217	167	1593	1494	650	1732	535	395	402	370	577	560	433	363	685	1086	967	1193	949	899	1331	1237	1533	1484	1539	2275	311	286	300	507	300	356
Ec-01_000710	43	39	1214	1823	1097	713	1163	1348	479	851	453	766	621	229	659	330	445	133	201	448	406	104	74	469	350	951	1376	432	730	1215	1658	793	718	621	528	179	727	322	424	663	1062
Ec-01_000720	1	0	9	9	10	10	4	6	4	2	1	212	191	63	117	4	0	3	6	130	63	2	1	137	96	76	46	64	104	39	63	66	118	64	99	22	1	25	66	72	94
Ec-01_000730	9	4	18	36	25	40	101	42	49	73	39	634	586	331	889	197	225	75	86	258	193	196	185	532	650	687	636	540	520	598	621	737	639	982	918	200	357	100	181	268	180
Ec-01_000740	1	1	10	22	11	20	60	20	36	44	27	348	264	107	416	121	143	49	56	207	168	77	44	133	137	466	447	145	171	475	449	433	374	425	346	70	212	99	147	208	314
Ec-01_000750	9901	7720	2318	3191	3420	1721	2152	2088	1574	2068	1167	3059	3510	1675	4327	1612	1480	1594	1687	2988	2456	707	487	1699	1367	2750	3206	1329	1565	3012	3503	4332	4569	2316	4398	1377	964	780	1589	1553	2623
Ec-01_000760	18	24	180	258	153	135	237	251	106	156	190	1046	1051	525	1329	206	195	145	213	311	359	283	222	412	638	714	1171	618	457	1425	1528	1024	952	823	1606	145	191	229	569	266	408
Ec-01_000770	0	3	42	40	25	53	80	40	28	42	54	205	245	112	284	52	37	49	37	79	76	45	24	93	65	70	141	67	73	150	143	262	297	137	312	21	24	38	78	61	107
Ec-01_000780	16	9	256	269	176	298	381	248	220	275	283	924	889	498	1424	485	263	418	371	428	428	290	210	748	785	644	694	725	818	731	726	993	1127	677	1287	285	185	229	464	283	386
Ec-01_000790	62	34	484	469	454	422	686	508	647	811	1680	1213	1208	420	1197	955	685	727	809	640	521	301	189	708	570	874	1144	486	644	1276	1284	932	1008	678	917	281	770	330	618	395	784
Ec-01_000800	58	43	784	1093	778	1071	1835	1330	697	861	894	4196	4596	2769	6013	1646	1635	1241	1174	1272	1402	1599	1280	2651	3069	4568	5717	2356	2495	5111	5270	4195	3836	3635	4250	485	1272	691	956	904	922
Ec-01_000810	225	176	622	727	507	348	529	526	232	299	236	1074	1037	357	1054	263	358	191	245	312	330	403	373	458	534	1220	1518	548	548	1600	1642	796	742	948	1090	127	363	239	344	309	511
Ec-01_000820	273	222	198	308	218	119	202	178	232	253	225	567	590	255	654	261	360	172	171	184	181	247	161	381	324	416	631	395	499	745	812	399	479	414	371	179	360	178	217	173	296
Ec-01_000830	344	290	893	1029	358	495	792	185	4781	5765	7382	9294	8901	7560	17487	8099	8013	8296	7499	6816	6233	8059	5866	3651	2678	18976	27691	2078	3468	19055	20402	6230	6532	14525	23106	2056	7721	4277	4233	3829	5155
Ec-01_000840	128	97	89	153	97	119	166	136	241	253	224	1276	1395	1016	2102	139	160	173	206	677	665	277	231	1115	1158	940	1268	1178	1325	2498	2420	3905	3521	1723	2803	441	764	632	1072	572	763
Ec-01_000850	2144	1659	460	679	705	312	513	453	352	416	1054	1099	1367	649	1327	413	313	595	593	756	779	254	164	727	466	503	636	516	743	1727	1858	1681	1475	1298	1072	258	274	400	582	596	515
Ec-01_000860	9	6	138	246	162	174	363	247	547	785	889	1854	1873	1088	1799	1870	1197	1545	1542	856	813	1010	746	397	460	654	882	490	442	1064	1073	1257	1380	811	1386	251	545	387	625	316	586
Ec-01_000870	18	19	793	1069	627	605	951	860	164	190	214	861	638	307	965	372	211	149	182	199	206	259	191	430	579	760	907	465	463	537	554	720	665	479	473	125	275	135	157	220	227
Ec-01_000890	2096	1484	1893	1240	977	723	762	708	1325	1550	2812	2326	2480	742	1452	1024	363	1202	1152	1799	1641	473	278	1611	1083	1056	1520	1228	2060	1755	2160	7289	9607	646	5519	382	347	504	1499	697	1457
Ec-01_000880	2489	2212	575	412	274	203	225	187	721	581	1114	1727	1800	762	952	485	110	405	351	347	481	441	396	2998	3129	496	409	2921	3492	420	466	4235	4706	405	3951	475	93	130	363	130	184
Ec-01_000900	7	5	5	3	3	5	1	1	0	1	6	170	202	35	41	4	3	5	1	7	7	10	4	475	292	23	21	26	49	10	37	10	25	7	16	2	0	132	142	23	16
Ec-01_000910	2	5	3	3	8	3	4	0	1	0	0	251	291	382	377	8	9	0	3	38	33	8	10	23	20	6	4	2	1	0	21	4	9	4	4	0	0	13	10	2	0
Ec-01_000920	79	59	386	580	298	498	868	742	66	85	137	532	558	169	414	175	182	160	150	215	201	145	130	327	369	1013	1673	171	217	782	852	461	350	295	277	44	144	67	113	84	63
Ec-01_000930	89	55	350	488	266	282	442	321	327	431	358	1051	918	443	1280	371	405	312	328	404	478	294	243	831	612	942	1285	711	808	1772	1969	1025	971	778	1060	261	381	399	548	474	616
Ec-01_000940	2	0	0	1	0	1	0	1	0	0	0	0	0	0	2	0	0	0	0	0	0	0	0	0	0	0	0	0	0	0	0	0	0	0	0	0	0	0	0	0	0
Ec-01_000950	0	0	0	1	0	1	0	0	0	0	0	0	0	1	1	0	0	0	0	0	1	0	0	0	0	0	0	0	0	0	0	0	0	0	0	0	0	0	0	0	0
Ec-01_000960	45	23	388	400	254	173	208	152	168	110	86	1147	683	293	976	185	203	112	154	318	356	187	128	587	623	1370	1818	589	642	1742	1909	1042	881	1476	471	181	1050	277	281	364	319
Ec-01_000970	12	10	178	220	174	192	349	217	173	237	166	660	696	335	881	294	144	276	274	313	310	197	152	331	416	321	524	341	364	417	462	725	718	526	571	114	165	108	197	155	117
Ec-01_000980	272	232	390	320	269	115	243	247	159	199	122	1059	1267	718	1472	449	396	437	400	515	506	371	287	490	578	590	811	686	745	1193	1104	1479	1824	723	1973	148	140	346	651	432	511
Ec-01_000990	24	15	151	179	187	150	282	220	25	67	37	225	280	99	210	118	78	101	66	79	70	63	45	91	106	196	213	90	111	165	211	141	199	123	236	62	38	32	41	35	39
Ec-01_001000	18	21	9	24	18	7	5	7	2	1	3	2234	2970	1455	4930	47	100	15	32	1177	851	40	32	695	613	1206	1182	488	933	3670	3687	2165	4265	4047	5877	93	214	823	1249	3256	4475
Ec-01_001010	11	4	255	518	287	158	272	323	52	90	61	512	302	147	453	103	154	68	86	128	171	141	88	186	233	398	481	364	296	623	636	198	202	328	326	48	186	92	149	99	202
Ec-01_001020	11	6	96	139	79	84	121	101	69	76	43	224	249	109	292	113	109	74	88	116	112	99	75	147	176	213	263	177	225	365	324	248	229	237	263	78	129	79	98	104	128
Ec-01_001030	16	10	97	130	77	162	145	88	68	112	73	193	212	68	239	98	73	61	70	69	96	59	59	126	142	87	145	93	125	148	156	157	149	157	119	39	52	42	42	44	54
Ec-01_001040	649	514	910	1232	835	735	1232	855	2603	3252	1605	4095	2550	981	2469	1122	2064	756	711	913	997	393	236	978	689	2871	5620	1105	920	1970	2194	2153	2568	2283	1962	357	1991	756	940	842	1311
Ec-01_001050	167	139	242	314	135	204	240	140	389	648	229	944	365	259	504	270	302	182	155	137	145	137	129	441	593	258	226	988	470	105	112	296	358	489	381	269	371	98	109	110	71
Ec-01_001060	3	5	102	122	70	71	126	99	71	129	128	398	373	216	514	223	200	155	154	208	212	132	97	323	320	394	478	231	294	623	670	451	408	364	676	111	176	134	233	155	258
Ec-01_001070	9	3	150	316	147	196	378	359	144	167	293	994	1034	451	1282	193	395	183	229	197	307	307	235	908	776	409	647	637	806	1210	1160	1166	1105	585	1398	173	370	245	331	229	373
Ec-01_001080	7	10	76	96	45	98	151	101	107	125	68	635	716	278	669	128	137	116	119	181	187	132	90	328	387	420	562	345	311	712	669	503	507	468	551	120	145	156	203	141	153
Ec-01_001090	35	21	136	127	139	104	163	139	308	310	300	1322	1051	670	1382	383	370	329	422	493	523	342	255	987	939	470	599	1221	1222	1433	1462	1185	1160	957	1735	343	330	632	971	498	472
Ec-01_001100	442	310	878	1284	541	664	819	699	417	541	362	1472	1506	694	1701	447	510	328	424	487	532	564	469	953	1004	1258	1691	858	866	1392	1470	1347	1078	1234	1338	218	554	336	386	442	505
Ec-01_001110	26	30	144	241	128	145	355	235	790	795	599	2047	1740	540	1630	367	306	387	368	747	904	391	297	575	494	1046	1841	455	438	973	1081	1306	1187	1226	868	259	916	221	367	345	388
Ec-01_001120	77	53	103	136	117	120	236	173	276	278	235	1064	1232	644	1226	457	365	388	409	609	592	448	340	424	459	625	968	464	456	1551	1473	1444	1331	1127	1373	204	249	404	798	508	669
Ec-01_001130	0	0	0	0	0	0	0	0	0	0	0	1	0	0	0	0	0	0	0	0	0	0	0	1	0	0	0	0	0	0	0	0	0	1	0	0	0	0	1	1	0
Ec-01_001140	183	176	55	73	39	100	108	60	136	168	72	854	884	294	719	133	116	97	124	201	169	93	70	451	430	323	265	371	512	895	825	541	924	899	1106	109	94	191	224	427	555
Ec-01_001150	506	407	39	72	60	48	33	52	27	48	17	551	182	43	190	98	142	33	47	63	62	59	36	50	44	114	151	37	43	157	201	96	113	178	88	10	32	41	48	63	77
Ec-01_001160	1018	750	283	424	506	221	311	318	429	423	268	1994	2263	1239	2493	643	476	559	637	684	680	552	441	688	818	1242	1549	679	771	1506	1499	1759	1953	2020	2385	290	467	303	467	398	762
Ec-01_001170	3	1	159	181	128	173	378	281	103	129	138	362	312	143	461	322	198	184	169	204	197	120	68	171	169	541	801	155	152	536	519	318	381	325	317	80	112	77	119	180	191
Ec-01_001180	49	54	253	283	241	285	344	243	327	430	239	712	865	538	1057	288	190	295	323	355	350	242	206	576	553	625	798	467	495	785	859	1096	1022	588	1138	223	172	134	223	147	218
Ec-01_001190	17	11	155	168	104	115	172	102	89	104	70	517	530	165	370	108	92	65	89	146	134	139	90	323	338	194	266	260	454	328	310	390	640	276	989	17	85	115	171	116	132
Ec-01_001200	5	4	83	126	83	40	66	69	38	53	43	88	60	17	59	10	23	9	7	7	19	23	21	51	78	50	32	60	86	27	27	37	38	48	50	9	38	8	7	11	8
Ec-01_001210	359	287	1481	1041	825	662	888	882	1324	1291	3289	2665	3032	1597	2911	712	1148	1517	1608	2639	2294	537	317	787	690	3466	5053	930	911	8212	8330	3002	3567	2694	4995	573	2025	1657	2634	2140	3742
Ec-01_001220	35	44	753	984	520	634	920	734	338	345	198	1065	1117	452	984	341	189	156	203	239	290	318	258	1202	1304	794	953	1002	1451	801	850	1071	1088	705	1028	197	274	144	277	297	309
Ec-01_001230	35	30	296	416	222	207	334	330	279	396	314	1069	1316	772	1416	476	398	545	482	314	321	611	425	748	519	642	775	447	833	669	785	1113	1164	534	1389	158	136	150	299	241	277
Ec-01_001240	47	34	107	98	113	51	45	105	448	495	459	406	426	450	627	247	186	234	383	140	161	237	177	802	640	96	72	794	855	508	355	238	410	446	1350	99	21	261	643	243	331
Ec-01_001250	35	22	204	169	164	168	318	227	191	329	193	585	583	338	752	262	91	138	225	316	303	113	88	428	419	748	826	431	468	794	879	833	957	550	937	222	153	139	314	318	480
Ec-01_001260	9	9	0	3	4	0	0	0	1	1	2	812	1062	572	1383	14	11	3	11	305	192	9	18	244	252	353	308	185	267	921	993	623	1171	1162	2231	29	30	228	287	538	858
Ec-01_001270	6	3	25	23	10	42	74	54	167	152	105	375	307	141	354	198	159	156	214	286	277	129	97	172	235	212	320	182	147	381	339	345	431	346	521	156	137	155	297	269	432
Ec-01_001290	75	57	187	243	161	108	91	95	777	858	365	413	524	257	449	23	20	97	184	121	143	72	54	61	48	9	15	11	38	18	26	590	566	301	506	178	851	14	18	10	9
Ec-01_001300	48	40	75	101	73	127	109	65	253	356	223	197	147	87	213	0	0	176	140	154	125	27	15	0	0	0	1	0	0	0	0	306	461	116	336	182	109	0	0	0	0
Ec-01_001310	2	6	0	2	2	3	4	3	0	0	1	5	5	0	0	0	0	0	1	0	1	0	0	0	0	0	0	0	0	0	0	1	2	1	2	0	0	0	0	0	0
Ec-01_001320	0	0	0	0	0	0	0	0	0	0	0	2	0	0	0	8	8	0	0	0	0	1	1	50	46	1	5	13	16	19	11	0	0	0	0	0	0	1	2	2	2
Ec-01_001330	51	46	182	192	129	320	190	124	277	164	164	706	864	552	792	170	119	153	222	101	165	185	157	709	971	359	286	911	819	327	333	413	413	330	538	221	95	104	235	130	130
Ec-01_001340	188	135	588	604	558	601	819	683	812	711	727	4315	5148	2683	4644	1030	779	966	1517	967	1097	787	561	1258	1464	1275	1564	1563	1397	2053	2010	2815	2951	1805	3179	672	587	813	1451	750	1339
Ec-01_001350	5246	3767	7491	9863	6612	8130	17661	10873	4403	3440	17891	35756	27758	12773	78321	18817	40783	15910	10418	21782	18258	21011	12068	19317	9281	103291	211077	6407	7687	96637	116986	43843	36096	40746	22356	6735	58920	13072	9258	20216	16152
Ec-01_001360	20	23	112	134	94	183	148	134	84	91	89	186	250	220	335	130	64	126	135	140	150	175	156	679	768	315	286	592	660	338	343	305	279	260	498	222	89	67	141	103	45
Ec-01_001370	44	34	174	187	191	280	378	266	379	403	420	1489	1563	802	1823	730	313	615	602	909	889	612	403	1309	1111	1264	1547	1035	1164	2133	1944	2235	2264	1266	2751	371	439	312	618	347	675
Ec-01_001380	0	0	0	3	5	4	2	3	0	3	4	3	1	5	3	0	2	2	0	0	0	0	3	1	2	2	0	0	1	2	2	2	3	1	3	0	0	0	1	1	0
Ec-01_001390	0	0	3	2	1	6	0	2	0	2	2	4	2	4	0	0	0	0	1	1	1	1	0	2	0	0	1	1	0	0	0	2	4	1	5	0	0	1	1	0	0
Ec-01_001400	1	1	1	2	1	1	1	0	0	0	4	1	1	2	3	2	0	0	1	1	2	1	0	1	0	3	1	0	2	1	0	7	0	2	0	0	2	0	0	0	0
Ec-01_001410	85	64	289	291	326	272	418	379	308	335	180	1179	865	366	981	508	485	270	318	481	520	239	145	780	621	766	930	843	955	1424	1229	1194	1200	936	914	304	1122	423	468	613	1160
Ec-01_001420	7	4	3	4	2	15	6	9	3	5	2	622	725	67	122	2	0	3	1	166	98	1	1	30	15	15	23	12	23	41	63	295	647	190	166	1	3	63	65	131	146
Ec-01_001430	6	12	17	18	17	22	21	26	4	11	3	545	458	40	135	13	3	1	5	162	104	5	4	141	155	31	26	88	112	52	59	299	497	197	169	25	7	88	98	135	208
Ec-01_001440	315	220	256	421	295	411	558	393	483	509	455	773	594	295	760	448	389	364	425	422	485	319	235	628	569	568	702	696	750	1045	983	671	745	515	903	266	355	316	518	317	454
Ec-01_001450	937	841	8899	9342	6684	6216	20163	15460	4187	4101	14598	46197	46676	19431	76661	15787	24736	18060	13158	20838	18364	19078	13076	20963	14702	78997	192844	7722	9356	101419	121082	58294	46337	40808	28871	3658	28467	9755	12624	15781	10280
Ec-01_001460	170	147	1088	1267	1291	1148	2475	1022	692	1377	1080	1788	1882	718	1779	978	828	700	654	1070	922	248	160	980	679	1821	2540	674	948	2267	2619	2314	2350	1438	1636	446	935	713	1168	1083	2320
Ec-01_001470	25	32	928	1251	843	496	1075	971	457	669	372	773	451	216	738	361	648	268	296	445	405	182	113	254	213	693	977	467	378	839	1016	483	435	490	420	203	867	299	442	482	822
Ec-01_001480	505	462	183	306	461	301	391	344	547	760	827	993	1067	609	1625	1040	190	693	708	577	553	224	150	613	468	461	541	424	493	449	565	1001	1126	813	1091	314	246	183	318	216	385
Ec-01_001490	125	95	224	203	176	133	152	177	87	113	258	423	415	358	781	169	200	275	252	425	345	164	97	455	361	727	878	253	325	1238	1231	401	532	409	609	106	135	213	349	204	303
Ec-01_001500	173	183	344	281	219	186	180	200	133	111	240	393	381	493	703	104	140	179	152	211	253	216	209	1338	1120	418	332	1111	1175	418	412	292	362	402	666	223	90	85	132	88	40
Ec-01_001510	24	23	165	262	158	172	247	178	252	310	158	487	504	254	758	221	112	176	207	235	275	174	117	471	568	401	468	526	436	361	405	717	601	537	729	207	144	76	138	71	166
Ec-01_001520	4	7	17	42	32	27	41	35	53	57	52	201	281	321	509	65	78	98	97	84	95	95	92	297	427	154	180	339	327	613	601	423	405	396	1135	57	44	85	214	111	146
Ec-01_001530	5	6	5	15	10	1	17	0	4	9	3	14388	10223	5428	10680	747	634	58	67	478	2076	623	378	6627	9951	3377	1225	10452	9555	6853	7715	1758	4071	2998	247	273	60	4675	4769	2391	2284
Ec-01_001540	7	3	63	80	52	62	60	83	96	123	55	353	303	169	292	137	164	126	139	155	175	102	80	141	167	238	249	210	169	337	404	301	276	239	387	101	192	153	265	105	249
Ec-01_001550	1277	1095	1130	1209	859	889	848	549	746	1305	555	2444	2545	1288	2808	954	645	799	680	1364	1180	309	225	1009	804	1982	1984	690	999	2436	2866	3994	3972	2204	2175	861	1649	792	1043	825	1452
Ec-01_001560	50	40	559	571	416	670	1416	936	513	575	820	2781	2752	1319	3627	1200	1068	1290	1110	1287	1281	1090	750	1293	1399	1794	2720	1153	1294	2821	3087	3184	3468	1953	2304	473	889	624	959	848	838
Ec-01_001570	35	41	156	175	159	185	189	172	171	163	64	999	1227	586	1243	132	177	130	153	440	364	134	114	870	879	299	371	762	823	464	529	1852	2019	640	2109	429	296	230	527	201	304
Ec-01_001580	2	0	0	0	0	0	0	0	1	7	1	12	7	12	11	2	6	1	0	3	2	9	1	16	47	9	6	25	31	16	9	14	13	19	22	6	1	5	4	1	0
Ec-01_001590	0	0	2	3	1	3	1	2	0	0	0	2	5	14	18	9	3	10	6	16	20	2	0	5	7	4	0	9	11	0	21	0	0	0	0	12	10	1	1	0	1
Ec-01_001600	172	138	456	795	613	466	605	560	659	710	2122	1146	796	267	1184	780	785	390	452	504	486	269	196	385	318	1083	1695	271	482	1608	2110	1039	807	970	381	140	970	415	435	582	765
Ec-01_001610	21	20	288	353	284	255	683	622	367	281	440	2923	4551	2019	3530	445	604	604	678	632	771	610	419	1137	1586	743	768	1666	1565	2215	1912	2708	3216	1073	4915	175	382	690	1500	569	1042
Ec-01_001620	62	32	399	392	314	217	378	292	160	264	194	577	641	194	538	342	248	307	297	824	757	155	103	406	206	860	1453	134	288	902	1113	840	797	570	556	240	393	213	396	327	340
Ec-01_001630	109	70	1371	1623	790	567	437	470	348	387	475	2495	1425	437	2191	450	1103	188	265	698	635	305	193	981	649	2072	3644	594	956	3366	3701	2046	1854	2305	1446	207	3279	541	670	1110	1295
Ec-01_001640	71	57	736	873	390	298	250	228	282	218	200	1187	753	265	1080	219	385	81	123	166	244	340	305	970	1125	727	670	990	1017	574	583	725	609	1085	741	225	1605	268	277	479	413
Ec-01_001650	48	43	176	238	269	135	169	152	237	380	215	513	584	306	676	254	101	204	166	287	237	157	109	496	459	437	460	432	553	480	454	649	798	509	1213	189	148	146	251	266	289
Ec-01_001660	46	35	4210	4023	2953	4985	5370	4095	5566	11314	6385	4500	4307	1950	4941	8679	5390	6519	6129	6394	5235	1029	623	4248	2989	6997	8379	3236	5095	6464	6885	5250	5356	3058	3784	3788	3858	3254	6154	4411	13335
Ec-01_001670	0	0	0	0	0	0	0	0	0	0	0	0	0	0	0	0	0	0	0	0	0	0	0	0	0	0	0	0	0	0	0	0	0	0	0	0	0	0	0	0	0
Ec-01_001680	131	94	205	185	157	116	87	116	781	830	662	976	1000	510	1153	420	536	418	736	553	536	579	423	663	560	375	368	551	887	541	568	685	1136	818	1136	137	381	453	380	347	489
Ec-01_001690	4	1	5	13	9	26	29	16	16	58	28	154	139	78	253	44	31	28	41	118	106	32	25	133	163	110	110	119	121	201	150	176	172	185	236	37	80	48	45	70	78
Ec-01_001700	20	17	106	150	131	59	199	208	34	50	126	464	493	343	700	97	81	116	174	155	161	140	109	177	190	413	677	213	178	666	737	365	662	350	2001	44	44	131	296	135	205
Ec-01_001710	30	17	234	267	229	115	178	182	128	207	149	394	270	163	433	214	258	157	159	257	249	88	69	183	184	306	487	188	214	599	614	367	402	361	347	144	226	176	231	221	377
Ec-01_001720	142	129	205	370	206	170	342	304	118	152	151	922	757	324	981	342	371	258	239	325	316	212	195	341	364	508	900	361	274	959	1027	627	532	719	669	131	426	221	267	235	288
Ec-01_001730	12	11	75	111	73	100	118	119	41	47	36	218	234	92	277	80	50	51	60	67	71	70	56	172	216	137	188	160	134	129	128	153	144	151	127	39	60	19	34	40	37
Ec-01_001740	137	110	379	440	277	373	615	402	280	492	377	1586	2108	1022	1571	703	177	777	797	803	805	431	332	954	1249	574	651	1005	1224	632	620	1781	2091	818	2100	211	84	195	498	237	454
Ec-01_001750	214	181	734	981	670	348	680	625	223	315	295	1477	1211	695	1738	576	405	390	422	510	446	491	391	1019	1098	1194	1694	965	1080	1745	1918	1329	1304	1022	1815	296	397	442	836	604	736
Ec-01_001760	1	5	4	3	7	8	11	12	16	17	24	99	90	69	131	65	22	38	33	18	23	25	23	74	72	35	35	62	52	20	30	33	30	48	55	11	6	7	4	7	8
Ec-01_001770	0	0	23	15	8	7	26	34	5	8	4	169	114	23	117	5	17	7	4	10	8	12	5	35	26	27	41	16	29	45	52	137	78	61	26	5	16	12	24	27	24
Ec-01_001780	0	0	152	79	53	74	137	147	9	7	40	228	155	35	187	25	61	18	18	32	34	18	13	119	83	124	144	76	93	140	245	195	107	101	57	7	37	49	88	84	130
Ec-01_001790	0	0	0	0	0	0	0	0	0	0	0	0	0	0	0	0	0	0	0	1	2	0	0	0	0	0	0	0	0	0	0	0	0	0	0	0	0	0	0	0	0
Ec-01_001800	3	4	1	0	1	7	11	1	15	16	53	408	417	943	1330	8	12	207	229	94	140	39	52	258	171	142	56	189	239	80	105	432	259	131	250	149	70	35	88	28	24
Ec-01_001810	0	0	1	0	1	2	6	0	0	0	2	15	9	11	22	0	0	2	0	2	5	1	0	2	7	5	4	6	8	9	6	9	9	5	16	6	1	3	1	1	2
Ec-01_001820	0	0	2	0	0	7	9	0	0	0	0	0	0	0	0	1	0	5	2	5	19	0	0	0	0	0	0	0	0	0	0	0	1	0	0	16	6	3	6	4	2
Ec-01_001830	1	1	4	2	1	13	10	7	14	7	22	89	157	72	133	23	31	46	44	32	40	26	12	49	63	18	38	73	42	52	40	87	93	48	58	11	5	12	7	14	10
Ec-01_001840	6	3	16	11	24	50	48	69	17	35	31	109	163	123	198	51	24	52	66	83	87	31	22	212	219	33	64	175	212	74	85	192	200	90	186	23	20	48	53	71	57
Ec-01_001850	23	17	33	58	27	234	301	75	710	660	445	1013	1427	1166	2013	387	82	818	1098	397	538	186	159	860	734	239	106	694	807	87	92	457	445	231	517	155	73	93	168	60	91
Ec-01_001860	8	13	350	424	285	399	417	331	212	217	135	804	608	273	668	271	198	165	207	189	200	151	124	382	441	629	928	292	406	600	725	680	478	481	331	104	522	105	167	152	134
Ec-01_001870	158	139	3751	6145	3737	4165	10670	9044	879	944	2625	19165	19647	7979	22072	3487	3636	4211	3597	4716	4835	5036	3899	7329	8805	12541	22070	6843	6403	14172	17163	18280	16040	10692	9844	1435	3727	2242	3665	3393	3632
Ec-01_001880	26	23	271	303	206	176	351	280	231	233	308	501	388	168	530	221	188	205	272	374	371	154	119	256	197	650	927	190	206	712	796	468	521	471	429	82	434	187	231	262	276
Ec-01_001890	3	5	378	893	397	209	583	668	74	158	90	399	288	171	488	168	242	90	121	138	153	300	244	121	127	686	921	238	122	647	726	213	159	333	269	46	295	117	101	146	110
Ec-01_001900	4	0	105	88	53	57	105	108	99	187	152	462	433	145	360	82	243	103	145	241	159	87	43	48	33	197	442	49	50	380	471	401	417	307	401	36	151	162	235	190	206
Ec-01_001910	5	6	311	330	261	211	400	338	313	463	426	817	769	327	756	489	599	382	341	454	393	212	142	291	355	751	1120	343	352	1064	1179	630	677	495	690	210	517	254	413	294	336
Ec-01_001920	160	136	562	580	356	270	317	332	466	577	448	371	418	302	637	452	313	499	477	365	334	253	170	497	467	463	414	490	645	613	584	575	630	282	678	255	129	203	351	263	703
Ec-01_001930	205	160	71	93	71	51	61	62	30	52	37	41	44	22	52	78	41	70	97	99	108	94	51	81	61	33	37	45	64	29	34	37	59	24	44	43	31	71	123	92	132
Ec-01_001940	262	206	1819	1746	705	373	460	302	3410	4875	4136	4249	2785	2454	5138	3730	4395	3639	4401	1966	1943	4831	3321	1013	1037	1217	1062	1108	1286	2997	2772	1545	2426	3400	7012	671	2092	1988	1681	1440	1773
Ec-01_001950	3	4	16	17	15	84	120	60	201	352	146	580	625	279	813	283	261	263	284	270	327	233	181	232	284	670	1096	250	234	918	927	485	507	491	606	81	207	94	144	108	92
Ec-01_001960	189	210	4	9	26	5	12	11	1	0	6	559	564	221	626	4	6	3	3	122	98	20	9	98	118	196	137	88	125	474	535	246	521	657	1068	15	16	61	74	157	133
Ec-01_001970	299	219	2843	4454	2688	1948	4959	5316	1187	1306	3448	16678	16516	8149	25755	4584	7422	3802	3309	4111	4035	6512	5058	7653	7970	14796	25033	5853	6838	22026	25381	13519	11943	13737	15627	1370	4427	3095	4016	4103	4529
Ec-01_001990	21	17	491	490	308	262	555	563	204	202	208	959	718	304	939	173	358	141	166	188	221	282	245	554	460	686	965	345	421	994	1038	590	684	483	1512	78	688	214	211	176	195
Ec-01_001980	125	90	1336	2283	1044	1817	1925	1839	545	572	1141	5303	5082	3197	7129	1476	1635	931	884	758	834	2260	2082	4479	5545	2874	2890	4666	4437	2262	2621	3594	3022	3936	5186	719	1165	569	755	818	551
Ec-01_002000	13	7	16	6	7	14	17	15	10	28	11	447	428	66	120	8	3	8	10	82	57	4	6	159	139	23	21	68	92	36	40	219	313	120	141	28	4	47	61	62	68
Ec-01_002020	4	7	333	420	261	411	790	616	305	367	279	1115	1158	559	1220	356	299	313	288	517	522	234	153	446	510	744	1292	481	419	1019	1132	1211	966	879	676	212	351	279	447	375	420
Ec-01_002030	710	511	480	511	432	233	338	366	221	375	248	655	666	285	776	163	338	232	360	485	464	110	68	109	100	357	631	88	125	918	1011	708	723	566	855	94	368	281	340	309	449
Ec-01_002040	8	7	223	227	160	164	258	282	251	289	192	399	439	132	380	207	85	193	264	310	299	82	65	345	307	217	369	322	353	338	322	472	466	303	345	78	58	115	263	152	179
Ec-01_002050	186	116	574	538	327	474	680	356	696	904	440	2435	2738	208	509	992	26	1405	1333	1010	1062	68	47	927	1046	425	486	769	952	151	162	2213	2206	449	740	371	45	112	625	178	478
Ec-01_002060	3	2	47	36	49	47	92	47	51	72	26	142	118	64	661	65	20	23	17	172	117	33	16	151	128	266	306	137	225	257	318	210	292	258	284	49	87	98	151	231	456
Ec-01_002070	42	41	757	815	574	458	948	984	272	295	389	1191	1202	544	1444	599	534	442	414	468	482	526	336	792	784	1483	2543	679	870	1761	1925	1132	1113	888	1254	206	624	338	461	403	673
Ec-01_002080	427	342	344	556	303	285	372	308	147	207	82	453	494	222	449	315	167	146	164	152	138	205	158	325	371	412	521	313	380	525	572	291	345	266	451	74	95	89	138	128	128
Ec-01_002090	105	77	685	775	488	466	1264	868	917	1137	1026	1710	1897	745	1550	1528	417	1757	1545	1149	1086	567	375	1657	1729	1151	1759	1339	1691	801	913	1789	1789	727	939	407	262	265	656	417	597
Ec-01_002100	80	74	194	174	111	97	117	92	64	97	49	209	338	174	420	109	35	136	109	110	102	140	135	238	276	100	111	183	226	126	112	395	649	131	845	48	11	60	139	99	139
Ec-01_002110	41	41	1007	1249	914	561	1009	1177	660	1179	705	1697	1309	575	2027	632	769	482	580	1159	1066	343	269	788	706	2640	3310	817	922	3622	3768	1996	1971	2042	2112	630	1217	547	864	1091	1679
Ec-01_002120	2	3	25	19	13	32	24	23	18	39	23	85	102	31	90	28	16	26	15	23	27	33	13	108	113	81	57	39	74	48	46	108	100	73	82	31	33	13	19	4	8
Ec-01_002130	73	65	15	29	42	104	274	45	1158	1122	950	2973	2748	2679	5039	1414	1111	1370	1053	1320	1192	1772	1292	5896	5631	2409	2755	4271	4493	2227	2134	3206	3394	3095	3945	1366	1704	685	828	717	399
Ec-01_002150	146	93	177	182	167	179	324	308	58	76	178	1736	1868	759	2144	309	286	348	254	393	289	175	135	936	950	930	1234	748	679	1684	1689	3025	3182	1508	1785	173	643	503	397	470	515
Ec-01_002160	0	0	1	2	3	4	6	4	2	4	3	12	9	9	14	2	0	1	1	1	0	2	0	10	6	9	5	9	7	6	4	9	10	11	12	1	3	0	0	1	3
Ec-01_002170	4	2	106	98	64	92	181	147	59	67	52	400	421	217	510	121	99	139	139	201	213	97	72	113	155	238	362	103	119	420	512	427	432	334	504	54	83	100	149	163	131
Ec-01_002180	4	2	127	125	80	90	219	181	73	87	32	504	444	124	423	130	128	63	85	124	125	54	42	138	168	229	242	155	136	317	291	352	367	340	230	63	235	61	74	79	84
Ec-01_002190	33	29	319	404	268	290	434	352	296	378	372	1360	1267	872	1708	461	444	542	537	634	728	434	324	861	832	844	1052	824	1031	2152	1918	1340	1287	1077	2212	413	244	474	930	470	970
Ec-01_002200	59	39	239	254	180	291	370	403	182	199	126	469	559	341	935	24	32	850	745	660	683	98	65	116	79	71	78	125	139	220	198	596	543	556	454	55	163	249	505	269	417
Ec-01_002210	490	441	871	661	513	913	1839	884	260	240	2332	129	777	253	324	37	24	135	180	501	578	65	51	3628	1695	691	1287	881	1066	356	410	1370	1273	215	378	181	44	85	212	106	140
Ec-01_002220	23	19	289	280	263	248	373	268	180	194	130	698	784	369	914	227	139	153	166	224	258	242	197	530	569	606	728	601	652	858	839	916	853	761	775	120	199	193	291	161	128
Ec-01_002230	42	34	1181	1315	2210	1330	1513	1127	1305	814	441	1476	2372	507	1166	285	135	274	851	246	444	152	119	982	1241	552	507	1209	1032	540	571	910	823	450	631	191	157	181	274	123	135
Ec-01_002240	7	0	29	26	161	60	63	37	21	38	30	371	388	132	459	61	52	34	29	191	124	66	70	198	194	335	239	169	226	593	581	308	441	402	916	94	23	110	269	246	292
Ec-01_002250	29	24	245	335	194	480	726	531	145	214	285	1043	1041	363	1184	393	348	376	298	579	541	373	327	1188	1166	1454	2230	825	1014	1667	1845	1376	1117	965	905	191	477	257	484	380	304
Ec-01_002260	78	90	474	330	147	286	484	244	414	640	753	1740	1407	691	1733	1362	667	1512	1213	954	950	741	526	1102	1003	1567	1812	843	899	1467	1678	1595	1281	1204	1219	310	535	299	410	275	338
Ec-01_002270	2801	2331	631	731	436	331	307	290	199	335	648	1663	1521	1009	2017	1378	371	1200	950	1106	1138	543	446	1576	1724	1484	1113	1141	1298	1413	1333	2228	2403	1472	3969	675	295	385	755	419	447
Ec-01_002280	17	11	198	238	190	258	382	257	417	635	477	1233	1127	562	1677	894	616	643	645	639	685	399	292	935	970	1676	1833	904	938	1429	1649	1225	1218	933	1370	589	495	377	578	537	884
Ec-01_002290	206	166	531	546	328	591	753	410	334	500	313	2642	3031	1651	2617	866	371	1034	1033	1226	1370	775	600	1482	2424	2083	2573	2087	1842	2680	2601	3150	2943	2282	3339	434	488	577	850	589	349
Ec-01_002300	114	100	2199	2802	1823	1119	3028	3187	624	821	1535	7184	6873	3309	9715	2062	3102	1506	1478	1726	1799	2794	2189	1983	2340	3573	6338	2019	1945	5041	5701	5156	5077	4880	5651	445	1510	1216	1648	1481	1366
Ec-01_002310	10	4	250	171	157	195	328	206	206	426	284	766	743	332	1015	386	348	212	250	606	477	150	91	253	271	1048	1409	224	302	1188	1549	1271	1524	890	1604	209	322	353	544	773	1335
Ec-01_002320	27	32	294	254	197	104	267	185	188	169	104	108	115	44	134	168	134	109	110	179	133	55	28	71	55	158	228	60	66	141	152	154	141	118	119	38	184	53	98	102	135
Ec-01_002330	59	56	277	314	214	578	820	468	392	410	439	2792	2991	1448	3519	643	661	577	592	800	878	1014	757	1258	1272	1519	2257	1065	1070	1445	1521	2303	2171	2484	2910	201	793	506	606	509	309
Ec-01_002340	2280	1686	234	378	421	233	252	185	1242	1211	485	156	376	11	39	276	203	125	76	250	182	35	18	80	88	72	177	55	49	40	98	58	76	219	34	42	550	18	13	57	57
Ec-01_002350	85	82	221	517	276	236	390	449	88	128	82	738	440	175	520	117	240	76	82	135	143	120	92	309	312	420	592	376	319	613	769	331	333	434	243	64	242	127	140	131	113
Ec-01_002360	11	6	105	260	131	157	135	182	1	0	0	408	541	98	282	57	64	13	40	191	150	6	10	221	166	146	104	119	154	137	186	278	331	180	381	62	83	57	97	111	106
Ec-01_002370	12	19	191	282	151	353	572	476	284	396	289	1361	1471	652	1482	495	284	520	631	750	851	391	307	550	755	921	1301	671	494	912	975	1765	1559	1023	1320	236	274	169	418	266	301
Ec-01_002380	216	169	181	215	174	182	285	148	407	358	622	1676	1456	1088	4244	999	1987	489	399	581	501	1116	751	1990	1305	3722	7124	956	1217	5727	6301	1831	1760	2970	3247	477	3029	826	463	967	884
Ec-01_002390	54	37	691	789	416	434	718	541	359	566	468	826	564	257	849	642	602	498	470	706	580	247	154	632	487	1507	2143	588	576	2049	2586	892	855	635	911	470	595	224	396	434	473
Ec-01_002400	41	41	278	348	212	268	396	277	102	206	134	701	646	224	682	183	285	166	202	399	333	129	68	165	115	826	1741	149	171	1751	2230	964	871	613	900	102	200	252	369	372	413
Ec-01_002410	47	32	518	692	445	486	976	821	311	476	481	1136	989	408	1321	663	465	662	486	788	706	239	152	502	404	852	1641	373	399	980	1090	1313	1032	734	558	375	487	250	410	378	633
Ec-01_002420	1428	1052	744	1149	891	576	476	530	720	1071	1076	1387	1477	807	1662	1111	495	1191	1401	1307	1140	313	211	703	636	890	955	659	914	1392	1522	2012	2532	1194	2456	415	437	801	1079	991	1240
Ec-01_002430	216	187	31	30	26	18	58	26	99	184	384	386	689	4273	7538	51	23	11810	10946	6046	7213	55	35	995	231	75	106	366	264	611	646	361	393	3228	2425	34	53	162	342	209	235
Ec-01_002440	88	84	179	198	120	109	250	189	1271	1556	272	465	298	197	425	483	393	372	375	268	251	168	137	258	195	807	1393	232	140	349	407	227	239	374	275	110	320	100	143	107	157
Ec-01_002445	76	56	154	149	57	153	180	132	830	1213	185	174	128	92	186	242	135	174	160	96	91	79	71	212	174	490	567	237	84	147	154	86	87	150	120	95	147	33	44	48	71
Ec-01_002450	330	269	389	375	267	427	448	368	506	450	619	1567	1566	1673	2369	556	752	560	709	681	718	809	631	2157	1929	960	1275	2173	2012	2862	2602	1945	1775	1512	4000	356	302	752	1749	820	1168
Ec-01_002460	98	81	1761	2330	1545	1242	2980	3094	743	1007	1605	5805	5521	2219	6540	1557	2025	1297	1213	1887	1694	1802	1176	2129	2369	4497	7014	1817	1990	5235	6345	4916	4764	3566	3812	662	1291	1229	2101	1745	2502
Ec-01_002470	12084	9832	956	2112	1845	1190	1058	816	153	247	176	3190	4384	2142	4416	232	172	129	131	1898	1686	161	130	2211	2283	3566	5434	1239	1677	3762	4558	5828	6535	2521	4214	320	680	755	1261	1048	747
Ec-01_002480	21	22	4	11	8	2	0	4	0	1	0	2	1	0	8	0	1	1	0	3	1	0	0	21	4	5	1	3	8	0	0	2	1	0	3	2	0	0	1	0	0
Ec-01_002490	3	3	0	5	2	2	1	1	0	0	0	8	18	57	68	0	0	0	1	1	4	1	0	4	8	4	4	5	5	3	5	8	6	5	7	2	1	1	2	1	2
Ec-01_002500	2	6	105	64	60	31	38	40	220	328	287	1630	1994	813	1215	1798	1125	1286	949	92	138	556	462	192	211	115	68	119	175	60	75	127	104	58	152	92	16	28	42	31	28
Ec-01_002510	2	2	16	23	12	7	12	8	8	22	12	22	21	11	22	21	7	13	11	2	5	6	2	5	13	5	1	11	1	2	2	9	13	10	16	3	0	2	1	1	1
Ec-01_002520	158	113	1600	2289	1420	1061	1647	1709	337	425	495	1668	1498	772	2068	467	544	345	432	653	642	712	482	1184	1275	1511	2530	1086	1096	1805	2102	1845	1520	1431	1960	264	493	501	825	607	765
Ec-01_002530	359	304	843	1040	767	489	1098	494	437	637	1058	4513	4620	2063	6045	865	1185	696	760	1648	1543	1870	1565	1404	1869	4151	5756	1413	1459	5586	6738	4917	5179	6214	8243	278	1430	1263	1834	1922	1807
Ec-01_002540	172	116	1496	1819	1204	1542	5063	3354	1749	1772	5619	14234	13898	7493	19400	5011	4846	4474	3873	5011	4864	5609	3806	10676	9501	17200	27585	6734	8044	21913	23081	12884	13458	9104	11770	1960	4683	2894	4159	4378	3327
Ec-01_002550	6163	5189	6013	4351	3568	2412	4523	4269	1477	1677	2067	7111	11425	4002	7395	2507	1787	3586	2763	1960	2113	3253	2546	2639	2803	6719	9117	2064	2779	7050	7747	9145	8742	3795	8687	398	2506	903	1197	904	1709
Ec-01_002570	75	52	303	333	243	153	301	253	258	227	347	350	407	161	426	217	179	149	147	192	205	93	56	290	241	361	502	269	434	621	611	448	486	266	412	73	322	141	242	210	436
Ec-01_002580	15	15	338	418	289	424	853	590	349	550	681	2084	2199	1180	2813	414	668	545	617	875	799	584	400	330	292	1298	2766	302	284	2490	2872	2438	2337	1554	2631	169	704	737	1115	675	1173
Ec-01_002590	0	0	0	0	0	3	0	0	0	0	0	0	0	0	0	0	0	0	0	0	0	0	0	0	0	0	0	0	0	0	0	0	0	0	0	0	0	0	0	0	0
Ec-01_002600	1818	1426	826	1370	1039	723	594	489	810	1269	845	394	447	65	326	1814	71	1986	1495	2047	1609	57	25	369	270	758	1362	267	450	418	624	577	848	372	888	497	53	144	746	357	1011
Ec-01_002610	46	22	699	532	485	425	619	514	724	970	633	830	813	418	980	774	609	537	578	513	521	198	136	781	499	1049	1115	527	936	1328	1341	933	943	488	849	579	685	330	507	408	806
Ec-01_002620	3	7	1	4	3	3	1	2	0	1	0	289	322	30	62	4	0	3	3	97	61	4	4	136	114	50	39	53	96	42	41	162	298	103	140	15	2	23	40	44	113
Ec-01_002630	26	21	7	4	2	6	7	1	0	0	2	767	846	140	375	9	4	0	3	259	212	7	8	277	279	107	131	160	195	140	212	425	714	344	592	26	14	76	109	178	279
Ec-01_002640	78	56	38	79	48	35	35	57	39	27	18	164	93	58	329	11	9	23	25	571	420	2	4	2610	2935	522	739	2890	3875	1866	1932	3486	4793	1344	6428	741	315	561	759	312	296
Ec-01_002650	294	241	1577	764	806	807	1840	1048	1559	1891	1773	3100	4454	2127	3777	1085	1604	1276	1755	1327	1412	1010	691	1585	1245	1334	2144	1113	1659	3016	2663	3974	4566	2202	5171	388	538	1223	2387	1360	2719
Ec-01_002660	27	18	123	168	97	207	224	149	209	316	169	596	670	317	693	331	225	226	248	207	242	255	209	585	638	455	465	573	635	525	542	584	582	323	739	153	103	99	162	114	133
Ec-01_002670	145	133	385	362	203	209	365	302	1927	2379	816	2519	1723	776	1141	1418	1470	1271	1223	691	671	1433	1285	555	508	1929	2999	812	476	949	930	796	660	1880	1462	207	949	327	312	210	196
Ec-01_002680	212	182	964	1044	680	441	839	721	634	661	844	1285	1376	649	1422	529	606	476	538	756	807	329	255	983	500	1465	1961	538	892	1886	1947	1886	1839	1012	1658	236	943	483	746	614	841
Ec-01_002690	409	284	498	563	386	353	650	478	388	416	977	2231	2409	1071	2442	579	669	569	586	690	826	808	581	1261	1241	1007	1501	1261	1143	1147	1087	2350	2438	1413	1943	198	869	365	611	354	400
Ec-01_002700	341	308	304	462	279	233	438	310	154	153	243	934	916	326	1175	429	405	358	317	295	375	332	232	482	408	1069	2058	346	437	1859	2127	917	820	753	848	109	368	142	158	162	215
Ec-01_002710	6	6	112	142	88	70	186	161	184	216	204	1501	1487	682	1455	475	496	338	347	461	482	419	353	407	359	1231	1791	445	323	1345	1492	1074	877	945	881	169	445	241	343	257	299
Ec-01_002720	84	81	1056	489	575	657	1340	553	1446	1085	906	5620	5445	3330	12785	594	3527	617	504	792	718	2492	1729	1445	1056	6100	11833	684	722	5177	5984	6128	5513	6665	4290	296	5078	1373	421	1966	1344
Ec-01_002730	165	141	326	331	262	231	539	326	186	152	81	1066	1060	318	775	194	177	202	262	308	328	176	130	350	394	837	1265	325	333	566	674	894	867	654	516	55	130	79	111	162	80
Ec-01_002740	71	65	1005	1252	766	797	1399	1104	1075	1648	555	1624	1495	580	2086	1507	1290	1193	964	877	847	730	467	885	722	2127	2884	737	685	1643	1945	1546	1447	1027	1187	526	590	418	671	667	1045
Ec-01_002750	27	27	212	256	223	146	254	194	117	146	89	333	294	103	266	179	132	109	122	111	102	72	74	165	175	262	332	140	188	325	326	159	139	171	223	61	167	61	100	67	91
Ec-01_002770	2	2	51	36	46	52	116	66	89	107	127	278	215	113	337	345	243	157	142	114	137	93	72	196	204	464	635	170	143	550	719	152	142	123	192	81	84	117	149	153	230
Ec-01_002780	10659	8203	9841	8092	13196	5834	10266	9379	1678	2044	2751	5639	13287	3326	6438	2461	1376	3669	4357	3270	3431	1108	751	2902	2859	2090	3286	2407	2607	3439	4058	7848	8026	2979	4709	662	463	1104	2946	2018	2309
Ec-01_002790	157	132	442	302	449	285	338	252	273	402	407	975	1337	957	1754	595	138	754	730	749	710	222	141	922	600	320	291	433	957	302	381	1656	1845	567	1542	272	32	152	514	209	458
Ec-01_002800	2	0	18	10	11	17	16	14	1	0	0	2	5	2	2	3	0	1	0	0	2	0	0	1	0	0	0	2	2	0	0	2	5	6	2	0	0	0	0	2	0
Ec-01_002810	220	188	632	512	1026	604	1192	530	636	783	917	2616	4391	3830	5820	2904	328	3991	4216	2497	2414	900	612	3402	4053	1123	872	3170	3602	924	1170	3949	4767	1459	6454	1100	65	543	1964	806	1384
Ec-01_002820	29	20	605	747	508	351	638	772	176	280	248	1587	1310	444	1497	284	442	330	381	621	670	343	268	306	263	1438	2541	284	294	2417	2750	1283	1067	1131	1438	127	193	435	756	649	732
Ec-01_002830	2	1	18	20	10	25	21	8	3	4	2	0	2	0	4	0	0	1	0	0	0	2	3	10	16	0	3	6	6	0	2	1	0	0	1	1	2	0	1	1	0
Ec-01_002840	822	677	4320	4259	2438	3789	6243	4821	2219	3953	8248	33320	23983	10397	43352	11861	17849	7423	5089	6352	5337	8792	6238	5732	5183	51333	116147	3693	4518	54302	71717	21081	16729	28716	18086	2580	17757	7884	5131	13631	10032
Ec-01_002850	0	0	1	0	0	0	1	2	0	0	0	0	0	0	0	1	0	2	0	0	0	0	0	0	0	0	0	0	0	0	0	0	0	0	0	0	0	0	0	0	0
Ec-01_002860	0	0	0	0	1	0	0	0	0	0	0	0	0	0	0	0	0	0	0	0	0	0	0	0	0	0	0	0	0	0	0	0	0	0	0	0	0	0	0	0	0
Ec-01_002870	6	9	7	36	14	74	98	68	69	87	68	380	493	197	443	205	85	171	115	97	119	82	53	450	490	216	136	321	372	280	259	209	220	184	367	42	15	31	30	52	47
Ec-01_002875	12	11	3	15	3	0	6	4	3	1	2	512	599	829	1840	19	9	6	5	45	211	11	16	198	378	285	33	75	191	0	44	1	0	1	2	0	0	4	1	0	0
Ec-01_002877	47	44	4	9	7	11	9	2	0	1	1	1091	1098	1621	3475	47	27	14	6	67	331	30	32	285	595	525	54	148	373	8	125	6	9	6	11	3	0	3	1	1	0
Ec-01_002880	4424	3646	1534	1181	1249	1260	2211	1517	679	908	1680	2954	3956	2513	4512	872	550	848	967	2211	1936	625	463	1571	1075	1646	2823	766	1106	2493	2710	6619	6790	3200	5589	434	576	658	1197	1097	1431
Ec-01_002890	102	93	202	531	260	214	358	321	53	69	151	194	71	44	176	93	97	83	77	62	77	48	38	70	76	169	178	106	90	158	191	65	46	99	70	61	97	37	59	72	106
Ec-01_002900	82	67	879	937	584	1315	2294	1280	1624	1821	2181	7204	8034	4331	8588	2966	2104	2906	3177	3416	3771	2672	1925	4098	4667	4574	5666	3871	4126	8175	7507	6988	7204	5721	10118	1315	1856	1884	3103	2354	4508
Ec-01_002910	16	20	63	78	53	127	135	96	71	136	93	443	470	112	285	1	1	25	31	107	89	18	8	203	113	8	6	64	113	18	22	275	343	154	229	31	30	19	41	45	65
Ec-01_002920	13	3	181	236	136	193	357	272	170	248	188	501	470	248	645	317	178	247	216	240	240	184	120	507	553	486	610	405	525	520	554	544	591	335	547	214	168	106	188	176	220
Ec-01_002930	0	3	15	22	10	6	1	7	3	1	1	197	180	93	186	5	3	2	2	105	69	4	3	176	104	67	50	92	135	101	133	138	190	152	224	27	4	44	67	97	126
Ec-01_002940	49	22	71	12	10	70	48	21	92	163	2	282	378	40	152	6	3	3	5	214	185	5	2	116	81	80	66	61	90	90	104	172	274	229	240	77	26	77	79	110	169
Ec-01_002950	43	24	180	152	140	152	256	162	478	397	233	3779	4481	2471	3712	363	567	428	894	1018	1284	836	606	1601	1619	850	794	2095	2062	2880	2526	4414	5045	3879	5531	306	741	1108	1489	997	1138
Ec-01_002960	16	12	134	128	98	86	179	161	175	195	177	1302	1363	789	1361	327	356	397	360	697	613	380	324	339	562	604	962	448	399	1023	1168	1550	1344	1088	2049	164	170	239	503	378	243
Ec-01_002965	6	4	49	51	38	42	50	39	5	4	3	29	39	33	18	8	4	12	10	25	40	5	5	61	62	10	6	66	62	41	36	52	55	30	54	28	4	23	27	21	14
Ec-01_002970	123	106	296	337	216	216	418	234	630	460	332	1921	2597	1406	2103	322	406	581	1350	1204	1096	586	447	901	1103	1083	1575	1133	1011	4208	4065	3142	3174	2447	3368	297	379	1139	1789	984	1200
Ec-01_002980	39	32	919	1356	868	1008	4371	3379	1653	1533	5977	12378	9431	4465	17638	7058	7058	5431	3657	4408	5436	4170	2701	4289	4311	8978	14868	3837	4060	12227	14232	5941	4683	8125	5144	1529	4680	2320	4035	3323	5334
Ec-01_002990	2572	2006	448	508	344	202	216	172	611	802	812	2125	1846	2819	5755	1952	828	978	895	1220	1105	1665	1169	2027	1522	2301	2387	1436	2054	3026	3455	2568	3625	3415	9640	851	460	695	986	1021	1390
Ec-01_003000	1503	1315	375	499	188	175	157	77	515	445	472	970	765	1604	2489	914	296	317	353	321	295	1005	925	2211	2283	1758	1262	1898	2547	1486	1761	868	1167	1438	4339	1170	180	139	192	248	275
Ec-01_003010	8	6	5	33	10	6	1	18	2	1	2	154	184	81	336	2	4	0	2	73	48	6	6	154	184	177	124	92	172	420	408	135	166	413	690	20	18	63	99	237	183
Ec-01_003020	0	0	393	682	353	754	578	443	3	0	3	0	1	6	3	660	407	415	410	271	387	0	0	4	4	1	1	3	0	0	0	1	0	1	1	613	359	264	445	383	444
Ec-01_003030	112	115	828	1286	654	786	1177	946	894	839	1073	2174	2351	1149	2384	816	536	781	803	625	813	859	713	1785	2121	830	679	1984	1739	757	823	1777	1623	1621	2257	701	562	423	643	586	1189
Ec-01_003040	274	202	1500	1786	1225	1077	2335	2003	1058	1389	1909	5789	5788	2347	6626	1810	2065	1466	1569	2005	1883	1864	1403	2069	2485	2743	4113	2284	2110	5316	5799	4980	5478	4303	5510	694	1371	1695	2646	2182	2647
Ec-01_003050	511	343	421	623	423	392	505	568	180	242	340	738	694	331	1031	385	379	231	212	347	355	220	148	655	565	1049	1533	472	583	1103	1253	677	581	614	506	379	450	235	322	254	458
Ec-01_003060	6	9	5	19	21	5	3	7	1	0	2	339	353	62	146	7	0	11	29	172	119	5	2	143	109	59	44	78	123	39	52	172	305	132	249	59	1	17	48	65	115
Ec-01_003080	16	6	215	222	121	123	260	237	55	132	34	401	294	144	387	109	91	72	85	123	140	121	98	223	211	136	242	192	236	299	287	417	412	252	311	74	63	76	118	73	65
Ec-01_003090	0	0	15	23	12	12	9	8	0	0	0	0	0	0	0	9	0	13	12	12	6	0	0	0	0	0	0	0	0	0	0	0	0	0	0	11	3	0	10	2	2
Ec-01_003100	22	22	223	301	215	266	551	317	161	213	140	457	675	379	803	170	57	164	210	373	344	84	60	290	501	326	550	324	266	333	376	1194	1132	409	826	211	64	78	252	122	145
Ec-01_003110	3	4	204	216	106	82	66	106	56	140	135	380	245	74	182	16	18	5	8	38	42	12	9	109	65	47	33	110	77	49	59	19	57	119	78	20	9	20	46	30	41
Ec-01_003120	33	32	667	550	251	300	329	352	244	381	451	762	556	289	619	131	142	62	98	98	165	131	80	373	375	189	238	417	403	310	302	239	285	411	268	54	173	188	113	82	89
Ec-01_003130	596	430	1633	2651	1600	1892	3338	2273	1374	1495	2553	18897	20455	12925	26071	2859	2898	2834	2765	6206	6602	4115	3399	12460	12634	13498	24311	11797	12060	27546	27276	26913	27154	16696	25972	2454	4108	6151	12108	6417	8190
Ec-01_003140	7	2	212	204	130	310	507	328	171	290	179	597	560	190	578	289	180	140	153	143	162	135	153	259	221	458	812	207	169	363	342	426	288	388	276	58	219	62	95	90	63
Ec-01_003150	159	132	112	85	114	175	277	168	527	632	487	1775	2131	1233	2071	624	310	702	874	585	793	643	480	1353	1371	631	788	1039	1500	1054	969	1640	1998	1052	3017	167	171	346	663	306	175
Ec-01_003160	45	18	545	669	499	768	1125	881	443	547	454	2277	2208	1223	2811	290	157	759	702	791	754	388	307	393	499	619	592	309	316	317	355	1902	1735	1517	1569	642	577	48	100	59	159
Ec-01_003170	4	3	12	9	3	29	32	24	179	340	38	280	288	48	145	12	22	11	13	95	72	16	10	174	154	77	50	103	110	26	38	131	187	91	130	41	5	25	51	42	75
Ec-01_003180	20	6	275	160	88	436	627	208	193	122	120	809	623	396	1176	128	383	165	202	302	323	527	373	336	360	1722	2553	320	255	1320	1390	628	721	1065	1762	92	935	238	219	300	205
Ec-01_003190	210	181	479	566	328	425	456	358	134	308	110	753	962	609	1020	243	156	260	248	321	306	326	296	407	583	450	600	520	464	592	547	717	809	634	1722	84	56	62	132	141	143
Ec-01_003210	12	11	14	8	10	67	100	36	150	240	194	744	1073	496	864	342	240	501	499	535	518	261	185	582	748	538	934	314	247	780	850	1177	1046	648	921	144	155	733	695	203	310
Ec-01_003220	241	190	421	385	341	338	425	393	284	403	389	1151	1169	499	1326	577	444	511	492	752	683	258	210	967	844	964	1102	696	981	1302	1351	1534	1740	1097	1738	327	357	347	489	568	699
Ec-01_003230	471	413	1899	1900	715	863	632	594	352	397	1464	1673	1025	594	2307	284	277	410	345	824	920	791	643	6280	4182	1052	704	3892	3932	1743	1530	1503	1745	2742	7869	1315	265	1000	1315	668	504
Ec-01_003240	1402	1219	2122	1953	1293	1479	1504	1130	963	1183	910	3836	4775	2546	5199	1351	858	1255	1332	1333	1307	1411	1154	3745	4802	1371	1601	4012	4295	1371	1376	5739	7279	2145	7182	786	260	582	1450	750	1000
Ec-01_003250	31	31	235	357	230	260	455	405	277	410	399	2974	3033	1022	2360	487	907	517	581	696	810	495	370	1360	1202	1475	2038	1365	1539	3102	3435	2240	2498	1781	2047	492	997	835	1303	810	1307
Ec-01_003260	2335	1936	412	445	293	841	2386	950	852	1276	2866	5354	8631	3145	6564	3019	1819	4739	3213	3131	2745	2786	2339	1570	1634	4213	7805	916	918	2672	3244	7047	5478	2688	3290	665	1113	384	909	702	668
Ec-01_003270	156	146	54	66	25	176	199	81	100	121	190	172	226	104	247	276	102	304	215	129	125	230	211	250	287	249	230	152	176	68	100	169	143	98	121	87	73	16	55	45	21
Ec-01_003280	182	172	34	43	21	103	170	62	94	135	216	161	278	113	242	280	126	353	230	164	133	223	203	159	212	337	309	116	126	110	102	192	143	92	77	95	90	16	50	28	16
Ec-01_003290	142	147	487	609	420	592	735	608	844	988	1062	6526	6193	3135	6846	1688	1083	1616	1523	2152	2439	1852	1626	5613	6454	3105	3711	5051	5754	4482	4426	6958	7500	4130	7074	1388	1726	1085	1688	1355	1316
Ec-01_003300	60	49	1235	2154	1142	1481	2162	1812	694	1157	929	4380	4490	2207	4804	1141	982	1021	1015	1240	1322	1463	1224	1621	2572	2644	3484	1862	1629	3421	3435	3655	3207	3921	4813	293	748	847	1115	934	612
Ec-01_003310	139	113	791	1379	708	1242	1639	1026	797	1290	864	2750	2987	1658	3904	1152	682	1105	1158	1102	1392	1069	818	3005	3213	1111	1521	2558	2528	1334	1376	2472	2526	2122	2569	546	913	636	909	707	184
Ec-01_003320	47	35	83	73	84	96	121	110	376	301	103	1545	1045	374	1146	164	304	122	264	513	494	218	146	508	696	728	883	398	563	737	624	759	984	1375	872	149	929	546	269	497	247
Ec-01_003330	14	11	222	249	172	178	233	183	78	124	50	443	376	139	411	100	57	114	112	214	225	106	80	249	357	392	413	272	312	342	323	350	372	505	550	61	117	76	124	97	77
Ec-01_003340	5680	4810	13545	22010	9673	20840	33331	15247	9609	12930	19751	85197	113070	50709	117501	48034	38903	46692	37367	26839	31836	38112	30867	66136	84699	114391	144568	59189	59612	102617	102920	74679	60130	64405	60509	9466	35001	12989	16046	13239	10870
Ec-01_003350	60	34	425	398	328	241	623	387	353	723	785	3444	3946	1411	4077	764	1304	780	771	1767	1497	1078	865	805	790	3045	5375	507	539	4283	5491	4799	4181	3623	5501	564	1558	789	1129	1248	1448
Ec-01_003360	0	0	0	0	0	0	0	0	0	0	0	0	0	0	0	0	0	0	0	0	0	0	0	0	0	0	0	0	0	0	0	0	0	0	0	0	0	0	0	0	0
Ec-01_003370	80	67	231	282	168	193	280	229	259	549	272	1021	971	486	1094	407	263	402	477	463	553	452	398	679	938	439	545	638	654	340	389	871	950	777	1121	334	214	239	429	233	168
Ec-01_003380	134	100	2332	3331	2035	1906	2606	2951	841	1231	1010	5225	6268	2631	6081	782	1236	931	1004	1692	1615	1251	1026	1593	2050	2583	4431	1564	1568	5207	5833	6907	6425	5404	7193	513	1256	1630	2405	2446	2795
Ec-01_003390	52	45	101	112	105	159	162	108	849	1319	711	4929	5678	1953	4281	286	96	744	777	1393	1223	402	356	1997	1642	1504	1222	990	1304	878	881	3447	4081	3619	5763	973	425	581	1153	901	1080
Ec-01_003400	208	191	280	266	209	338	272	236	438	653	319	1457	1595	587	1248	296	159	415	451	448	435	379	339	960	1056	612	508	594	735	447	384	1109	1158	1056	1518	369	260	215	374	197	294
Ec-01_003410	152	155	1391	1904	1103	876	1114	1258	782	1260	801	3929	4482	2067	4630	1103	1103	1071	1150	1232	1322	1294	1112	1965	2201	3097	4310	1822	1577	3859	4376	3251	3353	3004	4388	709	847	773	1246	832	981
Ec-01_003420	113	109	637	799	465	511	840	691	531	763	658	3046	3435	1637	3691	507	712	912	1038	1266	1209	1089	959	1391	1869	1681	3183	1300	1576	2923	3290	3390	3484	2714	4226	310	648	568	952	607	441
Ec-01_003430	0	0	2	6	3	1	3	2	0	0	5	5	2	1	6	1	2	1	1	1	0	0	1	3	1	2	3	1	0	1	1	3	1	1	4	1	0	1	0	0	0
Ec-01_003445	0	1	0	3	1	178	147	0	0	1	0	2	29	2	3	320	132	0	0	6	4	5	9	461	460	0	0	174	205	57	28	3	1	0	0	3	7	2	4	63	50
Ec-01_003450	0	0	0	0	0	4	6	0	0	0	1	0	0	0	0	0	0	0	0	0	0	0	0	1	0	0	0	4	0	1	5	0	0	0	0	0	0	0	0	0	0
Ec-01_003440	0	0	0	2	2	131	92	0	1	11	6	27	17	0	8	86	44	0	0	5	1	0	2	268	306	8	11	211	190	320	421	12	5	10	40	3	9	0	1	33	61
Ec-01_003460	0	0	1	2	0	0	1	0	0	0	1	0	0	0	0	0	0	1	0	0	1	0	0	1	0	2	0	1	0	6	8	0	0	0	2	0	0	1	2	0	0
Ec-01_003470	62	65	748	1065	543	537	791	958	327	381	439	2834	3054	1501	3893	432	539	413	517	689	694	1012	870	1452	1859	1651	2905	1409	1374	3015	3350	2876	2560	2787	3531	224	669	537	897	559	566
Ec-01_003485	0	0	231	363	196	122	253	345	0	0	0	2	0	4	2	0	1	0	1	2	4	0	0	0	0	0	1	0	0	2	0	0	2	0	0	0	0	0	2	2	1
Ec-01_003490	663	516	2054	2614	1602	2415	2573	2025	2084	1967	1948	6612	7238	2959	7509	1396	1098	940	851	1302	1315	2573	2065	6992	6885	5684	6383	5967	6670	5461	5798	8376	7894	4740	9099	941	1674	638	998	789	972
Ec-01_003500	96	77	1746	2427	1519	2249	2992	2442	365	513	626	4202	4471	2029	4803	1026	1208	1020	940	1430	1413	1220	1044	1979	2658	3369	5616	1801	1738	4418	4916	4067	3345	3641	3770	427	1008	812	1188	1049	432
Ec-01_003510	67	50	260	475	363	340	298	312	238	565	351	2581	3065	911	2203	389	140	266	364	1137	772	336	325	1165	1102	890	943	679	880	965	1048	1921	2617	2081	3670	427	231	329	695	592	581
Ec-01_003520	48	38	322	421	310	445	727	556	396	554	439	4520	4549	2384	4598	766	1073	807	894	1222	1261	710	585	1511	1673	2102	3195	1484	1443	3709	3980	4071	3943	3427	4022	475	1350	942	1390	1124	1155
Ec-01_003540	7591	5975	12561	15359	11308	11598	13710	13736	43877	27632	77795	71814	75303	37063	117797	10408	35195	9494	9656	12240	12094	34829	27128	96237	64553	38409	66375	47108	77844	94944	107063	96944	100510	62724	93060	6301	62392	20919	16728	27971	27000
Ec-01_003530	0	0	0	0	0	0	0	0	0	0	0	0	0	0	0	0	0	0	0	0	0	0	0	0	0	0	0	0	0	0	0	0	0	0	0	0	0	0	0	0	0
Ec-01_003550	136	117	591	800	546	746	965	839	404	561	2578	2780	3581	1556	3516	547	493	556	690	857	890	629	546	1729	1745	1486	1750	1467	1474	1636	1737	2686	2638	2214	3449	468	335	395	679	485	460
Ec-01_003560	78	75	499	613	362	529	562	541	367	573	288	1548	1672	811	1713	599	493	508	580	536	596	643	517	1246	1235	1405	1776	932	1355	1885	1843	1209	1193	1072	1717	319	300	339	499	365	452
Ec-01_003575	2	3	57	88	83	206	218	86	0	2	6	6	7	8	5	74	13	57	71	69	84	1	0	16	16	1	0	5	19	2	4	0	12	1	5	88	15	32	113	41	14
Ec-01_003570	76	62	172	156	145	352	422	268	337	467	285	1740	2218	1186	2266	412	93	373	436	610	549	341	299	1413	1731	1147	1247	1404	1404	952	1033	2672	2519	1449	3214	402	78	259	727	308	403
Ec-01_003580	0	0	0	0	0	0	0	0	0	0	0	0	0	0	0	0	0	0	0	0	0	0	0	0	0	0	0	0	0	0	0	0	0	0	0	0	0	0	0	0	0
Ec-01_003590	241	213	244	340	284	606	794	418	435	623	363	1448	1729	1019	2037	704	307	638	776	638	657	591	555	854	1495	744	896	1176	927	636	665	1458	1464	1246	3051	355	132	232	505	256	279
Ec-01_003600	251	196	1152	1011	834	1463	2043	1430	736	995	686	3948	4902	3035	5468	1761	865	1565	1568	2384	2124	1229	1177	1907	2746	2903	4107	1866	1931	2024	2343	5051	4622	2595	5414	1024	581	683	1624	892	1288
Ec-01_003610	482	399	426	493	306	435	497	329	363	399	380	998	1403	961	1783	495	192	661	693	895	725	675	584	795	1055	1036	1388	644	686	589	715	1437	1483	697	1876	342	179	134	337	192	192
Ec-01_003620	266	214	2092	1238	1326	720	1138	923	900	599	891	2372	4478	2256	2409	125	228	186	211	434	493	959	859	3776	2242	472	1052	1273	5966	1778	1868	15788	18795	1504	9676	119	243	390	678	496	651
Ec-01_003630	2964	2516	985	1457	1099	415	817	929	966	1307	2152	1784	2003	1006	2378	763	744	857	794	567	510	1285	971	451	366	785	892	295	358	988	1107	1006	1135	1873	2061	117	459	255	415	416	225
Ec-01_003640	3078	2530	4670	4408	2531	1765	2882	3779	1863	3037	3293	13281	16785	6092	14380	1757	3713	1657	2005	3195	3568	3311	2656	5756	4502	7219	12921	4052	4273	11081	13431	10169	9922	9350	12636	1292	2857	2125	3894	2661	1609
Ec-01_003650	97	63	622	794	429	515	579	485	692	1041	835	2907	2848	1302	2752	650	823	764	825	1087	1065	819	630	1626	1625	2202	2946	1579	1399	3505	3689	2669	2519	2552	4088	802	988	788	1296	735	959
Ec-01_003660	14	8	57	59	64	245	239	103	125	95	61	1330	1560	759	2011	147	169	108	147	232	307	269	213	1227	1394	1217	1758	875	1064	1418	1255	1163	1097	1620	1468	176	442	267	306	284	331
Ec-01_003670	42	38	436	524	349	589	845	619	395	507	419	2462	2956	1384	2489	640	502	578	650	705	786	756	626	1796	2258	1597	2305	1654	1694	2107	2270	2447	2232	2069	2589	246	565	341	506	377	567
Ec-01_003680	254	226	1137	1308	824	979	1672	1277	754	928	956	5529	6353	3688	6724	1218	955	1509	1511	1949	1901	1444	1242	4388	4532	2950	4950	3255	4431	4467	4690	6679	6071	3940	6535	806	1168	1142	1933	1185	639
Ec-01_003690	98	78	619	701	468	337	278	268	313	557	175	800	793	406	1022	191	92	180	202	283	379	138	110	1265	1411	1095	1241	949	1021	501	491	644	599	588	874	231	120	153	272	88	149
Ec-01_003700	9	5	25	34	47	11	9	20	9	7	10	793	996	470	1366	39	23	32	39	267	216	40	29	514	437	394	317	256	543	755	844	613	958	1177	1983	81	49	138	290	526	471
Ec-01_003710	8	7	13	12	15	32	20	22	9	36	45	376	260	99	275	52	41	52	52	128	141	42	43	191	189	108	84	166	137	132	124	194	242	210	361	107	60	40	60	50	63
Ec-01_003730	15	13	87	119	69	119	165	106	33	36	22	328	318	105	248	67	53	32	30	46	48	87	76	118	146	159	162	86	92	153	130	150	165	224	130	10	93	25	20	24	15
Ec-01_003735	15	15	183	248	117	294	243	150	91	152	59	533	579	375	750	208	173	179	183	273	285	173	169	447	588	573	656	528	513	569	573	504	461	404	574	182	174	93	131	80	50
Ec-01_003740	178	96	1949	2298	1781	1315	1373	1656	1085	2145	1014	3271	2511	1116	3544	1776	2268	1484	1361	1823	1445	675	428	1206	1080	3354	3722	1087	1175	3948	4672	3004	3044	2792	3411	1092	1719	1074	1615	1638	3032
Ec-01_003750	33	23	734	995	680	499	660	814	435	696	488	915	752	374	1082	450	663	347	403	481	449	215	162	320	391	1112	1387	350	401	1337	1541	760	589	705	702	311	847	380	554	501	877
Ec-01_003760	221	167	813	1116	785	848	1518	1128	496	587	587	1962	1846	771	2282	1111	1069	927	893	891	964	1066	674	1113	950	1820	3031	778	928	2101	2298	1510	1414	1349	1327	299	770	420	519	417	398
Ec-01_003770	6	4	275	290	189	251	427	296	106	143	139	354	369	320	598	185	120	173	169	160	147	318	194	308	259	453	562	284	180	379	441	361	414	229	757	56	13	55	138	106	200
Ec-01_003780	107	82	588	620	417	462	834	465	685	577	625	2770	3107	1716	3715	710	1147	656	756	994	952	1389	1133	1204	1045	2089	3491	979	1029	4160	4299	2961	2892	2838	3949	224	1197	762	841	843	373
Ec-01_003790	26	28	49	76	68	51	19	22	2	1	2	707	854	181	583	11	10	3	15	350	268	10	3	347	245	230	147	213	343	260	347	536	916	531	821	63	20	127	259	405	564
Ec-01_003800	820	719	5744	13187	6481	18294	20906	11829	13130	29828	9533	27716	27397	17053	36708	18281	10568	22167	21917	13823	16317	16405	11486	60666	55360	27842	28056	47687	56065	24657	24560	27744	27607	18696	30611	13969	14248	3086	5476	3604	2252
Ec-01_003810	52	56	257	408	199	313	387	259	87	94	56	697	643	308	464	125	118	67	95	121	169	156	143	392	495	289	374	491	458	269	267	412	374	414	617	83	102	115	188	138	311
Ec-01_003820	44	45	410	423	407	261	502	495	9	20	18	667	539	160	247	15	11	9	9	99	77	27	19	287	236	581	1129	165	159	145	184	357	512	274	948	59	15	119	209	99	99
Ec-01_003830	11	1	129	167	136	199	240	224	112	147	438	640	597	316	758	233	157	137	150	366	353	75	69	477	202	675	889	163	343	746	878	692	761	755	732	149	429	265	320	410	641
Ec-01_003840	3	1	28	18	37	19	53	59	27	33	48	433	306	105	410	41	75	51	56	119	133	75	71	93	86	260	317	53	78	414	399	211	229	282	377	32	50	90	96	129	170
Ec-01_003850	8	11	408	764	386	294	926	773	191	257	364	1587	2356	751	2546	339	500	525	346	410	430	446	364	400	522	414	1299	378	348	803	752	1063	1408	1047	1174	53	269	168	487	176	768
Ec-01_003860	53	38	137	123	67	295	250	184	228	471	354	1740	1437	490	966	257	83	255	292	557	455	89	76	605	512	381	353	414	399	292	305	879	1094	567	799	327	112	223	339	282	496
Ec-01_003870	428	380	302	248	247	349	646	536	292	349	231	2013	2478	1216	1949	353	116	410	512	1263	1354	242	199	868	838	674	1368	815	688	1156	1135	4705	3910	1386	2655	432	228	444	1151	536	1041
Ec-01_003880	127	117	950	1138	726	1539	2137	1061	3731	2803	2864	10351	10355	5010	10221	3968	4097	3009	3331	3094	3613	4203	3578	10295	12723	9995	12679	12062	11760	9382	9355	6937	7352	6996	7139	3088	3388	1902	2871	2195	3182
Ec-01_003890	21	20	760	884	579	515	998	968	358	411	368	2109	1653	581	1577	594	343	612	573	822	773	541	394	785	945	2330	3607	954	760	1464	1833	1318	1061	1283	1199	370	250	266	571	401	638
Ec-01_003900	33	15	239	267	211	188	358	286	444	389	483	1276	1525	534	1050	1019	690	872	729	743	919	378	207	1189	742	506	605	750	1063	1283	1200	1236	1351	853	781	357	588	681	786	476	824
Ec-01_003910	33	34	670	990	609	385	748	903	332	484	387	1208	906	294	1118	434	668	281	304	580	529	297	225	358	328	1456	2408	404	335	1962	2372	803	650	985	798	208	818	394	496	607	1009
Ec-01_003920	975	839	1092	1099	1025	469	717	588	214	296	184	806	923	468	673	146	176	116	187	307	318	149	140	279	275	292	255	265	295	447	453	1107	1333	678	1132	66	346	366	413	541	569
Ec-01_003930	130	101	247	332	232	216	265	207	145	224	142	782	676	231	682	279	261	230	245	399	272	110	64	462	497	422	363	463	711	765	769	728	810	638	498	115	108	245	299	411	463
Ec-01_003940	1	1	35	61	35	58	29	41	10	19	32	18	52	39	39	18	14	4	6	25	18	4	3	107	119	32	8	208	243	39	32	46	50	13	49	2	10	87	164	48	106
Ec-01_003950	8	7	23	51	43	42	30	27	17	7	13	27	63	43	38	6	4	1	1	13	10	1	2	682	944	25	0	1385	1339	15	5	27	43	27	39	3	0	85	160	30	53
Ec-01_003960	58	40	853	1005	913	1080	1715	1424	489	503	686	2620	2835	1537	4298	818	1237	490	463	774	775	1033	793	2387	2152	3669	5940	1551	1744	3728	4005	3343	2825	2307	2154	358	1942	558	694	821	939
Ec-01_003970	0	0	19	38	25	20	25	26	5	8	2	18	49	26	35	17	8	20	17	18	16	0	1	17	6	12	26	4	8	11	19	26	28	7	8	14	20	8	6	20	34
Ec-01_003980	0	0	13	14	5	9	7	0	0	0	0	0	1	0	0	0	0	2	7	0	1	0	0	0	0	0	0	0	0	0	0	0	0	0	0	2	0	0	0	0	0
Ec-01_003990	18	15	67	68	37	15	23	29	296	703	1612	4158	3272	1766	4213	2474	2560	5277	4157	1519	1532	2446	1730	142	185	241	116	128	183	570	537	413	713	2615	7782	236	123	612	652	452	283
Ec-01_004000	290	266	2385	1130	820	900	1639	1032	4581	2016	11630	550	1158	733	1298	249	320	2952	2515	1114	1213	478	313	3092	744	331	487	804	2694	388	478	3512	3479	358	1123	90	336	69	143	110	189
Ec-01_004010	1854	1732	4128	2710	1644	2908	3125	1806	8602	2983	15745	1023	2024	2339	2791	453	535	4309	3875	1385	2144	1558	1413	14014	4563	636	767	3809	12551	611	679	5604	4927	769	2479	262	509	128	177	170	159
Ec-01_004020	51	40	303	354	229	251	416	330	219	154	685	1183	822	194	704	60	176	177	186	273	285	143	86	294	310	402	331	555	434	1307	1298	495	608	976	764	62	482	416	618	517	787
Ec-01_004030	30	30	633	804	509	650	769	937	728	1384	1259	4897	3737	1786	4795	1513	2041	1681	1637	3552	3203	1058	846	2505	1884	5684	6563	2343	2239	10181	11238	8458	6147	6041	6985	2399	4052	2725	3862	2434	3777
Ec-01_004040	2	0	7	15	6	12	19	10	1	14	31	127	107	77	183	23	36	8	16	61	47	49	22	14	21	75	242	21	16	292	354	139	141	138	350	8	51	43	86	50	74
Ec-01_004050	0	3	38	60	32	13	53	33	43	62	99	103	61	38	159	67	107	33	38	97	95	79	70	83	99	154	167	84	81	202	205	100	101	111	231	81	172	77	119	107	250
Ec-01_004060	272	231	737	676	523	413	546	512	492	756	625	491	551	281	652	424	423	282	373	476	385	152	104	414	301	434	573	255	423	616	696	752	772	400	525	175	427	201	302	346	403
Ec-01_004070	0	0	41	38	28	26	22	17	0	0	0	1	1	3	0	12	11	13	7	13	8	0	0	1	0	0	0	0	0	0	0	1	3	0	0	3	9	8	15	4	4
Ec-01_004080	65	51	594	597	467	1232	1625	1192	819	1310	1958	3897	4513	2155	4721	1675	1174	1279	1142	2109	1979	818	601	2359	1785	3655	5900	1412	1481	4200	4689	7412	7052	3586	4884	836	2038	1229	1810	1667	2762
Ec-01_004090	1	1	69	91	54	48	75	84	21	24	6	55	122	58	96	9	14	18	28	45	44	2	0	101	35	33	49	13	114	42	34	269	295	51	26	11	33	15	23	21	48
Ec-01_004100	4	2	22	16	13	45	221	56	64	90	80	996	1169	386	1214	333	200	219	203	726	572	140	96	289	321	619	833	242	340	989	1064	1485	1753	1435	1036	103	141	368	498	874	1198
Ec-01_004110	142	127	25	36	63	32	54	36	33	84	20	346	469	119	287	12	11	6	14	164	118	10	7	234	217	122	63	152	212	260	253	245	397	354	466	40	11	106	91	266	189
Ec-01_004120	4298	3344	1045	2324	3794	3375	9222	8237	4338	4653	10470	24383	22895	10022	38021	10532	11685	8621	7131	15814	14781	6622	4067	18565	13220	27005	56796	9883	12117	34919	44161	36864	31575	23093	17603	5549	13656	7900	13925	13034	16615
Ec-01_004130	11	8	9	26	15	65	69	53	21	40	27	195	117	27	87	35	8	26	28	109	76	7	1	105	93	98	152	85	70	123	138	114	175	139	148	203	49	99	144	96	117
Ec-01_004140	12	8	46	57	32	41	37	34	74	77	33	427	362	359	1063	64	59	39	81	810	639	31	29	557	515	2711	3322	604	581	3640	4673	1003	706	2006	1100	821	460	565	766	650	890
Ec-01_004150	51	36	464	446	345	262	581	406	389	452	344	1456	1624	722	1643	513	559	428	478	862	818	360	290	542	587	1075	1493	538	614	1629	1899	1763	1746	1322	1694	302	518	498	753	766	1191
Ec-01_004160	2538	2109	6144	9190	5447	2908	5493	8158	1413	2104	2030	10703	8537	3189	14219	1760	5519	1968	1805	2888	2833	4023	3001	2656	2770	11413	18568	3560	2859	22030	26412	6555	4855	8373	5699	1216	5492	2568	3990	3662	6575
Ec-01_004170	9	13	5	12	22	1	3	8	0	0	0	310	381	53	144	8	0	2	2	156	103	6	4	381	220	55	25	120	223	34	39	233	293	120	222	48	6	27	58	57	67
Ec-01_004180	72	39	6	11	14	11	4	9	1	3	2	855	776	171	290	15	4	1	5	200	164	10	6	323	332	41	21	255	299	113	106	545	1005	599	505	56	16	114	116	162	245
Ec-01_004190	26	31	3	16	7	11	3	2	4	23	7	443	612	114	206	5	2	2	3	142	95	10	6	250	228	47	48	143	232	115	122	217	393	251	274	23	4	26	37	48	87
Ec-01_004200	7	12	214	230	148	371	465	376	587	1030	710	1162	1043	469	1115	731	613	504	481	592	543	193	137	1339	563	1148	1534	671	738	1433	1629	1234	1309	728	926	487	480	429	682	596	1044
Ec-01_004210	0	0	0	2	1	0	1	0	0	0	0	0	0	0	0	0	0	0	0	0	0	0	0	0	0	0	0	0	0	0	0	0	0	0	0	0	0	0	0	0	0
Ec-01_004220	63	45	107	287	190	56	27	96	22	42	17	554	530	92	260	12	3	5	7	176	123	11	5	380	215	68	75	142	237	138	145	356	560	282	262	34	6	84	104	160	249
Ec-01_004230	331	230	970	1209	818	534	858	791	228	434	225	1021	1306	367	763	381	344	378	295	517	369	226	168	392	347	566	779	278	462	1092	1225	1172	1511	595	951	182	181	242	424	319	609
Ec-01_004240	351	316	579	669	550	563	586	472	691	733	419	1459	1914	858	1601	637	363	557	722	707	754	374	297	1153	1499	626	762	1444	1630	939	929	1819	2264	1145	1514	348	224	447	885	573	570
Ec-01_004250	131	120	5200	6759	4815	2708	8735	10083	1339	1478	1354	15380	15179	1970	6321	3674	1116	4225	3834	4444	4578	1510	1046	2263	2439	5724	14038	2168	2008	4842	6204	10693	9259	3830	3347	768	342	1077	4329	2104	3092
Ec-01_004260	0	2	23	15	4	82	106	55	33	66	42	212	242	72	297	114	41	44	41	159	125	30	25	222	176	261	251	177	239	212	210	311	318	293	357	66	34	74	126	164	311
Ec-01_004270	7	7	32	35	23	47	34	44	66	106	124	693	543	340	700	205	173	169	202	202	247	121	81	368	200	166	151	262	297	309	318	417	415	362	477	127	154	163	218	98	127
Ec-01_004280	57	41	190	249	174	249	283	182	182	188	201	980	730	352	1163	400	290	295	292	302	331	347	237	593	766	731	734	838	710	1003	1139	549	665	830	1068	251	176	276	448	348	427
Ec-01_004290	36	34	131	199	138	132	274	178	144	181	190	949	807	372	1029	292	283	281	220	343	340	192	150	343	318	466	647	271	336	953	992	675	857	830	1280	141	167	244	420	373	562
Ec-01_004300	35	31	246	358	218	287	368	230	503	721	606	2254	2420	1404	2606	742	727	757	807	742	860	613	522	1689	1584	1114	1219	1638	1806	2299	2233	2373	2408	1722	3387	751	563	783	1230	752	1399
Ec-01_004310	46	46	1080	1902	1051	175	229	621	13	29	14	614	486	88	674	25	15	5	14	578	467	7	10	1031	541	928	2054	623	586	4234	5349	3634	3603	1864	3403	142	72	436	754	711	805
Ec-01_004320	116	96	1707	1742	1826	1327	2794	2929	1444	1802	2695	8705	8220	4586	11811	1821	3896	1968	1984	3555	3528	3091	2217	6056	3501	5443	9603	3109	6247	12257	13242	15796	17379	7021	16146	1971	3472	3174	6432	4676	7686
Ec-01_004330	45	31	270	317	240	376	713	415	319	361	499	1729	1657	949	2119	740	372	676	638	691	749	554	427	1636	1726	862	1266	1403	1590	1540	1313	2182	2575	955	2949	351	418	429	928	663	672
Ec-01_004340	6	11	174	232	121	167	228	158	86	90	85	458	465	228	521	161	180	118	132	117	152	166	119	281	304	422	417	309	303	416	454	336	285	305	275	78	153	67	100	82	110
Ec-01_004350	55	34	761	917	551	366	608	653	231	320	202	1269	922	431	1357	237	491	182	229	399	385	375	234	549	455	1196	1634	746	597	1977	1970	986	952	1081	1082	184	672	551	780	614	1126
Ec-01_004370	3	1	246	259	180	288	294	332	60	168	157	527	452	197	647	240	417	237	208	423	321	111	64	89	60	638	1428	87	75	1048	1261	550	429	431	356	79	261	153	255	237	306
Ec-01_004380	98	91	24	29	29	21	12	12	5	5	11	240	311	60	351	2	1	12	26	817	568	4	7	843	996	247	251	347	414	456	449	1733	3466	1380	1935	113	32	854	1136	763	934
Ec-01_004390	52	48	241	371	163	448	760	363	534	801	413	912	968	710	1537	671	427	608	570	569	622	353	270	2128	1459	735	974	1298	2480	694	774	1376	1550	737	1155	518	278	347	724	497	567
Ec-01_004400	26	29	285	390	219	461	450	336	149	144	167	439	391	113	320	366	108	235	230	208	246	102	82	469	534	367	505	426	531	175	226	373	300	197	140	181	79	75	163	84	132
Ec-01_004410	18	5	455	614	354	433	613	573	237	374	330	699	464	229	792	524	453	340	343	442	469	285	170	441	392	1207	1557	421	391	1023	1140	534	421	452	481	288	519	357	501	385	574
Ec-01_004420	1133	842	820	1213	759	602	711	730	696	922	705	934	929	422	977	459	579	394	450	522	480	303	228	748	548	1091	1546	607	608	1548	1729	929	956	757	1098	340	548	362	557	476	854
Ec-01_004430	195	142	1171	1909	916	1143	2074	1309	553	731	848	4598	5071	2704	5897	1258	1444	771	809	923	1023	1574	1219	2210	2351	6141	9628	1914	1790	6663	6869	4033	3911	3927	7320	458	1702	1031	1132	1315	1216
Ec-01_004440	97	83	233	439	301	264	272	255	134	283	95	260	221	104	203	131	128	96	83	74	97	79	60	200	199	294	296	230	272	207	258	176	168	183	126	56	122	61	83	81	115
Ec-01_004460	59	41	507	551	265	744	814	381	356	528	364	1564	1273	427	994	990	71	904	962	1280	1111	189	167	723	749	913	1147	532	763	472	568	1591	1784	659	1295	482	15	209	658	402	473
Ec-01_004470	65	50	263	298	122	424	433	180	181	229	168	924	705	330	719	749	45	626	581	687	647	139	132	897	1232	586	491	774	1145	191	245	875	877	423	961	848	13	113	431	231	279
Ec-01_004480	0	0	208	244	173	200	500	319	96	142	155	383	300	76	474	261	200	247	214	271	247	119	83	100	130	589	943	98	100	285	369	311	221	244	131	95	185	49	81	102	134
Ec-01_004490	8	9	157	232	147	167	294	214	153	280	187	483	424	245	665	303	221	263	242	340	306	123	83	236	233	610	695	220	338	699	837	622	619	390	427	132	248	122	256	224	423
Ec-01_004500	32	42	361	342	197	213	392	265	350	451	468	1192	1386	875	1637	588	411	556	580	410	437	646	486	732	850	857	1020	754	777	935	1013	1026	1020	880	1203	202	382	255	348	224	240
Ec-01_004520	5	10	2	15	12	8	7	11	2	1	0	264	323	64	157	2	1	1	5	98	61	8	4	234	120	69	53	92	152	69	111	199	297	125	266	21	6	53	55	100	110
Ec-01_004510	492	391	757	853	337	174	214	228	1178	2345	1711	1928	521	358	1521	2485	917	425	661	1004	903	583	380	691	491	2262	2300	360	1517	4664	4841	547	802	2926	2252	871	695	1146	1109	890	1013
Ec-01_004530	61	46	645	520	422	375	1036	735	275	371	359	1739	1829	848	1778	620	360	624	678	644	630	505	422	647	734	796	1192	519	434	691	761	1601	1791	805	1485	175	208	217	427	349	422
Ec-01_004540	190	128	563	570	437	355	783	735	1478	1549	1276	10871	13682	6694	11060	1336	2329	2134	2937	3822	3755	2075	1514	2647	2840	3809	5782	3063	3180	15103	15294	19069	18301	9983	18383	988	1721	4481	7341	4693	5291
Ec-01_004550	26	29	241	265	192	279	349	212	219	261	194	946	713	620	1216	515	157	396	398	428	447	229	151	1091	1176	444	591	1209	1358	666	490	957	1050	581	1063	558	124	202	433	220	355
Ec-01_004560	171	135	385	258	189	211	237	139	430	424	380	1691	1788	1078	1622	517	246	465	533	927	904	550	386	810	900	896	1164	696	981	1030	997	2901	3727	1279	4844	283	408	334	617	381	755
Ec-01_004570	13	9	14	11	13	18	18	18	33	55	36	81	140	73	167	62	29	60	53	42	35	79	66	123	143	36	31	90	124	34	32	149	143	43	205	39	9	7	12	15	12
Ec-01_004580	64	64	580	549	308	354	636	367	408	550	584	1982	1579	636	1688	1151	883	1044	1089	1094	1095	376	229	510	587	660	652	693	461	1138	1305	1106	1447	853	1499	370	680	681	1140	694	1283
Ec-01_004590	92	79	349	349	145	323	295	138	358	285	358	1314	1149	643	1241	572	310	502	497	331	439	365	329	864	1440	442	266	1329	910	486	438	612	644	610	1157	536	316	168	273	158	100
Ec-01_004600	7	4	6	2	5	4	2	5	0	0	0	547	597	174	664	7	18	4	7	329	222	6	5	94	65	251	200	49	99	890	972	329	626	794	1073	28	32	184	263	658	785
Ec-01_004610	0	0	3	2	8	19	16	10	11	8	3	71	87	11	67	9	3	6	4	57	27	1	2	36	25	24	20	22	29	42	37	47	85	57	73	23	2	15	32	45	64
Ec-01_004615	9	10	5	9	8	22	13	7	9	3	3	407	416	181	696	13	2	2	3	137	104	9	9	275	321	211	116	232	356	270	232	269	373	539	757	62	23	61	123	201	183
Ec-01_004620	3	1	0	0	2	1	3	4	5	7	2	193	218	87	263	2	9	1	3	86	55	4	3	39	42	55	58	16	35	147	136	158	258	263	412	7	11	27	42	88	134
Ec-01_004630	16	17	270	351	156	408	676	347	415	537	322	1562	1503	736	1629	287	323	360	440	785	772	412	316	711	637	1228	1997	643	766	1988	1873	1856	1729	1444	2018	155	512	452	561	368	429
Ec-01_004640	86	54	253	282	168	339	427	227	150	224	173	1745	1804	1061	2112	353	222	379	397	652	642	339	279	889	1328	953	1288	1037	1053	1642	1432	1628	1856	1425	2722	207	211	282	547	364	214
Ec-01_004650	17	16	37	52	49	55	350	85	63	104	49	4908	4220	1273	5292	343	269	278	217	1589	1124	251	168	908	1505	2039	2229	787	977	3771	3882	6202	6235	7337	5042	240	243	802	1036	2124	1381
Ec-01_004660	139	107	16	32	32	19	19	36	1	5	1	7208	7136	786	1295	20	19	18	29	1064	771	67	49	1066	967	191	174	418	542	581	752	2870	5380	2473	1699	74	58	545	577	770	570
Ec-01_004670	4435	3365	880	1243	1022	1065	1365	973	890	1239	1256	2880	3390	1432	3115	842	1107	1109	1120	1267	1116	701	427	974	626	1368	1989	713	945	2522	2712	2498	3265	1739	3292	429	402	994	1930	1327	2748
Ec-01_004680	20	15	104	218	241	112	180	177	15	38	24	257	219	83	271	130	146	79	100	293	268	10	11	85	136	163	74	108	142	232	282	166	189	343	273	101	137	136	239	298	312
Ec-01_004690	2365	1745	271	755	676	510	438	352	234	288	188	1006	1049	455	1045	399	298	181	229	415	411	251	184	727	760	554	574	790	860	838	764	773	733	693	1058	363	284	267	465	291	593
Ec-01_004700	5	5	5	15	15	16	11	12	12	21	8	167	312	58	122	7	2	4	6	102	58	9	3	92	48	51	44	62	94	31	44	138	250	51	93	1	5	20	55	44	81
Ec-01_004710	280	227	8016	10249	5973	9166	17779	12372	6301	6935	13611	25914	27156	9212	38654	18705	18476	18996	13925	13150	13021	12643	7639	29988	20983	52903	87330	13817	16591	48779	56718	35867	27562	20088	12164	5397	28594	4329	7592	9194	5170
Ec-01_004720	9	5	96	151	128	173	273	177	101	104	97	574	561	217	712	304	173	241	234	188	187	299	164	264	241	264	325	203	177	273	299	443	497	273	411	78	50	87	169	137	172
Ec-01_004730	9245	7653	2557	3283	2539	1336	2021	1921	1205	1438	1446	5762	6455	3586	7638	1339	1948	1218	1681	2229	2275	1920	1592	2966	2044	4318	5451	2050	3434	7692	8017	5943	5970	5100	8633	655	2017	1590	2259	1817	2260
Ec-01_004740	2	1	4	10	5	21	53	25	191	378	186	1161	773	335	1077	1100	412	988	807	401	485	744	535	193	321	810	938	259	210	484	569	531	559	574	314	225	414	167	230	83	95
Ec-01_004750	2	2	2	10	1	7	6	5	4	2	0	2	1	0	5	2	1	0	0	0	0	0	0	2	1	1	0	0	1	0	1	1	0	0	1	1	2	0	1	2	2
Ec-01_004760	1268	1004	729	876	1045	581	516	633	214	302	191	643	675	271	785	239	266	156	192	238	281	144	119	812	806	345	316	834	899	452	452	613	766	602	776	156	188	191	241	353	384
Ec-01_004770	45	38	130	181	75	234	159	78	260	193	158	220	198	82	141	122	78	50	82	62	53	200	189	373	399	223	200	474	331	71	82	161	164	76	202	108	120	90	152	94	75
Ec-01_004780	151	110	794	786	473	623	852	441	481	960	672	1159	1143	337	720	776	876	773	780	880	714	428	245	471	343	1326	2477	375	504	1222	1245	1208	1490	454	1084	297	1170	511	911	397	756
Ec-01_004800	20	16	27	62	54	63	103	77	94	100	166	855	950	502	1260	306	131	313	239	771	530	101	85	1379	683	2412	3035	601	811	1384	1408	2211	1811	757	1596	748	1542	231	477	421	472
Ec-01_004810	686	561	779	805	490	617	1204	737	1004	1058	2714	1770	2389	1121	1857	918	840	1205	1039	728	834	971	654	1949	1289	586	556	1173	1190	610	688	1593	2302	886	1944	244	245	359	628	402	477
Ec-01_004820	28	18	493	490	325	238	431	338	530	679	700	563	537	344	810	610	477	508	545	635	569	242	148	420	284	757	857	322	341	950	963	674	826	366	810	250	287	306	461	358	711
Ec-01_004830	1216	941	480	567	380	479	845	472	315	432	794	1149	1084	385	1431	664	604	462	385	663	563	320	220	532	468	1540	1948	383	320	1291	1620	990	979	900	1022	376	427	355	596	623	1195
Ec-01_004840	4	4	94	124	61	149	185	149	88	178	94	1017	722	390	954	228	225	174	247	301	291	190	142	348	603	649	856	537	381	1365	1521	674	618	786	1077	159	246	243	363	272	224
Ec-01_004850	856	714	95	255	227	167	139	109	64	60	96	915	925	218	857	120	80	31	47	261	181	53	40	479	546	405	205	485	534	1003	989	585	808	1187	1448	103	35	212	274	571	463
Ec-01_004860	16	20	79	84	46	124	95	63	95	171	79	362	492	199	475	149	68	123	187	191	214	117	92	134	261	205	272	263	175	243	270	372	380	312	620	72	72	74	123	79	64
Ec-01_004870	111	89	178	303	169	224	330	229	64	116	55	322	328	112	291	77	84	70	105	99	103	126	100	155	243	173	230	220	215	286	312	190	217	187	194	28	87	61	94	88	84
Ec-01_004880	130	82	972	1051	738	485	1463	1322	264	321	390	2294	2729	1030	2334	529	773	610	569	593	622	759	567	602	674	1194	2271	482	476	1854	2081	1950	1668	1140	1577	127	575	314	367	391	276
Ec-01_004890	1	2	232	390	183	109	245	267	120	153	123	504	331	130	409	203	233	141	135	225	260	136	85	132	158	401	574	168	152	467	559	288	298	397	359	87	396	132	157	171	260
Ec-01_004900	55	46	170	215	158	174	269	216	108	170	84	688	638	323	720	187	166	139	162	232	217	185	141	238	316	298	360	257	266	486	511	570	526	588	904	50	133	129	187	176	150
Ec-01_004910	181	148	188	204	158	129	225	190	158	149	95	397	379	128	389	157	177	120	152	191	168	85	43	205	195	461	565	184	221	519	619	388	332	254	316	114	169	101	115	148	201
Ec-01_004920	2	3	71	66	26	143	120	97	44	26	56	770	606	194	884	91	278	52	81	65	107	92	77	853	899	306	423	326	452	740	587	711	607	736	346	43	1988	112	64	130	87
Ec-01_004930	7	5	557	581	406	485	938	891	123	118	264	1162	925	294	1068	367	370	301	245	279	316	191	125	623	542	982	1470	374	569	898	1129	800	575	443	297	164	648	109	140	212	183
Ec-01_004940	14	13	7	21	13	14	9	11	4	4	5	1096	1058	558	1037	28	21	4	9	290	261	34	20	325	415	203	119	239	294	217	353	364	593	426	442	67	46	113	139	207	304
Ec-01_004950	1	3	2	5	8	4	10	19	3	6	10	300	187	42	135	15	30	9	5	38	34	20	13	116	107	166	185	91	75	231	192	106	112	216	156	33	81	30	46	41	53
Ec-01_004960	3	3	14	14	14	19	16	22	0	0	1	284	329	68	186	14	12	6	8	166	94	4	4	147	99	43	75	69	65	83	93	188	276	108	219	41	42	36	77	101	137
Ec-01_004980	8	6	252	241	171	219	243	266	81	80	91	376	334	189	603	132	178	86	100	102	96	146	84	250	352	368	425	169	223	510	630	389	301	278	338	62	147	54	105	126	106
Ec-01_004990	30	38	479	627	356	476	740	555	321	417	242	676	754	389	740	451	218	287	320	369	378	286	236	942	944	605	845	685	862	562	588	788	785	472	831	211	121	138	280	195	312
Ec-01_005000	157	138	2056	2797	1902	1627	4467	3865	593	693	1307	6230	6414	2032	6155	1820	1978	1911	1681	2780	2747	1757	1310	2242	2432	5895	11315	1539	1392	6636	7978	6690	5132	4005	2442	552	2682	1290	1778	1457	1374
Ec-01_005010	333	273	452	739	490	355	567	629	104	143	107	1015	880	424	1137	242	194	186	217	324	316	355	296	562	779	848	1299	739	601	743	863	664	607	790	1030	141	170	159	324	241	259
Ec-01_005020	20	5	0	4	9	6	4	9	0	0	0	784	734	133	407	3	4	4	8	361	245	8	8	462	340	126	99	211	300	89	103	419	706	281	391	70	8	116	238	234	389
Ec-01_005030	22	19	191	305	217	819	1107	751	200	252	339	2803	2852	1575	3161	1000	737	756	661	649	797	842	678	1818	2309	1710	2115	1445	1588	1307	1634	1982	1625	1525	1801	269	721	382	511	404	495
Ec-01_005040	21	8	308	394	242	330	517	481	228	347	217	968	751	377	1040	365	389	208	241	396	458	245	154	834	501	1293	1819	673	913	1764	1958	780	734	859	736	224	420	326	517	458	830
Ec-01_005050	3	1	14	5	4	26	34	24	86	162	53	210	171	75	227	160	112	106	77	149	140	37	16	67	76	235	251	91	37	202	187	95	165	179	430	166	29	123	229	96	293
Ec-01_005060	61	44	186	207	106	279	493	284	543	551	423	2455	2650	2050	2869	847	572	744	833	746	1015	1029	894	1454	1724	796	952	1532	1360	995	1004	2168	2149	1742	2845	269	560	497	732	455	388
Ec-01_005070	83	71	904	1000	685	722	2023	1202	2009	1961	2105	5606	5709	3431	8774	2132	2423	1594	2079	3629	3748	2323	1641	3218	3090	7348	11968	2667	2977	9473	9683	7531	7289	5406	6836	1002	2451	2261	3849	3000	4066
Ec-01_005080	8	16	3	7	1	1	1	2	0	0	1	688	796	253	607	4	7	6	6	375	264	13	19	132	152	259	159	104	131	160	220	358	463	247	483	46	6	44	158	146	126
Ec-01_005090	37	37	279	367	257	349	712	491	303	329	402	2602	2949	1520	2746	528	550	609	726	643	690	688	593	1324	2013	724	891	2240	2124	1230	1233	2128	1966	1791	1831	231	482	423	742	391	518
Ec-01_005100	48	27	726	1247	752	730	1046	987	227	380	252	2316	1421	438	2031	515	1157	314	312	500	626	708	556	789	785	2597	3322	1696	1016	3651	4257	735	631	1691	749	332	1198	576	775	586	912
Ec-01_005110	61	52	914	1267	702	424	1048	867	242	277	445	1771	1406	969	2768	520	966	419	348	427	420	669	533	801	697	1643	2708	556	566	2440	2805	1371	1205	1172	1115	168	951	358	349	465	268
Ec-01_005120	1	3	42	79	53	36	37	63	26	58	23	296	254	45	102	6	0	1	13	62	48	7	6	127	114	38	43	64	85	55	42	99	194	73	95	22	27	27	42	35	43
Ec-01_005130	20	17	252	213	152	131	193	138	249	284	183	657	717	437	929	327	269	236	252	303	281	172	152	464	452	660	797	429	470	740	766	573	718	462	1520	277	255	170	370	225	452
Ec-01_005140	20	16	343	411	381	180	245	383	230	326	186	803	681	431	829	289	304	193	238	460	488	130	111	406	340	455	613	319	441	789	713	922	881	633	808	186	379	319	528	364	709
Ec-01_005150	91	59	1003	1209	817	792	1534	1067	870	1282	1053	1745	1567	979	2210	1340	849	1390	1252	1124	1109	728	541	1160	886	1906	2800	797	1096	1592	1852	1831	1937	1253	2057	712	319	443	1045	704	1193
Ec-01_005160	91	71	284	386	229	268	324	288	195	305	171	789	989	484	1015	234	245	265	284	385	375	225	201	380	453	810	877	269	278	658	677	781	748	626	873	163	248	162	273	158	167
Ec-01_005170	1	0	143	181	103	192	141	115	0	0	1	1	1	1	0	106	52	70	70	73	84	0	0	1	0	0	0	0	0	0	0	0	0	0	0	54	55	38	64	45	39
Ec-01_005180	6365	4958	669	1283	1200	1341	992	791	1001	1691	1591	1723	2654	1641	2729	732	785	825	1020	620	617	524	323	1033	735	574	323	978	1020	1252	1331	1001	1719	1287	3340	179	59	437	1022	864	1129
Ec-01_005185	8	3	390	721	630	766	604	439	19	31	25	110	88	38	148	58	31	43	50	25	32	33	41	187	159	332	385	196	196	250	263	273	193	113	127	56	25	29	48	28	31
Ec-01_005190	116	75	48	88	64	69	151	35	117	122	88	1905	2783	2032	3060	163	206	139	477	546	545	79	80	1182	1267	475	109	1311	1054	797	783	1478	2418	920	3103	197	26	518	784	495	796
Ec-01_005200	177	145	1661	1962	1185	1072	1955	1572	858	938	975	3063	2915	1203	3621	1086	1347	837	906	1421	1199	946	705	1827	1662	2841	4408	1474	1646	3923	4456	3249	3077	2714	3382	654	1309	916	1385	1405	1947
Ec-01_005205	0	0	10	17	9	10	6	5	0	2	0	0	0	1	1	0	0	0	0	0	0	0	0	2	0	3	1	2	1	7	3	1	2	1	0	2	3	0	1	3	0
Ec-01_005210	252	247	15	34	25	9	9	17	4	1	0	97	84	16	84	2	1	1	3	141	78	1	0	116	111	26	10	69	95	36	70	189	247	180	205	50	8	28	33	68	99
Ec-01_005220	71	62	277	311	169	704	1210	568	960	915	1093	3884	4184	3610	4849	1923	1126	1643	1742	1639	1679	1691	1242	6096	6695	1287	1648	5012	5928	3541	3207	4425	4810	2903	4804	873	995	1216	1745	1263	1123
Ec-01_005230	7	8	149	224	141	206	406	276	112	181	140	905	836	360	1269	165	286	171	171	350	382	251	182	214	310	791	1457	283	226	1378	1492	1058	832	944	953	76	221	230	323	305	258
Ec-01_005240	69	53	196	286	247	448	877	592	575	676	950	1617	1454	580	1832	749	948	554	622	1077	1025	567	404	1347	1250	2137	2814	1498	1493	4248	3948	1856	1976	1507	2018	367	833	1017	1340	1387	2171
Ec-01_005250	13	7	308	387	608	202	303	406	196	277	152	586	560	176	464	171	202	129	147	187	196	88	65	241	290	212	394	322	362	523	551	354	359	311	296	109	241	184	234	220	377
Ec-01_005260	24	20	203	187	115	181	325	258	207	236	180	516	501	195	504	269	117	200	228	264	311	186	112	556	591	484	515	692	641	497	501	673	559	399	451	200	188	127	212	122	174
Ec-01_005270	13	6	6	14	12	47	107	55	42	27	81	407	447	347	918	66	61	63	88	340	404	59	36	782	733	180	222	647	646	899	833	1514	1265	965	1797	140	107	196	418	230	430
Ec-01_005280	33	19	6	5	9	31	19	17	79	59	110	176	210	452	566	104	43	94	101	35	41	907	669	248	258	82	96	290	281	184	170	168	146	89	764	53	25	52	151	59	72
Ec-01_005290	5	1	0	5	1	6	3	3	1	0	1	256	233	52	124	1	5	1	9	125	88	8	4	128	110	60	22	64	111	41	45	117	227	122	93	12	10	18	50	43	62
Ec-01_005300	6	8	52	52	47	49	77	69	83	99	89	407	422	223	390	128	110	120	166	298	285	120	81	598	466	438	701	570	495	1074	1022	942	966	646	1273	190	233	211	403	250	543
Ec-01_005310	29	21	277	333	202	312	365	227	396	562	500	538	415	284	756	370	269	204	284	291	275	212	149	602	564	580	685	484	586	669	805	492	538	465	896	388	384	222	375	307	776
Ec-01_005320	92	70	523	550	499	200	227	358	262	433	272	468	547	343	770	346	217	253	248	299	306	215	150	401	341	358	361	366	525	560	525	720	839	307	1027	177	103	186	287	252	458
Ec-01_005330	22	14	32	35	27	14	21	20	9	28	15	80	108	79	122	38	28	19	31	41	33	26	21	35	26	35	41	17	36	101	80	132	153	59	233	10	8	5	17	10	16
Ec-01_005340	56	45	294	309	202	365	411	336	438	425	431	2941	3106	1760	3344	632	659	537	692	688	768	996	805	2486	2909	1404	1877	2646	3025	3466	3206	2841	3183	2292	4431	405	593	1034	1600	743	1333
Ec-01_005350	25	24	720	825	662	509	1244	1036	274	297	296	1569	1338	495	1906	581	853	497	409	589	581	502	353	428	336	1543	2801	336	395	1925	2082	1386	1014	1089	898	178	984	315	395	421	453
Ec-01_005360	89	63	484	295	365	359	777	550	944	852	1563	2589	3166	919	2488	450	1079	552	757	1050	1017	525	364	953	733	1034	1919	803	947	2478	2366	3033	3738	1961	3136	131	2069	1198	1396	1094	1413
Ec-01_005370	86	74	399	349	253	422	305	210	539	424	507	1297	1268	848	1294	418	366	282	277	293	325	661	582	1712	1878	1389	1381	1877	1795	1084	1128	1444	1295	953	1424	365	1101	364	375	322	110
Ec-01_005380	83	53	489	410	312	306	491	309	653	622	594	2032	1914	870	1993	593	696	480	506	735	710	671	466	857	700	1195	2413	683	785	2278	2404	2684	2774	1514	2095	175	1500	644	658	609	589
Ec-01_005390	23	22	2	8	16	2	3	3	1	2	0	1435	1604	533	1893	24	22	4	13	688	487	24	27	570	484	520	399	351	508	1186	1153	1092	1795	1768	2907	66	72	205	342	797	634
Ec-01_005400	2	5	1	1	4	1	1	4	0	0	0	380	473	156	535	14	4	2	4	192	126	2	8	192	170	264	142	115	201	273	303	269	363	334	698	56	18	52	130	201	343
Ec-01_005410	29	27	39	88	31	178	150	80	2	5	3	283	330	81	235	636	409	321	274	258	241	2	1	200	122	38	37	85	160	61	46	173	255	134	188	215	180	129	221	219	265
Ec-01_005420	2	1	80	68	48	149	276	170	604	726	446	1308	1015	635	1397	1066	1122	677	548	360	339	1421	1047	829	846	1026	1164	698	768	1459	1503	913	720	783	1359	207	442	185	316	349	505
Ec-01_005430	52	45	1041	1089	858	647	1047	870	158	285	308	612	546	203	737	354	157	413	397	483	492	189	128	515	378	549	677	264	365	237	340	437	558	385	533	175	158	145	246	199	223
Ec-01_005440	38	34	389	401	244	304	535	379	587	632	640	1248	1077	498	1256	534	703	505	554	775	755	354	237	523	447	933	1389	450	459	1595	1616	1254	1288	999	1645	203	782	438	618	567	837
Ec-01_005450	3	6	5	9	20	9	2	8	6	17	6	284	250	27	43	2	4	2	1	53	37	6	1	123	99	7	8	75	112	16	15	151	276	95	85	10	2	25	31	32	57
Ec-01_005460	22	21	8	15	23	11	9	8	1	5	2	1322	1409	286	1090	38	20	4	10	649	449	24	14	962	793	445	294	540	870	482	553	1068	1759	913	1618	164	50	218	394	618	906
Ec-01_005470	951	783	214	253	130	190	167	64	44	79	41	1412	2191	388	763	28	16	6	19	447	348	18	16	521	480	116	114	296	413	316	361	1058	2028	897	1217	36	14	162	216	343	327
Ec-01_005480	139	118	363	514	288	263	468	416	110	126	113	1014	865	366	1140	280	374	184	207	272	294	378	275	513	640	864	1105	600	559	1160	1055	591	563	647	800	150	266	171	263	149	379
Ec-01_005490	22	18	949	1076	716	614	1252	1258	261	296	325	1541	1431	524	1634	434	522	408	440	485	530	527	421	532	547	1246	2162	407	442	1452	1675	1049	908	897	1000	162	380	293	428	348	692
Ec-01_005500	11	5	40	35	33	97	131	90	102	149	76	464	430	215	577	240	107	135	181	198	202	142	96	264	361	287	348	359	386	337	340	359	438	345	526	107	56	79	171	116	182
Ec-01_005510	6	8	272	330	206	245	439	267	410	498	329	1032	984	556	1670	526	318	395	420	534	655	260	189	891	880	979	1290	892	1054	1398	1272	1122	1078	965	1387	332	522	263	371	452	811
Ec-01_005520	3	6	263	292	200	273	276	303	90	227	202	951	900	343	1016	227	462	237	277	548	405	81	66	127	103	444	1057	125	142	1069	1247	1220	1234	694	991	115	303	280	444	534	866
Ec-01_005530	10	6	400	392	311	272	397	419	173	379	375	1052	939	381	1237	388	556	309	357	555	476	167	131	352	249	636	1057	297	314	1092	1198	1219	1265	828	1089	254	487	346	479	513	1005
Ec-01_005540	20	8	834	923	656	524	893	901	772	859	895	1053	868	382	1493	702	748	538	576	655	673	367	287	988	807	1007	1100	944	1029	1020	1087	1193	1197	912	1065	572	926	455	749	635	1367
Ec-01_005550	108	88	1047	923	629	596	1171	916	430	528	843	1709	1808	1176	2456	868	844	867	853	856	827	415	246	1183	931	1024	1697	962	1251	2837	3016	2200	2133	1123	1701	554	820	1007	1320	909	1563
Ec-01_005560	220	165	547	659	358	687	1219	641	3559	2429	2080	42732	53737	25171	41595	1547	4010	3083	10612	10653	11871	4188	2852	11959	15802	13146	10597	19049	17745	79353	75980	54063	60281	32226	68113	4108	4523	20201	33349	15420	19451
Ec-01_005570	0	0	146	338	242	144	229	323	10	8	8	241	158	95	355	32	38	13	27	105	86	27	23	96	88	431	589	77	66	476	557	225	172	376	323	42	63	50	114	99	109
Ec-01_005580	69	55	1186	1603	1020	599	1717	1976	363	395	723	4917	5585	2650	6867	918	1689	1007	975	1591	1684	1743	1359	1046	1400	4266	7740	1121	1034	7212	8190	4911	4431	4344	5384	278	1220	1062	1668	1510	1485
Ec-01_005590	2801	2213	1381	2352	1975	1374	1521	1395	1204	2005	2224	1665	1722	564	1376	1197	1070	934	1069	1392	1233	295	234	734	564	1739	2784	563	760	2436	2883	1546	1544	1428	1023	414	2552	871	1003	1253	1771
Ec-01_005600	15	4	148	239	151	200	274	170	172	194	152	481	409	201	586	167	166	168	163	212	218	166	101	332	308	364	436	265	409	553	523	446	418	337	549	141	133	154	277	177	298
Ec-01_005610	4	8	194	248	152	145	217	199	133	159	96	238	199	119	277	150	98	85	127	183	173	96	83	189	193	295	344	172	182	279	307	224	300	229	411	109	60	86	159	117	123
Ec-01_005620	74	71	1261	1332	971	669	1198	1353	1335	1505	1255	3087	3054	1448	3310	862	1134	737	929	1233	1169	796	643	1356	1267	2276	3073	1184	1263	3380	3578	3097	2907	2629	3521	417	1193	854	1230	1200	1943
Ec-01_005630	36	21	730	1024	690	850	1548	1104	765	808	1022	2647	2477	1113	2778	2035	1018	1547	1243	925	890	1186	821	3257	3238	2042	2683	2328	2651	1769	1916	2390	1917	1257	1136	683	1101	428	518	530	574
Ec-01_005640	22	24	655	570	326	390	1098	564	885	1591	2157	1343	1112	580	2031	1801	1435	1807	1493	2064	1730	622	334	575	532	3264	5172	484	715	3035	3471	1513	1693	1554	1967	761	1476	985	1390	1545	2259
Ec-01_005650	1330	1043	2758	2534	1669	1457	2041	1517	1257	1748	578	1868	1889	157	449	1576	74	1739	1774	1778	1473	156	99	1048	1097	167	193	883	1160	307	290	1952	1979	491	903	342	90	277	1500	530	1438
Ec-01_005660	161	124	592	791	553	468	932	899	198	223	185	1172	1131	364	949	346	215	272	246	399	378	232	180	371	476	1267	1977	343	288	772	967	1113	841	670	450	179	268	117	225	205	199
Ec-01_005670	90	54	299	259	241	64	120	133	3011	2620	3144	4852	6343	4810	9825	5904	8079	7186	8489	4598	4171	4194	2407	4273	3070	1916	2460	3698	5663	9671	9124	7155	11159	4852	8342	1136	2473	4372	5647	3893	5957
Ec-01_005680	17	18	31	49	32	34	46	36	23	30	29	62	58	14	85	51	42	45	50	33	37	40	27	38	47	89	98	53	59	124	140	39	47	50	51	20	47	61	62	53	42
Ec-01_005690	228	191	180	298	157	367	272	177	420	279	442	671	801	340	743	305	216	182	216	178	229	283	223	924	1076	409	328	1127	992	364	395	556	488	615	615	270	264	144	167	155	56
Ec-01_005700	12	6	152	233	107	235	276	188	289	474	246	367	298	110	242	231	90	177	194	200	171	217	148	344	283	323	382	238	336	188	184	293	312	194	257	110	70	69	115	83	157
Ec-01_005705	7	9	231	150	100	180	235	131	233	310	328	198	142	78	281	487	260	272	249	262	264	203	116	488	363	179	189	417	611	239	214	139	173	123	564	352	95	130	315	158	248
Ec-01_005710	8	5	444	185	136	247	315	180	273	588	642	670	608	331	997	779	879	747	681	959	831	313	161	346	245	523	661	238	411	1112	973	595	824	441	2349	398	254	438	1050	595	1355
Ec-01_005720	93	65	858	929	664	710	1387	964	1595	1831	2769	4077	4151	1825	4624	1944	1856	1831	2015	2289	2241	1633	1135	1340	1423	2622	4087	1369	1492	4921	5045	4780	4778	3798	5496	562	1682	1580	2554	1680	2032
Ec-01_005730	6	6	10	12	23	9	8	14	6	3	6	15	42	12	45	6	5	2	3	11	6	1	5	26	34	11	12	25	37	11	25	28	31	16	32	0	3	3	6	3	11
Ec-01_005740	40	32	458	559	379	305	721	641	354	411	409	2290	2391	1203	2621	376	594	378	440	599	607	588	460	506	560	917	1363	618	553	1854	2096	1903	1931	1528	2355	135	414	441	730	600	1053
Ec-01_005750	14	7	463	641	416	518	1212	907	702	609	703	1238	1151	509	1696	965	718	772	789	955	961	292	149	1218	863	1488	2334	1010	1335	1905	2130	1657	1437	912	1249	724	1267	680	994	813	1320
Ec-01_005760	695	538	899	707	689	711	1586	885	1332	1318	1947	4795	6323	3078	4391	1481	793	2043	2310	2556	2746	1333	968	5341	4457	968	1738	3405	5240	2528	2178	8938	10116	2156	5817	647	570	1081	2486	1222	1515
Ec-01_005770	978	801	890	1332	1319	1137	1055	1103	965	1660	2821	1742	2125	994	2178	1680	939	1355	1627	1365	1270	372	242	2718	1384	1526	1258	1316	3496	1869	1992	2750	3246	1416	2175	962	1371	1009	1401	907	1584
Ec-01_005780	108	73	144	166	185	130	153	156	257	329	617	106	92	53	142	292	133	217	227	144	184	56	24	369	173	169	165	180	611	166	175	152	210	95	91	181	179	107	191	124	239
Ec-01_005790	85	76	2225	2841	1959	1212	2495	3485	603	1009	1642	5035	5009	2149	7069	1052	2060	824	880	1372	1363	1504	1166	1789	1823	2578	6025	1708	1513	5413	7172	4108	3356	3538	3983	570	1482	1123	1756	1829	2770
Ec-01_005800	81	58	357	442	233	303	536	389	285	414	250	497	601	384	643	468	201	340	332	232	242	306	264	894	981	505	549	873	887	346	412	497	535	312	469	144	107	112	174	169	162
Ec-01_005810	8	10	470	479	357	334	695	325	439	683	469	527	384	212	743	759	437	393	410	701	556	113	85	506	494	1311	1409	431	519	913	1140	457	441	438	542	465	533	324	568	626	1455
Ec-01_005830	27	28	313	373	296	209	298	264	183	233	201	806	737	410	972	363	418	351	345	350	386	410	340	373	441	518	674	415	427	691	733	676	700	660	661	185	220	249	374	339	503
Ec-01_005840	39	35	455	526	312	372	482	415	389	456	364	1138	1072	605	1152	547	422	430	447	413	474	426	328	601	760	604	703	690	720	653	683	1059	1022	587	1019	272	340	221	389	225	272
Ec-01_005850	0	0	0	0	0	0	0	0	0	0	0	0	0	0	0	0	0	0	0	1	0	0	0	0	0	0	0	0	1	0	1	0	0	0	0	1	0	0	0	0	0
Ec-01_005860	93	72	832	649	451	472	739	519	108	188	129	1894	972	449	953	213	612	232	189	588	573	204	133	148	214	1316	2248	175	150	2048	2638	758	1246	879	404	123	720	475	595	464	729
Ec-01_005870	185	163	1499	1113	723	731	1189	744	390	511	246	2263	1200	753	1429	483	624	319	230	361	508	497	430	679	1250	817	681	1422	795	545	701	935	1135	1158	462	471	1167	367	455	322	334
Ec-01_005880	9	2	286	361	219	154	323	256	179	223	113	335	281	163	416	146	258	76	141	184	177	127	80	121	90	293	514	170	176	549	581	240	288	259	287	66	282	94	150	108	175
Ec-01_005890	10	5	228	269	183	152	338	353	173	190	255	674	580	289	881	410	350	259	294	328	315	290	191	817	725	765	993	710	807	951	943	630	645	538	700	241	340	178	250	175	236
Ec-01_005900	30	19	252	279	192	213	364	223	282	484	385	648	664	424	1063	514	274	462	432	477	417	252	209	388	428	755	844	423	307	673	798	649	631	540	719	247	280	149	285	228	260
Ec-01_005910	7	8	53	37	31	34	53	43	11	42	26	106	137	93	189	70	49	64	71	113	89	26	34	34	38	99	159	31	19	137	151	130	161	121	156	33	34	27	52	41	55
Ec-01_005920	171	123	231	251	230	117	269	208	267	266	243	720	769	408	979	166	242	149	209	309	311	209	137	228	216	380	577	252	276	821	824	835	996	807	878	78	350	266	342	322	342
Ec-01_005930	14	21	23	18	18	113	132	60	91	87	68	762	837	161	441	70	24	75	71	223	182	42	42	484	610	218	163	472	506	226	241	590	786	567	643	112	41	112	148	165	251
Ec-01_005940	30	27	401	411	263	313	358	274	349	565	308	678	555	317	805	534	366	393	456	355	385	260	210	596	609	942	1073	691	719	1140	1229	566	578	474	674	375	360	193	332	239	465
Ec-01_005950	15	11	851	768	607	434	958	1154	260	227	348	963	964	397	1020	458	450	293	276	371	405	339	211	728	635	1224	1449	578	688	1091	1356	599	525	579	665	243	370	309	414	415	748
Ec-01_005960	1806	1428	187	711	717	613	296	355	56	89	122	676	625	292	817	323	330	177	146	566	446	62	33	392	235	1168	1252	174	334	1160	1298	619	577	704	409	198	611	293	266	359	487
Ec-01_005970	149	106	190	173	96	122	150	88	723	696	840	798	1103	588	1195	588	1061	559	614	548	538	430	265	611	371	1273	2221	250	579	1851	2123	1077	1100	1244	1339	248	1960	708	416	681	586
Ec-01_005980	7	6	34	44	17	51	44	19	9	5	6	577	463	63	169	27	8	11	8	179	136	5	4	342	204	74	61	170	215	36	71	189	363	116	123	51	11	52	107	87	177
Ec-01_005990	366	286	158	216	144	156	401	341	65	109	116	561	584	212	581	203	131	178	149	253	232	173	99	184	211	615	1081	171	126	559	635	562	530	436	350	78	158	72	117	80	107
Ec-01_006000	87	48	460	505	292	229	573	455	181	196	221	848	683	351	838	326	331	206	208	304	303	317	251	265	219	587	1190	178	180	639	677	626	599	618	633	69	366	151	159	216	100
Ec-01_006010	23	23	217	196	181	242	367	324	224	294	172	740	697	438	1002	507	195	400	344	284	326	314	236	736	898	603	786	841	857	448	463	691	646	506	644	202	181	136	195	146	127
Ec-01_006020	4	4	68	72	66	90	89	100	40	76	83	232	400	133	380	79	90	73	73	137	111	30	32	70	61	254	605	57	68	454	595	541	440	225	278	34	66	59	104	109	105
Ec-01_006030	20	24	289	411	294	261	441	500	277	364	448	744	951	401	1159	366	286	305	316	364	302	238	170	471	486	869	1199	379	421	871	1086	1238	1112	617	750	313	400	189	277	275	397
Ec-01_006040	33	48	315	417	262	324	510	394	426	537	410	4239	3305	2491	5044	1300	1263	1064	1150	1552	1513	1314	1018	1710	2117	2788	3026	2245	2125	6198	6774	4610	4714	4728	6763	1550	789	1643	2170	1313	1611
Ec-01_006050	6	8	54	53	26	59	63	64	52	81	24	232	226	118	265	64	57	50	54	101	94	64	47	192	190	179	232	144	156	201	175	155	189	167	229	62	45	37	78	66	79
Ec-01_006060	24	12	29	30	25	47	53	35	12	32	25	251	270	39	90	8	3	17	15	87	56	19	8	159	139	57	83	77	103	76	81	165	235	107	160	31	6	30	60	43	75
Ec-01_006070	288	208	3369	3124	2020	2116	5928	4107	4023	3648	4532	20676	22946	10279	22980	5892	5682	6276	5551	7433	7059	5962	4369	12619	10225	16949	29418	7052	7765	16244	17656	30395	26635	14432	17101	1788	7949	4468	6274	4995	4819
Ec-01_006080	11	4	93	123	81	175	167	127	52	81	63	410	428	186	520	173	120	163	183	166	146	123	94	290	295	414	446	277	286	425	426	471	371	308	337	114	202	98	136	106	107
Ec-01_006090	3	6	369	528	268	660	925	764	109	110	172	1133	1181	449	1289	484	411	386	304	449	428	344	263	426	553	1332	2304	436	348	1304	1503	891	712	753	581	195	376	111	202	204	220
Ec-01_006100	12	9	10	25	16	1	1	2	0	1	0	328	330	94	161	2	1	0	2	107	78	7	4	192	162	67	68	93	151	88	97	188	283	145	242	28	3	34	76	79	116
Ec-01_006110	115	81	3333	5535	3195	2619	5616	5894	608	1014	1766	9958	10318	4050	14779	2012	3966	2228	2195	3243	3143	3726	2911	1816	3098	12325	19735	2673	1896	16093	18072	8311	6158	8688	8435	765	2868	1948	2746	2819	3551
Ec-01_006120	0	0	1	2	7	5	4	2	0	1	0	0	1	0	0	0	0	0	0	0	1	0	0	1	0	0	0	0	0	0	1	0	0	2	0	0	0	0	0	0	0
Ec-01_006130	0	0	3	7	3	6	7	2	0	0	0	3	0	2	0	0	0	0	1	0	0	1	1	0	1	0	0	1	0	0	0	0	0	0	0	0	0	0	0	0	0
Ec-01_006140	175	128	314	325	271	191	359	301	266	316	390	721	991	371	785	176	370	272	268	418	380	132	95	88	94	427	831	97	130	1221	1253	769	781	761	729	66	353	307	391	397	634
Ec-01_006150	4	11	112	137	96	75	84	78	32	38	42	311	352	243	340	48	123	63	80	97	80	59	51	53	30	158	249	40	47	269	297	288	285	265	355	16	45	66	79	62	66
Ec-01_006160	60	52	47	31	23	36	32	12	3	3	6	403	339	3509	13897	164	2701	8	4	56	45	1688	1230	487	526	3318	4688	63	602	3150	3159	144	101	6666	9054	25	1258	784	25	976	666
Ec-01_006170	67	66	628	751	581	601	1007	895	406	514	419	2104	2288	1099	2435	820	444	729	801	732	753	516	397	1911	2016	1675	2331	1648	1892	2087	2137	2426	2399	1358	2059	556	500	344	751	533	868
Ec-01_006180	22	15	745	723	540	517	787	686	961	1130	519	2148	1654	672	1835	924	783	718	702	957	888	422	270	911	834	1315	1627	767	1024	1576	1774	2042	1945	1003	969	453	1157	457	649	661	940
Ec-01_006190	60	48	41	57	80	84	123	89	31	55	45	1207	1333	361	1048	61	44	41	46	712	564	31	29	492	324	493	603	244	376	588	698	944	1674	748	1014	139	196	196	323	437	583
Ec-01_006200	83	89	158	215	171	210	257	164	202	198	279	2087	2225	1591	1905	310	277	329	601	795	824	368	305	2348	2803	1029	1228	2706	2861	3683	3479	3479	3576	1949	5084	776	439	906	1635	740	557
Ec-01_006210	0	0	0	0	0	0	0	0	0	0	0	0	0	0	0	0	0	0	0	0	0	0	0	0	0	0	0	0	0	0	0	0	0	0	0	0	0	0	0	0	0
Ec-01_006220	776	598	75	105	106	56	53	76	7	6	10	456	341	154	652	62	83	59	51	232	209	36	40	356	287	537	1076	183	282	988	1179	886	798	590	736	57	167	78	105	114	72
Ec-01_006230	0	0	1	1	0	0	0	0	0	0	0	2	0	0	0	0	0	0	0	0	2	0	0	3	1	31	35	1	2	3	7	0	3	2	2	0	3	1	0	0	0
Ec-01_006240	1	0	8	13	12	5	4	5	0	1	2	1	0	1	0	15	8	3	5	11	7	3	0	7	5	0	1	4	7	0	0	0	2	1	0	14	19	6	8	9	2
Ec-01_006250	3743	3095	206	522	526	524	381	211	87	97	120	2680	2007	857	3068	552	378	265	270	843	932	373	392	3021	3386	4058	5219	2642	2587	3829	4167	3559	3036	3675	3888	827	1601	777	1072	1119	528
Ec-01_006260	13	25	47	61	27	49	52	39	73	50	45	240	254	129	288	87	72	71	100	75	91	76	70	278	422	72	52	422	602	122	109	149	164	179	286	171	95	61	94	73	26
Ec-01_006270	891	757	117	135	94	70	99	86	410	209	325	1219	2459	591	762	59	98	127	735	305	467	433	330	426	385	30	3	361	382	281	102	1901	2381	475	4267	329	112	174	617	130	371
Ec-01_006280	38	31	36	44	24	93	92	55	74	136	69	552	535	429	751	136	81	131	125	201	238	86	74	442	623	420	593	532	573	715	706	606	623	537	741	76	91	138	191	145	91
Ec-01_006290	9	10	96	129	77	63	86	113	73	94	83	349	320	170	405	86	114	50	57	75	95	91	39	233	198	168	213	251	235	407	431	186	245	226	235	47	76	124	205	113	128
Ec-01_006300	34	23	1379	1689	1212	655	1526	1878	311	561	834	4080	3637	1623	6373	813	1968	697	800	1286	1299	992	668	1101	799	3504	6672	827	849	5576	6930	3642	3156	2901	3518	481	1968	1108	1932	1564	1884
Ec-01_006310	6	3	61	59	40	60	75	52	74	117	52	603	656	299	790	262	175	188	251	355	305	182	131	264	437	546	491	377	387	719	695	575	533	751	922	164	164	162	279	236	276
Ec-01_006320	2040	1643	16284	15301	11890	13526	28347	23440	17079	16466	30630	64288	60208	26831	105929	22781	47898	24179	18690	30855	27232	29330	19895	38256	30357	121343	293833	18384	20683	156714	205585	77465	61952	62189	48041	10966	52461	22722	22203	31040	19940
Ec-01_006330	14	12	167	210	161	176	310	225	264	292	303	728	1167	627	1131	367	304	435	447	445	480	256	211	436	445	434	602	412	451	657	612	1164	1023	756	919	190	220	200	443	253	339
Ec-01_006340	6	6	80	107	89	152	141	101	68	122	63	259	262	118	324	137	88	126	104	114	90	116	78	197	177	247	264	192	179	224	258	209	213	168	218	57	38	55	93	36	35
Ec-01_006350	50	48	620	703	845	730	896	558	149	202	121	825	810	165	614	298	314	221	278	177	209	181	149	296	384	394	525	507	227	511	570	211	226	433	336	177	260	138	197	105	200
Ec-01_006360	56	65	106	135	60	116	126	42	633	642	154	227	309	60	164	111	88	83	85	84	96	82	69	115	117	179	173	191	124	115	134	150	240	156	197	56	22	62	139	49	72
Ec-01_006370	51	32	82	141	82	237	367	205	343	576	379	876	802	481	1012	433	202	291	334	464	403	235	180	712	695	700	746	766	713	767	897	1153	1323	793	1838	551	280	285	475	283	446
Ec-01_006380	52	40	767	636	537	639	1516	1181	3076	3098	1371	5129	4409	1993	7196	1965	2901	974	819	1231	1114	1787	1204	2512	1879	7873	15495	2314	2269	6844	7961	5510	4495	5144	3488	568	4105	1217	882	1578	1277
Ec-01_006390	9	11	320	502	289	465	785	608	188	266	190	1252	1567	753	1607	498	423	359	333	367	411	462	398	751	838	1133	1779	622	708	1013	1162	1186	978	940	900	172	281	213	234	258	308
Ec-01_006400	188	158	297	345	283	592	1064	806	308	354	566	3727	4025	1718	4680	1260	1200	1056	813	812	851	1105	814	2063	2230	2756	3827	1261	1256	2668	2986	3256	2773	2656	2194	376	1643	545	540	696	531
Ec-01_006410	81	48	380	507	236	402	606	378	329	357	355	2294	2688	1600	2399	407	428	310	393	440	505	677	579	1834	1998	1361	1771	2243	2208	2946	2774	2551	2547	1894	3607	230	451	477	626	404	263
Ec-01_006420	86	84	357	363	229	474	409	349	199	242	215	601	638	326	739	296	212	271	322	264	285	215	153	614	640	475	554	532	618	498	498	486	461	390	545	141	254	194	250	188	187
Ec-01_006425	12	15	481	383	262	243	503	462	58	90	73	649	724	247	638	200	174	127	112	152	159	165	122	204	242	357	566	249	272	528	543	419	423	327	582	38	190	84	122	80	110
Ec-01_006430	85	80	574	528	330	710	858	507	528	518	423	1376	1618	773	1574	508	419	481	561	503	572	476	363	582	642	695	985	673	490	1034	986	1339	1205	1017	1047	99	441	278	349	248	288
Ec-01_006440	237	210	15	24	68	41	43	42	14	25	19	2374	2201	252	857	22	19	20	23	249	166	15	8	334	325	194	130	226	224	1209	1033	1051	2078	2642	2092	39	109	451	275	916	438
Ec-01_006460	338	303	198	307	172	173	228	192	186	215	356	1015	1282	630	1143	238	263	288	269	367	375	104	70	423	417	608	1076	264	368	1254	1474	1240	1105	698	906	197	264	239	412	348	474
Ec-01_006470	534	449	232	272	155	280	325	236	515	666	586	1080	1361	668	1253	581	480	384	345	404	317	524	420	680	633	751	953	398	616	533	564	1124	1058	781	1028	255	351	170	282	199	263
Ec-01_006480	30	32	270	317	206	292	720	626	319	366	415	2822	3291	1425	3089	1100	580	893	756	860	915	972	768	745	937	1294	2457	667	596	1424	1661	2509	2340	1412	2013	252	288	325	703	368	631
Ec-01_006490	48	47	5	12	7	2	0	5	0	0	0	602	784	199	199	12	4	3	4	203	151	7	5	323	351	33	32	149	272	85	75	374	573	292	275	26	5	30	49	59	45
Ec-01_006500	14	10	136	196	150	202	401	297	121	134	120	1095	1232	505	1352	221	186	198	201	258	254	245	166	288	373	590	909	308	303	802	918	768	845	990	1035	62	309	223	279	302	353
Ec-01_006510	36	22	229	334	191	170	346	226	155	180	147	617	571	356	654	237	191	180	198	225	260	195	173	293	359	412	499	275	282	446	395	386	452	449	532	117	154	90	174	162	146
Ec-01_006520	36	36	133	194	76	182	226	108	109	141	79	411	674	387	755	176	103	146	148	114	147	162	163	369	503	276	349	400	476	368	318	535	532	355	760	80	43	50	79	55	57
Ec-01_006525	0	0	6	6	10	30	17	16	0	1	0	14	23	9	33	18	6	10	12	26	18	0	0	2	2	1	13	0	1	7	12	14	22	21	65	27	10	15	20	42	29
Ec-01_006530	3	2	29	34	37	38	79	51	35	34	29	191	186	93	204	71	30	45	53	80	82	44	41	139	149	131	175	126	146	135	152	196	192	213	217	42	25	40	69	79	68
Ec-01_006540	6	1	113	118	75	140	183	135	154	169	108	660	528	174	657	232	236	182	176	254	285	180	135	201	267	524	742	304	246	883	835	446	456	627	640	63	382	205	220	167	213
Ec-01_006550	515	400	255	310	176	151	198	171	159	300	198	501	723	559	1372	540	223	651	669	500	483	294	193	403	683	279	269	563	398	235	236	951	1333	277	1880	284	103	119	429	207	334
Ec-01_006560	24	12	146	130	116	47	152	133	126	150	269	490	490	256	663	493	410	296	305	371	332	201	132	619	325	686	830	358	448	970	1084	347	636	468	672	259	528	108	179	128	239
Ec-01_006570	4	2	32	41	23	18	19	21	62	89	70	94	101	40	116	88	65	56	50	45	42	24	19	52	27	72	73	34	32	71	76	53	62	49	138	36	60	22	37	31	52
Ec-01_006580	33	38	402	303	204	183	233	161	711	961	752	597	632	231	598	1215	699	447	546	380	350	211	122	504	437	611	668	370	471	662	670	343	435	326	835	459	526	116	245	227	580
Ec-01_006590	1872	1476	18645	17043	17100	11554	36648	30365	11426	9003	17173	66253	85926	43769	91447	6144	18883	8519	8308	17055	17261	14847	11578	24720	22387	63384	123056	20354	32154	143864	162300	128530	143202	49591	104961	3602	18529	18471	33974	28557	50287
Ec-01_006600	177	135	5	29	44	15	7	10	2	3	2	357	376	101	555	15	11	2	7	266	188	6	5	228	175	280	197	146	203	244	313	302	465	288	812	62	7	72	215	398	699
Ec-01_006610	1	1	1	1	1	3	4	2	0	0	2	93	121	27	51	0	1	1	6	41	25	0	1	49	32	26	29	18	36	34	36	47	107	48	64	6	1	10	26	26	32
Ec-01_006620	21	20	61	69	31	207	173	121	109	139	79	224	458	124	218	103	54	65	96	97	90	73	61	431	312	201	285	179	262	131	97	352	318	151	332	27	22	15	97	48	61
Ec-01_006630	186	164	134	165	156	105	188	173	92	123	59	164	189	44	145	79	121	57	75	124	107	56	34	32	38	232	370	40	51	379	409	174	185	174	168	15	146	82	95	115	150
Ec-01_006640	29	11	171	304	169	122	257	233	53	73	47	327	259	126	253	81	137	37	58	89	100	135	75	204	205	404	453	258	219	415	489	179	180	228	211	61	119	66	114	87	65
Ec-01_006650	4	5	3	4	8	3	4	3	0	1	0	618	665	170	604	2	16	0	3	202	144	8	7	147	75	175	118	71	124	259	298	255	676	412	1260	24	14	136	313	422	520
Ec-01_006660	44	27	4	4	15	34	31	17	13	40	25	415	494	217	503	34	10	12	29	264	191	6	9	432	232	87	82	146	345	141	190	481	765	346	503	68	18	56	110	167	230
Ec-01_006670	15	16	38	34	38	52	110	42	61	80	48	687	781	231	480	47	56	83	99	222	291	61	41	176	196	155	216	139	184	281	265	574	774	386	552	37	102	94	155	123	165
Ec-01_006680	278	249	314	604	358	452	506	322	232	227	156	1522	1520	717	1451	378	309	297	302	462	522	315	270	478	572	876	1099	658	603	1552	1597	1400	1474	1249	1859	145	409	402	538	470	408
Ec-01_006690	1709	1445	72	146	142	103	69	77	18	32	14	232	290	141	224	53	52	28	52	85	82	27	25	130	62	157	269	56	85	235	309	207	229	234	320	22	24	51	72	63	61
Ec-01_006700	535	448	337	482	262	358	540	220	187	236	524	522	637	259	566	193	207	218	225	165	241	253	206	590	521	301	440	600	489	312	341	417	702	251	1822	97	69	84	228	83	100
Ec-01_006710	7	5	297	298	176	259	447	285	108	140	127	583	732	208	601	226	162	220	245	240	207	165	140	226	292	478	726	232	228	656	706	502	490	361	513	108	90	77	125	83	157
Ec-01_006720	1540	1234	10094	20837	11272	24324	33080	21927	46262	64297	30095	81712	83299	78193	126057	72272	42997	49227	50196	34091	38010	48126	34879	129532	116254	119161	123806	95607	103324	114078	93804	72282	73962	53726	79550	24425	29548	15772	22951	15128	14951
Ec-01_006730	13	12	43	76	54	136	293	159	116	154	195	863	852	387	1002	333	188	296	317	360	390	251	189	688	651	608	951	662	636	713	711	791	828	580	755	140	149	144	319	226	412
Ec-01_006740	627	514	1000	725	639	449	981	795	606	675	1303	2053	2495	1181	2464	654	513	1135	1201	1140	1063	657	479	634	737	775	1319	637	698	1331	1317	2702	3346	1327	3307	154	362	504	1030	626	1091
Ec-01_006750	0	0	1	0	0	2	0	0	0	0	1	0	0	0	1	0	0	0	0	0	0	0	0	0	0	0	0	0	0	0	0	0	0	1	0	0	0	0	0	0	0
Ec-01_006760	9	9	89	163	267	253	385	427	105	154	1256	514	501	223	592	177	148	101	83	250	190	108	88	1398	1142	451	453	1123	1622	514	537	497	508	459	527	175	78	225	285	375	749
Ec-01_006770	9	10	81	91	103	147	259	206	141	107	119	855	827	347	797	150	307	120	114	147	179	163	141	443	570	415	518	529	540	534	543	758	739	588	500	56	375	131	111	157	127
Ec-01_006780	6798	5860	6291	5530	4364	3827	6292	4464	4257	3178	9288	7565	9937	6368	8872	3326	3056	3791	3835	4285	4121	1982	1633	13768	11017	6469	5970	11736	14090	10058	9701	9860	10206	4961	8066	2521	2687	4013	5772	3376	5064
Ec-01_006790	2	3	633	523	564	538	739	597	0	2	1	5	8	7	8	287	340	359	374	593	544	0	0	1	1	2	5	0	1	19	12	6	12	3	10	96	184	326	453	272	341
Ec-01_006800	19	21	217	318	178	242	387	323	223	277	175	1012	1251	466	1189	372	280	326	308	446	452	317	195	1528	1832	551	798	2003	2708	775	866	1428	2093	706	1953	290	251	471	779	375	613
Ec-01_006810	463	340	299	339	242	308	414	282	240	315	204	870	815	357	889	402	297	314	342	380	328	332	254	677	579	712	967	546	550	913	979	706	811	519	822	206	206	176	255	232	304
Ec-01_006820	14	12	65	123	59	340	250	217	219	278	200	2220	2012	403	887	330	60	150	158	873	630	48	31	1127	846	864	876	438	643	304	424	1239	1526	757	949	363	174	237	450	369	759
Ec-01_006830	12	10	130	145	77	86	123	100	80	125	76	499	414	160	454	116	121	73	92	94	98	134	90	89	118	84	95	100	83	121	135	245	273	190	257	51	44	38	48	52	31
Ec-01_006840	76	71	485	642	352	333	440	363	245	368	290	1173	1071	648	1416	393	424	316	274	431	427	290	229	443	465	970	1080	459	432	1170	1205	927	817	951	1214	328	302	236	408	398	642
Ec-01_006870	60	44	703	891	598	554	797	684	603	872	712	1545	1142	647	1981	874	895	607	504	634	677	609	417	1066	935	1688	2280	864	722	1627	1941	1134	991	1214	1483	522	684	554	796	614	1059
Ec-01_006880	135	99	150	146	137	62	56	50	188	143	72	1287	1100	274	861	64	374	21	53	103	86	214	179	398	399	543	732	267	487	1060	1016	717	737	1187	671	10	1431	416	139	306	163
Ec-01_006890	17	8	4	7	11	5	8	5	11	22	16	304	258	62	113	2	0	3	2	68	49	1	5	236	143	53	40	107	168	23	32	146	195	57	118	34	1	21	72	47	71
Ec-01_006900	0	1	0	2	1	0	1	1	0	3	0	17	14	4	14	0	0	1	0	2	3	0	0	12	6	1	0	1	9	1	2	11	26	8	15	0	0	0	2	3	2
Ec-01_006910	7	6	2	7	10	10	4	4	5	2	1	194	225	32	73	0	1	2	0	58	41	3	2	106	53	20	26	27	52	4	6	95	198	61	95	24	0	17	36	38	44
Ec-01_006920	10529	8625	321	617	842	355	544	492	35	69	96	661	1140	177	452	212	143	55	38	189	177	54	33	141	146	144	163	174	168	176	250	263	332	460	262	51	36	77	81	162	288
Ec-01_006930	138	125	683	735	499	410	621	385	492	740	588	1194	1458	1029	2081	748	305	882	901	880	873	519	370	875	816	507	579	872	898	632	642	1771	2062	709	2088	487	84	255	890	423	531
Ec-01_006940	31	27	299	398	191	348	466	305	170	243	140	1106	1065	450	1184	423	354	352	451	338	420	359	286	385	550	566	720	594	383	1007	881	685	672	852	1162	130	204	185	286	160	74
Ec-01_006950	92	42	359	398	289	312	351	277	324	510	320	1058	725	292	943	586	543	323	349	572	500	216	131	524	445	1051	1352	371	469	1272	1448	774	893	694	760	261	792	351	488	425	676
Ec-01_006960	1101	822	2294	1787	1619	1253	3438	2345	3174	3253	2958	8075	9148	4160	8059	2105	1880	2936	3317	4268	4009	1727	1220	2756	3089	2687	4994	2801	2973	4836	5212	10356	10855	5143	6863	826	1442	2510	3734	2790	4369
Ec-01_006970	0	0	0	0	0	0	0	0	0	0	0	0	0	0	0	0	0	0	0	0	0	0	0	0	0	0	0	0	0	0	0	0	0	0	0	0	0	0	0	0	0
Ec-01_006980	104	68	666	1236	807	551	845	887	341	402	831	2398	2733	1676	4049	481	785	461	458	848	971	766	549	4297	2549	1824	2671	2085	5340	4222	4241	3445	3095	2530	3976	310	696	683	1030	970	1943
Ec-01_006990	27	28	397	916	391	464	545	440	102	192	106	1261	1144	560	1529	301	434	309	298	285	389	487	450	310	602	1354	1673	680	425	1920	1905	583	420	1036	824	111	360	191	230	128	101
Ec-01_007000	3199	2395	2077	1792	1580	1701	4437	2294	1302	2253	2329	5162	6729	1742	4049	4017	469	5157	4776	6017	5163	504	297	1491	1743	1819	3062	1421	1392	1327	1688	7544	6859	1702	3216	1104	168	740	3115	1257	2418
Ec-01_007010	250	186	1000	1149	796	621	934	912	825	1122	626	2176	2045	1137	2496	762	939	490	589	889	884	517	357	1006	890	1629	1879	942	1212	2305	2501	2098	2159	1712	2317	423	959	695	1100	1131	1829
Ec-01_007020	10	6	58	108	63	95	74	67	59	122	69	289	249	124	321	147	84	83	89	104	103	93	56	177	238	185	275	211	182	243	291	243	212	221	276	70	77	56	94	59	76
Ec-01_007030	30	33	617	878	550	387	425	617	184	331	192	609	403	157	597	168	252	86	96	203	211	133	105	254	223	874	1013	237	180	677	844	319	302	471	357	165	401	139	224	229	254
Ec-01_007040	5	4	0	1	2	5	0	1	2	0	0	349	304	74	178	7	2	0	1	110	95	6	4	81	103	37	57	52	68	47	96	124	176	84	201	20	3	12	48	36	84
Ec-01_007050	8	3	0	3	10	3	5	4	0	0	0	373	250	482	801	23	13	1	2	125	75	25	16	77	98	108	100	38	84	332	396	137	255	482	662	31	21	74	137	225	202
Ec-01_007060	11	6	232	260	129	264	406	333	62	94	39	620	544	206	839	169	144	83	110	232	191	157	121	192	291	455	648	257	156	656	707	721	716	605	620	100	270	75	130	207	163
Ec-01_007070	2	8	45	55	30	41	60	62	50	76	28	334	342	110	326	73	63	47	70	132	93	30	27	87	127	122	112	71	86	318	413	242	321	414	399	63	72	69	105	131	147
Ec-01_007080	140	128	610	533	345	326	645	494	398	405	507	1133	1408	697	1388	354	318	513	516	612	592	548	384	426	416	683	1042	441	530	838	958	2022	2523	861	2037	141	229	266	542	395	446
Ec-01_007090	3	5	120	107	64	161	263	161	201	260	236	598	440	283	656	554	229	306	303	316	344	250	161	659	680	335	474	573	689	378	424	409	650	413	693	312	173	225	433	248	571
Ec-01_007100	5	5	843	1367	845	1187	4026	2797	303	475	795	3616	2906	910	4098	1401	1609	1495	1123	2028	1852	898	521	1315	921	7937	14144	807	687	6433	7557	3082	2477	2151	1440	296	2479	494	810	1087	1091
Ec-01_007110	15	8	269	336	224	338	347	242	314	456	375	1122	791	460	1137	554	503	503	496	623	627	242	158	556	531	630	745	586	566	957	897	956	945	735	1150	411	287	446	732	555	913
Ec-01_007120	5	6	244	314	213	347	496	320	169	199	141	646	588	234	697	216	164	213	227	274	278	222	148	297	344	422	463	389	289	440	439	458	471	400	632	114	167	133	190	137	148
Ec-01_007130	26	15	333	288	304	568	663	488	143	189	131	1230	1519	501	1239	155	152	155	175	223	278	117	110	462	637	251	462	533	390	608	494	1342	1320	691	765	62	139	147	181	150	225
Ec-01_007140	32	18	56	32	18	242	334	47	160	242	77	216	289	284	579	39	5	147	183	266	294	23	21	271	202	147	105	82	160	95	115	283	317	152	561	45	14	23	57	71	54
Ec-01_007150	35	16	458	373	220	358	439	322	392	580	275	1035	879	285	1003	393	198	288	331	275	298	236	172	829	1194	425	480	1222	1202	880	817	1618	1442	369	727	239	90	94	189	108	150
Ec-01_007160	22	17	93	102	79	163	328	149	172	226	191	855	638	320	1039	579	229	297	258	497	442	133	111	705	592	941	942	586	761	952	1017	656	730	796	926	300	198	276	460	597	883
Ec-01_007170	46	52	349	365	264	375	566	347	148	278	206	869	1668	1101	1620	592	99	911	815	534	503	329	268	393	679	364	482	455	346	275	315	1228	1394	370	1544	151	27	83	339	157	164
Ec-01_007180	69	46	556	963	656	687	1179	1328	258	346	358	2635	2813	1400	3059	833	692	793	779	639	652	766	636	1386	1694	1301	2109	904	1207	1632	1846	1835	1458	1452	1218	119	631	290	327	298	186
Ec-01_007190	111	86	811	809	694	656	899	745	720	1043	796	1393	1378	746	1987	1378	805	1079	917	1075	926	424	287	554	530	1300	1841	473	629	1362	1487	1599	1456	935	1142	485	351	517	832	663	1301
Ec-01_007200	6	8	20	23	18	68	87	63	66	101	199	470	653	335	546	140	244	266	268	132	136	91	52	107	139	59	59	191	158	210	210	240	262	231	464	34	18	125	183	86	157
Ec-01_007210	2	3	49	40	31	44	66	112	51	69	268	388	338	228	398	133	218	157	167	90	150	128	78	162	150	119	107	260	174	278	256	132	141	169	267	61	25	129	209	91	160
Ec-01_007220	4	3	31	11	14	17	27	36	17	34	79	251	272	165	248	30	79	55	60	55	46	40	39	26	39	88	76	47	28	178	191	77	94	124	189	8	12	62	93	58	56
Ec-01_007230	38	38	332	172	110	118	210	177	838	1224	1523	2700	2425	2201	2929	1085	2472	1441	1447	1110	1287	643	511	862	754	975	970	854	885	3083	2675	1214	1545	1432	2856	253	497	1763	3175	1425	2186
Ec-01_007240	1679	1337	10482	23085	11947	25137	37262	22183	30897	56660	19193	90710	91508	89011	136916	70065	47968	44449	49034	28079	32152	47053	34956	137506	124519	56573	63515	103203	103412	71552	52951	71887	71904	54124	76904	26994	30485	9831	15508	10483	15992
Ec-01_007250	16	18	341	373	284	208	487	330	232	292	495	1434	1263	553	1569	338	366	321	342	641	609	457	367	492	603	1285	1773	498	516	1641	2002	1421	1624	1255	2633	294	497	425	1046	725	1017
Ec-01_007260	10	6	247	232	207	173	429	367	174	202	135	545	420	194	558	199	231	149	182	218	211	178	109	183	142	266	491	134	163	510	542	472	562	388	413	44	431	197	192	247	218
Ec-01_007270	3	0	132	107	68	233	204	126	103	85	132	122	86	54	159	173	105	138	90	130	157	77	39	214	213	95	70	283	285	219	205	135	149	104	213	211	266	146	206	151	304
Ec-01_007280	4	2	57	79	46	40	85	116	52	62	24	284	275	157	424	59	96	73	80	198	185	58	40	111	74	172	312	95	110	702	708	499	448	407	547	48	152	178	306	209	272
Ec-01_007290	6	7	19	23	10	20	20	11	0	2	0	364	386	92	258	30	27	13	22	173	133	4	5	243	132	87	83	89	154	121	184	197	352	204	505	78	24	68	109	149	112
Ec-01_007300	9	5	1	2	1	1	0	1	0	1	0	454	395	81	217	3	0	1	2	69	51	3	3	142	125	37	31	76	112	45	65	164	267	156	234	7	0	19	50	56	32
Ec-01_007310	80	53	80	96	65	61	52	53	41	96	56	136	214	64	169	38	48	50	46	59	56	28	11	68	54	101	153	37	92	110	100	179	210	112	160	22	105	52	62	40	76
Ec-01_007320	369	330	388	469	400	309	314	300	202	382	268	809	804	307	826	368	283	276	307	287	317	182	134	484	445	611	701	432	579	657	603	935	919	530	727	237	534	152	212	168	157
Ec-01_007330	53	53	36	71	41	33	25	20	28	61	25	46	48	17	58	18	7	15	11	6	6	11	17	33	21	22	26	28	33	18	16	22	16	24	39	17	12	7	5	5	6
Ec-01_007340	1	1	13	28	25	23	14	18	1	1	1	189	192	16	55	4	7	3	2	73	47	1	1	165	77	44	24	48	110	21	22	95	134	51	57	25	0	18	43	28	69
Ec-01_007350	57	38	435	433	304	277	874	697	509	521	564	2886	3162	1684	3633	479	806	633	646	1162	1237	726	555	1273	1066	2424	4066	740	1002	3984	4480	3104	3050	2552	2625	248	600	787	1061	953	839
Ec-01_007370	49	28	388	547	281	239	375	284	227	274	238	1246	991	351	1046	264	388	182	205	290	282	304	260	451	542	701	938	463	454	1119	1220	823	756	966	1168	113	421	301	286	300	318
Ec-01_007360	12	6	84	112	78	124	173	123	104	111	111	303	376	189	359	100	83	88	103	97	120	120	93	335	370	333	297	334	327	270	284	319	271	320	318	54	83	55	99	55	55
Ec-01_007380	4	7	229	350	179	339	615	452	76	125	118	902	951	375	926	291	249	257	232	310	308	217	225	295	472	928	1447	303	275	567	756	677	500	595	504	96	280	80	139	106	118
Ec-01_007390	853	680	17	96	34	41	26	16	6	5	1	1972	2444	507	1284	39	12	7	16	818	558	20	9	1078	751	430	286	569	940	564	618	2134	2961	894	1241	301	125	282	497	502	1097
Ec-01_007400	23	13	13	8	3	45	44	2	13	6	7	307	418	186	642	2	17	4	7	160	115	5	5	156	161	180	122	97	213	323	345	310	449	466	883	52	55	61	150	239	347
Ec-01_007410	5	7	34	26	27	11	22	22	29	15	20	361	462	351	318	19	26	28	50	65	77	29	22	129	137	157	247	193	227	579	631	841	753	372	562	29	110	88	91	68	74
Ec-01_007420	65	66	305	272	221	234	328	234	539	479	311	3987	4412	2371	4333	356	499	470	877	1007	963	455	385	1621	1756	1459	2135	2323	2546	5412	5530	8327	7529	3771	4463	502	1662	1448	1526	1137	1384
Ec-01_007430	11	9	122	157	95	135	154	82	333	253	136	923	837	353	884	129	83	120	177	159	164	199	128	845	913	340	270	1175	1291	707	659	1610	1346	701	745	151	534	272	315	255	304
Ec-01_007440	2796	2361	1080	1770	1291	367	820	927	70	63	48	797	825	359	779	66	60	79	78	755	641	52	50	479	668	636	845	396	501	671	788	1888	1952	768	1066	269	297	306	336	442	572
Ec-01_007450	103	99	282	380	245	278	456	308	166	303	195	1241	1124	639	1873	319	278	258	267	265	275	329	303	464	617	765	846	397	603	1029	959	720	710	1208	1651	68	231	276	233	249	239
Ec-01_007460	88	52	253	246	212	152	208	204	234	306	242	398	320	153	507	349	291	225	263	331	300	134	74	215	155	385	448	129	195	488	520	263	297	331	461	154	161	133	188	193	269
Ec-01_007470	81	63	2649	3144	1723	3408	6582	4407	2237	2623	4486	11282	12637	3949	10505	4188	3747	3849	4406	4235	4745	3271	2405	5705	5771	7463	12722	4437	4316	9971	10695	10272	9487	6321	5293	1243	3706	1942	2793	2658	2373
Ec-01_007480	99	86	365	445	277	442	783	477	369	378	647	3239	3984	2185	3800	937	647	1109	1046	1122	1197	811	623	1806	2111	1428	2256	1795	1980	2327	2327	3635	3813	2031	3568	466	391	505	1278	651	659
Ec-01_007490	122	87	604	644	394	481	604	373	540	618	403	1450	1653	1397	2616	785	400	592	611	635	652	495	374	1442	1723	880	733	1583	1772	1004	1065	2051	2082	1172	2445	586	233	437	898	580	786
Ec-01_007500	22	16	317	268	200	161	274	175	140	250	169	555	657	538	1038	229	268	287	300	529	416	126	71	230	196	396	608	174	264	845	993	855	1120	459	871	138	102	264	514	416	777
Ec-01_007510	6	0	38	46	56	42	56	37	35	68	38	171	197	101	225	87	54	61	74	81	77	69	39	98	141	270	283	112	98	245	221	165	141	148	248	58	51	30	63	39	31
Ec-01_007520	12	7	55	49	36	37	37	20	16	30	14	533	505	150	274	21	8	6	7	208	105	17	14	314	222	102	79	124	202	71	99	285	506	171	713	29	13	59	116	87	173
Ec-01_007530	3	11	59	49	51	81	97	65	48	104	74	206	199	70	179	30	28	34	41	94	78	37	31	158	167	198	314	112	134	163	160	284	237	205	240	64	49	51	67	51	54
Ec-01_007540	50	31	637	513	1044	774	1216	889	419	398	413	1280	2456	750	1358	254	339	284	456	307	416	354	297	1432	1416	580	804	1214	1014	1209	1330	1279	1650	817	2341	261	240	202	339	202	218
Ec-01_007550	655	529	3405	3539	2723	1558	3170	2414	2195	2558	1927	10463	12503	5963	10907	3000	2056	2992	3254	3064	3448	3323	2527	5811	6688	5496	6948	6105	6100	8371	7917	11359	11490	6320	12136	1045	2157	1407	2256	1471	1344
Ec-01_007560	34	30	510	682	465	475	461	462	296	455	269	720	712	317	743	433	224	309	292	338	282	186	130	470	518	704	751	373	427	604	662	465	482	478	503	276	199	152	249	198	263
Ec-01_007570	80	53	1378	1775	1189	1187	2175	1812	779	960	1183	4956	3790	1815	5178	2051	1599	1526	1339	1398	1426	1309	912	2123	2411	3739	5376	2068	1852	3971	4242	3522	3094	3065	3379	996	1705	1090	1475	1337	1393
Ec-01_007580	12	14	12	29	18	17	7	12	5	7	10	708	804	350	1180	22	11	25	18	214	190	11	13	310	419	288	218	271	473	864	690	701	1192	1488	1899	79	54	174	266	546	499
Ec-01_007590	16	12	452	432	296	293	505	346	317	572	188	921	1004	491	1386	761	445	739	735	799	776	588	379	384	427	1510	2308	382	326	1297	1469	1103	1158	677	1513	297	137	248	492	291	582
Ec-01_007600	30	19	7	17	19	6	3	8	1	3	1	746	785	250	572	8	6	5	8	291	222	13	5	280	288	134	94	192	219	141	182	393	610	415	749	46	9	80	124	159	180
Ec-01_007610	205	156	1098	1734	1047	1028	1605	1326	418	489	393	2274	2209	933	2606	384	669	373	401	463	571	709	574	635	777	1714	2766	732	666	2031	2050	1596	1433	1526	1643	96	678	352	401	342	393
Ec-01_007620	1	1	6	19	14	4	11	26	4	4	7	317	221	119	352	5	5	1	1	39	23	2	2	73	102	94	54	88	84	286	261	101	174	458	437	14	26	53	52	187	100
Ec-01_007630	1877	1515	674	714	605	616	532	433	389	476	354	2851	2237	1351	3301	518	676	625	612	1080	1139	491	375	1883	1428	1590	1805	1675	2004	4762	4310	4107	3962	2720	4791	856	2017	1615	2197	1318	2040
Ec-01_007640	4	5	3	7	11	1	9	7	0	2	0	820	1028	211	428	18	6	6	5	283	173	7	9	275	227	153	85	94	188	68	105	465	739	238	209	43	4	68	116	139	217
Ec-01_007650	133	96	13	42	29	9	13	15	2	1	1	1922	2236	260	684	19	17	11	13	442	310	15	15	631	588	113	118	371	542	632	630	1371	2753	1776	1456	61	72	331	280	678	610
Ec-01_007660	113	89	796	871	587	523	920	737	271	452	270	964	969	352	1019	468	542	390	320	381	370	346	243	411	391	734	1247	353	493	1101	1262	730	820	538	832	153	318	315	419	327	582
Ec-01_007670	17	14	2	4	5	2	0	4	0	1	0	419	500	94	201	2	2	4	5	152	99	7	3	274	239	90	47	134	201	75	61	245	396	205	308	12	3	30	50	72	56
Ec-01_007680	20	15	4	7	11	17	8	9	0	2	2	1056	1074	84	172	11	2	7	7	114	87	5	2	496	338	32	23	183	285	88	107	430	713	537	315	50	11	142	132	166	170
Ec-01_007690	23	16	165	180	160	244	448	277	271	303	292	1773	1539	943	2326	489	470	486	490	855	874	506	439	968	1159	1148	1476	1254	1073	2093	2030	2307	1796	2045	2308	485	475	764	1185	755	1073
Ec-01_007700	357	274	1022	1203	794	825	1342	1141	402	453	501	2280	1941	1053	3069	684	983	477	461	618	680	1043	890	1593	1643	3313	4619	1557	1468	4097	4648	2289	1753	2046	2025	409	1528	565	661	504	332
Ec-01_007710	0	0	0	0	0	0	0	0	0	0	0	0	0	0	0	0	0	0	0	0	0	0	0	0	0	0	0	0	0	0	0	0	0	0	0	0	0	0	0	0	0
Ec-01_007720	88	73	316	378	149	219	451	369	2620	2026	1323	6830	9344	6974	7415	698	1834	1170	3948	4725	4869	1212	960	1845	1979	5193	7548	1996	2176	32491	29705	11656	11549	6606	15032	781	2446	5484	9683	5091	10983
Ec-01_007730	21	24	8	9	5	8	11	3	12	5	8	45	90	64	139	40	8	19	19	19	30	33	27	137	243	34	26	183	259	30	29	49	42	46	86	35	26	22	32	41	5
Ec-01_007740	191	144	153	144	147	87	119	103	285	225	215	890	1028	437	1029	283	165	223	210	225	241	187	152	327	437	423	411	296	573	455	524	926	929	595	972	139	245	178	281	172	312
Ec-01_007750	36	26	320	423	287	290	540	355	612	690	401	1493	1751	794	1687	585	328	457	545	744	774	533	409	779	794	1158	1990	642	871	1794	1685	2135	2014	1719	2506	214	503	312	682	467	888
Ec-01_007760	86	72	972	1368	842	1329	2265	1707	1633	2825	2947	6030	5694	2033	5432	6189	1977	6742	5152	2138	2051	2802	2137	2798	3136	2242	3212	2362	2473	2188	2557	3754	3049	2165	2451	715	951	521	820	669	439
Ec-01_007770	58	53	418	546	325	422	429	387	175	251	218	905	710	249	777	237	303	212	216	179	178	314	259	433	460	615	751	428	449	949	941	818	537	490	389	94	402	151	154	164	113
Ec-01_007780	0	0	1	0	0	0	0	0	0	0	0	0	0	0	0	0	0	0	0	0	0	0	0	0	0	0	0	0	0	0	0	0	0	0	0	0	0	0	0	0	0
Ec-01_007790	9	5	1	1	11	1	1	4	2	5	3	488	593	146	467	18	9	7	8	168	149	9	7	469	495	171	113	311	424	229	229	412	526	429	501	63	37	61	113	191	215
Ec-01_007800	358	291	345	341	219	485	598	364	534	456	346	2228	2190	1526	3183	600	930	408	369	463	522	827	614	1880	1890	1222	1867	1246	1467	1964	1950	1777	1999	1891	2005	210	1015	574	395	585	271
Ec-01_007810	659	537	1988	2588	1433	2413	3772	2681	1011	1180	2157	7623	7842	3351	9227	4620	3047	3955	2904	2981	2947	2955	2312	5894	6036	8351	13098	3510	3990	7682	8861	6208	5065	5220	4397	1500	3711	1285	1670	1648	1260
Ec-01_007820	63	49	158	363	196	162	302	234	69	115	54	926	680	295	835	169	171	115	139	195	247	168	132	348	553	597	885	580	610	832	896	569	506	744	524	140	304	137	204	156	153
Ec-01_007830	38	30	290	407	203	301	319	305	236	274	174	706	632	366	843	359	237	201	238	247	241	225	172	651	768	572	651	704	734	664	765	621	635	536	747	198	209	162	223	179	230
Ec-01_007840	47	41	925	924	604	713	1258	1594	286	399	457	2323	2130	935	2585	474	620	416	374	772	654	499	453	862	916	2899	4050	804	879	2655	3275	1827	1559	2023	2216	383	710	455	589	652	759
Ec-01_007845	35	29	61	53	64	39	50	57	41	88	42	2833	2661	500	1063	75	33	42	60	777	542	46	39	966	865	406	353	516	681	301	322	1339	2131	801	930	186	53	240	519	465	856
Ec-01_007850	115	103	333	336	203	391	505	277	296	352	303	1236	1202	792	1545	482	389	336	423	643	662	512	358	1900	1451	862	1132	1359	2258	1603	1382	1529	1683	1120	2503	337	351	278	438	333	450
Ec-01_007860	31	36	251	265	156	191	308	241	892	886	447	1359	1401	849	1510	641	579	605	741	782	775	351	253	765	707	908	1129	770	917	1261	1396	1492	1650	892	1498	300	628	589	1004	562	932
Ec-01_007870	31	35	298	319	159	242	445	296	382	483	189	1522	1663	756	1356	420	257	335	399	579	661	265	219	644	836	1777	2953	858	747	1375	1482	1576	1379	1141	1671	162	274	187	370	228	452
Ec-01_007880	0	3	21	15	34	47	22	24	65224	69833	9467	1004	271	27	8	5478	6474	197	1991	283	291	209	137	740	836	19980	61640	4454	2993	3	0	114	89	1007	121	31	68	123	504	117	23
Ec-01_007890	21	21	556	907	509	428	533	612	293	375	345	954	588	313	1044	282	404	273	237	429	410	243	185	701	688	1172	1368	772	676	1410	1695	633	665	717	886	349	374	294	574	490	933
Ec-01_007900	0	0	0	0	0	0	0	0	0	0	0	0	0	0	0	0	0	0	0	0	0	0	0	0	0	0	0	0	0	0	0	0	0	0	0	0	0	0	0	0	0
Ec-01_007920	161	107	531	444	337	210	381	312	386	449	380	806	513	208	805	401	606	401	453	438	430	348	203	222	196	523	816	194	319	1064	1305	664	854	551	1225	108	411	324	413	355	250
Ec-01_007930	32	32	453	583	334	423	619	492	235	252	343	1192	1018	576	1537	543	395	373	390	308	333	537	417	907	1106	1159	1206	1085	868	986	1185	1009	769	984	1065	360	265	156	314	253	275
Ec-01_007940	68	63	302	454	260	375	683	417	284	379	236	1590	1953	1117	2049	459	254	423	433	519	548	556	438	861	1043	822	1066	828	794	1208	1093	1413	1644	1534	2704	127	140	330	579	477	515
Ec-01_007950	23	20	254	408	279	193	389	392	183	328	194	885	1013	560	1372	235	173	235	222	395	341	279	185	310	365	494	736	370	301	655	712	923	804	729	1026	171	57	167	359	270	396
Ec-01_007960	42	32	73	74	53	225	240	166	58	70	43	590	622	109	195	72	2	58	62	276	236	18	7	510	423	106	133	362	337	96	132	675	869	249	442	176	18	79	251	133	215
Ec-01_007980	9	5	15	53	53	42	39	46	0	2	5	937	1089	260	607	5	18	1	7	301	212	9	8	742	335	216	124	185	374	124	194	781	1142	310	713	81	10	105	197	277	369
Ec-01_007990	11	6	290	467	278	303	594	590	137	164	232	1595	1309	460	2009	367	791	301	324	402	369	576	370	396	514	1185	1743	545	484	1915	2015	821	792	1010	936	113	443	288	317	330	371
Ec-01_008000	53	46	402	416	237	341	501	265	521	779	478	1036	807	361	867	734	443	450	415	805	701	214	154	867	655	1194	1335	588	727	969	1093	815	864	592	770	509	408	352	556	618	1251
Ec-01_008010	4	8	49	65	35	58	211	42	87	189	220	858	770	334	1043	190	296	149	163	394	367	216	126	336	347	1116	1582	297	328	1547	1937	762	914	944	1314	194	480	271	440	466	539
Ec-01_008020	20	10	3	11	10	1	1	6	2	5	4	929	910	150	474	11	5	3	7	283	172	8	9	271	207	140	144	93	223	251	296	536	1054	496	876	30	27	121	205	311	397
Ec-01_008030	29	26	157	240	174	135	236	255	304	340	656	2560	3175	1309	3071	1202	849	2273	2003	953	1043	1146	796	1148	737	1117	1698	491	1232	2161	2261	1906	1673	1304	1548	277	184	415	713	349	292
Ec-01_008040	87	64	2609	3189	1777	2515	5195	3651	1034	1043	2781	9196	8080	3989	14831	3388	5010	3676	2707	3139	3036	3300	2299	4740	4125	10518	17210	2791	3376	10725	12144	8570	7262	7639	4485	815	5986	1810	1765	2556	1626
Ec-01_008060	22	20	530	840	437	500	773	607	184	258	201	1255	1169	550	1573	339	306	219	234	269	293	540	445	745	900	957	1067	907	744	1243	1145	985	961	991	1067	203	277	160	217	186	267
Ec-01_008050	64	37	331	461	281	217	480	342	83	103	190	336	375	218	733	128	184	101	103	147	169	193	130	391	271	218	288	259	454	364	405	407	468	554	296	65	137	96	114	114	87
Ec-01_008070	1	2	51	47	78	20	141	165	3	13	14	391	214	144	378	25	170	33	18	21	39	102	75	27	47	34	27	31	10	41	37	6	46	48	35	1	3	78	96	63	44
Ec-01_008080	2	0	30	25	10	84	116	70	57	72	55	269	292	119	362	112	111	95	81	120	140	108	80	152	168	256	374	186	152	282	349	289	233	211	295	44	75	87	139	98	136
Ec-01_008090	0	0	0	0	0	0	0	0	0	0	0	0	0	0	0	0	0	0	0	1	0	0	0	0	0	0	0	0	0	0	0	0	0	0	0	0	0	0	0	0	1
Ec-01_008100	20	12	73	98	59	139	154	99	122	110	132	1583	1302	588	2006	158	338	131	141	297	247	234	190	348	432	625	943	309	335	1116	1159	758	666	1415	1036	52	434	277	202	391	247
Ec-01_008110	6	11	11	15	15	17	40	33	19	31	23	663	469	184	548	104	101	72	75	86	92	91	77	349	483	362	466	268	346	468	566	258	221	424	305	39	76	84	59	85	77
Ec-01_008120	20	16	110	94	70	98	107	81	88	138	50	222	181	72	210	128	131	84	84	112	102	82	59	97	99	262	342	96	134	426	411	136	157	158	334	48	53	56	171	79	129
Ec-01_008130	0	1	2	1	11	13	10	7	2	6	8	136	135	26	84	3	4	2	4	54	41	2	0	88	80	42	39	60	73	51	75	74	148	75	114	22	13	26	45	47	95
Ec-01_008140	17	8	305	331	303	189	350	381	1021	1272	218	280	228	66	232	330	325	161	209	262	208	76	34	110	75	217	316	86	84	240	243	262	278	247	158	73	244	129	160	202	374
Ec-01_008150	8	4	70	85	78	47	78	67	114	230	29	144	105	30	95	81	92	25	33	72	68	20	15	32	20	94	200	15	31	122	124	128	139	99	95	22	41	32	58	45	66
Ec-01_008160	21	11	97	168	104	63	103	73	2448	4688	524	459	372	162	353	239	125	98	114	181	195	64	56	296	287	245	278	388	333	111	108	234	334	349	623	190	88	80	134	121	216
Ec-01_008170	7	3	10	16	6	15	17	10	1	8	5	469	417	43	75	5	1	5	4	163	95	5	2	160	95	23	11	56	86	21	35	163	325	128	96	25	5	47	77	67	137
Ec-01_008180	168	153	1223	1222	892	1442	3481	2526	2161	2395	3102	14849	15027	8169	19920	2458	4027	2986	3548	6739	6434	3394	2299	4972	4743	11833	23180	4747	5160	22700	24331	22437	21393	14499	18187	2110	5412	5553	9585	6461	7854
Ec-01_008190	487	401	239	319	272	228	358	327	428	496	375	1027	943	424	961	523	443	499	546	457	464	348	228	497	424	603	962	492	578	1342	1447	847	911	658	932	231	365	358	552	370	710
Ec-01_008200	109	65	487	425	529	291	502	512	473	441	1209	1799	1762	982	1695	439	419	627	823	1099	1077	584	421	858	563	421	589	520	617	1237	1056	1848	2353	1550	2622	149	351	636	994	643	899
Ec-01_008210	495	383	788	966	619	542	836	594	462	615	607	1424	1296	814	1867	997	677	697	622	603	604	504	322	2031	1850	1062	1251	1777	2175	1188	1292	1374	1737	915	1270	526	437	433	601	490	686
Ec-01_008220	33	33	196	325	185	217	239	173	160	229	170	481	594	236	620	173	155	154	160	236	283	185	128	607	543	353	416	495	594	652	617	561	658	388	935	165	199	123	216	100	172
Ec-01_008230	72	77	796	932	647	583	1043	815	783	1144	1188	4117	4310	1963	4758	1016	1222	1133	1212	1758	1602	1171	865	1250	1336	4131	6098	1320	1263	6356	6982	4989	4833	3906	5896	672	1432	1093	1822	1337	2195
Ec-01_008240	24	14	186	235	171	371	637	323	287	319	501	1321	1362	682	1583	786	211	509	493	656	591	319	255	1229	1359	1323	1623	1266	1111	1041	1119	1753	1631	991	1516	309	183	234	561	489	527
[truncated: 16,372 more rows]
