# Supplementary material for: Life-cycle-related gene expression patterns in the brown algae
Source: bioRxiv preprint, doi:10.1101/2025.04.25.649966, version 3 (2025-08-12)
Supplement: Table S5 [file 649966_file24.xlsx]

## Sheet: TableS4_Complete_gene_info_Ecto
Gene information					Trancript abundance in individual RNA-seq samples (normalised counts calculated by DESeq2 using the median of ratios method)																																									Gene expression modules
locus_ID	ORCAE functional description	Manually-assigned functional category	Orthogroup (Ectocarpus species 7 vs. D. dichotoma comparison, Table S7)	TAP or EsV-1-7 domain protein	pSP_Ec32_gametes_Rep1	pSP_Ec32_gametes_Rep2	pSP_Ec32_gametes_24h_Rep1	pSP_Ec32_gametes_24h_Rep2	pSP_Ec32_gametes_24h_Rep3	pSP_Ec32_gametes_48h_Rep1	pSP_Ec32_gametes_48h_Rep2	pSP_Ec32_gametes_48h_Rep3	pSP_Ec32_2 5 cells_Rep1	pSP_Ec32_2 5 cells_Rep2	pSP_Ec32_2 5 cells_Rep3	pSP_Ec32_immature_Rep1	pSP_Ec32_immature_Rep2	pSP_Ec32_immature_Rep3	pSP_Ec32_immature_Rep4	pSP_Ec566_immature_Rep1	pSP_Ec566_immature_Rep2	pSP_Ec32_immature_basal_Rep1	pSP_Ec32_immature_basal_Rep2	pSP_Ec32_immature_upright_Rep1	pSP_Ec32_immature_upright_Rep2	SP_Ec17_mixed_Rep1	SP_Ec17_mixed_Rep2	GA_Ec460_female_immature_Rep1	GA_Ec460_female_immature_Rep2	GA_Ec602_female_immature_Rep1	GA_Ec602_female_immature_Rep2	GA_Ec457_male_immature_Rep1	GA_Ec457_male_immature_Rep2	GA_Ec603_male_immature_Rep1	GA_Ec603_male_immature_Rep2	GA_Ec32_male_immature_Rep1	GA_Ec32_male_immature_Rep2	GA_Ec32_male_immature_Rep3	GA_Ec32_male_immature_Rep4	GA_Ec32_male_mixed_Rep1	GA_Ec32_male_mixed_Rep2	GA_Ec602_female_mature_Rep1	GA_Ec602_female_mature_Rep2	GA_Ec603_male_mature_Rep1	GA_Ec603_male_mature_Rep2	WGCNA module assignment (colour)	brown module membership (MM) score	salmon module membership (MM) score	turquoise module membership (MM) score
Ec-00_000010	Ferric reductase, NAD binding	Metabolism	OG0000033		0	0	1.27694	1.12909	0	0	1.5762	0	4.81692	5.02424	2.47088	0	0	0	0	0	0	1.86945	2.2462	3.74019	2.92276	0	0	0	0	0	0	0	0	0	0	0	0	2.18935	0	3.48116	4.51713	0	0	0	0	NA	NA	NA	NA
Ec-00_000020	hypothetical protein	Unknown	OG0019314		0	0	1.27694	0	1.43994	1.97463	0	1.21034	0	0	0	0	0.811408	0.845388	0.736313	3.46723	0	0	2.2462	3.74019	1.93405	0	0	0	0	1.90929	1.45678	0.812953	0	0	0.83311	1.92615	1.38623	1.33694	1.08863	3.7225	3.87637	0	2.07619	0	1.02048	NA	NA	NA	NA
Ec-00_000030	Ankyrin repeat-containing domain	Membrane function and transporters	OG0019315		3.3074	0	2.39774	3.93041	2.97312	4.09731	3.79513	3.52499	2.13694	3.15146	2.81935	3.04837	3.0958	3.5056	4.16838	3.84928	1.1857	2.65715	2.58314	3.93217	3.50394	1.94186	1.53617	2.49076	2.6444	1.68033	0.522295	2.65481	1.61018	2.48105	2.29502	2.32209	2.54642	3.27025	3.0894	3.92919	3.4033	3.6318	2.66937	3.1352	3.73802	NA	NA	NA	NA
Ec-00_000040	tRNA Ile	Protein synthesis	NA		0	0	0	2.18955	0	0	0	0	0	0	0	0	0	0	0	0	0	0	0	0	0	0	0	0	0	0	0	0	0	0	0	0	0	0	0	0	0	0	0	0	0	NA	NA	NA	NA
Ec-00_000050	expressed unknown protein	Unknown	OG0019316		0	4.49436	4.48212	4.93924	4.8283	5.23374	6.25379	5.47117	6.30671	5.28959	6.34473	6.11133	6.01772	5.72215	6.14814	6.61828	5.92867	6.40256	6.2693	7.1472	7.24286	5.9232	5.41972	5.31999	5.4269	7.25355	7.42265	5.55965	5.76489	7.38576	7.37078	6.64693	6.60035	6.64673	6.24296	6.71015	5.65162	6.47431	6.95786	7.49247	8.06842	blue	0.611787	0.232464	0.173635
Ec-00_000060	hypothetical protein	Unknown	OG0019317		0	0	0	0	0	1.97463	0.993432	0	0	2.30532	1.33033	2.15218	1.86482	1.76139	1.87328	0	1.8276	0	1.80579	0	1.93405	0	0	2.79514	2.6444	0	1.20709	2.81853	2.69475	1.16987	1.35786	0.848085	1.77438	0.59332	0.808298	2.82785	2.97141	1.39397	2.07619	1.84612	1.6122	NA	NA	NA	NA
Ec-00_000070	telomerase reverse transcriptase	RNA modification or binding	OG0000514		0	0	1.27694	1.12909	2.61807	4.32529	3.5729	1.85911	4.41885	4.06791	4.37085	2.83278	3.21788	2.53119	3.80584	3.14146	3.90901	2.65715	1.16871	2.93679	2.73173	4.05581	2.26318	4.50992	3.68008	2.28059	2.73792	3.33366	4.17852	2.48105	2.29502	3.0358	2.89836	3.02184	2.72979	3.48116	3.4033	2.5568	1.65288	1.84612	3.35858	NA	NA	NA	NA
Ec-00_000080	FAR1 DNA binding domain	Transcription	OG0019318	TAP	0	0	1.94355	1.75464	2.97312	0	0.993432	1.21034	0	2.92054	2.0105	4.33191	2.25539	3.28751	1.22146	0	0	0	0	1.94599	0	1.27561	0	1.21426	1.85845	0.633432	1.20709	0.812953	1.90196	0	0.475874	1.13761	1.93523	3.10948	1.70196	1.60093	0	2.5568	0	2.29071	0	NA	NA	NA	NA
Ec-00_000085	lncRNA	Unknown	NA		0	0	0	0	1.43994	1.30166	0	0	0	0	0	0	0	0	0	0	0	0	0	0	0	1.27561	1.53617	0.731276	0	0	0	0	0	0	0	0	0	0	0	0	0	0	0	0	0	NA	NA	NA	NA
Ec-00_000090	expressed unknown protein	Unknown	OG0019319		4.23263	0	5.54052	6.41434	5.84629	6.9887	6.07449	5.77797	6.56152	6.57934	5.97954	2.98002	4.04229	4.08193	3.83979	3.46723	1.8276	3.538	4.20738	3.3937	4.43891	3.78545	3.83811	5.19557	5.33602	2.43563	2.99635	4.93146	5.32212	2.8579	1.11921	4.18605	3.30403	3.02184	3.57187	5.15249	2.35214	3.1922	4.34351	3.66436	3.20613	grey	-0.454076	-0.302732	-0.384004
Ec-00_000095	lncRNA	Unknown	NA		0	3.55699	2.39774	2.52327	2.97312	1.97463	3.89461	3.94983	3.48477	4.46128	3.09981	4.02778	4.36653	5.2944	4.87289	4.61309	3.78108	3.96316	4.20738	4.57436	4.08637	3.01882	3.39248	3.82804	4.93284	4.22033	4.17099	5.00131	5.32212	3.88255	4.56463	4.21742	4.60894	4.45004	4.7703	5.51521	3.5788	4.24093	4.62004	2.63008	4.43108	NA	NA	NA	NA
Ec-00_000110	Ammonium/urea transporter	Membrane function and transporters	OG0019320		7.86043	8.0781	8.75571	9.19548	8.8777	8.65265	8.7715	8.91651	7.98967	7.81008	10.0618	7.53527	7.72536	6.31973	6.55808	7.91476	7.62432	7.4166	6.87128	6.30347	6.06241	7.7615	7.20279	7.63206	6.6832	5.13658	5.37748	7.16268	7.14243	6.40504	6.25582	7.14384	8.04919	7.33766	7.18582	5.2327	7.13543	7.26709	6.09919	6.84792	5.99422	blue	-0.679292	-0.568743	-0.513221
Ec-00_000120	Hypothetical protein	Unknown	OG0019321		9.92344	10.0302	5.62616	5.66854	5.50907	5.39313	5.1165	5.63271	6.36735	5.77833	6.47325	6.36687	6.52897	6.83464	6.31429	4.54564	6.45421	6.10171	6.33769	6.17644	6.21632	6.80527	6.89257	5.67717	5.47028	5.82467	6.13672	5.51259	5.65162	7.06509	7.11017	6.69786	6.55773	6.86392	7.59745	5.63811	5.9359	6.86528	6.78627	6.74695	6.30693	green	0.0564892	0.180553	0.319442
Ec-00_000130	Hypothetical protein	Unknown	OG0019322		6.34159	6.76415	6.11512	6.17458	6.22232	6.81186	7.94689	7.96192	6.98569	6.55937	7.03624	8.21934	8.26621	8.04399	8.05366	7.52598	6.82243	8.08587	7.99076	8.41156	8.49658	7.37362	7.14586	7.02659	7.37324	7.25876	7.59204	7.18537	7.01083	7.91528	7.62609	8.54168	8.79843	8.10699	8.55822	6.25239	7.23053	8.27003	8.81473	8.18822	9.23289	brown	0.672114	0.271244	0.513991
Ec-00_000140	BRCT domain	Unknown	OG0000738		8.85732	8.34024	9.49703	9.17192	9.34487	8.30379	8.66986	8.69657	9.82979	9.77311	8.9594	6.72107	6.16918	6.29066	6.90928	8.3047	7.91842	7.66319	7.8728	8.06222	7.85426	6.76813	6.40277	7.7069	7.50943	7.75112	7.42996	7.54239	8.13732	7.21422	7.34327	7.03362	7.18436	6.98473	6.79984	8.85355	8.68503	7.74327	7.70013	7.89767	8.83499	midnightblue	-0.641562	-0.141011	-0.521872
Ec-00_000150	Ankyrin repeat-containing domain	Membrane function and transporters	OG0005650		4.79178	5.05783	3.78756	4.32159	3.87821	4.92137	4.89417	5.081	3.24728	3.35047	2.0105	7.31714	7.13994	7.274	7.34415	4.23908	4.41925	2.93259	4.20738	7.25891	7.26949	5.58175	5.54244	7.55313	7.63863	8.13178	7.7727	8.2786	8.12676	8.81688	8.86903	7.66553	7.46695	7.91357	7.67903	8.5513	7.90169	8.10068	8.12825	7.57333	7.38915	turquoise	0.648989	0.788477	0.827174
Ec-00_000160	Methylthiotransferase, N-terminal	Metabolism	OG0006757		7.07143	7.43724	9.31559	9.30514	9.49969	8.65789	9.50649	10.0063	7.34357	7.60137	8.19633	8.10365	8.16739	6.68627	7.54527	7.65959	7.67918	8.27697	7.95492	8.29844	8.23359	7.58056	7.68808	6.53535	6.46468	7.44827	8.36217	6.24648	6.1032	6.96761	7.30456	8.00357	7.66351	7.35569	6.5159	6.76513	5.96779	7.39818	8.55165	7.83346	7.91086	brown	-0.595269	-0.49563	-0.421958
Ec-00_000170	expressed unknown protein	Unknown	OG0019323		0	0	0	0	0	0	0.993432	0	0	0	0	0	0	0	0.41463	0	0	0	0	0	0	0	0	0	0	1.07211	0	1.32976	0	0	0	0	0	0	0	0	0	0	0	0	0	NA	NA	NA	NA
Ec-00_000180	Protein of unknown function DUF963	Unknown	OG0019324		0	0	0	1.12909	1.43994	3.96821	3.89461	2.92022	0	0	0	0	0	0	0.41463	3.95704	3.11244	3.69406	3.28344	0	1.93405	0	0	0	0	0	0	0	0	0	0	0	1.77438	0	0.460032	0	0	0	0	0	0	NA	NA	NA	NA
Ec-00_000190	hypothetical protein	Unknown	OG0019325		8.5838	8.13447	7.24664	7.58602	7.60421	7.81484	6.70121	6.79921	7.35859	8.03638	7.62862	6.51914	6.58109	6.5457	6.88915	5.80139	5.95855	6.86351	7.08529	7.11787	6.96735	4.94678	4.57306	4.7051	4.46005	5.1811	4.27217	4.85807	5.32212	4.50241	4.30426	6.77367	6.74846	6.1226	6.37938	7.79856	6.40062	5.54176	4.62004	5.53661	5.53163	lightgreen	-0.556901	-0.325956	-0.293329
Ec-00_000200	ATPase, V1 complex, subunit H, C-terminal	Membrane function and transporters	OG0019326		11.4443	11.4406	8.12171	7.89029	7.98199	8.08772	8.42982	8.31728	8.47623	8.26314	8.46102	8.92475	8.93942	9.20017	9.19804	8.85021	8.97512	9.20823	9.14247	9.18268	9.1547	9.65081	9.80431	8.48695	8.85347	9.15035	9.29933	8.91613	8.65351	8.90729	8.81248	9.22082	9.09304	9.13993	9.0036	9.00398	9.64186	9.42288	9.70607	9.00078	9.02073	green	0.217658	0.249679	0.321925
Ec-00_000210	Cyclin-Y	Cell cycle	OG0003184		12.2626	12.1122	10.0861	10.2931	10.3265	9.6403	9.44012	9.67873	9.74948	10.1149	9.92461	9.64429	9.16772	8.46744	9.10079	10.5961	10.5836	9.52383	9.3471	9.30486	9.32725	10.1448	9.91636	8.63802	8.21162	9.40969	9.66837	8.68365	8.87364	9.59049	9.61917	9.40406	9.51672	9.77895	9.50354	9.90191	10.1665	9.7327	9.47343	9.43057	9.1673	red	-0.505101	-0.217215	-0.316099
Ec-00_000220	Hypothetical protein	Unknown	NA		0	0	0	0	0	0	0	0	0	0	0	0	0	0	0	0	0	0	0	0	0	0	0	3.35635	0	0	2.01923	1.32976	1.90196	0	0	0	0	0	0	0	0	0	0	0	1.02048	NA	NA	NA	NA
Ec-00_000230	conserved unknown protein	Unknown	OG0019327		9.26464	9.4083	5.58398	6.31027	5.06818	4.84987	4.23546	3.68092	9.1424	8.63151	9.129	8.81009	8.33696	10.0626	10.1413	8.89832	9.53454	7.62491	7.67554	7.68943	7.51918	10.1248	10.476	10.2285	10.266	10.4733	10.2653	9.70301	10.4954	10.1116	10.0434	8.58891	8.66569	10.4895	10.5923	9.45639	10.3532	9.88205	7.95828	8.93345	8.9831	lightcyan	0.708979	0.413499	0.422592
Ec-00_000240	expressed unknown protein	Unknown	OG0019328		8.77178	8.92372	7.79184	7.41592	7.42885	6.79292	7.37062	7.79272	7.72584	7.90015	8.15092	8.11763	7.86037	7.5067	8.06267	7.48156	7.72336	8.20743	8.27278	8.51644	8.55185	7.58056	7.16509	0	0	0	0	0	0	0	0	8.51826	8.11995	8.49043	8.0043	9.00398	9.16602	0	0	0	0	lightgreen	-0.339027	-0.508659	-0.380401
Ec-00_000260	Protein kinase domain	Cellular regulation and signalling	OG0019329		4.79178	3.55699	0	1.75464	0	2.43173	0	0	1.4325	0	0	3.34861	3.33043	3.28751	3.16848	0	0	0	0	4.39034	3.50394	1.27561	1.53617	5.22133	5.08012	2.10685	2.01923	3.71247	4.60088	1.80728	1.56257	4.15399	5.19009	4.06782	3.47774	2.34107	0	4.11103	3.79365	5.22243	4.79407	NA	NA	NA	NA
Ec-00_000270	Hypothetical protein	Unknown	NA		0	0	0	1.12909	0	0	0	0	0	0	0	0.467569	0.462012	1.76139	0	0	0	0	0	0	0	0	0	2.10452	2.91943	0	0	1.32976	0.752151	0	0	0	0.489014	0	0	0	0	0	0	0	0	NA	NA	NA	NA
Ec-00_000280	Hypothetical protein	Unknown	OG0019330		4.79178	0	2.39774	3.21885	1.43994	2.43173	1.99014	3.15114	0	0	0	0	0	0	1.99878	1.69398	1.8276	0	2.2462	4.01936	2.73173	0	0	5.38979	5.95556	4.5267	4.97896	6.18778	5.9678	4.67704	3.98631	5.94036	5.67333	5.09028	4.64597	5.30868	3.4033	2.9092	3.55128	2.90463	1.6122	salmon	0.225241	0.821683	0.511508
Ec-00_000290	hypothetical protein	Unknown	OG0019331		3.3074	0	0	2.18955	3.49551	2.43173	1.99014	3.35014	1.4325	1.21055	1.33033	1.10322	1.52973	0.845388	1.41402	1.08252	1.1857	0	0	3.51868	1.93405	2.39589	2.74432	2.31053	2.09853	0.633432	0	3.79345	3.5788	0	0.83311	2.07054	1.93523	5.36417	2.13098	4.66679	2.35214	2.5568	1.65288	1.20016	1.02048	NA	NA	NA	NA
Ec-00_000300	hypothetical protein	Unknown	OG0019332		0	0	1.94355	1.12909	0	1.30166	0.993432	0	2.13694	3.15146	2.47088	1.87949	0	0	0.41463	0	1.1857	0	0	0.964221	1.52649	3.01882	4.01809	2.79514	3.75215	3.21238	2.01923	3.62668	3.4033	2.24785	3.26254	1.76567	0.853573	0.59332	0.808298	0	1.24404	0	1.05124	0	0	NA	NA	NA	NA
Ec-00_000310	hypothetical protein	Unknown	OG0002586		0	3.55699	0	1.75464	1.43994	1.97463	0	2.64517	0	0	0	3.99352	4.16878	3.93936	4.02822	1.08252	0	0	1.16871	4.51559	3.91708	2.74071	2.74432	5.14264	4.86945	3.93852	3.57361	4.31615	5.08094	3.88255	3.75535	4.41973	4.1977	5.11166	5.1969	3.92919	1.90196	4.47015	3.67755	5.6528	5.12695	turquoise	0.595872	0.692036	0.879001
Ec-00_000320	Glutathione S-transferase	Redox	OG0019333		10.5123	10.1444	7.16315	7.31197	7.52591	7.86103	7.43812	7.59121	8.87641	8.2065	9.52275	11.0945	11.468	11.7922	11.4924	9.6859	9.54934	11.9301	11.7984	10.6349	11.0901	11.4521	11.3072	11.077	11.2457	10.9392	10.7691	11.5545	11.4718	11.5403	11.38	10.6732	11.1243	10.893	11.3993	9.86778	9.75358	11.6291	11.554	10.5863	10.1067	brown	0.836266	0.409159	0.59372
Ec-00_000330	expressed unknown protein	Unknown	OG0019334		4.79178	6.03601	0	0	0	1.30166	0	1.21034	0	0	0	0.820122	0	0	0.999185	3.31352	4.02652	2.93259	2.8561	2.52483	2.73173	5.66491	3.83811	5.29595	4.0667	1.07211	0.522295	0	1.61018	0	0.83311	0.485483	0.489014	0	0	1.60093	2.35214	0	0	0	0	grey	-0.0555471	-0.0823529	-0.0991014
Ec-00_000340	EsV-1-164	Transposon or viral gene	OG0008576		3.3074	0	0	0	0	0	0	0	0	0	0	7.14054	6.40593	4.14826	3.93708	0	2.60856	0	1.16871	5.71024	5.30587	0	2.74432	0	0	2.82044	2.64036	0	0.752151	3.2223	2.50821	6.7894	6.12086	0	4.75031	5.06756	4.89436	1.39397	0	1.20016	1.6122	turquoise	0.452925	0.27552	0.493329
Ec-00_000350	HRDC domain	RNA modification or binding	OG0000941		7.74547	7.43724	8.10689	8.53687	8.35088	7.76712	7.59423	8.1671	8.39845	8.20006	8.10404	6.15073	5.67814	5.70021	5.73537	7.27843	7.27839	6.49035	6.84018	6.35466	6.43593	6.80527	6.77233	7.73846	7.29699	7.13408	6.61242	7.82835	8.13381	6.91876	6.90908	5.76042	6.01682	6.04692	6.19939	7.64582	8.00522	7.07142	6.78627	7.14105	7.64779	brown	-0.64596	-0.140961	-0.519521
Ec-00_000370	expressed unknown protein	Unknown	OG0019336		5.50776	9.90613	7.24664	7.61252	7.17891	8.17807	6.63082	5.94112	5.44223	4.77004	5.10103	6.15848	6.53486	6.77291	5.59335	5.0624	4.33063	5.09483	4.8927	5.05894	3.82435	1.94186	1.53617	5.99345	6.76386	1.07211	0.522295	6.73058	6.56605	2.36915	1.35786	6.04021	6.41495	5.85739	6.29909	5.06756	4.8264	2.5568	2.8941	1.84612	3.03565	blue	-0.498998	-0.149954	-0.00601653
Ec-00_000360	expressed unknown protein	Unknown	OG0019335		7.48378	7.7575	2.74265	2.79411	3.25783	1.97463	1.5762	0	2.6082	3.68126	3.71335	0.467569	0.811408	0.845388	0.736313	1.08252	1.1857	0	0	0	1.52649	3.45247	4.17809	3.04635	2.78846	0	0	2.81853	3.09209	0	0	0.485483	0.489014	1.60163	1.08863	0	0	0	0	1.20016	0	blue	-0.509101	-0.191763	-0.15816
Ec-00_000380	Protein kinase-like domain	Cellular regulation and signalling	OG0019337		0	3.55699	5.30114	2.79411	2.97312	2.77832	2.574	2.64517	1.4325	1.21055	2.0105	1.10322	0.811408	0	1.41402	0	1.1857	1.21845	0	2.52483	2.73173	1.27561	1.53617	0.731276	0	0	0.522295	2.25822	2.69475	0	0	0.848085	1.59332	0	0.808298	0	0	2.0895	1.05124	2.63008	3.03565	NA	NA	NA	NA
Ec-00_000390	hypothetical protein	Unknown	OG0005798		7.25074	6.44554	8.54098	7.91179	7.57858	8.34338	8.49862	8.27506	8.68122	8.6171	8.53946	7.80591	7.60465	7.63945	7.63983	8.68765	7.66112	8.55662	8.23144	7.56453	7.78828	7.66379	7.57761	8.2416	7.96859	7.71751	7.51844	8.2786	8.05804	7.37132	7.39442	7.8242	7.86171	7.70076	7.60024	9.07641	8.55458	8.10068	8.06611	7.33904	7.82185	green	-0.0878707	-0.201244	-0.482276
Ec-00_000400	expressed unknown protein	Unknown	OG0019338		0	0	0	0	0	0	0	0	0	1.21055	0	0	0	0	0.41463	0	1.1857	3.16378	1.80579	0	0.95637	3.78545	2.26318	3.75937	1.20982	0	0.904947	0	1.24404	0	0	0	0	0	0	0	0	0	0	0	0	NA	NA	NA	NA
Ec-00_000410	RNA-binding protein Lupus La	RNA modification or binding	OG0003369		7.07143	5.462	9.0855	8.91944	9.01301	7.92331	8.56052	9.35609	7.13268	7.48976	7.97103	8.62246	8.2715	7.99977	8.6192	7.40751	9.18872	7.52451	7.39443	8.38718	8.03065	8.52207	8.68458	6.43985	6.52763	9.0504	9.8048	6.85841	6.17328	9.75117	9.89321	8.40874	7.99318	8.79636	8.27482	7.18359	8.90692	9.20141	8.93971	9.38929	9.80715	cyan	0.0776846	-0.0566266	-0.0370646
Ec-00_000420	Hypothetical protein	Unknown	NA		0	0	1.27694	1.12909	1.43994	0	0.993432	1.21034	0	0	1.33033	0	0	0	0	0	0	0	0	0	0	0	0	1.21426	0	0	0	1.32976	0	0	0.475874	0	0	0	0	0	0	0	0	0	0	NA	NA	NA	NA
Ec-00_000430	expressed unknown protein	Unknown	OG0019339		9.17863	9.28918	6.40891	6.81503	6.89728	6.86722	6.03143	6.34251	7.02387	7.26166	6.52162	5.58741	5.61287	6.15206	5.11389	5.51442	4.6565	5.09483	5.26466	4.45432	5.08384	6.02115	6.61342	7.84998	8.19556	5.54701	5.40744	6.55592	6.55559	4.42057	4.08926	4.95439	5.28272	4.931	5.39017	6.04589	4.68003	4.57241	4.55572	4.05066	4.68292	blue	-0.588309	-0.181595	-0.183831
Ec-00_000435	lncRNA	Unknown	NA		3.3074	5.05783	2.39774	2.18955	1.43994	3.49261	2.31141	2.30503	1.4325	1.21055	2.81935	0	0.462012	0	0	0	0	0	0	0	0.95637	0	0	1.86411	2.09853	0	0	0	0.752151	0	0	0	0	0	0	0	0	0	1.05124	0	0	NA	NA	NA	NA
Ec-00_000440	Metalloenzyme, LuxS/M16 peptidase-like	Proteolysis	OG0019340		5.7655	3.55699	5.82035	5.37034	4.99257	6.73457	7.19638	7.01975	6.24341	7.23674	7.60637	7.48683	7.32453	6.49563	7.51932	7.58596	7.79135	7.84903	7.12453	7.58611	7.45103	7.37362	7.7403	7.06266	6.65528	7.60763	8.30561	5.83298	6.13164	7.01949	7.40444	7.19594	7.0011	7.32855	6.47993	6.98948	8.03564	7.31212	7.20853	7.20589	7.12784	blue	0.588428	-0.0247826	-0.0681678
Ec-00_000450	hypothetical protein	Unknown	OG0019341		0	0	4.38719	2.18955	1.43994	0	0.993432	3.52499	0	0	2.0105	1.10322	0.462012	0	3.45795	3.14146	3.48516	0	0	0	1.93405	3.25187	4.17809	1.21426	2.09853	0.633432	0.522295	2.65481	1.61018	0	0.475874	1.92615	0.853573	2.72156	1.32325	1.60093	0	1.39397	1.05124	0	1.02048	NA	NA	NA	NA
Ec-00_000470	Hypothetical protein	Unknown	NA		0	0	0	0	0	0	0.993432	0	0	0	0	0.467569	0	0	0	0	0	0	0	0	0	0	0	0	0	0	0	0	0	0	0	0	0	0	0	0	0	0	0	0	0	NA	NA	NA	NA
Ec-00_000480	Hypothetical protein	Unknown	NA		0	0	0	0	0	0	0	0	0	0	0	0	0	0	0	0	0	0	0	0	0	0	0	0	0	0	0	0	0	0	0	0	0	0	0	0	0	0	0	0	0	NA	NA	NA	NA
Ec-00_000500	hypothetical protein	Unknown	OG0001163		4.79178	5.462	5.89126	5.59957	5.27381	6.21445	5.19665	5.47117	6.88559	6.79958	5.38869	6.19663	5.33113	5.32339	5.62289	5.54928	6.01651	5.35081	5.80521	5.17741	5.43693	5.19082	5.90466	5.38979	6.26977	5.99645	4.80976	6.53252	5.80075	5.89067	5.8397	5.27072	5.07392	5.8189	5.5139	7.01238	7.33205	6.33578	6.42143	5.53661	6.3621	grey	0.147772	0.128019	-0.100723
Ec-00_000510	Cyclic nucleotide-binding-like	Cellular regulation and signalling	OG0019342		6.75218	6.76415	7.6146	7.29025	7.95236	7.14621	6.76831	7.03429	6.07182	6.53913	6.11181	6.67858	6.23573	6.5457	6.18822	7.43572	7.49775	6.83025	6.14759	6.30347	5.91281	6.63007	6.15601	6.40656	5.97075	6.27843	6.06333	5.77434	5.65162	5.70726	5.76909	6.36126	6.28662	6.42552	6.09228	6.86917	7.56885	5.93631	5.8803	4.94702	6.46647	brown	-0.649532	-0.469717	-0.510831
Ec-00_000520	hypothetical protein, putative	Unknown	OG0000455		9.42266	9.3138	5.3523	5.41117	5.71129	6.29741	5.1165	5.28924	3.68863	5.1363	4.65728	4.30423	4.73701	4.85231	5.14137	5.10987	4.50275	5.35081	4.69834	5.42104	5.1233	4.56901	3.63244	4.90904	4.73364	4.94334	4.85396	4.65637	4.68004	5.29758	4.99413	5.43982	5.19009	4.85695	4.7703	5.63811	5.80075	5.85748	5.65323	6.20298	6.51595	red	-0.34658	0.255778	0.215367
Ec-00_000530	Myb transcription factor	Transcription	OG0019343	TAP	5.50776	6.25526	7.23306	7.30115	7.49884	6.79292	7.10587	7.44657	6.82201	6.79958	7.0195	6.88423	6.71671	6.60595	7.26204	6.42539	7.53789	6.81333	6.84018	7.42779	7.17876	7.07226	7.06627	6.06632	5.79424	6.93399	7.49769	5.53631	5.95194	7.60846	7.6655	7.42814	7.24701	7.17957	7.08167	5.51521	6.71443	7.13963	6.95786	7.56346	7.44131	cyan	0.020786	-0.188704	-0.143997
Ec-00_000540	expressed unknown protein	Unknown	OG0019344		7.74547	7.95827	9.17702	8.93352	7.91188	10.3449	9.392	8.86051	12.0904	11.1606	11.7824	10.0211	9.96381	9.59144	9.43924	10.4869	10.1716	10.4508	10.4371	10.1624	10.4457	10.8729	11.0993	11.8042	11.5922	11.7087	11.5791	11.849	11.3855	9.46257	9.35306	10.1053	9.80529	10.186	9.84317	11.4848	11.8018	9.78422	9.69305	9.33234	8.73754	purple	0.411546	0.096416	-0.171662
Ec-00_000550	N-acetylglucosaminyl transferase component	Metabolism	OG0006204		3.3074	0	6.17318	5.99824	5.88862	6.35018	6.23494	5.94112	7.38816	7.28616	7.29466	5.01738	4.6744	5.37969	5.44687	6.65074	6.55544	7.39401	7.16273	7.09797	6.74507	5.78131	5.35421	5.97843	5.68801	6.57386	6.51256	5.22213	5.83574	6.5077	6.32073	5.19396	5.31232	5.38188	5.05742	7.31835	6.61722	6.11637	6.65427	6.52099	7.01763	yellow	0.208861	-0.106718	-0.371585
Ec-00_000560	hypothetical protein	Unknown	OG0019345		5.50776	4.49436	5.58398	5.99824	5.88862	5.44257	4.79466	4.96441	4.16924	5.42815	5.33556	3.80884	4.16878	4.89156	4.56322	5.71193	3.3108	5.79196	5.48168	5.51404	5.40526	4.05581	2.74432	4.84421	4.80314	5.67705	5.42219	4.52025	4.641	4.83279	4.92158	5.16208	4.8297	4.48324	4.1001	5.63811	5.96779	5.32452	6.16535	5.1714	6.34394	black	-0.201787	0.24829	-0.0409691
Ec-00_000570	conserved unknown protein	Unknown	OG0019346		5.50776	0	5.3523	5.28506	5.71129	5.34193	4.57235	4.46093	4.81692	4.83791	4.82084	4.09395	4.04229	4.89156	4.82286	6.2244	5.70015	5.92394	5.5601	5.4837	5.49824	6.22674	6.19395	4.7051	5.31238	5.49506	5.23435	5.30732	4.99067	5.31279	5.2377	3.70062	4.25979	3.83052	4.25001	6.29036	5.19313	5.89744	6.07645	5.57639	6.30693	yellow	0.150661	-0.110657	-0.235536
Ec-00_000580	hypothetical protein	Unknown	OG0019347		4.23263	3.55699	3.25392	3.392	4.03719	5.44257	3.89461	3.35014	4.29944	2.92054	3.53633	4.91126	4.69557	4.3307	5.07167	2.45179	2.27029	3.538	2.8561	4.78807	4.61533	2.74071	2.26318	6.34931	6.60751	2.92885	2.16669	6.47231	6.37706	2.93851	2.77851	4.47268	4.94757	5.36417	4.88477	5.30868	3.4033	5.85748	5.8803	6.34793	4.68292	turquoise	0.270081	0.527565	0.662446
Ec-00_000590	expressed unknown protein	Unknown	OG0019348		10.3837	10.2245	5.82035	5.70183	4.64289	5.82464	5.8697	5.13595	8.07395	8.20006	8.955	6.44501	6.03443	7.12551	7.71262	7.86029	8.77975	9.73849	9.65021	8.27649	8.26921	8.45355	8.32301	8.79205	7.75282	6.65501	6.04438	7.3683	7.75859	6.23192	5.98918	5.82292	6.48811	7.44264	7.34426	8.06271	8.30901	7.51835	6.93275	7.60252	7.10646	magenta	0.219749	-0.0135209	-0.0726416
Ec-00_000600	hypothetical protein	Unknown	OG0007589		4.79178	5.05783	7.53933	7.41592	7.60421	7.83349	8.10582	8.16049	9.02497	9.38509	9.31202	6.10332	5.76081	5.90591	5.91328	8.26332	7.76623	7.96082	8.08661	7.70266	7.3957	6.58807	6.5563	7.59314	6.97434	7.06449	6.81045	7.24416	7.99365	7.15219	7.16619	6.19002	6.27163	5.51623	6.15445	8.57457	8.25832	7.99417	8.29514	8.08168	9.38712	yellow	-0.0531339	-0.133983	-0.476636
Ec-00_000610	tRNA Leu	Protein synthesis	NA		0	0	0	0	0	1.30166	0	0	0	0	0	0	0	0	0.41463	0	0	0	0	0	0	0	0	0	0	0	0	0	0	0	0	0	0	0	0.460032	0	0	0	1.05124	0	0	NA	NA	NA	NA
Ec-00_000620	hypothetical protein	Unknown	OG0019349		0	3.55699	0	1.12909	1.43994	0	1.99014	1.21034	0	0	0	0	0.462012	0	0.41463	0	0	0	1.16871	0	0	0	0	0	0	0.633432	0	0	0	0.874424	0.83311	0	0	0	0.808298	0	0	0	0	0	0	NA	NA	NA	NA
Ec-00_000625	hypothetical protein	Unknown	OG0019350		3.3074	5.05783	4.28557	4.82303	4.73857	3.96821	2.574	4.96441	2.13694	3.15146	3.09981	2.48371	1.3276	1.3749	3.58347	0	0	0	0	5.6294	5.04327	2.39589	2.26318	7.43703	7.84633	4.30323	4.42648	8.73836	8.45401	6.40504	6.26318	8.27353	7.48005	6.43403	6.65143	8.06271	3.87637	6.44765	5.90633	5.6528	6.01731	salmon	0.189806	0.837325	0.630176
Ec-00_000630	Protein kinase domain	Cellular regulation and signalling	OG0000141		0	0	3.63064	3.392	1.43994	0	3.15823	3.15114	0	0	0	0	0	0	0	0	0	0	0	0	0	0	0	0.731276	3.68008	0	0.522295	0.812953	1.61018	0	0.475874	0	0	0	0.460032	0	0	0	1.65288	1.20016	1.6122	NA	NA	NA	NA
Ec-00_000640	conserved unknown protein	Unknown	OG0005064		4.79178	0	7.38819	7.58602	7.44312	7.40506	7.3963	7.89978	5.99703	7.00543	6.70035	6.78256	6.16918	6.21531	6.91327	6.6981	7.40314	7.01921	7.12453	7.1948	7.04131	6.7492	6.72128	5.62023	5.38218	8.30773	8.88173	5.46394	5.05147	8.2826	8.37493	6.73084	6.34507	6.77289	6.29219	6.7379	7.44966	7.26709	7.00679	7.39573	7.51618	blue	0.113296	-0.0972476	-0.239649
Ec-00_000650	Zinc finger, RING-type	Proteolysis	OG0000367		14.4701	14.4283	8.41429	9.46636	9.7726	8.72437	7.74845	8.36979	7.0049	7.68667	6.85935	7.16383	7.10081	7.22106	7.2776	7.66754	6.75593	6.53232	6.40298	7.04701	6.93445	6.9282	7.12637	7.87859	7.65282	7.52368	6.51256	7.76953	7.60986	6.52085	6.48708	7.02478	7.16421	7.44264	7.60859	8.24781	7.00315	6.60069	6.84127	6.97241	7.1489	blue	-0.621298	0.0141517	0.0344617
Ec-00_000660	Hypothetical protein	Unknown	OG0019351		4.23263	0	7.89895	8.87636	9.29853	8.44392	7.48675	7.89182	0	1.85938	1.33033	0	0	0	0	6.28769	6.12589	5.60794	5.92859	6.73555	6.70662	0	0	0	0	0	0	0	0	0	0	0.485483	0.489014	0	0.460032	6.1733	6.11749	6.33578	6.59149	7.26794	7.12784	black	-0.479965	-0.199399	-0.334616
Ec-00_000670	Protein disulphide isomerase	Protein binding or modification	OG0019352		9.54801	9.10394	10.7791	10.6945	10.977	9.91447	10.5395	10.7446	10.5939	10.0908	10.6753	9.75068	9.80059	9.68238	9.88101	9.91863	10.3142	10.0039	10.0076	10.0799	10.0826	10.578	10.4644	10.0406	10.0118	10.4416	10.5611	10.0831	10.0372	10.5122	10.5053	10.2583	10.4532	9.68222	9.78233	9.73294	10.2254	10.4046	10.5058	10.7233	11.53	yellow	-0.138544	-0.114014	-0.276548
Ec-00_000680	F-box domain	Proteolysis	OG0019353		10.9937	10.7244	7.94134	8.302	7.65414	7.17575	7.0093	6.99024	7.20091	7.45776	7.13282	4.87409	4.39269	3.78115	4.6614	7.89458	7.43537	6.40256	6.60146	6.89391	6.7948	5.01177	4.88282	5.05941	3.94898	5.47732	5.23435	4.61241	5.78293	5.67233	5.92568	4.64405	5.07392	4.51568	4.25001	5.57797	6.67633	7.07142	6.40326	7.20589	7.51618	red	-0.63133	-0.190239	-0.357017
Ec-00_000690	hypothetical protein	Unknown	OG0002065		12.5886	12.5687	7.11952	7.21154	7.12681	6.88521	6.30893	6.45482	6.63736	7.13249	6.74177	6.79256	6.39303	6.38994	6.12768	7.17063	6.29937	5.89206	5.92859	6.03713	6.16051	5.854	5.85816	5.52002	4.86945	5.15902	5.34687	5.00131	5.44051	6.07136	5.92568	5.80239	6.53908	6.36447	6.55677	4.41507	6.17327	5.13701	5.34608	5.89226	5.94689	green	-0.521239	-0.178993	-0.0715832
Ec-00_000700	Hypothetical protein	Unknown	NA		3.3074	3.55699	1.27694	3.02206	3.49551	3.49261	2.79608	2.30503	0	0	0	0	0.462012	0	0.736313	0	0	0	0	0.964221	0	0	0	0.731276	0.728178	0	0	1.32976	1.24404	0	0	0.485483	0	1.60163	0	0	0	0	0	0	0	NA	NA	NA	NA
Ec-00_000710	hypothetical protein	Unknown	OG0019354		5.50776	5.05783	1.27694	1.75464	3.25783	2.77832	2.574	1.85911	3.68863	3.95017	3.09981	2.98002	2.65179	3.28751	3.77108	3.14146	3.48516	2.65715	2.2462	4.01936	4.16411	1.27561	0	4.33221	4.0667	2.70321	2.91525	3.43809	3.94208	3.70957	3.32012	4.08765	4.34818	4.931	4.00206	5.30868	4.95927	4.24093	4.18244	5.06356	4.99357	NA	NA	NA	NA
Ec-00_000720	ferredoxin-dependent glutamate synthase,	Metabolism	OG0019355		5.50776	0	4.05795	4.8823	5.39623	5.70818	6.25379	5.97165	6.39674	6.38885	6.91473	7.02232	6.56967	6.58215	7.22399	7.19284	7.08876	6.86351	6.75938	6.25039	6.51223	6.91126	6.72128	6.95931	7.0901	7.45282	7.22648	7.13964	7.09267	7.11364	7.24635	6.62371	6.70449	6.91346	6.77036	6.53142	6.08877	6.50048	7.08863	7.03084	7.07379	blue	0.638501	0.115375	0.122596
Ec-00_000730	Protein kinase-like domain	Cellular regulation and signalling	OG0019356		8.77178	8.85827	5.30114	5.52713	5.27381	5.11678	5.68753	5.13595	3.68863	5.38343	4.74138	5.20872	4.797	4.08193	5.28381	5.71193	5.98782	5.56814	5.39874	5.13899	5.52795	4.73216	5.21352	4.66812	4.86945	5.93278	5.52144	4.78074	5.05147	4.9541	5.49684	3.98204	4.1977	5.15351	4.1001	6.29036	6.14565	5.20226	5.22722	5.31939	5.94689	red	-0.352047	0.074386	-0.0197089
Ec-00_000740	Hypothetical protein	Unknown	OG0019357		0	3.55699	10.6762	11.428	9.91252	11.4547	10.868	8.61189	2.6082	2.64548	5.28041	0	0	3.5056	0.41463	13.9106	12.0835	15.0512	14.3449	13.8248	13.7995	3.45247	3.83811	5.34364	4.9015	2.43563	0	4.78074	5.2719	1.62442	1.90123	3.35068	2.07993	3.02184	3.37703	15.7385	14.1921	12.0648	13.525	13.275	12.2519	black	-0.12867	-0.0570789	-0.265153
Ec-00_000750	hypothetical protein	Unknown	OG0019358		0	3.55699	1.27694	0	0	0	0	0	1.4325	1.21055	6.70035	2.15218	3.0958	6.10273	6.10692	3.14146	6.45421	6.57311	5.77264	3.3937	3.24242	0	0	0	0	0	0.522295	0	0	0	0	0	0	1.01252	1.70196	0	0	0	0	0	1.02048	grey	0.132143	-0.45461	-0.220143
Ec-00_000760	hypothetical protein	Unknown	OG0019359		0	0	0	0	0	0	0	0	0	0	0	0	0	0	0	0	0	0	0	0	0	0	0	0	0	0	0	0	0	0	0	0	0	0	0	0	0	0	0	0	0	NA	NA	NA	NA
Ec-00_000770	hypothetical protein	Unknown	OG0019360		0	3.55699	5.92544	6.41434	6.4372	6.45027	5.68753	6.34251	6.58725	7.15926	7.06916	5.22357	5.15892	5.32339	5.39073	7.61915	6.09932	7.14627	7.01742	6.21389	5.72036	5.07395	5.35421	5.76735	5.66952	6.37741	5.46557	5.64939	5.2719	4.97336	5.01171	5.38562	5.62697	4.8314	4.64597	6.96621	5.39431	5.8164	6.26929	5.6151	5.74034	green	0.0373168	-0.285549	-0.44551
Ec-00_000780	cupin-like protein	Unknown	OG0019361		0	3.55699	1.27694	1.12909	2.14606	1.97463	2.79608	0	2.13694	0	0	0	1.09247	0	0	0	0	0	0	0	0	0	0	0	1.20982	0	0	0	0.752151	0	0	0	0.489014	0.59332	0	0	0	0	0	0	0	NA	NA	NA	NA
Ec-00_000790	Glycosyltransferase, DXD sugar-binding motif	Metabolism	OG0004346		4.23263	3.55699	3.92908	3.81345	4.31063	3.29142	4.68778	4.06756	5.05675	5.1363	4.47278	5.03433	5.12811	4.92977	4.90531	4.67752	5.66433	4.38574	5.48168	4.68517	4.66965	5.49349	5.35421	5.00113	5.023	5.58064	6.05389	4.69903	4.33346	5.87027	5.91637	4.52375	4.43147	5.38188	4.33301	5.38086	6.14565	4.99693	4.95534	5.06356	4.56249	blue	0.593902	0.168769	0.045219
Ec-00_000800	hypothetical protein	Unknown	OG0019362		0	0	0	0	0	0	0	0	0	0	0	0	0.462012	0	0	0	0	0	0	0	0	0	0	0	0	0	0	0	0	0	0	0	0	0	0	0	0	0	0	0	0	NA	NA	NA	NA
Ec-00_000810	hypothetical protein	Unknown	OG0019363		0	5.05783	6.30886	5.82779	5.84629	6.47424	6.55683	5.743	6.33735	6.67522	6.84041	6.21161	5.9041	5.86705	6.12768	6.44403	6.80609	6.30908	6.70864	6.77367	6.70662	6.4542	6.23092	6.64409	6.43214	7.18416	7.47665	6.26079	6.41226	7.76311	7.81568	6.39594	6.70449	5.83184	6.81916	7.14265	6.55558	7.17257	7.31923	7.26794	6.88581	blue	0.434881	0.145563	-0.0144246
Ec-00_000820	Glycosyl transferase, family 48	Metabolism	OG0019364		9.84184	10.045	7.86412	7.74616	7.85964	8.34987	8.60525	8.39254	8.54347	8.74192	9.91106	9.23169	9.55849	9.61655	9.24788	8.89154	9.65577	9.14539	8.93003	9.02833	8.99901	9.37327	9.57193	8.50803	8.2401	9.14333	9.48468	8.28562	8.25186	9.66938	9.68092	9.83024	9.73736	9.61735	9.91677	8.57457	9.77402	9.89197	10.049	9.94723	9.77024	brown	0.588234	0.234295	0.369101
Ec-00_000830	expressed unknown protein	Unknown	OG0019365		3.3074	0	1.27694	1.12909	1.43994	1.30166	1.99014	0	0	1.21055	1.33033	1.72101	1.52973	0.845388	2.41371	1.08252	0	0	2.58314	1.53706	1.52649	5.88901	5.85816	2.79514	3.03949	0	0.522295	3.09897	2.53359	0	0	2.43312	2.97439	2.47986	2.24966	1.60093	1.24404	2.9092	2.07619	1.20016	2.03061	grey	0.191701	0.0160452	0.177218
Ec-00_000840	Ribosomal protein S5, C-terminal	Protein synthesis	OG0019366		0	0	0	0	0	0	0	0	0	0	0	0	0	0	0	0	0	0	0	0	0	0	0	0	0	0	0	0	0	0	0	0	0	0	0	0	0	0	0	0	0	NA	NA	NA	NA
Ec-00_000850	hypothetical protein	Unknown	OG0019367		0	0	1.94355	3.02206	2.14606	3.29142	3.31008	1.85911	2.13694	2.92054	1.33033	0.467569	0.462012	1.3749	1.22146	1.08252	0	1.21845	0	2.26425	0.95637	0	2.26318	0.731276	0	0	0.522295	0.812953	0.752151	0	0	1.92615	2.33195	1.33694	1.525	0	1.24404	1.39397	0	0	1.02048	NA	NA	NA	NA
Ec-00_000860	hypothetical protein	Unknown	OG0019368		9.06336	9.04633	7.5935	7.91179	7.78316	7.32822	7.55676	7.47881	7.73737	7.64938	9.1133	6.77754	6.34695	5.48611	5.94481	7.58596	7.43537	6.28473	6.2693	6.37133	6.45152	5.854	5.94971	7.45884	6.80679	6.86744	6.84371	7.2585	7.42115	6.19137	5.98028	6.22901	6.16209	6.46759	5.21159	6.94255	8.28389	6.50048	5.95702	6.39318	6.10616	red	-0.658673	-0.164837	-0.413554
Ec-00_000870	Carbohydrate-binding WSC	Cell wall and extracellular	OG0000120		3.3074	0	1.94355	1.75464	0	0	0.993432	1.85911	0	0	2.0105	0.467569	0	0	0	0	1.8276	0	0	0	0.95637	1.27561	4.17809	4.4675	4.12215	0.633432	0	4.14157	4.38161	0.502471	0.83311	0	0	0	0	1.60093	0	0	1.05124	0	1.6122	NA	NA	NA	NA
Ec-00_000880	hypothetical protein	Unknown	OG0000725		6.62786	6.44554	6.40891	6.75287	6.7897	6.71458	5.41341	5.67042	6.24341	6.79958	6.49764	5.16321	5.48496	5.88661	5.55299	5.54928	6.01651	5.4851	5.35542	5.57287	4.82131	4.87873	4.3221	4.84421	4.27674	5.69251	6.28129	4.69903	4.641	5.82857	6.00682	5.39936	5.54207	5.45062	5.46567	5.30868	6.20038	5.43723	5.42021	5.31939	5.68372	red	-0.586141	-0.257995	-0.40818
Ec-00_000890	CBS domain	Cellular regulation and signalling	OG0019369		0	0	0	0	0	0	0	0	0	0	0	0	0	0	0	0	1.1857	0	0	0	0	0	0	0	0	0	0	0	1.24404	0	0	0.485483	0	0	0	0	0	0	1.05124	0	0	NA	NA	NA	NA
Ec-00_000900	hypothetical protein	Unknown	OG0000033		0	0	0	1.12909	0	1.30166	0	0	0	0	0	0	0	0	0	0	0	0	0	0	0	0	0	0	0	0	0	0	0	0	0	0	0	0	0	0	0	0	0	0	0	NA	NA	NA	NA
Ec-00_000910	hypothetical protein	Unknown	OG0019370		0	0	0	1.12909	0	0	0	0	0	0	0	0	0	0	0	0	0	0	0	0.964221	0	0	0	0	0.728178	1.40803	0.522295	0.812953	1.24404	0.502471	0.475874	0.485483	0	0	0	0	0	0	0	0	0	NA	NA	NA	NA
Ec-00_000920	WLM	Proteolysis	OG0019371		0	0	1.27694	0	0	0	0	0	0	0	0	4.6723	0	0	0	0	0	0	0	0.964221	0.95637	0	0	0	0	0	0	0	0	0	0	0	0	0	0	0	0	0	0	2.29071	1.6122	NA	NA	NA	NA
Ec-00_000930	conserved unknown protein	Unknown	OG0000245		0	0	0	0	1.43994	0	0	0	0	0	2.0105	2.48371	2.46716	4.14826	1.41402	1.08252	2.88239	0	0	0.964221	0.95637	4.65289	4.45303	2.9262	3.03949	2.28059	1.20709	2.96555	2.53359	3.56469	2.17532	1.37863	1.59332	1.60163	3.7435	0	1.90196	3.6318	4.09462	2.29071	1.02048	NA	NA	NA	NA
Ec-00_000940	Purple acid phosphatase, N-terminal	Metabolism	OG0000420		9.75535	9.64015	9.10054	8.68155	8.60685	9.38608	9.23478	9.01139	10.3244	10.3669	9.82935	10.8949	11.1765	11.371	10.853	9.65222	10.1891	10.4398	11.1596	10.669	10.6663	10.4013	10.6241	9.76109	10.1657	9.71709	10.0412	10.3722	10.0372	10.7814	10.7583	11.3986	11.4015	10.7301	11.6353	10.4151	9.60177	11.239	11.4416	10.9465	11.3004	brown	0.850486	0.314174	0.569486
Ec-00_000950	Serine/threonine/dual specificity protein kinase, catalytic domain	Cellular regulation and signalling	OG0001298		15.5998	15.5963	11.8185	11.8718	11.6966	11.3916	11.6203	11.5786	11.0681	10.839	11.8532	11.5289	11.9712	12.186	11.7682	10.9443	11.7589	11.4987	11.523	11.6804	11.6482	11.9931	12.1691	11.353	11.2872	11.5392	11.9716	11.3547	11.207	12.2183	12.1228	12.0437	11.9917	11.8989	12.1178	10.7165	11.3526	12.1244	12.2313	11.8337	11.7993	green	-0.22609	0.104419	0.233352
Ec-00_000960	Hypothetical protein	Unknown	NA		5.7655	5.77737	3.92908	4.40481	3.87821	3.66915	2.98849	2.64517	2.13694	1.21055	3.53633	1.10322	0.462012	2.53119	1.58388	1.08252	0	1.86945	1.16871	1.94599	0.95637	1.94186	2.74432	2.79514	1.20982	2.10685	1.45678	3.33366	3.30684	0.502471	0.475874	0.485483	0	1.82521	1.08863	0	1.90196	1.39397	1.05124	1.20016	1.02048	blue	-0.732151	-0.216218	-0.244822
Ec-00_000970	SEN1 protein	RNA modification or binding	OG0004777		10.7766	10.496	9.57178	9.71078	9.00822	9.34766	9.27918	9.55819	9.78047	10.0485	9.69344	10.1923	9.70139	10.1683	10.1708	10.2833	10.5739	10.2781	10.1008	10.0517	9.99494	10.212	10.2425	10.2093	10.2136	10.7669	10.6058	10.665	10.1682	10.7416	10.8288	9.99992	9.893	10.5495	10.22	11.3984	10.8198	10.5852	10.6456	10.4214	10.2707	brown	0.56407	0.552749	0.374125
Ec-00_000980	CDC50/LEM3 family	Membrane function and transporters	OG0009222		10.3545	10.5173	9.97823	9.68604	9.71789	10.23	10.2849	10.2468	10.8357	10.4906	10.4297	11.0765	11.2579	11.1476	10.8509	10.3832	10.4506	10.5989	10.7225	11.3295	11.1759	11.0438	11.1399	10.646	10.9791	11.0249	11.45	11.1143	10.7641	11.5507	11.4106	11.8461	11.7821	11.6272	12.0216	10.6541	11.1205	11.3875	11.74	11.1579	10.5133	brown	0.825653	0.553965	0.610069
Ec-00_000990	Hypothetical leucine rich repeat protein	Cellular regulation and signalling	OG0019372		5.50776	6.76415	3.92908	4.48348	5.33632	5.89737	5.63096	4.96441	3.68863	4.06791	3.871	6.97042	7.42301	7.22106	7.11039	2.71999	4.13517	1.21845	3.28344	7.09797	6.69357	4.28341	2.26318	6.37249	6.05863	6.02115	5.37748	6.42227	6.57643	6.63411	6.81207	6.6867	7.25084	7.61726	8.22861	5.38086	4.8264	6.50048	6.22861	7.80025	6.39773	turquoise	0.344831	0.62645	0.864945
Ec-00_001000	ATPase family AAA domain-containing protein 3, domain of unknown function DUF3523	Membrane function and transporters	OG0009223		8.64922	8.68034	3.92908	4.82303	4.8283	3.66915	2.79608	3.15114	3.86722	3.15146	1.33033	7.93563	8.37519	7.48119	7.89723	3.14146	3.90901	3.36299	4.62726	8.92486	8.33371	4.56901	4.45303	8.10646	7.76158	6.28864	5.67715	8.14613	8.49836	7.01485	7.10198	8.45881	9.23698	8.90905	8.8035	7.57065	5.44051	7.28226	7.78674	9.2049	9.28378	turquoise	0.505662	0.743832	0.96579
Ec-00_001010	tRNA Gly	Protein synthesis	NA		4.79178	4.49436	3.45454	3.392	3.49551	4.32529	1.99014	1.85911	2.13694	2.92054	0	1.72101	1.09247	0.845388	1.87328	1.69398	3.11244	1.21845	2.2462	0.964221	1.93405	1.27561	1.53617	1.57547	3.34931	2.28059	1.66957	3.43809	3.49372	0	0	1.37863	1.77438	1.33694	0.808298	4.54642	2.97141	0	1.65288	0	0	NA	NA	NA	NA
Ec-00_001020	Zinc finger, TFIIS-type	Transcription	OG0008455	TAP	9.96257	9.87337	8.41429	8.45138	8.13928	8.38191	8.36625	8.31132	8.52362	8.5223	8.636	8.88208	8.98204	8.67854	8.77755	8.64397	8.7243	8.72894	8.85424	8.53135	8.63951	9.63026	9.86731	9.0347	9.09605	8.40713	8.88838	9.04986	9.07194	8.86538	8.86783	8.8159	8.81145	8.97325	9.40548	8.14792	7.67893	7.97563	8.30984	7.54353	6.30693	yellow	-0.0377685	-0.100272	0.00834058
Ec-00_001030	hypothetical protein	Unknown	OG0008454		11.5162	11.3719	5.89126	6.33169	7.091	5.49038	4.15749	4.37218	4.63157	4.37253	3.09981	2.83278	4.07497	4.89156	4.56322	2.45179	5.62761	0	1.16871	2.26425	2.51149	3.92695	3.39248	5.45638	3.94898	0	0.904947	3.09897	5.16589	1.16987	1.35786	3.98204	4.53554	6.1226	4.95633	1.60093	0	1.39397	1.05124	0	1.02048	blue	-0.582982	-0.181621	-0.0119866
Ec-00_001040	Ankyrin repeat-containing domain	Membrane function and transporters	OG0019373		10.5298	10.796	5.78355	6.07647	7.37031	6.15636	5.65952	5.743	5.60217	5.81247	5.22306	7.83281	7.76345	7.40185	7.21108	5.54928	4.58167	5.03769	5.39874	6.2683	6.14142	4.73216	4.97287	8.75285	8.71382	4.86363	3.81631	8.1384	8.53342	6.45386	6.4424	7.62225	8.21116	8.23916	8.7173	6.76513	4.42821	7.47939	7.96448	7.63113	7.55615	turquoise	0.0521686	0.467239	0.718971
Ec-00_001070	expressed unknown protein	Unknown	OG0019374		10.1663	9.9849	9.25974	8.5183	8.55523	8.98433	9.1058	9.10731	8.30853	8.67391	8.27603	8.92815	9.15536	8.68413	8.57832	8.86066	8.90779	9.02928	8.72829	7.45932	7.89473	9.04103	9.26837	7.45884	7.85044	7.528	7.18815	7.72377	7.46092	7.78235	7.64593	7.32032	7.79775	7.80289	8.05612	7.53945	7.7812	8.14284	7.55137	7.36198	7.54824	grey60	-0.59062	-0.718307	-0.456375
Ec-00_001080	GPI inositol-deacylase PGAP1-like	Protein binding or modification	OG0006456		7.74547	8.43307	9.25639	9.43454	9.32189	9.41423	9.38132	9.64598	9.34068	9.44617	9.48665	9.54798	9.44666	9.46865	9.37486	9.36978	9.70948	9.32327	9.30217	9.36435	9.2822	9.1569	9.24145	9.36297	9.14036	8.93489	9.22661	9.28855	9.42778	9.60059	9.56513	9.53897	9.40181	9.56696	9.67705	9.49756	9.67847	9.69919	9.65517	9.87928	10.1268	blue	0.389113	0.0403907	0.0629108
Ec-00_001090	Dimeric alpha-beta barrel	Metabolism	OG0001607		6.86662	6.61362	6.78908	7.31197	7.091	7.6137	7.85726	7.2858	7.8047	7.95466	7.20864	7.84246	7.803	7.67363	7.83127	8.01167	7.68813	7.83232	8.02573	7.57895	7.96157	8.12679	8.24383	7.41488	7.79181	6.88099	6.83271	8.19538	7.68374	6.95313	6.90438	7.49045	7.57469	7.99061	7.77368	7.78533	7.13543	7.47939	8.06033	7.28004	7.05159	red	0.356939	-0.249924	-0.0633188
Ec-00_001100	expressed unknown protein	Unknown	OG0007298		11.9775	12.0731	6.05462	5.45087	5.80268	6.09584	6.57194	6.67486	6.58725	5.81247	4.82084	8.97829	9.20787	7.86821	7.68954	6.92737	7.37017	6.83025	7.17525	7.16643	7.14081	7.3612	7.64764	8.35646	8.76262	6.83297	6.32119	8.53558	8.41115	6.80511	6.512	8.84003	8.76269	8.00211	6.90305	6.79185	8.94748	7.20477	6.78627	6.95742	6.72678	yellow	0.120942	0.297224	0.49745
Ec-00_001110	Regulator of chromosome condensation 1/beta-lactamase-inhibitor protein II	DNA or chromatin modification	OG0007299		8.32819	8.75416	1.27694	2.79411	4.54041	3.29142	0.993432	1.85911	0	0	1.33033	7.62472	7.85332	7.1899	6.78846	3.14146	3.48516	1.21845	2.8561	7.21341	6.46694	3.45247	3.63244	7.92243	7.44022	5.72295	4.56586	7.15504	7.59971	5.88051	5.49684	6.82038	7.68063	7.07459	7.66308	5.75136	3.20345	6.01105	6.12158	6.74695	7.12784	turquoise	0.446221	0.65224	0.944255
Ec-00_001120	Intraflagellar transport protein 43	Cytoskeleton and flagella	OG0007300		4.23263	5.05783	2.39774	3.02206	2.61807	0	0.993432	1.85911	1.4325	0	0	6.61803	7.25136	6.53334	6.80144	3.84928	2.88239	1.21845	3.75286	7.59323	7.22484	4.05581	3.63244	6.49369	6.57807	6.02115	5.49378	6.34378	6.66665	6.14116	6.05849	6.11706	6.94078	6.91346	7.4472	5.30868	3.20345	5.85748	6.26929	7.15426	7.31653	turquoise	0.649845	0.662126	0.921706
Ec-00_001130	Mak16 protein	Cell cycle	OG0008720		9.03916	8.78971	9.86168	10.2015	9.98504	9.24341	9.4298	9.99521	8.17919	7.77589	8.21851	8.95177	8.43463	8.29152	8.74321	8.1879	8.80464	7.54516	7.82596	7.95019	8.15009	9.47184	9.59693	8.55183	8.71382	9.06086	9.37616	9.16466	8.62128	9.2401	9.34181	8.20085	7.85418	8.90905	8.70437	8.07364	9.24949	8.86103	8.89491	8.75429	8.84793	greenyellow	-0.540542	-0.121434	-0.151983
Ec-00_001140	WD40/YVTN repeat-like-containing domain	Protein binding or modification	OG0006380		9.34581	9.15934	10.0861	10.26	10.4711	11.0476	10.5395	10.6284	11.0532	11.4849	11.1542	10.2515	10.5819	10.8023	10.4872	11.0809	10.3372	10.9853	10.7257	10.3952	10.2129	9.74222	9.7858	10.4598	10.2874	10.1043	9.8471	10.1898	10.3599	9.56691	9.59969	10.8266	10.8379	10.1961	10.5078	10.9375	10.0049	10.2855	10.5342	10.488	10.7298	yellow	0.0768301	-0.264352	-0.254886
Ec-00_001150	Protein phosphatase 2C	Cellular regulation and signalling	OG0008721		4.79178	6.44554	7.33831	6.76866	7.26176	7.69755	9.16178	8.35829	8.10989	7.76721	7.47743	9.29284	9.08991	8.37698	8.24313	8.43155	9.37197	8.95793	8.91519	7.52783	8.22001	9.19237	9.1186	7.83338	8.07077	7.50191	7.55236	8.2394	7.72632	8.10406	7.90777	7.86933	8.53683	8.26802	5.92401	7.29986	8.1651	9.70764	9.24775	8.46215	8.61421	blue	0.416065	-0.272963	-0.0848263
Ec-00_001160	Forkhead-associated (FHA) domain	Cellular regulation and signalling	OG0006381		7.86043	8.43307	9.18056	9.32664	9.34867	8.89392	8.61258	9.01506	8.60142	8.77692	8.48562	8.26852	8.27854	8.12446	8.23678	8.55245	8.6621	8.37249	8.49866	8.22698	8.24705	8.61388	8.7624	8.29412	8.45508	8.62019	8.25088	8.38368	8.45119	8.43105	8.46861	8.10768	8.151	8.35353	8.37451	8.67846	8.49562	8.48848	8.45797	8.397	8.9171	brown	-0.647365	-0.409699	-0.557286
Ec-00_001170	expressed unknown protein	Unknown	OG0006382		10.2103	10.288	10.3321	10.6632	10.4215	11.2778	11.5055	11.4645	10.2172	10.3769	11.0529	10.6134	10.815	10.678	10.4946	11.3706	9.96635	11.8898	11.5082	11.1025	11.0173	11.3878	11.5079	10.863	11.0678	10.8065	10.9277	10.7612	10.4906	9.98384	10.1435	10.7817	10.4098	10.2215	10.5144	10.5464	10.1405	9.64742	10.1034	9.8753	9.46268	grey	-0.173028	-0.431262	-0.432172
Ec-00_001180	Leucine rich repeat protein	Cellular regulation and signalling	OG0006383		7.62055	8.01942	6.43288	6.54847	6.40839	7.73771	7.24431	7.10484	5.7911	5.87842	6.04719	8.24505	8.58684	8.18496	7.90326	6.99214	4.86018	6.92782	6.82438	7.89361	7.91174	5.62393	5.9934	9.1944	9.40353	8.46454	8.44577	8.54438	8.43416	7.11364	7.18181	8.23956	8.2951	8.01067	7.38048	8.58224	6.59697	6.94369	7.17681	7.15426	7.43275	turquoise	0.29093	0.625326	0.735257
Ec-00_001190	expressed unknown protein	Unknown	OG0019375		7.9669	7.43724	8.76518	8.7388	8.55523	8.37556	9.04756	9.15131	8.51024	8.38157	8.28306	9.09194	9.18653	9.32011	8.91922	8.46388	9.35802	8.68775	8.84252	8.77005	8.71571	9.52289	9.55381	8.45745	8.77564	8.44642	8.5997	8.97373	8.52541	8.98289	8.84594	8.91009	8.91275	9.2525	9.41106	8.3945	9.30361	9.27529	9.24775	9.10645	8.47935	red	0.402562	-0.125036	0.0804602
Ec-00_001200	Hypothetical leucine rich repeat protein	Cellular regulation and signalling	OG0019376		5.50776	5.05783	3.02081	4.8823	4.31063	4.32529	4.15749	4.37218	1.4325	1.21055	2.81935	7.55007	7.84624	7.97714	8.36615	5.01331	3.90901	1.21845	2.58314	7.1472	6.6127	4.17409	4.3221	8.06438	8.10213	8.03503	6.49871	7.4826	8.1822	8.21341	7.92178	7.39423	7.87417	8.74768	9.13855	7.07899	5.90328	7.32683	7.26996	8.86684	8.56412	turquoise	0.564711	0.719341	0.919654
Ec-00_001210	Hypothetical protein	Unknown	OG0019377		9.1563	9.45332	2.74265	3.81345	5.56234	4.42706	2.79608	4.06756	0	0	0	4.98287	4.99783	2.88244	3.50101	2.94606	0	1.86945	0	4.32338	3.50394	0	1.53617	5.19557	4.86945	3.37452	1.20709	4.31615	4.51713	2.24785	3.07458	4.59713	4.98481	4.48324	4.43673	4.41507	1.90196	4.11103	4.09462	5.4536	4.49828	pink	-0.165073	0.469399	0.657668
Ec-00_001220	Pleckstrin homology-like domain	Cellular regulation and signalling	OG0008712		11.8546	11.7331	3.25392	5.41117	6.72108	5.82464	4.57235	4.83756	2.13694	3.82197	2.0105	7.72209	7.41346	5.80673	5.85638	3.84928	3.64069	2.3164	3.6127	7.27672	6.66711	2.39589	3.39248	6.95163	6.59777	5.54701	4.48386	6.09499	6.15953	4.91479	5.35253	7.21549	7.65487	7.12278	6.57393	5.69585	4.8264	6.67152	6.45708	7.35056	7.43275	pink	0.00440767	0.533281	0.749098
Ec-00_001230	Kynurenine/Oxoglutarate Transaminase	Metabolism	OG0008716		7.25074	6.76415	8.43817	8.18328	8.31252	7.72778	8.13663	8.61189	8.30853	8.03638	7.72472	9.20574	8.63009	7.8926	8.55424	7.73721	8.65756	7.96849	7.79386	7.9939	7.99918	8.34425	8.27956	8.032	8.0459	7.77673	8.36408	7.97008	8.94948	8.81422	8.45583	8.55862	8.50514	9.48944	8.28875	7.16327	11.0061	8.96808	7.67006	8.28142	8.05732	blue	0.22794	0.0870132	0.0619218
Ec-00_001240	Ribosomal protein L41	Protein synthesis	OG0019378		10.5976	10.1026	12.7505	13.464	13.3282	13.6857	13.8458	13.9237	15.0063	15.2005	14.9075	12.8636	12.5535	12.7632	13.066	15.0904	14.9442	15.3779	15.2128	14.1138	14.2981	13.8248	13.3038	14.7467	14.1391	14.7983	14.6486	14.2413	14.5641	14.1055	14.0599	12.8557	12.9772	12.4605	12.5663	15.0488	15.0502	13.1355	13.2351	12.8665	12.2916	purple	0.177894	-0.123619	-0.492066
Ec-00_001250	pre-mRNA splicing factor, putative	RNA modification or binding	OG0019379		4.79178	3.55699	6.0234	5.66854	6.15455	6.45027	6.07449	5.94112	5.32482	5.74336	3.871	3.76889	3.66691	4.3307	3.73546	5.20036	4.98156	4.78342	4.69834	2.93679	3.72525	4.65289	4.3221	4.77633	4.9015	3.12392	4.13562	4.56707	4.95927	3.40363	3.71299	3.40617	2.73309	3.66681	2.80924	4.27056	4.95927	3.1922	4.00111	3.50859	1.6122	turquoise	-0.720083	-0.530404	-0.697336
Ec-00_001260	hypothetical protein	Unknown	OG0019380		4.23263	4.49436	4.65508	4.8823	4.64289	4.52212	4.63122	4.06756	5.38472	5.87842	3.71335	3.76889	2.96242	1.3749	2.93718	4.54564	3.64069	3.83488	3.28344	2.26425	3.24242	3.62854	3.39248	4.55112	3.8863	4.0863	4.09936	4.14157	4.79118	3.15642	3.52989	3.40617	2.73309	2.47986	2.35932	2.34107	3.73524	3.1922	2.8941	1.84612	2.03061	turquoise	-0.630535	-0.310959	-0.585488
Ec-00_001270	hypothetical protein	Unknown	OG0019381		3.3074	4.49436	4.28557	4.55808	4.64289	4.84987	4.07508	3.94983	4.16924	4.37253	3.09981	3.6855	3.38357	3.28751	2.80596	3.84928	4.13517	3.96316	3.99795	2.52483	3.24242	3.01882	2.74432	3.15725	3.43938	3.52027	3.903	3.43809	3.73525	3.15642	2.93413	3.29296	2.07993	3.02184	2.72979	3.19117	4.12294	1.39397	3.25979	1.20016	3.03565	NA	NA	NA	NA
Ec-00_001280	P-loop containing nucleoside triphosphate hydrolase	Metabolism	OG0008717		9.75535	9.15934	8.28202	8.54147	8.30473	8.28359	8.27228	8.28117	7.21748	7.35727	7.08534	7.15611	6.72703	6.88413	6.63259	7.32945	7.4669	6.59307	6.5828	6.3378	6.90078	7.24438	6.938	6.86442	7.16461	7.61981	7.58551	7.17029	7.33817	7.33082	7.40111	6.60011	6.60634	6.75941	6.5159	6.89405	7.5895	7.07142	6.89425	7.12773	6.97108	tan	-0.818604	-0.181797	-0.302191
Ec-00_001290	expressed unknown protein	Unknown	OG0008713		15.7804	15.7192	10.1011	10.8408	11.3269	9.8745	9.39412	10.1197	9.06213	9.05873	8.9855	9.49922	9.70857	9.3433	9.35666	8.87102	9.95713	9.10771	9.41461	9.44333	9.41732	9.32614	9.26392	7.97637	8.16288	9.18629	9.26701	8.66225	8.58318	10.0045	9.99063	9.05168	8.92118	9.69644	9.16805	8.38576	10.1317	9.91405	9.7263	9.83487	9.71658	green	-0.497034	-0.031835	0.0241632
Ec-00_001300	Dolichol kinase	Metabolism	OG0008714		11.4258	11.435	9.0855	8.68987	8.98402	9.32806	8.30429	8.52193	8.56951	9.09732	9.31546	9.23444	9.32457	9.42918	9.02166	9.15464	9.38853	9.27155	9.19565	9.13711	9.15946	8.91928	9.02698	9.64337	8.77131	8.79508	8.51622	8.5989	9.46876	8.79675	8.8882	9.33425	9.67677	9.00359	9.18862	8.53557	9.24299	9.61184	9.20645	9.25785	9.51837	green	-0.0932922	0.115597	0.282091
Ec-00_001310	SET domain protein	DNA or chromatin modification	OG0001605		9.26464	9.26413	10.2212	10.7332	10.4412	10.1146	9.91018	10.4677	8.53688	8.98581	8.60266	8.64884	8.60793	8.88713	8.93893	8.17122	8.70239	8.34331	8.36851	8.15178	8.32104	8.98549	8.7624	9.12446	8.88387	8.44642	8.65539	9.17603	9.21003	8.55768	8.46702	8.51511	8.39186	8.08823	8.25012	8.6856	8.25186	8.14284	8.64349	8.2934	8.65528	brown	-0.878769	-0.356991	-0.361777
Ec-00_001320	Flavoprotein Monooxygenase	Metabolism	OG0003318		10.5471	10.4186	9.51117	9.36351	9.08759	9.47787	9.76657	9.45393	8.33913	7.9393	8.85	9.4192	9.17433	9.2311	9.40635	9.049	9.79684	9.13521	8.87357	8.67925	8.77885	9.8704	9.94167	8.52105	8.32525	9.36817	9.93716	8.31334	8.07645	9.35194	9.3608	9.07862	8.74245	9.49148	9.11431	8.33215	9.42347	8.8304	8.42234	8.75862	8.18519	tan	-0.367101	-0.296979	-0.194142
Ec-00_001330	Hypothetical protein	Unknown	OG0019382		11.5551	11.6533	4.57119	6.7369	7.64182	6.24263	4.51097	5.51328	2.6082	2.30532	0	3.64193	3.38357	3.28751	2.32062	0	0	0	0	3.51868	2.73173	0	0	3.89358	3.60422	1.68033	0.904947	4.01222	2.8397	3.84121	3.83652	4.1212	4.48444	5.32808	5.39017	1.60093	1.90196	4.24093	2.40305	4.75238	2.61893	pink	-0.511981	0.242604	0.322387
Ec-00_001340	Ankyrin repeat	Membrane function and transporters	OG0005494		3.3074	5.462	6.14444	5.45087	5.20847	5.17645	5.44657	5.97165	12.3378	11.6379	12.2778	6.31233	6.4749	6.95995	6.36179	6.63461	8.00687	6.97424	6.69132	6.3378	6.37185	6.33228	5.85816	5.91671	5.57334	7.0822	8.07999	6.18778	6.2401	7.48305	7.45029	6.58215	6.54532	6.47586	6.65681	9.62191	9.7071	7.20477	7.18746	8.28142	6.80849	yellow	0.259636	-0.0740841	-0.332165
Ec-00_001350	conserved unknown protein	Unknown	OG0019383		4.23263	6.44554	6.14444	5.85764	6.28705	6.54386	6.11631	6.31896	7.34357	7.43603	8.18135	6.3802	6.03443	6.55795	6.28379	6.88707	6.9469	6.37975	6.4241	6.51327	6.45152	6.96148	6.77233	7.11855	7.356	6.92092	6.76488	7.39449	7.22394	7.03791	7.00437	6.21354	6.88277	6.63201	7.41582	7.39006	6.75156	6.88528	6.8547	6.76428	6.8983	green	0.440283	0.15249	-0.0547824
Ec-00_001360	aureochrome 2	Cellular regulation and signalling	OG0007560		14.6823	14.6969	9.99643	9.77865	9.84426	9.27446	9.52018	9.71527	9.52832	9.77311	9.84606	9.7449	10.23	10.6193	10.4768	10.5517	10.0709	11.0847	10.8818	10.6766	10.4964	10.7989	10.7958	9.1665	9.3937	10.4513	10.7109	9.26745	9.05348	10.3845	10.4053	10.8424	10.7518	9.84508	10.8771	9.89884	8.05804	9.5316	10.0431	9.95856	9.91099	green	-0.149991	-0.00679114	0.122219
Ec-00_001370	Mannosyl-oligosaccharide glucosidase, family GH63	Metabolism	OG0007561		9.17863	9.26413	8.45582	8.63922	8.68098	9.06153	8.63072	8.75478	9.30237	9.4731	9.78545	9.95477	9.87497	10.1102	10.0017	9.75097	9.71167	9.88336	9.68125	9.743	9.7601	9.83267	9.90782	9.94913	9.81978	9.27497	9.07616	9.73283	9.95798	9.56611	9.61343	9.95061	9.97279	10.3016	10.3806	10.0993	9.14525	10.1222	10.1854	10.3742	9.94451	brown	0.865191	0.338217	0.581257
Ec-00_001380	G-patch domain	RNA modification or binding	OG0007562		10.9161	11.102	10.0536	10.5761	10.2756	10.4694	10.0435	10.3094	8.81242	8.90506	8.26186	9.11104	8.71548	8.36308	8.46462	8.62776	9.06714	8.06458	8.36305	8.05708	8.29967	9.46024	9.61102	8.8323	9.24865	9.79883	9.73044	9.51882	9.01773	9.67233	9.64405	8.17313	8.14278	8.83866	8.79621	8.69271	9.48263	8.68389	8.47111	8.44076	8.82848	tan	-0.746232	-0.125566	-0.247279
Ec-00_001390	conserved unknown protein	Unknown	OG0019384		7.4102	7.34468	6.71283	7.25704	6.93816	8.79269	7.86341	7.47881	8.59509	8.93636	7.94466	8.07935	8.53933	8.59776	8.34858	8.5395	8.24371	8.63576	8.8148	8.1077	8.29967	8.96513	9.02172	9.09516	9.18823	7.89505	7.80963	9.34672	9.50726	8.20325	8.0119	8.35158	8.38839	8.58137	8.8035	8.00678	7.63986	7.8387	7.72227	7.35056	7.55615	purple	0.49855	0.0232218	0.0800408
Ec-00_001400	Tyrosyl-DNA phosphodiesterase	Metabolism	OG0007563		7.62055	7.24578	7.79184	7.35445	7.57858	7.7864	8.10582	7.77552	8.44139	8.26314	8.59703	8.5477	8.57118	9.17851	9.00119	9.1771	8.821	8.94633	8.72404	8.88188	8.86285	9.08699	9.05302	8.64279	8.76697	8.77888	8.74466	8.84193	8.51195	9.05925	8.98705	8.99738	9.20774	8.82091	9.67308	9.08183	8.10182	8.76171	9.43819	8.87484	8.87663	brown	0.886556	0.271447	0.362589
Ec-00_001410	ubiquitin domain-containing protein	Proteolysis	OG0004935		12.8229	12.7976	11.6357	11.6832	12.0408	12.1002	11.5476	11.7191	12.0712	12.2381	12.3301	11.2705	11.4043	11.5945	11.4318	12.1288	11.9181	12.0514	11.9738	11.6397	11.5043	11.0925	11.0143	11.9731	11.4816	11.5076	11.4503	11.7131	12.0794	11.8116	11.7597	11.6144	11.6429	11.5095	11.5737	12.1196	11.9747	12.1048	12.2625	12.1003	12.7241	red	-0.211983	0.158992	-0.0376059
Ec-00_001420	D123	Unknown	OG0004934		8.24599	7.82757	8.86543	9.49513	9.65184	9.62164	9.5605	9.99335	8.97713	9.14164	8.77217	8.65844	8.50377	8.49319	8.96896	8.60723	8.71995	8.45117	8.46848	8.39942	8.30825	8.72948	8.9951	9.24864	9.47182	9.08302	9.06445	9.39293	9.42921	8.69889	8.75753	8.51195	8.45956	8.54253	8.40999	9.05451	8.68503	8.3939	8.67789	8.79279	9.1465	grey	-0.415648	-0.134322	-0.297462
Ec-00_001430	DEAD box helicase	DNA or chromatin modification	OG0004933		12.9789	12.8782	12.1325	11.8778	12.0853	11.0496	11.5863	12.4579	10.1148	10.162	10.6305	11.0415	10.47	9.9121	11.0642	9.7188	11.9374	9.46274	9.57666	10.2107	10.0407	10.5372	10.2672	9.23763	8.837	10.7659	11.6487	8.97156	9.35728	11.4311	11.6917	10.7101	10.4766	10.8987	10.0341	8.69978	12.0497	11.5654	10.3837	11.6704	10.9453	tan	-0.518833	-0.137459	-0.136963
Ec-00_001440	ATP-dependent Clp protease adaptor protein ClpS	Proteolysis	OG0004932		14.569	14.525	10.8926	10.9771	11.3964	9.77426	10.2036	10.4006	10.8728	10.6204	10.4932	11.1449	10.8315	10.4398	10.6119	10.9095	10.772	11.0472	11.1799	10.3653	10.5271	11.4203	11.4295	10.0224	10.0008	10.2967	10.7906	10.0912	10.0961	10.4327	10.5511	10.6963	10.7055	11.1942	10.0001	8.78205	11.1872	10.5464	9.76059	10.5593	8.95347	green	-0.376291	-0.195713	-0.106244
Ec-00_001450	Thioredoxin-like fold	Redox	OG0004931		9.82778	9.96949	8.75095	7.98798	8.18245	9.54731	9.20844	8.66423	10.0306	9.89362	9.30858	9.6696	9.99082	10.4684	10.0101	10.0867	9.03594	10.0942	10.1898	9.85242	9.90015	10.6229	10.7552	10.7481	11.0967	9.37058	8.99707	11.0223	10.8923	9.02273	8.80115	10.1303	10.207	9.77477	10.0773	10.4428	9.6043	9.32007	9.00439	8.80958	8.12798	greenyellow	0.409349	0.117312	0.192541
Ec-00_001460	Ubiquitin-conjugating enzyme E2	Proteolysis	OG0008719		16.0642	16.086	10.2056	10.7089	11.7636	10.2716	10.1136	10.5344	10.9317	10.2948	10.3263	9.88406	10.4588	10.5412	10.0765	9.89849	9.71167	9.92334	10.0843	9.46679	9.67636	9.92835	10.0308	9.31742	9.33478	8.98911	8.61423	9.28855	9.20669	8.84461	8.92925	9.10506	9.44754	9.61548	9.68629	9.10333	8.38775	9.5815	9.28294	10.1153	10.0519	blue	-0.545801	-0.226596	-0.0633197
Ec-00_001470	Hypothetical protein	Unknown	NA		3.3074	3.55699	0	1.75464	1.43994	0	0	2.30503	0	0	0	0	0.462012	0	0	1.08252	0	0	0	0	0	0	0	0	0	0	0	0	0	0	0	0	0	0	0	0	0	0	0	0	0	NA	NA	NA	NA
Ec-00_001480	hypothetical protein	Unknown	OG0019385		5.50776	6.03601	3.25392	4.8823	5.27381	4.98949	3.68829	3.15114	1.4325	0	1.33033	7.16768	7.09285	5.13997	4.36768	1.69398	0	1.86945	0	5.78679	5.00153	1.94186	1.53617	6.61524	6.08678	4.13237	3.62553	5.64939	6.29142	4.39222	4.51618	5.77102	6.61824	6.3284	5.63878	5.30868	2.69475	5.54176	5.55793	6.04183	6.28807	turquoise	0.167993	0.622536	0.872278
Ec-00_001490	DNA glycosylase	DNA or chromatin modification	OG0006384		9.06336	8.95536	8.51875	8.48044	8.17392	8.68382	8.62711	9.11758	7.81562	7.72302	7.8341	7.75825	7.77095	7.53176	7.60077	7.50838	7.98526	7.46073	7.51746	7.35423	7.29563	8.05152	8.31443	7.72951	7.65282	8.67375	8.76651	7.47648	7.39792	8.22952	8.50165	7.7457	7.43703	7.51664	7.74366	7.93668	8.32757	7.08878	6.93275	7.36198	6.72678	tan	-0.662271	-0.209065	-0.393471
Ec-00_001500	Integral membrane protein TerC, riboswitch-linked	Membrane function and transporters	OG0006385		11.662	11.7239	10.0785	10.0834	10.2187	9.03759	9.39837	9.76405	10.1902	9.89959	10.3748	9.99753	9.91557	10.5116	10.4778	9.89002	11.3472	9.59487	9.39602	9.20842	8.99901	11.0803	11.1216	9.14142	9.10983	9.83759	10.174	9.33325	9.30829	10.4777	10.3936	10.3165	10.3274	10.6465	10.5014	9.08183	12.1911	10.5243	9.172	10.2069	10.3039	grey	-0.0503623	-0.123632	-0.07728
Ec-00_001510	expressed unknown protein	Unknown	OG0019386		8.77178	8.82439	7.2055	7.54075	7.93226	7.32822	6.88176	7.40244	9.16393	9.35645	9.93804	9.34726	9.55125	10.2779	9.85324	10.3304	10.1164	10.4204	10.1649	8.60367	8.77266	10.9223	11.0955	10.036	10.3699	9.36938	8.73878	10.1757	10.0879	9.92817	9.77529	9.2637	9.08877	9.61548	10.3511	9.75687	9.54739	9.17321	8.74793	9.0117	8.46682	brown	0.676318	0.0540369	0.13876
Ec-00_001520	hypothetical protein	Unknown	OG0019387		4.23263	0	1.27694	4.13922	4.54041	1.30166	2.98849	3.52499	2.6082	1.21055	1.33033	1.33977	3.15813	5.90591	4.98331	4.23908	1.8276	1.21845	1.16871	4.8369	4.72199	2.74071	3.1045	2.10452	2.3043	2.28059	0	1.32976	2.97141	0	3.91336	0	0	1.82521	1.08863	2.34107	1.90196	1.39397	1.05124	1.84612	2.03061	grey	-0.175549	-0.284406	-0.0366948
Ec-00_001530	HIT-like domain	Metabolism	OG0003270		6.17389	4.49436	6.11512	6.56666	6.379	7.21896	7.13668	6.97525	6.50866	6.22107	7.38894	7.22417	7.08083	7.45523	7.70343	7.07819	6.83859	7.48231	7.42619	7.57895	7.57004	7.14649	7.16509	7.66058	8.04231	7.23255	7.22227	7.90779	7.53731	6.99614	6.99997	7.26135	7.28483	7.22443	7.45957	7.71726	7.20399	7.08878	7.03065	6.84792	6.88581	red	0.574715	0.230578	0.229551
Ec-00_001540	hypothetical protein	Unknown	OG0000814		9.44125	9.43098	9.16634	8.3395	9.72667	8.19259	8.23005	8.32321	9.41438	9.4543	7.9178	7.74801	8.01993	7.79246	7.57329	7.56056	7.58654	7.15972	7.54665	8.64196	8.68966	7.17514	7.18406	9.41132	8.60126	9.02008	9.30929	8.86319	9.04041	8.92842	8.85327	8.80433	8.98576	8.20226	8.92775	8.94568	9.31605	9.54109	9.71714	8.98609	9.42431	lightyellow	-0.101848	0.621252	0.331358
Ec-00_001550	FYVE zinc finger	Transcription	OG0005966	TAP	15.7139	15.7158	11.5397	11.6023	11.4689	11.0772	10.3984	10.2777	10.5553	10.364	11.6915	9.42162	9.4882	9.73728	9.50087	9.90187	9.10437	9.98131	9.99535	9.71552	9.89446	10.1192	10.2312	10.4476	10.4425	9.54359	9.39405	10.6261	10.5405	9.24901	9.03835	9.81814	9.94885	9.13993	10.2995	10.3288	7.75402	9.07211	9.61825	9.24248	9.27662	blue	-0.624685	-0.112546	-0.107497
Ec-00_001560	Hypothetical protein	Unknown	OG0019388		8.64922	8.64196	4.28557	5.37034	5.56234	3.05756	2.574	4.27761	1.4325	3.35047	4.26118	6.36017	6.94158	6.6177	7.06805	2.12208	2.60856	1.21845	1.80579	6.68311	5.84361	1.27561	1.53617	6.03761	5.89318	5.62965	5.58838	5.25109	6.14565	7.17316	6.9643	6.53935	7.49948	8.14118	8.44617	4.88105	4.12294	6.3928	6.55904	7.37332	7.06273	turquoise	0.220278	0.669101	0.856916
Ec-00_001570	hypothetical protein	Unknown	OG0019389		8.7118	9.1319	6.9801	6.7369	7.12681	6.92054	7.93526	6.43305	7.0793	7.38021	7.34929	9.08383	8.70638	8.26186	8.68837	7.62733	7.2055	6.72561	6.96073	8.07245	7.81865	7.59123	7.68808	7.66997	7.76158	8.90534	8.9238	7.92137	8.02431	9.33529	9.36337	9.30444	9.50875	9.91896	9.48021	6.653	7.12131	7.78647	7.66244	8.25715	8.52034	turquoise	0.471897	0.487908	0.693176
Ec-00_001580	WD40 repeat	Protein binding or modification	OG0006224		6.75218	7.34468	10.6212	11.05	10.7461	10.1316	10.3378	10.7902	8.91754	9.22321	8.53946	9.26708	8.37846	8.34198	8.96704	8.80406	10.0624	8.27079	8.38476	8.61771	8.72856	9.33252	9.29916	8.59187	8.59392	9.78807	9.82714	9.58855	8.81347	9.71013	9.80016	8.03912	7.75527	9.24042	7.91956	9.20624	10.6008	9.41258	9.08066	9.72634	9.98607	greenyellow	-0.365124	-0.201376	-0.381646
Ec-00_001590	hypothetical protein	Unknown	OG0019390		10.3248	10.3489	9.90944	10.0385	10.3476	8.97176	10.1084	10.7827	7.55387	7.83521	8.33135	9.29372	9.07484	8.36657	8.65301	8.87102	9.7802	8.71989	8.52822	8.13236	8.21088	9.54776	9.54283	7.27431	7.03338	8.34734	8.47436	7.3683	7.04861	8.06644	8.17488	8.39337	8.35855	8.04442	7.95493	6.81809	8.19235	8.1177	7.80069	8.16231	8.33516	brown	-0.701882	-0.597459	-0.404918
Ec-00_001600	hypothetical protein	Unknown	OG0019391		5.7655	5.462	7.07452	6.95965	7.05428	6.86722	6.41325	6.84939	8.74545	8.59275	7.00256	7.47756	7.29363	7.07525	7.13793	8.35974	7.74924	7.31205	7.38369	8.66242	8.58049	6.3575	6.82164	7.7737	7.67616	8.39773	8.33514	8.08712	7.98199	7.53582	7.64874	8.14689	7.87417	8.05274	7.25839	9.14538	9.80746	8.07479	8.21411	8.25715	8.44569	blue	0.518383	0.43765	0.160353
Ec-00_001610	F-box domain	Proteolysis	OG0007514		5.9841	4.49436	5.66715	4.93924	5.20847	6.61027	6.13677	5.42779	6.77802	6.19543	4.82084	5.46773	5.39723	5.20374	5.02817	4.9625	4.92215	4.71217	5.39874	5.54376	5.40526	4.87873	4.88282	5.76735	5.77707	4.89069	4.93848	5.43899	5.19313	4.85373	4.99413	4.64405	5.54207	5.21408	4.97367	5.15249	5.61179	5.59132	4.74067	5.00647	5.24904	grey	-0.281786	-0.122555	-0.188467
Ec-00_001620	Bestrophin/UPF0187	Unknown	OG0006225		8.40596	8.0781	8.61616	8.05391	8.14802	7.41747	7.09546	7.69548	7.18415	7.56178	6.31759	6.14293	6.43769	6.24592	6.35594	4.47489	4.72763	6.37975	5.86821	5.83566	5.43693	2.39589	3.39248	4.84421	4.93284	4.86363	4.39691	4.36995	5.13812	5.37204	5.39334	5.20965	6.19424	6.26301	6.13916	5.15249	3.87637	6.30641	5.62216	6.71167	6.21004	pink	-0.65594	-0.200621	-0.106696
Ec-00_001625	lncRNA	Unknown	NA		0	3.55699	6.14444	5.73436	5.71129	6.73457	6.42993	6.03083	5.83471	6.45518	5.4894	4.46289	5.43549	5.82712	5.66137	3.73282	2.27029	5.09483	4.3017	3.83937	4.50014	3.92695	4.45303	5.97843	6.44307	4.38163	4.23923	5.64939	5.74662	4.36331	3.57789	4.30762	4.6326	4.90673	4.82867	4.97732	4.95927	3.80983	4.26522	3.80494	3.20613	green	-0.218884	-0.191341	-0.232311
Ec-00_001630	Potassium channel, inwardly rectifying, Kir	Membrane function and transporters	OG0008706		7.4102	7.02497	8.81161	8.43167	8.32799	8.86247	8.52603	8.31132	9.03902	9.05161	8.89659	7.56765	7.65955	7.5067	7.39926	7.66754	7.81605	7.91397	8.0733	7.60032	7.73833	8.14863	7.71443	8.06438	7.95339	8.03806	8.20895	7.75948	8.0801	8.60631	8.79608	7.96252	7.76065	7.8386	8.04795	8.57457	8.50108	8.24702	7.85515	8.00359	7.31653	turquoise	-0.302106	-0.147228	-0.562153
Ec-00_001640	putative decarboxylase family protein, lysine decarboxylase?	Metabolism	OG0008705		7.74547	7.52421	7.56124	7.61252	7.55249	6.27028	6.85731	7.37985	7.73737	6.78245	7.11717	7.67693	7.27265	8.13267	8.04277	6.7884	8.4471	6.84698	6.79225	6.98337	6.92331	8.39993	8.31443	7.17236	7.19725	8.39537	8.68475	7.00161	7.02606	8.17233	8.13733	7.17212	7.01467	8.91514	6.68342	7.31835	10.6273	8.02155	7.05413	7.88188	6.98286	grey	0.135529	0.0777884	-0.0143841
Ec-00_001650	hypothetical protein	Unknown	OG0019392		8.24599	8.47734	1.27694	2.18955	1.43994	2.77832	0.993432	0	0	1.21055	0	0	1.86482	3.93936	3.36776	4.9625	4.13517	0	0	2.74547	2.25147	3.45247	3.63244	0	0	0	0	0	0	0.502471	2.40555	0	0.853573	0.59332	0.808298	0	0	1.39397	0	0	0	blue	-0.305741	-0.262694	-0.0482291
Ec-00_001670	hypothetical protein	Unknown	OG0019393		12.3513	12.3804	10.2851	9.31862	8.72253	8.54924	7.93526	8.26893	9.40357	10.3654	9.19759	6.37355	6.35362	6.99642	6.13453	5.01331	4.79543	5.03769	5.11682	4.78807	7.62606	5.66491	5.48238	6.58579	6.72856	3.29572	1.66957	5.85201	6.36513	3.70957	4.78512	3.60899	4.60894	5.17398	4.80948	6.59349	2.35214	4.11103	4.62004	3.33394	4.36059	brown	-0.737009	-0.396549	-0.313675
Ec-00_001680	Hypothetical protein	Unknown	OG0000916		5.50776	6.90045	4.88093	4.40481	4.43009	6.45027	5.94124	5.47117	4.90137	5.02424	4.14247	5.82999	6.27141	5.6553	5.47953	5.0624	2.60856	5.03769	4.8927	5.25132	4.66965	4.65289	4.88282	6.92052	6.69239	4.77926	4.48386	5.62747	6.42381	4.91479	4.58826	5.6149	6.11247	6.18445	5.13656	5.63811	4.60088	5.13701	5.09767	5.6151	5.39724	turquoise	0.0543943	0.344811	0.52876
Ec-00_001690	conserved unknown protein	Unknown	OG0008708		6.49182	5.05783	1.94355	3.02206	4.54041	4.32529	0.993432	2.64517	2.6082	0	0	7.12875	6.72703	5.1722	5.28381	3.84928	3.3108	0	3.08553	6.9054	6.52702	2.39589	2.74432	6.7975	6.84849	4.80794	3.28166	6.07892	6.04459	1.96955	2.85841	6.40959	6.70449	6.04692	5.31048	6.36344	1.90196	5.43723	6.28921	5.89226	5.89796	turquoise	0.34888	0.565464	0.857017
Ec-00_001700	NIN-like transcription factor	Transcription	OG0000275	TAP	14.6547	14.5381	8.77926	9.09257	10.3111	9.06942	8.38775	8.68741	8.30077	9.00808	8.47951	9.39562	8.76389	7.96799	8.72061	9.76401	9.94785	9.18868	9.01253	8.18516	9.00694	7.34868	7.37783	6.67237	5.74211	8.01365	6.51944	5.73388	6.80551	6.66405	7.25375	4.91667	5.78312	7.68658	6.3398	6.49935	5.90328	6.18253	5.09767	7.92874	7.41547	blue	-0.587192	-0.439508	-0.270817
Ec-00_001710	expressed unknown protein	Unknown	OG0008275		6.34159	6.25526	9.13015	9.33196	9.26678	8.47396	8.7715	9.16788	8.54347	8.51195	8.12767	7.74286	7.60744	7.44207	7.71262	8.22071	8.38243	7.51407	7.48767	7.95019	7.77596	8.61911	8.34003	7.52238	7.11764	8.61208	9.17092	7.22969	7.20399	8.1386	8.37153	8.1651	7.9349	8.08283	8.01272	7.12174	8.32141	7.73227	7.55137	8.04671	6.9592	magenta	-0.381798	-0.391432	-0.55883
Ec-00_001720	Winged helix-turn-helix DNA-binding domain	Transcription	OG0008276	TAP	9.63132	9.88984	9.2797	8.93702	8.98402	9.55576	10.077	9.94609	10.2048	10.1769	10.7571	11.2083	11.2445	11.4724	11.2544	10.2466	10.8448	10.7082	10.7353	11.0944	10.9956	11.4918	11.6706	10.1444	10.5923	10.673	11.0264	10.5726	10.2295	11.4456	11.2103	11.0907	11.1619	11.4258	11.882	9.86778	10.4036	11.0257	11.1782	10.8785	10.822	brown	0.855618	0.177858	0.417284
Ec-00_001730	WD40 repeat	Protein binding or modification	OG0008274		11.1028	11.1438	9.8506	9.89295	9.84963	9.19374	9.21086	9.62213	8.91754	9.12815	8.76214	8.66662	8.60234	8.25059	8.16161	9.03677	9.41301	8.76899	8.8108	8.6212	8.47767	8.42401	8.38992	8.05367	7.76158	8.73476	8.47613	7.77452	8.31522	8.65781	8.75753	8.97461	8.85232	8.71487	8.19387	8.52764	9.37374	8.58339	8.2703	8.78857	8.51223	red	-0.738935	-0.24245	-0.323282
Ec-00_001740	2Fe-2S ferredoxin-type domain	Metabolism	OG0019394		8.5838	8.34024	6.82575	6.90353	6.97791	7.40506	7.90575	8.14717	6.1772	6.83322	7.11717	7.57346	7.50024	6.93199	7.11732	7.69892	7.74924	8.16804	7.82596	7.1948	7.15991	7.08741	7.41042	6.69093	6.38758	8.12324	8.29963	6.96712	6.04459	7.39293	7.5797	7.00694	6.49458	6.78625	5.74363	7.07899	8.34589	6.33578	6.05334	5.98385	5.32504	grey	-0.313027	-0.26326	-0.377151
Ec-00_001750	porphobilinogen synthase, putative chloroplast precursor	Metabolism	OG0008273		10.4216	10.4186	10.6611	10.7876	10.8313	11.3781	11.8801	11.9436	11.0134	10.6276	11.2755	12.0966	12.1205	11.9113	12.0633	11.1335	11.5219	11.7655	11.5858	12.7894	12.67	11.3947	11.1983	12.1785	11.8666	11.8612	12.5215	11.897	11.6669	12.2739	12.3046	13.2175	12.7684	12.1571	11.1373	11.2521	12.8575	12.2275	12.4257	11.9251	11.2501	blue	0.621567	0.473518	0.453113
Ec-00_001760	WD40/YVTN repeat-like-containing domain	Protein binding or modification	OG0008277		9.11058	8.92372	7.5935	7.76203	7.37031	7.93199	7.86953	7.57141	8.84477	8.86495	8.57428	7.21677	7.14764	7.20556	7.2304	8.08477	8.04218	8.50486	8.86972	8.24969	8.29103	7.21708	7.32751	7.7069	7.77461	7.34933	7.38172	8.0172	7.73098	7.67468	7.80564	7.60457	7.57774	7.06914	7.43473	8.46261	8.25186	7.86916	8.42234	8.27539	8.44143	red	-0.130262	0.0435934	-0.254214
Ec-00_001770	hypothetical protein	Unknown	OG0019395		6.49182	6.44554	2.39774	1.75464	1.43994	1.30166	1.99014	1.21034	0	0	0	1.33977	1.3276	5.53651	4.522	2.71999	0	1.86945	2.2462	3.74019	3.24242	0	1.53617	1.21426	1.57029	0	0	1.70947	3.65914	0	1.74182	0.485483	1.93523	1.33694	2.46123	3.7225	0	0	1.05124	1.20016	1.02048	blue	-0.167991	0.0772419	0.300657
Ec-00_001780	Hypothetical protein	Unknown	OG0019396		3.3074	0	1.27694	1.75464	2.14606	2.43173	0	1.85911	1.4325	2.30532	1.33033	3.11363	2.56243	2.71748	2.99857	1.08252	0	3.36299	3.08553	3.10569	4.30804	2.39589	2.74432	3.15725	3.03949	2.10685	2.16669	2.65481	3.80753	2.36915	2.29502	2.80752	2.73309	2.82875	2.88455	2.34107	2.97141	2.5568	2.8941	1.20016	2.35455	NA	NA	NA	NA
Ec-00_001785	lncRNA	Unknown	NA		7.91465	8.01942	7.65591	6.94583	6.69746	7.59195	7.0744	7.11855	8.87118	8.30571	7.50174	7.95356	8.40922	8.18496	7.70343	6.53379	6.70395	7.53487	7.63082	7.54996	7.50431	6.63007	6.40277	8.68967	8.5313	6.9011	6.54662	8.13452	8.57802	6.43314	6.34867	7.82929	8.13037	7.31017	7.67107	8.13754	7.56885	6.14983	6.32824	6.22817	5.99422	grey	-0.0476898	0.052704	0.109609
Ec-00_001790	expressed unknown protein	Unknown	OG0019397		6.62786	5.462	3.45454	3.392	3.25783	2.77832	2.98849	3.35014	0	2.92054	0	0.467569	0.811408	0.845388	0.41463	0	0	0	0	0	0	4.47995	4.88282	5.49912	5.4269	0	0.904947	6.28899	5.69037	0.874424	0	0.848085	0	0.59332	0.808298	1.60093	0	0	2.66937	1.20016	2.35455	blue	-0.426071	0.0420729	0.0373742
Ec-00_001800	PR1-like metalloprotease	Defence	OG0000130		0	3.55699	6.77039	6.3528	6.52032	7.56987	8.40473	7.96192	5.65178	6.57934	6.82121	6.78256	5.48496	5.76506	6.01334	6.49855	7.04765	8.0999	6.98935	5.6838	5.95716	7.96391	8.22563	6.9896	7.57548	6.22627	5.23435	6.81057	7.06345	4.70034	5.09654	5.78155	6.36639	5.72489	5.37719	7.45838	5.69037	5.38198	5.71344	4.26057	4.36059	pink	-0.0535281	-0.389184	-0.445557
Ec-00_001810	PR1-like metalloprotease	Defence	OG0000130		3.3074	0	4.17624	3.21885	2.97312	4.77465	4.84527	3.35014	4.02612	5.02424	2.47088	4.51212	4.16878	4.27241	4.77102	4.23908	3.64069	4.55817	4.10646	4.25317	4.00421	4.05581	3.1045	4.66812	4.9015	3.83087	3.81631	4.07834	4.51713	4.20936	4.41411	4.68949	4.06488	4.30906	4.1001	4.88105	3.87637	3.42868	1.65288	3.33394	1.02048	NA	NA	NA	NA
Ec-00_001820	Hypothetical protein	Unknown	OG0019398		0	0	0	0	0	0	0	1.21034	0	0	0	0.820122	4.44363	1.3749	0.41463	1.08252	0	0	2.2462	0	0.95637	0	0	2.79514	3.03949	0	0	3.87012	3.49372	0	0	2.07054	1.38623	0.59332	0	2.82785	0	3.42868	2.07619	1.84612	1.6122	NA	NA	NA	NA
Ec-00_001850	PR1-like metalloprotease	Defence	OG0000130		3.3074	5.05783	4.48212	4.03859	3.69951	4.2158	5.23511	3.68092	3.86722	3.82197	4.01311	6.65137	6.53486	6.82453	6.69882	5.44208	4.13517	5.52722	5.26466	6.52821	6.08257	8.07451	8.13101	7.76934	8.27415	7.17318	6.18077	7.12407	7.93435	6.37639	6.50581	7.61343	8.10311	6.94954	7.40626	8.02942	5.83574	6.82441	7.11119	5.95396	6.54802	red	0.7297	0.524945	0.63506
Ec-00_001840	Hypothetical protein	Unknown	NA		0	0	0	0	0	1.30166	0	0	0	0	0	0	0	0	0	0	0	0	0	0	0	0	0	0	0	0	0	0	0	0	0	0	0	0	0	0	0	0	0	0	0	NA	NA	NA	NA
Ec-00_001860	PR1-like metalloprotease	Defence	OG0000130		5.19374	4.49436	4.94899	5.94363	5.56234	5.89737	8.06903	7.23637	7.90014	8.7151	9.63967	9.53984	9.0013	8.29152	8.14643	10.2439	11.632	10.2454	9.32761	6.79853	6.66711	12.0931	12.087	5.38979	6.32988	5.97132	4.20551	7.0353	6.82306	6.19957	6.13267	6.74166	7.90121	6.41695	4.41149	3.48116	1.24404	7.84892	7.95828	6.01313	7.31653	lightyellow	0.176986	-0.654592	-0.330049
Ec-00_001870	WSC domain cellulose/chitin-binding protein	Cell wall and extracellular	OG0019399		0	3.55699	1.94355	1.12909	0	0	3.15823	0	0	0	2.47088	10.7424	9.96871	8.6502	10.3932	7.20382	5.95855	2.93259	4.10646	7.64898	10.5812	6.67089	6.89257	6.54558	7.65752	10.2088	9.20011	5.62747	4.47336	3.70957	7.19725	4.21742	2.89836	2.72156	0.808298	4.27056	6.2531	2.5568	3.0885	2.29071	1.02048	darkred	0.481339	0.0670768	0.30208
Ec-00_001880	Hypothetical protein	Unknown	NA		0	0	0	0	1.43994	0	0.993432	0	0	0	0	0	0	0	0	0	0	0	0	0	0	0	0	0	0	0	0	0	0	0	0	0	0	0	0	0	0	0	0	0	0	NA	NA	NA	NA
Ec-00_001890	WSC domain protein	Cell wall and extracellular	OG0019401		13.2871	13.2635	9.67837	9.47361	9.46514	8.5827	8.78128	8.24414	5.60217	5.38343	6.26173	5.23828	5.66746	4.92977	4.05736	0	0	0	0	0	0	4.56901	4.17809	5.22133	4.22703	5.30698	1.85496	4.78074	5.05147	2.7725	3.7965	3.0358	4.06488	4.06782	3.26876	0	0	1.39397	0	1.20016	0	brown	-0.768831	-0.257888	-0.15869
Ec-00_001885	hypothetical protein	Unknown	OG0019400		6.86662	7.02497	13.307	13.2486	12.7967	13.0355	12.288	11.667	1.4325	2.30532	3.33452	0.820122	1.09247	0	0	8.34493	8.2006	6.98938	6.4241	7.54996	7.25179	0	1.53617	0.731276	0	0	0	0.812953	0	0	0	0	0	0	0.808298	7.586	3.5788	7.03607	5.42021	7.78335	7.12784	black	-0.718569	-0.338322	-0.42866
Ec-00_001900	WSC and cellulose-binding domain protein	Cell wall and extracellular	OG0019402		9.9366	9.67858	9.55823	8.94399	9.34487	10.1853	11.2371	10.4311	6.66177	7.43603	10.5113	11.4018	10.9508	10.8628	10.4024	9.87293	11.7137	11.0821	10.2881	7.79822	8.04613	11.3164	11.2145	7.75178	8.46851	8.54553	7.15321	8.11101	7.8254	6.28684	7.00437	6.67545	8.59519	6.94359	4.03549	3.19117	2.35214	9.95011	8.8318	7.76625	7.36235	salmon	-0.290514	-0.699247	-0.294256
Ec-00_001910	Domain of unknown function DUF2431	Unknown	OG0000547		0	0	0	1.12909	1.43994	1.30166	2.574	1.21034	0	0	0	3.50271	3.5785	3.40067	2.87306	3.73282	2.60856	3.36299	3.6127	0.964221	1.93405	3.01882	1.53617	1.57547	0	0	0.522295	0.812953	1.61018	0	0	0.485483	0.489014	1.01252	0	0	0	0	0	0	0	NA	NA	NA	NA
Ec-00_001920	EsV-1-166	Cell wall and extracellular	OG0019403		4.79178	3.55699	1.94355	1.75464	1.43994	0	3.5729	0	0	2.30532	0	4.62832	3.21788	1.76139	3.22094	2.71999	2.27029	0	0	2.26425	0.95637	3.01882	2.74432	0.731276	2.09853	2.70321	2.16669	1.70947	0.752151	0	1.35786	0	0	0	0.460032	0	0	0	0	1.20016	0	NA	NA	NA	NA
Ec-00_001930	Domain of unknown function DUF2431	Unknown	OG0000547		7.07143	7.1396	8.9509	9.62878	9.23432	8.31711	8.61622	9.14463	7.73737	7.98492	7.42753	8.37715	7.87436	7.38131	7.92319	7.43572	8.14321	6.97424	7.46747	7.48252	7.61917	8.35054	8.60232	7.72051	8.03871	8.71786	8.87504	8.3236	7.96233	8.87693	8.77049	7.50323	7.47679	8.38241	7.69219	7.57065	8.54404	7.71001	7.50102	7.74022	8.12267	greenyellow	-0.424089	-0.142966	-0.260267
Ec-00_001940	NADH:ubiquinone oxidoreductase complex I	Metabolism	OG0006965		7.68436	8.13447	10.3806	10.2822	10.34	10.1165	10.9308	10.8612	9.46382	9.28531	10.4408	10.3743	9.99669	10.1713	10.6557	10.2936	11.0409	10.1709	9.59773	10.1224	10.0446	10.6358	10.439	10.2206	10.0579	10.6119	11.2601	9.64009	9.84337	10.6128	10.7806	10.4842	10.1234	10.5857	9.61345	9.84882	11.2049	10.5147	10.012	10.7133	10.8047	blue	0.227768	-0.0633218	-0.11755
Ec-00_001950	Pentatricopeptide repeat	RNA modification or binding	OG0003272		9.64742	9.43098	11.0206	10.6904	10.8833	10.7293	10.8541	11.0572	10.9955	11.2667	10.9528	9.04567	9.07786	9.16055	9.47343	11.0115	10.9312	10.8098	10.5081	10.0988	10.0523	9.73502	9.51687	9.7097	9.1719	10.6914	10.7509	9.38479	9.48401	10.0231	10.1082	9.50283	9.276	9.0514	8.89626	10.6686	10.3919	10.0881	9.92716	10.3122	10.8277	midnightblue	-0.464152	-0.370444	-0.744731
Ec-00_001960	Importin subunit beta	Cellular regulation and signalling	OG0008707		8.82937	8.60253	10.5923	10.5316	10.7802	10.1279	10.8763	11.3435	10.6845	10.7906	11.0122	11.5004	11.4345	11.6071	11.9129	10.8007	12.2783	11.262	11.2511	11.4701	11.4127	11.5627	11.3892	10.1266	10.0036	11.5325	12.0219	10.1672	10.2163	11.8445	11.9929	11.6479	11.4491	11.7516	11.3165	10.5928	12.3677	11.8815	11.6634	11.7267	11.6029	blue	0.545733	-0.00509781	0.0417632
Ec-00_001970	Hypothetical protein	Unknown	OG0019404		5.7655	5.462	8.24865	8.70636	8.66889	8.03228	8.66635	9.05481	9.43931	8.91687	9.39874	8.26493	7.95558	8.39758	8.77864	8.81125	9.05681	8.64535	8.74517	7.96124	8.43519	9.34833	9.46738	8.91749	9.12687	8.84263	8.34097	9.25141	8.99663	7.87744	8.04002	8.12845	7.81077	8.54842	7.81035	9.3836	9.82498	8.31497	8.22965	9.30597	8.79212	green	0.203112	-0.197624	-0.34861
Ec-00_001985	lncRNA	Unknown	NA		8.80086	7.8944	10.9518	11.2132	11.0252	11.0899	11.073	11.5133	11.5686	10.7581	11.2161	10.5788	10.3349	10.9072	11.0801	10.5982	10.6876	10.207	10.2664	9.65213	10.0042	11.7356	11.9188	11.9707	12.1507	12.0393	11.5201	12.2439	12.0397	11.0029	11.0376	10.3815	10.0697	10.8303	10.3457	11.8228	11.4873	9.976	9.88032	10.0966	9.74279	green	0.027652	-0.067162	-0.261112
Ec-00_001980	Hypothetical protein	Unknown	OG0019405		0	0	9.32202	9.7351	9.7061	9.63499	9.61073	10.1043	0	1.85938	2.0105	0.467569	1.09247	0.845388	1.22146	5.71193	4.50275	4.63722	4.55249	4.01936	3.82435	1.27561	1.53617	0.731276	1.20982	1.07211	0	0	0	0	0	0	0	0.59332	0	5.80481	6.59697	6.01105	5.74262	5.98385	7.23022	black	-0.567246	-0.314802	-0.422965
Ec-00_001990	hypothetical protein	Unknown	OG0019406		4.79178	3.55699	3.25392	3.392	3.25783	3.49261	2.574	2.64517	1.4325	3.68126	2.81935	5.99493	6.07539	5.2944	5.53238	2.71999	1.1857	1.21845	1.16871	5.09952	4.77251	3.62854	3.83811	5.71392	6.04435	4.49178	3.98478	5.8137	6.36513	4.24149	3.48024	6.10033	6.49458	5.4673	6.06016	4.10995	1.24404	3.6318	4.00111	4.82022	5.49919	turquoise	0.381919	0.520993	0.84028
Ec-00_002000	Leucine rich repeat protein	Cellular regulation and signalling	OG0004383		9.89675	10.0741	9.33479	9.33196	9.25064	9.02953	9.00367	9.22285	9.82439	9.47043	10.0597	9.89744	9.9649	9.9521	9.65956	9.47776	9.66032	9.62185	9.55288	9.60182	9.65632	9.8394	9.99905	9.99278	9.61035	9.73959	9.93008	9.68588	10.0211	9.61522	9.73219	10.2752	10.0745	9.76299	10.1516	9.43536	10.1086	9.66199	9.73903	9.23318	9.24517	black	0.474874	0.265657	0.334773
Ec-00_002010	3-Dehydroquinate Synthase	Metabolism	OG0004382		11.638	11.4847	11.3115	11.5072	11.4913	10.9643	11.5197	11.631	10.0469	9.82211	11.009	10.8591	10.8814	10.7737	10.8626	11.0927	10.6685	11.1187	10.8951	10.4294	10.3953	11.2286	11.281	11.1079	11.232	10.6103	10.9473	10.9218	11.0575	10.5176	10.5593	10.7368	10.6048	10.5173	10.2625	10.3781	10.5398	10.222	10.018	10.1254	9.83341	brown	-0.64314	-0.370968	-0.30593
Ec-00_002020	Ankyrin-repeat protein similar to EsV-1-21	Membrane function and transporters	OG0019407		5.9841	6.76415	6.69313	6.28852	6.547	6.1857	6.03143	6.53877	7.37345	7.09137	7.29466	6.33986	6.45642	6.64092	6.41343	7.38839	7.01957	7.34775	7.28323	6.64249	7.01008	7.14649	7.18406	6.92837	7.01885	6.68624	5.87242	7.20029	7.02606	5.59982	6.05849	6.7998	6.44867	6.69002	6.11591	8.32302	7.35635	5.59132	6.09919	5.4957	5.20948	purple	-0.0145116	-0.220915	-0.400456
Ec-00_002030	DEAD box helicase	DNA or chromatin modification	OG0004381		6.34159	6.25526	10.3305	10.6072	10.4251	9.63765	9.37272	10.6392	7.8585	8.38157	8.00545	8.70814	7.89281	7.68485	8.69766	7.89458	9.37197	7.95312	7.84174	8.33714	8.31253	9.18182	9.46738	7.76934	8.16288	9.63044	10.0394	8.9116	7.97808	9.75186	9.84192	7.51274	7.29599	9.08558	8.28702	8.08449	9.19663	8.88606	8.85538	9.1793	8.98895	greenyellow	-0.300307	-0.180357	-0.314054
Ec-00_002040	Thioredoxin-like fold	Redox	OG0004380		10.981	11.007	10.4276	10.6494	10.4711	10.8069	11.173	11.101	11.2929	10.9264	11.7364	12.2924	12.4313	12.7939	12.4896	11.1598	11.9047	11.599	11.65	12.1164	12.0807	12.3531	12.4868	12.123	12.1261	11.9451	12.3459	12.2135	12.0906	12.632	12.5661	12.7751	12.77	12.8206	12.966	11.4167	11.9125	12.7142	12.8672	12.5638	12.0325	brown	0.892353	0.454001	0.648038
Ec-00_002050	Myosin light chain kinase (MLCK)	Cytoskeleton and flagella	OG0019408		15.0342	14.9671	11.3315	10.9539	11.0719	10.5576	10.9257	11.059	10.6018	10.8087	10.7734	9.9329	10.3736	10.1175	9.98658	10.507	10.2997	10.8704	10.7183	10.6263	10.4487	10.4923	10.5065	9.26266	9.40632	9.66416	9.98948	9.47039	9.34671	9.89699	9.96152	10.5054	10.4917	10.0305	10.486	9.99397	9.29735	10.0686	10.5529	10.2885	10.3816	green	-0.541146	-0.186867	-0.130122
Ec-00_002055	lncRNA	Unknown	NA		0	0	3.78756	2.79411	4.03719	3.05756	1.99014	3.52499	2.6082	2.92054	4.01311	4.43763	3.53218	3.03046	3.93708	2.45179	2.88239	2.65715	2.58314	3.83937	3.3791	3.25187	3.83811	5.24664	5.40471	5.38517	6.14564	4.52025	4.92719	4.93458	5.11293	3.60899	3.712	3.97753	4.88477	5.38086	5.13812	3.6318	4.34351	4.52733	3.49645	blue	0.459331	0.459489	0.298445
Ec-00_002060	expressed unknown protein	Unknown	OG0000906		7.33267	7.60624	10.069	10.3882	10.3033	10.0119	9.37056	9.93258	9.61527	10.4232	9.92461	9.32505	9.30146	8.69804	9.32854	8.78225	10.2747	9.18868	9.30502	9.85982	9.44093	7.95568	7.57761	8.42734	7.85044	10.0149	10.6574	7.94814	8.19909	11.0014	10.9927	10.0421	9.74348	9.96448	9.67108	8.7887	11.0336	10.2779	9.89664	10.9071	10.9164	yellow	0.0522002	0.108922	-0.0811972
Ec-00_002070	MIF4-like, type 1/2/3	Protein synthesis	OG0008453		9.84184	9.90613	10.1829	10.0991	10.0471	10.2578	9.70281	10.1765	10.5618	10.9048	10.7174	9.94416	10.071	10.3262	10.1138	10.3796	10.4766	10.4385	10.3556	10.2917	10.1355	9.92835	9.93608	10.7088	10.2056	10.2628	10.1174	9.92141	10.7755	9.99272	10.0375	10.278	10.3943	10.0625	10.2132	10.4905	9.92789	10.5651	10.6114	10.8196	11.5676	grey	0.284551	0.115144	0.0748559
Ec-00_002080	hypothetical protein	Unknown	OG0000896		4.79178	3.55699	8.78858	8.47564	8.46018	8.2423	7.708	8.12697	8.33913	8.8527	7.80508	7.00523	6.54072	6.03423	6.90928	8.2044	8.54881	7.48231	7.30617	8.24065	7.82465	6.82349	6.15601	6.87257	7.12444	8.62019	8.03751	7.05185	7.19728	7.62986	7.94485	6.61785	6.81201	7.69369	7.1094	8.51166	8.81785	7.94736	7.71493	8.66025	9.26701	yellow	-0.0225005	-0.0370827	-0.316399
Ec-00_002090	Exo-1,3-beta-glucanase, family GH5	Metabolism	OG0008123		7.62055	7.24578	8.60038	8.8469	8.28109	9.41733	10.034	10.0427	11.4173	10.6805	9.41804	10.5939	10.1188	9.6963	10.5568	10.4813	11.7894	9.69527	9.6139	9.88616	9.77256	9.99214	9.9856	8.3448	8.57169	10.3274	10.9213	8.61291	7.9504	10.9477	11.2029	10.0394	9.83044	10.7366	9.94673	9.17105	10.6021	10.6813	9.57834	10.7808	10.3872	blue	0.465233	-0.127598	-0.127636
Ec-00_002100	WD40 repeat	Protein binding or modification	OG0008122		3.3074	3.55699	4.80951	5.14686	4.18038	4.77465	5.30909	4.90238	3.86722	4.54488	4.37085	5.05108	4.90999	5.37969	5.23363	5.15582	4.92215	4.78342	4.76608	4.25317	4.43891	4.80731	5.13768	5.58098	6.16806	5.42274	5.77234	5.97861	5.80075	5.21907	4.95831	4.89743	4.88984	5.13274	4.97367	6.21338	5.02138	3.80983	4.26522	4.44377	4.20836	red	0.247497	0.184988	0.100829
Ec-00_002110	hypothetical protein	Unknown	OG0019409		6.34159	4.49436	2.74265	3.93041	4.73857	2.43173	0.993432	1.85911	1.4325	3.35047	2.81935	4.276	4.6744	3.1647	2.73558	1.08252	0	1.21845	0	2.93679	0	1.27561	1.53617	4.23442	4.0667	1.07211	0	3.94292	4.00492	1.62442	1.90123	4.27817	5.03893	4.8314	4.03549	2.82785	1.24404	3.1922	1.65288	4.26057	4.03816	turquoise	-0.100956	0.298256	0.557587
Ec-00_002120	Hypothetical protein	Unknown	OG0000244		0	0	3.92908	3.54657	4.54041	5.17645	3.15823	3.15114	0	0	0	0.467569	0	0	0	2.71999	1.8276	1.21845	2.2462	0	2.25147	0	0	0	0	0	0	0	0	0	0	0	0	0	0	1.60093	2.97141	1.39397	1.05124	1.84612	1.6122	NA	NA	NA	NA
Ec-00_002130	telomerase reverse transcriptase	RNA modification or binding	OG0019410		0	0	0	0	0	0	0	0	0	0	0	0	0	0	0	0	0	0	0	0	0	0	0	0	0	0	0	0	0	0	0	0.485483	0	0	0	0	0	0	0	0	0	NA	NA	NA	NA
Ec-00_002140	Ribonuclease H-like domain	RNA modification or binding	OG0019411		6.86662	7.34468	7.91606	7.77773	7.60421	6.93788	7.22533	7.6204	7.61766	7.89219	7.81482	6.60106	6.10733	5.72215	6.58335	6.81729	7.61496	7.07706	7.09849	6.64249	6.73237	6.69087	6.26697	6.70925	6.14147	6.73185	6.90276	6.70987	6.89947	7.29299	7.4916	6.43649	6.65913	6.8576	6.28526	6.53142	7.92625	7.2206	7.14437	6.89587	7.91086	midnightblue	-0.479183	-0.181416	-0.531933
Ec-00_002150	Hypothetical protein	Unknown	NA		0	0	0	0	0	0	0	0	0	0	0	0	0	0	0	0	0	0	0	0	0	0	0	0	0	0	0	0	0	0	0	0	0	0	0	0	0	0	0	0	0	NA	NA	NA	NA
Ec-00_002160	DNA-directed RNA polymerase, subunit 2	Transcription	OG0019412		6.17389	6.44554	7.14875	6.98691	6.67345	6.47424	6.74184	7.2858	5.74614	5.97201	7.19379	7.58788	7.29015	7.68485	7.85428	7.0662	8.06982	6.91201	6.88657	6.88233	6.49729	7.78027	8.14076	5.78473	6.41003	7.60355	8.13027	6.28899	5.86991	8.20529	8.35096	7.13565	6.72664	7.51664	7.27248	6.653	7.84271	7.4925	7.26996	7.62166	7.27881	cyan	0.315842	-0.0889109	0.0338569
Ec-00_002170	conserved unknown protein	Unknown	OG0019413		6.17389	6.25526	4.88093	4.82303	4.73857	3.96821	5.03163	4.54453	4.16924	4.6239	4.47278	5.30963	5.33113	5.74377	5.64226	3.84928	4.86018	4.29112	3.45744	4.68517	4.95854	5.07395	5.60009	4.4675	4.86945	5.24541	5.05665	4.74046	4.75507	4.44837	4.38742	5.49205	5.2525	5.4838	5.88786	4.41507	4.95927	4.11103	4.34351	4.15943	4.03816	yellow	-0.048382	0.0738352	0.328666
Ec-00_002180	tRNA Ala	Protein synthesis	NA		0	0	2.74265	3.02206	2.14606	1.97463	1.5762	2.64517	0	1.21055	0	0.820122	0.811408	0.845388	1.41402	0	0	0	0	1.53706	1.93405	0	0	0.731276	0.728178	1.07211	1.66957	0	1.90196	0.874424	0.83311	1.13761	1.59332	1.82521	1.525	2.34107	0	0	0	0	0	NA	NA	NA	NA
Ec-00_002190	hypothetical protein	Unknown	OG0000363		3.3074	0	1.94355	2.52327	2.14606	0	1.5762	1.85911	0	0	1.33033	0.467569	0	0	0	0	0	0	3.08553	0.964221	0.95637	1.27561	0	1.57547	1.20982	0	0	2.00978	1.24404	0	0	0	0	0	0.460032	0	0	0	0	0	0	NA	NA	NA	NA
Ec-00_002200	S-adenosyl-L-methionine-dependent methyltransferase	Metabolism	OG0019414		3.3074	0	0	0	0	0	0	0	0	0	0	0	0	0	0	0	0	0	0	0	0	0	0	0	0.728178	0	0	0.812953	1.90196	0	0	0.485483	0	0	0	0	0	1.39397	1.05124	0	0	NA	NA	NA	NA
Ec-00_002210	Mannosyl-oligosaccharide 1,2-alpha-mannosidase, central fragment, family GH47	Metabolism	OG0019415		0	0	1.27694	0	0	0	0	0	0	0	0	0	0	0	0	0	0	0	0	0	0	0	0	0	0.728178	0	0	0	0	0	0	0	0	0	0	0	1.24404	0	0	0	0	NA	NA	NA	NA
Ec-00_002220	Hypothetical protein	Unknown	NA		0	0	6.67314	6.3736	5.33632	4.92137	5.27258	5.87806	0	3.15146	3.09981	3.34861	3.82895	0.845388	5.87287	5.51442	1.8276	5.4851	5.70521	2.74547	5.52795	4.80731	4.68387	7.75178	7.85044	4.80794	4.61805	7.66581	7.95836	4.52868	1.35786	5.09612	4.87007	4.34562	2.80924	7.91253	5.76488	3.96828	3.67755	3.33394	0	grey	-0.0617718	0.145808	-0.0503057
Ec-00_002230	Hypothetical protein	Unknown	OG0019416		7.48378	7.24578	4.65508	3.81345	4.43009	4.69528	4.79466	4.69847	2.6082	2.30532	2.81935	3.40183	3.21788	2.53119	3.27156	4.90983	4.50275	3.69406	3.08553	2.52483	3.61883	3.25187	3.63244	2.9262	4.17554	3.77387	3.51976	3.33366	3.20346	3.79865	3.75535	2.80752	2.54642	4.19348	2.95611	4.77789	5.02138	3.1922	1.65288	4.15943	2.61893	tan	-0.543138	-0.0352018	-0.137977
Ec-00_002240	Putative cytoskeleton-associated protein	Unknown	OG0000346		0	0	1.27694	2.18955	1.43994	1.97463	1.5762	1.85911	2.13694	2.64548	2.47088	3.50271	3.43483	2.06591	2.93718	0	0	0	1.16871	0	0	0	1.53617	3.15725	1.20982	0	0	3.09897	3.09209	0	0	4.21742	3.91858	3.83052	3.61673	0	0	0	1.05124	1.84612	2.03061	NA	NA	NA	NA
Ec-00_002250	EF-hand domain pair	Cellular regulation and signalling	OG0000443		0	0	0	0	0	1.30166	0	0	0	0	0	0	0	0	0	0	0	0	0	0	0	1.27561	0	0	0	0	0	0	0	0	0	0	0	0	0	0	0	0	0	0	0	NA	NA	NA	NA
Ec-00_002260	Thioredoxin-like fold	Redox	OG0019417		0	3.55699	1.27694	1.12909	0	0	0.993432	0	0	0	0	0.820122	0	0	0	0	0	0	0	0	0	1.27561	2.26318	0	0	0.633432	0	0	1.24404	0	0	0	0	0	0	0	0	0	0	0	0	NA	NA	NA	NA
Ec-00_002270	Ankyrin repeat-containing domain	Membrane function and transporters	OG0019418		0	0	0	0	0	1.97463	0.993432	0	0	1.85938	0	0.467569	0.462012	0	0	0	0	0	0	0	0	0	0	0	1.20982	0	0	0	0.752151	0	0.475874	0.848085	0	0	0	0	0	0	0	0	0	NA	NA	NA	NA
Ec-00_002280	hypothetical protein	Unknown	OG0019419		10.0499	9.92223	4.65508	5.4895	5.14003	5.9324	5.76844	4.06756	4.72722	4.17675	4.14247	9.7494	9.38853	9.90851	10.5958	6.13545	6.55544	5.72114	5.48168	9.50317	9.67304	9.00956	9.39186	10.6359	10.3359	9.25167	10.0795	10.4422	10.511	11.1856	11.0937	12.1621	11.4614	11.2249	11.7204	9.80029	9.59412	10.4081	11.2693	10.6283	11.2056	turquoise	0.686854	0.763057	0.89075
Ec-00_002290	expressed unknown protein	Unknown	OG0019420		0	0	2.39774	2.79411	2.14606	2.43173	0.993432	2.92022	0	0	0	0.467569	0	0.845388	0	1.08252	0	4.08096	2.8561	3.3937	4.37496	0	0	0	0	0	0	0	0	0	0	0	0	0	0	4.54642	0	7.5687	7.37621	4.82022	5.28754	black	0.0247397	0.107271	0.0873143
Ec-00_002300	Hypothetical protein	Unknown	NA		0	0	0	1.12909	1.43994	2.77832	0.993432	1.21034	0	0	0	0	0	0	0	0	0	0	0	0	0	0	0	0	0	0	0	0	0	0	0	0	0	0	0	0	0	0	0	0	0	NA	NA	NA	NA
Ec-00_002310	conserved unknown protein	Unknown	OG0019421		0	0	0	0	1.43994	1.30166	0	1.85911	0	0	0	2.02227	0	0	0	0	0	0	0	0	0	4.47995	0	2.49076	1.20982	2.92885	0.522295	0.812953	1.61018	0	0	0.485483	1.59332	0	4.16195	0	4.23203	0	1.05124	0	0	NA	NA	NA	NA
Ec-00_002320	Flavin monooxygenase-like	Metabolism	OG0000303		0	0	3.25392	2.52327	3.69951	1.97463	3.89461	2.64517	2.6082	1.85938	1.33033	0.820122	0.462012	1.3749	1.22146	1.08252	2.27029	0	1.16871	0	0.95637	2.39589	1.53617	1.57547	1.20982	0	0	1.32976	2.14454	0.502471	0.475874	1.37863	0.489014	1.82521	1.08863	0	1.24404	2.0895	4.85199	0	0	NA	NA	NA	NA
Ec-00_002330	hypothetical protein	Unknown	OG0019422		4.23263	5.462	5.13578	5.82779	5.80268	4.6113	4.98725	5.33692	5.26233	5.08136	5.83391	5.22357	4.99783	5.2648	5.72632	5.28552	5.34045	4.91615	5.31075	5.35552	5.72036	5.62393	5.41972	4.87699	5.023	5.13658	4.76417	4.81992	5.65162	5.16983	5.16099	5.19396	5.28272	5.88248	5.83188	5.30868	5.44051	5.32452	5.8268	6.06997	6.65497	grey	0.193226	0.0457605	0.160862
Ec-00_002340	conserved unknown protein	Unknown	OG0019423		0	0	0	0	0	0	0	0	0	0	0	0	0	0	0	0	0	0	0	0	0	0	0	0.731276	0	0	0	0	0	0	0	0	0	0	0	0	0	0	0	1.20016	0	NA	NA	NA	NA
Ec-00_002350	Hypothetical protein	Unknown	OG0019424		4.79178	3.55699	1.94355	1.75464	0	0	1.99014	1.21034	0	1.21055	1.33033	0	0.462012	1.3749	0.999185	0	0	0	0	0	0	1.27561	2.26318	1.86411	1.20982	0	0	1.70947	1.90196	0	0	0	0	1.60163	0.460032	0	0	0	0	0	1.02048	NA	NA	NA	NA
Ec-00_002360	hypothetical protein	Unknown	OG0019425		3.3074	3.55699	5.13578	4.93924	4.73857	5.44257	4.68778	4.62355	3.68863	5.81247	4.14247	4.51212	3.82895	3.60341	3.69893	3.84928	4.13517	4.38574	4.10646	4.25317	4.37496	3.25187	3.39248	3.61139	2.48435	3.71452	3.40562	1.32976	3.30684	3.99991	4.33251	4.1212	4.56042	4.30906	4.27821	4.66679	3.4033	4.47015	4.68162	5.00647	4.68292	grey	-0.284211	-0.218008	-0.21429
Ec-00_002370	hypothetical protein	Unknown	OG0000176		0	0	0	0	0	0	0	0	0	1.21055	0	0	0	0	0	0	0	0	0	0	0	0	0	2.79514	0.728178	0	0	0	0	0	0	0.485483	0	0	0.460032	0	0	0	0	1.20016	0	NA	NA	NA	NA
Ec-00_002380	conserved unknown protein	Unknown	OG0019426		0	0	0	1.75464	0	0	0	0	0	0	0	3.04837	2.89081	1.76139	1.41402	0	0	0	0	0	1.52649	0	0	2.49076	1.20982	0	0	2.4701	1.90196	0	0.475874	2.07054	2.54642	1.60163	1.85957	0	0	1.39397	1.05124	0	0	NA	NA	NA	NA
Ec-00_002390	telomerase reverse transcriptase, putative	RNA modification or binding	OG0019427		0	0	1.27694	1.12909	0	0	0	0	2.13694	1.21055	2.81935	0.467569	0.462012	0	0.736313	0	0	1.21845	0	0	0	0	0	0	0.728178	0	0	1.70947	1.24404	0	0.83311	0	0.489014	0.59332	0.808298	1.60093	0	1.39397	0	2.29071	1.02048	NA	NA	NA	NA
Ec-00_002400	hypothetical protein	Unknown	OG0019428		0	0	2.39774	2.79411	2.97312	2.77832	3.44747	3.82163	0	0	2.47088	0.820122	1.86482	0.845388	2.5836	1.08252	1.1857	0	0	0	0.95637	2.39589	2.74432	2.10452	1.85845	0.633432	0.904947	2.25822	2.14454	1.41498	0.475874	1.37863	0.489014	2.60577	1.32325	0	0	3.1922	1.05124	1.84612	2.61893	NA	NA	NA	NA
Ec-00_002410	hypothetical protein	Unknown	OG0019429		0	0	0	0	0	0	0	0	0	0	0	0	0	0	0	0	0	0	0	0	0	0	0	0	0	0	0	0	0	0	0	0	0	0	0	0	0	0	0	0	0	NA	NA	NA	NA
Ec-00_002420	expressed unknown protein	Unknown	OG0019430		0	0	4.94899	5.56381	4.8283	4.6113	3.89461	4.90238	3.86722	3.52533	3.09981	0.820122	0	1.3749	0.736313	0	1.8276	1.21845	0	0	0	1.27561	0	2.10452	3.15032	0.633432	0.904947	2.4701	2.35214	0	0.475874	0.485483	0	1.01252	1.32325	0	1.24404	1.39397	0	0	1.02048	brown	-0.722944	-0.394488	-0.531009
Ec-00_002430	conserved unknown protein	Unknown	OG0019431		3.3074	0	1.27694	1.12909	2.14606	1.30166	0	0	1.4325	0	0	0	0	0	0	0	0	0	0	0	0	0	1.53617	0	0.728178	0	0	0.812953	0	0	0	0	0	0	0	0	0	0	0	0	0	NA	NA	NA	NA
Ec-00_002440	hypothetical protein	Unknown	OG0000060		0	0	0	0	0	0	0	0	0	0	1.33033	0	0.462012	0	0	0	0	0	0	0	0	0	0	0	0	0	0	0	0	0	0	0	0	0.59332	0	0	0	0	1.05124	0	0	NA	NA	NA	NA
Ec-00_002450	expressed unknown protein	Unknown	OG0019432		0	0	0	0	1.43994	0	0	0	0	0	0	0	0	0	0	0	0	0	0	0	0	0	0	0	0	0	0	0.812953	0	0	0	0	0	0	0	0	0	0	0	0	0	NA	NA	NA	NA
Ec-00_002460	Hypothetical protein	Unknown	NA		0	0	0	0	0	1.97463	1.5762	0	0	0	0	0	0	0	0	0	0	0	0	0	0	0	0	0	0	0	0	0	0	0	0	0	0	0	0	0	0	0	0	0	0	NA	NA	NA	NA
Ec-00_002470	Glycine cleavage T-protein-like, N-terminal	Metabolism	OG0019433		0	4.49436	3.63064	4.23329	3.25783	3.82641	5.07469	4.62355	4.41885	4.96477	4.74138	5.97751	5.33113	6.03423	5.57331	5.44208	5.38514	6.10171	5.48168	5.09952	5.08384	6.40666	5.9934	4.90904	5.31238	3.12392	4.30438	4.56707	4.75507	4.07316	3.62434	5.20965	5.2976	5.39937	5.04105	4.54642	4.42821	4.57241	4.79741	3.80494	3.73802	pink	0.418851	-0.286146	-0.0667398
Ec-00_002480	Notch domain	Cellular regulation and signalling	OG0000022		0	0	4.17624	3.68618	3.25783	3.96821	4.98725	4.27761	7.92052	7.53135	5.62841	4.09395	4.33989	0	1.41402	0	0	4.91615	2.58314	2.74547	2.51149	1.27561	0	6.58579	6.87294	0.633432	3.62553	3.62668	2.35214	1.41498	3.7965	0	1.14434	2.92852	1.32325	3.48116	3.5788	0	0	3.33394	3.35858	grey	-0.219496	-0.128583	-0.296251
Ec-00_002490	expressed unknown protein	Unknown	OG0000274		3.3074	0	6.69313	6.70442	6.93816	7.08525	6.70121	6.16896	6.98569	6.74759	7.03624	4.98287	4.83566	5.07325	4.90531	5.15582	4.58167	5.20273	5.00911	4.78807	4.61533	4.47995	5.13768	6.20186	6.44307	5.87974	4.97896	6.33028	6.42381	4.57985	4.88389	4.7972	4.80908	5.15351	4.57954	5.51521	5.61179	3.6318	4.34351	3.80494	4.03816	green	-0.284196	-0.270855	-0.459507
Ec-00_002500	expressed unknown protein	Unknown	OG0019434		0	0	0	0	0	1.30166	0.993432	0	0	0	0	0	0	0	0	0	0	0	0	0	0	0	0	0.731276	0	0	0	0	0	0	0	0	0	0	0	0	0	0	0	0	0	NA	NA	NA	NA
Ec-00_002510	hypothetical protein	Unknown	OG0019435		0	0	0	1.12909	1.43994	1.30166	0	1.85911	0	0	0	0.467569	0	0.845388	0	0	0	0	0	0	0	0	0	0	0	0	0	0	0	0	0	0	0	0	0	0	0	0	0	0	0	NA	NA	NA	NA
Ec-00_002520	Hypothetical protein	Unknown	OG0019436		6.75218	7.02497	3.45454	4.13922	5.14003	5.11678	5.23511	3.35014	4.81692	5.1363	4.56798	2.98002	3.03065	4.14826	2.99857	1.08252	2.27029	3.36299	3.6127	3.51868	4.30804	3.25187	3.83811	0	0	0	0	0	0	0	0	3.98204	3.99358	4.69638	4.03549	4.66679	3.20345	0	0	0	0	lightgreen	-0.509759	-0.405203	-0.337881
Ec-00_002530	RNA polymerase Rpb2, domain 2	Transcription	OG0019437		4.79178	5.77737	6.89639	6.81503	6.69746	6.1857	6.47883	6.97525	5.69973	5.51364	6.42321	7.26424	7.18928	7.33934	7.51932	5.36592	7.2055	6.25997	5.86821	6.23225	6.5847	7.25783	7.56319	5.52002	5.89318	6.83297	7.07602	6.07892	5.37065	7.11798	7.23517	6.89501	6.43528	7.30089	7.25839	6.53142	6.82305	6.84499	6.80022	6.94228	6.34394	cyan	0.234438	-0.106928	0.113671
Ec-00_002540	WSC domain containing protein	Cell wall and extracellular	OG0019438		6.97266	3.55699	3.78756	2.79411	4.64289	1.30166	2.31141	3.52499	6.03491	6.45518	5.58354	9.66076	9.979	9.22151	8.43161	2.71999	2.27029	5.2538	4.55249	5.05894	6.10245	3.45247	3.83811	7.33455	7.50943	3.98948	3.34497	7.56563	7.66441	4.70034	2.77851	8.33737	11.0712	4.85695	10.6301	5.4496	0	9.79219	9.52053	6.84792	7.56401	turquoise	0.483173	0.298657	0.664937
Ec-00_002550	conserved unknown protein	Unknown	OG0019439		0	0	14.1328	15.2316	15.4207	16.5438	15.6188	14.3952	1.4325	1.85938	0	1.87949	1.09247	4.77044	2.87306	4.9625	5.76921	7.19934	7.16273	6.28599	7.16936	0	0	1.21426	1.20982	0	0	0	0.752151	0	0	0	0.489014	1.33694	0	2.34107	4.42821	3.6318	2.40305	4.75238	5.32504	lightcyan	-0.701409	-0.426959	-0.45159
Ec-00_002560	hypothetical protein	Unknown	OG0019440		0	0	0	0	0	0	0	0	0	0	0	0	0	0	0	0	0	0	1.16871	0.964221	0	0	0	0	0	0	0	0	0	0	0	0	0	0	0	0	0	0	0	0	0	NA	NA	NA	NA
Ec-00_002570	2Fe-2S ferredoxin-type domain	Metabolism	OG0019441		0	0	1.27694	0	0	1.30166	0.993432	0	0	0	0	0.820122	1.09247	0	0.736313	0	0	0	0	0.964221	0	0	0	0	0.728178	0	0	0.812953	0.752151	0	0	0.848085	0.489014	0	0.808298	0	0	0	0	0	0	NA	NA	NA	NA
Ec-00_002580	Hypothetical protein	Unknown	OG0019442		0	0	0	0	0	0	0	0	0	0	0	0.467569	0	0	0	0	0	0	0	0	0	0	0	0	0	0	0	0.812953	0	0.502471	0	0	0	0	0	0	0	0	0	0	0	NA	NA	NA	NA
Ec-00_002590	hypothetical protein	Unknown	OG0019443		0	0	1.27694	1.12909	0	1.30166	1.5762	1.85911	2.96284	2.92054	3.33452	2.02227	1.52973	0.845388	1.99878	0	1.1857	1.21845	0	0	0	0	1.53617	3.35635	1.57029	0	0	2.96555	3.65914	0	0	3.1701	2.21144	2.01874	1.85957	0	0	0	1.05124	0	0	NA	NA	NA	NA
Ec-00_002600	Ion transport domain	Membrane function and transporters	OG0019444		0	0	0	0	0	0	0	0	0	0	0	0	0	0	0	0	1.1857	0	0	0	0	0	0	0	0	0	0	0	0.752151	0	0	0	0	0	0	0	0	0	0	0	0	NA	NA	NA	NA
Ec-00_002610	Hypothetical protein	Unknown	OG0019445		8.96402	8.89136	7.94967	8.47082	8.28109	7.4661	7.78131	7.75811	6.68578	6.14273	7.22334	6.69998	6.51713	7.53796	6.73083	6.55109	6.9469	6.7074	6.60146	5.83566	6.6127	6.05238	7.08658	8.43561	8.38597	5.94574	4.85396	8.3902	8.49563	5.42896	5.09654	6.22901	6.05234	6.61713	5.64961	7.99533	7.19053	6.73904	6.49187	6.60031	5.76783	blue	-0.586463	-0.108984	-0.0932241
Ec-00_002620	expressed unknown protein	Unknown	OG0019446		6.17389	6.76415	0	4.03859	3.25783	1.30166	0.993432	2.30503	0	0	0	4.35907	3.21788	0.845388	1.73582	0	0	1.21845	0	6.4519	6.19795	2.39589	2.74432	5.29595	5.61258	3.37452	4.56586	7.47648	6.44662	5.67233	5.11293	8.90167	6.91207	6.44249	8.22861	11.2819	8.93946	4.36008	6.02986	5.36553	6.18985	salmon	0.351813	0.860087	0.713985
Ec-00_002630	conserved unknown protein	Unknown	OG0019447		8.15883	8.29148	7.74475	8.28563	8.02057	8.20697	7.79425	7.77552	7.31307	7.38021	7.23789	7.30322	7.28317	7.1899	7.44408	6.6667	6.68621	6.76134	7.05852	6.51327	6.86631	7.31044	7.18406	6.66301	6.99677	6.21561	6.20656	6.97582	6.86601	6.45386	6.832	6.70341	6.41495	7.09083	7.00359	6.79185	6.27876	6.42048	7.28987	6.81504	8.10121	brown	-0.720903	-0.426745	-0.224142
Ec-00_002640	Bicarbonate transporter, eukaryotic	Membrane function and transporters	OG0019448		3.3074	3.55699	6.78908	6.98691	6.49314	6.03267	6.84493	7.1589	5.99703	5.1363	5.33556	7.75314	6.59806	6.4569	7.55552	4.90983	7.83228	5.09483	6.01465	5.83566	6.25236	7.10241	7.06627	5.96324	6.58795	7.05256	6.97458	6.60161	6.41226	6.94339	6.72948	5.72811	5.7402	7.61726	6.60766	5.85636	9.71886	7.17257	6.18675	7.16734	5.92263	blue	0.209038	0.00530265	0.0117072
Ec-00_002650	Harbinger transposase-derived nuclease domain	Transposon or viral gene	OG0000042		0	0	0	0	2.14606	0	2.79608	1.85911	2.6082	2.30532	2.0105	2.98002	3.15813	2.53119	2.11422	0	0	2.3164	1.80579	2.52483	2.25147	3.01882	2.74432	0.731276	1.20982	1.07211	0.904947	0.812953	1.24404	0	0	3.0358	2.54642	3.19211	1.85957	1.60093	0	0	0	0	0	NA	NA	NA	NA
Ec-00_002660	Hypothetical protein	Unknown	OG0019449		0	0	4.17624	3.93041	2.97312	3.66915	1.99014	2.30503	0	0	0	0	0.462012	0	0	0	0	0	0	0	0	0	0	0	0	0	0	0	0	0	0	0.848085	0	0	0.808298	1.60093	0	0	0	0	0	NA	NA	NA	NA
Ec-00_002670	tRNA(Ile)-lysidine/2-thiocytidine synthase	Protein synthesis	OG0019450		0	0	0	0	1.43994	0	0	0	0	0	0	0	0	0	0	0	0	0	0	0	0	0	0	0	1.20982	0	0	0	0	0	0	0	0	0	0.460032	0	0	0	0	0	0	NA	NA	NA	NA
Ec-00_002680	expressed unknown protein	Unknown	OG0000519		0	0	0	1.12909	0	0	0	0	0	0	0	0	0	0	0	0	0	0	0	0	0	0	0	1.21426	0.728178	0	0.522295	0.812953	0	0	0	0.485483	0	0	0	0	1.24404	0	0	0	0	NA	NA	NA	NA
Ec-00_002690	Adenylyl cyclase class-3/4/guanylyl cyclase	Cellular regulation and signalling	OG0000387		0	0	0	0	0	0	0	0	0	0	0	4.89279	0	0	0	0	0	0	0	0	0	0	1.53617	0.731276	0	0	0	0	0.752151	0	0	0	0.489014	0	0	0	0	0	0	0	0	NA	NA	NA	NA
Ec-00_002700	conserved unknown protein	Unknown	OG0002607		7.16386	7.34468	7.19152	7.02687	6.8337	7.2047	7.70114	7.22375	7.38816	6.89825	8.11984	8.21191	7.50324	8.55867	9.06356	7.31939	8.96779	7.79833	7.36196	7.25891	7.06177	8.5714	8.1791	7.65587	7.29699	8.0561	8.38494	6.91379	7.58436	8.24743	8.23786	8.12639	7.86671	8.94821	8.42741	6.96621	9.49909	7.94736	6.22861	8.24486	7.54824	royalblue	0.420855	0.00518152	0.0822726
Ec-00_002710	hypothetical protein	Unknown	OG0019451		9.36541	8.71772	10.5172	9.4856	10.9745	9.72516	9.98544	9.83218	8.84477	8.0072	8.21851	5.13205	5.2476	3.5056	4.41348	7.75225	6.75593	7.22516	7.57525	6.25039	6.42018	4.87873	4.17809	6.66301	5.38218	5.38517	4.69296	6.7611	6.11749	5.08383	5.37987	4.93565	4.80908	4.90673	4.25001	7.67482	6.89117	5.26469	5.22722	6.01313	6.28807	brown	-0.877226	-0.358643	-0.591538
Ec-00_002720	Kinesin light chain	Cytoskeleton and flagella	OG0019452		3.3074	5.462	1.27694	1.75464	1.43994	2.77832	1.5762	0	2.13694	2.92054	4.14247	3.11363	2.73594	3.28751	4.14142	0	1.1857	0	0	0	0	1.94186	0	1.86411	1.85845	0	0	2.65481	2.97141	0	0	2.8877	2.81809	3.27025	2.46123	0	0	0	0	0	1.6122	NA	NA	NA	NA
Ec-00_002730	hypothetical protein	Unknown	OG0019453		0	0	1.94355	1.12909	0	2.43173	1.99014	1.85911	2.13694	3.82197	3.53633	2.27136	2.13657	0.845388	1.87328	0	0	1.86945	0	0	0	0	2.26318	2.10452	0	0	0	1.32976	1.24404	0	0	2.80752	2.64277	2.47986	1.525	0	0	0	0	0	0	NA	NA	NA	NA
Ec-00_002740	expressed unknown protein	Unknown	OG0019454		0	0	2.39774	2.18955	1.43994	0	1.5762	1.21034	3.86722	1.85938	2.0105	0	0.462012	0.845388	0	1.08252	0	1.21845	0	0	0	0	1.53617	2.10452	2.6444	0	0	1.70947	1.61018	0	0	0.848085	0	0.59332	0.460032	0	0	0	0	0	1.02048	NA	NA	NA	NA
Ec-00_002750	expressed unknown protein	Unknown	OG0019455		0	0	0	0	1.43994	0	0	0	0	0	0	0	0	0	0	0	0	0	0	0	0	0	0	0	0	0	0	0	0	0	0	0	0	0.59332	0	0	0	0	0	0	0	NA	NA	NA	NA
Ec-00_002760	copper/zinc superoxide dismutase	Metabolism	OG0019456		6.49182	6.44554	9.442	10.3308	9.89186	9.75238	10.3133	10.3651	8.21262	8.77259	9.31546	9.51892	9.63171	9.70045	9.31352	9.30497	8.82506	8.66906	8.63172	8.23155	8.38737	9.59359	9.61102	9.51127	9.87832	9.73866	9.49867	9.91124	9.54475	9.24901	9.2977	9.26839	9.15256	9.48022	9.52134	8.46261	8.45681	8.28516	8.46674	8.94869	8.56412	magenta	-0.0733928	-0.228454	-0.142619
Ec-00_002770	P-type ATPase (PMID 12707717)	Membrane function and transporters	OG0019457		6.86662	7.34468	6.0234	5.24045	5.20847	5.28885	4.94146	5.90993	6.03491	6.59903	6.59126	6.62923	6.54656	6.71937	6.39071	6.34832	7.2545	7.10515	6.8084	6.43614	6.54166	6.56661	6.69506	5.67717	5.79424	5.47732	5.80648	5.19258	5.46307	5.95022	6.12462	5.94036	6.24884	6.54822	6.97803	6.21338	6.22698	6.27642	6.14363	6.09757	5.16881	grey	0.260666	-0.225536	-0.0269574
Ec-00_002780	hypothetical protein	Unknown	OG0000546		0	0	0	0	0	0	2.574	0	0	0	0	0	0	0	0	0	0	0	0	0.964221	0	0	0	1.21426	0	0	0	0.812953	0.752151	0	0	0	0.489014	1.01252	0	0	0	0	0	1.20016	0	NA	NA	NA	NA
Ec-00_002790	hypothetical protein	Unknown	OG0019458		0	0	0	0	0	0	0	0	0	1.85938	0	0.467569	1.86482	0	1.41402	0	0	0	0	0	0	0	0	1.86411	1.57029	0	0	0.812953	1.90196	0	0	0.485483	1.77438	1.01252	1.08863	0	0	0	0	0	0	NA	NA	NA	NA
Ec-00_002800	hypothetical protein	Unknown	OG0008747		0	3.55699	5.74578	5.66854	5.66333	5.11678	5.47898	5.38307	6.50866	6.83322	6.74177	4.9653	4.83566	4.68365	4.99842	4.85516	6.01651	6.07357	5.31075	5.85949	5.91281	5.19082	4.57306	5.22133	4.96353	5.79633	6.14564	5.27948	5.32212	6.44008	6.50581	5.30032	4.88984	4.85695	5.18205	6.04589	7.21732	6.92448	7.08863	6.32476	7.61789	blue	0.279709	0.0752811	-0.166679
Ec-00_002810	hypothetical protein	Unknown	OG0019459		0	0	0	0	0	0	0.993432	0	0	0	0	0	0	0	0	0	0	0	0	0	0	0	0	0	0	0	0	0	0	0	0	0	0	0	0	0	0	0	0	1.20016	0	NA	NA	NA	NA
Ec-00_002820	Cystathionine beta-lyase,	Metabolism	OG0019460		3.3074	0	5.40171	5.70183	4.73857	5.11678	5.37947	5.81211	2.13694	3.15146	3.871	3.04837	3.15813	3.60341	1.58388	1.08252	1.8276	1.21845	3.08553	1.53706	1.52649	3.45247	2.26318	3.35635	3.52416	2.10685	1.45678	3.43809	3.73525	2.58488	1.35786	2.72263	2.44317	2.34191	2.13098	1.60093	1.90196	0	0	1.20016	0	brown	-0.654248	-0.413978	-0.39036
Ec-00_002830	Armadillo-like helical	Cellular regulation and signalling	OG0019461		0	0	0	0	0	0	0.993432	0	0	0	0	0	0	0	0	0	0	0	0	0	0	0	0	0	0	0	0	0	0	0	0	0	0.489014	0	0	0	0	0	0	0	0	NA	NA	NA	NA
Ec-00_002840	conserved unknown protein	Unknown	OG0000431		0	0	1.27694	0	0	3.49261	1.5762	0	0	1.21055	1.33033	0.467569	0.811408	1.3749	0	2.45179	0	1.21845	2.58314	1.53706	0.95637	0	0	1.21426	0	0.633432	0	0	1.24404	0	0.475874	1.76567	0.853573	0.59332	0	0	1.90196	0	0	0	1.02048	NA	NA	NA	NA
Ec-00_002850	n/a	Unknown	OG0019462		0	0	0	4.03859	2.14606	1.97463	0.993432	0	0	0	0	0.467569	0.811408	0	1.22146	1.08252	2.60856	1.86945	1.16871	3.83937	4.23787	1.94186	0	3.04635	1.85845	0	1.20709	3.22108	4.00492	0.502471	0.475874	4.1212	4.09925	2.92852	4.43673	4.77789	4.33345	2.5568	3.67755	3.50859	2.03061	NA	NA	NA	NA
Ec-00_002860	Hypothetical protein	Unknown	NA		0	0	0	0	0	1.30166	0	0	0	0	1.33033	0	0.462012	0	0	0	0	0	0	0	0	0	0	0.731276	1.20982	0	0	0.812953	0	0	0	1.13761	0	0	1.32325	0	0	0	0	0	0	NA	NA	NA	NA
Ec-00_002870	expressed unknown protein	Unknown	OG0019463		0	0	0	0	0	0	0.993432	0	0	0	0	0	0	0	0	0	0	0	0	0	0	0	0	0	0	0	0	0	0	0	0	0	0	0	0	0	0	0	0	0	0	NA	NA	NA	NA
Ec-00_002880	Hypothetical protein	Unknown	OG0019464		3.3074	3.55699	4.73436	4.23329	4.99257	4.69528	4.57235	4.06756	4.72722	4.69882	4.26118	3.95843	3.82895	4.49263	4.41348	4.85516	5.29433	4.47453	4.55249	3.63368	4.08637	3.25187	4.45303	3.04635	3.94898	4.13237	3.81631	4.20214	3.80753	3.34569	3.48024	3.35068	4.06488	4.41607	3.7435	4.97732	4.8264	3.96828	3.67755	4.26057	3.49645	NA	NA	NA	NA
Ec-00_002890	hypothetical protein	Unknown	OG0019465		0	0	0	0	0	0	0	0	0	0	0	0	0	0	0	0	0	0	0	0	0	0	0	0	0	0	0	0	0	0	0	0	0	0	0	0	0	0	0	0	0	NA	NA	NA	NA
Ec-00_002900	expressed unknown protein	Unknown	OG0019466		0	0	0	1.12909	2.97312	1.97463	1.99014	1.85911	2.96284	2.92054	1.33033	3.45315	3.21788	3.28751	2.93718	2.71999	1.1857	0	1.80579	0	0	0	0	2.65096	3.52416	0.633432	0	3.53546	2.69475	0	0	2.32209	1.14434	2.72156	2.88455	0	1.90196	0	1.65288	0	0	NA	NA	NA	NA
Ec-00_002910	hypothetical protein	Unknown	OG0019467		0	8.34024	0	2.18955	1.43994	1.30166	1.99014	1.21034	1.4325	1.21055	2.47088	1.54294	1.3276	1.76139	1.58388	0	0	0	0	0.964221	0	1.94186	0	3.26023	1.20982	0	0	1.70947	0.752151	0	0.475874	1.92615	1.59332	1.33694	1.70196	0	1.24404	0	0	1.20016	1.02048	yellow	-0.245787	0.0137906	0.126237
Ec-00_002920	EsV-1-199	Membrane function and transporters	OG0019468		0	0	0	0	0	0	0.993432	1.21034	0	0	0	0	0	0	0	0	0	0	0	0	0	0	0	0	0	0	0	0	0	0	0	0	0	0	0	0	0	0	0	0	0	NA	NA	NA	NA
Ec-00_002930	hypothetical protein	Unknown	OG0019469		0	0	1.27694	0	0	0	1.5762	0	0	0	0	0	0	0.845388	0.736313	0	1.8276	0	0	0	0	0	0	0	0	0	0.522295	0	0	0	0	0.485483	0	0	0	0	0	0	0	1.20016	1.02048	NA	NA	NA	NA
Ec-00_002940	AMP-dependent synthetase/ligase	Metabolism	OG0019470		6.75218	7.02497	7.23306	6.26644	6.57319	6.54386	7.42154	7.3453	6.14292	7.03465	7.51375	8.6639	8.69066	8.87004	8.71605	6.61828	8.4576	8.14117	7.97653	8.3456	8.08662	8.4418	8.44602	5.69567	4.22703	7.45735	8.83426	5.06792	5.24612	8.35231	8.6253	8.8588	8.82177	8.49653	8.50403	5.06756	7.9504	8.44197	7.76557	8.18178	6.97108	blue	0.350639	-0.149192	0.0946011
Ec-00_002950	General substrate transporter	Membrane function and transporters	OG0019471		0	0	1.27694	1.12909	1.43994	1.97463	1.5762	1.85911	0	0	0	0.467569	0.811408	0.845388	0.736313	0	0	1.21845	0	0	0	0	1.53617	2.79514	1.85845	0.633432	0	1.32976	2.35214	0	0	0.848085	0.853573	0	0	0	0	0	0	0	0	NA	NA	NA	NA
Ec-00_002960	Hypothetical protein	Unknown	OG0019472		7.25074	7.1396	4.65508	5.37034	5.80268	4.52212	4.30942	4.54453	3.68863	2.92054	3.33452	1.87949	0.811408	1.3749	0.736313	1.08252	1.8276	1.86945	1.16871	0.964221	0.95637	0	2.74432	3.26023	3.34931	0	0	3.87012	3.5788	0	0	1.58509	0.853573	1.01252	1.70196	2.34107	1.24404	1.39397	0	0	1.02048	brown	-0.815686	-0.228195	-0.290623
Ec-00_002970	expressed unknown protein	Unknown	OG0000141		0	0	1.27694	1.12909	0	0	0	0	0	0	0	0.467569	0	0	0	0	0	0	0	0	0	0	0	0.731276	0	0	0	0	0.752151	0	0	0	0	0	0	0	0	0	0	0	0	NA	NA	NA	NA
Ec-00_002990	18S rRNA	Protein synthesis	NA		9.69467	9.53936	17.5653	16.964	18.1328	16.5106	17.5524	17.7256	7.87947	11.0424	10.5857	7.59647	8.37519	9.02149	9.40351	4.67752	5.95855	9.12838	7.41568	6.66969	8.52264	9.90929	9.53915	10.4746	11.627	1.40803	0	10.1973	12.7119	0	0	6.20574	6.06978	8.34678	7.46877	4.27056	5.48527	4.24093	2.40305	4.52733	5.08385	lightcyan	-0.766053	-0.486082	-0.390468
Ec-00_003000	expressed unknown protein	Unknown	OG0019473		0	0	2.39774	2.79411	2.61807	1.97463	1.5762	2.30503	2.13694	1.21055	0	0	0	0.845388	0.41463	0	0	0	0	0	0	0	0	2.10452	2.09853	0	0	1.70947	1.24404	0	0	0.485483	0.853573	0.59332	0.460032	0	0	0	0	0	0	NA	NA	NA	NA
Ec-00_003010	hypothetical protein	Unknown	OG0019474		7.55378	3.55699	2.74265	2.18955	2.61807	1.97463	2.98849	1.21034	2.96284	1.21055	2.81935	5.37762	3.27525	2.71748	2.50116	0	0	1.21845	0	1.53706	0.95637	3.01882	4.3221	3.82804	3.03949	1.07211	1.85496	3.87012	4.12294	2.7725	2.69391	3.51114	3.75575	2.72156	2.72979	1.60093	1.24404	3.96828	3.55128	2.90463	3.73802	turquoise	-0.00173823	0.229728	0.467531
Ec-00_003030	hypothetical protein	Unknown	OG0019475		0	0	4.17624	4.76121	4.8283	4.32529	3.31008	3.52499	1.4325	1.21055	2.0105	2.7531	3.03065	2.06591	2.41371	0	0	1.21845	0	0	0	0	0	1.21426	0.728178	0	0.904947	1.70947	0.752151	0	0	2.07054	2.81809	2.01874	1.32325	1.60093	0	1.39397	0	4.26057	0	NA	NA	NA	NA
Ec-00_003040	hypothetical protein	Unknown	OG0019476		0	0	1.27694	1.12909	0	0	0.993432	1.21034	0	0	0	0	0	0	0	0	0	0	0	0	0	0	0	0	3.75215	0	0	0	0	0	0	0	0	0	0	0	0	0	0	0	0	NA	NA	NA	NA
Ec-00_003050	expressed unknown protein	Unknown	OG0019477		0	0	0	1.12909	0	1.97463	3.15823	0	0	0	0	0	0	0	0	0	0	0	1.16871	0	0	0	0	0	0	0	0	0	0	0	0	0	0	0	0	0	0	0	0	1.20016	0	NA	NA	NA	NA
Ec-00_003060	Ion transport domain	Membrane function and transporters	OG0019478		0	0	0	1.12909	2.14606	0	0	1.21034	0	0	0	2.38144	1.52973	1.3749	1.99878	0	0	0	0	0	0	0	0	1.21426	0.728178	0	0.522295	0.812953	1.61018	0	0	1.37863	1.77438	1.01252	1.32325	0	0	0	0	0	0	NA	NA	NA	NA
Ec-00_003070	expressed unknown protein	Unknown	OG0019479		0	0	4.80951	4.23329	4.31063	4.42706	3.15823	3.35014	0	0	0	0	0	0	0	3.95704	1.8276	3.538	3.8806	2.74547	3.3791	0	0	0	0	0	0	0	0	0	0	0	0	0	0	3.7225	1.90196	0	1.65288	2.29071	2.84228	NA	NA	NA	NA
Ec-00_003080	hypothetical protein	Unknown	OG0000248		0	0	0	1.12909	0	0	0.993432	0	0	0	0	0	0	0	0	1.08252	0	0	0	0	0	0	0	0	0	0	0	0.812953	0	0	0	0	0	0	0	0	0	0	0	0	0	NA	NA	NA	NA
Ec-00_003090	Hypothetical protein	Unknown	OG0019480		0	0	1.27694	1.12909	1.43994	0	0.993432	0	0	0	0	0	0	0	0	1.08252	1.8276	2.93259	2.58314	3.51868	3.50394	0	0	0	0	0	0.522295	0	0	0	0	0	0.853573	2.01874	0	4.27056	3.73524	0	2.8941	2.63008	2.35455	NA	NA	NA	NA
Ec-00_003110	18S rRNA	Protein synthesis	NA		12.7852	13.0837	19.0377	18.7905	19.6757	18.2196	19.1941	19.2976	11.3587	13.0247	13.3103	13.6106	13.0216	14.7003	14.7784	12.3065	12.7803	14.7955	14.0547	13.4435	13.7735	13.0052	13.1214	13.3968	14.297	10.462	10.0766	13.9543	14.6378	9.16145	9.61343	11.4424	11.6765	13.0398	12.5326	10.4343	12.2421	10.747	9.86215	11.2165	10.5445	lightcyan	-0.771912	-0.519532	-0.417262
Ec-00_003120	hypothetical protein	Unknown	OG0019481		0	0	6.17318	5.59957	6.04652	5.53665	5.94124	5.81211	5.91815	6.8165	6.20362	3.04837	2.13657	2.71748	3.50101	5.9908	5.76921	5.92394	5.89872	5.25132	5.08384	3.78545	2.26318	3.44647	3.82078	3.65263	3.28166	3.71247	4.28364	2.93851	3.75535	2.8877	3.1154	4.02338	2.88455	5.51521	5.80075	4.36008	4.62004	4.60631	4.49828	yellow	-0.225194	-0.33191	-0.616068
Ec-00_003130	hypothetical protein	Unknown	OG0000029		6.97266	6.61362	0	2.18955	3.25783	1.30166	0.993432	2.64517	0	0	0	0.820122	0	0	0	1.08252	0	0	0	0	0	0	0	1.57547	0.728178	0	0	2.00978	0.752151	0	0	0	0	1.01252	1.08863	0	0	0	0	0	0	blue	-0.576053	0.0323566	0.0586542
Ec-00_003140	hypothetical protein	Unknown	OG0019482		3.3074	5.05783	5.01398	5.14686	4.43009	4.6113	4.15749	2.92022	2.13694	1.85938	0	3.80884	3.48433	1.76139	1.99878	0	0	1.21845	0	0	0	0	1.53617	4.07404	4.9015	1.07211	0	5.38776	4.60088	0	0.475874	1.13761	1.59332	2.18935	0.460032	0	0	0	0	0	0	NA	NA	NA	NA
Ec-00_003150	hypothetical protein	Unknown	OG0019483		0	0	3.92908	3.02206	2.14606	2.77832	2.31141	1.85911	2.96284	1.21055	3.33452	0	0	0.845388	0.41463	0	0	0	0	0	0	0	0	0	0	0	0	1.32976	0.752151	0	0	0	0	0	0	0	0	0	0	0	0	NA	NA	NA	NA
Ec-00_003160	DNA-directed RNA polymerase, subunit 2	Transcription	OG0019484		4.79178	5.05783	6.22899	6.41434	5.80268	5.74805	5.96432	6.34251	3.48477	4.96477	5.67192	6.69998	6.66398	6.89383	7.17829	5.01331	6.88601	5.92394	5.26466	5.81143	5.89011	6.56661	6.61342	4.84421	4.9015	6.81895	7.549	5.00131	4.68004	7.67468	7.86246	6.40959	6.15394	6.54036	6.53356	4.27056	6.80551	6.71688	6.63883	6.71167	5.36159	cyan	0.231831	0.0078066	0.154696
Ec-00_003170	hypothetical protein	Unknown	OG0000033		0	0	5.19303	5.56381	5.61372	5.53665	5.65952	5.28924	2.96284	2.92054	4.89615	3.55063	4.19875	2.88244	2.87306	3.60613	5.29433	2.93259	3.45744	2.52483	2.73173	4.05581	3.63244	3.53128	2.48435	3.93852	3.57361	4.01222	2.97141	3.15642	3.83652	2.07054	1.59332	2.01874	0	0	1.90196	2.9092	2.07619	1.20016	1.02048	magenta	-0.462271	-0.602834	-0.588124
Ec-00_003180	Metallo-dependent phosphatase-like	Cellular regulation and signalling	OG0019485		0	0	0	0	0	1.30166	0.993432	0	0	0	0	0.820122	0	1.3749	0	0	0	0	0	0.964221	0	0	0	0.731276	0	0	0	0	0	0	0	0.485483	0.489014	0	0	0	0	0	0	0	0	NA	NA	NA	NA
Ec-00_003190	Peptidase C48, SUMO/Sentrin/Ubl1	Proteolysis	OG0019486		0	0	0	0	0	0	0	0	0	0	0	0	0	0	0	0	0	0	0	0	0	0	0	0	0	0	0	0	0	0	0	0	0	0	0	0	0	0	0	0	0	NA	NA	NA	NA
Ec-00_003200	expressed unknown protein	Unknown	OG0019487		0	0	1.27694	0	1.43994	0	0.993432	1.21034	0	0	2.0105	0	0	0	0.41463	0	0	0	0	0	0	0	0	1.21426	1.57029	0	0	0	0	0	0	0	0	0	0	0	0	0	0	0	0	NA	NA	NA	NA
Ec-00_003210	DNA polymerase epsilon catalytic subunit	DNA or chromatin modification	OG0019488		0	0	0	0	0	0	0	0	1.4325	1.21055	3.33452	0	0.462012	0	0.41463	0	0	0	0	0	0	0	0	0	0.728178	0	0.522295	0	0	0.502471	0	0.485483	0.853573	1.01252	0.460032	0	0	0	0	0	0	NA	NA	NA	NA
Ec-00_003220	hypothetical protein	Unknown	OG0000409		0	0	0	0	0	0	0	0	1.4325	1.85938	0	0	0	0	0.41463	0	0	0	0	0	0	0	0	0	0	0	0	0.812953	0	0	0	0.485483	0	0	0	0	0	0	0	0	0	NA	NA	NA	NA
Ec-00_003230	Hypothetical protein	Unknown	OG0019489		0	0	0	0	0	0	0	0	0	0	0	0	0	0	0	0	0	0	0	0	0	0	0	0	0	0	0	0	0	0	0	0	0	0	0	0	0	0	0	0	0	NA	NA	NA	NA
Ec-00_003240	expressed unknown protein	Unknown	OG0019490		0	0	1.27694	0	0	0	0	0	0	0	0	0	0	0	0	0	0	0	0	0	0	0	0	0	0.728178	0	0	0	0	0	0	0	0	0	0	0	0	0	0	0	0	NA	NA	NA	NA
Ec-00_003250	Hypothetical protein	Unknown	OG0000430		5.50776	6.25526	7.4125	7.42591	7.56559	5.86146	7.09546	6.92933	5.12858	3.68126	4.14247	6.98357	6.52306	7.0054	6.63259	6.11232	6.34533	6.20912	6.40298	6.07833	6.21632	1.27561	3.39248	5.38979	5.86095	0.633432	1.20709	4.56707	4.12294	0.502471	0.475874	5.49205	5.66188	6.02454	5.45336	5.38086	5.999	5.73053	6.42143	7.31573	6.8983	black	-0.299762	-0.213702	0.0538867
Ec-00_003260	expressed unknown protein	Unknown	OG0009234		5.19374	5.05783	8.52434	8.75077	8.61318	7.69755	7.76168	8.27506	9.45686	9.48108	9.98407	6.83671	5.75073	5.98063	6.8143	9.60331	9.56399	9.18868	8.93003	8.32436	8.3421	8.12679	7.66125	7.93416	7.54029	8.17919	7.86197	8.09513	8.13029	8.17857	8.39516	6.0047	6.34507	6.82561	6.55677	9.88028	9.37968	8.93487	8.92068	8.82617	9.69883	yellow	-0.000274269	-0.153876	-0.517207
Ec-00_003265	Cytochrome b5-like heme/steroid binding domain	Respiration	OG0019491		9.26464	9.4083	9.07792	8.98513	8.91402	8.68382	8.4215	8.34085	8.60142	8.42083	8.07192	8.63641	8.19366	8.22776	8.37631	8.50441	8.02816	7.61518	7.76103	8.55343	8.50407	8.76761	8.66445	9.31443	9.3421	8.70076	8.80078	9.69381	9.46038	8.58924	8.42171	8.72744	8.89819	8.98922	9.03079	9.11924	8.75525	8.3869	8.28526	8.36329	7.80867	grey	-0.221123	0.446496	0.308443
Ec-00_003270	Cytochrome b5-like heme/steroid binding domain	Respiration	OG0009233		12.95	12.9951	9.73489	9.4246	9.24658	9.69488	9.05295	8.67355	9.84852	9.57356	8.39115	8.3537	8.32852	8.11205	7.91724	8.33498	8.5586	8.16804	8.35757	8.69919	8.59108	8.566	8.60936	8.78559	8.5642	8.50232	8.31354	8.88645	8.77567	8.42582	8.3647	8.50561	8.69829	8.34452	8.52625	9.22597	9.57613	8.71776	8.35306	8.66947	8.51223	red	-0.564239	0.0370982	-0.0775323
Ec-00_003280	EF-hand domain pair	Cellular regulation and signalling	OG0007258		12.3537	12.2747	10.6121	9.88573	10.2974	9.88123	9.66104	9.61005	10.7155	10.5751	9.61481	8.52389	8.58401	8.71455	8.63862	9.69176	9.36919	9.97752	10.0094	9.833	9.54993	8.72948	8.40617	9.03107	8.88387	8.2171	8.06597	8.72036	9.19326	8.13219	8.08431	9.10401	9.59633	8.60418	9.57063	9.50161	9.77853	9.23298	9.95703	9.35539	9.96989	red	-0.56409	-0.14216	-0.247232
Ec-00_003285	lncRNA	Unknown	NA		7.68436	7.02497	12.9004	12.3376	12.3223	12.5221	11.76	12.0354	5.49754	6.14273	4.14247	3.04837	3.03065	3.93936	3.58347	11.4847	10.8418	11.9626	11.8942	11.2245	11.3866	3.62854	3.1045	4.23442	5.08012	2.43563	0.522295	4.42181	3.73525	1.16987	0.475874	3.45961	3.83946	2.92852	3.96784	12.8848	11.4384	11.1996	11.7011	11.1669	10.8448	black	-0.443664	-0.208153	-0.341145
Ec-00_003290	Sphingomyelin synthase-like domain	Metabolism	OG0019492		12.9254	12.726	10.0613	9.41209	9.9202	9.75727	9.37487	9.02237	9.56114	9.4731	10.1814	8.20631	8.41402	7.92607	7.89924	8.86412	8.58757	9.56738	9.47658	9.48222	9.2822	8.5981	8.07111	8.24474	7.38462	8.32767	8.95076	7.69771	7.92219	8.53356	8.42991	9.17263	9.08663	8.49857	8.76416	8.2859	9.21336	9.00512	9.2452	9.04398	8.9654	red	-0.557101	-0.1124	-0.225425
Ec-00_003300	hypothetical protein	Unknown	OG0019493		8.68085	9.53936	7.98251	7.2458	7.10902	7.40506	6.17684	7.46814	7.02387	7.56178	7.06916	9.10203	8.86195	8.09533	7.55041	6.6981	6.38987	6.07357	6.40298	8.43553	8.19244	5.78131	6.11704	9.34404	9.01231	6.54859	6.27317	8.82277	8.84172	7.1309	7.08132	8.29941	8.67569	8.30097	7.85081	7.98379	5.8699	8.04841	8.20365	8.0678	8.26935	turquoise	0.105278	0.467022	0.737906
Ec-00_003310	Hypothetical protein	Unknown	OG0019494		4.79178	6.03601	1.27694	2.52327	3.25783	2.43173	0.993432	1.21034	0	0	1.33033	6.36017	6.39303	4.7277	5.28381	1.08252	3.3108	1.21845	2.58314	6.78615	6.30478	1.27561	2.74432	5.49912	5.44875	3.83087	4.23923	5.36144	5.63185	3.88255	3.87545	6.1979	6.96428	5.57899	5.73348	5.57797	1.90196	4.47015	4.74067	5.53661	5.08385	turquoise	0.477188	0.668603	0.931357
Ec-00_003320	conserved unknown protein	Unknown	OG0009232		8.9895	8.95536	5.74578	6.5114	6.69746	6.09584	7.30885	5.97165	6.03491	6.67522	5.97954	6.71583	6.90569	6.8041	6.99462	8.34493	7.73204	7.70966	7.12453	8.34138	7.88329	6.08294	5.9934	7.59314	7.02613	7.31976	7.25972	6.8299	7.83408	7.2737	7.33979	7.14384	7.42692	7.3911	6.80954	7.4416	6.53444	7.64108	7.60002	8.85071	9.25977	turquoise	0.27825	0.467623	0.505427
Ec-00_003330	Similar to Iron-containing Alcohol Dehydrogenase	Metabolism	OG0009231		6.34159	7.1396	8.98372	9.23865	9.1585	8.54924	9.12385	9.5277	7.72584	7.62077	8.57428	7.51427	7.25493	7.87801	7.99084	7.57754	8.19434	7.72783	8.0733	7.59323	7.99918	8.10462	7.89803	8.94673	8.00223	8.85127	9.22661	8.56182	9.14525	8.60785	8.88343	7.41467	7.31073	7.08544	7.21164	7.88797	7.24361	8.00336	8.40875	8.01087	8.50816	yellow	-0.331983	-0.0936204	-0.286304
Ec-00_003340	Transthyretin/hydroxyisourate hydrolase, superfamily	Metabolism	OG0007260		7.25074	7.24578	10.0785	9.29154	10.0749	10.0281	9.98403	9.70395	7.15004	7.02012	5.58354	7.14054	7.8415	8.04834	7.70113	6.95363	6.09932	7.99124	7.91817	7.78583	7.80658	7.42224	7.45797	7.28045	7.88692	7.74742	7.4517	7.89409	7.14243	7.16061	7.35709	7.89137	7.4504	7.63951	7.32073	8.09526	6.17327	5.93631	6.45708	6.34793	5.08385	lightcyan	-0.668652	-0.276123	-0.281922
Ec-00_003350	pyruvate dehydrogenase E1 component subunit beta	Metabolism	OG0007259		10.5726	10.5897	9.07411	8.86905	8.6382	9.94267	9.35099	8.99291	7.76016	8.11371	7.13282	8.6639	8.49625	8.19283	7.89924	7.11355	6.22756	9.15213	9.20483	8.5966	8.83638	7.99639	7.60603	5.80191	6.61719	7.08806	7.33571	6.57895	5.999	6.44008	6.3963	8.72198	9.48539	7.76291	9.56205	9.43112	6.87444	5.8164	5.74262	5.68954	5.24904	lightgreen	-0.505184	-0.271125	-0.198466
Ec-00_003360	General transcription factor II H, polypeptide 2	Transcription	OG0008523	TAP	6.49182	6.61362	8.46166	8.49949	8.49485	7.8242	8.39202	8.58746	7.63009	7.90015	7.16363	7.43989	7.27617	7.24399	7.42744	7.39798	7.68813	7.55537	7.53698	7.51288	7.60531	7.98834	8.02974	6.51467	6.92842	8.05012	8.54515	7.06005	6.88284	8.43105	8.45422	7.14384	7.01917	7.43417	7.33086	7.5236	7.60985	7.67596	7.67763	7.80025	7.6027	greenyellow	-0.332326	-0.3071	-0.471444
Ec-00_003370	methionine sulfoxide reductase	Metabolism	OG0008522		10.0255	9.95391	9.65564	9.56915	9.37124	9.59456	10.3899	9.6341	10.433	10.1046	11.1387	9.83048	9.82601	10.2862	10.1281	10.7641	11.2227	10.9938	10.5615	10.0938	10.0751	11.1984	11.0842	9.27039	8.96571	10.6534	11.2314	8.93187	8.91103	10.6242	10.6523	9.62919	9.65094	9.97327	9.88789	8.82149	10.9523	10.2722	9.7354	10.1017	9.73236	turquoise	0.16136	-0.419867	-0.486045
Ec-00_003380	von Willebrand factor, type A	Cell wall and extracellular	OG0019495		8.7118	8.47734	8.91307	8.71861	9.02729	8.50919	8.62711	8.64542	7.66674	7.99238	8.39764	7.75314	7.73049	8.19676	7.96224	8.2044	8.18804	8.60659	8.48365	8.03633	8.08662	7.41023	7.50401	7.52238	7.3502	7.78035	7.5321	7.84269	7.88509	8.47901	8.37832	8.02367	8.08393	7.89827	7.82715	8.3945	7.9424	8.64335	8.55987	8.41905	8.88293	black	-0.499992	-0.120192	-0.192449
Ec-00_003390	Zinc finger, RING-type	Proteolysis	OG0019496		12.067	12.0104	8.00666	8.64351	8.76292	7.56987	7.47876	7.72266	8.76812	8.8568	8.08807	7.64693	7.94457	8.22007	7.6965	9.02134	8.53401	8.96943	8.67201	6.93934	7.16936	9.07943	8.98432	7.8541	7.65282	5.81057	5.94573	7.99169	8.22572	7.03332	6.72416	7.8242	8.25945	7.13849	8.75792	6.84385	6.92406	7.95685	8.3858	7.23103	7.66252	blue	-0.378854	-0.311491	-0.160647
Ec-00_003400	Zinc finger, RING/FYVE/PHD-type	Cellular regulation and signalling	OG0019497		11.2524	10.9453	7.31271	7.47488	8.11274	6.15636	6.27241	6.4974	6.66177	6.71186	6.95051	6.27716	6.26435	7.1006	6.77974	6.53379	4.98156	7.38258	6.70864	7.16643	7.26067	7.34868	7.45797	8.82812	8.74064	4.30323	4.39691	9.13389	9.06089	6.45386	5.78962	7.72403	8.15305	7.55227	9.12016	8.23812	5.9359	8.49501	9.68179	8.57445	9.0574	magenta	-0.0462701	0.358408	0.439248
Ec-00_003410	Beta-grasp domain	Metabolism	OG0008033		10.8825	10.496	10.7316	10.8001	10.6874	10.6696	11.1161	10.9241	11.1716	11.1795	11.38	11.1366	10.9804	11.1302	11.2461	11.5399	11.1116	11.3208	11.1822	10.8186	10.9876	11.4143	11.2688	11.1361	11.0298	10.9493	10.9919	10.9792	10.9597	10.8054	10.6687	11.0827	11.023	10.9523	10.8614	10.7978	11.2964	10.1699	10.3486	10.4736	10.4794	purple	0.0888816	-0.456522	-0.444844
Ec-00_003420	expressed unknown protein	Unknown	OG0019498		11.1988	11.256	10.0594	10.5165	9.87353	10.8057	10.4656	10.336	10.1923	10.6689	9.85553	10.4007	10.4413	10.0701	10.2167	10.7926	10.1459	10.6462	10.5781	10.1063	10.378	10.9192	10.9353	10.9618	11.2367	10.3856	10.1554	11.4978	11.314	9.92941	9.82213	10.2177	10.1981	10.5848	10.4088	10.3379	9.83798	9.47991	9.30512	9.39764	8.9354	blue	-0.223514	-0.0946299	-0.0985838
Ec-00_003430	conserved unknown protein	Unknown	OG0008032		8.40596	8.85827	8.9384	8.60003	8.76859	8.74422	8.37058	8.55759	9.27493	9.01908	8.61386	8.81009	9.03595	9.0325	8.73308	9.31513	9.47117	9.59487	10.1491	9.40944	9.88014	9.20632	9.2948	8.2162	8.77131	8.81641	8.86563	9.07235	8.71353	9.39544	9.19179	8.8761	8.92598	9.01923	9.64154	11.723	9.58644	10.176	10.2929	9.50975	9.82689	black	0.429115	0.232437	0.0996337
Ec-00_003440	Leucine rich repeat receptor kinase	Cellular regulation and signalling	OG0000029		7.55378	7.1396	3.02081	2.52327	2.61807	4.2158	3.68829	3.35014	5.83471	5.91029	7.9178	6.83671	8.80343	9.06291	8.3248	7.22554	6.41164	8.70162	8.62261	6.42021	6.28752	4.47995	4.3221	9.74342	10.0391	6.7833	6.04438	10.677	11.0873	7.67174	7.20873	6.44314	7.34335	6.42552	6.18456	7.60119	4.33345	9.53477	9.86547	8.66025	9.03211	brown	0.667362	0.449522	0.573062
Ec-00_003450	Hypothetical protein	Unknown	OG0019499		0	0	0	1.12909	0	0	0	1.21034	0	0	0	0	0.462012	0	0	3.31352	0	4.18987	3.45744	0	2.25147	0	0	0	0	0	0	0	0	0	0	0	0.853573	0	0	2.34107	2.35214	5.26469	5.8268	4.15943	4.84659	black	0.267658	0.133144	0.0811866
Ec-00_003460	putative tRNA methyltransferase	Protein synthesis	OG0008031		9.24361	9.36182	7.08968	6.87463	6.8552	7.73771	6.96422	7.18519	6.66177	6.94516	6.42321	6.67318	6.86889	7.33934	7.36178	5.96522	6.27583	6.7074	6.63808	7.20414	7.21574	6.82349	6.86931	6.78892	7.15799	6.95337	6.83271	6.9407	6.72381	6.84225	6.78677	7.61932	7.18835	7.18463	7.08566	6.76513	7.16324	6.42048	6.24909	6.01313	6.12754	blue	-0.370029	0.13678	0.156107
Ec-00_003470	Potassium channel	Membrane function and transporters	OG0019500		9.4596	9.62055	8.66756	8.11697	9.01301	7.52467	7.10587	7.9543	8.2453	8.12054	8.54533	7.0138	6.86423	7.11725	6.37343	6.7884	6.47503	7.63457	7.82596	6.4041	6.32184	7.05694	6.79719	7.63206	7.44566	4.68965	4.56586	7.73919	7.53198	5.82857	5.60504	6.50164	7.24701	6.78625	6.79008	8.32302	7.1494	7.73227	7.88163	7.07316	7.26922	blue	-0.565474	-0.225289	-0.217827
Ec-00_003480	expressed unknown protein	Unknown	OG0008030		7.86043	8.24102	8.41429	8.29111	8.28109	7.75738	7.708	8.13374	8.81242	8.95175	8.09608	6.34666	6.27141	5.88661	6.24632	8.04868	7.87207	7.26304	7.3175	7.26784	7.26949	6.54481	6.98203	6.94392	6.78977	6.12735	6.07271	6.66754	7.01083	6.33231	6.15658	6.28189	6.30145	6.39967	6.64603	7.85033	7.17695	7.78647	7.64709	7.98893	8.28846	midnightblue	-0.594124	-0.331305	-0.521833
Ec-00_003490	D1LIC, cytoplasmic dynein 1 light intermediate chain	Cytoskeleton and flagella	OG0000569		10.0858	10.2755	9.77059	9.70668	9.56641	9.38291	9.46056	9.47006	9.71489	9.3124	9.31202	9.34217	9.12447	9.07788	9.32929	9.91362	9.7399	9.86705	9.85268	9.61587	9.55895	9.70586	9.74804	9.32338	9.48642	9.33284	9.38842	9.67524	9.5288	9.3175	9.32872	9.18755	9.06832	9.32295	9.30369	9.92623	9.7071	9.14445	9.35558	9.28511	9.88455	red	-0.39159	-0.171137	-0.352185
Ec-00_003500	expressed unknown protein	Unknown	OG0019501		10.3248	10.1026	10.0322	9.96841	10.0998	9.96399	10.0623	9.9012	11.2811	11.0406	11.0591	9.40216	9.44275	9.57646	9.53105	10.1277	9.83559	10.8796	10.9176	10.2176	10.2546	10.1592	10.0671	11.1659	9.9336	9.45005	9.48644	9.88838	10.5661	9.28318	9.33397	9.97145	9.99007	9.11367	9.91957	10.3581	9.36179	9.28661	9.91599	9.46011	9.98607	turquoise	-0.223983	-0.270475	-0.458623
Ec-00_003510	Hypothetical protein	Unknown	OG0019502		6.97266	6.76415	0	2.52327	2.61807	1.97463	2.574	1.21034	0	2.30532	1.33033	2.83278	4.56363	7.54413	6.84805	3.95704	1.8276	1.86945	1.80579	6.05788	6.28752	4.56901	2.74432	0.731276	2.48435	1.07211	1.20709	1.70947	4.06514	0	4.21601	0.848085	0.853573	0.59332	1.32325	0	0	2.0895	1.05124	0	0	darkturquoise	-0.0690746	-0.197237	0.158525
Ec-00_003520	ER lumen protein retaining receptor	Membrane function and transporters	OG0019503		6.34159	6.61362	6.52494	6.1981	6.15455	7.32822	7.1468	7.2613	6.53534	6.4113	6.44845	7.41098	7.53589	7.45523	7.20132	6.6981	6.27583	6.74358	6.75938	7.18541	7.14081	6.73002	7.29296	7.8081	7.80881	7.03447	7.30021	7.19285	7.07081	7.16481	7.06457	7.37001	7.17633	7.66505	7.3902	7.33662	6.94023	6.92448	6.71443	6.92697	6.30693	red	0.468715	0.383802	0.5191
Ec-00_003530	Biotin/lipoate A/B protein ligase	Protein binding or modification	OG0019504		10.5976	10.5997	9.0855	8.90879	8.68098	8.82101	8.90274	8.95139	9.16393	8.98207	8.78709	8.90875	8.68405	9.08636	8.68604	8.98042	8.78809	8.5718	8.64528	8.46689	8.63269	9.11314	9.09874	9.20896	9.09258	8.25404	8.28759	9.61385	9.48125	8.66376	8.68541	8.48159	8.69407	8.68665	8.74408	8.78205	8.21246	8.95394	8.92705	8.55468	8.58746	blue	-0.36281	-0.0511895	0.0534636
Ec-00_003540	hypothetical protein	Unknown	OG0005900		5.9841	6.25526	8.33385	7.90466	8.01102	7.51314	7.81978	7.69548	7.94062	8.42083	7.80508	6.62923	6.30624	5.90591	6.46327	6.97941	7.51796	7.4166	7.51746	7.36259	7.3128	5.9232	6.077	5.80191	5.86095	7.2166	7.08994	6.54427	6.62725	7.21826	7.23517	6.42981	6.19424	6.48408	5.78352	7.77197	7.7812	7.17257	7.09995	7.11428	7.69152	yellow	-0.426287	-0.259333	-0.597093
Ec-00_003550	hypothetical protein	Unknown	OG0019505		4.23263	5.05783	7.84639	7.80095	7.59145	8.56048	7.75508	7.39119	6.80018	6.79958	6.01376	5.17854	4.77728	4.7277	4.83973	8.15999	7.58654	8.07171	7.95492	6.95047	7.32131	4.73216	5.41972	5.74976	5.53299	5.69251	4.95886	5.8137	6.11749	4.9541	4.84519	4.97288	4.78816	4.8314	4.00206	9.10865	7.51589	6.62469	6.89425	6.30121	7.44982	black	-0.38359	-0.264804	-0.533282
Ec-00_003560	PCI domain protein	Proteolysis	OG0008084		7.86043	7.68385	8.29515	8.1655	8.37341	7.9492	8.64508	8.67355	8.9226	8.74634	9.08943	9.68108	10.0057	10.487	9.91525	9.56124	9.50953	9.8793	9.79912	9.11254	9.21073	9.77768	9.99905	8.54674	8.93508	9.46137	9.2547	8.92064	8.5806	9.46087	9.44571	9.49885	9.5736	9.43003	9.63882	8.76192	8.94748	9.3127	9.53729	8.91029	9.18526	red	0.726705	-0.138459	0.150651
Ec-00_003570	Hypothetical protein	Unknown	OG0019506		4.23263	6.03601	4.94899	4.99401	4.99257	4.92137	5.44657	5.28924	3.86722	5.02424	4.74138	5.57588	6.20653	7.0581	6.25263	6.34832	6.5158	6.67029	6.8084	6.58648	6.71955	6.78682	6.19395	4.63016	4.12215	5.9065	5.91477	3.09897	4.06514	6.30216	6.25582	5.64981	5.97116	5.54795	6.1771	4.54642	5.61179	5.8164	5.22722	5.00647	5.43203	grey	0.305737	-0.241614	-0.0183217
Ec-00_003580	hypothetical protein	Unknown	OG0019507		0	0	0	0	0	0	0	0	0	0	0	4.87409	4.63111	4.68365	4.77102	2.45179	3.64069	2.93259	4.3017	1.94599	3.72525	1.27561	0	0	0.728178	1.68033	0.522295	1.32976	0	0	0.83311	1.58509	0.853573	1.82521	0	0	1.24404	0	0	0	0	NA	NA	NA	NA
Ec-00_003590	hypothetical protein	Unknown	OG0019508		0	0	0	0	0	0	0	0	0	0	0	0	0	0	0	0	0	0	0	0	0	0	0	0	0	0	0	0	0	0	0	0	0	0	0	0	0	0	0	0	0	NA	NA	NA	NA
Ec-00_003600	DNA helicase Pif1 like	DNA or chromatin modification	OG0019509		0	0	0	0	0	0	0	0	0	0	0	0	0	0	0	0	0	0	0	0	0	0	0	0	0	0	0	0	0	0	0	0	0	0	0	0	0	0	0	0	0	NA	NA	NA	NA
Ec-00_003610	Hypothetical protein	Unknown	NA		0	0	1.27694	0	0	1.30166	0.993432	1.21034	1.4325	1.21055	0	0	0.462012	0	0	0	0	1.21845	0	0	0	1.27561	0	2.49076	1.85845	0	0	0.812953	0	0	0	0	0	0	0	0	1.24404	0	0	0	0	NA	NA	NA	NA
Ec-00_003620	expressed unknown protein	Unknown	OG0019510		0	3.55699	3.78756	5.04678	2.97312	5.53665	5.07469	4.06756	4.16924	3.68126	3.53633	5.20872	5.33113	5.10699	5.01337	5.32628	4.23621	3.538	2.58314	3.63368	4.16411	4.65289	4.88282	0	0	0	0	0.812953	0	0	0	4.30762	3.79821	6.46759	4.30587	3.48116	2.35214	0	0	0	0	lightgreen	-0.242543	-0.606838	-0.340773
Ec-00_003630	Hypothetical protein	Unknown	NA		0	0	0	1.12909	1.43994	2.43173	0	0	0	0	0	0	0	0	0	0	0	0	0	0	0	0	0	0	0	0	0	0	0	0	0	0	0	0	0	0	0	0	0	0	0	NA	NA	NA	NA
Ec-00_003640	hypothetical protein	Unknown	OG0019511		0	0	0	1.12909	0	0	0.993432	0	0	0	0	2.15218	1.52973	0	2.99857	0	1.8276	1.21845	0	0	0	1.27561	2.26318	0	1.20982	0	0	1.32976	1.24404	0	0	1.13761	0.489014	1.01252	0.460032	0	0	0	0	0	0	NA	NA	NA	NA
Ec-00_003650	expressed unknown protein	Unknown	OG0019512		9.20062	8.18873	7.93296	8.56879	8.26511	7.70769	7.99251	7.22375	7.64241	7.60137	8.05559	6.25564	4.96333	6.53334	6.66135	7.78186	7.1022	7.33595	6.90171	5.65685	5.74587	8.14139	7.7403	2.10452	1.20982	0	0.522295	4.85807	3.80753	0	0	5.50481	5.8041	5.09028	5.26893	6.49935	6.30397	0	0	0	0	lightgreen	-0.578344	-0.649933	-0.569359
Ec-00_003660	expressed unknown protein	Unknown	OG0019513		8.5838	8.29148	6.87905	7.17645	6.379	6.15636	6.39638	6.14237	6.98569	7.0774	5.94449	5.88709	5.4101	4.44065	5.28381	5.77219	4.98156	5.44171	6.17277	4.88412	5.40526	5.98923	5.7604	2.49076	3.25325	2.70321	1.45678	3.22108	2.35214	0.874424	1.11921	5.19396	5.19009	5.66829	3.86003	6.08962	5.19313	0	0	0	0	lightgreen	-0.60783	-0.551085	-0.49862
Ec-00_003665	lncRNA	Unknown	NA		7.33267	7.52421	2.74265	3.54657	3.69951	3.66915	2.98849	3.94983	0	1.21055	1.33033	0.820122	1.52973	0	4.8892	2.45179	1.1857	2.3164	1.16871	7.3709	6.6804	3.25187	2.74432	8.9659	8.94472	6.19404	6.09129	9.28155	9.34367	6.90378	6.72416	9.01087	8.42949	7.8828	7.94617	9.36592	6.05946	7.39818	7.39472	6.04183	6.93515	salmon	0.309045	0.928784	0.692285
Ec-00_003670	hypothetical protein	Unknown	OG0000100		0	0	0	0	2.61807	0	0	0	0	0	0	0	0	0	0	0	0	0	0	2.26425	0.95637	0	0	1.57547	0	1.07211	0.904947	2.4701	1.90196	1.41498	1.11921	2.53622	1.14434	1.01252	0.808298	2.82785	0	2.0895	1.65288	1.20016	1.02048	NA	NA	NA	NA
Ec-00_003675	lncRNA	Unknown	NA		7.33267	6.61362	4.28557	4.8823	4.43009	7.74758	6.05312	3.94983	2.96284	2.92054	2.47088	2.38144	1.3276	1.76139	3.11403	0	0	1.21845	3.28344	7.6558	7.41173	0	0	6.55574	6.57807	5.87974	7.54227	6.28899	6.70501	7.28915	6.90908	8.60975	8.03373	6.77289	8.3581	8.2859	7.46091	6.60069	7.06572	6.89587	6.16938	salmon	0.106398	0.87212	0.560717
Ec-00_003680	Hypothetical protein	Unknown	OG0019514		3.3074	0	0	1.75464	1.43994	3.82641	1.5762	0	0	1.21055	0	0	0	0	0.999185	0	0	0	1.16871	2.26425	2.92276	0	0	1.57547	2.6444	2.43563	4.5922	1.32976	1.24404	4.89472	3.57789	5.3436	4.6326	3.27025	4.57954	3.7225	3.4033	2.9092	2.07619	2.29071	2.84228	NA	NA	NA	NA
Ec-00_003690	expressed unknown protein	Unknown	OG0019515		9.78476	9.90613	1.94355	5.45087	4.73857	7.10074	6.61633	5.28924	6.84352	7.33396	5.43992	3.76889	2.89081	0	7.52194	2.12208	1.1857	5.68439	6.09588	11.2713	10.7624	0	0	11.053	11.213	10.6006	11.3955	11.085	11.168	11.9017	11.8122	12.1288	11.8648	11.3236	11.8132	11.9304	10.8629	11.3963	11.7015	11.0796	10.2909	salmon	0.35957	0.939098	0.595419
Ec-00_003695	lncRNA	Unknown	NA		4.23263	0	3.02081	2.79411	2.61807	4.77465	3.98766	4.06756	3.48477	3.35047	2.0105	0.820122	0.462012	0	1.41402	0	0	2.3164	1.16871	6.23225	5.81979	0	0	6.27747	5.97075	6.54859	7.30817	6.21742	5.999	6.67586	6.54256	6.90949	6.07842	5.91933	6.50997	7.47496	6.57642	6.33578	6.05334	5.36553	4.62396	salmon	0.283621	0.859316	0.445184
Ec-00_003700	hypothetical protein	Unknown	OG0019516		0	5.05783	1.27694	1.75464	2.97312	1.97463	2.574	3.52499	2.96284	3.52533	0	0.467569	0	0	1.73582	0	0	1.21845	1.80579	5.97305	5.43693	0	0	4.77633	4.3248	5.79633	7.15762	4.52025	4.23204	6.62804	6.89019	6.91428	5.924	5.29107	5.92401	4.97732	5.76488	5.06867	5.18531	4.35508	3.84516	salmon	0.338899	0.854875	0.482839
Ec-00_003710	expressed unknown protein	Unknown	OG0019517		0	0	0	1.12909	1.43994	0	0.993432	1.21034	0	2.64548	0	0	0	0	0.736313	0	0	0	0	1.53706	1.93405	1.27561	1.53617	4.07404	4.37131	1.07211	1.45678	4.26027	4.33346	2.1154	1.90123	3.60899	3.18106	3.34438	3.70247	3.7225	0	3.1922	3.41288	1.84612	0	NA	NA	NA	NA
Ec-00_003720	DNA helicase Pif1 like	DNA or chromatin modification	OG0019518		4.23263	0	0	0	0	0	0.993432	0	0	0	0	0	0	0	1.41402	1.08252	0	1.21845	0	4.45432	4.00421	0	0	3.75937	4.62268	3.93852	3.34497	5.1316	4.47336	4.52868	4.27544	5.31489	4.76694	4.85695	3.93279	6.29036	4.00492	4.24093	3.41288	2.29071	3.94488	salmon	0.53405	0.929107	0.662668
Ec-00_003730	expressed unknown protein	Unknown	OG0019519		4.23263	4.49436	1.27694	1.12909	0	1.97463	1.99014	0	1.4325	0	0	0.467569	0.462012	0	3.36776	0	1.1857	0	1.80579	5.65685	5.91281	0	0	7.7867	7.68999	4.0387	4.36672	8.0256	8.52808	6.63411	6.38959	8.67192	8.58916	7.63951	7.46877	8.58224	5.13812	7.32683	7.37621	6.61947	6.32556	salmon	0.504546	0.959666	0.746947
Ec-00_003740	Harbinger transposase-derived protein	Transposon or viral gene	OG0003473		3.3074	0	0	0	0	1.30166	1.99014	0	0	0	0	0	0	0	1.99878	0	0	1.21845	0	5.13899	4.66965	0	1.53617	6.65358	6.64585	6.12735	5.80648	6.57895	6.44662	5.87027	5.48431	4.7972	5.00308	4.7789	4.99082	6.36344	5.48527	5.26469	5.18531	4.26057	4.36059	salmon	0.54099	0.928744	0.642431
Ec-00_003750	hypothetical protein	Unknown	OG0019520		0	0	0	0	0	0	0	0	0	0	0	1.72101	0	0	1.99878	0	0	0	0	0.964221	0	0	0	0	0	0	0	0	0	0	0	0	0	0	1.08863	2.34107	0	0	0	0	0	NA	NA	NA	NA
Ec-00_003760	hypothetical protein	Unknown	OG0019521		0	0	0	1.75464	0	0	0	0	0	0	0	0	0	0	0	3.14146	2.27029	4.78342	4.95208	1.94599	3.3791	0	0	0	0	0	0	0	0	0	0	0	0	2.18935	0	4.77789	0	0	0	0	0	NA	NA	NA	NA
Ec-00_003770	hypothetical protein	Unknown	OG0000087		0	0	0	0	0	0	0	0	0	0	0	0	0	0	0.41463	0	0	1.21845	0	0	0	2.39589	1.53617	3.75937	3.43938	0	0	0	2.14454	0	0.475874	0	0	0	0	0	0	0	0	0	0	NA	NA	NA	NA
Ec-00_003780	hypothetical protein	Unknown	OG0019522		0	3.55699	3.45454	2.52327	3.69951	2.77832	2.574	2.30503	0	0	0	0	0	0	0	2.12208	2.88239	0	0	0	0	1.27561	2.26318	0	0	0	0	0	0	0	0	0	0	0	0	0	0	0	0	0	0	NA	NA	NA	NA
Ec-00_003790	hypothetical protein	Unknown	OG0019523		0	0	0	1.12909	0	0	0	0	1.4325	0	0	0.820122	1.09247	0	0	3.31352	2.60856	0	0	0	0	2.74071	1.53617	0	0	0	0	0	0	0	0	0.848085	0.853573	0	0	0	0	0	0	0	0	NA	NA	NA	NA
Ec-00_003800	conserved unknown protein	Unknown	OG0000021		0	0	0	0	0	1.30166	0	0	0	0	0	0	0.811408	0	0	0	0	0	0	0	0	0	0	0	0	0	0	0	0	0	0	0	0.489014	0.59332	0	0	0	0	0	0	0	NA	NA	NA	NA
Ec-00_003810	hypothetical protein	Unknown	OG0019524		0	0	0	0	0	0	0	0	0	0	0	0	0	0	0	1.08252	1.1857	0	0	0	0	1.27561	0	4.18291	4.22703	5.30698	4.23923	2.25822	3.20346	1.16987	1.56257	0	0	0.59332	0	0	0	1.39397	0	1.20016	1.6122	NA	NA	NA	NA
Ec-00_003820	MULE transposase domain	Transposon or viral gene	OG0000089		3.3074	5.05783	3.02081	3.21885	0	0	0.993432	1.21034	0	1.21055	0	0.820122	0	0.845388	0.41463	1.69398	1.8276	0	0	0.964221	0	1.94186	0	1.57547	0.728178	1.90929	1.85496	1.70947	1.61018	0.874424	1.35786	0.485483	0	1.33694	0.460032	0	0	1.39397	0	0	1.02048	NA	NA	NA	NA
Ec-00_003830	Hypothetical protein	Unknown	OG0019525		0	0	0	1.12909	1.43994	0	0.993432	0	0	1.21055	0	0	0	0	0.736313	0	1.1857	1.21845	1.16871	0	0	1.27561	0	3.82804	2.91943	0	1.66957	1.70947	2.14454	0.502471	0	1.58509	0.489014	1.33694	0	0	0	0	0	0	0	NA	NA	NA	NA
Ec-00_003840	hypothetical protein	Unknown	OG0000100		0	0	1.27694	1.12909	0	0	2.79608	1.85911	0	0	0	0	0.462012	0	0.736313	0	1.1857	1.21845	0	0	0	0	0	0.731276	0	0	0	0	0.752151	0	0	0	0	0	0	0	0	0	0	0	0	NA	NA	NA	NA
Ec-00_003850	hypothetical protein	Unknown	OG0019526		0	0	0	0	0	0	0	0	0	0	0	0	0	0	0	0	0	0	0	0	0	0	1.53617	0	0	0	0	0	0	0	0	0	0	0	0	0	0	0	0	0	0	NA	NA	NA	NA
Ec-00_003860	hypothetical protein	Unknown	OG0019527		0	0	0	0	0	0	0	0	0	0	1.33033	2.90828	1.86482	0.845388	1.87328	0	0	0	0	0.964221	1.52649	4.87873	4.57306	7.69776	7.15135	2.82044	3.46382	4.47187	4.92719	3.01486	2.85841	2.63243	2.64277	1.33694	1.32325	1.60093	0	2.9092	1.65288	2.29071	2.84228	lightgreen	0.477501	0.425941	0.474783
Ec-00_003870	expressed unknown protein	Unknown	OG0000291		0	0	0	0	0	1.30166	0	0	0	0	0	1.54294	2.89081	2.88244	2.50116	0	0	0	1.16871	0.964221	0.95637	0	0	1.86411	1.85845	1.90929	0	2.00978	0.752151	0	0	0	0	0	0	0	0	0	0	0	0	NA	NA	NA	NA
Ec-00_003880	hypothetical protein	Unknown	OG0019528		0	0	0	0	0	1.97463	1.5762	0	0	1.21055	0	0.467569	0	0	0.41463	0	0	0	0	0.964221	0.95637	0	0	0	0	0	0	0	0.752151	0.502471	0	0.485483	1.38623	0	0	1.60093	0	0	0	0	0	NA	NA	NA	NA
Ec-00_003890	hypothetical protein	Unknown	OG0000255		0	0	1.27694	0	0	1.30166	2.31141	0	0	2.64548	0	3.88557	3.86677	3.93936	5.41344	0	0	1.21845	1.16871	2.52483	2.92276	1.27561	0	1.57547	2.3043	4.45599	2.01923	1.32976	0.752151	0.502471	1.11921	1.37863	1.38623	0.59332	0	1.60093	0	0	1.05124	0	0	NA	NA	NA	NA
Ec-00_003900	Hypothetical protein	Unknown	OG0019529		0	0	4.17624	3.93041	3.87821	4.98949	4.15749	4.46093	0	0	0	2.57921	2.25539	2.53119	3.41356	2.94606	0	2.93259	3.6127	2.52483	2.51149	0	0	0.731276	1.57029	3.52027	2.30046	1.70947	0.752151	1.41498	1.11921	1.76567	1.14434	1.33694	0	4.88105	2.35214	2.9092	3.0885	2.63008	2.35455	NA	NA	NA	NA
Ec-00_003910	Harbinger transposase-derived nuclease domain	Transposon or viral gene	OG0019530		8.68085	8.95536	7.27343	8.32888	7.88076	8.35634	7.19638	7.19816	7.15004	6.34287	7.25229	6.74701	6.79726	7.29611	7.17497	8.3937	8.33196	6.72561	6.50563	5.76173	6.04197	7.27117	7.60603	6.38394	6.47536	5.76743	4.87556	7.22239	7.23053	6.05338	5.84951	7.58666	7.33977	7.21458	7.2513	7.37247	4.89436	6.18253	6.34736	5.31939	5.6248	blue	-0.525695	-0.407237	-0.245694
Ec-00_003920	expressed unknown protein	Unknown	OG0019531		0	0	6.56886	7.45549	6.52032	8.14111	6.61633	6.16896	1.4325	0	2.0105	0	0	0	0.41463	4.15105	4.41925	2.3164	1.16871	4.63083	4.43891	0	0	0.731276	0	1.07211	0	1.32976	0	0	0	0	0	0	0	6.1733	3.87637	5.73053	5.9319	5.22243	5.76783	black	-0.468296	-0.151559	-0.29407
Ec-00_003930	hypothetical protein	Unknown	OG0019532		0	0	0	0	0	0	0	0	0	0	0	3.64193	1.86482	4.63821	5.53238	1.08252	1.8276	0	0	1.53706	0	0	0	2.79514	3.03949	3.65263	0.904947	1.32976	2.14454	0	1.56257	1.92615	1.59332	3.02184	1.525	0	0	1.39397	0	0	0	darkred	0.417398	0.159258	0.49769
Ec-00_003940	hypothetical protein	Unknown	OG0019533		0	0	0	0	0	0	0	0	0	0	0	4.18785	3.38357	5.80673	6.92912	0	0	0	0	0.964221	1.52649	0	0	4.7051	5.31238	4.89069	3.28166	0.812953	2.8397	0	2.04477	3.35068	1.93523	3.83052	1.08863	0	0	0	1.05124	0	0	darkred	0.393784	0.249099	0.532467
Ec-00_003950	hypothetical protein	Unknown	OG0019534		0	0	0	0	1.43994	0	0	0	0	0	0	2.27136	1.86482	3.03046	4.41348	0	0	0	0	0	0	1.27561	1.53617	1.86411	1.85845	2.70321	1.66957	0	0	0.502471	0	0.848085	0.489014	0	0	0	0	0	0	0	0	NA	NA	NA	NA
Ec-00_003960	Hypothetical protein	Unknown	OG0019535		0	0	1.94355	0	1.43994	1.97463	5.47898	1.21034	2.6082	2.92054	0	9.58297	9.03802	10.5588	10.7718	5.0624	2.88239	3.538	3.99795	7.47482	9.5372	5.29892	5.9934	8.6711	9.78906	9.5616	7.83466	6.31665	5.91968	0	5.73774	3.40617	2.64277	1.33694	1.32325	0	0	1.39397	0	0	2.35455	darkred	0.326588	-0.0658167	0.239485
Ec-00_003970	expressed unknown protein	Unknown	OG0019536		0	0	0	0	0	0	0	0	0	1.21055	0	0.820122	0.462012	0	0.736313	0	0	1.21845	0	0	0	0	0	1.21426	0	0	0	0.812953	0.752151	0	0	0.485483	0	0.59332	0	0	0	0	0	0	0	NA	NA	NA	NA
Ec-00_003980	Hypothetical protein	Unknown	NA		0	0	0	2.52327	0	0	0	1.21034	0	1.21055	0	0	0	0	0	0	0	0	0	0	0	0	0	1.21426	1.85845	0	1.66957	0	0.752151	0	0	0	0	0	0	0	0	1.39397	2.07619	0	0	NA	NA	NA	NA
Ec-00_003990	hypothetical protein	Unknown	OG0019537		6.86662	6.25526	2.74265	3.54657	2.61807	4.32529	2.79608	2.64517	2.96284	2.64548	1.33033	1.33977	1.86482	0	1.22146	0	1.1857	0	0	0	0.95637	0	0	0	0	0	0	0	0	0	0	0	0	0	0	0	0	0	0	0	0	brown	-0.790341	-0.322495	-0.280984
Ec-00_004000	Sulfotransferase	Metabolism	OG0000095		0	0	0	0	0	0	2.79608	0	2.6082	2.30532	0	5.67649	6.99805	2.06591	1.58388	4.15105	2.88239	1.86945	1.80579	4.57436	6.33871	4.38502	4.88282	0	0	0	0	0	0	0	0	2.43312	2.07993	3.60783	0.808298	1.60093	0	0	0	0	0	grey	0.256244	-0.373548	-0.00730372
Ec-00_004010	hypothetical protein	Unknown	OG0019538		3.3074	0	0	0	0	0	0	0	0	0	0	0	0.462012	0	0	0	0	0	0	0	0	0	0	0	0	0	0	0	0	0	0	0	0	0	0	0	0	0	0	0	0	NA	NA	NA	NA
Ec-00_004015	lncRNA	Unknown	NA		10.062	10.1716	9.32522	8.8357	8.43183	9.62164	9.29292	8.65485	9.81626	9.42976	10.1814	10.2031	10.0846	11.2426	10.7398	9.09985	8.94931	9.09726	8.93372	8.04154	8.79116	10.0397	10.2605	11.0672	11.1468	8.21442	7.50117	11.0673	10.7418	8.74445	8.64233	9.93123	9.75498	10.1702	10.2403	10.2418	9.59922	8.12613	7.20853	6.81504	3.20613	purple	-0.0475103	-0.114092	-0.0243806
Ec-00_004020	expressed unknown protein	Unknown	OG0019539		5.9841	4.49436	4.17624	4.99401	4.43009	3.96821	4.68778	5.23993	5.95813	5.77833	5.67192	4.94751	5.21864	4.68365	4.82286	4.32204	4.98156	5.30312	4.39023	1.94599	3.24242	6.40666	6.49683	3.95628	4.17554	2.10685	2.01923	4.01222	4.12294	2.1154	1.35786	2.72263	3.6203	3.83052	2.72979	4.66679	2.97141	2.0895	1.65288	1.20016	2.35455	grey60	-0.426506	-0.71321	-0.541627
Ec-00_004030	hypothetical protein	Unknown	OG0019540		0	0	0	0	0	0	0	0	1.4325	0	0	0.820122	0.811408	0	0.41463	1.69398	2.27029	0	0	0	0	4.28341	4.01809	6.61524	6.71059	7.29466	6.36002	4.61241	4.51713	2.68174	2.29502	0.485483	0	6.11203	0	0	0	3.42868	2.40305	2.63008	4.20836	lightgreen	0.37738	0.360387	0.280607
Ec-00_004040	expressed unknown protein	Unknown	OG0019541		0	0	0	0	0	0	0	0	0	0	0	0	0	0	0	0	0	0	0	0	0	0	0	0	0	0	0	0	0	0	0	0	0	0.59332	0	0	0	0	0	0	0	NA	NA	NA	NA
Ec-00_004050	hypothetical protein	Unknown	OG0019542		0	0	0	2.18955	0	0	2.31141	0	0	0	0	0.820122	0	0	0	0	0	0	0	0	0	1.27561	1.53617	0.731276	1.57029	0	1.20709	1.70947	2.14454	0	0	0	0	0	0	0	0	0	0	1.84612	0	NA	NA	NA	NA
Ec-00_004060	hypothetical protein	Unknown	OG0019543		0	0	0	0	0	0	0	0	0	0	0	0	0.462012	0	0	0	0	0	0	0	0	0	0	0	0	0	0	0	0	0	0	0	0	0	0	0	0	0	0	0	0	NA	NA	NA	NA
Ec-00_004070	Hypothetical protein	Unknown	OG0019544		3.3074	0	2.39774	3.02206	3.25783	5.34193	4.15749	4.06756	6.39674	5.81247	5.43992	3.11363	2.89081	2.71748	3.27156	3.31352	3.64069	3.69406	3.28344	3.10569	2.51149	3.62854	3.63244	6.08046	5.16176	2.70321	2.64036	5.25109	5.05147	2.93851	2.77851	3.86808	4.06488	2.60577	3.32391	4.27056	2.69475	4.11103	4.34351	3.33394	3.03565	purple	0.0598552	-0.0479807	-0.218982
Ec-00_004080	hypothetical protein	Unknown	OG0019545		0	0	0	0	0	0	0	0	0	0	0	0	0	0	0	0	0	0	0	0	0	0	0	0	0	0	0	0	0	0	0	0	0	0	0	0	0	0	0	0	0	NA	NA	NA	NA
Ec-00_004090	hypothetical protein	Unknown	OG0000154		0	0	0	0	0	0	0	0	0	0	0	1.54294	0	1.76139	1.87328	0	0	0	0	0	0	0	0	0	0	0	0	0	1.24404	0	0	1.92615	0	1.01252	0	0	0	0	0	0	0	NA	NA	NA	NA
Ec-00_004100	expressed unknown protein	Unknown	OG0019546		0	0	0	1.12909	0	0	1.99014	0	0	0	0	3.50271	4.65292	4.38672	5.62289	3.84928	3.11244	0	0	1.53706	2.25147	1.94186	1.53617	2.10452	2.09853	1.40803	0.904947	2.25822	2.35214	0.502471	0.475874	3.35068	3.41733	4.54742	1.525	0	0	0	0	0	0	darkred	0.369004	-0.0539932	0.370562
Ec-00_004105	lncRNA	Unknown	NA		4.23263	4.49436	2.39774	3.21885	1.43994	5.66717	5.63096	2.92022	4.29944	3.35047	4.74138	5.68725	5.11245	6.46992	7.10342	4.15105	3.64069	1.21845	1.80579	1.94599	2.92276	4.05581	3.63244	7.23692	8.44696	5.49506	3.40562	6.38356	5.48528	2.58488	2.50821	5.41298	5.28272	6.39095	3.37703	0	0	4.24093	0	0	0	black	0.0333377	-0.0446582	0.18346
Ec-00_004110	DDE superfamily endonuclease, CENP-B-like	DNA or chromatin modification	OG0019547		0	0	1.27694	1.12909	0	1.30166	1.99014	1.21034	0	0	2.0105	0.820122	0	0	0	0	0	0	0	0	0	0	0	0.731276	0	0	0	0	0.752151	0	0	0	1.14434	0.59332	0	0	0	1.39397	0	1.20016	0	NA	NA	NA	NA
Ec-00_004120	Hypothetical protein	Unknown	OG0019548		0	3.55699	0	0	0	0	0	0	0	0	0	0	0	0	0.736313	0	0	0	0	0	0	0	1.53617	0	0	0.633432	0	0	0	0	0	0.848085	1.38623	0.59332	0.460032	0	0	0	0	0	0	NA	NA	NA	NA
Ec-00_004125	lncRNA	Unknown	NA		0	0	0	1.12909	0	1.97463	4.57235	0	0	0	0	0.467569	0	1.3749	0	2.12208	0	2.65715	1.16871	1.94599	3.24242	5.24588	4.01809	3.44647	3.75215	3.37452	2.91525	4.61241	3.49372	0	0	0	0.489014	0	0	0	0	0	1.05124	0	0	NA	NA	NA	NA
Ec-00_004130	expressed unknown protein	Unknown	OG0019549		3.3074	0	1.94355	3.02206	2.14606	3.05756	4.23546	1.85911	5.12858	4.83791	5.4894	7.06831	6.43769	6.62936	6.99838	3.84928	4.58167	6.44713	6.40298	2.52483	3.61883	7.68387	7.83939	5.83565	6.82361	4.75001	3.34497	7.00161	6.32875	3.40363	3.20257	5.06197	4.96631	6.76616	2.35932	0	1.24404	3.96828	2.8941	2.63008	2.35455	grey	0.364315	-0.291239	0.00113068
Ec-00_004140	Hypothetical protein	Unknown	OG0019550		0	0	0	1.12909	0	1.97463	4.51097	0	1.4325	0	1.33033	5.80057	6.25011	7.16609	6.7172	2.94606	1.1857	2.93259	2.58314	2.74547	4.08637	1.27561	0	3.68728	5.05184	5.83864	4.06217	3.43809	2.53359	0	1.74182	0.848085	0.853573	0	0	0	0	0	1.65288	0	0	darkred	0.240178	-0.124442	0.19129
Ec-00_004150	Hypothetical protein	Unknown	OG0019551		0	0	0	0	1.43994	1.30166	3.68829	1.21034	0	0	0	0.467569	0.462012	0	1.22146	0	0	0	0	2.52483	4.00421	0	0	0	0	0	0	0.812953	0	0	0	0	0	0	0	0	0	0	0	0	0	NA	NA	NA	NA
Ec-00_004160	Nucleotide-diphospho-sugar transferase	Metabolism	OG0019552		0	0	3.02081	0	0	4.98949	7.80067	1.85911	5.49754	5.42815	3.33452	10.8454	10.5597	10.872	11.0907	4.61309	4.33063	6.40256	5.98653	7.76706	10.0485	5.49349	5.9934	9.17805	10.4887	9.16289	7.65273	8.47242	8.1478	0.502471	5.50928	5.02699	4.6326	3.02184	1.70196	0	1.90196	3.96828	2.66937	1.84612	0	darkred	0.361709	-0.104331	0.16016
Ec-00_004170	Hypothetical protein	Unknown	NA		0	0	0	0	0	0	0	0	0	0	0	0	0	0	0	0	0	0	0	1.94599	3.50394	0	0	0	0	0	0	0	0	0	0	0	0	0	0	0	0	0	0	0	0	NA	NA	NA	NA
Ec-00_004180	expressed unknown protein	Unknown	OG0019553		0	0	0	0	0	0	0	1.85911	0	0	0	0.467569	0.811408	1.76139	0	0	0	0	0	0	0	1.94186	0	0	0.728178	0	0	0	0	0	0.475874	0.485483	0	0	0	0	0	0	0	0	0	NA	NA	NA	NA
Ec-00_004190	hypothetical protein	Unknown	OG0019554		0	0	0	0	1.43994	0	0	0	0	0	0	3.34861	2.25539	3.03046	3.58347	0	1.1857	0	0	0	0	0	0	0	1.20982	0	0.904947	2.25822	0	0.502471	0	0.848085	0	0	0.808298	0	1.24404	0	1.65288	0	1.02048	NA	NA	NA	NA
Ec-00_004200	hypothetical protein	Unknown	OG0019555		0	0	0	0	2.14606	1.97463	0.993432	0	0	0	0	0	0	0	0	0	0	0	0	2.52483	3.3791	0	0	1.21426	0	0	0	0.812953	0.752151	0	0	0	0	0	0	0	0	0	0	0	0	NA	NA	NA	NA
Ec-00_004210	hypothetical protein	Unknown	OG0019556		0	0	1.94355	0	0	3.96821	6.78137	1.21034	2.6082	2.92054	2.0105	9.29986	8.94385	10.2658	10.39	4.32204	4.23621	5.09483	3.6127	7.15685	8.90024	4.28341	4.88282	7.29265	8.23067	9.41203	7.85926	5.46394	4.95927	0.874424	5.63938	3.29296	1.14434	1.60163	0.808298	0	1.24404	0	0	1.20016	2.03061	darkred	0.305556	-0.133288	0.147425
Ec-00_004220	conserved unknown protein	Unknown	OG0019557		0	0	2.74265	3.21885	1.43994	2.43173	2.98849	1.85911	2.13694	4.06791	5.83391	4.15722	3.86677	5.74377	6.41905	6.30819	4.50275	3.538	3.45744	2.93679	1.93405	4.05581	4.97287	6.55574	6.58795	3.8857	3.86031	4.47187	5.37065	2.48105	3.57789	3.40617	5.05653	4.11094	4.70948	0	1.24404	4.36008	4.74067	1.20016	3.20613	red	0.424588	-0.107063	0.0968021
Ec-00_004225	lncRNA	Unknown	NA		0	0	3.02081	0	0	3.05756	2.98849	0	0	0	0	2.27136	2.56243	2.31723	4.82286	1.08252	0	0	0	0.964221	0.95637	0	0	2.49076	3.52416	0.633432	1.45678	1.32976	1.61018	0.874424	0	0	2.73309	2.18935	2.13098	0	0	0	1.65288	0	0	NA	NA	NA	NA
Ec-00_004230	Hypothetical protein	Unknown	OG0019558		5.19374	5.77737	0	0	0	4.2158	0.993432	1.85911	0	2.64548	1.33033	2.27136	2.89081	2.71748	3.11403	1.08252	1.8276	1.21845	0	2.26425	2.73173	0	0	2.10452	2.91943	3.02968	2.30046	2.00978	2.14454	3.08738	2.93413	3.1701	3.57217	3.41489	4.13136	2.34107	0	2.5568	3.41288	2.90463	2.03061	turquoise	0.226007	0.518218	0.643044
Ec-00_004235	lncRNA	Unknown	NA		7.68436	7.52421	4.28557	4.69663	4.91277	5.70818	4.37978	4.27761	6.39674	6.36604	4.82084	6.83671	6.8828	5.35182	4.98331	5.15582	2.60856	3.96316	4.55249	5.35552	5.23559	3.78545	4.17809	8.33892	8.33408	4.34297	4.27217	7.43291	7.44401	4.33381	4.82544	5.82292	6.38043	6.61713	6.90305	7.33662	5.24611	6.90502	6.75796	5.4536	5.84731	turquoise	0.177731	0.535224	0.612137
Ec-00_004240	RGS domain	Cellular regulation and signalling	OG0019559		0	0	0	0	0	0	0	0	0	0	0	0	0	0	0	0	0	0	0	0	0	0	0	0	0	0	0	0	0	0	0	0	0.489014	0	0.460032	0	0	0	0	0	0	NA	NA	NA	NA
Ec-00_004250	Hypothetical protein	Unknown	OG0019560		6.62786	6.44554	1.94355	3.68618	4.18038	4.09731	4.68778	3.52499	5.32482	5.59435	5.94449	7.48375	7.56206	8.86265	8.44546	7.83932	7.79135	8.07171	8.38476	7.52037	8.06652	7.88805	8.2971	9.4015	9.75439	7.93134	7.67445	9.68588	9.45054	7.58986	7.35709	8.10139	8.11155	8.44692	8.17149	9.49349	8.84815	7.75419	7.36687	7.62166	7.44982	brown	0.842947	0.504497	0.550593
Ec-00_004260	RGS domain	Cellular regulation and signalling	OG0019561		0	0	0	0	0	0	0	0	0	0	0	0.467569	1.3276	3.78115	2.32062	0	0	0	0	0.964221	2.25147	0	0	1.21426	0.728178	0	0	0	0.752151	0.502471	0.83311	0	0.853573	0.59332	0.460032	0	0	0	0	0	0	NA	NA	NA	NA
Ec-00_004270	Hypothetical protein	Unknown	OG0019562		4.23263	3.55699	9.88576	9.5893	9.03674	8.76381	8.81023	8.86459	2.6082	2.30532	2.0105	0.467569	0.462012	1.76139	0	3.31352	2.88239	2.3164	2.2462	4.88412	4.91423	0	0	1.57547	2.09853	0	0	0	0	0	0	1.13761	1.14434	1.33694	2.00165	6.1733	4.51713	5.13701	5.05177	4.44377	3.94488	black	-0.730762	-0.210799	-0.336202
Ec-00_004280	expressed unknown protein	Unknown	OG0006065		8.54994	8.82439	11.4624	11.5387	11.4451	11.2846	11.9766	12.1011	10.4187	10.068	10.7772	10.7105	10.7181	10.3806	10.6524	11.0091	10.9638	10.8826	10.5591	10.457	10.3953	10.9181	10.8399	11.0276	11.0084	10.8528	11.2465	10.5553	10.7516	10.4777	10.6183	10.5488	10.2986	10.4048	9.8936	10.3311	11.0782	10.0037	9.86049	10.2148	10.2476	magenta	-0.313457	-0.379342	-0.474171
Ec-00_004290	Lactate/malate dehydrogenase, C-terminal	Metabolism	OG0006067		9.3058	9.45332	9.83944	9.91795	10.1266	11.0615	10.4015	10.165	10.662	10.6478	10.6632	9.77672	9.85629	10.1663	9.90225	10.6127	9.64662	10.5827	10.428	9.82394	9.84369	10.4446	10.4894	10.8712	11.0915	9.6563	9.65204	10.6962	10.7459	9.28607	9.16356	9.87518	9.9559	9.4925	9.80431	10.1723	9.65171	9.59978	9.76771	9.65847	9.67724	purple	-0.137712	-0.339754	-0.400127
Ec-00_004300	lipase	Metabolism	OG0006066		9.66334	9.85671	7.4004	7.65563	7.55249	7.75738	7.16684	7.11855	7.31307	7.32216	7.77547	8.71867	8.69723	8.87983	8.35299	7.38839	7.58654	7.88996	8.00485	8.49378	8.47767	8.21912	8.41423	8.32414	8.59637	7.16766	7.36273	8.5647	8.60616	8.68143	8.41512	8.98376	9.40008	8.94969	9.51913	8.2859	6.22698	9.11086	9.60043	9.10305	8.95048	turquoise	0.389196	0.440431	0.757088
Ec-00_004310	Serine O-acetyltransferase	Metabolism	OG0005055		10.0976	10.045	10.0594	9.75109	9.95048	9.60816	9.82763	9.861	9.06213	9.24212	8.9594	8.7121	9.16107	9.47189	9.56125	9.66817	8.58279	10.1475	9.90433	9.99504	9.81385	9.25746	9.26837	9.2455	9.27946	9.30671	9.3903	9.27804	9.09559	9.08825	9.18115	9.91399	10.0874	8.65604	9.61898	9.61444	7.89341	8.68959	9.1312	9.0686	9.41565	blue	-0.422654	-0.103361	-0.0729238
Ec-00_004320	expressed unknown protein	Unknown	OG0019563		4.23263	3.55699	7.44821	7.01367	6.49314	7.70769	7.89978	7.4574	9.35946	9.0869	8.92834	7.51729	6.97659	7.0054	7.47411	8.76382	8.51402	8.35505	8.44283	8.42758	8.32527	7.49223	7.00356	8.01369	7.70369	8.59778	8.46014	8.05053	8.31832	8.55768	8.54607	7.57157	7.76333	7.54836	7.91283	9.12975	9.2266	8.55868	8.53088	8.47799	9.39816	yellow	0.474507	0.114506	-0.157619
Ec-00_004330	Beta-lactamase-like	Metabolism	OG0019564		9.28537	9.60068	2.39774	3.54657	5.50907	3.05756	0.993432	3.52499	1.4325	1.21055	0	8.58844	8.63009	7.02318	6.71263	2.45179	1.8276	1.21845	1.16871	5.65685	5.79557	0	2.74432	8.71482	8.0459	2.57562	1.66957	7.07633	7.64973	5.69571	5.61658	7.8619	8.58006	8.44692	7.6279	5.85636	4.68003	7.37006	6.18675	7.61212	6.88581	turquoise	0.286693	0.628225	0.904731
Ec-00_004350	WD40 repeat	Protein binding or modification	OG0003616		7.62055	7.1396	9.11542	9.59374	9.40808	8.71434	8.83235	9.53282	8.36166	8.1936	8.49776	8.23409	7.5764	7.53176	8.21916	7.65959	8.87292	7.73683	7.58466	7.53524	7.84839	8.84989	8.71099	8.09605	7.84221	8.60188	8.78802	8.37384	7.74944	8.42232	8.5125	7.60753	7.07204	8.01635	7.46571	8.58224	9.03665	7.5687	7.90763	8.21996	8.0292	greenyellow	-0.549051	-0.345718	-0.565761
Ec-00_004360	expressed unknown protein	Unknown	OG0019565		0	0	0	1.12909	0	0	0	0	0	0	0	0	0	0	0	0	0	0	0	0	0	0	0	0	0	0	0	0	0	0	0	0	0	0	0	0	0	0	0	0	0	NA	NA	NA	NA
Ec-00_004370	expressed unknown protein	Unknown	OG0019566		0	0	1.27694	2.52327	1.43994	3.05756	4.15749	3.15114	1.4325	1.21055	2.81935	0	0.462012	0.845388	0.736313	0	0	1.86945	1.16871	0	0.95637	0	0	3.04635	3.68008	0	0	2.65481	1.24404	0	0	0	0.489014	1.01252	0	0	0	0	0	0	0	NA	NA	NA	NA
Ec-00_004375	lncRNA	Unknown	NA		0	0	0	0	0	0	0	0	0	0	0	1.10322	0.811408	2.06591	1.87328	0	0	0	0	0	0	1.27561	0	3.04635	2.09853	0	0	3.43809	4.17852	0	0.475874	4.81781	4.02967	4.45004	3.21142	0	0	1.39397	0	0	0	NA	NA	NA	NA
Ec-00_004380	Hypothetical protein	Unknown	OG0019567		4.23263	4.49436	3.63064	3.54657	2.61807	3.96821	2.574	3.15114	4.02612	3.52533	3.71335	2.90828	2.73594	3.69502	2.73558	3.73282	3.11244	3.96316	4.20738	5.09952	4.37496	2.39589	3.1045	5.65844	6.30613	4.0863	3.72407	6.42227	6.4579	3.08738	3.66935	5.02699	4.58488	4.11094	4.86631	6.39864	4.42821	3.6318	4.55572	4.68119	4.43108	salmon	0.300372	0.701281	0.451478
Ec-00_004390	Hypothetical protein	Unknown	NA		0	0	0	0	0	0	0	0	0	0	0	0	0	0	0	0	0	0	0	0	0	0	0	0	0	0	0	0	0	0	0	0	0	0	0	0	0	0	0	0	0	NA	NA	NA	NA
Ec-00_004400	ankyrin repeat protein	Membrane function and transporters	OG0019568		0	0	0	0	0	0	0	0	0	0	0	0	0	0	0	0	0	0	0	0	0	0	0	0	0	0	0	0	0	0	0	0	0	0	0	0	0	0	0	0	0	NA	NA	NA	NA
Ec-00_004420	hypothetical protein	Unknown	OG0019570		0	0	0	1.12909	0	0	0	0	0	0	0	0	0.462012	0	0	0	0	0	0	0	0	0	0	0	0	0	0	0	0	0	0	0	0	0	0	0	0	0	0	0	0	NA	NA	NA	NA
Ec-00_004430	Zinc finger, FYVE/PHD-type	Cellular regulation and signalling	OG0019571		3.3074	0	0	0	0	0	0	0	0	0	0	0.820122	0	0	0.736313	0	0	0	0	0	0	0	0	0	0	0	0	0	0	0	0	0	0.853573	0.59332	0.460032	0	0	0	0	0	0	NA	NA	NA	NA
Ec-00_004440	expressed unknown protein	Unknown	OG0000331		0	0	0	0	0	0	0	0	0	2.30532	0	2.66877	2.56243	0.845388	0	0	0	0	0	0	0.95637	1.94186	1.53617	0	0	0	0	0	0	0	0	0	0	0	0	0	0	0	0	0	0	NA	NA	NA	NA
Ec-00_004450	expressed unknown protein	Unknown	OG0019572		0	0	3.02081	3.02206	0	2.77832	0.993432	1.21034	0	0	0	0.820122	0	0	1.73582	1.08252	1.1857	0	0	3.10569	2.51149	0	0	5.11543	4.41636	0.633432	1.85496	4.52025	4.68004	3.51298	3.52989	5.38562	4.76694	5.17398	4.86631	4.41507	2.69475	2.9092	4.48839	2.63008	2.61893	NA	NA	NA	NA
Ec-00_004460	PiggyBac transposable element-derived protein	Transposon or viral gene	OG0019573		6.34159	5.05783	3.45454	1.75464	0	1.30166	1.5762	0	0	0	1.33033	1.10322	1.52973	0	3.62299	1.69398	2.88239	0	2.2462	5.42104	4.50014	0	0	7.09784	7.2542	3.58797	4.36672	7.69245	7.40377	6.76698	6.30656	6.88528	6.58224	6.99628	7.12113	7.53945	4.60088	6.2458	6.22861	5.72537	5.94689	salmon	0.438348	0.927834	0.739879
Ec-00_004470	Hypothetical protein	Unknown	OG0000015		5.19374	5.462	0	2.52327	1.43994	0	1.5762	0	0	0	0	1.10322	0	0	2.80596	0	0	1.21845	0	5.38865	4.66965	0	1.53617	7.9185	8.17276	4.0863	4.27217	8.87719	8.52272	6.30976	6.28503	6.97976	7.08496	6.53245	6.40519	6.68186	4.12294	5.89744	6.16535	5.6528	5.6248	salmon	0.434586	0.946176	0.757867
Ec-00_004480	hypothetical protein	Unknown	OG0019574		0	0	0	0	0	0	0	0	1.4325	1.85938	0	0	0	0	0.41463	0	0	0	0	0.964221	1.52649	0	0	1.57547	1.20982	2.43563	1.66957	1.32976	1.90196	1.41498	1.11921	1.13761	2.21144	0.59332	0	0	2.69475	1.39397	1.05124	0	0	NA	NA	NA	NA
Ec-00_004490	conserved unknown protein	Unknown	OG0019575		4.79178	5.462	0	1.12909	0	0	1.5762	0	1.4325	0	0	0.820122	0.811408	0	4.64229	2.12208	0	2.3164	2.2462	7.57895	6.81903	0	1.53617	8.01369	8.25877	5.28674	6.66299	8.50885	8.38481	8.70178	8.76402	8.54632	8.12413	8.92272	7.73096	7.26213	6.17327	7.61736	7.16608	6.94228	6.22994	salmon	0.578431	0.958471	0.740833
Ec-00_004495	lncRNA	Unknown	NA		0	0	0	0	0	1.30166	0	0	0	0	0	0	0	0	1.41402	0	0	1.21845	0	4.92985	4.30804	1.27561	0	1.57547	1.20982	1.07211	2.64036	2.96555	1.90196	2.68174	2.69391	5.20965	4.48444	4.69638	3.0243	3.48116	1.24404	2.5568	3.0885	2.63008	2.03061	NA	NA	NA	NA
Ec-00_004500	hypothetical protein	Unknown	OG0000193		6.17389	5.462	3.02081	2.52327	2.61807	2.77832	3.5729	2.64517	0	1.21055	0	3.11363	2.46716	2.06591	3.27156	0	0	1.21845	1.16871	6.46749	6.21632	4.80731	5.35421	8.66173	8.43058	5.30698	5.6143	8.55603	9.72937	6.90378	6.77652	8.91608	8.71639	6.72513	8.03974	8.43744	5.48527	6.33578	6.93275	5.8278	6.72678	salmon	0.410421	0.880051	0.752945
Ec-00_004505	lncRNA	Unknown	NA		5.19374	5.462	0	2.18955	3.49551	2.43173	1.5762	1.85911	2.13694	0	0	0	0	0	2.73558	0	0	0	0	4.51559	3.50394	0	0	5.56094	6.10065	3.21238	4.20551	6.53252	6.11749	4.57985	4.54061	5.94036	5.34133	5.04654	5.57201	6.7379	4.42821	3.96828	3.79365	3.33394	2.84228	salmon	0.215578	0.919435	0.642302
Ec-00_004507	lncRNA	Unknown	NA		3.3074	0	0	1.75464	2.61807	0	0.993432	2.64517	0	0	0	1.10322	0.811408	0	2.87306	2.12208	0	0	1.16871	5.25132	5.08384	1.27561	0	7.81658	8.64451	4.80794	5.54859	9.21513	9.10459	7.11798	7.24635	8.0435	7.29969	6.03577	6.46774	8.40319	4.68003	6.30641	6.16535	5.76032	5.20948	salmon	0.499703	0.913091	0.69173
Ec-00_004510	Glycosyl transferase, family 31	Metabolism	OG0019576		0	0	3.25392	0	0	4.32529	6.79431	2.30503	3.86722	4.06791	2.81935	9.55019	9.11566	9.76793	10.1502	4.15105	4.41925	5.14979	4.3017	6.79853	8.56266	4.05581	4.57306	5.90086	6.43214	8.39064	7.14878	5.33463	4.12294	0.502471	4.94006	3.35068	2.44317	1.82521	0	0	0	2.0895	0	0	1.6122	darkred	0.249903	-0.244454	0.0626548
Ec-00_004520	Conserved unknown protein	Unknown	OG0000183		9.94964	9.95391	10.0282	9.7903	10.0424	10.0119	9.68902	9.98215	11.2218	11.5665	11.704	10.4763	10.7367	10.9473	10.3552	10.8867	10.8548	11.3238	10.9571	9.26304	9.53355	10.3722	10.4799	10.5175	10.6642	9.64938	8.84525	10.6108	10.553	11.2033	10.9172	9.4252	9.99806	9.5592	11.5855	10.237	8.07278	11.1865	11.8857	10.553	11.1693	grey	0.241187	-0.225923	-0.0570049
Ec-00_004530	Hypothetical protein	Unknown	OG0019577		0	0	0	0	0	0	0	0	0	0	0	0	0.462012	0	0	2.12208	0	0	0	0	0	0	0	0	0	0	0	0	0	0	0	0.485483	0	1.33694	0.808298	0	0	0	0	1.20016	2.03061	NA	NA	NA	NA
Ec-00_004540	expressed unknown protein	Unknown	OG0004361		7.68436	7.43724	2.74265	2.79411	4.43009	2.43173	1.99014	2.92022	2.96284	2.30532	3.09981	7.84487	7.62961	5.20374	5.41344	0	1.1857	2.3164	1.16871	5.85949	5.86705	3.01882	0	6.83135	6.96679	3.02968	3.14605	6.02964	6.64708	5.51034	5.84951	6.71444	7.85418	7.50052	6.84296	4.88105	2.97141	7.17257	5.95702	7.31573	6.56379	turquoise	0.350773	0.662218	0.9029
Ec-00_004550	Glucose/ribitol dehydrogenase	Metabolism	OG0004360		7.68436	7.24578	8.35908	8.6306	8.31252	8.97596	8.61258	8.41492	7.47339	7.63037	7.10134	6.81725	6.55816	6.23069	6.34416	7.23627	6.70395	6.40256	6.40298	6.23225	6.35537	6.9282	7.08658	7.59314	7.65282	6.99137	6.82162	7.4455	7.46092	6.51429	6.70807	6.54555	6.8579	6.65404	6.19939	7.31835	7.35635	6.21451	6.22861	6.15124	6.14861	brown	-0.847644	-0.29649	-0.502468
Ec-00_004560	Pentatricopeptide repeat	RNA modification or binding	OG0000744		8.32819	7.52421	10.2485	10.1781	10.0068	10.1925	10.4204	10.2327	10.2638	10.1336	10.7772	10.2026	9.72925	10.105	10.3056	10.6127	10.6226	10.6124	10.3321	10.166	10.1282	10.3753	10.2082	10.1519	9.83645	10.3635	10.6099	9.96467	10.5231	10.1012	10.2703	10.0078	9.91669	9.90831	9.63201	10.1415	10.137	9.91405	10.0015	10.1651	10.326	green	0.223724	-0.259281	-0.365898
Ec-00_004590	Riboflavin synthase, putative	Metabolism	OG0019579		4.79178	3.55699	8.12906	8.06035	8.13048	7.58095	7.08496	7.96192	6.7555	7.17247	7.46511	4.41191	3.66691	4.54281	4.7354	6.49855	6.20281	6.12933	5.98653	6.58648	6.21632	4.28341	3.63244	5.47791	4.62268	6.33863	6.29738	5.00131	6.01436	6.44699	6.54256	5.22516	5.39765	5.62433	4.06816	6.89405	7.74485	7.26709	6.9072	7.16734	7.3442	yellow	-0.397873	-0.0456873	-0.427622
Ec-00_004570	Riboflavin synthase, putative	Metabolism	OG0005558		8.96402	8.78971	9.11912	9.40199	9.31414	9.41423	9.57181	9.68104	8.71661	9.06936	8.71092	9.29019	9.46527	9.16456	9.48889	9.0026	9.20127	9.07259	9.24099	9.04661	8.95595	9.71808	9.63536	9.10384	9.1719	10.0317	10.2069	9.18918	8.98693	9.68333	9.77271	9.09665	9.20676	9.64145	9.24775	8.72773	9.48538	8.84068	8.6627	8.73685	8.57194	magenta	-0.0640557	-0.0940482	-0.140916
Ec-00_004580	hypothetical protein	Unknown	OG0019578		0	3.55699	0	1.75464	3.25783	3.29142	2.31141	1.21034	0	0	0	0	0	0	0	0	0	0	0	0	0	0	0	0	0	0	0	0	0	0	0	0.485483	0	0	0	0	0	0	1.05124	0	0	NA	NA	NA	NA
Ec-00_004600	Hypothetical protein	Unknown	OG0019580		5.19374	7.02497	7.10467	7.79325	7.94235	6.92054	6.60168	7.2979	5.55081	5.38343	6.23296	4.73585	4.69557	5.2648	4.78851	5.4045	5.58992	5.09483	4.20738	5.85949	5.19912	3.78545	3.83811	5.96324	5.33602	4.56079	5.20052	5.69226	5.83574	4.74586	5.01171	5.60308	5.3269	5.84467	5.22614	6.94255	6.75156	5.8164	5.55793	5.79446	6.79518	brown	-0.638045	0.0565782	-0.14377
Ec-00_004610	hypothetical protein	Unknown	OG0005560		5.50776	0	2.39774	2.79411	2.61807	4.77465	6.32685	4.54453	4.02612	4.06791	4.82084	6.21161	6.44396	6.01658	6.28379	6.53379	5.03863	6.20912	5.77264	6.82297	6.6537	6.25386	5.94971	6.38394	6.58795	6.92747	7.10373	6.78109	6.89118	6.77249	7.10608	6.82547	6.90723	7.03596	6.65681	5.80481	4.95927	6.01105	6.38487	6.97241	7.63292	brown	0.786623	0.40731	0.475514
Ec-00_004620	Arv1 protein	Membrane function and transporters	OG0005559		5.9841	5.462	7.04373	7.4457	7.48511	7.41747	7.60161	7.88382	7.50072	7.55171	7.26656	7.39794	7.12051	6.85464	6.82281	7.86721	7.11553	7.11898	7.42619	7.25891	7.25179	7.49223	7.42645	7.57827	7.51979	7.38307	7.55236	7.57711	7.5479	7.48975	7.80312	6.98433	7.14377	7.03596	7.51986	7.4416	7.56885	7.2206	7.26996	7.19316	7.25957	green	0.143686	-0.0605699	-0.264781
Ec-00_004630	ornithine transcarbamoylase	Metabolism	OG0001402		8.91166	8.98633	11.2024	11.5433	11.274	11.4763	12.0526	12.0662	10.1648	10.4587	11.3155	11.4458	11.5612	11.1358	11.4162	11.8161	11.4618	12.6096	12.1533	11.33	11.4737	11.6211	11.621	10.3712	10.7753	11.2024	11.5727	10.6406	10.3357	10.8546	11.0602	11.1725	10.9303	11.0344	10.1483	9.97077	11.3035	11.0635	10.9032	10.9493	10.4135	magenta	0.00719141	-0.486834	-0.425339
Ec-00_004640	RNA recognition motif domain	RNA modification or binding	OG0019581		9.88322	10.1983	10.2752	10.4894	10.4125	9.74007	9.88015	10.1517	9.26301	9.68832	8.88277	9.38492	9.25765	9.06935	9.28685	9.07016	9.52708	8.83755	9.12323	9.5405	9.36889	9.04492	9.02698	8.79634	8.86976	9.5856	9.76413	8.97807	8.94948	9.84891	10.0072	9.35202	9.41295	9.47713	9.63406	9.1557	9.13826	9.6028	9.6261	9.80588	9.75315	brown	-0.617774	-0.0214007	-0.0709044
Ec-00_004650	PIN domain	RNA modification or binding	OG0004955		12.6657	12.609	7.66606	7.8975	8.28901	7.71777	8.04217	7.60101	6.61252	7.48976	7.20864	8.73431	9.01083	8.25059	8.72289	8.71477	8.83315	8.82916	8.53795	9.02043	8.75707	8.48249	8.45386	7.23059	7.46723	9.11779	9.49169	7.5128	7.4553	9.0285	9.27513	8.74638	8.87977	8.55234	8.2394	7.70325	7.28218	8.0921	8.53506	8.54969	8.22541	green	-0.0753885	0.132551	0.272692
Ec-00_004670	conserved unknown protein	Unknown	OG0004956		8.47974	8.3874	9.30913	9.18669	9.58261	9.367	9.17668	9.35898	10.1627	10.2156	9.96233	9.80663	9.77409	9.84369	10.0309	10.1291	9.92154	10.0334	9.98472	10.0761	9.79106	9.32295	9.20939	10.1561	10.2334	9.9648	9.5533	10.3714	10.4382	10.0033	10.0077	9.8353	9.92029	10.2147	10.1368	10.921	9.16602	10.0708	10.3282	10.6164	10.8088	brown	0.634534	0.346287	0.319568
Ec-00_004680	Hypothetical protein	Unknown	OG0019582		0	0	4.65508	4.93924	5.75771	7.9492	8.5299	7.2736	8.82868	8.94408	9.36269	5.79063	5.61287	7.76101	6.99462	6.94056	6.72149	7.32405	6.75938	3.63368	4.00421	6.08294	6.37	5.16935	5.59309	1.68033	1.45678	2.96555	4.06514	0.874424	0	0	0	2.01874	1.08863	2.82785	0	0	0	1.20016	1.02048	lightyellow	-0.328412	-0.807762	-0.659294
Ec-00_004690	conserved unknown protein	Unknown	OG0019583		4.23263	4.49436	4.94899	5.14686	5.56234	7.98301	8.15179	7.5412	7.37345	7.82688	8.22582	6.29133	6.58109	5.53651	5.99839	5.93917	5.03863	5.35081	4.62726	3.83937	4.23787	4.05581	4.45303	7.57827	7.38462	4.75001	4.64346	7.57138	7.92625	5.64856	5.28184	6.68108	6.55773	5.25309	5.0896	6.49935	3.5788	4.75745	5.38362	4.52733	5.466	grey	-0.131057	-0.0912432	-0.119425
Ec-00_004700	expressed unknown protein	Unknown	OG0019584		3.3074	3.55699	3.02081	4.13922	3.49551	7.05378	3.15823	3.35014	6.66177	6.92969	8.01393	6.07902	5.33113	5.32339	6.13453	0	0	1.86945	1.16871	1.53706	0	0	1.53617	7.15242	6.77255	1.07211	0.904947	6.4967	6.69551	2.58488	1.90123	6.20574	5.61514	5.93141	5.22614	3.19117	2.69475	2.9092	0	1.20016	0	black	-0.0952869	0.0499182	0.126699
Ec-00_004720	Hypothetical protein	Unknown	OG0019585		0	0	1.27694	1.75464	2.97312	1.30166	2.31141	1.21034	0	0	0	0	0	0	0	0	0	0	0	0	0.95637	0	0	0	0	0	0	0	0	0	0	0	0	0	0	0	0	0	2.07619	0	0	NA	NA	NA	NA
Ec-00_004740	hypothetical protein	Unknown	OG0000288		5.50776	5.05783	1.94355	2.52327	2.97312	4.69528	5.27258	5.18887	3.24728	3.15146	0	0.820122	2.13657	3.40067	2.50116	1.69398	1.8276	0	0	4.68517	4.43891	0	0	5.00113	3.34931	7.11126	9.32899	5.035	4.55961	6.32483	7.44059	6.82547	4.94757	3.27025	3.42826	6.1733	4.60088	3.80983	5.05177	5.72537	4.79407	salmon	0.105784	0.730938	0.441344
Ec-00_004745	lncRNA	Unknown	NA		3.3074	0	1.94355	1.75464	2.14606	0	0	2.30503	0	1.21055	0	3.04837	3.03065	2.06591	1.87328	1.69398	0	0	0	2.52483	3.3791	0	0	5.54063	5.74211	3.52027	3.57361	5.16241	4.86078	4.72328	4.21601	4.7972	4.88984	4.95486	3.96784	5.15249	1.24404	4.24093	4.26522	2.63008	1.02048	turquoise	0.403565	0.787111	0.740276
Ec-00_004750	expressed unknown protein	Unknown	OG0019586		7.86043	7.68385	5.99148	5.79732	5.20847	5.70818	6.27241	5.5542	6.1772	5.94148	5.43992	6.1351	6.01772	5.2944	5.90529	6.20267	7.03368	5.79196	5.86821	6.3378	6.08257	6.02115	6.52688	5.78473	6.18117	6.76147	6.53988	6.40948	6.40062	6.97718	6.94154	5.93093	5.46509	6.76616	4.73004	6.56279	7.40376	6.27642	6.20783	6.15124	6.48315	grey	0.0377423	0.295399	0.103608
Ec-00_004760	PC-Esterase	Metabolism	OG0000151		6.34159	6.90045	5.74578	4.76121	4.43009	6.77373	6.47883	5.5542	7.97025	7.27397	7.67212	8.903	8.60933	9.84993	9.03271	7.83932	7.91842	7.65371	8.49866	7.30302	7.83657	8.70021	8.74333	10.1197	10.3912	7.25876	7.24734	10.7294	10.6967	10.3211	10.0434	9.58027	9.53174	9.97837	10.4651	9.17613	6.71443	10.2259	10.4349	9.56021	9.08225	brown	0.844759	0.506687	0.629784
Ec-00_004770	Hypothetical protein	Unknown	OG0019587		0	0	0	1.12909	0	2.77832	0.993432	0	1.4325	3.35047	4.01311	3.84772	2.81545	2.53119	3.62299	3.46723	2.60856	3.36299	2.8561	2.52483	2.25147	3.62854	3.1045	4.33221	3.15032	3.58797	2.53571	4.78074	5.05147	5.66049	5.29626	4.01811	3.75575	3.72347	4.73004	5.06756	1.90196	3.6318	5.55793	3.66436	4.36059	brown	0.796729	0.449351	0.425401
Ec-00_004780	Hypothetical protein	Unknown	OG0019588		0	0	2.39774	1.12909	0	3.05756	1.5762	0	0	0	0	0	0	0	0	2.45179	3.78108	1.21845	3.28344	3.25687	0.95637	0	0	0	0	0	0	0	0	0	0	0	0	0	0	5.51521	2.35214	4.11103	5.8803	4.35508	4.62396	black	0.113831	0.108071	0.00289257
Ec-00_004790	Hypothetical protein	Unknown	OG0019589		0	0	2.74265	1.12909	2.14606	3.49261	1.99014	0	0	0	0	0	0	0	0	2.12208	4.13517	1.21845	3.28344	2.74547	1.93405	0	0	0	0	0.633432	1.20709	0	0	0	0.475874	0	0	0	0	4.54642	1.24404	4.24093	5.71344	4.26057	5.43203	black	0.0268785	0.0709012	-0.0217829
Ec-00_004800	Hypothetical protein	Unknown	OG0019590		0	0	2.39774	3.02206	0	3.66915	3.68829	1.85911	0	0	0	0	0	0.845388	0	2.94606	2.27029	3.96316	3.99795	3.3937	3.24242	0	0	0	1.20982	0	0	1.70947	0	0	0	0	0	0	0	5.51521	3.87637	5.26469	6.40326	4.82022	4.56249	black	0.0322179	0.0834194	-0.0613441
Ec-00_004810	Glycosyltransferase AER61, uncharacterised	Metabolism	OG0019591		9.92344	10.1306	7.36347	7.00036	6.89728	6.56633	5.89395	6.4974	4.41885	4.37253	3.33452	1.87949	3.0958	2.88244	3.05746	4.40049	4.41925	4.08096	4.20738	6.43614	5.66796	0	0	6.20186	5.18798	7.38783	8.73878	6.64589	5.63185	6.45386	6.99997	7.03802	7.12721	4.97833	5.71296	7.49136	5.44051	4.84177	6.34736	6.72942	5.92263	pink	-0.32254	0.578671	0.243818
Ec-00_004820	Hypothetical protein	Unknown	OG0019592		4.23263	3.55699	1.94355	2.79411	2.61807	4.52212	4.07508	2.64517	5.83471	5.77833	4.56798	5.26724	5.64588	6.95069	5.55299	5.20036	4.02652	5.03769	5.44081	3.74019	4.23787	6.08294	6.23092	6.56583	7.17775	3.52027	2.42287	7.40741	7.23709	6.24783	6.29224	5.71719	5.89495	6.21441	7.24774	4.66679	2.69475	5.49044	5.62216	4.15943	3.73802	brown	0.60599	0.193254	0.366551
Ec-00_004830	expressed unknown protein	Unknown	OG0019593		0	0	1.94355	1.12909	0	0	0	0	1.4325	1.21055	0	0.467569	0.462012	0	0.736313	1.69398	0	0	0	0	0	1.27561	0	3.04635	2.3043	0	0	2.81853	2.35214	0	0	0.848085	0	0.59332	0	0	0	0	1.65288	0	0	NA	NA	NA	NA
Ec-00_004840	exonuclease I Exo1	DNA or chromatin modification	OG0000039		0	0	0	1.12909	0	0	0	0	0	0	0	0	0	0	0	0	0	0	0	0	0	0	0	0	0	0	0	0	0	0	0	0	0	0	0	0	0	0	0	0	0	NA	NA	NA	NA
Ec-00_004850	Ankyrin-repeat protein	Membrane function and transporters	OG0019594		0	0	0	0	0	0	0	0	0	0	0	0	0	0	0	0	0	0	0	0	0	0	0	0	0	0	0	0	0	0	0	0	0	0	0	0	0	0	0	0	0	NA	NA	NA	NA
Ec-00_004860	Hypothetical protein	Unknown	OG0019595		0	0	2.39774	0	0	1.30166	7.0093	0	2.6082	3.15146	0	10.565	10.326	10.4414	10.8838	4.61309	2.88239	4.85131	4.69834	7.60738	9.90865	4.28341	5.13768	6.84798	7.86677	9.32543	8.073	6.02964	5.05147	1.41498	6.13267	4.1212	2.81809	1.01252	1.525	0	1.24404	1.39397	1.65288	1.84612	2.35455	darkred	0.395638	-0.0522671	0.263504
Ec-00_004870	hypothetical protein	Unknown	OG0019596		0	0	0	0	0	1.30166	0	0	0	0	0	0	0	0	0.736313	0	0	0	0	0	0	0	0	0.731276	0	1.07211	0	0	0	0	0	0	0	0	0	0	0	0	0	0	0	NA	NA	NA	NA
Ec-00_004885	lncRNA	Unknown	NA		0	0	0	0	0	0	0	0	0	0	0	0	0	0	0	0	0	0	0	0	0	0	0	0	0	0	0	0	0	0	0	0	0	0	0	0	0	0	0	0	0	NA	NA	NA	NA
Ec-00_004887	lncRNA	Unknown	NA		0	0	1.94355	0	0	3.05756	5.34471	1.21034	0	1.21055	0	7.7377	7.57925	8.08267	7.99084	2.71999	1.1857	1.21845	2.2462	4.17937	6.38814	0	1.53617	3.82804	4.17554	6.34842	5.71359	2.25822	1.90196	0.874424	3.7965	2.20179	0.853573	0.59332	0	0	1.24404	0	0	2.90463	2.61893	darkred	0.249518	-0.0558202	0.294668
Ec-00_004890	Winged helix-turn-helix DNA-binding domain	Transcription	OG0019597	TAP	0	0	1.27694	0	0	0	1.99014	0	0	0	0	2.57921	2.65179	2.31723	3.87295	0	0	0	0	0	1.93405	0	0	1.57547	2.78846	1.90929	0.904947	0.812953	1.90196	0	0	0	0	0	0.460032	0	0	0	0	0	0	NA	NA	NA	NA
Ec-00_004900	conserved unknown protein	Unknown	OG0019598		0	0	0	0	1.43994	1.30166	1.5762	0	0	0	0	2.90828	2.73594	2.06591	3.45795	0	0	0	0	1.53706	2.73173	0	1.53617	0.731276	2.3043	3.52027	0.904947	1.32976	0	0	1.11921	0	1.14434	1.01252	0	0	0	1.39397	0	0	0	NA	NA	NA	NA
Ec-00_004910	hypothetical protein	Unknown	OG0000003		6.34159	5.462	3.02081	4.13922	3.49551	4.32529	3.98766	3.94983	5.38472	5.38343	5.43992	4.75643	4.8546	4.7277	5.95259	6.18061	5.98782	6.07357	5.83705	8.1757	7.69315	3.62854	4.88282	8.4411	8.31041	8.02896	8.30958	7.94814	8.52541	8.53356	8.37153	9.49165	8.99149	8.33091	8.26781	9.95607	8.68982	7.67596	8.46236	7.58312	7.75472	salmon	0.700945	0.901421	0.624447
Ec-00_004920	PIN domain-like	RNA modification or binding	OG0000039		4.23263	5.77737	0	1.12909	2.14606	3.05756	2.574	1.21034	1.4325	1.21055	1.33033	0	0	0	2.11422	0	1.1857	0	1.16871	5.6838	4.91423	0	0	4.87699	5.23904	3.83087	5.20052	4.31615	5.08094	4.93458	4.30426	6.70341	6.28662	5.4838	5.39017	6.21338	5.29722	4.92144	5.00436	4.44377	4.68292	salmon	0.347043	0.945792	0.644802
Ec-00_004940	hypothetical protein	Unknown	OG0019599		5.19374	5.77737	1.94355	2.18955	2.97312	4.32529	4.74221	2.92022	2.96284	3.82197	2.81935	0.820122	1.09247	0	4.27147	1.08252	0	1.86945	1.80579	6.74837	6.21632	1.27561	1.53617	7.60297	6.94389	5.04319	6.25681	7.30066	7.60986	6.30216	5.91637	8.05873	7.57469	6.63939	7.12501	8.62745	6.40062	6.73904	7.2293	5.86039	6.28807	salmon	0.340457	0.9414	0.609305
Ec-00_004950	expressed unknown protein	Unknown	OG0019600		0	0	1.27694	3.02206	2.14606	5.17645	4.30942	4.1764	0	0	0	0	0	0	0	0	0	0	1.16871	5.13899	4.23787	0	0	0	0	0	0	0	1.24404	0	0	0	0	0	0.460032	6.36344	4.75507	4.92144	5.8803	4.82022	5.24904	black	-0.0988574	0.21215	0.0674318
Ec-00_004960	Hypothetical protein	Unknown	OG0019601		0	3.55699	2.39774	3.02206	2.61807	5.70818	4.30942	4.27761	0	2.30532	2.0105	0.467569	1.3276	0	2.50116	1.08252	0	1.86945	1.80579	5.25132	4.91423	0	0	5.96324	5.21374	4.26238	5.21753	6.04625	5.98348	4.70034	4.65691	6.52062	5.84519	5.54795	5.67104	6.7379	5.69037	5.13701	5.62216	4.75238	5.16881	salmon	0.244323	0.831189	0.50164
Ec-00_004970	hypothetical protein	Unknown	OG0019602		0	0	0	0	1.43994	3.05756	1.5762	0	0	0	0	0	0	0	0	0	0	0	0	1.94599	2.51149	0	0	0	0	0	0	0	0	0	0	0	0	0	0	3.19117	0	1.39397	0	1.84612	0	NA	NA	NA	NA
Ec-00_004980	expressed unknown protein	Unknown	OG0019603		0	0	0	0	0	1.97463	2.31141	0	2.13694	2.30532	1.33033	1.10322	0.811408	1.3749	2.32062	1.08252	0	1.86945	1.16871	0	0.95637	1.27561	0	5.11543	5.65079	2.10685	0	2.00978	1.24404	0.874424	0	0	0	0.59332	0	0	0	0	1.05124	0	0	purple	0.0928112	-0.0162802	-0.0197746
Ec-00_004985	lncRNA	Unknown	NA		0	0	0	0	0	0	0	0	0	0	0	0.820122	1.09247	1.76139	1.73582	0	0	0	0	0.964221	1.93405	0	0	1.86411	0	2.70321	0	0	0	0	0	0	0	0	0	0	0	0	0	0	0	NA	NA	NA	NA
Ec-00_004990	Hypothetical protein	Unknown	NA		0	3.55699	0	0	1.43994	0	0	0	0	0	0	0	0	0	0	0	0	0	0	0	0.95637	0	0	0	0	0	0	0	0	0	0	0	0	0	0	0	0	0	0	0	0	NA	NA	NA	NA
Ec-00_004995	lncRNA	Unknown	NA		4.23263	0	0	0	1.43994	0	0	0	0	0	0	1.10322	0.462012	2.06591	2.32062	0	0	1.21845	0	0	0.95637	0	0	0.731276	0	3.58797	0.522295	0.812953	0	0	0.475874	0	0	0	0	0	0	0	0	0	0	NA	NA	NA	NA
Ec-00_005000	conserved unknown protein	Unknown	OG0000121		4.23263	3.55699	3.45454	3.81345	3.49551	5.05454	2.574	2.92022	3.24728	4.83791	5.10103	3.99352	4.00885	4.5913	2.93718	1.08252	0	1.86945	2.58314	0.964221	1.52649	0	3.1045	4.77633	4.27674	2.70321	2.16669	3.79345	4.00492	1.96955	1.35786	3.828	3.712	3.19211	3.82222	2.82785	0	1.39397	0	0	0	NA	NA	NA	NA
Ec-00_005010	Hypothetical protein	Unknown	OG0019604		0	0	0	0	0	0	0.993432	0	0	0	0	0	0	0	0.736313	1.08252	0	1.21845	1.16871	2.74547	5.30587	0	0	0	0	0	0	0.812953	0	0	0	0	0	1.01252	0	0	1.90196	0	0	0	1.02048	NA	NA	NA	NA
Ec-00_005020	Hypothetical protein	Unknown	OG0019605		0	0	1.94355	0	0	3.49261	6.00941	1.85911	2.13694	1.21055	1.33033	8.49357	8.13869	9.45561	9.80411	4.9625	3.11244	3.69406	3.8806	6.9168	8.86866	4.56901	4.45303	6.75405	7.48849	9.42481	8.02064	5.51259	5.70936	3.08738	5.94411	6.14994	5.46509	5.76593	4.30587	0	1.24404	3.1922	2.07619	2.29071	0	darkred	0.486503	0.0986575	0.372538
Ec-00_005025	lncRNA	Unknown	NA		0	0	1.94355	0	0	4.09731	4.30942	1.21034	2.6082	0	0	7.66337	7.16293	8.57383	9.29682	4.54564	2.88239	4.71217	4.83078	6.58648	8.45078	4.87873	4.68387	7.24322	8.27415	9.24906	7.3279	5.8137	5.46307	1.41498	4.86467	5.25569	4.58488	5.38188	3.52557	2.82785	1.90196	3.6318	2.07619	2.90463	2.35455	darkred	0.535291	0.161848	0.409857
Ec-00_005030	expressed unknown protein	Unknown	OG0000331		12.2255	11.909	9.13746	9.59152	8.50168	8.91158	7.71482	7.47881	10.3433	10.4614	10.674	8.27922	7.90876	8.50273	8.22719	8.43621	7.14181	8.44569	8.1827	6.2683	7.37133	8.78165	8.88923	7.96878	8.09868	7.16766	5.8288	7.26561	7.28218	5.08383	5.17666	7.35599	7.40648	7.8828	6.871	6.62355	7.16324	3.1922	2.40305	3.50859	3.03565	blue	-0.560968	-0.497681	-0.454054
Ec-00_005040	expressed unknown protein	Unknown	OG0019606		9.96257	10.1983	8.0615	8.15352	7.76055	7.14621	7.04222	7.2858	7.54076	7.71402	7.41478	7.38809	6.99378	7.83335	8.43022	8.4955	7.95593	6.68897	6.70864	8.08261	7.89473	8.36926	8.50758	6.50422	6.56812	8.0886	7.16203	6.56748	6.01436	6.21584	6.68634	7.92025	7.58685	6.95546	6.90305	8.49549	6.89117	0	0	3.80494	2.84228	blue	-0.393964	-0.314467	-0.302333
Ec-00_005050	expressed unknown protein	Unknown	OG0019607		0	0	0	0	0	0	0	0	0	0	0	0	0	0	0	0	0	0	0	0	0	0	0	0	0	0	0	0	0	0	0	0	0	0	0	0	0	0	0	0	0	NA	NA	NA	NA
Ec-00_005060	3'-5' exonuclease domain	DNA or chromatin modification	OG0019608		0	0	0	0	0	0	0	0	0	0	0	0	0	0	0	0	0	0	0	0	0	0	0	0	0	0	0	0	0	0	0	0	0	1.33694	0	0	0	0	0	0	1.02048	NA	NA	NA	NA
Ec-00_005070	Hypothetical protein	Unknown	NA		0	0	0	0	0	0	0	0	0	0	0	0	0	0	0	0	0	0	0	0	0	0	0	0	0	0	0	0	1.61018	0	0	0	0	0	0	0	0	0	0	0	0	NA	NA	NA	NA
Ec-00_005080	Hypothetical protein	Unknown	NA		0	0	0	0	0	0	0	0	0	0	0	0	0	0	0	0	0	0	0	0	0	0	0	0	0	0	0	0	0	0	0	0	0	0	0	0	0	0	0	0	0	NA	NA	NA	NA
Ec-00_005090	conserved unknown protein	Unknown	OG0000292		0	0	0	0	0	0	0	0	0	0	0	0	2.13657	0	0.736313	1.08252	0	0	0	1.94599	0.95637	1.94186	1.53617	0	0	0	0	0	0	0	0	0	0	0	0	0	0	0	0	0	0	NA	NA	NA	NA
Ec-00_005100	Hypothetical protein	Unknown	NA		0	0	0	0	0	0	0	0	0	0	0	0	0	0	0	0	0	0	0	0	0	0	0	0	0	0	0	0	0	0	0	0	0	0	0	0	0	0	0	0	0	NA	NA	NA	NA
Ec-00_005115	lncRNA	Unknown	NA		7.16386	7.02497	3.63064	4.76121	4.18038	7.76712	6.37931	2.30503	3.86722	3.68126	5.16334	5.22357	4.33989	5.07325	5.07167	2.71999	2.60856	5.75698	5.52142	6.70957	6.4822	3.92695	3.39248	8.14734	8.35738	6.10442	6.27317	8.48162	8.1582	6.46751	6.54256	7.18011	6.76461	6.70417	6.19939	8.00678	6.63719	6.14983	5.90633	5.72537	6.18985	salmon	0.290067	0.796483	0.597867
Ec-00_005120	expressed unknown protein	Unknown	OG0019609		0	0	0	0	0	0	0.993432	0	0	0	0	0	0	0	0.736313	0	0	0	0	1.53706	0	1.27561	0	1.57547	1.57029	0.633432	1.20709	2.25822	0	0	0	0.485483	0	0.59332	0.460032	1.60093	0	1.39397	0	1.20016	1.6122	NA	NA	NA	NA
Ec-00_005130	PIN domain-like	RNA modification or binding	OG0000039		0	0	0	0	0	0	0	0	0	0	0	0	0	0	0	0	0	0	0	0.964221	0	0	0	0.731276	0	0	0	0	1.24404	0	0	0	0	0	0	3.19117	2.35214	0	0	0	0	NA	NA	NA	NA
Ec-00_005140	Hypothetical protein	Unknown	OG0019610		11.1202	11.1911	9.0472	8.97155	8.93437	8.82101	8.1767	8.3525	8.21262	7.91593	7.25229	7.86159	7.93792	8.10789	7.80358	8.01791	7.47726	7.97611	7.78572	7.3709	7.51918	8.02815	8.44602	8.74843	9.1719	7.22194	6.67535	9.24423	9.17459	6.36914	6.7662	8.06089	7.97247	8.18975	7.97661	9.10865	8.53342	7.38419	6.8547	7.76625	8.05732	blue	-0.539754	-0.00533059	0.0190472
Ec-00_005150	Ankyrin-repeat protein	Membrane function and transporters	OG0002439		11.0969	10.9295	9.39703	9.35569	9.55659	9.32147	8.82921	9.16128	8.26934	8.61226	8.04735	8.26134	8.45495	8.35257	8.31729	8.61136	8.62997	8.55662	8.36305	8.75106	8.50033	7.8171	8.09135	8.08557	7.82561	8.79508	8.5367	8.2502	8.24537	8.59391	8.58769	8.88589	8.86736	9.02206	8.69132	8.8344	9.37374	8.29267	8.16105	8.60843	8.58746	red	-0.610204	0.0713811	-0.0232497
Ec-00_005160	Hypothetical protein	Unknown	OG0019611		3.3074	0	3.45454	2.18955	1.43994	4.98949	3.15823	2.30503	3.68863	1.85938	4.14247	4.06125	3.90362	4.49263	4.50094	4.67752	2.88239	4.29112	3.99795	3.83937	3.82435	3.78545	4.01809	4.77633	5.10785	3.37452	1.66957	4.47187	4.06514	1.62442	2.40555	3.40617	2.73309	4.45004	4.16195	4.88105	1.24404	1.39397	3.9011	2.63008	2.61893	NA	NA	NA	NA
Ec-00_005170	Zinc finger, RING/FYVE/PHD-type	Transcription	OG0019612		3.3074	3.55699	5.78355	3.93041	4.43009	6.0646	5.51068	4.27761	5.7911	5.59435	6.01376	6.07902	5.79063	5.78604	6.04279	6.85956	5.29433	6.67029	6.77591	5.6838	5.93515	5.19082	5.05763	5.93239	5.74211	6.28864	5.36226	5.46394	5.999	5.18643	5.28184	5.63827	5.31232	6.15386	5.90605	6.79185	4.42821	5.06867	5.68365	5.57639	6.04004	green	0.504667	-0.0135438	0.0274033
Ec-00_005180	Zinc finger, RING/FYVE/PHD-type	Cellular regulation and signalling	OG0019613		6.17389	6.25526	1.94355	2.18955	2.97312	0	0.993432	2.30503	0	0	0	7.7608	8.03246	7.55028	8.16997	3.14146	3.11244	2.3164	4.39023	8.49758	8.19707	3.78545	4.01809	8.6236	7.73069	7.61576	6.79919	7.06005	8.09462	7.44215	7.54389	7.68249	8.38317	7.87344	8.42741	7.97216	5.34658	7.2206	8.07187	8.89857	8.87347	turquoise	0.664667	0.747079	0.939528
Ec-00_005190	Hypothetical protein	Unknown	OG0019614		7.4102	7.34468	7.62504	7.96074	7.39988	8.88052	8.69423	8.1671	9.56438	8.53769	8.16622	9.57792	9.70792	10.3163	9.69011	8.66399	8.31474	8.96561	9.7726	9.86425	9.97351	9.46895	9.57553	10.2388	10.7197	9.56265	9.22135	11.0885	10.6471	10.4139	10.2543	10.7902	10.3301	10.4606	10.2003	11.0947	9.92383	10.2589	10.3366	10.062	9.43507	brown	0.8225	0.60463	0.592044
Ec-00_005200	Nck-associated protein 1	Cytoskeleton and flagella	OG0008650		9.01454	9.07542	8.71231	8.69401	8.79109	9.00916	9.24895	9.2758	9.9854	10.0645	9.92461	9.53687	9.66496	9.84619	9.74768	9.88321	9.72694	10.3011	10.2531	9.86572	9.87292	9.45733	9.57912	9.18951	9.01231	8.84782	9.13555	9.23157	9.14176	9.27544	9.33135	9.71479	9.83491	9.49758	9.82058	9.81013	9.23973	9.85947	10.3331	10.1667	10.4168	greenyellow	0.606776	-0.0515869	0.0770278
Ec-00_005210	Pentatricopeptide repeat	RNA modification or binding	OG0009147		11.503	11.2998	10.1048	10.4223	10.1957	10.1889	9.90869	10.155	10.0283	10.1046	9.31202	8.74979	8.32852	8.48999	8.61553	9.69759	9.61414	9.19849	9.18331	8.9192	8.98301	8.86755	8.69123	9.30392	8.99199	9.25428	9.39124	8.88875	9.32378	9.0727	8.9926	8.35863	8.46616	8.49246	8.02733	9.22597	9.88468	9.05012	8.92705	9.22381	9.54245	red	-0.789098	-0.218409	-0.451316
Ec-00_005220	Small GTPase superfamily, Ras type	Cellular regulation and signalling	OG0009145		9.54801	9.38525	9.68337	9.70873	9.6972	9.16825	9.11614	9.43215	9.62772	9.90355	10.0901	8.78777	8.94053	8.83019	8.76324	8.64397	9.16969	8.26458	8.68081	9.65554	9.47755	7.50357	7.20279	9.53586	9.18335	8.46229	8.53161	9.2532	10.002	8.80349	8.77565	9.91159	10.0869	9.12423	9.16616	9.26464	9.77853	9.59371	9.83362	9.83076	10.434	grey	-0.141803	0.371045	0.234293
Ec-00_005230	Nitroreductase	Metabolism	OG0008861		8.44332	7.95827	7.1774	7.47488	7.60421	7.31501	7.47072	7.43566	7.04258	6.9906	7.16363	7.83764	7.79321	7.85337	7.99084	7.54337	7.63361	7.91397	7.64887	7.72228	7.5913	7.79881	7.90947	7.09784	7.4779	7.80546	8.25912	7.51877	7.33817	8.10843	8.15524	7.57763	7.79513	7.87969	7.76125	6.98948	7.24361	7.75419	7.90118	7.58312	7.30719	yellow	0.214047	0.124927	0.334387
Ec-00_005240	WD40 repeat	Protein binding or modification	OG0008862		4.23263	5.05783	8.52434	8.39143	8.48108	8.5827	8.47471	9.03326	7.60513	8.45905	8.26896	6.90742	6.85485	6.40358	6.9409	8.52644	8.3205	8.52059	8.03262	7.84073	7.87175	6.84147	6.30213	6.72733	6.45391	8.64622	8.75781	6.31665	6.54505	7.86202	8.0443	7.09823	6.70449	6.72513	6.32635	7.93668	8.33981	6.92448	7.25991	7.53346	7.58735	yellow	-0.220097	-0.286421	-0.580582
Ec-00_005250	Hypothetical protein	Unknown	OG0000139		0	0	3.92908	0	1.43994	6.12642	9.14673	2.64517	4.90137	4.83791	3.53633	12.0438	11.8983	12.3768	12.5289	6.42539	5.62761	7.04842	6.82438	9.79335	11.5316	6.89413	7.16509	8.94093	10.178	11.5081	9.93973	8.22487	7.34425	1.16987	7.91713	4.85817	3.04662	2.01874	0.808298	0	0	0	1.65288	3.50859	2.61893	darkred	0.281242	-0.1978	0.0917882
Ec-00_005260	expressed unknown protein	Unknown	OG0000229		0	0	0	0	0	0	0	0	0	0	0	0	0	0	0	0	0	0	0	0	0	0	0	0	0	0	0	0	0	0	0	0	0	0	0	0	0	0	0	0	0	NA	NA	NA	NA
Ec-00_005270	hypothetical protein	Unknown	OG0019615		0	0	0	0	0	0	0	0	0	0	0	0	0	0	0	0	0	0	0	0	0.95637	0	0	0	0	0	0	0	0	0	0	0	0	0	0	0	0	0	0	1.20016	0	NA	NA	NA	NA
Ec-00_005275	lncRNA	Unknown	NA		0	0	0	0	0	0	0	0	0	0	0	1.10322	0.462012	0.845388	0.999185	0	0	0	0	0	0	0	0	0	0.728178	1.68033	0	0	0	0	0	0	0	1.01252	0	0	0	0	0	0	0	NA	NA	NA	NA
Ec-00_005280	expressed unknown protein	Unknown	OG0000087		0	0	0	0	0	1.30166	0	0	1.4325	0	1.33033	0	0	0	0.41463	0	1.1857	0	0	0.964221	0.95637	0	0	3.75937	4.41636	0	0.522295	3.33366	3.80753	0.502471	0	1.13761	1.14434	2.01874	1.08863	2.34107	2.35214	2.5568	2.07619	1.20016	0	NA	NA	NA	NA
Ec-00_005285	lncRNA	Unknown	NA		10.1994	10.0302	6.89639	7.19994	7.10902	8.03228	7.90575	6.84939	7.41713	7.0774	10.5424	3.45315	2.73594	0.845388	8.23199	5.4045	5.29433	7.22516	7.51746	11.866	11.4369	4.65289	5.48238	12.502	12.5578	12.3888	12.4146	12.4323	12.7074	11.9999	11.9445	12.308	11.7903	11.8527	11.3598	13.2405	12.5126	11.0189	10.5353	10.8524	9.19542	salmon	0.27508	0.882341	0.409412
Ec-00_005290	Hypothetical protein	Unknown	OG0019616		0	0	0	0	0	0	0.993432	0	0	0	0	0	0	0	0	0	0	0	0	4.32338	2.51149	0	0	0	0	0	0	0	0	0	0	0	0	0	0	5.90613	3.5788	3.1922	4.41777	2.63008	2.35455	black	0.276066	0.409522	0.255958
Ec-00_005300	Hypothetical protein	Unknown	NA		0	0	1.27694	0	0	0	0	0	0	1.21055	1.33033	0	0	0	1.22146	0	0	0	0	1.94599	1.93405	0	0	3.26023	3.8863	2.28059	1.85496	2.25822	3.65914	1.62442	2.04477	4.18605	3.41733	3.02184	4.00206	5.80481	2.69475	3.42868	3.25979	3.33394	2.61893	salmon	0.532761	0.840683	0.604071
Ec-00_005310	Hypothetical protein	Unknown	OG0019617		10.6059	10.6097	0	5.45087	5.50907	4.84987	3.15823	4.37218	6.39674	6.27103	5.10103	4.15722	3.33043	0.845388	7.6965	3.73282	2.60856	5.56814	6.06931	11.2501	10.7956	0	0	11.9362	12.0165	10.8779	11.4464	12.0348	12.1463	11.5473	11.3516	12.29	12.1419	11.7147	12.1186	12.158	11.7711	11.6929	11.9571	11.4659	10.9271	salmon	0.438021	0.958543	0.662983
Ec-00_005320	hypothetical protein	Unknown	OG0019618		0	3.55699	0	0	0	1.30166	0	0	3.24728	3.82197	2.47088	2.15218	2.36515	2.53119	3.36776	1.08252	3.11244	0	0	2.52483	0	1.94186	2.26318	5.3669	4.86945	2.57562	2.91525	7.17029	6.27876	4.10843	3.75535	5.24051	4.7454	6.05797	4.00206	1.60093	0	5.93631	4.95534	3.66436	3.03565	turquoise	0.580941	0.561768	0.580915
Ec-00_005325	lncRNA	Unknown	NA		7.91465	7.68385	10.4005	10.7943	10.8286	10.3286	9.51433	9.81965	9.18093	9.97876	8.73162	7.40121	6.04272	6.77291	7.2336	9.40826	9.04989	9.30523	9.00904	8.1421	7.99386	7.98024	8.25285	7.46425	7.32088	8.13178	7.15762	7.39449	7.64481	7.02412	6.56655	6.4629	5.83503	8.3802	7.87178	10.1232	9.46597	8.30014	7.86845	7.71371	7.41547	turquoise	-0.691492	-0.452286	-0.730816
Ec-00_005327	lncRNA	Unknown	NA		8.11318	8.71772	9.03159	9.06725	8.35088	8.44998	7.97557	8.0857	8.66922	9.38509	9.43708	9.93685	8.41402	9.55523	9.81108	10.5048	10.1954	11.2088	10.6978	9.57148	9.31239	9.87695	10.0645	8.82392	8.86164	10.2314	9.4455	8.56182	8.52808	8.77633	8.74181	8.37437	7.72257	10.6652	10.3051	11.2032	10.1158	9.19741	8.76581	8.84258	7.80867	grey	0.297888	-0.161923	-0.22342
Ec-00_005330	hypothetical protein	Unknown	OG0019619		0	0	0	0	0	0	0	0	0	0	0	6.73669	6.21388	7.58661	8.60447	2.45179	0	1.21845	1.80579	3.83937	6.49729	2.39589	2.26318	2.9262	4.41636	5.47732	3.98478	1.70947	1.61018	0	1.74182	2.63243	1.93523	1.01252	0	0	0	0	0	0	0	darkred	0.376511	-0.0352432	0.363202
Ec-00_005340	Hypothetical protein	Unknown	NA		0	0	0	0	0	0	0	0	0	0	0	0	0	0	0	0	0	0	0	0	0	0	0	0.731276	0	0	0	0	0.752151	0	0	0	0	0	0	0	0	0	0	0	0	NA	NA	NA	NA
Ec-00_005350	Hypothetical protein	Unknown	NA		0	0	1.27694	1.12909	2.14606	1.30166	0	0	0	0	0	0	0	0	0	0	1.1857	0	0	0	0	0	0	0	0.728178	0	0	0	0	0	0	0	0	0	0	0	0	0	0	0	0	NA	NA	NA	NA
Ec-00_005360	Hypothetical protein	Unknown	NA		0	0	0	0	0	0	0	0	0	0	0	0	0	0	0	0	0	0	0	0	0	0	0	0	0	0	0	0	0	0	0	0	0	0	0	0	0	0	0	0	0	NA	NA	NA	NA
Ec-00_005370	conserved unknown protein	Unknown	OG0019620		3.3074	0	0	0	0	0	0	0	1.4325	0	0	0	0.462012	0	0.41463	0	0	0	1.16871	3.25687	2.73173	0	0	1.21426	3.94898	2.82044	2.64036	2.4701	0.752151	0	0.475874	1.13761	0.489014	3.34438	1.70196	3.7225	0	0	1.05124	0	1.02048	NA	NA	NA	NA
Ec-00_005380	hypothetical protein	Unknown	OG0019621		0	0	5.2481	4.8823	4.18038	1.97463	4.15749	3.15114	4.63157	5.74336	5.10103	1.33977	0.811408	3.03046	2.66159	1.69398	1.1857	3.36299	2.58314	2.74547	2.73173	1.27561	0	1.86411	1.20982	0	1.45678	0	1.90196	0	0	2.53622	2.73309	3.66681	2.80924	4.41507	3.73524	1.39397	1.05124	0	0	turquoise	-0.384314	-0.320104	-0.492617
Ec-00_005390	Notch domain	Cellular regulation and signalling	OG0019622		9.67909	9.93816	9.96185	9.92678	9.08759	9.79345	9.99668	9.61005	10.2356	10.2565	11.0642	8.63641	8.96906	9.55523	9.33674	8.81125	8.4471	11.1975	11.0449	10.7887	10.4013	8.04377	8.27956	7.6464	7.57548	4.34297	3.903	7.41383	7.23709	6.66997	6.55461	9.97891	10.2001	10.6244	10.1106	10.6668	10.0595	9.22907	8.71518	5.68954	5.08385	lightgreen	-0.257247	-0.309079	-0.288744
Ec-00_005400	expressed unknown protein	Unknown	OG0019623		0	0	4.73436	4.23329	4.8283	4.2158	2.574	4.1764	3.68863	2.92054	1.33033	2.38144	2.36515	2.06591	1.99878	0	0	0	1.16871	0	0	1.27561	2.26318	3.89358	3.8863	0	0	3.09897	3.80753	0	0	1.92615	1.14434	1.60163	2.6457	1.60093	0	0	0	0	1.6122	NA	NA	NA	NA
Ec-00_005410	Aryl sulfotransferase	Metabolism	OG0000165		8.5838	8.18873	9.12281	8.77052	8.71667	9.1865	9.60707	9.60519	8.91246	8.9247	8.46102	10.7003	10.9145	11.3421	10.6413	9.11738	9.51708	9.06903	9.74139	9.77467	9.94351	9.37327	9.71254	9.49685	9.92486	9.43174	9.19367	9.77706	9.56053	10.1138	10.1395	10.7476	10.9291	10.823	10.8394	9.63303	9.58129	10.8675	10.6466	9.93771	9.93544	turquoise	0.676497	0.307741	0.649097
Ec-00_005420	Histone H4	DNA or chromatin modification	OG0000011		5.50776	6.03601	5.2481	5.09769	5.20847	5.34193	5.81996	3.68092	1.4325	1.85938	2.47088	1.72101	1.09247	0	0.999185	2.45179	1.1857	1.21845	1.16871	2.74547	1.52649	1.27561	0	1.57547	0	1.40803	1.20709	2.00978	1.90196	1.16987	2.17532	1.13761	0.853573	1.33694	0.808298	0	0	2.9092	1.65288	3.1352	2.35455	red	-0.808952	-0.205993	-0.230075
Ec-00_005430	Histone H1	DNA or chromatin modification	OG0019624		10.5471	10.7335	8.28202	8.69401	8.06739	7.56987	7.68039	6.76476	4.90137	5.28959	3.53633	4.53612	4.6744	4.38672	4.29613	3.46723	1.8276	2.65715	2.58314	4.17937	3.61883	4.38502	2.26318	4.07404	4.3248	4.26238	4.06217	4.26027	4.68004	4.99237	4.88389	4.59713	5.07392	5.38188	4.5099	1.60093	1.90196	5.43723	4.74067	5.98385	6.74072	pink	-0.690612	-0.0380851	0.0502499
Ec-00_005440	Histone H3	DNA or chromatin modification	OG0000019		10.0007	9.73437	7.37588	7.50348	7.29362	7.10074	6.99816	5.81211	4.16924	4.90273	4.26118	3.7278	4.2281	4.01241	3.54283	3.95704	3.48516	3.69406	2.8561	3.25687	3.61883	3.25187	4.01809	3.68728	3.60422	3.29572	3.72407	3.53546	4.00492	3.08738	3.32012	3.51114	3.52238	4.02338	3.26876	3.19117	3.4033	2.9092	3.55128	4.52733	3.20613	brown	-0.860048	-0.258082	-0.23818
Ec-00_005450	Dolichyl pyrophosphate Man9GlcNAc2 alpha-1,3-glucosyltransferase, family GT57	Metabolism	OG0004004		7.74547	7.52421	9.26642	10.1053	9.89186	9.57252	8.4504	8.54242	7.82646	7.88418	8.04735	7.48066	7.45129	7.43544	7.31428	8.45931	8.2006	8.72894	8.51844	8.40752	8.45466	7.21708	7.56319	7.42599	7.42927	6.91434	6.97458	7.55406	7.43262	7.16061	7.18955	7.75909	7.68912	7.75952	8.01272	8.80847	8.32141	8.3939	8.29021	8.31708	8.05732	black	-0.615798	-0.290917	-0.411748
Ec-00_005460	Histone H2B	DNA or chromatin modification	OG0000099		14.0846	14.0529	9.80542	10.3585	10.131	9.20094	8.72158	8.36405	7.59248	7.71402	8.12767	8.93155	9.0182	8.88956	8.48889	8.54814	7.33643	8.77337	8.56197	8.01527	8.39545	7.93907	7.77826	9.37879	9.02691	8.56245	8.27951	9.21697	9.96393	8.80618	8.90828	9.02976	8.98346	8.67592	8.1022	7.40745	6.82305	8.00336	7.70755	7.91329	6.56379	blue	-0.514917	0.048647	0.137649
Ec-00_005470	Histone H2A	DNA or chromatin modification	OG0000123		6.34159	6.90045	7.07452	7.68089	7.49884	6.6529	7.03133	6.19507	3.68863	2.92054	2.47088	1.10322	1.70698	0	0.736313	1.08252	2.27029	1.86945	1.80579	2.74547	1.93405	0	0	2.10452	1.85845	0.633432	0	3.09897	3.30684	0.502471	1.11921	1.76567	1.14434	1.82521	1.525	0	0	2.9092	2.07619	4.26057	3.62229	brown	-0.84527	-0.213092	-0.248077
Ec-00_005475	lncRNA	Unknown	NA		13.3075	13.3238	9.69333	9.52333	9.66407	8.17807	8.88168	9.21649	6.10781	7.36879	8.10404	8.01463	8.55245	8.9947	8.17828	7.48156	7.89543	8.903	8.87357	9.22686	9.23795	7.6938	7.62003	6.97453	6.76386	8.75882	9.90667	6.95837	6.91591	10.2047	10.321	9.28514	9.08984	8.6117	9.66375	6.62355	6.44662	8.91555	9.71346	9.42785	7.58735	purple	-0.305849	0.109991	0.18565
Ec-00_005480	expressed unknown protein	Unknown	OG0019625		0	0	0	0	0	0	0	0	0	0	0	0.820122	0	0	0.999185	1.69398	0	0	0	0.964221	0	0	0	0	1.85845	1.40803	0.904947	0.812953	0	0	0.475874	0	0.489014	0	0	0	0	0	0	1.20016	0	NA	NA	NA	NA
Ec-00_005490	expressed unknown protein	Unknown	OG0000345		3.3074	0	0	0	0	0	0	0	0	0	0	0	0	0	0	0	0	0	0	0	0	0	0	0	0	0	0	0	0	0.502471	0	0	0	0	0	0	0	0	0	0	0	NA	NA	NA	NA
Ec-00_005500	hypothetical protein	Unknown	OG0019626		0	0	0	0	0	0	0	0	0	0	0	0	0.462012	0.845388	0.736313	0	0	0	0	0	0	0	0	0	0	0	0	0	0	0	0	0	0	0	0	0	0	0	0	0	0	NA	NA	NA	NA
Ec-00_005510	Exostosin-like	Metabolism	OG0019627		0	0	3.45454	0	0	5.39313	7.09546	1.21034	1.4325	1.85938	0	8.64056	8.34703	8.83271	9.13194	4.23908	2.60856	4.08096	1.80579	5.73621	8.0766	3.45247	3.83811	5.73196	6.73747	7.73628	6.10049	5.1316	4.17852	0	4.56463	2.07054	0.853573	1.60163	0	1.60093	0	0	0	0	0	darkred	0.17843	-0.156141	0.13603
Ec-00_005520	expressed unknown protein	Unknown	OG0019628		5.7655	6.90045	3.45454	2.18955	1.43994	4.32529	4.68778	3.52499	4.52913	5.08136	4.37085	2.48371	3.27525	3.40067	3.58347	3.95704	2.88239	4.71217	4.20738	3.51868	4.16411	3.45247	4.01809	2.9262	4.12215	2.82044	2.91525	3.43809	2.97141	2.7725	2.77851	2.32209	3.1154	3.48211	3.47774	1.60093	2.69475	3.96828	3.9011	3.50859	2.03061	blue	-0.190546	-0.2251	-0.217603
Ec-00_005530	expressed unknown protein	Unknown	OG0019629		9.32594	9.1319	9.45961	9.4856	9.33343	8.84878	8.91464	9.19401	10.3471	10.2172	10.2019	8.76256	8.79854	8.59479	8.14981	9.91362	10.0009	9.65547	9.52383	7.74804	8.09657	9.94716	9.89636	8.05725	8.0096	8.34	7.34348	8.4192	8.33676	7.11364	7.27211	6.61785	7.20817	7.72871	6.15445	8.76192	9.27202	7.93782	7.00679	6.9115	7.25957	turquoise	-0.535663	-0.783376	-0.806548
Ec-00_005540	Dynein regulator LIS1	Cytoskeleton and flagella	OG0003416		7.9669	7.8944	8.44996	8.35528	7.94235	8.53221	8.63792	8.48538	8.29298	8.43186	8.96378	7.46512	7.71762	7.59852	7.70113	7.70666	7.89543	8.14793	8.07997	8.0927	8.12601	7.9721	8.27956	8.15404	8.16948	8.43267	8.48142	8.05874	8.03188	7.9999	8.05705	8.14282	8.10099	8.04442	8.27657	8.11655	8.66084	8.10068	7.88163	8.0608	8.30263	grey	-0.312039	-0.00176054	-0.476084
Ec-00_005550	High mobility group domain protein	DNA or chromatin modification	OG0003417		11.0248	11.0516	8.52434	8.04097	8.32799	7.71777	8.04217	8.10649	7.51419	7.36879	8.53946	7.53824	7.67562	7.44207	7.5167	7.56056	7.39224	7.92976	7.91817	8.02056	7.84839	7.13194	7.42645	7.1855	7.23546	8.24358	8.17015	6.92281	7.01083	8.14498	8.282	7.76706	7.89388	7.7996	7.83903	6.94255	7.74485	7.31212	7.518	8.08168	7.1489	green	-0.472692	0.00683137	-0.0258319
Ec-00_005560	ISC system FeS cluster assembly, IscU scaffold	Metabolism	OG0003415		12.8157	12.6723	11.1181	10.8631	10.9118	9.84492	10.2618	10.5834	11.1927	11.4521	11.6134	11.2267	10.9347	11.1358	11.2092	12.0045	12.0216	11.9626	11.6963	10.9889	11.1653	12.2729	12.2297	10.1223	10.3713	10.9023	10.8138	10.5669	10.5184	11.0238	10.9852	10.4056	10.417	11.3031	11.5188	10.3127	10.6979	11.2341	10.9726	10.7691	10.952	green	-0.0567759	-0.405846	-0.25773
Ec-00_005570	Light harvesting complex protein (probable pseudogene)	Photosynthesis	OG0006902		6.49182	6.90045	7.36347	7.86112	7.45726	7.40506	7.94689	7.93119	6.90617	6.97561	6.89651	7.53527	7.93124	8.03526	7.56823	7.15939	6.87038	7.60538	7.58466	7.44364	7.65327	7.85301	7.88649	7.05551	7.51462	7.14536	7.09915	7.64414	7.46651	6.64616	6.48708	7.5378	7.81595	7.45941	8.06828	7.55514	5.8699	7.23626	7.5759	7.26794	6.8983	grey	-0.0146171	-0.246856	0.0954632
Ec-00_005580	Nug1, nuclear ribosome-associated GTPase	RNA modification or binding	OG0006901		7.07143	7.60624	10.7709	11.1581	10.6199	9.82408	9.95407	10.9521	8.96737	9.12815	9.08943	10.1535	9.61305	9.63257	10.3237	8.99945	10.7358	8.93464	9.08727	9.52754	9.62057	10.263	10.3535	8.62842	8.93894	10.9396	11.2926	9.61385	8.88412	11.3835	11.4417	9.31897	8.87606	10.4054	9.6456	8.8787	10.7343	10.0729	9.9461	10.4021	10.4732	cyan	0.00835109	-0.0771564	-0.121511
Ec-00_005590	Ankyrin repeat-containing domain	Membrane function and transporters	OG0003683		9.49562	9.10394	5.82035	6.02479	7.24557	6.6529	5.98704	6.29502	5.95813	6.47663	5.58354	8.13542	8.13676	7.11725	6.69419	5.51442	4.98156	4.85131	5.1678	6.543	6.42018	5.70476	5.9934	7.381	7.8627	5.73793	4.91781	7.78446	7.83408	7.07404	6.55461	7.3735	8.33891	8.62849	7.73859	6.32737	5.02138	7.26709	6.36624	7.55353	5.87286	turquoise	0.0354102	0.400371	0.690443
Ec-00_005595	lncRNA	Unknown	NA		7.16386	7.24578	6.05462	6.15067	6.59891	7.14621	6.39638	6.16896	1.4325	1.85938	2.0105	2.98002	3.27525	3.69502	3.73546	1.08252	1.1857	1.86945	2.58314	4.8369	4.82131	1.94186	2.26318	5.80191	5.61258	4.5267	4.33589	6.01283	5.02139	4.20936	3.75535	5.3436	4.56042	4.85695	4.60202	5.2327	4.51713	2.0895	3.55128	2.90463	2.03061	pink	-0.515531	0.364055	0.244909
Ec-00_005605	lncRNA	Unknown	NA		7.33267	7.60624	3.63064	5.09769	5.06818	3.66915	3.44747	3.15114	1.4325	4.6239	1.33033	3.50271	3.21788	2.31723	3.45795	1.08252	0	1.21845	0	2.93679	2.25147	0	0	3.44647	3.34931	3.29572	2.42287	2.96555	3.87637	3.79865	3.00606	3.5609	3.66688	4.34562	4.06816	4.54642	0	4.24093	3.55128	4.60631	3.35858	pink	-0.333128	0.405311	0.462545
Ec-00_005610	expressed unknown protein	Unknown	OG0000115		8.11318	8.01942	7.04373	6.70442	7.37031	7.59195	7.98124	7.00507	7.37345	7.28616	7.66137	7.3102	7.99026	8.20067	8.01147	6.77374	6.12589	7.79833	7.73591	7.77335	7.69969	7.62277	7.66125	9.06525	9.29764	8.0886	8.07766	9.23701	9.53813	8.07538	7.94941	8.94564	9.18592	7.4128	7.88101	7.9486	7.67893	8.53355	8.68166	8.33458	8.34432	turquoise	0.458981	0.680825	0.652937
Ec-00_005620	hypothetical protein	Unknown	OG0019630		5.50776	5.05783	3.63064	2.18955	3.25783	7.14621	6.27241	5.47117	5.7911	5.02424	5.53724	7.02232	7.27265	7.0922	6.92517	6.96658	4.86018	6.40256	6.40298	7.53524	7.16936	4.17409	4.57306	7.7867	7.56551	6.89443	6.74155	7.51877	7.62494	6.52738	6.5243	7.24622	7.34694	6.29139	6.50401	7.97216	5.39431	6.71688	6.97025	7.14105	7.66982	brown	0.703153	0.560547	0.626919
Ec-00_005630	RGS domain	Cellular regulation and signalling	OG0019631		6.86662	7.24578	1.27694	3.54657	3.87821	1.97463	1.99014	1.85911	3.48477	3.15146	3.33452	8.45159	7.65685	8.82005	9.33004	5.8581	6.15199	6.23477	6.52531	9.77624	9.65464	7.43414	7.4423	8.9716	9.10811	9.65531	9.83475	8.83477	9.133	9.82194	10.0017	10.3711	9.97395	9.62852	10.0803	9.97951	9.99715	9.59371	9.81999	9.03687	9.02073	turquoise	0.823035	0.740734	0.788254
Ec-00_005640	conserved unknown protein	Unknown	OG0005411		6.86662	6.61362	9.09679	9.21867	9.10565	8.33031	8.94106	9.55567	8.4129	8.59765	8.52174	8.63085	8.5364	8.16907	8.62894	8.49996	8.90779	8.48896	8.53309	8.51269	8.6463	8.90225	8.87762	7.99141	8.15293	9.01701	9.19904	8.50284	8.13732	9.14774	9.21189	8.55248	8.36739	8.91818	8.69263	8.54346	9.03289	9.22122	8.8884	9.03687	9.67724	yellow	0.104861	-0.0821972	-0.176998
Ec-00_005650	expressed unknown protein	Unknown	OG0019632		5.9841	6.03601	4.57119	4.82303	2.14606	1.97463	3.98766	0	9.39631	9.61767	10.2112	7.65791	7.82958	9.05861	8.61798	9.67804	7.56728	11.1307	10.688	7.9939	8.39545	9.05652	8.94035	7.52755	7.85863	6.45198	5.52144	8.5647	8.43701	7.38217	7.17402	6.39594	6.73213	6.50038	6.78026	6.21338	4.60088	8.99595	9.31	8.08858	8.76167	brown	0.641936	-0.0439785	0.0876163
Ec-00_005660	hypothetical protein	Unknown	OG0019633		10.8056	10.5279	6.08519	6.78429	6.76718	5.49038	5.47898	5.51328	6.7555	6.8661	6.14307	5.30963	5.79063	5.35182	5.44687	7.24693	6.01651	6.79621	6.82438	5.01718	5.79557	7.07226	6.66836	7.11855	7.15799	5.09064	4.45545	7.5128	7.53198	4.60477	4.94006	4.93565	5.36976	4.931	5.13656	5.69585	5.02138	6.60069	6.68466	7.14105	7.66982	blue	-0.322225	-0.0683047	-0.0176517
Ec-00_005670	C2H2 zinc finger protein	Transcription	OG0019634	TAP	3.3074	0	0	0	0	1.97463	1.5762	1.21034	0	0	1.33033	2.98002	1.09247	0.845388	0.999185	0	0	1.21845	0	0	1.52649	1.27561	0	2.10452	1.20982	0	0	0.812953	1.24404	0	0.475874	1.37863	1.14434	2.01874	0	2.82785	0	1.39397	0	0	0	NA	NA	NA	NA
Ec-00_005680	Pectin lyase fold protein	Transposon or viral gene	OG0019635		9.11058	8.95536	2.39774	4.55808	4.54041	4.2158	4.94146	4.1764	9.00125	8.69694	9.46208	11.5546	11.3375	11.9332	11.6616	9.18266	10.1147	10.4685	11.5442	10.8962	11.1997	9.48906	9.64908	10.6311	10.7191	10.3168	10.3401	10.416	10.1802	10.2974	10.4276	11.7898	11.6644	12.07	11.8609	12.1904	10.6298	10.3713	10.2892	10.0777	9.6498	brown	0.902833	0.456577	0.572687
Ec-00_005690	Ankyrin-repeat protein similar to EsV-1-21	Transposon or viral gene	OG0019636		0	3.55699	1.27694	3.02206	3.69951	1.97463	0.993432	2.92022	4.81692	4.54488	5.16334	6.31926	6.37346	6.9783	6.76657	1.69398	1.1857	4.38574	6.2693	5.85949	5.81979	3.45247	1.53617	0	0	0	0	0.812953	0	0	0	7.45141	6.57615	6.94359	6.58526	6.96621	5.39431	0	0	0	0	lightgreen	0.142148	-0.159934	0.0305594
Ec-00_005700	hypothetical protein	Unknown	OG0019637		0	0	1.27694	2.52327	2.14606	1.30166	2.31141	1.21034	0	0	0	0.467569	0.462012	0	0.41463	2.12208	0	0	0	0	0	1.27561	1.53617	0	0.728178	0	0	1.70947	0.752151	0	0	0.485483	0.489014	1.01252	0.460032	0	2.35214	0	0	0	1.02048	NA	NA	NA	NA
Ec-00_005710	Hypothetical protein	Unknown	OG0019638		0	0	1.27694	1.75464	1.43994	2.77832	2.574	0	0	0	0	1.87949	0.811408	0.845388	1.58388	1.08252	0	0	1.16871	2.52483	0.95637	0	0	2.10452	1.57029	1.40803	2.42287	0.812953	1.24404	3.15642	1.74182	2.72263	3.04662	2.72156	2.95611	3.19117	2.69475	3.42868	4.62004	2.29071	2.35455	NA	NA	NA	NA
Ec-00_005720	Hypothetical protein	Unknown	OG0019639		0	0	1.27694	1.75464	1.43994	3.96821	0.993432	0	0	1.21055	1.33033	0.467569	0.462012	0	0.736313	0	0	1.21845	1.16871	5.21484	0.95637	0	0	1.57547	0.728178	3.21238	2.01923	2.00978	0.752151	0.874424	2.77851	2.20179	1.59332	1.33694	0.808298	4.54642	0	3.80983	5.68365	2.29071	0	grey	0.15188	0.435434	0.231381
Ec-00_005730	Hypothetical protein	Unknown	OG0019640		0	3.55699	1.94355	4.03859	2.97312	4.09731	3.15823	1.85911	2.13694	0	1.33033	3.76889	4.13819	3.86242	3.99847	3.31352	0	0	0	5.38865	5.61357	1.27561	0	3.53128	1.57029	3.98948	3.40562	3.22108	3.65914	4.62926	4.12201	6.10872	5.45185	5.45062	3.93279	4.54642	4.68003	5.49044	4.95534	4.68119	4.56249	turquoise	0.343972	0.63101	0.67063
Ec-00_005740	Hypothetical protein	Unknown	OG0019641		4.23263	3.55699	1.27694	3.21885	3.25783	3.29142	2.31141	1.21034	2.6082	1.85938	0	0.820122	0.811408	0	0.41463	0	0	0	0	2.26425	2.51149	1.27561	1.53617	1.57547	1.20982	0	1.85496	1.70947	2.14454	0.502471	2.04477	3.1701	0.489014	1.01252	1.70196	3.48116	2.69475	1.39397	2.07619	1.20016	0	NA	NA	NA	NA
Ec-00_005745	lncRNA	Unknown	NA		0	0	1.27694	0	0	1.97463	2.31141	0	0	0	0	0	0	0	0	0	0	0	0	0.964221	1.52649	0	0	0	1.57029	0	0.522295	0	0.752151	0	0	0	0	0.59332	0	0	0	0	1.05124	0	0	NA	NA	NA	NA
Ec-00_005750	Hypothetical protein	Unknown	OG0019642		0	4.49436	4.28557	5.59957	4.73857	6.40109	5.34471	3.52499	2.96284	3.82197	3.09981	5.14771	5.08062	4.77044	4.87289	0	3.48516	2.3164	2.58314	6.55764	6.35537	3.62854	3.39248	4.7051	4.58371	5.9197	7.15321	4.52025	4.47336	7.35672	7.06035	7.21937	6.64756	6.17433	6.71986	5.57797	5.83574	6.57628	7.03065	6.4585	6.26895	grey60	0.338624	0.590831	0.530173
Ec-00_005760	Armadillo-type fold	Cellular regulation and signalling	OG0019643		7.25074	7.1396	0	2.79411	3.87821	0	1.99014	2.30503	1.4325	0	0	5.4298	5.74058	4.08193	4.32038	2.94606	0	0	2.58314	5.42104	5.16171	1.94186	0	5.34364	4.69759	3.21238	3.07314	4.96681	5.48528	4.14286	3.66935	5.32932	6.23345	5.63913	6.1002	5.38086	1.24404	4.66789	4.41777	6.17734	6.51595	turquoise	0.334824	0.672966	0.897772
Ec-00_005770	Pectin lyase fold/virulence factor	Cell wall and extracellular	OG0003354		9.56507	9.71601	7.2055	7.30115	7.47125	6.83055	7.06375	7.36842	7.77143	7.14594	8.71612	9.11901	8.95706	9.39373	9.67374	8.20986	8.40973	8.5718	8.43765	7.6558	8.76956	7.87064	7.82737	8.41344	7.99853	7.22726	6.43467	8.16907	8.41404	7.03791	7.13042	7.32753	7.46035	7.85771	6.46774	7.60119	6.61722	8.66666	8.21931	7.62166	7.39798	grey	0.0932491	-0.194992	0.216454
Ec-00_005780	ribosome recycling factor	Protein synthesis	OG0004434		9.28537	9.38525	11.3347	11.5415	11.2336	11.7233	11.8572	11.6774	9.81081	10.2076	10.6659	10.3876	10.4128	10.0518	10.517	10.573	10.7141	10.9097	10.5531	10.3716	10.4192	11.0263	11.0536	9.90412	10.0228	11.1765	11.5435	9.95919	9.51807	10.7919	10.799	10.6984	10.3055	10.4428	9.90269	9.31617	10.7607	10.2141	10.2942	10.2351	10.3682	magenta	-0.398058	-0.433941	-0.526672
Ec-00_005790	Zinc finger, RING/FYVE/PHD-type	Cellular regulation and signalling	OG0000282		13.8228	13.6852	10.0004	9.83224	10.4676	9.10823	9.12128	9.56321	9.87487	9.64871	9.40842	8.77017	8.96362	9.40225	9.283	9.66022	9.61179	9.38184	9.36359	9.53311	9.39129	9.88997	9.75122	9.74231	9.47182	8.76432	8.77228	9.84155	9.80305	9.5756	9.40388	9.57574	9.75296	9.57468	10.3154	9.30693	9.00241	9.87706	10.1654	9.94153	10.2055	green	-0.350081	0.105121	0.134525
Ec-00_005800	S-adenosyl-L-methionine-dependent methyltransferase	Metabolism	OG0001300		5.9841	5.77737	6.93046	6.56666	6.87639	6.86722	6.51054	6.36568	6.48149	6.88226	5.83391	5.4298	5.61287	5.48611	5.84806	6.24581	6.2519	6.28473	6.72575	6.35466	6.06241	6.19911	6.0358	6.45078	6.15483	6.03334	5.81768	6.40948	6.07419	5.16983	5.06321	5.93093	5.03893	5.80584	5.60578	6.39864	6.75156	5.54176	6.00598	5.4536	5.24904	turquoise	-0.594947	-0.361495	-0.643342
Ec-00_005820	cytochrome P450	Metabolism	OG0000096		7.07143	7.52421	4.17624	3.68618	4.18038	6.27028	6.30893	6.14237	9.38901	8.73303	8.63049	8.47816	9.31947	10.6186	10.6017	7.88096	8.20684	7.60538	8.20727	7.34582	8.1453	7.56981	7.94328	9.04556	9.51647	8.49352	7.95621	8.64599	8.30901	6.25572	6.74533	6.86562	6.46852	7.14369	10.2918	7.9003	6.55558	8.17571	7.87506	6.54123	6.32556	brown	0.607453	0.0443348	0.25533
Ec-00_005810	conserved unknown protein	Unknown	OG0000121		0	6.90045	4.48212	3.54657	2.97312	5.34193	4.30942	3.35014	6.14292	5.59435	6.17366	3.95843	3.27525	4.81195	4.90531	1.69398	0	2.3164	2.58314	1.53706	1.52649	0	0	4.59119	4.54365	1.07211	1.45678	5.035	4.33346	1.16987	0.475874	3.5609	3.36179	3.10948	4.27821	3.92919	1.90196	0	1.05124	0	1.02048	grey	-0.300594	-0.114837	-0.100374
Ec-00_005830	Notch domain	Cellular regulation and signalling	OG0019644		7.86043	8.18873	4.48212	4.82303	5.75771	5.9324	5.63096	5.02389	8.0464	7.42504	6.74177	15.3696	15.5636	16.109	14.6562	11.3497	10.9443	8.31354	8.42198	10.5795	11.8513	13.1376	13.345	14.31	15.0221	12.3961	10.0292	15.0834	15.0293	7.56786	8.49385	11.6999	13.3461	11.6822	12.761	10.3891	6.40062	13.4424	12.5734	11.3131	9.99337	turquoise	0.71918	0.270794	0.650075
Ec-00_005840	Hypothetical protein	Unknown	OG0019645		0	0	0	0	0	0	0	0	0	0	0	0	0	0	0	3.31352	2.27029	0	0	0	0	0	0	0	0	1.07211	0	0	0	0	0	0.485483	0	0	0	0	0	1.39397	1.05124	0	0	NA	NA	NA	NA
Ec-00_005850	cytochrome P450	Metabolism	OG0000096		9.59857	9.71601	7.65591	7.10359	7.07276	7.51314	7.73509	7.06293	10.2069	10.0663	9.50782	10.0769	10.4124	10.8253	10.298	9.40112	8.61598	9.97371	9.89301	10.5902	10.3943	9.72294	9.72231	9.10557	9.31559	8.73102	9.06563	9.79437	9.57095	9.19363	9.06596	11.2846	11.4243	11.187	11.5165	9.63303	9.41771	10.5821	10.7154	9.81006	10.2317	brown	0.795201	0.363865	0.5578
Ec-00_005860	Harbinger transposase-derived nuclease domain	Transposon or viral gene	OG0019646		0	0	0	0	0	0	0.993432	0	0	0	1.33033	1.10322	0.462012	1.3749	0.999185	0	0	0	0	1.94599	2.73173	0	0	0	0	0	0	0.812953	0	0	0	0	0	0.59332	0	0	0	0	0	0	0	NA	NA	NA	NA
Ec-00_005870	Hypothetical protein	Unknown	OG0019647		0	0	8.22139	8.47082	7.82736	8.06422	8.25366	7.66778	0	1.85938	3.871	1.33977	0	0	1.22146	6.04065	6.04465	7.57558	6.9462	5.21484	5.79557	0	0	1.57547	1.20982	1.68033	1.45678	2.96555	2.35214	2.68174	2.29502	1.13761	1.59332	2.34191	1.08863	6.56279	6.30397	5.85748	6.02986	6.32476	5.28754	black	-0.405776	-0.157568	-0.387795
Ec-00_005880	hypothetical protein	Unknown	OG0019648		0	0	0	1.12909	0	2.77832	4.15749	0	0	1.21055	1.33033	7.22786	6.76758	8.34905	9.08937	1.08252	0	2.65715	1.80579	5.42104	7.34653	3.01882	3.63244	5.91671	6.72856	8.3027	6.14564	4.42181	3.49372	0	4.15403	1.92615	1.38623	1.60163	0.808298	0	0	1.39397	0	0	0	darkred	0.308753	0.012469	0.301767
Ec-00_005890	conserved unknown protein	Unknown	OG0019649		3.3074	5.77737	7.16315	7.54075	7.53926	9.01734	7.88171	7.35691	5.7911	7.68667	7.60637	7.58213	7.99667	7.8926	7.71262	7.42638	8.169	8.48363	8.07997	8.48232	8.08662	6.4542	5.94971	6.06632	5.40471	6.89443	7.5081	5.9257	5.999	7.45249	7.71999	8.29022	8.26514	7.66866	8.0043	6.7379	7.16324	8.12613	8.47111	8.63692	9.36253	blue	0.243528	-0.0714459	0.026687
Ec-00_005900	WD40 repeat	Protein binding or modification	OG0002959		9.24361	9.4083	7.98251	8.15952	7.73757	7.7864	8.15179	7.89978	9.11614	9.30342	9.7196	9.6037	9.62276	9.74132	9.5121	9.08508	9.08756	9.57242	9.42775	9.76366	9.66637	9.30036	9.32076	9.21858	9.11496	9.79167	10.0916	9.02493	9.0701	9.88369	9.89202	9.85101	10.1029	9.67056	10.2268	8.90342	8.92734	9.79748	10.1505	9.76773	10.1725	brown	0.84062	0.434874	0.553467
Ec-00_005910	Predicted: Tubulin-tyrosine ligase-related protein	Cytoskeleton and flagella	OG0019650		7.16386	7.8944	7.5935	8.11079	7.32478	6.73457	6.88176	7.4136	6.45379	6.69366	6.31759	7.07242	5.8579	5.98063	7.11039	7.92807	7.85628	7.47156	7.79386	7.01554	7.26067	7.14649	6.91546	6.42884	7.0901	8.35222	7.98879	7.13188	6.05946	7.68055	7.82566	4.81781	4.6326	6.55604	5.44094	8.08449	7.49415	6.44765	6.55904	6.41528	6.49964	grey	-0.353345	-0.174379	-0.412718
Ec-00_005920	Glucose-methanol-choline oxidoreductase	Metabolism	OG0002958		9.01454	9.04633	8.12906	7.88306	8.0857	7.64571	7.7748	7.81814	8.73973	8.53769	7.93576	7.67423	7.42935	7.81815	7.94284	7.41697	8.37137	7.88996	8.34655	8.34138	8.36285	7.86185	7.6339	8.78126	8.57169	7.86807	8.09157	9.05398	9.2299	8.75701	8.80367	7.94856	8.01134	7.92267	7.52281	8.94568	8.25186	9.14445	9.01938	9.04752	9.20047	grey	0.158196	0.555853	0.327421
Ec-00_005930	Chalcone Isomerase-like	Metabolism	OG0002957		9.63132	9.4083	11.2317	10.9881	11.3705	10.2158	11.2282	11.4924	10.5039	9.77094	10.0597	9.96198	9.99776	9.80181	10.1695	9.96777	10.8568	9.40178	9.49417	9.47453	9.44483	10.2224	9.88771	9.8638	9.58467	10.0839	10.5507	9.37988	9.5813	10.7275	10.6859	10.457	10.4423	10.3553	9.96148	9.01536	11.5682	10.3171	9.40434	10.3628	10.1161	greenyellow	-0.427277	-0.229052	-0.349357
Ec-00_005940	conserved unknown protein	Unknown	OG0002956		10.155	10.1444	11.356	11.1423	11.1993	10.6447	11.4722	11.4585	12.1756	11.3233	11.8179	11.7799	11.6994	11.6075	11.85	10.9377	12.3614	10.8055	10.5591	10.9883	10.8333	12.3393	12.371	11.65	11.023	12.6657	13.4475	10.5126	10.7151	12.7344	12.8224	12.1793	11.9959	11.9938	11.6869	10.413	12.6288	11.5037	10.8362	11.8015	11.6406	blue	0.331231	0.0110032	-0.0455975
Ec-00_005950	Serine/threonine/dual specificity protein kinase, catalytic domain	Cellular regulation and signalling	OG0002955		9.49562	9.07542	10.5256	10.1572	10.0771	9.60816	9.35318	9.76187	10.0306	10.4707	9.94026	8.43733	7.96433	7.48119	7.95451	9.90692	10.2538	9.75188	9.75187	9.32425	9.1307	8.50524	8.08127	7.82079	7.40712	9.0742	9.03836	7.80413	8.09823	9.16878	9.29501	7.99229	8.07963	8.1123	8.15638	9.32991	9.64186	9.37062	9.21167	9.28811	9.90481	midnightblue	-0.527792	-0.363834	-0.663533
Ec-00_005960	conserved unknown protein	Unknown	OG0002954		7.9669	7.7575	1.94355	3.81345	4.31063	1.30166	1.5762	1.85911	3.24728	3.15146	2.81935	8.96509	9.12544	8.43127	8.47276	3.73282	4.58167	3.16378	3.8806	8.7156	8.18314	4.73216	5.28558	8.12363	7.92249	7.07632	6.5331	7.3281	7.85981	7.38935	7.42755	8.20477	9.04647	8.78808	9.18955	6.81809	5.999	8.03951	8.17182	9.33525	8.74101	turquoise	0.669332	0.682178	0.944449
Ec-00_005970	expressed unknown protein	Unknown	OG0000213		10.0131	9.78808	9.47988	9.46151	9.46863	8.38823	8.1417	9.05124	8.82868	9.17482	8.90574	8.51486	8.67342	9.20991	8.57202	7.56908	8.23763	8.02102	8.37394	8.56796	8.706	7.9721	8.19789	9.27808	8.80981	7.37351	7.27605	9.38642	9.24462	8.05744	7.97429	8.83625	8.97191	8.34	9.14143	9.72256	8.18559	8.08347	8.55576	7.91329	8.19535	blue	-0.436481	0.0549366	0.117617
Ec-00_005980	hypothetical protein	Unknown	OG0019651		0	0	0	0	0	0	0	0	0	0	0	0	0	0.845388	0	0	0	0	0	0	0.95637	1.94186	0	2.10452	1.85845	0	0.904947	0	0	0	0	0.485483	0	0	0	0	0	2.0895	2.07619	0	0	NA	NA	NA	NA
Ec-00_005990	conserved unknown protein	Unknown	OG0019652		9.01454	9.26413	5.85624	5.32833	5.71129	7.36715	6.96422	5.87806	7.51419	7.84349	6.93273	6.11133	5.49707	6.10273	6.10692	4.32204	4.33063	5.30312	5.77264	5.83566	6.30478	6.82349	6.938	0	0	0	0	0	0	0	0	6.53935	6.46852	7.30554	6.71471	7.63109	6.30397	0	0	0	0	lightgreen	-0.400241	-0.473894	-0.366651
Ec-00_006000	expressed unknown protein	Unknown	OG0019653		0	0	1.94355	1.12909	0	1.30166	1.5762	1.21034	0	0	0	0.467569	0	0	0.736313	0	0	0	0	0	0	0	1.53617	0	0	0	0	0	0.752151	0	0	0.485483	0.853573	0	0.808298	0	0	0	0	0	0	NA	NA	NA	NA
Ec-00_006010	hypothetical protein	Unknown	OG0019654		4.23263	5.77737	5.3523	6.45395	6.52032	5.62496	4.79466	5.23993	2.96284	3.68126	3.33452	4.53612	3.97462	3.28751	4.14142	3.84928	2.88239	3.83488	4.10646	4.88412	4.43891	3.92695	4.01809	0	0	0	0	0	0	0	0	4.49844	4.28986	4.6678	4.43673	5.30868	5.08093	0	0	0	0	lightgreen	-0.554548	-0.46755	-0.370832
Ec-00_006020	EsV-1-8	Transposon or viral gene	OG0019655		4.79178	0	1.27694	1.12909	1.43994	2.77832	0.993432	1.21034	2.96284	1.21055	1.33033	0.820122	0	0.845388	1.41402	2.12208	0	1.21845	0	1.53706	1.52649	0	0	0	1.57029	0	0.522295	1.70947	2.69475	0.502471	0.475874	2.43312	1.77438	2.60577	0.460032	3.19117	1.24404	0	2.07619	1.84612	1.02048	NA	NA	NA	NA
Ec-00_006030	Hypothetical protein	Unknown	OG0019656		0	0	7.16315	6.7369	6.91786	7.21896	7.68039	7.98455	0	0	1.33033	0.820122	0.811408	0	1.22146	6.13545	7.9925	7.38258	6.93152	7.85265	7.65327	0	0	0	0.728178	0	0.904947	0	0	0.874424	1.11921	1.37863	0.489014	0.59332	0	6.04589	7.61993	8.10068	8.23479	8.61799	7.87338	black	-0.238581	-0.12679	-0.252571
Ec-00_006040	Vesicle coat complex COPI, beta sub-unit	Vesicle trafficking and secretion	OG0004913		8.32819	8.01942	9.49134	9.46151	9.80887	9.51301	10.1097	10.6055	9.85118	9.96365	10.4265	10.2469	10.3587	10.5664	10.6085	9.49574	10.8617	10.0094	10.0371	10.4531	10.2941	10.0609	9.82864	9.73227	9.01415	10.4174	11.3327	9.10246	9.50046	11.4434	11.5431	10.8275	10.8938	10.4889	10.5604	9.42686	10.6459	11.1279	11.1216	11.3124	11.0533	blue	0.545021	0.1725	0.183323
Ec-00_006060	expressed unknown protein	Unknown	OG0019657		0	0	0	0	0	0	0	0	3.48477	2.30532	0	3.55063	1.86482	1.76139	2.5836	1.08252	2.27029	0	1.16871	3.83937	2.92276	0	1.53617	0	0	0	0	0	0	0.502471	0	6.32573	5.47821	5.39937	5.47788	7.99533	3.5788	0	0	0	0	grey	0.374128	0.254039	0.260376
Ec-00_006070	Ankyrin repeat-containing domain	Membrane function and transporters	OG0019658		0	0	0	0	0	0	0	0	0	0	0	0	0	0	0	0	0	0	1.16871	0	0	0	0	0	0	0	0	0	0	0	0	0	0	0	0	0	0	0	0	0	0	NA	NA	NA	NA
Ec-00_006080	Ankyrin-repeat protein similar to EsV-1-8	Membrane function and transporters	OG0019659		0	0	0	1.75464	0	0	0	0	1.4325	0	0	1.10322	0	0	2.22111	1.08252	0	1.86945	1.80579	1.53706	0	0	2.26318	0.731276	0	1.40803	0.522295	0.812953	0	2.1154	0	1.13761	0.853573	1.01252	1.70196	2.82785	1.24404	0	1.65288	1.84612	1.02048	NA	NA	NA	NA
Ec-00_006090	Ankyrin-repeat protein	Membrane function and transporters	OG0019660		0	0	0	1.12909	0	0	0	0	0	0	0	0.467569	0	0	0	0	0	0	0	0	0	0	0	0	0	0.633432	0	0	0	0	0	0	0	0	0	0	1.24404	0	0	1.84612	0	NA	NA	NA	NA
Ec-00_006100	EsV-1-199	Membrane function and transporters	OG0019661		3.3074	4.49436	0	0	0	0	0.993432	0	1.4325	0	2.0105	0.467569	0	0	0	0	1.1857	1.21845	0	0	0	1.27561	1.53617	0	0.728178	0	0.904947	0.812953	1.24404	1.16987	1.35786	0.848085	0	0.59332	0.460032	0	1.24404	1.39397	2.07619	0	0	NA	NA	NA	NA
Ec-00_006120	FirrV-1-A34	Transposon or viral gene	OG0019663		0	0	0	0	0	0	1.5762	0	0	0	3.09981	0	0	0.845388	0	1.08252	0	0	1.16871	1.53706	0.95637	0	0	0	0	0	0.904947	1.32976	0	0.874424	0	0	0.853573	0	0	0	0	0	2.07619	1.20016	0	NA	NA	NA	NA
Ec-00_006130	EsV-1-159 galactose-binding domain-like protein	Transposon or viral gene	OG0019664		0	0	1.27694	0	0	0	0	0	0	0	0	0	0	0	0	2.12208	1.1857	0	0	1.53706	0	0	0	0	0	0	0	0	0	0	0	0	0	0	0	2.82785	0	2.5568	1.05124	1.84612	0	NA	NA	NA	NA
Ec-00_006140	EsV-1-207	Transposon or viral gene	OG0019665		0	0	0	0	1.43994	1.30166	0.993432	0	0	0	0	0	0	0	0	0	0	0	0	0.964221	0	0	0	0	0	0	0	0.812953	0	0	0	0	0	0	0	0	0	0	0	0	1.02048	NA	NA	NA	NA
Ec-00_006110	EsV-1-117 BRO N-terminal domain protein	Unknown	OG0019662		4.23263	0	1.27694	0	0	1.30166	0.993432	0	4.41885	2.64548	5.03592	1.33977	0.811408	2.88244	1.99878	4.15105	2.60856	1.21845	0	1.94599	1.93405	4.17409	4.17809	3.75937	4.0667	4.5267	4.91781	4.47187	4.12294	4.07316	4.58826	2.20179	2.07993	3.41489	2.6457	3.48116	1.24404	3.42868	3.55128	3.80494	2.03061	NA	NA	NA	NA
Ec-00_006170	EsV-1-13	Transposon or viral gene	OG0019666		0	0	0	0	1.43994	0	0.993432	0	0	0	0	0	0	0	0	2.12208	1.8276	2.3164	1.16871	2.74547	0.95637	0	0	0	0	0	0	0	0	0	0	0	0	0	0	4.41507	2.35214	2.5568	2.40305	1.20016	2.61893	NA	NA	NA	NA
Ec-00_006180	Viral histidine kinase-like protein	Cellular regulation and signalling	OG0019667		3.3074	0	1.27694	0	0	0	0.993432	0	4.29944	3.15146	5.28041	0.467569	0.462012	1.76139	1.22146	3.31352	2.60856	1.21845	1.16871	1.53706	0.95637	3.62854	4.01809	1.21426	1.57029	2.28059	2.82931	1.32976	1.90196	2.36915	1.11921	2.07054	0.853573	1.60163	2.46123	1.60093	1.24404	4.11103	3.55128	2.29071	1.6122	NA	NA	NA	NA
Ec-00_006190	EsV-1-187 replication factor C small subunit	Metabolism	OG0019668		3.3074	0	0	1.12909	0	1.30166	0.993432	1.21034	3.86722	3.68126	5.62841	0	0	0	0.999185	2.45179	1.1857	0	0	0.964221	1.52649	2.74071	3.83811	1.86411	1.85845	3.12392	3.14605	1.32976	0.752151	1.62442	2.50821	1.58509	0.853573	1.01252	1.525	2.34107	2.35214	3.1922	2.8941	0	2.61893	grey	0.142064	0.0411534	-0.257425
Ec-00_006200	EsV-1-50 Ig-like fold protein	Transposon or viral gene	OG0019669		0	0	0	0	0	0	0	0	0	0	0	0	0	0	0	0	0	1.86945	1.16871	0	0	0	0	1.86411	2.09853	0	0	0	0	0	0	0	0	0	0	0	1.24404	1.39397	1.05124	1.20016	0	NA	NA	NA	NA
Ec-00_006210	tRNA Asp	Protein synthesis	NA		4.23263	0	3.78756	1.75464	2.14606	1.30166	0.993432	1.21034	0	0	1.33033	0	0	0	0	0	0	0	0	0	0	0	0	0	0	0	0	1.32976	0	0	0	0	0	0	0	0	0	0	0	0	0	NA	NA	NA	NA
Ec-00_006220	tRNA Asp	Protein synthesis	NA		0	0	1.27694	1.12909	1.43994	0	0.993432	0	1.4325	0	0	0	0	0	0	0	0	0	0	0	0.95637	0	0	0	0	0	0	0	0	0	0	0	0	0	0	0	0	0	0	0	0	NA	NA	NA	NA
Ec-00_006230	tRNA Asp	Protein synthesis	NA		0	0	1.27694	1.75464	0	0	0	0	0	0	0	0	0	0	0	0	0	0	0	0	0	0	0	0	0	0	0	0	0	0	0	0	0	0	0	0	0	0	0	0	0	NA	NA	NA	NA
Ec-00_006240	EsV-1-47 strawberry notch helicase C domain protein	RNA modification or binding	OG0019670		3.3074	4.49436	4.94899	4.8823	4.8283	3.66915	4.37978	4.90238	4.52913	4.37253	5.33556	1.72101	2.96242	1.3749	2.87306	2.94606	1.8276	3.16378	2.58314	2.74547	3.50394	3.78545	3.63244	3.15725	2.09853	3.98948	2.64036	2.25822	2.14454	2.7725	1.11921	3.98204	3.66688	2.18935	4.13136	2.34107	1.90196	2.5568	2.66937	3.50859	3.35858	NA	NA	NA	NA
Ec-00_006250	tRNA Phe	Protein synthesis	NA		0	0	0	0	0	0	0	0	0	0	0	0	0	0	0	0	0	0	0	0	0	0	0	0	0	0	0	0	0	0	0	0	0	0	0	0	0	0	0	0	0	NA	NA	NA	NA
Ec-00_006260	Strawberry notch, helicase C domain	RNA modification or binding	OG0019671		0	3.55699	0	0	0	2.43173	0.993432	1.21034	0	0	1.33033	0	0.811408	0	0	0	0	0	0	0	0	0	1.53617	0	0	5.45935	5.71359	0	0.752151	4.14286	4.15403	0	0	0	1.08863	0	0	0	1.05124	0	1.02048	grey	0.0135804	0.213849	0.0171362
Ec-00_006270	Light harvesting complex protein; possible pseudogene	Photosynthesis	OG0019672		3.3074	4.49436	1.27694	0	2.14606	1.30166	0.993432	0	0	2.92054	5.28041	2.15218	3.33043	5.60895	6.02814	5.32628	5.47057	5.14979	4.55249	2.74547	3.24242	5.88901	6.077	5.96324	4.50246	7.90171	8.0303	2.96555	3.20346	6.30976	6.44887	3.94504	4.02967	4.90673	4.13136	5.30868	5.9359	0	2.07619	3.93303	2.35455	royalblue	0.486564	0.196834	0.115563
Ec-00_006280	Light harvesting complex protein	Photosynthesis	OG0000098		8.15883	7.8944	8.10689	8.90879	7.78316	8.17807	9.09277	7.01975	8.39116	8.30571	10.7122	5.16321	5.82945	7.13372	8.58083	11.3071	10.9103	12.3509	10.7779	10.4144	10.6179	9.67107	9.06331	9.51648	8.40286	8.76249	11.5498	7.75948	8.11968	7.1856	9.34355	8.06521	7.33617	7.44685	6.06826	9.2112	11.4462	7.31212	7.39472	8.79279	9.34667	grey	0.036612	-0.11096	-0.477697
Ec-00_006290	Light harvesting complex protein	Photosynthesis	OG0019673		9.4596	8.71772	7.90753	7.15257	7.8382	7.60286	8.41314	6.43305	9.34068	9.38225	11.9558	6.78757	7.34477	8.91835	8.61676	10.7199	9.91012	11.4854	10.8254	10.0735	10.7872	9.5856	9.27281	8.08206	6.57807	9.94153	10.2765	6.44751	7.09989	8.20325	10.2579	8.35158	8.27081	8.16183	7.53162	7.79856	10.4733	5.32452	5.77123	8.26933	6.62521	royalblue	0.0570135	-0.27993	-0.470997
Ec-00_006300	Hypothetical protein	Unknown	NA		11.7316	11.7824	8.30817	8.73478	8.65669	9.66394	8.90573	6.83286	10.5843	10.9799	12.3707	8.29338	9.79447	11.3896	11.313	12.6905	11.9953	12.77	12.0891	11.9391	11.5882	12.8913	13.0659	12.2127	11.8054	14.0392	13.9328	10.6087	10.5713	11.3037	11.5359	10.859	9.91125	10.6322	9.90438	13.1125	13.4606	8.60767	9.91599	10.3671	8.26935	royalblue	0.371504	0.12789	-0.115187
Ec-00_006310	Light harvesting complex protein	Photosynthesis	OG0019674		10.0499	10.1716	10.9246	10.6289	9.96786	10.297	11.6144	10.3139	11.9898	11.7993	14.0327	9.81094	9.86157	10.139	10.5992	12.7021	12.9999	13.5642	12.9748	12.4229	12.3808	11.2329	10.4837	11.2107	9.74448	12.997	13.9365	9.30418	10.4087	12.4888	12.8309	11.7094	11.2695	9.73571	9.17087	11.4317	13.5395	9.41602	10.0165	11.077	10.2886	royalblue	0.119511	-0.10351	-0.480519
Ec-00_006320	DNA polymerase mu	DNA or chromatin modification	OG0001979		4.23263	4.49436	6.65288	6.43428	6.52032	6.849	6.37931	6.84939	7.72584	7.57178	6.96807	5.71905	5.3446	5.90591	5.68023	7.00475	7.06148	6.61277	6.60146	5.83566	6.04197	6.76813	6.82164	5.19557	5.68801	6.19404	5.81768	5.51259	5.32212	5.70726	5.40669	4.97288	4.88984	5.62433	5.53743	6.76513	7.21732	6.11637	6.02986	5.22243	6.12754	turquoise	-0.227843	-0.594318	-0.808947
Ec-00_006330	Sept7ps, septin GTPase, pseudogene	Cellular regulation and signalling	OG0019675		0	0	0	1.75464	0	0	0.993432	0	1.4325	0	0	0	0	0	0.41463	0	0	0	0	0	0.95637	1.27561	0	0	0	0	0	1.70947	0	0	0	0	0	0	0	0	1.24404	1.39397	1.05124	0	0	NA	NA	NA	NA
Ec-00_006340	ferric reductase	Metabolism	OG0000033		11.658	11.574	6.0234	8.51362	7.53926	7.36715	7.56433	7.091	6.7094	6.24627	8.80185	7.24252	6.892	8.17306	9.97851	7.67545	9.18241	8.52579	8.995	13.2155	12.68	12.9339	12.6696	12.3532	11.3488	13.0085	14.3318	11.3986	12.2335	14.4658	14.787	14.0122	13.5844	12.8401	12.8145	12.4452	12.7182	12.9745	12.6988	13.2784	12.6531	salmon	0.593224	0.787918	0.58976
Ec-00_006350	Light harvesting complex protein	Photosynthesis	OG0019676		10.7245	10.8391	10.6121	10.63	9.64568	10.977	11.8487	9.48865	12.5099	12.5436	15.1123	11.3576	12.2899	12.8111	13.066	15.0645	14.2447	15.62	14.7567	14.0269	13.9509	14.4248	14.3607	13.8053	13.3537	15.8621	15.9248	12.7108	12.7405	14.6506	14.6089	13.1394	12.577	12.086	10.9807	13.9327	15.0369	10.6303	11.9395	12.1122	11.5225	royalblue	0.528051	0.0676817	-0.166308
Ec-00_006360	expressed unknown protein	Unknown	OG0019677		4.23263	5.462	7.43641	8.48523	7.79434	10.3269	9.8649	8.44787	3.68863	3.52533	5.03592	0	1.70698	0.845388	0	7.58596	7.78303	9.45185	9.27045	8.23611	8.82745	1.27561	0	2.31053	2.09853	0	0	2.00978	1.61018	0	0	0.485483	1.14434	0	0.808298	10.2895	9.06273	9.4365	10.1409	8.32293	8.30733	black	-0.37317	-0.162337	-0.353205
Ec-00_006370	Mannuronan C-5-epimerase	Cell wall and extracellular	OG0000027		11.2365	10.7696	6.80753	7.43584	6.547	9.07335	9.78937	8.36405	10.6376	9.46775	13.1796	8.17608	10.737	8.46419	7.72403	6.53379	7.2302	8.76019	8.64528	7.97766	7.94515	8.13411	8.24383	10.326	10.2813	7.54087	7.05724	11.1523	10.6366	7.80672	6.78677	9.11446	8.91758	7.27743	9.00782	8.43744	8.57025	8.03951	8.60427	6.94228	7.38915	grey	-0.0339209	0.0291864	0.00870669
Ec-00_006380	Mannuronan C-5-epimerase	Cell wall and extracellular	OG0000027		8.9895	8.78971	5.58398	6.33169	6.547	8.26309	9.20844	7.53099	8.78489	8.09996	11.8137	5.94202	8.94495	6.6177	5.52197	3.73282	4.72763	8.14117	7.61253	6.77367	6.78252	6.33228	5.81011	8.00631	7.72623	5.44116	5.07544	8.33717	7.85981	7.41775	6.50581	7.83182	7.9349	6.09065	7.34759	6.21338	7.34425	7.73227	8.30984	7.04509	7.57961	grey	-0.0861898	0.0705252	0.00150867
Ec-00_006390	hypothetical protein	Unknown	OG0000348		5.7655	6.25526	4.73436	1.75464	3.69951	4.6113	4.15749	4.1764	3.48477	0	2.0105	5.01738	2.13657	3.03046	2.66159	3.95704	3.11244	2.65715	2.8561	3.93217	2.51149	1.27561	0	4.1295	4.66062	4.26238	5.20052	2.65481	4.28364	3.40363	3.98631	3.10451	2.07993	1.33694	0	1.60093	2.69475	2.9092	1.05124	3.93303	2.35455	grey	-0.34527	0.103187	0.0767065
Ec-00_006400	Hypothetical protein	Unknown	OG0019678		0	0	3.63064	2.79411	3.49551	4.98949	5.1165	4.62355	2.13694	0	0	0.467569	2.65179	3.78115	2.80596	1.08252	1.8276	0	1.80579	3.63368	3.24242	0	1.53617	5.24664	5.35929	2.43563	5.6648	4.26027	4.42821	4.17649	4.63438	0.848085	2.64277	0.59332	0	0	3.4033	2.9092	0	3.93303	2.35455	grey	-0.111703	0.192557	0.100541
Ec-00_006420	putative kinase wee 1	Cell cycle	OG0002697		7.07143	7.52421	8.50186	8.27461	8.79665	8.38191	9.1058	9.00771	8.25336	8.22562	8.95059	8.9122	9.40389	9.30747	9.27372	9.01823	9.07739	8.86655	8.66315	9.50128	9.21302	8.66529	8.4848	8.38238	8.34578	9.36093	9.82922	8.37054	8.50109	9.38648	9.55692	9.81109	9.87142	9.27282	9.41741	8.6856	9.30985	9.37062	9.44486	9.79117	9.84152	blue	0.586288	0.269888	0.329424
Ec-00_006430	expressed unknown protein	Unknown	OG0000146		3.3074	5.05783	0	0	1.43994	0	1.5762	1.21034	3.48477	1.21055	4.26118	2.66877	2.00709	1.3749	1.73582	2.94606	3.3108	2.65715	2.8561	2.74547	2.51149	2.74071	2.26318	3.04635	2.48435	3.77387	3.34497	2.4701	3.5788	2.1154	2.50821	2.96365	3.04662	2.92852	2.6457	3.48116	3.4033	0	2.07619	1.84612	2.61893	NA	NA	NA	NA
Ec-00_006440	hypothetical protein	Unknown	OG0019679		0	0	3.02081	4.40481	3.25783	4.32529	3.5729	3.35014	0	0	0	0	0	0.845388	1.58388	1.69398	2.60856	0	1.80579	0	0.95637	0	0	0	0	0	0	0	0.752151	0	0	0.485483	0	0.59332	0.460032	1.60093	0	0	0	1.84612	0	NA	NA	NA	NA
Ec-00_006450	hypothetical protein	Unknown	OG0019680		3.3074	3.55699	0	0	0	0	0	0	0	2.30532	2.81935	6.72107	6.93269	6.36226	6.00589	3.46723	2.27029	5.98567	5.73932	4.10158	5.23559	4.56901	4.78677	0	0	0	0	0	0	0	0	3.23284	2.07993	5.59426	2.55641	2.34107	1.24404	0	0	0	0	lightgreen	0.277872	-0.344383	0.0769672
Ec-00_006460	expressed unknown protein	Unknown	OG0000083		6.62786	6.25526	2.39774	3.21885	3.69951	4.42706	3.44747	2.64517	2.13694	2.92054	2.0105	2.7531	2.36515	2.31723	2.93718	1.69398	1.1857	3.83488	1.80579	2.26425	1.93405	3.92695	3.83811	3.26023	4.22703	0	0.904947	3.53546	3.94208	0.874424	1.56257	2.63243	2.07993	2.34191	2.88455	0	3.20345	0	0	0	0	blue	-0.488857	-0.21919	-0.147925
Ec-00_006470	Rad21/Rec8-like protein, C-terminal, eukaryotic	Cell cycle	OG0009071		8.5838	8.3874	8.86543	8.37088	8.8777	7.87009	8.42566	8.78087	8.66922	9.06936	8.81161	8.63779	8.47345	8.27306	8.71605	8.75264	8.36022	8.62125	8.56197	8.95282	8.60509	8.47675	8.31443	7.68393	7.77028	8.87178	8.93413	7.75948	7.7722	8.89093	9.21948	8.63174	9.01643	9.01782	9.08667	8.11655	8.75982	8.99134	8.98925	9.62803	10.0491	grey	0.182691	0.0844462	0.0986555
Ec-00_006480	Hypothetical protein	Unknown	OG0019681		11.5847	11.5062	4.57119	5.19441	5.20847	5.78685	4.51097	4.96441	3.68863	4.90273	5.16334	3.11363	3.62338	6.05166	5.36764	3.14146	3.11244	5.14979	5.95785	3.83937	4.91423	4.94678	4.57306	6.38394	6.32988	3.44923	3.07314	7.01855	6.70501	5.35746	4.27544	4.15399	3.91858	5.3097	4.53349	5.2327	3.5788	3.42868	2.8941	3.80494	3.49645	blue	-0.36566	0.101852	0.100674
Ec-00_006490	Hypothetical protein	Unknown	OG0019682		10.7169	10.7152	3.25392	3.81345	4.18038	4.69528	3.15823	3.15114	0	0	0	0.467569	0.462012	1.76139	2.41371	0	0	0	1.80579	0	2.73173	0	0	1.57547	0.728178	1.07211	0	0.812953	2.53359	1.16987	2.17532	0.848085	2.21144	3.72347	2.13098	4.27056	1.90196	2.0895	1.05124	2.63008	0	pink	-0.523499	0.172677	0.153552
Ec-00_006500	expressed unknown protein	Unknown	OG0000024		7.62055	7.43724	0	3.93041	2.61807	6.27028	5.15713	4.1764	4.02612	4.69882	5.71415	4.62832	4.77728	5.67793	6.00589	4.61309	4.02652	5.56814	4.62726	3.63368	3.72525	1.27561	2.74432	0	0.728178	0	0	0.812953	0	0	0	5.96829	5.55451	4.57847	4.30587	5.69585	2.69475	0	0	0	0	lightgreen	-0.248188	-0.345288	-0.188303
Ec-00_006510	expressed unknown protein	Unknown	OG0019683		0	0	0	0	0	1.30166	0	1.21034	0	0	0	0	0	0.845388	1.22146	0	1.1857	0	0	0	0	0	1.53617	0	0	0	0	0	0	0	0	0	0	0	0	0	0	0	0	0	0	NA	NA	NA	NA
Ec-00_006520	expressed unknown protein	Unknown	OG0008693		4.79178	0	8.42628	8.34478	8.55523	8.34338	8.49862	8.40377	9.49473	9.74023	10.4313	7.10086	6.99805	7.10895	7.45508	9.19371	9.12428	8.89498	8.80275	8.77005	8.58049	7.24438	6.79719	8.67577	7.67152	8.81993	8.46727	8.11101	8.19573	8.42931	8.47338	7.47755	7.5091	7.3512	7.20431	10.0281	9.11352	8.91067	9.1367	9.07208	9.71481	yellow	0.195484	-0.0493043	-0.295385
Ec-00_006530	PDZ domain	Membrane function and transporters	OG0005230		12.0276	11.7422	10.1722	10.3188	10.131	9.49554	10.1328	9.95185	10.633	10.1899	10.2494	9.4038	9.2612	9.13828	9.50286	10.3503	10.0812	10.3764	10.1332	9.98559	10.0187	9.97187	9.60751	9.86278	9.61277	9.33284	9.7699	9.68721	10.023	9.6899	9.80079	9.37306	9.66319	9.12817	9.33842	9.68741	9.30361	9.72994	9.73177	9.94723	10.4458	blue	-0.499651	-0.158003	-0.266874
Ec-00_006540	Transcription initiation Spt4	Transcription	OG0005228		10.9874	10.9374	8.76518	9.0957	8.7855	8.88947	9.05025	8.88478	9.02497	8.82788	8.56853	9.88931	10.0679	10.3806	9.96223	9.35508	9.29208	9.46003	9.57902	8.90496	9.26467	9.92203	10.0413	9.62177	10.0128	9.69998	9.49693	10.1842	9.99522	9.84107	9.63486	9.53742	9.42486	9.76384	9.8414	8.67128	8.88203	8.93966	8.75869	8.53462	9.4113	yellow	0.155886	0.103766	0.386331
Ec-00_006550	conserved unknown protein	Unknown	OG0003686		7.33267	7.24578	9.03941	9.43701	9.1411	7.99134	8.10062	8.94755	7.41713	7.98492	7.74523	7.67693	7.55628	7.36746	7.44132	7.37873	8.06296	7.44983	7.82596	7.58611	7.88902	8.04377	7.66125	7.50151	7.08313	7.95397	7.71396	7.56563	7.53731	8.67262	8.61957	7.25002	7.16014	7.60223	7.51986	7.31835	8.38775	7.96627	8.10596	7.69577	7.82839	greenyellow	-0.561074	-0.256484	-0.407414
Ec-00_006560	conserved unknown protein	Unknown	OG0005229		6.34159	4.49436	7.99866	8.31819	8.56178	8.44998	8.63072	9.00033	8.85009	8.48044	8.54533	8.31435	8.49926	8.04399	7.99838	7.90807	7.926	8.15467	8.18888	8.3028	8.05125	7.84412	7.85131	8.90363	8.44696	7.0997	6.6815	8.46317	9.01583	7.19384	7.16226	8.32663	8.56169	7.72178	7.75373	8.11655	7.5895	8.10068	8.13926	7.98154	8.4584	green	0.060536	-0.199489	-0.132976
Ec-00_006570	Secreted protein similar to EsV-1-163	Unknown	OG0000137		11.9289	11.9211	10.0282	10.2303	10.5457	9.90127	11.0475	10.4284	11.232	10.746	10.5671	12.5656	12.2	12.2961	13.5408	10.8969	11.3689	10.7731	10.6727	14.4231	14.2737	10.684	10.3887	14.2759	13.0995	13.887	14.9467	13.2432	13.5585	14.2187	14.3378	14.8072	14.431	14.2871	13.3478	13.7845	14.33	13.1415	13.8306	14.0138	13.3702	turquoise	0.695511	0.877125	0.785762
Ec-00_006580	Glutathione peroxidase	Redox	OG0008956		6.62786	6.25526	7.76377	8.09208	7.47125	8.04834	7.90575	8.42047	10.1923	9.8796	8.18135	8.2414	8.08555	8.50905	8.3248	8.0303	8.05607	7.42776	7.4776	8.02056	8.1405	7.56981	7.79069	9.12616	8.57666	7.60763	7.90199	8.63505	9.25273	7.90529	7.93336	8.81846	8.5831	9.07745	8.16584	9.01536	9.49636	8.29267	7.84845	8.28142	7.42413	green	0.272259	0.150152	-0.00910299
Ec-00_006590	Secreted protein similar to EsV-1-163	Transposon or viral gene	OG0019684		8.24599	8.0781	5.19303	4.48348	4.31063	4.42706	9.19143	3.15114	2.96284	2.64548	1.33033	13.5682	13.1825	13.3241	14.7316	10.1391	9.85558	7.97611	7.57525	11.9279	13.4966	9.60679	9.5056	12.4002	12.2544	13.108	12.9535	11.8522	11.9033	12.1966	12.5926	12.8557	12.419	13.4471	11.7462	12.1618	12.6033	11.5238	11.5749	11.7405	11.8249	turquoise	0.74175	0.593457	0.775106
Ec-00_006600	hypothetical protein	Unknown	OG0019685		7.07143	7.24578	2.39774	1.75464	1.43994	3.96821	3.68829	1.85911	6.7094	5.91029	5.16334	10.816	10.9691	11.5844	11.1071	10.7454	10.2356	10.3459	10.3251	8.69919	9.58921	9.26415	9.6215	9.86788	10.3656	9.23329	6.99446	9.50687	9.85087	6.33231	6.49959	7.72676	8.12204	9.06654	6.01059	10.2895	8.60616	8.53987	7.59203	7.15426	6.43251	brown	0.740095	0.155937	0.378273
Ec-00_006610	PDZ domain	Membrane function and transporters	OG0000354		6.17389	5.77737	7.48306	6.61987	6.25504	8.22827	8.4215	7.21101	9.19354	9.6249	8.81161	8.29865	7.77593	7.80793	8.0318	9.25834	8.58279	8.95021	8.80275	9.16128	8.95321	7.98834	8.13101	8.47093	8.40006	8.68539	8.56689	8.74601	8.59344	8.52052	8.48444	8.29574	8.4971	8.62849	8.5365	9.42686	8.99082	9.10233	9.15038	9.42241	10.1452	tan	0.681142	0.236766	0.0661468
Ec-00_006620	P-loop containing nucleoside triphosphate hydrolase	Metabolism	OG0001139		6.17389	5.05783	4.94899	5.09769	5.88862	7.3799	8.68035	7.07703	7.18415	7.7497	8.35823	9.56631	9.77906	9.45725	9.80465	9.91362	9.85558	9.92531	9.53843	10.5219	10.281	8.8365	8.87762	8.23529	8.36026	10.0362	10.5502	8.39345	8.47912	9.88305	10.073	10.1173	10.1528	10.0638	9.21803	9.02102	9.01773	10.2589	10.304	10.832	11.203	brown	0.883419	0.324472	0.410436
Ec-00_006625	hypothetical protein	Unknown	OG0019686		0	0	0	0	0	0	0	0	0	0	0	0	0.462012	0	0	0	0	1.86945	1.16871	0.964221	0	5.66491	5.28558	1.57547	0.728178	0	0.522295	0	1.24404	0.502471	0.475874	1.37863	0	0.59332	0.808298	0	0	0	1.65288	1.20016	0	grey	0.226605	-0.179728	-0.105593
Ec-00_006630	WD40/YVTN repeat-like-containing domain	Protein binding or modification	OG0004183		11.5679	11.4573	8.75095	8.25792	8.46018	8.1634	8.56052	8.15384	8.21262	8.08607	8.21851	8.41485	8.79487	8.79956	8.6192	8.23148	8.68909	8.61149	8.69826	8.9417	8.76644	8.28633	8.39807	7.72051	7.36752	7.96991	8.53331	7.65502	7.97808	8.77084	8.7692	8.89683	9.18292	8.60606	8.97374	7.28112	7.36835	8.85089	8.90785	8.92962	8.37146	green	-0.182502	0.0239176	0.212365
Ec-00_006640	RAN binding protein 16-like, protein transporter	Cellular regulation and signalling	OG0004182		9.34581	9.21268	9.37555	9.46636	9.61764	9.31485	9.37702	10.087	8.55002	9.10078	9.30858	10.5752	10.4944	10.4838	10.7317	8.60723	9.83761	9.60965	9.48917	10.0988	10.0134	9.7034	9.53176	8.46555	8.33115	9.75808	10.0304	8.53263	8.34892	10.0121	10.1445	10.6827	10.6259	10.728	10.5452	9.68028	10.5063	9.60883	9.79059	9.56269	9.84152	grey	0.299989	0.0860761	0.31517
Ec-00_006650	Protein of unknown function DUF872, transmembrane	Unknown	OG0008653		7.25074	6.61362	6.50247	6.75287	6.99739	7.16106	7.42985	7.4136	7.76016	7.27397	6.80176	7.76334	8.16169	8.39758	8.14303	7.4634	7.31349	7.81543	7.70173	7.85857	7.78828	7.90526	8.1212	7.87859	8.24323	7.49751	7.69282	8.39669	8.21911	8.00459	7.65715	8.60975	8.61165	8.52869	9.02456	8.07364	7.31974	7.6528	7.88163	7.54353	8.35796	brown	0.76247	0.430091	0.601185
Ec-00_006660	Peptide methionine sulphoxide reductase MrsB	Protein binding or modification	OG0007074		9.77013	9.78808	10.4615	10.5258	9.99718	10.8726	10.5045	10.253	11.0252	10.7799	11.1123	10.3453	10.279	10.4281	10.6776	10.9807	10.6503	10.9334	10.8003	10.166	10.2502	11.0282	11.0484	11.3394	11.3932	10.8707	11.0715	11.086	11.2739	10.6574	10.7173	10.3434	10.3014	10.6674	10.2713	10.4258	11.5247	10.2722	9.87868	10.152	10.1992	purple	0.182714	-0.0745005	-0.347557
Ec-00_006665	lncRNA	Unknown	NA		5.50776	6.76415	5.13578	5.41117	4.99257	5.28885	4.23546	4.54453	3.68863	4.83791	2.0105	6.9257	7.24778	5.86705	6.47412	3.73282	4.58167	3.96316	3.08553	6.96152	6.43593	3.45247	3.63244	8.01001	6.92063	6.22627	5.03762	5.99582	6.56605	5.01113	5.06321	7.2116	7.02811	6.04692	7.40307	7.01238	6.61722	4.99693	5.79928	6.15124	4.94622	turquoise	0.25901	0.65474	0.789869
Ec-00_006670	expressed unknown protein	Unknown	OG0019687		11	11.1844	6.56886	6.72075	7.24557	6.88521	6.29078	6.86574	7.04258	7.76721	6.85935	5.46773	5.81017	6.40358	6.32632	6.34832	5.47057	6.49035	6.38154	6.11838	5.89011	5.854	6.19395	6.39529	5.87716	4.96896	4.51172	5.77434	6.38889	3.99991	3.98631	6.14994	6.05234	5.71095	6.24296	6.46656	6.05946	4.57241	5.05177	4.82022	4.79407	blue	-0.580538	-0.22034	-0.199915
Ec-00_006680	Integrin alpha beta-propellor domain protein	Membrane function and transporters	OG0019688		4.79178	5.05783	3.02081	3.02206	3.25783	3.05756	2.98849	2.64517	3.24728	1.85938	4.26118	5.16321	5.18909	6.15206	2.66159	4.7392	0	1.86945	2.58314	4.32338	4.16411	2.74071	3.1045	4.55112	4.37131	1.40803	1.45678	3.87012	5.46307	1.16987	2.60405	3.70062	5.12486	3.77798	3.70247	3.19117	0	5.68561	5.34608	3.33394	5.43203	turquoise	0.139472	0.151379	0.544626
Ec-00_006690	Mucin	Membrane function and transporters	OG0008533		13.1355	13.1416	11.1822	11.0668	11.4201	10.4989	10.3433	10.8094	10.8649	10.8534	12.2024	10.246	10.8074	10.5435	10.5009	9.94831	10.2507	9.76073	9.70085	10.5349	10.4428	10.0101	10.0849	11.6846	11.2126	10.9597	11.0829	11.2604	11.9286	11.2703	11.125	11.2076	11.2996	10.3241	11.0661	10.895	10.9573	11.1591	11.5668	10.6069	11.5103	blue	-0.238042	0.427979	0.310754
Ec-00_006700	similar to ankyrin 3, epithelial isoform e isoform 19	Membrane function and transporters	OG0019689		6.62786	4.49436	6.89639	7.29025	6.93816	6.47424	7.06375	7.40244	6.07182	6.27103	7.34929	7.27854	7.42618	7.28878	7.47411	5.68084	7.16762	6.20912	6.69132	7.26784	7.41173	7.48079	7.37783	6.78028	6.56812	7.80546	8.02548	6.50874	5.90328	8.61093	8.70851	7.77235	7.75258	7.89827	8.32806	7.20363	8.35797	8.32233	8.31471	7.91329	8.43715	blue	0.44724	0.338906	0.32771
Ec-00_006720	PHD-type zinc finger and ORC2 domain protein	DNA or chromatin modification	OG0019690		5.7655	4.49436	7.88164	7.33336	7.37031	7.79594	8.09541	7.3453	7.79369	7.84349	8.40411	8.24505	8.24841	7.95878	7.94089	7.86029	8.27966	7.49297	7.40509	8.25868	8.25151	7.73288	7.32751	7.60297	7.58043	8.63226	8.57351	7.32129	7.9017	8.6247	8.62672	8.67333	9.03541	8.41502	9.10548	8.66407	8.90692	8.8761	9.01938	8.96751	10.14	blue	0.580671	0.296055	0.25295
Ec-00_006740	expressed unknown protein	Unknown	OG0019691		9.44125	9.38525	9.477	9.51867	9.12348	9.53312	8.89975	8.86051	9.43931	8.93248	9.04875	8.93494	9.07282	9.0672	8.91922	9.1882	8.85714	8.89095	8.85424	8.17095	8.5981	9.09076	9.44001	9.69023	9.97466	8.60801	7.83742	10.2556	9.96491	8.0255	8.03573	8.65483	8.5709	8.88441	8.95857	9.60317	9.0701	8.60767	8.40875	8.57445	9.11474	blue	-0.339775	-0.144193	-0.105204
Ec-00_006750	hypothetical protein	Unknown	OG0019692		6.62786	6.25526	5.89126	5.82779	6.08343	4.77465	5.34471	5.47117	5.26233	5.55456	5.79509	5.22357	4.89176	5.10699	4.90531	4.90983	5.83513	5.03769	5.44081	4.88412	5.40526	6.17093	6.33646	4.66812	5.81121	4.91725	5.09399	5.38776	4.79118	5.29758	5.2075	4.85817	5.07392	5.04654	4.97367	5.51521	5.90328	5.59132	5.98171	4.88501	5.89796	grey	-0.403828	-0.232573	-0.293436
Ec-00_006760	hypothetical protein	Unknown	OG0019693		6.17389	6.25526	7.16315	7.76203	6.97791	7.34131	6.51054	6.55901	7.38816	9.04803	6.07986	6.43228	6.35362	6.19975	6.12768	7.24693	6.90148	6.55286	6.50563	6.48291	6.37185	6.67089	6.66836	7.24949	7.01152	7.92153	7.71695	7.17029	6.94825	6.27913	6.24842	6.20574	5.82479	6.02454	5.78352	7.87553	8.06543	6.01105	5.90633	5.22243	4.99357	grey	-0.34009	-0.157415	-0.504604
Ec-00_006770	Secreted cupin domain and TPR repeat protein	DNA or chromatin modification	OG0003679		8.51527	8.562	9.59586	9.33727	9.05078	9.87675	10.1543	9.82384	10.9566	10.5077	10.9103	10.1647	10.0806	9.93811	10.0368	11.0823	10.1588	11.0427	10.6571	10.4511	10.486	10.3122	10.3153	11.1978	11.0814	10.7609	10.7791	10.9452	10.9838	9.99449	10.0866	10.4442	10.1661	10.0389	9.44099	11.5001	11.1598	9.90917	9.95236	9.76558	9.943	purple	0.472582	0.118432	-0.145548
Ec-00_006780	hypothetical protein	Unknown	OG0000714		7.33267	7.60624	4.57119	4.40481	4.8283	3.66915	3.98766	3.35014	2.96284	3.15146	1.33033	7.22047	6.95041	4.85231	4.7354	3.31352	3.3108	1.21845	2.58314	5.71024	5.1233	1.94186	2.74432	7.31075	6.47536	3.12392	1.45678	6.24648	6.6372	4.99237	4.95831	6.25191	7.18035	6.83206	5.98516	5.75136	4.12294	6.57628	5.5904	7.087	6.72678	turquoise	0.187662	0.596633	0.84711
Ec-00_006790	Amino acid transporter, transmembrane	Membrane function and transporters	OG0003677		14.9539	14.9067	9.03941	9.86751	10.033	9.41113	8.43808	9.04766	8.90225	8.83205	8.96815	8.62666	8.72065	8.50273	8.21754	8.8779	8.73729	8.74688	8.8774	8.83157	8.97764	8.60338	8.55937	9.01275	8.8077	8.29766	8.19613	8.89105	9.04603	8.42407	8.39516	8.6705	8.68985	8.41072	9.13373	8.76192	9.43493	8.92524	8.90785	8.65561	9.00348	green	-0.472492	0.0567613	0.0556679
Ec-00_006800	EsV-1-7 domain protein	Cellular regulation and signalling	OG0019694	EsV-1-7 domain protein	10.1774	10.3127	8.99985	8.15352	8.88817	7.81484	8.14675	8.40377	8.98198	8.55795	8.31772	6.15073	6.1463	5.86705	6.52717	8.41747	7.8642	8.52059	8.32425	7.74164	7.33817	6.91126	6.33646	7.36375	7.02613	7.30475	7.13093	7.35502	7.79016	6.72782	7.05188	6.34715	6.87783	6.03577	6.2783	8.15823	8.19909	6.78236	6.99471	7.00192	6.99454	red	-0.699178	-0.214017	-0.526676
Ec-00_006810	Endonuclease/exonuclease/phosphatase	Unknown	OG0003678		11.5805	11.4738	10.5803	10.4421	10.5993	10.0139	10.148	10.556	9.77208	9.79462	9.88356	9.17358	8.97557	8.82513	9.15656	10.0369	10.32	9.48696	9.49915	9.40944	9.36272	9.5722	9.27724	8.71482	8.34578	9.34023	9.08082	8.57046	8.67782	9.28607	9.2977	9.15147	9.14846	9.25851	8.94764	9.20126	9.83583	9.25621	9.04303	9.69054	9.74798	red	-0.768554	-0.386392	-0.463413
Ec-00_006820	C2H2 zinc finger protein	Transcription	OG0019695	TAP	0	0	1.94355	2.18955	0	3.66915	0	0	0	0	2.0105	0	0	0	0.736313	0	0	0	1.16871	0	0	0	0	0.731276	0.728178	0	0	0	0	0	0	0	0	0.59332	0.460032	0	0	0	0	0	0	NA	NA	NA	NA
Ec-00_006830	hypothetical protein	Unknown	OG0019696		6.62786	7.52421	7.71574	7.7699	7.84896	8.1634	7.51047	7.1589	3.48477	3.95017	3.53633	1.72101	2.00709	0.845388	2.50116	5.68084	5.03863	5.68439	5.73932	5.45271	5.30587	1.94186	2.74432	2.65096	2.09853	0	0	0.812953	1.90196	1.80728	1.11921	1.37863	2.33195	0.59332	2.6457	6.86917	5.52869	4.92144	5.52472	6.15124	6.16938	black	-0.656651	-0.269969	-0.38366
Ec-00_006840	Ribonuclease H-like domain	RNA modification or binding	OG0019697		15.2002	15.2266	10.7896	10.9737	10.9819	10.9376	10.6052	10.3593	10.0118	10.6502	9.86024	9.39316	9.45832	9.67958	9.96416	9.85039	9.21372	10.0425	10.1396	9.64872	9.49081	9.62508	9.66605	10.7185	10.2836	9.53504	9.05028	9.73923	9.92587	8.719	8.48759	9.87641	9.55746	9.48944	10.0843	10.8795	8.95546	8.93966	9.82852	9.2791	9.75658	blue	-0.595184	-0.0529548	-0.0498921
Ec-00_006850	Hypothetical protein	Unknown	OG0019698		4.23263	5.77737	6.20136	6.10163	5.45375	6.61027	5.51068	5.38307	0	1.21055	0	1.10322	1.09247	1.3749	1.41402	5.24357	4.41925	5.68439	5.35542	4.97418	4.95854	0	1.53617	1.21426	0	0	1.66957	1.70947	0.752151	1.96955	0.83311	0.485483	1.38623	1.60163	1.32325	6.76513	5.02138	3.80983	4.55572	4.44377	3.20613	black	-0.51324	-0.133716	-0.27436
Ec-00_006860	expressed unknown protein	Unknown	OG0019699		12.5072	12.6603	7.4125	7.80095	7.49884	7.35429	7.11621	6.97525	7.15004	7.4028	7.20864	6.26285	6.91925	6.91303	6.23361	7.32945	6.29937	7.44983	7.32874	6.21389	6.6127	7.16088	7.39422	7.48034	7.46187	6.80479	6.65051	6.80081	6.78775	6.09793	5.82982	6.48884	6.33068	6.1331	6.7554	7.14265	6.02955	5.20226	5.38362	6.25293	6.28807	blue	-0.54388	-0.137993	-0.127281
Ec-00_006870	Carbamoyltransferase	Metabolism	OG0008218		5.7655	5.05783	9.64798	9.78837	9.83346	9.56137	9.87863	10.5331	8.29298	8.37588	9.31546	8.5477	8.38662	8.48037	8.81962	8.80406	8.49885	8.67376	8.45315	8.86726	8.80942	8.78631	8.65768	8.80913	8.79922	9.28648	9.9378	8.28911	8.30901	9.24901	9.46658	8.42394	8.24801	8.49246	8.19757	9.33446	7.9424	8.70093	9.0134	8.98239	9.70418	green	-0.0804947	-0.154462	-0.256977
Ec-00_006880	expressed unknown protein	Unknown	OG0019700		7.55378	7.43724	7.80108	8.22395	7.89121	8.36277	8.27228	7.63954	9.02967	8.8362	8.7571	7.50518	7.29363	7.48119	7.73984	8.50884	8.3205	8.31354	8.29588	7.89937	7.80051	8.11944	7.87486	8.75064	8.77131	7.83013	7.51156	8.70736	8.87364	7.92025	7.6655	7.64838	7.79775	7.36907	7.83903	9.19627	8.2965	8.45541	8.45797	8.11583	8.89856	yellow	0.0647353	0.0545827	-0.26572
Ec-00_006890	Strawberry notch, helicase C domain	RNA modification or binding	OG0019701		9.66334	9.8228	9.78462	9.62661	9.59545	10.1316	9.35536	9.00033	8.90225	9.1781	9.48055	7.605	7.4575	7.88775	7.5657	8.9579	7.74066	8.7646	8.70259	8.26315	8.39141	8.48249	8.59525	8.23845	7.93028	7.68696	7.46244	7.98739	7.80347	7.22229	7.05612	7.96252	8.05139	7.7183	8.80955	9.45221	8.30277	8.21576	8.8318	7.75763	8.62553	brown	-0.744286	-0.358626	-0.5133
Ec-00_006900	Pectin lyase fold/virulence factor	Cell wall and extracellular	OG0019702		15.6275	15.6851	11.7007	11.7588	12.0052	12.0983	11.267	11.2931	11.8279	12.0872	11.9852	11.1346	11.5954	12.2784	11.9533	11.817	11.515	11.9902	11.9729	11.4109	11.3662	10.8172	11.0315	12.5465	12.2801	12.1986	12.043	11.9617	12.3406	11.4954	11.6021	11.4534	11.2913	11.3896	11.5841	12.0809	10.5622	11.2764	11.4665	11.3357	11.0761	blue	-0.356705	0.101829	0.0947916
Ec-00_006910	Hypothetical protein	Unknown	NA		11.9289	12.1016	7.29974	6.6879	7.30929	7.28821	6.64518	6.63727	6.92647	7.51071	7.36262	6.23379	7.92453	8.38043	7.79062	6.60178	6.45421	7.13269	6.63808	6.74837	5.81979	5.24588	5.28558	7.72502	7.05491	6.44286	6.86546	6.17272	7.13543	6.21584	6.26318	7.99229	7.73356	6.77959	7.40307	6.71015	5.19313	5.49044	6.00598	6.37073	4.73957	blue	-0.356267	0.024579	0.134055
Ec-00_006920	hypothetical protein	Unknown	OG0000154		0	0	1.27694	1.12909	2.61807	2.43173	0.993432	1.21034	0	0	0	0.820122	0	0	0	1.69398	2.27029	1.21845	1.80579	1.53706	1.93405	0	1.53617	0.731276	0	0	0	0	0	0	0	0	0	0	0	2.34107	1.90196	0	1.05124	2.29071	1.02048	NA	NA	NA	NA
Ec-00_006925	lncRNA	Unknown	NA		0	0	1.94355	2.52327	0	1.97463	1.99014	1.21034	0	1.21055	0	0	0	0	0.999185	0	0	1.21845	0	1.53706	0	2.39589	0	2.49076	2.6444	0	1.20709	2.4701	2.35214	0	0.475874	0	1.38623	0.59332	0.808298	0	0	0	1.05124	1.20016	0	NA	NA	NA	NA
Ec-00_006930	expressed unknown protein	Unknown	OG0019703		6.97266	7.1396	4.28557	4.03859	3.25783	3.05756	1.99014	3.35014	2.13694	3.35047	0	4.9295	5.18909	9.18445	8.45096	4.47489	3.48516	0	0	5.13899	5.40526	5.29892	5.7604	3.04635	3.60422	1.90929	0.522295	3.62668	4.55961	0	3.91336	0.485483	1.59332	0	1.08863	0	0	0	1.05124	1.20016	1.02048	darkturquoise	-0.239138	-0.336977	0.0893195
Ec-00_006940	expressed unknown protein	Unknown	OG0002892		10.3148	10.4412	7.14875	6.58461	6.7897	6.1857	6.34455	6.19507	6.48149	6.27103	5.94449	6.10332	6.43769	7.42879	7.01333	7.13665	5.38514	7.29996	7.21215	6.74837	6.57049	7.63314	7.72742	7.26195	7.58537	6.63914	6.82718	7.3683	6.87445	5.49709	5.84951	6.94271	6.87287	6.07984	6.93882	7.14265	4.00492	5.38198	5.9319	5.00647	5.16881	blue	-0.301198	-0.0625635	0.0473255
Ec-00_006950	Peptidase S8/S53 domain	Proteolysis	OG0002894		13.8715	13.7328	10.5311	10.4726	10.6799	10.178	10.3389	10.145	11.3475	11.4642	11.3602	10.0871	10.4188	10.6251	10.175	10.2479	10.2356	10.9768	11.0927	10.7509	10.7139	10.1375	9.93888	9.34551	9.22669	9.13346	9.1389	9.475	9.63691	10.314	10.1569	10.6471	11.0135	9.89064	10.756	9.42686	9.29421	11.4349	11.6203	11.2141	11.796	blue	-0.231276	-0.0992065	0.0230501
Ec-00_006960	Ammonium transporter	Membrane function and transporters	OG0019704		7.9669	8.01942	12.6364	13.8757	13.0101	11.0019	12.2129	13.0757	10.04	9.9193	10.0536	9.86109	9.7471	7.86821	8.49822	12.4462	12.0656	8.69239	8.53795	6.03713	6.33871	13.4818	13.4314	8.251	6.47536	9.8583	10.9371	6.4967	6.34098	8.64886	9.05646	6.63537	6.44199	4.7789	4.97367	3.92919	4.33345	3.80983	3.25979	7.8898	4.79407	turquoise	-0.630143	-0.776299	-0.694684
Ec-00_006970	Ankyrin repeat-containing domain	Membrane function and transporters	OG0019705		5.9841	6.61362	7.77319	7.54075	7.53926	7.90579	7.26304	7.1589	7.37345	7.80161	7.9535	5.71905	6.0261	6.06889	5.91328	7.65159	7.32501	7.44983	7.16273	6.70957	6.78252	5.58175	5.7604	5.86862	4.96353	6.33863	6.26501	5.00131	6.02955	6.05338	6.15658	6.10872	6.24884	5.75238	5.72326	7.07899	7.13543	6.27642	6.30885	5.6528	7.17994	turquoise	-0.551158	-0.482401	-0.718831
Ec-00_006980	Hypothetical protein	Unknown	NA		0	3.55699	1.94355	2.18955	2.14606	0	0	2.30503	0	0	1.33033	0	0	0.845388	0	0	0	0	0	0	0	0	1.53617	0	0.728178	0	0.522295	0	0	0.502471	0	0.848085	0	0	0	0	0	0	0	0	0	NA	NA	NA	NA
Ec-00_006990	Aspartic peptidase	Proteolysis	OG0019706		5.9841	5.462	5.78355	6.10163	6.87639	6.63174	5.89395	6.19507	6.39674	7.13249	6.6577	6.3802	6.39303	6.4171	6.54271	6.60178	6.68621	6.18301	6.98935	6.98337	6.95646	6.4542	6.40277	6.65358	6.00064	7.0997	7.7813	5.69226	6.14565	7.26591	7.43082	6.72539	6.95961	6.15386	6.97373	6.89405	6.76977	6.42048	6.7436	6.74695	7.00613	blue	0.4282	0.247138	0.0683748
Ec-00_007000	Protein-tyrosine phosphatase-like	Cellular regulation and signalling	OG0008279		7.07143	7.95827	7.74475	7.72203	8.38824	7.0696	6.98694	7.2979	7.56685	7.48976	6.96807	7.30322	7.04829	7.6162	7.635	8.45931	8.43652	8.86244	8.74936	9.38912	9.38115	6.40666	6.15601	6.58579	6.12799	8.30773	8.22587	6.1575	6.93217	7.721	7.72799	7.39766	7.58079	7.52862	6.4368	7.42462	9.41192	8.15113	8.17182	8.27539	8.82521	black	0.0708167	0.0687203	-0.0666314
Ec-00_007010	hypothetical protein	Unknown	OG0019707		5.50776	6.03601	1.27694	3.392	2.97312	1.30166	2.31141	0	1.4325	0	2.0105	1.72101	1.52973	0	2.41371	2.12208	0	0	1.80579	1.53706	1.52649	0	0	1.86411	2.91943	2.57562	1.45678	1.70947	1.61018	1.62442	1.56257	1.58509	1.14434	2.18935	2.55641	0	0	0	1.65288	1.20016	0	blue	-0.373592	0.183377	0.21094
Ec-00_007020	Zinc finger, RING/FYVE/PHD-type	Cellular regulation and signalling	OG0019708		6.17389	3.55699	3.25392	3.68618	3.49551	3.96821	2.98849	2.64517	3.86722	4.06791	3.71335	2.38144	2.73594	2.53119	2.5836	2.94606	2.27029	3.538	3.28344	1.94599	2.73173	0	0	3.75937	3.43938	1.07211	1.85496	3.09897	3.94208	1.96955	1.74182	2.43312	2.81809	2.34191	2.35932	4.10995	1.24404	2.9092	3.67755	2.90463	3.20613	blue	-0.376415	0.0769491	0.0124488
Ec-00_007030	Sphingosine-1-phosphate phosphatase	Metabolism	OG0019709		4.23263	3.55699	5.3523	4.82303	4.64289	5.53665	6.6874	4.54453	6.8647	6.72983	6.23296	5.4552	5.12811	5.53651	4.96805	5.77219	4.50275	5.72114	6.04224	6.21389	6.00018	5.53829	5.81011	6.43985	6.53786	5.32693	5.49378	6.55592	6.53444	5.62439	5.33867	5.57913	5.924	5.62433	6.7301	7.49136	5.57084	6.21451	5.98171	5.95396	5.99422	green	0.445166	0.25883	0.0608564
Ec-00_007040	tRNA Ile	Protein synthesis	NA		0	0	0	0	0	0	0	0	0	0	0	0	0	0	0	1.08252	0	0	0	0	0	0	0	0	0	0	0	0	0	0	0	0	0	0	0	0	0	0	0	0	0	NA	NA	NA	NA
Ec-00_007050	Dolichyl-diphosphooligosaccharide--protein glycosyltransferase subunit STT3A, N-terminal fragment, family GT66	Metabolism	OG0005838		8.3676	7.8944	8.39612	8.46113	8.73419	8.0721	9.06901	9.50961	8.48309	8.57297	9.91106	9.98723	10.0283	10.2881	10.2577	8.19342	9.75913	8.93464	8.9374	9.59651	9.28438	9.17119	9.23236	9.59862	9.34064	9.14614	10.458	8.99314	9.6005	10.6916	10.9757	10.388	10.6093	10.2289	10.4036	8.58224	8.75982	10.5322	10.4691	10.9158	10.5981	brown	0.68029	0.388592	0.579099
Ec-00_007060	Dolichyl-diphosphooligosaccharide--protein glycosyltransferase subunit STT3A, C-terminal fragment, family GT66	Metabolism	OG0019710		8.54994	8.60253	7.87291	8.27461	8.24895	7.84273	8.62711	9.00771	8.42722	8.42083	9.44023	9.39644	9.3689	10.0518	9.90225	8.80044	9.54934	9.12496	8.98792	9.12242	9.08396	9.60153	9.60751	10.0306	9.88334	9.59592	10.0916	9.67657	9.99231	10.3809	10.4507	9.62335	9.63565	9.85383	9.97769	9.41402	9.46876	10.0989	10.116	10.3033	9.83829	brown	0.832425	0.536097	0.60597
Ec-00_007070	Hypothetical protein	Unknown	NA		0	0	0	0	0	0	0.993432	0	0	0	0	0	0	0	0	0	0	0	0	0	0	0	0	0	0	0	0	0	0	0.502471	0	0	0	0.59332	0	0	0	0	0	0	0	NA	NA	NA	NA
Ec-00_007080	Harbinger transposase-derived nuclease domain	Transposon or viral gene	OG0019711		4.23263	0	0	0	0	0	0.993432	0	0	0	0	1.33977	0.462012	2.31723	0.736313	0	0	0	0	0	0.95637	4.28341	3.63244	5.08769	3.82078	0	0	0	0	0	0	1.13761	0.853573	0.59332	0.460032	0	0	0	1.05124	0	0	NA	NA	NA	NA
Ec-00_007090	expressed unknown protein	Unknown	OG0019712		0	0	0	0	0	0	0	0	0	0	0	0	0	0	0	0	0	0	0	0	0.95637	0	0	0	0	0	0	0	0	0	0	0	0	0	0	0	0	0	0	1.20016	0	NA	NA	NA	NA
Ec-00_007095	lncRNA	Unknown	NA		0	3.55699	1.27694	0	0	2.43173	0.993432	0	0	0	0	0.467569	0	0	0.41463	0	2.88239	0	1.16871	0.964221	0	4.38502	4.3221	5.22133	3.68008	0.633432	0	4.14157	3.20346	0	0	1.13761	0.489014	1.60163	0.808298	0	0	0	0	1.20016	0	NA	NA	NA	NA
Ec-00_007097	lncRNA	Unknown	NA		0	0	0	0	0	2.43173	3.31008	0	0	0	2.0105	4.58296	4.2281	5.51153	5.71722	0	0	1.21845	0	0.964221	3.61883	4.65289	5.41972	3.53128	4.50246	4.0387	1.20709	1.70947	2.69475	0.502471	1.56257	0.485483	0	0.59332	0	0	0	0	0	0	0	darkred	0.215063	-0.221809	0.140521
Ec-00_007098	lncRNA	Unknown	NA		0	0	0	0	0	0	0	0	0	0	0	4.38574	4.39269	6.2759	5.80575	0	0	1.21845	1.16871	1.53706	2.51149	0	2.26318	2.49076	3.34931	4.5941	2.53571	2.00978	1.24404	0	1.11921	0	0	0	0	0	1.90196	0	0	2.63008	1.02048	darkred	0.361124	-0.00031051	0.369163
Ec-00_007099	hypothetical protein	Unknown	OG0000134		0	0	0	0	1.43994	0	0	0	0	0	0	2.83278	1.09247	3.1647	2.87306	0	0	0	0	0	0	0	0	2.65096	3.03949	0	0	1.70947	0	0	0.475874	0	0.489014	1.01252	0	0	0	0	0	0	0	NA	NA	NA	NA
Ec-00_007100	expressed unknown protein	Unknown	OG0019713		0	0	1.27694	1.12909	2.61807	2.43173	2.31141	0	0	0	0	0	0.462012	0.845388	0.736313	0	0	0	0	0	0	1.27561	1.53617	0.731276	0.728178	0	0	0.812953	0	0	0	0	0	0	0	0	0	0	0	0	0	NA	NA	NA	NA
Ec-00_007110	Proline-rich protein	Unknown	OG0019714		12.3829	12.2333	3.45454	7.90466	7.39988	5.11678	4.94146	6.38849	2.13694	3.15146	4.56798	7.03501	6.09145	2.06591	11.3056	6.80292	6.09932	9.71591	10.6301	15.4816	15.0181	1.27561	1.53617	14.5621	13.8285	15.6159	16.4996	13.6314	13.9559	15.4857	15.8052	15.6016	15.0917	15.0632	13.9392	15.0399	15.6159	14.7558	15.2784	15.7279	15.7185	salmon	0.476331	0.933175	0.696086
Ec-00_007120	IQ calmodulin-binding motif family protein	Cellular regulation and signalling	OG0019715		0	0	0	0	0	0	0	0	0	0	0	0	0	0	0	0	0	0	0	0	0.95637	0	0	0	0	0	0	0	0	0	0	0	0	0	0	0	0	1.39397	0	0	0	NA	NA	NA	NA
Ec-00_007130	DNA helicase Pif1-like	DNA or chromatin modification	OG0019716		7.91465	7.34468	1.94355	2.18955	3.69951	3.96821	2.31141	3.15114	1.4325	1.85938	2.47088	5.14771	4.99783	3.93936	6.21433	2.45179	0	3.69406	4.20738	8.29844	8.03583	3.01882	1.53617	6.22751	6.26977	7.01616	7.5355	4.81992	4.55961	6.40504	6.81708	9.11654	7.65197	8.06649	8.17149	10.1153	7.65953	4.92144	6.09919	6.01313	4.99357	salmon	0.425384	0.838067	0.738156
Ec-00_007140	Major facilitator superfamily	Membrane function and transporters	OG0019717		9.66334	9.47531	8.98777	7.80861	7.85964	8.34338	8.36625	8.01418	8.68122	8.86901	7.82449	7.4899	7.20782	7.44207	7.68954	6.75893	7.14181	5.14979	6.22184	6.543	7.14081	6.65062	6.49683	8.45474	7.77461	7.54513	7.26382	8.39669	8.44836	8.36513	8.27655	6.97976	7.58988	7.55618	7.78601	6.1733	7.72632	8.12613	7.26996	8.0608	7.66252	pink	-0.424341	0.154114	0.100407
Ec-00_007150	expressed unknown protein	Unknown	OG0007586		12.117	12.174	12.1434	11.6627	11.0673	12.3112	11.7071	11.1182	12.7936	12.5716	12.585	9.39151	9.68097	10.4579	9.88711	11.2151	10.2791	11.6235	11.4143	10.09	10.2107	11.5748	11.689	12.3749	11.7097	9.60002	9.32606	11.5381	11.6811	8.82618	9.06385	10.8524	10.6413	9.12555	10.4473	10.7829	9.46318	8.77785	9.02235	9.34103	8.57972	turquoise	-0.572465	-0.429527	-0.554078
Ec-00_007160	Domain of unknown function DUF4414	Unknown	OG0019718		9.1563	9.1319	10.3161	10.1899	10.4359	10.6876	10.6725	10.8376	11.4101	11.7659	11.744	10.4642	10.2213	10.5927	10.6401	11.6895	10.8686	11.2249	11.1501	10.7824	10.6862	11.0545	11.0766	11.6993	11.5079	11.2645	10.8274	11.5761	11.9442	10.9988	11.0424	10.5771	10.5316	10.4253	10.6662	12.0306	11.3167	11.2506	11.5815	11.3109	12.3301	green	0.445154	0.144774	-0.0934326
Ec-00_007170	hypothetical protein	Unknown	OG0019719		0	0	1.27694	0	0	1.97463	4.15749	0	0	0	0	7.57924	7.38116	7.62787	8.16997	1.69398	2.27029	3.16378	1.16871	5.6294	7.50431	1.94186	2.26318	3.15725	4.0667	6.31884	4.85396	3.43809	2.14454	0.502471	3.14	1.37863	0	0	0	0	0	0	1.05124	0	0	darkred	0.26988	-0.104103	0.247029
Ec-00_007180	conserved unknown protein	Unknown	OG0000300		0	0	0	2.18955	0	0	0	0	0	1.21055	0	0.820122	0.462012	0.845388	1.58388	0	0	0	0	0	0	1.27561	0	0.731276	0	0	0	0	0	0	0	0	0	0	0	0	0	0	0	0	0	NA	NA	NA	NA
Ec-00_007190	Hypothetical protein	Unknown	OG0019720		10.4216	10.8643	5.19303	6.7369	5.66333	5.23374	4.74221	3.52499	2.6082	2.92054	0	0	1.70698	0	0	1.08252	0	2.3164	0	0.964221	1.52649	0	0	2.65096	1.85845	2.28059	0	0.812953	2.35214	0.874424	1.90123	0	0	0.59332	0.460032	0	3.20345	2.0895	1.65288	1.20016	0	red	-0.773601	-0.071675	-0.169319
Ec-00_007200	Hypothetical protein	Unknown	NA		0	0	0	0	0	0	0	0	0	0	0	0	0	0	0	0	0	0	0	0	0	0	0	0	0	0	0	0	0	0	0	0	0	0	0	0	0	0	0	0	0	NA	NA	NA	NA
Ec-00_007210	hypothetical protein	Unknown	OG0019721		3.3074	0	4.05795	3.54657	3.87821	3.49261	1.5762	2.30503	2.96284	1.21055	2.0105	3.88557	3.93956	6.40358	6.46327	4.23908	5.92867	3.83488	3.28344	4.45432	4.30804	4.56901	4.97287	1.21426	1.20982	1.90929	0.522295	0	0	0.502471	1.11921	0	0	2.18935	0.808298	5.38086	7.62993	1.39397	1.05124	0	2.03061	grey	-0.117838	-0.501797	-0.338131
Ec-00_007220	expressed unknown protein	Unknown	OG0000543		0	0	4.48212	3.93041	3.25783	2.77832	2.98849	3.35014	2.6082	0	0	0	0.462012	0	0.736313	0	0	1.86945	1.16871	0	0	0	1.53617	0	0	0	0	1.32976	0	0	0	0	0	0	0	0	0	0	0	0	1.02048	NA	NA	NA	NA
Ec-00_007230	hypothetical protein	Unknown	OG0019722		7.16386	7.1396	0	0	1.43994	0	0	0	0	0	0	0	0	0	0	0	0	0	0	0.964221	0	0	0	0	1.20982	0	0	0	0.752151	0	0	0	0.489014	0.59332	1.70196	0	0	1.39397	1.05124	1.84612	1.02048	green	-0.251284	0.222983	0.279158
Ec-00_007240	Hypothetical protein	Unknown	OG0019723		4.23263	5.05783	6.30886	6.88916	6.8337	7.2047	6.67346	7.22375	7.4314	7.51071	6.6577	6.31926	6.22848	6.87437	6.81003	6.2669	5.47057	6.37975	6.17277	6.2683	6.4822	5.53829	5.94971	7.41488	7.54029	7.23783	6.88156	7.09242	7.15634	6.60353	6.54256	7.05113	6.8975	7.08003	7.18209	7.66039	6.95622	6.57628	5.74262	6.15124	6.08446	green	0.106625	0.223209	-0.000967746
Ec-00_007245	lncRNA	Unknown	NA		6.62786	6.03601	8.32747	9.09257	8.99859	9.70757	8.79744	9.30905	8.196	8.49628	8.56277	7.45256	7.65685	7.7663	7.72403	6.92737	7.01957	7.81543	7.76931	7.56453	7.30424	6.40666	6.98203	7.8664	7.29699	7.99507	8.39245	6.6994	6.94825	7.97144	7.85517	8.2939	7.75258	7.72871	8.31451	8.29527	7.70755	6.84499	7.30951	6.84792	6.6101	grey	-0.447732	-0.205037	-0.399733
Ec-00_007250	Carbohydrate-binding WSC, subgroup	Cell wall and extracellular	OG0000000		0	0	4.57119	4.48348	5.71129	6.35018	6.72843	6.55901	9.12495	8.92859	11.8939	11.2709	12.23	10.5226	10.1208	12.0584	11.7837	12.8611	12.2452	8.25419	8.39141	12.7202	12.814	2.31053	4.17554	4.94334	3.07314	4.52025	4.95927	3.34569	3.14	5.17811	4.53554	4.57847	2.46123	5.4496	4.51713	4.84177	4.09462	3.66436	3.35858	lightyellow	0.129388	-0.750418	-0.486408
Ec-00_007260	hypothetical protein	Unknown	OG0019724		0	3.55699	1.94355	1.75464	2.61807	0	0	1.21034	1.4325	0	0	0.467569	1.3276	2.06591	1.22146	0	0	1.21845	0	1.53706	0	2.39589	3.39248	3.35635	2.3043	0.633432	0	3.09897	3.4033	0.502471	0.475874	2.07054	2.33195	2.18935	1.70196	1.60093	1.24404	1.39397	0	0	1.02048	NA	NA	NA	NA
Ec-00_007270	Unsaturated glucuronyl hydrolase, family GH88	Metabolism	OG0000188		0	0	1.27694	1.75464	0	1.30166	0.993432	1.85911	0	0	2.47088	1.33977	2.13657	0.845388	0.41463	0	0	1.21845	0	0.964221	1.52649	1.94186	0	1.86411	0.728178	1.07211	0.522295	1.32976	1.61018	2.1154	1.35786	2.72263	3.99358	0	3.47774	3.48116	2.97141	2.5568	2.66937	1.20016	1.6122	NA	NA	NA	NA
Ec-00_007280	expressed unknown protein	Unknown	OG0019725		4.23263	5.462	5.01398	4.82303	5.39623	6.47424	6.17684	5.02389	6.42555	6.38885	6.26173	6.07902	6.22848	7.0054	6.66609	6.90063	5.42849	6.98938	6.74267	6.64249	6.81903	6.11287	6.58514	7.66997	7.21648	6.22627	5.65234	7.1004	7.38026	6.37639	6.0753	7.01589	6.89261	6.53245	7.04931	7.81168	5.9359	6.36457	6.43936	6.47963	6.62521	tan	0.684431	0.353918	0.349581
Ec-00_007290	expressed unknown protein	Unknown	OG0019726		5.19374	5.462	5.49572	7.10359	6.28705	6.35018	6.36203	6.31896	5.05675	6.61846	3.871	2.7531	3.90362	1.3749	2.87306	3.73282	2.27029	3.83488	3.45744	5.09952	4.61533	3.45247	2.74432	5.24664	3.34931	2.28059	1.66957	3.94292	4.89437	1.16987	1.11921	4.01811	4.58488	2.82875	2.80924	5.69585	4.33345	4.11103	4.18244	3.66436	5.43203	brown	-0.659135	-0.127402	-0.262758
Ec-00_007300	Peptidase M14, carboxypeptidase A	Proteolysis	OG0019727		4.79178	6.03601	0	1.12909	2.61807	0	1.99014	1.85911	4.29944	5.02424	4.01311	5.89639	6.00929	4.5913	4.69887	4.79835	1.8276	3.83488	4.39023	5.92869	5.66796	3.78545	3.83811	5.96324	6.18117	5.87974	5.58838	5.96119	6.27876	5.84957	5.81987	5.27072	6.02578	6.31001	5.81273	7.45838	5.02138	5.89744	6.55904	6.06997	6.32556	brown	0.763377	0.694099	0.723189
Ec-00_007310	Sodium/potassium/calcium exchanger	Membrane function and transporters	OG0008541		7.33267	7.43724	2.74265	4.23329	4.18038	3.66915	1.5762	3.52499	0	1.21055	2.0105	8.40185	8.25556	7.0922	7.81856	4.0573	3.78108	3.96316	3.99795	8.77632	8.42733	2.74071	3.83811	6.47239	6.62681	6.88099	6.36002	6.48456	6.86601	7.46615	7.4695	7.93448	8.92837	8.54056	8.68475	6.59349	4.89436	7.99417	8.17717	9.69506	9.8512	turquoise	0.558308	0.704552	0.946829
Ec-00_007320	ICln	Membrane function and transporters	OG0008542		15.1087	15.138	9.57178	9.97523	10.142	9.4235	9.012	9.27273	7.8047	8.04358	7.79528	8.82843	9.1186	8.9947	8.6802	8.23683	8.75016	7.95312	8.36851	8.46689	8.6224	8.85875	9.06842	8.37379	8.39444	8.46679	8.49718	8.52376	8.29336	8.7332	8.69224	8.32663	8.46616	8.69906	9.18583	7.82468	7.80788	8.36569	8.37186	8.33458	8.25485	green	-0.522122	-0.0323181	0.0906843
Ec-00_007330	DNA-directed RNA polymerase, RBP11-like dimerisation domain	Transcription	OG0008543		11.1656	11.5638	9.6038	9.95466	9.82531	9.81003	9.28835	9.30006	9.76083	9.74687	9.15989	10.0222	10.1119	10.3545	10.0823	9.50908	9.35522	9.65309	9.92114	9.32425	9.71561	10.2258	10.3867	10.1043	10.4668	9.19852	9.05502	10.8538	10.4947	9.77263	9.63486	9.61159	9.56747	10.3138	10.0577	9.588	8.96734	9.4567	9.38596	9.25785	7.82185	yellow	-0.17288	-0.0182117	0.167148
Ec-00_007340	Novel Sm-like protein with long N- and C-terminal domains.	RNA modification or binding	OG0008544		10.1208	9.87337	10.7768	11.4709	10.9782	11.8147	11.618	10.9814	11.7425	11.5746	11.398	11.1793	11.2248	11.4837	11.3711	12.0428	11.456	11.9636	11.8235	11.4094	11.4827	11.905	11.8259	12.8409	12.8454	12.3551	12.0358	12.9545	12.9541	11.9844	11.8822	11.3341	11.4161	11.4491	11.4851	12.5125	11.8309	11.1642	11.0527	11.1398	10.6544	purple	0.350183	0.216777	-0.0324155
Ec-00_007350	UbiA prenyltransferase family	Metabolism	OG0008545		5.7655	3.55699	7.27343	7.43584	7.21262	7.73771	8.09541	7.78415	6.98569	6.91406	6.98541	8.05256	7.71503	7.53176	8.08937	7.49949	7.71464	7.60538	7.818	7.75441	7.86594	7.71347	7.60603	7.88666	8.0813	7.44827	7.46601	8.31334	8.3059	7.82804	7.87692	8.18903	8.219	7.94071	7.70003	8.0517	8.28389	7.8284	7.8145	7.92874	7.92314	blue	0.461315	0.172114	0.161046
Ec-00_007360	4-hydroxybenzoate nonaprenyltransferase	Metabolism	OG0019728		0	3.55699	0	0	0	2.43173	2.31141	0	4.63157	3.52533	2.81935	2.48371	4.07497	3.40067	2.32062	2.71999	3.78108	4.63722	4.8927	1.94599	0.95637	3.62854	3.1045	0	1.20982	0	0	0	0	0	0	0.848085	0	0.59332	0	1.60093	0	0	0	0	0	NA	NA	NA	NA
Ec-00_007370	expressed unknown protein	Unknown	OG0000060		0	0	1.27694	1.12909	1.43994	1.30166	0.993432	1.21034	4.29944	4.96477	4.47278	4.43763	5.1436	5.86705	4.19486	6.32839	5.19742	5.60794	6.29246	3.10569	2.92276	6.25386	4.17809	3.26023	3.25325	0	0	2.81853	4.06514	1.41498	1.90123	2.72263	1.77438	0.59332	0.460032	0	0	0	1.65288	0	0	lightyellow	0.191502	-0.600278	-0.332801
Ec-00_007380	conserved unknown protein	Unknown	OG0000060		8.15883	7.95827	10.5708	8.83195	9.03674	10.072	10.5328	10.5685	10.1324	10.2673	10.6401	8.77774	9.16487	9.11359	9.09553	9.90524	10.5161	10.1989	9.85268	9.38297	9.18532	9.52289	9.08366	8.83021	7.49375	9.74052	10.412	7.36168	8.78689	9.29663	9.61127	8.90167	8.881	8.30097	8.51147	8.57457	10.2353	8.96338	8.28029	9.28211	9.572	turquoise	-0.235061	-0.537792	-0.713858
Ec-00_007390	Molybdenum cofactor sulfurase, C-terminal	Metabolism	OG0008724		6.49182	6.61362	8.91307	8.77834	9.00822	8.35634	8.23481	8.36405	8.75115	8.8237	7.72472	7.11686	7.27265	6.9783	7.2714	7.21472	8.35461	7.17305	7.42619	7.49778	7.66669	6.82349	6.66836	7.58324	7.11764	8.032	8.05891	7.51877	7.44401	8.11711	8.13933	7.18408	7.08496	7.07459	6.84296	7.96043	8.46242	7.5687	7.37621	7.36198	7.64037	yellow	-0.494926	-0.186682	-0.52639
Ec-00_007410	Cellulose/chitin-binding protein	Cell wall and extracellular	OG0019729		15.018	14.9357	6.67314	8.74679	10.5157	8.92469	7.8261	8.87674	7.0793	6.03119	6.49764	8.01035	8.44404	8.42793	8.3248	6.85956	6.78956	7.03389	7.01742	7.92218	8.04099	6.28048	5.7604	8.80913	8.46851	7.99818	7.73479	8.60171	8.55195	8.85762	8.75361	8.77433	9.06506	9.08423	9.11626	7.16327	7.4269	8.99134	8.74433	8.6968	8.77528	pink	-0.271581	0.366769	0.452099
Ec-00_007400	Hypothetical protein	Unknown	NA		0	0	0	2.79411	0	0	1.99014	0	0	0	0	0	0	0	0	0	0	0	0	0	0	0	0	0	0	0	0	0	0	0	0	0	0	0	0	0	0	0	0	0	0	NA	NA	NA	NA
Ec-00_007420	expressed unknown protein	Unknown	OG0019730		0	0	3.25392	1.75464	2.61807	2.43173	0	2.64517	0	1.21055	0	0.467569	0.462012	0	0.736313	0	0	2.93259	1.80579	1.53706	0.95637	0	0	4.81067	5.66952	1.40803	2.64036	6.50874	6.97988	5.44285	5.14515	1.13761	0	0	1.08863	3.19117	1.90196	6.69438	6.9072	6.06997	6.01731	lightgreen	0.211552	0.5356	0.351328
Ec-00_007430	expressed unknown protein	Unknown	OG0019731		8.3676	8.29148	8.79784	9.53953	8.56178	8.59369	8.88471	8.64542	8.46239	8.72857	10.1851	8.10565	8.4362	9.32729	8.96608	7.56908	7.926	10.1809	10.0336	9.39116	9.15708	7.56981	7.90947	3.15725	3.82078	0	0.904947	3.87012	2.53359	2.24785	2.29502	8.50084	8.79974	9.55823	8.81076	8.07364	7.95836	6.01105	5.52472	2.90463	2.61893	lightgreen	-0.328344	-0.538004	-0.369559
Ec-00_007440	Hypothetical protein	Unknown	OG0019732		6.49182	5.77737	3.02081	3.21885	4.18038	3.49261	3.5729	3.35014	4.02612	5.51364	5.53724	3.45315	3.48433	3.1647	3.54283	4.67752	3.48516	3.83488	4.3017	3.3937	3.3791	4.47995	4.88282	3.89358	4.22703	3.29572	3.34497	4.14157	4.42821	3.01486	3.57789	3.94504	3.52238	3.8812	4.30587	5.63811	4.23203	2.9092	2.8941	2.90463	2.84228	blue	-0.198578	-0.0772856	-0.222229
Ec-00_007450	expressed unknown protein	Unknown	OG0019733		0	0	0	0	0	0	0	0	0	0	0	0	0	0	0.41463	1.69398	0	0	0	0	0	1.27561	2.26318	0	1.57029	2.28059	0.904947	0	0.752151	0	0	0.485483	0	0	0	0	0	0	0	0	0	NA	NA	NA	NA
Ec-00_007460	Nucleotide-diphospho-sugar transferase	Metabolism	OG0019734		0	0	3.45454	0	1.43994	4.92137	7.59423	1.21034	4.72722	4.46128	3.09981	10.7822	10.4252	10.1081	10.412	4.0573	2.88239	5.44171	4.69834	7.10795	9.36272	5.53829	6.077	8.2416	9.37385	8.53699	7.15762	7.62214	7.09267	0	4.56463	3.60899	2.54642	1.01252	0.460032	0	0	1.39397	0	1.20016	2.03061	darkred	0.239422	-0.19601	0.10987
Ec-00_007470	Hypothetical protein	Unknown	OG0019735		0	0	0	0	0	0	0	0	0	0	0	0	0	0	0	1.69398	0	0	1.16871	1.94599	2.25147	0	0	0	0	0	0	0	0	0	0	0	0	0	0	0	0	0	0	0	1.02048	NA	NA	NA	NA
Ec-00_007480	Glycosyltransferase, family GT4	Metabolism	OG0004205		9.42266	9.45332	8.51875	8.28013	7.99173	8.31047	8.17176	7.79272	10.8032	10.5437	8.71092	8.27922	8.03038	7.30341	7.39356	8.23148	9.10437	7.40535	7.38369	8.12746	8.08662	7.87937	8.25285	6.55574	6.44307	8.90202	9.62838	7.7894	7.17696	7.96905	7.98767	8.16309	8.00229	8.39772	7.74366	7.75848	9.53413	7.50548	7.5759	7.80862	7.39798	grey	-0.29769	-0.224294	-0.443961
Ec-00_007490	tRNA Gly	Protein synthesis	NA		0	0	0	1.12909	1.43994	0	0	1.21034	0	0	0	0	0	0	0	0	0	0	0	0	0	0	0	0	0	0	0	0	0	0	0	0	0	0	0	0	0	0	0	0	0	NA	NA	NA	NA
Ec-00_007500	tRNA Gly	Protein synthesis	NA		0	0	1.94355	1.12909	1.43994	1.30166	0.993432	1.21034	0	0	0	0	0	0	0	0	0	1.21845	0	0	0	0	0	0	0	0	0	0	0	0	0	0	0	0	0	0	0	0	0	0	0	NA	NA	NA	NA
Ec-00_007510	tRNA Gly	Protein synthesis	NA		0	0	1.27694	2.18955	0	0	1.5762	1.21034	0	0	0	0	0	0	0	0	0	0	0	0	0	0	0	0	0.728178	0	0	0	0	0	0	0	0	0	0	0	0	0	0	0	0	NA	NA	NA	NA
Ec-00_007520	tRNA Gly	Protein synthesis	NA		0	0	1.94355	2.52327	2.97312	0	1.5762	0	0	0	0	0	0	0	0	0	0	0	0	0	0	0	0	0	0	0	0	0	0	0	0	0	0	0	0	0	0	0	0	0	0	NA	NA	NA	NA
Ec-00_007530	Hypothetical protein	Unknown	OG0019736		6.97266	6.76415	5.13578	4.8823	5.45375	7.13121	5.96432	6.22071	6.14292	6.61846	5.67192	7.24252	7.24419	6.5701	6.40778	6.65074	5.55122	6.59307	6.17277	6.35466	6.23445	6.33228	6.40277	6.71832	7.22284	6.54859	5.71359	6.54427	6.73312	5.77469	5.44602	6.74166	7.23547	6.87646	6.72499	6.46656	4.89436	6.33578	6.09919	6.50046	6.10616	greenyellow	0.331852	0.156011	0.47649
Ec-00_007540	Hypothetical protein	Unknown	OG0019737		4.79178	5.77737	6.63233	6.12636	5.75771	6.12642	6.23494	6.08768	5.69973	5.91029	5.62841	6.08717	5.95765	5.46023	5.85638	6.38737	5.42849	6.28473	6.01465	5.88293	6.00018	6.3575	6.91546	5.14264	5.90903	5.76743	5.80648	6.02964	5.50715	5.51034	5.53382	6.10872	6.14574	6.04692	6.45545	6.00079	5.72811	5.49044	6.22861	5.79446	4.49828	grey	-0.122812	-0.319984	-0.308117
Ec-00_007550	Hypothetical protein	Unknown	OG0019738		6.62786	6.25526	7.28664	7.03994	6.69746	6.90299	6.70121	6.29502	7.09731	7.59157	8.09608	7.38479	7.38768	7.1006	6.67552	4.32204	7.14181	7.22516	7.36196	5.83566	6.19795	5.95659	6.58514	3.35635	3.60422	3.29572	2.73792	3.43809	3.30684	3.79865	3.91336	4.54863	5.34133	6.07984	5.90605	4.10995	3.87637	5.54176	4.55572	5.36553	5.68372	salmon	-0.403785	-0.757181	-0.43256
Ec-00_007560	MULE transposase domain	Transposon or viral gene	OG0019739		5.7655	6.90045	4.28557	3.21885	1.43994	3.82641	4.23546	4.06756	5.05675	5.63307	5.16334	5.69792	5.75073	5.99872	5.88917	5.64905	5.42849	5.89206	5.89872	4.51559	4.66965	5.01177	5.41972	3.82804	3.82078	3.65263	3.28166	4.14157	3.87637	2.8579	3.37549	4.49844	4.1977	5.36417	4.66745	5.4496	4.42821	1.39397	3.0885	1.84612	3.20613	lightgreen	0.0383751	-0.379225	-0.185601
Ec-00_007570	Hypothetical protein	Unknown	OG0019740		3.3074	0	4.05795	4.48348	2.14606	5.53665	3.31008	4.1764	0	1.21055	0	0.467569	0	0	0.41463	5.4045	4.13517	4.9782	4.55249	4.10158	4.55889	0	1.53617	0	0	0	0	0	0	0	0	0	0	0	0	5.06756	3.73524	3.1922	1.05124	1.20016	2.35455	black	-0.403024	-0.285297	-0.445551
Ec-00_007580	hypothetical protein	Unknown	OG0000052		7.48378	7.7575	4.65508	5.14686	6.11943	3.82641	3.15823	4.76969	0	1.21055	2.47088	3.95843	4.51682	4.89156	5.20787	1.69398	1.1857	0	0	3.51868	3.91708	3.01882	1.53617	6.16252	5.21374	2.10685	2.91525	3.62668	4.79118	1.80728	2.93413	4.54863	4.76694	3.27025	4.00206	4.97732	3.4033	2.5568	2.66937	4.05066	4.03816	pink	-0.323877	0.322825	0.511047
Ec-00_007590	5'-3' exoribonuclease	RNA modification or binding	OG0003558		9.20062	9.26413	10.2933	10.2822	10.2535	9.88571	10.1045	10.5735	9.01078	9.30941	9.65872	9.85871	9.9457	9.59144	9.71433	8.60723	10.0134	9.39611	9.29931	9.5894	9.49834	9.30361	9.34625	8.86535	8.38314	9.24645	9.99504	8.33379	8.75526	10.0374	10.2731	9.8353	9.75228	9.76384	9.73479	8.5513	9.3467	10.2337	10.1076	10.5023	10.3971	cyan	-0.202478	-0.155796	-0.0100384
Ec-00_007600	conserved unknown protein	Unknown	OG0019741		7.62055	6.25526	4.73436	4.93924	5.14003	6.49782	5.84504	5.42779	6.63736	6.89825	6.39752	2.7531	3.0958	1.76139	6.34416	1.69398	1.1857	3.96316	5.83705	9.972	9.45647	0	0	9.36297	9.08213	8.87856	9.39872	8.92963	9.71534	9.81928	9.72555	10.5699	10.2358	9.92048	10.3552	9.8199	9.63194	10.257	10.4637	10.5342	11.3799	salmon	0.338974	0.901194	0.571778
Ec-00_007610	LRR-GTPase of the ROCO family, putative pseudogene	Cellular regulation and signalling	OG0000025		8.61688	8.34024	7.89032	7.61252	7.57858	9.09283	8.63072	8.04322	10.1584	10.6596	10.5233	9.20105	9.41191	9.98082	9.67668	9.41063	9.10102	10.4873	10.403	9.27416	9.2402	8.69032	8.90647	10.3133	10.0904	9.19717	8.46192	9.74688	10.1954	9.00412	8.69224	9.59974	9.0694	9.24042	9.96852	11.1819	9.65417	9.46669	9.74985	8.76294	8.99769	brown	0.575222	0.173314	0.0812017
Ec-00_007620	Sept8ps, septin GTPase, pseudogene	Cytoskeleton and flagella	OG0019742		0	0	0	0	0	0	0	0	0	0	0	0	0	0	0	0	0	0	0	0.964221	0	0	0	0	0	0	0	1.32976	0	0	0	0	0	0	0	0	0	0	0	0	0	NA	NA	NA	NA
Ec-00_007630	Notch domain	Cellular regulation and signalling	OG0000022		6.49182	7.95827	8.2006	7.81623	7.65414	7.05378	8.23005	7.14558	10.4645	10.2765	8.51578	9.05401	9.33557	7.72886	6.8851	5.24357	5.42849	6.97424	6.14759	7.79204	7.73196	8.38774	8.61636	9.59493	9.88334	6.26815	9.00076	6.84897	5.86991	7.25807	8.93732	6.35422	6.54532	5.63913	4.82867	7.83756	8.09461	3.6318	3.55128	8.62275	8.03486	grey	-0.193922	-0.225366	-0.206114
Ec-00_007640	Hypothetical protein	Unknown	OG0019743		8.44332	8.78971	7.63541	7.82381	7.091	8.11847	7.74178	7.2858	8.34668	8.89712	8.15859	8.13542	7.94235	7.62205	7.87898	8.41747	8.20684	8.36089	8.45315	7.61439	7.80658	8.46519	8.56662	8.74621	8.7778	8.39301	8.12803	8.64053	8.53608	7.62073	7.68755	7.75642	7.39615	7.55227	7.20798	8.82796	8.59088	7.26709	7.26996	6.88006	6.14861	purple	-0.0731315	-0.122568	-0.316078
Ec-00_007650	hypothetical protein	Unknown	OG0019744		4.79178	5.462	0	1.75464	1.43994	0	0.993432	0	0	0	0	0.467569	0	0	2.11422	0	0	2.3164	1.16871	6.60069	5.84361	0	0	5.83565	6.07277	4.34297	5.73738	7.19285	5.86991	5.15303	5.4589	7.7322	7.10624	6.77959	7.19694	8.13754	4.89436	5.68561	5.77123	5.36553	6.28807	salmon	0.469188	0.966928	0.734593
Ec-00_007660	PIN domain-like	RNA modification or binding	OG0000039		0	0	0	0	0	0	0	0	0	0	0	0	0	0	0.999185	0	0	0	1.16871	0.964221	0	0	0	0	1.20982	0	0.522295	1.70947	0.752151	1.41498	0	1.13761	0.489014	3.02184	1.70196	0	0	0	1.65288	0	1.02048	NA	NA	NA	NA
Ec-00_007670	telomerase reverse transcriptase catalytic subunit splice variant a	RNA modification or binding	OG0000514		0	0	1.94355	2.52327	2.14606	4.2158	3.68829	3.68092	3.86722	3.68126	3.71335	3.76889	2.73594	3.5056	2.93718	4.32204	3.64069	1.86945	3.6127	3.25687	1.93405	2.39589	3.63244	3.53128	2.6444	3.98948	3.51976	4.26027	4.12294	2.93851	3.14	3.0358	2.44317	3.34438	2.95611	4.27056	1.90196	3.1922	2.66937	2.29071	2.03061	NA	NA	NA	NA
Ec-00_007680	Telomerase ribonucleoprotein complex - RNA-binding domain	RNA modification or binding	OG0019745		3.3074	5.462	2.39774	3.54657	3.87821	6.1857	5.68753	5.13595	6.84352	6.69366	6.26173	5.99493	5.67814	6.06889	6.18822	6.72884	6.43308	6.42502	6.63808	6.32073	6.45152	4.17409	5.28558	5.80191	5.63181	7.17868	6.93398	5.75425	5.9359	6.59111	6.70807	5.80239	5.71825	6.49226	5.45336	7.50757	6.76977	6.36457	6.07645	6.61947	6.26895	brown	0.667851	0.298984	0.135516
Ec-00_007690	serine/threonine protein kinase	Cellular regulation and signalling	OG0019746		5.19374	5.462	0	2.18955	2.61807	0	0	0	0	0	0	1.72101	1.70698	2.06591	2.41371	0	0	0	0	0	1.52649	1.27561	0	0	0.728178	2.10685	0	0	1.61018	1.41498	1.90123	1.37863	1.77438	2.60577	1.08863	2.34107	2.69475	0	0	1.84612	0	NA	NA	NA	NA
Ec-00_007700	expressed unknown protein	Unknown	OG0019747		7.55378	6.61362	5.66715	4.99401	4.8283	5.11678	3.98766	5.02389	4.72722	4.6239	6.07986	3.80884	4.49284	4.77044	4.24638	3.95704	4.79543	2.3164	4.62726	4.51559	3.72525	4.28341	3.1045	2.10452	3.25325	3.29572	4.23923	2.25822	2.35214	4.70034	4.58826	4.62078	4.56042	4.45004	4.5099	3.7225	5.02138	4.47015	4.09462	4.60631	4.94622	red	-0.436843	-0.178523	-0.144145
Ec-00_007710	EsV-1-7 domain protein	Cellular regulation and signalling	OG0019748	EsV-1-7 domain protein	9.69467	9.65949	8.76045	8.68571	8.61948	8.29035	8.30429	8.42047	8.87641	8.83205	9.9447	7.24616	6.92375	7.03199	7.32031	7.98009	7.61496	7.94537	7.96936	7.47482	7.74467	7.77092	7.54862	7.68393	7.67152	7.93134	7.6806	7.99169	8.07278	7.71815	7.75955	7.42142	7.43367	7.14369	7.17461	8.24781	8.62128	7.54374	7.33847	7.58312	7.57961	red	-0.687417	-0.218025	-0.538238
Ec-00_007720	Protein of unknown function DUF2854	Unknown	OG0005140		10.848	10.7152	7.71574	7.53152	8.34329	7.69755	8.07435	7.2858	11.5152	10.3276	11.0874	10.4125	10.2917	11.561	11.9115	10.5147	12.2656	9.9699	9.72871	9.99906	9.80174	11.944	11.7492	11.6665	10.8745	11.755	12.23	10.4671	10.8766	11.8054	11.8355	10.6879	10.641	11.6073	11.0832	10.5425	12.9886	11.2659	9.53729	11.3153	10.9302	lightcyan	0.71213	0.316069	0.295598
Ec-00_007730	Complex 1 LYR protein	Metabolism	OG0005139		8.06605	7.24578	8.90452	8.49475	8.68098	8.49168	8.73841	8.65485	7.41713	8.1936	7.48964	6.82214	6.946	6.90346	6.6566	7.58596	6.96173	7.49297	7.28323	6.43614	7.09192	7.3612	7.36125	7.84998	8.13283	6.95977	6.69371	8.20651	8.15128	6.54035	6.48078	6.80497	6.60634	6.83206	6.7554	7.66039	6.53444	6.76086	6.14363	6.30121	5.12695	brown	-0.76924	-0.38648	-0.519271
Ec-00_007740	PHflX, plastid HflX GTPase	Protein synthesis	OG0005138		13.1283	13.0253	11.3155	11.2312	11.0707	10.9537	10.9235	11.0984	11.1791	10.7493	10.9384	10.3834	10.2186	10.6878	10.6032	10.5592	10.7358	10.4685	10.2795	9.69746	9.84369	11.0717	11.0196	10.4945	10.456	10.4927	10.8364	10.4256	10.3882	10.2103	10.3055	9.92234	9.7777	10.2758	10.1507	10.1179	10.8372	10.366	10.0635	10.1237	10.3872	blue	-0.680383	-0.319873	-0.342711
Ec-00_007750	Major facilitator superfamily	Membrane function and transporters	OG0019749		7.55378	8.0781	7.96618	8.17738	8.36594	7.79594	7.54915	8.04322	6.66177	6.24627	5.87172	8.0484	7.81272	8.06131	7.81429	6.44403	7.04765	6.37975	6.85581	7.87035	7.89473	7.56981	7.64764	7.40928	7.80458	7.26911	7.37035	8.16527	7.72165	9.23312	9.16159	8.57536	8.4971	8.87662	8.76665	7.79856	7.46091	8.97743	9.13945	8.65096	8.18008	turquoise	0.184136	0.544067	0.671456
Ec-00_007755	lncRNA	Unknown	NA		0	0	0	0	0	0	0	0	0	0	0	0	0.462012	0	0	0	0	0	0	0.964221	0	0	0	0.731276	0	1.07211	0	0	0.752151	0.502471	0	0.485483	0.489014	0	0	2.34107	0	1.39397	1.05124	0	0	NA	NA	NA	NA
Ec-00_007760	hypothetical protein	Unknown	OG0019750		0	0	2.39774	1.12909	0	0	0.993432	0	1.4325	0	0	0.820122	0.462012	0	0.736313	0	0	0	1.16871	0	0	3.01882	2.74432	0	0	0	0	0	0	0	0	1.37863	0.489014	2.01874	0.460032	2.34107	0	1.39397	0	0	0	NA	NA	NA	NA
Ec-00_007765	lncRNA	Unknown	NA		0	0	0	0	0	0	0	0	0	0	0	1.10322	2.13657	0.845388	0	1.08252	1.1857	1.21845	1.16871	0	1.52649	0	1.53617	0	0	0	0	0	0	0	0	0	0.853573	0	0	0	0	0	0	0	0	NA	NA	NA	NA
Ec-00_007767	lncRNA	Unknown	NA		0	0	0	1.12909	0	0	0.993432	0	1.4325	0	2.0105	3.597	4.25687	3.93936	3.32046	1.69398	1.1857	0	0	0	2.25147	3.45247	4.78677	2.49076	3.52416	2.43563	0.904947	1.70947	0	0	0.83311	0.485483	0	0.59332	0	0	0	0	0	1.20016	0	NA	NA	NA	NA
Ec-00_007768	lncRNA	Unknown	NA		0	0	0	0	1.43994	0	0	1.21034	0	0	0	0	0	0.845388	0	0	0	0	0	0	0	0	0	0.731276	0	0	0	0.812953	0	0	0	1.37863	1.38623	0.59332	0.808298	0	0	0	0	0	0	NA	NA	NA	NA
Ec-00_007770	Hypothetical protein	Unknown	NA		3.3074	0	1.27694	0	0	2.43173	0.993432	1.21034	1.4325	1.85938	0	0.820122	0	0	0	0	0	0	0	0	0	1.27561	0	0	0	0	0	2.00978	1.61018	0.874424	1.11921	0.848085	0.489014	0	0	0	0	0	0	0	0	NA	NA	NA	NA
Ec-00_007780	Glucose/Sorbosone dehydrogenase and WSC domain protein	Cell wall and extracellular	OG0000046		17.23	17.1738	15.0261	14.715	15.0147	14.3017	14.9398	14.7854	14.733	15.1092	15.7987	16.6954	17.2478	16.8746	15.9414	14.2695	15.2206	15.2483	15.0576	13.7778	14.4385	14.5681	14.4849	13.2958	13.5696	14.3156	13.5096	13.6189	13.346	11.3936	12.2405	13.5822	15.7881	12.6927	15.5621	11.8138	7.74485	16.4105	15.7498	14.1249	13.876	grey60	-0.208404	-0.44322	0.0208412
Ec-00_007790	Hypothetical protein	Unknown	NA		13.6205	13.6139	12.054	11.9173	12.0664	11.2285	11.8134	11.6797	12.4698	12.6527	12.9842	12.8515	12.7798	12.6831	12.1279	11.6459	11.018	11.6606	11.3357	9.23371	10.7412	12.2381	12.3156	11.9196	12.5991	9.90384	7.29621	12.4686	12.2924	5.28222	5.50928	9.49165	11.0581	8.98198	10.993	10.0832	5.52869	11.5893	11.0643	9.24865	9.87668	grey60	-0.366463	-0.49844	-0.163415
Ec-00_007800	myosin-like antigen	Cytoskeleton and flagella	OG0008485		10.0131	9.92223	5.62616	5.88687	7.03556	7.84273	7.09546	7.3453	7.72584	7.83521	7.45269	7.80344	7.92677	7.79763	7.52455	6.90063	6.04465	6.91201	7.3175	8.0927	8.13085	6.33228	6.64115	8.31819	8.30742	7.37351	7.20104	8.35061	8.03188	7.66879	7.64593	8.27539	8.62203	8.34903	8.34982	8.69978	6.92406	8.32965	8.53088	8.09544	8.10661	turquoise	0.274625	0.61577	0.668313
Ec-00_007810	hypothetical protein	Unknown	OG0019751		7.91465	7.82757	5.62616	4.40481	5.50907	3.96821	3.15823	4.06756	2.96284	2.64548	3.71335	6.28426	6.24293	4.68365	4.39076	0	1.1857	0	1.16871	3.63368	3.50394	2.74071	0	6.59568	6.14147	1.90929	0.904947	5.38776	6.29142	5.01113	4.86467	5.39936	6.75925	6.83206	5.92401	2.82785	4.8264	6.69438	4.41777	6.92697	6.22994	turquoise	-0.0262663	0.484338	0.682033
Ec-00_007820	GDP-mannose transporter	Membrane function and transporters	OG0006279		11.3041	11.1911	9.60907	9.56915	9.39346	9.22587	9.81181	9.71302	10.0046	9.54084	10.7174	11.1933	11.1613	11.2939	11.3614	9.7861	11.4195	10.3851	10.2996	11.5186	11.4779	10.5807	10.4664	10.5044	10.3721	11.0938	11.7204	10.6995	10.6059	12.18	12.1664	12.2029	12.1341	11.8945	11.5052	10.6358	11.4908	12.1943	12.0629	11.8208	11.5385	turquoise	0.72812	0.620688	0.696055
Ec-00_007830	Domain of unknown function DUF4168	Unknown	OG0006280		3.3074	0	4.05795	3.21885	4.54041	4.6113	3.89461	3.94983	7.71421	7.52107	7.66137	6.41943	6.85485	6.9783	6.99462	8.07284	6.17762	8.33741	8.54278	7.42779	7.61226	6.40666	6.0358	6.85622	6.48597	5.95858	4.69296	6.83946	6.93217	5.88051	5.71645	6.46943	6.61824	6.07984	6.79008	7.66039	5.52869	7.26709	7.69267	6.7814	7.5323	tan	0.701453	0.0421284	0.0879602
Ec-00_007840	EamA domain	Membrane function and transporters	OG0001330		3.3074	3.55699	1.94355	1.75464	2.61807	1.30166	2.574	1.85911	1.4325	0	1.33033	3.2359	3.15813	4.5913	4.96805	2.94606	1.8276	1.21845	1.80579	1.53706	2.92276	2.39589	3.63244	3.04635	3.8863	1.68033	1.20709	2.96555	4.00492	0	0.83311	0.848085	1.14434	0	0.460032	1.60093	0	0	1.05124	0	2.03061	NA	NA	NA	NA
Ec-00_007845	lncRNA	Unknown	NA		8.7421	9.21268	9.55823	9.54183	9.48941	9.63765	8.57558	8.57757	6.94648	6.22107	6.67918	6.43866	6.28544	6.75173	6.90928	3.31352	3.11244	2.93259	3.75286	3.83937	4.00421	6.63007	6.33646	8.61877	8.73398	5.99645	5.67715	8.26091	7.86405	5.35746	5.5216	6.53935	6.58224	5.89487	6.58526	6.59349	3.73524	6.27642	6.93275	6.06997	4.84659	brown	-0.632263	-0.0110877	0.038247
Ec-00_007847	lncRNA	Unknown	NA		0	0	8.80704	9.04473	8.70487	8.75405	7.76168	7.57141	0	1.21055	0	0	0	0	0	1.69398	2.27029	0	1.16871	1.94599	3.09142	0	0	0	0	0	0	0	0	0	0	0.485483	0	0	0	4.77789	0	4.99693	4.79741	4.44377	3.35858	lightcyan	-0.665155	-0.231376	-0.303827
Ec-00_007848	lncRNA	Unknown	NA		0	0	6.45645	6.49251	5.84629	7.90579	6.55683	6.51823	2.13694	0	1.33033	1.72101	0.462012	1.3749	1.73582	6.1582	5.38514	4.91615	5.73932	5.45271	6.42018	0	0	1.21426	1.85845	0	0	2.25822	2.14454	0	0.475874	0.848085	0	1.82521	0.460032	7.98379	6.4238	7.6874	7.24978	6.04183	6.83472	black	-0.261421	-0.0907347	-0.221759
Ec-00_007850	Hypothetical protein	Unknown	OG0019752		4.23263	0	0	1.12909	0	1.97463	0.993432	1.85911	4.41885	3.52533	3.71335	5.06764	4.65292	7.41538	6.5983	5.93917	4.58167	6.01556	5.44081	5.21484	5.46791	5.53829	5.21352	5.31999	5.21374	6.45198	6.24025	5.10011	4.92719	7.1856	6.77137	5.94973	5.23715	5.50011	5.41578	6.00079	4.95927	5.20226	6.24909	5.41024	6.32556	brown	0.905286	0.380826	0.434417
Ec-00_007860	Hypothetical protein	Unknown	NA		0	0	0	0	0	0	0	0	0	0	0	0	0	0	0	0	0	0	0	0	0	0	0	0	0	0	0	0	0	0	0	0	0	0	0	0	0	0	0	0	0	NA	NA	NA	NA
Ec-00_007865	lncRNA	Unknown	NA		9.86956	10.2115	8.19361	8.27461	7.48511	9.02548	7.85726	7.61074	8.48993	8.52745	8.8874	5.4298	5.01477	4.89156	5.98329	6.81729	6.9469	7.8069	7.90321	7.4198	7.41968	7.39813	7.66125	8.77476	8.69566	3.29572	2.53571	9.11826	9.12064	5.48372	4.84519	6.48884	5.924	6.51651	6.10808	9.5137	7.38025	6.47431	6.77219	6.32476	5.39724	blue	-0.467187	-0.116085	-0.292726
Ec-00_007870	Hypothetical protein	Unknown	OG0019753		0	0	1.27694	0	0	0	0.993432	1.21034	0	0	0	0.467569	0.462012	0	0	0	0	0	0	0	1.52649	0	0	0.731276	0	0	0	0	0	0	0	0	0	0	0	2.34107	0	3.1922	2.07619	2.29071	2.03061	NA	NA	NA	NA
Ec-00_007880	expressed unknown protein	Unknown	OG0019754		0	3.55699	0	0	0	1.30166	0.993432	0	0	1.21055	0	2.66877	2.46716	3.40067	1.99878	2.12208	0	0	0	0	0	2.39589	1.53617	3.35635	2.6444	0	0.904947	2.81853	3.49372	0.502471	1.56257	1.13761	1.77438	2.34191	2.35932	4.10995	0	0	2.07619	0	1.02048	NA	NA	NA	NA
Ec-00_007890	tRNA Ser	Protein synthesis	NA		0	0	0	0	0	0	0	0	0	0	0	0	0	0	0	0	0	0	0	0	0	0	0	0	0	0	0	0	0	0	0	0.485483	0.489014	0.59332	0	0	0	0	0	0	0	NA	NA	NA	NA
Ec-00_007900	Cyclin, N-terminal	Cell cycle	OG0005446		8.3676	8.3874	10.7048	10.3792	10.3246	10.0954	10.1366	10.62	9.82439	10.1454	9.5895	9.70774	9.1781	8.87739	9.35225	10.1897	10.4281	9.79992	9.74349	9.57148	9.44483	9.03323	9.03223	8.89366	9.05211	9.53397	9.44189	9.37331	8.79136	9.6848	9.80332	8.76241	8.91033	9.64695	9.17556	9.79039	9.50454	9.43989	9.29777	9.7763	9.41782	yellow	-0.444943	-0.446043	-0.602709
Ec-00_007910	expressed unknown protein	Unknown	OG0019755		0	0	0	0	0	0	0	0	0	1.85938	0	1.10322	0	2.31723	0.999185	0	0	0	1.16871	0	0.95637	0	0	1.21426	0	0	0	0	0	0	0	0	0.853573	0	0.808298	0	2.35214	0	0	1.20016	1.02048	NA	NA	NA	NA
Ec-00_007920	hypothetical protein	Unknown	OG0019756		3.3074	3.55699	3.92908	3.68618	4.18038	5.11678	4.94146	4.37218	5.55081	4.69882	5.16334	5.56426	5.20394	6.18403	6.45234	5.54928	6.04465	5.03769	5.67028	5.6838	6.12207	4.56901	4.97287	6.49369	6.75511	6.09281	5.33133	6.50874	7.00316	5.88051	5.85925	5.76042	5.89495	5.50011	5.16705	6.9185	5.13812	4.99693	5.9319	4.68119	5.76783	red	0.700996	0.414361	0.388318
Ec-00_007930	Hypothetical protein	Unknown	NA		0	0	1.27694	1.12909	0	1.97463	0	0	0	0	0	0	0	0	0	0	0	0	0	0	0	0	0	0	0	0	0	0	0	0	0	0	0	0	0	0	0	0	0	0	0	NA	NA	NA	NA
Ec-00_007940	Cyclophilin-like domain	Protein binding or modification	OG0019757		0	0	0	1.12909	0	0	0	0	0	0	0	0.467569	1.09247	1.3749	0	0	0	0	0	0.964221	0	0	0	0.731276	0	0	0	0	0	0	0	1.58509	1.14434	0	0.808298	0	0	1.39397	0	0	1.02048	NA	NA	NA	NA
Ec-00_007950	Hypothetical protein	Unknown	NA		0	0	0	0	0	0	0	0	0	0	0	0	0	0	0	0	0	0	0	0	0	0	0	0	0	0	0	0	0	0	0	0	0	0	0	0	0	0	0	0	0	NA	NA	NA	NA
Ec-00_007960	expressed unknown protein	Unknown	OG0019758		0	0	0	0	0	0	0	0	0	1.21055	0	0	0	0	0	0	0	0	0	0	0	0	0	0	0	0	0	0	0	0	0	0	0	0	0	0	0	0	0	0	0	NA	NA	NA	NA
Ec-00_007970	hypothetical protein	Unknown	OG0019759		0	0	0	0	0	0	0	0	0	0	0	0.467569	0	0	0	0	0	0	0	0.964221	0	0	0	0.731276	0	0	0	0	0	0	0	0	0	0	0	0	0	0	0	0	0	NA	NA	NA	NA
Ec-00_007980	Cdc23	Cell cycle	OG0000274		4.79178	4.49436	5.13578	5.19441	4.91277	4.52212	5.37947	5.18887	5.197	5.84582	5.97954	5.64373	5.72007	5.43388	5.41344	4.32204	4.13517	4.91615	4.62726	5.42104	4.86852	5.19082	5.48238	4.66812	4.00904	4.77926	5.14824	3.62668	4.86078	4.76809	5.11293	5.99568	6.0078	5.60938	5.62786	3.92919	5.39431	3.42868	4.41777	4.68119	5.56336	grey	0.0183984	-0.222114	-0.0425773
Ec-00_007990	Prefoldin beta-like	Protein binding or modification	OG0019760		8.06605	8.0781	8.76045	9.14494	8.73419	9.36058	9.35318	9.069	8.58874	8.57794	8.49776	8.5477	8.64377	8.59776	8.56823	8.12576	8.11032	8.54129	8.55241	8.21317	8.43519	9.69353	9.99637	8.251	8.50807	7.27425	7.73774	8.40316	8.09462	7.28915	7.47585	8.40704	8.17133	8.55819	8.10614	8.37696	8.15127	7.5311	7.45767	7.45027	6.97108	salmon	-0.459056	-0.641886	-0.509807
Ec-00_008000	Hypothetical protein	Unknown	OG0019761		0	0	0	0	0	0	0.993432	1.21034	0	0	0	0	0	0	0	0	0	0	0	0	0	0	0	0	1.20982	0	0	1.32976	1.61018	0	0	0	0	0	0	0	0	0	0	0	0	NA	NA	NA	NA
Ec-00_008010	Ribonuclease H-like domain	RNA modification or binding	OG0000209		5.7655	6.25526	5.44948	7.31197	5.50907	9.38608	8.04217	5.81211	6.48149	6.34287	4.65728	4.91126	4.46844	3.5056	4.29613	6.24581	6.20281	4.08096	3.45744	3.51868	3.09142	4.28341	4.97287	4.1295	4.69759	6.10442	6.05389	7.2077	5.86991	4.39222	4.80542	6.23669	5.93356	5.23371	5.25481	5.57797	4.33345	3.96828	4.41777	3.80494	3.35858	grey	-0.54366	-0.140711	-0.346223
Ec-00_008020	hypothetical protein	Unknown	OG0019762		0	0	1.94355	0	0	1.30166	1.5762	0	0	0	0	1.10322	2.56243	3.78115	3.80584	0	0	0	1.16871	1.53706	2.51149	0	0	1.21426	1.57029	2.28059	0	0	1.90196	0	0.475874	1.13761	3.24385	2.01874	1.32325	0	1.90196	2.5568	2.8941	0	0	NA	NA	NA	NA
Ec-00_008030	hypothetical protein	Unknown	OG0019763		0	3.55699	2.74265	0	0	1.30166	0.993432	1.85911	0	0	0	0	0	0	1.73582	0	0	1.21845	1.16871	0	1.52649	0	0	0	1.20982	0	0	0	0.752151	0	0	0.485483	0	0	0	0	0	1.39397	0	0	0	NA	NA	NA	NA
Ec-00_008040	expressed unknown protein	Unknown	OG0019764		9.89675	9.77039	8.46166	8.66898	8.77988	8.65789	8.36625	8.39817	8.12753	8.28154	8.71092	6.96159	7.65415	8.18496	7.06088	7.58596	7.2302	7.55537	7.57525	6.77367	7.17876	7.74248	7.77826	8.83855	9.10467	7.26394	6.42005	9.39617	9.29892	6.85269	6.86139	7.11914	7.10624	6.79949	7.32411	8.41183	6.90771	7.46617	7.17681	6.83157	7.02904	blue	-0.605128	-0.153069	-0.19202
Ec-00_008050	conserved unknown protein	Unknown	OG0007498		7.62055	7.7575	9.47123	9.56689	9.24658	9.26762	9.74674	9.93839	9.55789	9.31835	9.72735	9.71301	9.39664	9.63979	9.81108	9.95969	9.86941	9.9584	9.87395	9.5405	9.73166	9.93255	9.84363	10.531	10.5148	10.2433	10.1795	10.5705	10.6697	9.91578	10.054	9.49485	9.52386	9.39776	9.07366	10.2321	10.0651	9.76276	9.73903	9.41968	9.44788	green	0.388748	0.120288	-0.0541623
Ec-00_008060	Cathepsin-like proteinase	Proteolysis	OG0007499		12.378	12.3421	10.7768	10.3754	10.2311	10.4589	11.0875	10.7827	13.5867	12.7454	12.8819	14.5407	14.8727	15.3755	14.3669	11.9003	12.9466	13.1538	13.9917	13.9249	14.0117	13.6432	13.733	13.8725	13.9852	12.717	12.7275	14.2208	14.1495	14.7339	14.5684	15.09	15.1282	14.5763	15.3318	12.8526	12.8681	15.2201	15.4834	14.6546	15.2447	brown	0.905545	0.45124	0.683444
Ec-00_008070	von Willebrand factor, type A	Cell wall and extracellular	OG0000111		14.2773	14.3751	6.50247	8.09834	8.33566	6.63174	5.81996	6.11529	7.20091	8.05788	8.8874	7.05591	7.83197	11.8388	12.0333	11.0614	12.0588	13.6653	13.0478	9.99772	9.89446	7.29747	7.27537	4.87699	4.93284	5.99645	3.21545	2.96555	2.97141	1.80728	3.07458	2.96365	2.73309	4.38127	3.37703	4.10995	0	0	0	2.29071	2.61893	grey60	-0.354329	-0.595325	-0.369338
Ec-00_008080	Hypothetical protein	Unknown	OG0019765		5.7655	4.49436	6.35976	6.07647	6.52032	6.37586	5.44657	5.77797	5.38472	6.08804	5.28041	4.89279	4.75728	4.44065	5.19481	5.24357	4.6565	4.91615	5.00911	4.97418	4.77251	5.66491	5.21352	4.97108	5.47028	4.22033	3.98478	5.16241	5.39431	3.99991	2.85841	4.36476	4.72353	5.51623	5.46567	6.29036	4.60088	4.11103	4.95534	4.82022	3.94488	brown	-0.621256	-0.377236	-0.397172
Ec-00_008090	Hypothetical protein	Unknown	OG0019766		0	0	6.61148	7.37523	6.97791	7.73771	7.47876	7.64902	2.96284	3.68126	1.33033	0	0.462012	0	0.41463	6.40651	5.76921	6.04486	6.09588	5.85949	6.16051	0	0	1.21426	0	0.633432	0	0	1.24404	1.16987	0.83311	0.485483	0	0.59332	0.808298	7.42462	5.39431	5.13701	6.12158	5.79446	4.94622	black	-0.415796	-0.234128	-0.439467
Ec-00_008100	hypothetical protein	Unknown	OG0019767		4.23263	4.49436	8.4022	8.97496	9.14983	9.59182	8.93815	9.24489	5.32482	6.27103	5.4894	2.15218	1.86482	2.71748	2.32062	8.51326	7.76623	8.46207	8.20117	8.44344	8.1453	3.01882	3.1045	3.89358	3.8863	3.29572	2.53571	4.07834	3.87637	2.36915	2.04477	2.63243	2.21144	2.82875	3.0894	8.80191	7.90993	7.5687	7.93949	7.8898	6.88581	black	-0.47692	-0.2463	-0.481324
Ec-00_008110	expressed unknown protein	Unknown	OG0019768		9.81358	9.87337	10.0728	10.1928	10.2311	10.0641	9.84638	9.95376	10.0881	10.3826	10.9194	9.52718	9.73884	9.61215	9.36324	9.25041	9.5809	9.94098	9.85268	9.78248	9.72846	9.64826	9.93048	9.81706	9.64979	9.44549	9.79279	9.37166	9.25112	9.99743	10.0348	9.67933	9.68386	9.65607	10.1101	9.2112	9.02154	8.92524	9.13945	9.24865	9.41565	turquoise	-0.484834	-0.429168	-0.491459
Ec-00_008130	hypothetical protein	Unknown	OG0019769		3.3074	4.49436	5.2481	5.19441	5.66333	5.53665	4.89417	5.23993	7.64241	8.14754	6.85935	5.29564	4.58647	5.74377	5.01337	5.8581	0	5.68439	5.39874	3.83937	4.77251	2.74071	3.39248	6.10834	4.86945	0	0	5.30732	5.10981	0.502471	0.475874	5.25569	4.65587	4.1528	4.25001	5.2327	2.69475	1.39397	1.05124	1.20016	0	lightgreen	-0.344935	-0.368452	-0.301243
Ec-00_008140	hypothetical protein	Unknown	OG0019770		0	0	0	0	1.43994	1.30166	0	0	0	0	0	4.71498	2.89081	4.967	4.75332	2.45179	2.60856	1.21845	1.16871	2.93679	3.91708	1.94186	0	0	0	2.43563	0.904947	0	0	0	0.83311	0	1.38623	0	0	0	0	1.39397	1.05124	0	0	NA	NA	NA	NA
Ec-00_008145	lncRNA	Unknown	NA		0	0	3.02081	3.02206	1.43994	3.29142	2.79608	2.64517	0	2.92054	0	0.467569	1.86482	1.3749	1.87328	0	0	0	0	0	0	2.39589	0	3.61139	3.60422	2.10685	2.16669	4.01222	2.35214	0.874424	0.83311	2.07054	1.38623	1.60163	1.32325	0	0	4.11103	1.05124	4.26057	0	NA	NA	NA	NA
Ec-00_008150	expressed unknown protein	Unknown	OG0019771		0	0	3.25392	3.21885	1.43994	3.29142	3.44747	3.68092	3.86722	3.68126	2.0105	3.34861	2.36515	2.71748	3.77108	2.45179	0	2.3164	1.80579	2.52483	2.92276	4.28341	3.39248	3.53128	3.68008	4.13237	2.64036	3.79345	4.06514	2.1154	2.40555	1.76567	2.44317	2.01874	1.525	3.19117	2.97141	2.0895	2.8941	2.29071	2.61893	NA	NA	NA	NA
Ec-00_008157	lncRNA	Unknown	NA		0	3.55699	5.82035	6.31027	5.06818	5.39313	5.03163	4.62355	1.4325	0	0	2.27136	3.7502	2.06591	3.58347	2.45179	3.3108	1.86945	1.80579	0.964221	1.93405	4.05581	3.83811	4.84421	3.68008	1.90929	0.522295	3.53546	4.06514	3.51298	0	3.1701	3.24385	1.33694	4.30587	2.82785	2.35214	1.39397	1.05124	0	1.6122	grey	-0.487459	-0.21442	-0.138614
Ec-00_008160	hypothetical protein	Unknown	OG0000154		0	0	0	0	0	0	0	0	0	0	0	0	0.811408	0	0	0	0	0	0	0	0	0	0	0	0	0	0	0	0.752151	0	0	0	0	0	0	0	0	0	0	0	0	NA	NA	NA	NA
Ec-00_008170	Hypothetical protein	Unknown	OG0019772		5.9841	6.03601	1.94355	1.12909	2.97312	0	0	0	0	0	0	2.48371	2.25539	0	4.8892	1.08252	0	0	1.16871	5.01718	5.52795	0	0	11.3953	12.0195	7.42994	5.25097	12.881	12.1161	9.19055	8.63384	9.88437	10.7016	11.9817	8.91321	10.3469	4.75507	11.0189	10.0299	10.0212	8.62176	salmon	0.490321	0.927193	0.799765
Ec-00_008175	lncRNA	Unknown	NA		5.9841	4.49436	0	1.12909	0	0	0	0	0	0	0	1.10322	0	0	4.02822	0	1.1857	0	1.16871	5.25132	5.1233	0	0	8.46286	8.33115	6.6471	5.76078	9.28505	8.83741	9.86576	9.45297	9.4294	10.5449	11.0819	8.0459	8.35024	2.97141	10.8072	9.84375	10.122	9.35802	salmon	0.554746	0.926044	0.781218
Ec-00_008177	lncRNA	Unknown	NA		3.3074	5.462	1.27694	0	1.43994	1.30166	0	0	0	0	0	1.33977	1.52973	0	3.62299	0	0	0	0	4.78807	4.95854	0	0	7.69776	7.72623	5.6135	4.83203	8.6995	7.97022	8.6682	8.26377	8.76108	10.006	10.6987	7.29336	7.70325	2.69475	9.92858	8.79397	9.00443	7.15932	salmon	0.528692	0.92172	0.800629
Ec-00_008180	Hypothetical protein	Unknown	NA		0	0	0	0	0	0	0	0	0	0	0	0	0	0	0	0	0	0	0	0	0	0	0	0	0	0	0	1.32976	0	0	0.475874	0	0	0.59332	0	0	0	0	1.05124	1.20016	0	NA	NA	NA	NA
Ec-00_008190	MyTH4 domain	Cytoskeleton and flagella	OG0019773		11.0432	10.8643	7.65591	7.83885	8.31252	8.17807	7.88171	7.94664	9.53494	9.33899	9.70134	8.53286	8.85843	8.92073	8.68487	8.38407	8.58757	8.37249	8.77836	7.98309	8.08162	8.73911	8.87762	8.49225	8.39162	8.45777	8.48845	8.78861	8.66572	8.84852	8.78078	8.7504	8.52739	8.73223	8.46929	8.80847	9.7444	8.89596	8.42684	8.26933	8.27894	green	0.00608399	0.0749893	0.0240805
Ec-00_008200	Zinc finger, MYND-type	Cellular regulation and signalling	OG0008085		8.91166	8.82439	10.5936	10.6852	10.7331	10.3104	10.8425	11.2809	10.7557	10.4163	11.0601	10.7373	10.7424	10.6822	11.0249	10.7604	10.7348	10.9711	10.9045	11.0249	11.0726	10.6059	10.5326	10.3546	10.4808	11.374	11.5858	10.5876	10.3889	11.2253	11.3305	11.0188	10.8255	10.6647	10.586	10.832	10.7675	10.7166	11.0978	10.9158	11.0741	blue	0.377708	0.0395576	-0.0691523
Ec-00_008210	Catalase-peroxidase haem	Redox	OG0019774		4.23263	0	3.45454	3.54657	3.69951	1.97463	2.574	0	0	0	1.33033	4.18785	3.90362	3.1647	3.83979	0	0	0	1.16871	4.78807	4.43891	1.94186	2.26318	4.28414	3.82078	2.57562	2.30046	3.09897	3.80753	2.8579	3.32012	3.23284	3.91858	2.34191	3.93279	3.48116	1.90196	2.5568	4.41777	4.82022	4.94622	NA	NA	NA	NA
Ec-00_008215	hypothetical protein	Unknown	OG0000050		13.8962	13.6039	10.6662	9.90014	11.0992	10.5618	10.4777	9.66479	6.94648	6.22107	6.49764	5.13205	6.54072	4.01241	4.34422	5.15582	4.33063	4.55817	6.06931	5.45271	5.64102	1.94186	0	5.03056	3.68008	3.02968	1.20709	3.62668	4.68004	0.502471	1.90123	2.43312	2.81809	3.77798	1.85957	3.19117	1.24404	3.1922	1.05124	2.90463	1.6122	brown	-0.857468	-0.375514	-0.319155
Ec-00_008220	Catalase decomposes hydrogen peroxide to molecular oxygen and water	Redox	OG0019775		3.3074	4.49436	5.54052	4.76121	4.64289	5.9324	4.15749	2.30503	0	0	0	0	0	0	0	0	0	0	0	0	0	0	0	0	0	0	0	0	0	0	0	0	0	0	0	0	0	0	0	0	0	brown	-0.912008	-0.287656	-0.32518
Ec-00_008230	catalase/peroxidase	Redox	OG0019776		8.40596	8.89136	8.64209	8.13536	8.13048	7.39253	8.5299	8.65485	8.13627	7.947	7.59511	7.85444	8.07549	7.69598	7.69186	7.42638	7.50789	7.25052	6.97511	6.93934	7.32131	7.8171	7.77826	7.22423	6.81523	7.8019	7.95875	6.85841	7.29481	7.33082	7.39442	7.6853	7.56243	7.55618	7.37069	6.21338	8.05061	7.77579	7.31923	7.84164	7.80867	tan	-0.596737	-0.391759	-0.270924
Ec-00_008240	Catalase decomposes hydrogen peroxide to molecular oxygen and water.	Redox	OG0000050		10.2103	10.1444	6.94719	6.41434	8.25706	7.66667	8.07435	6.29502	2.96284	3.15146	4.65728	1.10322	2.73594	1.76139	0.999185	1.69398	0	1.21845	1.16871	0.964221	1.52649	0	0	2.10452	0	0	0	0	1.90196	0	0	0	0.489014	0	0.808298	0	0	0	0	0	0	brown	-0.890549	-0.363958	-0.345827
Ec-00_008250	Haem peroxidase	Metabolism	OG0019777		9.11058	9.49698	8.47326	8.67737	8.38824	8.96754	8.5942	8.65955	7.91037	7.60137	7.53747	7.32405	7.40063	7.54413	7.29606	8.1768	7.78303	7.81543	7.49767	6.84701	7.14081	7.86185	7.88649	7.381	7.69457	7.90835	7.56238	7.3683	7.38617	6.69918	6.79186	6.81013	6.75387	7.20963	6.92996	7.50757	8.35797	6.2458	6.18675	6.34793	6.79518	brown	-0.819265	-0.469288	-0.555027
Ec-00_008255	lncRNA	Unknown	NA		0	0	1.27694	0	0	1.30166	1.5762	0	0	0	1.33033	1.10322	0.462012	0	0.736313	0	1.1857	1.86945	0	1.94599	1.93405	0	1.53617	3.82804	4.17554	2.92885	3.57361	5.16241	4.71804	4.76809	5.32467	4.08765	3.91858	2.60577	2.72979	5.06756	1.90196	3.1922	2.8941	2.63008	1.6122	NA	NA	NA	NA
Ec-00_008260	hypothetical protein	Unknown	OG0019778		3.3074	0	0	1.12909	0	0	0	0	0	0	0	1.54294	0.462012	0	3.22094	0	0	0	0	2.93679	2.51149	0	0	0.731276	1.85845	3.44923	4.5922	2.65481	3.4033	4.97336	2.29502	8.16711	6.8579	4.931	6.13916	1.60093	3.73524	3.42868	3.55128	2.90463	2.61893	salmon	0.510193	0.773936	0.65276
Ec-00_008270	Harbinger transposase-derived nuclease domain	Transposon or viral gene	OG0000042		0	0	1.27694	0	0	0	0	0	0	0	0	0	0	0	0	0	0	1.21845	0	0.964221	0	1.27561	0	0.731276	1.20982	0	0	2.25822	0	1.16987	0	0.485483	0.853573	0.59332	0	0	0	0	0	1.20016	0	NA	NA	NA	NA
Ec-00_008280	Tyrosinase copper-binding domain	Metabolism	OG0019779		0	0	6.78908	6.78429	5.20847	6.0646	6.75514	6.57898	2.96284	2.64548	0	7.03922	6.4502	7.16609	8.602	4.47489	3.90901	2.65715	2.58314	6.68311	6.62649	3.92695	3.1045	5.90086	5.82798	8.83916	9.3073	5.46394	4.89437	7.61154	8.31954	6.66979	5.93356	6.18445	4.95633	6.7379	7.47208	4.24093	5.14216	6.41528	3.94488	blue	0.195362	0.310717	0.313145
Ec-00_008290	hypothetical protein	Unknown	OG0000635		11.2042	11.102	9.56638	9.59374	10.2393	9.47787	8.99809	9.19401	9.27097	9.60312	9.15223	7.78604	7.60465	6.78338	7.32031	9.03984	9.03244	8.96177	8.85813	9.30268	8.93946	6.97783	6.26697	7.13219	6.14147	9.04589	9.18072	6.66754	7.04861	8.74725	8.98705	8.1181	8.24033	7.78637	7.52869	8.89728	10.2867	8.05726	8.12825	9.08248	9.55039	red	-0.549133	-0.0630512	-0.335103
Ec-00_008300	hypothetical protein	Unknown	OG0000060		0	0	0	0	0	1.30166	0	0	0	0	0	0.820122	0.462012	0	1.22146	5.24357	5.73509	1.21845	0	1.53706	0.95637	3.01882	2.26318	2.31053	2.6444	4.0387	2.91525	1.70947	1.61018	0	3.14	0	0.853573	0	0	0	0	0	0	1.20016	1.6122	grey	0.23347	-0.076946	-0.0875672
Ec-00_008310	Hypothetical protein	Unknown	OG0019780		0	0	6.91353	6.95965	7.14438	7.05378	6.91768	7.10484	0	1.21055	2.0105	0.820122	0.811408	0	0	7.71436	5.58992	8.01363	8.24337	7.0366	7.06177	0	0	1.21426	0.728178	0	0	0	0	0	0	0	0	0	0	7.66039	6.59697	5.32452	6.32824	5.11849	5.08385	black	-0.343189	-0.229407	-0.388345
Ec-00_008320	Exocyst complex component Sec10-like	Vesicle trafficking and secretion	OG0019781		5.7655	6.44554	5.707	6.72075	7.22919	6.97196	7.05302	7.04868	8.79596	8.96699	7.81482	5.59885	6.4502	6.81435	6.16832	6.08882	4.79543	7.39401	7.27162	6.23225	6.55615	5.66491	5.54244	6.05204	6.11438	5.51258	5.05665	5.51259	6.21374	3.66287	4.02145	5.73896	5.49121	5.27221	5.0896	6.71015	5.34658	3.96828	5.5904	4.52733	4.62396	turquoise	-0.437709	-0.510185	-0.546652
Ec-00_008330	Exocyst complex component Sec10-like	Vesicle trafficking and secretion	OG0019782		0	0	5.01398	4.03859	3.69951	5.58148	4.63122	4.83756	7.15004	7.83521	6.44845	0.820122	0.462012	0.845388	0	0	1.8276	1.21845	0	0.964221	0	1.27561	0	0	1.20982	0	0	0	0	0	0	2.53622	0.489014	0.59332	0	0	0	0	0	0	0	turquoise	-0.604345	-0.539477	-0.670888
Ec-00_008340	Hypothetical protein	Unknown	OG0019783		6.49182	7.1396	1.27694	2.52327	2.97312	2.43173	1.5762	2.30503	0	0	1.33033	6.75214	6.71152	6.21531	7.00588	3.60613	1.1857	1.21845	1.80579	6.78615	6.12207	3.01882	3.39248	5.45638	5.97075	6.02115	5.58838	5.62747	5.50715	7.19794	7.18181	5.91189	6.72114	7.80945	7.74618	4.54642	4.23203	6.96264	6.34736	7.71371	7.33503	turquoise	0.545405	0.711241	0.943333
Ec-00_008350	Amino acid/polyamine transporter I	Membrane function and transporters	OG0008846		9.94964	10.045	8.0615	8.15352	8.6005	7.9492	8.38775	8.22526	8.70491	8.40414	8.55116	8.95955	8.81436	8.94425	9.12937	7.98646	8.4205	8.36089	8.71977	9.40134	9.46801	8.14863	8.09135	8.213	8.38597	8.77162	9.18288	8.25378	8.33676	9.68698	9.86628	9.64225	9.71259	9.31951	9.44021	8.54346	9.16602	9.62974	9.65517	9.86128	9.74106	turquoise	0.403404	0.592207	0.640036
Ec-00_008360	Glutathione S-transferase	Redox	OG0000072		0	0	0	1.12909	0	0	0	0	0	0	0	0	0	0	0.41463	0	0	0	0	0	0	0	0	0	0	0	0	0	0	0	0	0	0	0	0	1.60093	0	0	0	0	0	NA	NA	NA	NA
Ec-00_008370	Glutathione S-transferase	Redox	OG0000072		5.50776	5.77737	5.19303	4.99401	6.57319	5.34193	5.1165	6.41094	2.96284	3.35047	4.26118	3.29335	6.31993	4.08193	4.27147	2.12208	0	5.14979	6.9462	2.52483	3.82435	1.94186	2.26318	2.10452	2.09853	0	0	1.32976	1.24404	0.502471	0	2.43312	1.38623	1.01252	1.08863	2.34107	1.24404	0	0	0	1.02048	blue	-0.674002	-0.565075	-0.385405
Ec-00_008380	Glutathione S-transferase	Redox	OG0000072		6.62786	7.02497	6.20136	5.91553	7.80543	6.09584	6.51054	7.69548	5.12858	4.46128	4.74138	5.1937	7.1438	4.5913	5.39073	4.9625	4.98156	6.79621	7.59401	4.25317	5.33977	7.66379	7.83939	3.35635	2.91943	1.40803	0.904947	2.4701	1.90196	0.502471	1.35786	3.0358	1.14434	2.82875	2.88455	2.82785	1.24404	0	2.8941	0	2.61893	grey60	-0.597349	-0.772834	-0.533223
Ec-00_008400	hypothetical protein	Unknown	OG0019784		4.79178	6.61362	0	1.12909	2.14606	0	0	1.21034	1.4325	0	0	6.79256	6.3995	6.05166	5.24634	1.69398	1.8276	1.21845	0	6.09849	5.74587	0	1.53617	6.56583	6.34161	3.65263	2.64036	6.27495	6.38889	2.36915	3.20257	5.42646	6.33068	5.79266	5.13656	5.80481	1.90196	5.20226	5.77123	5.72537	5.49919	turquoise	0.511664	0.664048	0.937132
Ec-00_008410	hypothetical protein	Unknown	OG0019785		0	3.55699	1.27694	0	0	0	0	0	0	0	0	4.89279	4.81646	3.69502	2.50116	0	0	0	0	3.63368	3.3791	1.27561	0	3.68728	3.52416	2.57562	0.522295	2.4701	3.20346	1.80728	2.04477	4.24812	4.88984	3.93017	4.03549	4.66679	0	3.96828	2.40305	3.66436	4.03816	NA	NA	NA	NA
Ec-00_008420	Hypothetical protein	Unknown	OG0019786		6.75218	6.76415	10.6598	10.4434	10.5291	10.5716	9.92349	10.2137	8.0371	7.73197	7.45269	6.04597	5.65671	6.50831	6.17498	9.99014	9.67164	10.2135	10.0743	9.26304	9.4193	6.97783	7.02477	7.62726	7.64811	5.40408	5.56198	7.85689	7.36237	4.57985	4.88389	5.91189	5.70716	5.75238	6.1771	11.2819	9.95798	9.28661	9.40206	9.24865	9.25977	black	-0.449743	-0.274787	-0.460064
Ec-00_008430	Ribonuclease Zc3h12a-like	RNA modification or binding	OG0002240		9.54801	9.62055	11.05	10.5569	10.8245	10.2716	9.91906	10.6308	11.0658	11.4102	11.539	9.67839	9.46141	9.34507	9.37269	10.9312	11.0957	11.1213	11.0935	10.7293	10.4281	9.48047	9.42414	9.89914	9.5994	9.80506	9.5897	9.78203	10.2204	9.8606	9.8271	10.0438	10.1706	9.35693	9.38536	10.5775	11.2485	10.3994	10.5015	10.4295	11.2243	midnightblue	-0.227115	-0.2483	-0.550936
Ec-00_008440	Protein kinase, C-terminal	Cellular regulation and signalling	OG0001886		12.7996	12.6675	11.0295	10.9479	11.421	10.0402	10.0299	10.4824	10.1541	10.5386	10.7148	10.3109	10.6999	11.1168	10.6527	10.6919	11.3828	11.2241	11.2752	10.7269	10.5909	10.3922	10.4191	9.54863	9.15206	10.3206	10.5912	9.32476	9.80526	10.9141	10.9489	10.6686	10.8395	10.608	10.5867	9.66591	11.2534	10.6827	10.4593	10.5468	10.8544	red	-0.296676	-0.18282	-0.10702
Ec-00_008450	expressed unknown protein	Unknown	OG0008066		6.17389	5.05783	3.63064	4.8823	5.50907	5.17645	4.84527	4.1764	6.61252	6.72983	7.66137	7.97348	7.25136	7.78205	7.83968	8.2044	8.57798	7.93759	8.41673	7.60032	8.25596	8.33157	8.34847	6.26514	6.62681	6.28864	5.6014	7.46417	6.78775	7.80134	6.99113	9.04732	8.21313	6.66854	8.11789	10.0859	7.43832	4.47015	3.79365	4.94702	5.08385	grey	0.518265	0.00474449	0.0490624
Ec-00_008460	Pleckstrin homology-like domain	Cellular regulation and signalling	OG0019787		12.6458	12.5865	8.9674	9.12668	9.65797	9.06153	8.35756	8.30534	7.1151	7.56178	7.70391	8.62666	8.54809	8.42793	8.45233	7.82517	8.73729	8.07171	8.29588	9.99638	9.71238	6.43062	6.49683	6.95931	6.71961	8.81288	9.79916	6.17272	6.54505	9.59516	9.72421	9.88681	9.53095	9.1321	8.70437	8.58988	9.89301	8.82004	8.53088	9.13337	8.99187	pink	-0.231604	0.275461	0.244626
Ec-00_008480	Myosin head, motor domain	Cytoskeleton and flagella	OG0008520		11.7762	11.5587	8.26209	8.03445	8.86715	8.91158	8.45448	8.60217	9.09388	9.11111	10.0012	9.44953	9.82361	9.47189	9.40706	8.88814	10.0098	9.19849	9.48415	9.36435	9.39734	8.67033	8.86592	8.46016	8.11244	8.75331	9.41633	8.28911	8.45119	9.96532	9.99118	9.80594	9.87576	9.57564	9.2406	9.5137	10.3948	10.2239	9.87374	9.97167	9.57394	green	0.193207	0.236418	0.277432
Ec-00_008490	conserved unknown protein	Unknown	OG0019788		7.91465	7.52421	9.54729	8.06035	7.91188	7.47801	7.5338	7.97705	7.86903	7.64938	7.75538	7.16383	7.17805	6.65239	6.23998	7.12515	8.10365	6.6322	6.48568	4.97418	6.59877	8.05152	8.10137	8.77258	8.34578	5.3466	4.74082	8.48467	8.87574	5.82857	5.39334	5.91189	6.80161	5.71095	7.68167	6.7379	5.44051	6.67152	6.89425	6.15124	6.10616	brown	-0.508352	-0.394897	-0.297803
Ec-00_008500	Integrin alpha beta-propellor domain protein	Membrane function and transporters	OG0019789		9.13362	9.04633	8.76989	8.94051	8.7855	9.48968	8.82921	8.38121	10.309	10.2841	10.0308	8.64884	8.79242	8.95587	8.09991	8.31992	7.2545	8.27697	8.35757	7.93905	7.99386	8.94862	9.0786	9.90013	9.90029	8.19284	7.74656	9.95919	10.0888	7.0785	6.92772	8.45388	8.79843	7.85771	8.84061	9.43536	7.56885	8.05726	8.58828	7.26794	8.32594	blue	-0.272349	-0.168715	-0.170209
Ec-00_008510	Mini-chromosome maintenance, DNA-dependent ATPase	DNA or chromatin modification	OG0019790		7.62055	7.7575	7.53933	7.23447	7.37031	8.04834	7.90575	7.3453	9.12495	9.14499	9.24518	6.03759	5.73036	6.08591	6.18161	7.35922	7.06148	7.40535	7.17525	7.12771	7.07189	6.56661	6.19395	7.92243	7.55548	7.17868	6.63793	7.82354	8.34589	6.0074	5.98028	5.79201	6.04354	5.83184	6.22858	8.53557	7.9424	6.99982	7.27995	6.63839	6.82166	turquoise	-0.407356	-0.127242	-0.508009
Ec-00_008520	conserved unknown protein	Unknown	OG0019791		0	0	0	0	0	0	0	0	0	0	0	1.10322	0.462012	0	0	0	0	0	0	0	0	0	0	0	1.20982	0	0.904947	0	0	0	0	0	0	0	0	0	0	0	0	0	0	NA	NA	NA	NA
Ec-00_008530	WD40-repeat-containing domain	Protein binding or modification	OG0004839		8.96402	9.01664	8.42628	9.0512	9.09665	8.79745	8.40894	8.692	8.0371	8.7151	8.08807	7.38479	7.53589	7.24399	7.2304	7.69114	7.39224	7.71877	7.94765	7.63525	7.49682	7.33605	7.16509	7.28656	7.05491	7.70993	7.3161	7.10833	7.23709	7.46274	7.36737	7.62518	7.51229	7.46358	7.16709	8.35024	7.68853	7.35579	7.63935	7.55353	7.74784	red	-0.858854	-0.302191	-0.455816
Ec-00_008550	Armadillo-like fold protein	Cellular regulation and signalling	OG0019792		0	0	4.65508	4.55808	5.20847	6.56633	3.89461	4.46093	1.4325	3.15146	2.81935	3.92246	3.5785	3.03046	3.32046	2.71999	2.60856	2.93259	3.6127	3.51868	3.09142	2.39589	1.53617	3.04635	1.85845	2.82044	3.94447	2.00978	2.53359	3.70957	3.83652	4.39251	4.4582	3.60783	3.26876	2.34107	2.35214	3.1922	3.41288	3.33394	4.36059	magenta	-0.157376	-0.0876725	-0.0471896
Ec-00_008560	Armadillo-type fold	Cellular regulation and signalling	OG0002322		5.19374	3.55699	9.06647	9.22154	9.02729	9.5274	8.78128	8.60704	6.84352	8.37016	8.08002	6.59536	6.72703	6.65239	6.84805	7.9478	8.36022	8.36089	8.17025	8.27649	7.80658	4.73216	4.97287	6.09447	5.63181	7.23255	7.78986	5.60522	6.41226	7.60229	7.61463	7.4678	7.42692	6.71119	6.65143	7.50757	8.26476	7.97563	7.84173	8.58911	9.20299	yellow	-0.226785	-0.14699	-0.33027
Ec-00_008570	Hypothetical protein	Unknown	NA		3.3074	5.05783	6.89639	5.91553	5.84629	7.28821	6.07449	6.57898	2.6082	2.92054	3.71335	2.38144	2.65179	1.3749	5.27143	4.67752	5.62761	6.33303	5.89872	4.45432	5.27116	3.78545	3.63244	5.71392	6.59777	4.89069	3.903	6.14213	6.41226	3.79865	3.26254	2.20179	0.853573	4.38127	0.808298	0	2.97141	0	2.8941	2.29071	3.84516	grey	-0.520271	-0.273483	-0.38288
Ec-00_008580	Zinc finger, RING/FYVE/PHD-type	Cellular regulation and signalling	OG0019793		0	0	0	0	0	0	0	1.21034	0	0	0	0.467569	0	0	0	0	0	0	0	0	0	0	0	0	0.728178	0	0	0.812953	0.752151	0.502471	0	2.32209	1.93523	0.59332	0.460032	0	0	0	0	0	0	NA	NA	NA	NA
Ec-00_008585	lncRNA	Unknown	NA		5.19374	6.90045	2.39774	3.21885	2.14606	3.29142	1.5762	2.92022	0	0	2.0105	3.34861	2.46716	3.03046	5.28381	1.69398	3.11244	2.93259	1.80579	2.52483	2.25147	3.25187	2.74432	7.31075	7.10393	3.58797	2.01923	8.9116	8.85457	6.30216	5.5216	8.69438	7.93252	8.19977	7.34092	5.30868	0	5.85748	5.18531	4.35508	4.03816	turquoise	0.33476	0.675915	0.708711
Ec-00_008590	conserved unknown protein	Unknown	OG0019794		0	3.55699	1.27694	0	0	0	0	0	0	0	0	0	0	0	1.58388	0	0	0	0	0	0	0	0	0.731276	2.09853	0	0.522295	3.09897	2.97141	1.41498	0.475874	3.65553	3.24385	3.60783	2.72979	0	0	2.0895	0	1.84612	0	NA	NA	NA	NA
Ec-00_008600	hypothetical protein	Unknown	OG0019795		0	0	0	0	0	0	0	0	0	0	0	0	0	0	0	0	0	0	0	0	0	0	0	0	0	0	0	0.812953	0	0	0	1.13761	0.853573	1.01252	0	0	0	0	0	0	0	NA	NA	NA	NA
Ec-00_008610	hypothetical protein	Unknown	OG0019796		0	0	0	0	0	0	0	0	0	0	0	0.820122	1.70698	0.845388	1.22146	1.08252	0	0	0	0	0	0	0	1.21426	1.20982	1.40803	0	0	0.752151	0.502471	0	0	0.489014	0	0	0	0	0	0	0	0	NA	NA	NA	NA
Ec-00_008620	hypothetical protein	Unknown	OG0000060		0	0	3.25392	0	1.43994	0	1.5762	0	4.52913	4.54488	3.33452	2.90828	2.00709	3.1647	2.22111	1.69398	2.60856	1.21845	0	0	0	2.39589	0	2.49076	2.91943	2.10685	0.522295	1.70947	2.53359	1.16987	0	0	1.14434	0.59332	0	0	1.24404	0	0	1.20016	1.02048	NA	NA	NA	NA
Ec-00_008640	Hypothetical protein	Unknown	NA		0	0	1.27694	1.75464	0	0	0	0	1.4325	1.21055	1.33033	0	0	0	0.41463	0	0	0	1.16871	0	0	0	1.53617	1.21426	0	0	0	0	0	0	0	0	0	0	0	0	0	0	0	0	0	NA	NA	NA	NA
Ec-00_008630	expressed unknown protein	Unknown	OG0000060		0	0	0	1.12909	2.61807	0	0	1.21034	3.48477	2.30532	2.81935	2.48371	3.7502	4.08193	3.62299	1.69398	2.27029	1.86945	0	0	0.95637	0	0	1.86411	1.85845	0	0	2.96555	2.14454	0	0	0.485483	1.14434	0	0.460032	0	0	0	0	0	0	NA	NA	NA	NA
Ec-00_008650	Hypothetical protein	Unknown	OG0019797		7.4102	7.43724	7.60409	7.37523	7.12681	8.1634	7.95267	7.3453	9.81626	9.04085	8.7571	9.35487	9.21979	10.137	9.1574	8.0907	7.76623	8.27079	8.45827	8.01527	8.26921	8.566	8.95147	10.6196	10.5868	7.66753	7.58551	10.7416	10.7303	9.03768	8.75361	9.81494	9.78432	9.50467	10.6423	10.3604	8.59088	9.71884	10.2157	9.24557	9.46478	brown	0.663731	0.453306	0.541526
Ec-00_008660	Hypothetical protein	Unknown	OG0019798		16.3073	16.2987	9.88576	10.5409	11.3037	9.68207	9.36189	9.86304	8.62645	8.86901	8.03074	9.06229	9.43333	8.57985	8.20131	7.38839	7.32501	6.83025	7.09849	8.02584	7.9341	6.19911	6.43481	9.36586	9.3289	9.92363	9.90601	8.83716	9.0756	9.63728	9.85293	8.9433	9.12988	8.8813	8.70826	9.25507	8.95943	8.18381	8.35306	8.41357	8.0235	pink	-0.520919	0.235553	0.193372
Ec-00_008670	expressed unknown protein	Unknown	OG0000153		16.027	15.9957	11.7904	12.3386	12.2317	11.1082	12.1366	12.0733	10.3032	10.1571	11.4387	7.70895	8.02621	4.89156	5.76216	9.49126	7.68813	3.69406	4.95208	9.69415	9.2153	7.33605	6.74703	10.0683	9.81032	9.70285	11.0438	9.73411	9.57484	12.4004	12.5763	10.4338	9.58804	9.9333	11.3555	9.14019	9.01773	10.815	11.7998	10.7266	9.91253	blue	-0.473051	0.324026	0.10003
Ec-00_008680	Hypothetical protein	Unknown	NA		15.9356	16.027	11.4106	12.1827	11.6257	11.6323	11.5414	11.434	10.3433	9.91341	10.9227	6.97482	7.41346	5.51153	5.40213	9.07016	6.63161	3.16378	2.8561	8.29844	8.16434	6.7492	6.84567	10.698	10.905	9.52644	10.0165	10.6896	10.4303	11.3153	11.4141	9.63356	8.68562	9.45535	10.935	10.0614	8.57025	9.64448	10.6996	9.40318	7.87338	blue	-0.50706	0.319807	0.0946515
Ec-00_008690	hypothetical protein	Unknown	OG0001357		7.25074	7.02497	9.58521	9.91972	9.73829	8.98015	9.69248	10.1879	7.92052	7.60137	8.29006	8.40836	8.11924	7.99977	8.60817	8.4955	8.78809	7.70966	7.99782	8.10272	8.12601	8.76761	8.58101	8.62601	8.24947	9.55315	10.014	8.3304	8.89453	9.13604	9.28058	8.1181	7.93965	8.39118	7.45649	8.32302	8.97128	8.31497	8.20889	8.57936	8.57194	greenyellow	-0.377246	-0.125387	-0.296006
Ec-00_008700	P-loop containing nucleoside triphosphate hydrolase	Metabolism	OG0001356		7.07143	7.02497	7.83744	7.91179	7.64182	8.0721	7.78131	7.65843	8.56304	8.84447	8.33135	7.26064	7.26204	7.51928	7.75771	8.43155	7.52796	8.46749	8.32425	7.76706	7.84249	8.00439	7.87486	8.48695	8.50547	8.36192	8.17669	8.42238	8.66328	8.05066	8.08223	7.60753	7.99089	7.21952	8.20125	8.66407	7.4269	7.39818	7.80761	7.26794	7.86067	purple	0.112643	0.0324612	-0.315849
Ec-00_008720	conserved unknown protein	Unknown	OG0001354		4.79178	5.462	3.02081	2.52327	2.14606	2.77832	2.79608	2.64517	3.48477	4.54488	3.871	6.85591	6.946	6.15206	5.90529	3.60613	2.27029	2.3164	4.39023	7.24088	7.05158	3.25187	3.39248	6.84798	6.67395	5.56392	4.71709	6.82027	7.12132	6.2239	5.75872	6.26698	7.07204	6.81912	7.04521	6.68186	4.51713	7.1562	7.38549	7.78335	7.94137	turquoise	0.705226	0.743014	0.914893
Ec-00_008730	Phox homologous domain	Membrane function and transporters	OG0001355		11.6699	11.6437	8.38388	8.1655	8.8777	6.92054	6.41325	7.5207	8.51024	8.53769	8.48562	9.6831	9.79631	9.29288	9.13536	8.0966	9.1077	7.83232	7.77754	8.61421	8.41942	8.5714	8.51509	9.48892	9.83334	7.96356	7.78416	9.82117	9.83258	8.18064	8.17683	10.7629	11.1112	8.69552	9.36825	8.06271	10.0595	8.47535	8.30496	8.65561	9.23782	yellow	0.150439	0.345276	0.526558
Ec-00_008740	conserved unknown protein	Unknown	OG0000312		7.33267	6.25526	3.63064	3.392	3.49551	3.96821	3.68829	3.35014	5.197	5.24028	5.62841	9.67366	9.73756	9.61947	9.85894	5.91265	5.58992	5.20273	5.21704	8.53135	8.07157	6.11287	6.33646	8.40503	8.61823	8.0441	7.44449	8.31677	8.8503	9.659	9.48872	9.27958	10.1281	10.9442	10.4902	6.7379	7.52664	9.96194	9.47125	11.2864	10.3993	turquoise	0.819433	0.643222	0.879224
Ec-00_008750	expressed unknown protein	Unknown	OG0019799		10.9293	10.7059	9.01183	8.45138	8.47415	8.80219	8.98121	8.46406	10.9267	10.5701	8.75204	9.1611	9.24962	8.72546	8.28993	9.22908	8.46282	9.23071	9.45622	8.75742	8.86576	9.11684	9.24145	9.18461	9.31856	8.77888	8.78374	9.66988	9.133	7.34198	7.15832	9.42268	9.1392	8.55234	8.21226	9.61444	9.11708	7.10593	7.16608	7.30393	6.32556	blue	-0.313883	-0.226708	-0.299499
Ec-00_008760	conserved unknown protein	Unknown	OG0019800		0	0	1.27694	0	0	1.30166	1.5762	0	0	0	0	0.467569	0.462012	0	1.22146	0	0	0	0	0	0	0	0	0	1.57029	0	0	0	0	0	0	0	0	0	0	0	0	0	0	0	0	NA	NA	NA	NA
Ec-00_008770	expressed unknown protein	Unknown	OG0019801		8.96402	9.1319	2.39774	3.02206	4.64289	3.29142	1.99014	2.30503	3.86722	4.46128	4.14247	4.33191	4.07497	4.81195	4.50094	4.0573	2.60856	3.96316	3.28344	4.63083	4.72199	2.74071	4.17809	5.63946	5.28835	4.91725	4.30438	5.38776	5.999	3.7548	3.71299	5.20965	5.34133	5.09028	4.84761	5.2327	5.19313	4.57241	4.62004	3.80494	4.20836	blue	0.106176	0.513972	0.512846
Ec-00_008780	Hypothetical protein	Unknown	OG0019802		7.25074	7.43724	1.94355	2.79411	2.61807	2.43173	0	1.85911	2.96284	3.35047	2.81935	2.27136	2.65179	1.3749	2.80596	2.12208	1.1857	2.3164	1.80579	3.10569	2.92276	1.27561	2.74432	3.15725	2.91943	3.65263	2.64036	3.53546	3.30684	2.58488	2.69391	3.5609	3.36179	3.02184	3.0894	3.7225	4.8264	1.39397	2.40305	3.1352	2.84228	blue	-0.101141	0.439099	0.30611
Ec-00_008790	hypothetical protein	Unknown	OG0000585		8.5838	8.92372	3.25392	4.13922	4.18038	4.42706	1.5762	3.68092	4.52913	3.68126	3.33452	4.65048	4.81646	4.21167	4.93702	5.10987	4.23621	4.63722	4.69834	4.92985	5.00153	3.45247	3.83811	5.2715	5.63181	5.13658	4.45545	5.36144	5.81835	4.42057	3.87545	5.62663	5.28272	4.97833	5.36409	6.21338	5.69037	4.36008	4.34351	5.1714	2.84228	blue	0.0536542	0.463362	0.429842
Ec-00_008800	expressed unknown protein	Unknown	OG0000022		4.23263	3.55699	3.02081	2.18955	2.61807	3.66915	4.07508	0	5.44223	5.18923	3.09981	0.467569	1.09247	0	0.41463	0	0	0	0	0.964221	0	4.28341	3.63244	5.43452	6.04435	0	0.522295	2.4701	1.61018	0	0	0	0	0.59332	0	0	0	0	0	1.20016	0	blue	-0.451997	-0.253846	-0.310033
Ec-00_008810	Sept9ps, septin GTPase, pseudogene	Cytoskeleton and flagella	OG0019803		0	0	0	1.12909	0	1.30166	0.993432	0	0	0	0	1.33977	4.94577	1.3749	0.736313	0	0	0	0	0	0	0	0	3.15725	0	0	0	3.33366	3.30684	0	0	1.76567	1.93523	0	0	0	0	0	1.05124	1.20016	0	NA	NA	NA	NA
Ec-00_008820	Carbohydrate-binding WSC	Cell wall and extracellular	OG0000000		5.50776	0	7.58282	7.56808	7.39988	7.02161	8.47872	7.68631	2.13694	4.06791	4.01311	10.1222	9.65012	9.57194	9.47005	2.71999	3.3108	6.84698	5.70521	6.72262	7.41173	1.94186	2.74432	3.68728	2.91943	1.40803	0.522295	3.79345	3.94208	1.62442	1.35786	8.99625	10.3834	8.70435	4.70948	4.41507	1.24404	5.06867	3.79365	4.05066	3.03565	grey	-0.132554	-0.22035	0.164884
Ec-00_008830	Cysteine synthase	Metabolism	OG0001591		10.0499	9.9849	11.1618	10.7393	10.6889	11.2187	12.1702	11.7731	12.0343	11.7406	11.9541	11.5539	11.8562	11.6265	11.6714	11.5836	11.5795	12.3417	12.2493	12.2878	12.2889	11.7979	11.5597	11.7938	11.5934	11.6341	12.2208	11.4278	11.2586	11.1145	11.156	11.9115	11.8088	11.6157	11.168	11.2291	12.7177	12.1059	12.1095	11.7112	11.3558	blue	0.485183	-0.0403338	-0.139826
Ec-00_008835	lncRNA	Unknown	NA		3.3074	5.77737	4.73436	4.48348	5.14003	6.47424	6.19647	5.59399	4.52913	4.96477	5.28041	6.82214	6.64234	7.10895	6.84805	5.91265	5.03863	6.91201	6.31525	6.30347	6.78252	5.95659	6.23092	6.43985	6.82361	5.62965	5.4368	6.57895	5.81835	5.06599	4.86467	6.91428	6.85287	6.83206	6.65143	7.05713	6.32875	6.08211	5.74262	4.68119	4.03816	tan	0.429388	0.129978	0.281393
Ec-00_008840	WSC domain containing protein	Cell wall and extracellular	OG0000000		9.66334	9.47531	11.6136	11.3966	11.649	10.7674	11.9501	12.0671	9.90331	9.98999	11.193	10.5708	11.0164	10.4012	9.35078	7.79644	8.32624	8.58681	8.20117	7.99927	8.27798	6.05238	4.88282	7.76497	7.62909	5.5299	4.83203	7.74429	7.85555	5.29758	5.31053	8.91249	11.8482	5.96704	11.3856	5.69585	2.35214	11.1835	10.6446	9.0686	8.70591	grey	-0.434173	-0.348781	-0.0546861
Ec-00_008850	expressed unknown protein	Unknown	OG0019804		10.3643	10.5897	10.8058	10.9923	11.1115	11.0426	10.791	11.2226	8.90225	8.9632	10.2637	8.77017	8.13676	8.21621	7.29606	2.94606	2.27029	4.18987	3.08553	2.26425	2.51149	6.02115	6.46615	7.21785	7.62909	2.10685	0	8.40638	7.64481	0	0	4.08765	5.79365	5.00142	1.70196	0	0	0	0	0	1.02048	brown	-0.721254	-0.52399	-0.327849
Ec-00_008860	expressed unknown protein	Unknown	OG0019805		6.75218	7.95827	8.99985	8.84318	8.63199	8.58821	8.59789	7.76684	9.34446	8.98207	9.15223	8.11166	7.71243	9.01261	8.2589	8.92842	8.30895	8.56676	8.20117	7.74164	7.93963	8.01235	8.34003	9.11074	9.51777	8.53055	7.66208	9.61525	9.56575	7.71243	7.51336	7.66269	7.27735	8.01352	7.53746	10.5267	8.97913	8.46209	8.25519	7.85787	8.04051	purple	-0.10376	-0.0883926	-0.285862
Ec-00_008870	Glutathione S-transferase	Redox	OG0000072		10.4309	10.3248	10.7919	10.2558	9.83075	10.3087	9.9627	10.0694	9.31397	9.24837	9.17886	11.4126	11.1833	11.9536	11.9511	9.76956	9.82144	9.7452	9.87969	11.1642	11.7176	10.8849	10.9631	12.4471	12.6509	12.633	12.702	12.3355	12.2871	11.9785	12.0433	11.6754	11.5403	11.7325	11.7465	11.8822	11.5479	11.4264	11.588	11.5344	11.1148	turquoise	0.554998	0.734167	0.759916
Ec-00_008880	Hypothetical protein	Unknown	OG0019806		0	0	3.63064	2.79411	2.97312	2.43173	1.99014	3.15114	0	0	0	0	0	0	0.736313	2.45179	0	1.86945	1.80579	2.52483	2.73173	0	0	1.21426	1.85845	0	0.522295	2.25822	0.752151	0.874424	0	0.848085	0	0.59332	0.460032	4.41507	3.4033	4.11103	3.79365	3.80494	2.03061	NA	NA	NA	NA
Ec-00_008890	Glutathione S-transferase	Redox	OG0000072		8.51527	7.95827	6.50247	6.63718	7.16175	7.31501	7.41318	7.68631	6.1772	6.89825	7.75538	7.06006	7.23338	7.84839	7.85013	6.65074	6.91678	7.35945	7.66671	7.90511	7.89473	8.31879	8.46166	8.2416	8.0096	7.42532	8.01092	7.5885	7.61993	8.3282	8.19233	8.37958	8.46287	8.41502	8.6474	7.67482	8.29021	8.16756	8.00117	7.73144	7.73396	turquoise	0.482727	0.572162	0.543794
Ec-00_008910	Regulator of chromosome condensation 1/beta-lactamase-inhibitor protein II	DNA or chromatin modification	OG0002055		11.9023	11.6485	10.0728	9.7767	9.82804	9.20811	9.07697	9.15796	9.59323	9.8242	9.56086	8.63363	8.35869	8.82005	8.56189	9.7751	9.25945	9.8691	9.93224	9.42349	9.20614	8.96102	8.69784	8.54674	8.25568	8.8322	8.42577	8.49075	8.54668	8.5024	8.67027	8.82738	8.91154	8.7914	9.02248	9.797	8.49014	9.33833	9.2452	9.61137	9.58944	red	-0.52709	-0.184126	-0.243499
Ec-00_008920	hypothetical protein	Unknown	OG0019807		11.3783	11.3602	4.05795	5.32833	6.379	6.67375	6.65939	5.081	7.61766	7.41396	6.56842	10.9025	10.6208	11.1445	11.9383	8.50441	8.24976	8.07171	8.59027	11.814	11.6457	9.17119	9.28165	12.6433	12.4328	11.7803	11.5485	12.2758	12.3212	12.0601	11.9014	12.9734	12.244	12.1195	12.2489	13.6246	12.3918	11.3875	12.1795	11.5147	11.9677	brown	0.771794	0.80818	0.832981
Ec-00_008930	hypothetical protein	Unknown	OG0000332		0	0	0	1.12909	1.43994	1.30166	0.993432	1.85911	1.4325	1.21055	0	1.72101	1.70698	1.3749	1.22146	0	0	0	0	0	1.52649	0	0	1.57547	2.48435	0	1.20709	2.65481	2.35214	0	0.475874	2.53622	3.04662	1.33694	1.08863	0	0	2.5568	1.65288	1.20016	0	NA	NA	NA	NA
Ec-00_008940	PC-Esterase	Metabolism	OG0000068		0	0	1.94355	1.12909	0	4.32529	3.79513	2.92022	4.52913	3.52533	4.01311	5.78061	5.8858	5.00329	5.05731	4.79835	4.72763	5.09483	5.21704	2.26425	1.52649	6.17093	6.64115	0.731276	0	1.07211	0.522295	0.812953	0	0	0	0	0	0.59332	0	0	0	0	0	0	0	lightyellow	-0.0576367	-0.85539	-0.528484
Ec-00_008950	Exocyst complex component Sec6	Vesicle trafficking and secretion	OG0007248		6.17389	5.05783	5.40171	5.9712	5.61372	6.27028	6.46272	6.7115	6.88559	7.1052	7.32223	7.49604	7.803	7.58062	7.6253	7.20382	7.87207	7.52451	7.5076	7.66259	7.87175	7.01	7.37783	5.96324	6.05863	7.45282	7.95368	6.04625	6.17328	8.23552	8.27837	7.40449	7.64035	7.97611	7.79823	7.31835	7.48316	8.06605	8.11715	8.25715	8.44143	brown	0.761446	0.184794	0.266533
Ec-00_008970	expressed unknown protein	Unknown	OG0000859		5.9841	3.55699	3.02081	3.21885	2.97312	5.53665	5.81996	5.18887	4.41885	5.02424	4.96773	5.56426	5.9041	4.38672	4.68026	4.15105	3.3108	4.29112	4.62726	5.05894	4.61533	4.17409	3.83811	5.38979	6.15483	4.45599	3.40562	4.74046	4.89437	4.87437	4.90286	5.17811	5.81449	5.25309	4.90299	5.15249	2.35214	5.13701	5.18531	5.22243	5.32504	turquoise	0.327039	0.27879	0.478775
Ec-00_008980	Zinc finger, RING-type	Proteolysis	OG0019808		0	0	0	0	0	0	0	0	0	0	0	1.54294	0.462012	0	0.736313	0	0	0	0	0	0	0	0	1.21426	0.728178	0	0	3.43809	1.24404	0.502471	0	2.96365	3.30403	2.72156	1.525	0	0	1.39397	1.05124	0	0	NA	NA	NA	NA
Ec-00_008990	Pectin lyase fold/virulence factor	Cell wall and extracellular	OG0019809		3.3074	0	1.27694	1.75464	1.43994	3.29142	3.79513	0	1.4325	0	0	0	0	0.845388	0.999185	1.69398	0	0	0	1.94599	0.95637	0	0	0	0	0	0	0	0	0	0.475874	0	0.489014	0	0	0	0	1.39397	1.05124	0	0	NA	NA	NA	NA
Ec-00_009000	probable extracellular nuclease (ISS)	Proteolysis	OG0000043		0	0	2.74265	3.392	0	5.34193	5.23511	1.85911	4.63157	3.15146	4.37085	3.76889	4.39269	3.60341	4.56322	3.14146	2.27029	3.538	4.20738	4.97418	4.91423	2.74071	3.63244	4.97108	4.41636	4.56079	4.09936	4.96681	5.5287	4.20936	3.9503	5.24051	5.17406	3.77798	4.3858	6.08962	5.02138	4.75745	4.68162	3.66436	4.68292	blue	0.578099	0.390171	0.257423
Ec-00_009010	hypothetical protein	Unknown	OG0019810		0	0	0	0	0	0	0	0	0	0	0	0.467569	0.462012	0	0.999185	0	0	0	0	0.964221	0	0	0	1.86411	1.57029	1.07211	0	4.26027	4.51713	1.16987	0.475874	4.73355	3.79821	4.95486	3.1517	0	0	2.0895	0	0	0	NA	NA	NA	NA
Ec-00_009020	expressed unknown protein	Unknown	OG0019811		12.7483	12.7099	5.89126	8.65205	7.52591	7.39253	8.10062	6.31896	7.56685	7.6111	6.26173	10.1704	9.85276	10.9583	11.6131	7.61915	8.37137	9.54449	9.93224	14.0876	13.6571	8.17724	8.41423	13.5075	13.3918	13.263	13.8763	13.1594	12.9101	13.5344	13.5439	14.7926	14.2929	14.1314	13.7273	13.2368	14.6537	13.2748	13.5186	13.2137	13.0037	salmon	0.638007	0.918515	0.818992
Ec-00_009030	hypothetical protein	Unknown	OG0000354		0	0	1.27694	1.12909	0	3.96821	3.15823	1.85911	6.45379	6.92969	6.01376	4.73585	4.63111	5.07325	4.82286	7.31939	6.2519	7.37107	7.3399	5.21484	5.46791	5.9232	5.28558	4.77633	4.46005	5.51258	5.05665	4.61241	4.17852	3.34569	3.26254	3.29296	2.64277	3.8812	2.13098	6.04589	5.24611	4.36008	4.48839	3.1352	4.36059	pink	0.54554	-0.207693	-0.27083
Ec-00_009035	lncRNA	Unknown	NA		0	0	0	0	0	1.97463	1.99014	0	2.96284	4.17675	2.81935	3.55063	3.33043	3.93936	3.54283	3.73282	3.90901	4.29112	4.95208	1.94599	2.92276	3.62854	1.53617	2.10452	2.48435	3.02968	3.14605	1.32976	3.20346	0.874424	1.35786	1.92615	2.07993	2.60577	1.32325	3.92919	1.90196	2.0895	1.65288	1.84612	0	NA	NA	NA	NA
Ec-00_009040	conserved unknown protein	Unknown	OG0019812		0	0	0	2.18955	2.14606	3.05756	2.31141	0	3.24728	2.92054	3.09981	0	0.462012	1.76139	0.41463	0	1.1857	0	0	0	0	1.27561	3.39248	3.53128	2.91943	0.633432	0	2.25822	3.20346	0	0	0	0.489014	1.01252	0.808298	0	0	0	0	1.20016	0	NA	NA	NA	NA
Ec-00_009060	Hypothetical protein	Unknown	NA		0	0	0	0	0	0	0	0	0	0	0	0	0	0	0	0	0	0	0	0	0	0	1.53617	0	0	0	0	0	0	0	0	0	0	0	0	0	0	0	0	0	0	NA	NA	NA	NA
Ec-00_009050	expressed unknown protein	Unknown	OG0000060		0	0	1.94355	2.18955	2.14606	0	0	1.21034	6.96622	5.63307	6.28993	5.92394	6.58677	7.04945	6.5983	9.30497	8.02816	8.91097	9.34986	4.73754	5.19912	6.38229	6.37	4.23442	3.75215	2.10685	0.904947	3.62668	5.16589	1.16987	2.04477	1.37863	3.18106	1.01252	1.85957	4.41507	0	2.5568	3.9011	2.63008	1.02048	lightyellow	0.304773	-0.505611	-0.276881
Ec-00_009070	conserved unknown protein	Unknown	OG0000325		0	0	1.27694	1.12909	0	0	1.5762	0	0	0	0	0.467569	2.13657	2.88244	1.99878	0	0	0	0	0	2.25147	0	0	0	0.728178	0	1.66957	0	0	0	0	2.63243	2.64277	2.47986	0.808298	2.82785	2.97141	1.39397	1.05124	1.20016	1.02048	NA	NA	NA	NA
Ec-00_009080	hypothetical protein	Unknown	OG0019813		0	0	0	0	0	0	0	0	0	0	0	0	0	0	0	0	0	0	0	0	0	0	0	0	0	0	0	0	0	0	0	0	0	0	0	0	0	0	0	0	0	NA	NA	NA	NA
Ec-00_009100	Thioredoxin-like fold	Redox	OG0001074		9.49562	9.67858	9.70568	9.74511	9.70906	9.96187	9.79742	9.62213	10.5373	10.2581	10.2866	10.0584	9.6823	9.60183	9.89015	10.529	10.2094	10.2564	10.1539	10.3037	10.3482	10.5927	10.5455	11.0143	10.8985	10.3598	10.1343	11.1532	11.1952	10.7628	10.6879	10.2065	10.3747	10.1542	10.4647	11.0839	10.7343	10.7687	10.5363	10.4457	10.5563	tan	0.594798	0.524266	0.231539
Ec-00_009110	Zinc finger, DHHC-type, palmitoyltransferase	Protein binding or modification	OG0001075		7.25074	6.44554	8.19361	7.8975	7.90159	7.90579	8.28608	7.86768	9.10728	8.50152	8.83572	8.28455	7.83436	7.97714	7.91127	8.75264	8.5971	7.8407	8.00485	8.54611	8.63269	8.56058	8.27071	9.30543	9.17519	8.31024	8.27139	9.40425	9.50997	8.75979	8.59208	8.5494	8.89207	8.46157	8.93441	9.11395	9.76724	9.79748	9.29777	9.48645	9.79217	blue	0.55615	0.447968	0.247059
Ec-00_009120	expressed unknown protein	Unknown	OG0019814		14.8473	14.8776	10.0973	10.6192	10.4728	9.97243	9.73168	9.69483	10.0539	9.79034	9.8766	9.06539	9.20326	9.26326	8.80035	9.02444	9.06714	9.09726	9.44335	9.08248	9.29738	8.76761	8.68458	8.56446	8.35159	8.20906	8.09848	8.55892	8.68982	8.87437	8.81623	8.75709	8.92717	8.99355	9.29423	8.58988	8.49562	9.808	9.98019	9.7461	9.90171	green	-0.549661	-0.10881	-0.0399537
Ec-00_009130	hypothetical protein	Unknown	OG0019815		11.2785	11.022	4.57119	4.76121	5.33632	4.84987	4.37978	4.62355	3.24728	4.06791	3.33452	3.95843	4.10692	4.44065	4.39076	4.0573	4.72763	4.29112	4.62726	5.6838	5.46791	5.24588	4.78677	4.07404	2.91943	6.03334	6.17206	2.96555	3.87637	7.0606	7.28662	3.70062	3.95656	4.57847	4.57954	3.19117	3.87637	6.57628	6.40326	6.04183	5.89796	green	-0.191813	0.189891	0.202415
Ec-00_009140	expressed unknown protein	Unknown	OG0019816		7.86043	6.44554	9.25639	9.28606	8.81323	9.06942	8.47471	8.78946	8.94764	8.75953	8.6846	7.16383	7.13608	7.29611	7.06805	7.98009	7.45647	7.77229	7.4776	7.06761	7.15991	8.05922	8.41423	8.64992	8.86571	7.85782	7.29621	8.91387	8.53874	6.71644	7.06457	7.30945	6.81718	7.36463	7.29681	9.23086	7.61993	7.62927	7.70013	7.89767	7.84784	turquoise	-0.541848	-0.269058	-0.493435
Ec-00_009150	hypothetical protein	Unknown	OG0019817		0	0	0	0	0	0	0	0	0	0	0	0	0	1.3749	0	0	0	1.21845	0	0	0	0	0	0	0	0	0	0	0	0	0	0	0	0	0	0	0	0	0	0	0	NA	NA	NA	NA
Ec-00_009160	hypothetical protein	Unknown	OG0019818		0	0	0	0	0	0	0	0	0	0	0	0	0.462012	0	0.41463	0	0	0	0	0	0	0	0	0	0	0	0	0	0	0	0	0	0	0	0	0	0	0	0	0	0	NA	NA	NA	NA
Ec-00_009170	hypothetical protein	Unknown	OG0019819		0	0	0	0	0	0	0	0	1.4325	0	0	0.467569	0.462012	2.88244	3.45795	0	0	0	0	0	0	0	0	1.21426	1.85845	0.633432	0.904947	0	0.752151	0	0	0	0	0	0	0	0	0	0	0	0	NA	NA	NA	NA
Ec-00_009180	hypothetical protein	Unknown	OG0019820		0	0	0	0	0	0	0	0	0	0	0	0	0	0	0	0	0	0	0	0	0	0	0	0	0	0	0	0	0	0	0	0.848085	0.489014	1.33694	0.460032	0	0	0	0	0	0	NA	NA	NA	NA
Ec-00_009190	conserved unknown protein	Unknown	OG0019821		0	0	0	0	0	0	0	0	0	0	0	0	0	0	0	0	0	0	0	0	0	0	0	0	0	0	0	0.812953	0	0	0	0	0.489014	0	0.808298	0	0	0	0	0	0	NA	NA	NA	NA
Ec-00_009200	Phosphate transporter	Membrane function and transporters	OG0019822		10.4309	10.7426	8.94675	8.45138	8.43897	8.64211	9.16428	8.62155	8.16217	8.23824	9.01536	8.48126	8.2977	7.78205	8.11732	7.70666	8.77136	8.3667	8.03262	9.75098	9.24914	8.31236	8.14076	7.61273	6.70152	8.69117	9.81881	6.40948	6.62725	9.62743	9.86568	9.18359	8.96494	9.12028	8.16773	7.29986	8.84815	9.67641	8.76936	9.27306	8.15947	green	-0.162303	0.0880662	0.0261424
Ec-00_009210	hypothetical protein	Unknown	OG0019823		0	0	0	0	0	0	0.993432	0	2.6082	1.21055	1.33033	0.467569	0	0	0.41463	1.69398	0	0	0	0.964221	0.95637	0	0	0	0	1.90929	0.904947	0	1.24404	1.62442	0.83311	1.37863	0	0	0.460032	3.19117	0	0	1.65288	1.20016	0	NA	NA	NA	NA
Ec-00_009220	conserved unknown protein	Unknown	OG0019824		10.9618	10.649	10.4306	10.6504	10.514	10.4286	9.56805	9.5122	8.21262	8.98207	9.09743	7.94238	8.40922	8.24681	8.13109	9.25041	9.22605	9.37031	9.22001	9.21536	8.89455	6.91126	7.18406	7.825	7.13122	9.58353	9.48293	7.37489	7.88926	9.45146	9.51669	8.7664	8.73427	8.39989	8.10417	8.97512	9.24949	8.63156	8.34832	8.55468	8.91095	tan	-0.675624	-0.0981834	-0.30723
Ec-00_009230	expressed unknown protein	Unknown	OG0019825		8.47974	8.75416	9.45669	9.48321	9.31025	8.73928	8.88471	9.06192	8.14495	8.50152	9.28775	6.60674	6.42507	6.01658	6.31429	7.75971	7.78303	7.54516	7.6217	7.39556	7.33817	7.34868	7.27537	8.36226	7.06202	7.38307	7.31214	7.35502	7.63491	7.34568	7.13042	6.58215	6.68199	5.86999	6.7301	7.99533	7.86828	7.31212	7.09995	7.45027	6.16938	brown	-0.847988	-0.342961	-0.653845
Ec-00_009240	P-loop containing nucleoside triphosphate hydrolase	Metabolism	OG0006824		5.50776	5.05783	5.01398	5.63447	6.18883	5.39313	4.94146	5.23993	2.13694	3.15146	2.0105	7.45885	7.56781	6.21531	6.9409	5.01331	4.23621	3.16378	4.20738	7.83473	7.60531	3.78545	4.17809	8.01738	7.19725	6.4967	5.76078	7.10833	7.66441	6.07136	6.18009	6.89986	7.79251	6.47586	7.2298	6.94255	4.8264	7.18876	7.53478	8.36896	9.27422	turquoise	0.386882	0.666236	0.890856
Ec-00_009250	hypothetical protein	Unknown	OG0019826		9.47772	9.38525	1.27694	3.54657	2.97312	1.97463	2.79608	3.15114	3.48477	2.92054	3.71335	7.47756	6.95041	6.5941	7.79062	3.46723	4.02652	4.29112	3.99795	7.91082	7.57716	2.39589	3.39248	6.99707	6.88099	6.45198	5.39254	6.30288	6.48018	6.36914	5.95323	9.66233	9.06832	7.17957	7.22619	9.61069	7.64973	5.26469	6.60744	5.98385	6.26895	turquoise	0.497288	0.732238	0.807005
Ec-00_009260	hypothetical protein	Unknown	OG0019827		0	0	0	0	0	0	0	0	0	0	0	0	0	0	0	0	0	0	0	0	0	0	0	0	0	0	0	0	0	0	0	0	0	0	0	0	0	0	0	0	0	NA	NA	NA	NA
Ec-00_009270	Hypothetical protein	Unknown	OG0019828		0	0	2.74265	3.54657	2.97312	3.96821	4.30942	2.64517	0	0	0	0	0	2.06591	0	3.95704	4.13517	4.55817	3.8806	1.94599	2.51149	0	0	0	0	0	0	0	0	0	0	0	0	0	0	3.19117	1.24404	0	1.05124	1.20016	2.03061	NA	NA	NA	NA
Ec-00_009280	Hypothetical protein	Unknown	OG0019829		0	0	3.78756	3.21885	2.97312	5.62496	3.5729	4.1764	0	0	0	0	0	0	0	4.32204	3.48516	2.93259	3.45744	2.52483	3.3791	0	0	0	0	0	0	0	0	0	0	0	0	0	0	4.88105	2.69475	3.1922	4.48839	3.1352	1.02048	black	-0.351732	-0.191364	-0.351616
Ec-00_009300	Hypothetical protein	Unknown	NA		6.49182	6.76415	8.13638	7.43584	7.57858	8.56048	7.99251	8.16049	5.91815	4.46128	6.04719	6.56068	7.2406	7.7663	7.2336	6.60178	6.9469	6.65137	6.40298	5.60141	6.40425	8.13411	8.11132	8.63802	8.92342	8.64424	7.83742	8.49378	9.09198	7.0785	7.19725	6.8507	6.33068	6.39967	7.06558	7.9003	7.62993	7.08878	6.88119	7.41779	7.66982	grey	-0.118746	0.151993	0.124272
Ec-00_009290	Heat shock protein 70	Stress response	OG0019830		9.58192	10.0002	11.5778	10.7282	11.1717	11.2512	11.7409	11.9339	10.0022	9.68832	10.707	10.6123	10.7294	10.5474	10.6186	10.2572	10.7668	10.4078	10.0405	10.1791	10.1025	11.1675	11.1043	10.8168	10.4108	10.8149	11.1707	10.2084	11.0486	10.4948	10.7103	10.6539	10.6119	10.1484	10.4578	10.1467	10.7743	10.4805	10.4113	10.5716	10.86	magenta	-0.338749	-0.271794	-0.254511
Ec-00_009310	Domain of unknown function DUF4033	Unknown	OG0019831		4.23263	4.49436	3.02081	2.18955	3.49551	3.82641	2.98849	4.27761	2.13694	1.21055	1.33033	2.57921	3.97462	3.60341	3.9681	2.12208	2.27029	3.36299	2.58314	5.01718	5.58559	4.94678	5.21352	6.59568	6.18117	4.86363	5.50768	6.04625	5.90328	3.84121	3.7965	6.0047	5.45185	5.15351	4.57954	6.79185	6.44662	3.6318	4.09462	3.33394	2.03061	salmon	0.301857	0.656535	0.501596
Ec-00_009320	telomerase reverse transcriptase catalytic subunit	RNA modification or binding	OG0019832		0	0	1.94355	0	1.43994	2.43173	1.99014	1.21034	3.68863	1.85938	3.09981	2.48371	2.81545	3.1647	3.11403	0	2.27029	2.3164	1.80579	1.53706	2.25147	1.27561	3.1045	2.79514	2.78846	4.17702	3.21545	2.25822	2.53359	2.68174	2.50821	2.07054	1.59332	2.60577	1.70196	3.48116	1.24404	0	2.07619	1.20016	0	NA	NA	NA	NA
Ec-00_009340	Membrane-associated protein	Membrane function and transporters	OG0006413		6.86662	6.90045	8.2006	8.20666	8.01102	7.7864	8.3088	8.74155	6.90617	6.94516	7.76546	8.79773	8.8502	8.60369	8.70458	7.05412	8.24371	7.28775	7.53698	8.23155	8.39141	8.44769	8.72401	7.68393	8.0459	8.41181	9.16545	7.75444	7.79905	9.38108	9.43272	9.17562	8.88593	9.20728	8.97374	7.24289	8.81785	8.80436	8.65504	8.89857	8.39369	blue	0.402418	0.270106	0.412868
Ec-00_009350	Heat shock protein 40 like protein	Stress response	OG0004396		10.155	10.3842	9.66831	9.74711	9.79503	9.04161	8.73506	9.54556	9.98782	9.92711	9.1713	8.75491	8.47192	8.68971	8.83442	9.55696	9.40761	9.19196	9.01253	9.11254	9.11366	9.14246	8.9625	9.42385	9.22035	9.5679	9.22871	9.61525	9.65539	9.10799	9.20809	9.07434	8.94618	9.06517	8.87449	9.797	10.0743	9.43311	9.44708	9.15652	9.58944	red	-0.440611	0.148078	-0.233926
Ec-00_009355	hypothetical protein	Unknown	OG0000004		15.6854	15.6822	11.3411	11.7553	11.39	11.084	11.036	11.5314	9.96592	10.0768	10.8441	10.8012	10.7236	10.4206	11.0611	10.2807	10.1891	10.4739	10.3556	10.386	10.4641	10.7293	10.7615	10.2952	9.97183	11.0374	10.9297	9.99601	9.81844	9.87539	10.1138	10.6308	10.4436	10.6579	10.0658	10.936	10.7459	9.13612	8.95225	9.11322	8.81865	tan	-0.593626	-0.124515	-0.106666
Ec-00_009360	NB-ARC and TPR containing protein	Defence	OG0019833		7.4102	6.61362	2.74265	4.03859	5.80268	3.96821	2.98849	4.27761	5.197	6.36604	4.74138	4.62832	2.96242	3.93936	3.66146	6.80292	7.00533	2.93259	3.6127	4.78807	4.91423	6.28048	6.30213	7.82079	7.76593	6.27843	6.14564	7.98739	7.92625	6.84748	6.5784	5.38562	5.6847	5.34624	5.21159	6.433	6.76977	7.76503	7.91406	7.21852	8.06288	lightgreen	0.340688	0.557546	0.362181
Ec-00_009370	Homeodomain-like	Transcription	OG0019834	TAP	15.9482	16.0172	9.59586	10.26	10.8648	9.77668	9.35099	9.74208	9.30237	9.23899	9.99268	8.77774	9.20603	8.70081	9.00212	9.58662	8.49885	9.28081	9.18949	8.95282	8.99636	9.63543	9.82259	9.32635	9.72559	8.66005	8.23634	9.88377	9.76951	7.78508	7.8503	9.27493	9.18192	9.58236	9.46189	9.65139	8.73222	9.1066	8.91748	9.33234	8.83824	blue	-0.505977	-0.0203127	0.0171963
Ec-00_009380	hypothetical leucine rich repeat protein	Cellular regulation and signalling	OG0019835		0	0	0	0	0	0	0	0	0	0	0	0	0	0	0	0	0	0	0	0	0	1.27561	0	0	1.20982	0	0	0	0	0	0	0	0	0	0	0	0	0	1.05124	1.20016	0	NA	NA	NA	NA
Ec-00_009390	Pectin lyase fold/virulence factor	Cell wall and extracellular	OG0000078		4.79178	5.77737	3.45454	3.392	2.14606	3.05756	0.993432	1.21034	0	0	2.47088	6.25564	5.20394	8.26934	7.49822	5.32628	5.38514	3.16378	3.28344	6.21389	5.84361	7.02582	7.10661	9.18134	8.5667	5.89318	7.10373	9.3145	9.34822	10.1696	10.1025	10.6504	9.03652	10.448	10.1502	10.5737	7.25658	9.99454	10.635	10.4763	10.3467	turquoise	0.70552	0.739221	0.796079
Ec-00_009400	Hypothetical protein	Unknown	NA		0	0	0	1.12909	0	1.30166	0	0	0	0	0	0	0	0	0	0	0	0	0	0	0	0	0	0	0	0	0	0	0	0	0	0	0	0	0	0	0	0	0	0	0	NA	NA	NA	NA
Ec-00_009410	Ferric reductase transmembrane component-like domain	Membrane function and transporters	OG0000033		3.3074	3.55699	2.39774	2.18955	0	0	1.5762	0	6.61252	6.59903	4.47278	2.7531	1.70698	3.03046	3.80584	1.08252	1.8276	6.18301	5.95785	8.84357	8.43519	0	0	2.65096	3.15032	1.68033	3.72407	0.812953	0	2.58488	2.69391	3.45961	1.38623	5.84467	2.24966	5.75136	7.20399	2.0895	0	1.84612	1.02048	grey	0.190257	0.137361	-0.0594182
Ec-00_009420	Ferric reductase, NAD binding	Metabolism	OG0000033		0	0	0	0	0	0	0.993432	0	3.86722	5.1363	0	0.467569	0	0	0	0	0	0	0	0.964221	0.95637	0	0	0	0	0	0	0	0	0	0	0	0	1.33694	0	0	1.24404	0	0	0	0	NA	NA	NA	NA
Ec-00_009425	lncRNA	Unknown	NA		4.79178	4.49436	3.02081	1.12909	2.14606	3.66915	2.574	1.85911	0	1.85938	0	5.06764	3.86677	5.00329	5.36764	4.47489	4.79543	2.93259	2.58314	6.19528	5.95716	4.65289	4.57306	5.93239	6.41003	6.76147	6.90801	6.4967	6.1032	5.92075	5.81987	5.32932	4.60894	6.22426	5.10542	6.56279	7.60985	6.42048	5.95702	5.4536	4.20836	brown	0.598575	0.715329	0.678679
Ec-00_009430	Hypothetical protein	Unknown	OG0019836		3.3074	3.55699	3.78756	3.54657	2.14606	5.49038	5.19665	2.92022	6.21069	5.74336	4.01311	1.10322	3.0958	0	0.999185	1.69398	2.27029	2.93259	3.28344	4.78807	5.04327	0	1.53617	2.49076	0	1.07211	2.53571	0.812953	0.752151	3.28531	2.85841	3.60899	2.44317	1.01252	2.24966	4.10995	3.5788	1.39397	1.05124	1.20016	0	grey	-0.409862	-0.154595	-0.453936
Ec-00_009435	lncRNA	Unknown	NA		9.54801	9.67858	9.53627	9.32664	8.77988	9.56695	8.61258	8.54749	8.66319	8.14084	8.00545	9.77672	9.50553	10.2145	10.0986	8.4955	8.79225	9.07614	9.17399	9.11748	9.27565	9.55049	9.58983	10.2792	10.6542	9.62743	8.7432	10.7505	10.5378	10.0352	9.93585	9.28976	9.49672	9.88676	10.2054	9.96491	8.79135	10.0924	9.9508	9.71079	7.98302	turquoise	0.309769	0.47088	0.618349
Ec-00_009437	lncRNA	Unknown	NA		0	0	4.28557	4.8823	4.03719	6.95502	6.51054	5.51328	7.57973	8.09996	6.34473	5.78061	6.19914	5.60895	4.68026	6.83152	5.73509	5.35081	5.26466	1.94599	2.25147	6.69087	7.59189	3.44647	3.15032	0	0	4.85807	3.87637	0	0	1.37863	0.489014	1.01252	0.460032	0	0	0	0	0	0	lightyellow	-0.328733	-0.849025	-0.64913
Ec-00_009438	lncRNA	Unknown	NA		0	0	3.63064	4.40481	3.87821	6.79292	6.42993	5.42779	5.95813	6.11565	6.26173	4.98287	5.4101	5.96231	4.5834	0	0	0	0	0	0	4.65289	5.41972	0	0.728178	1.68033	0	0.812953	2.14454	0	0	1.37863	0.489014	0	0	0	0	0	0	0	0	salmon	-0.445906	-0.706236	-0.471568
Ec-00_009440	Ribonuclease H-like domain	RNA modification or binding	OG0000577		0	3.55699	3.25392	4.82303	4.18038	7.17575	6.54156	5.28924	6.7555	6.78245	7.29466	4.91126	5.65671	6.81435	6.77974	7.65959	7.06148	5.56814	5.31075	2.74547	4.08637	7.44595	7.48882	2.10452	1.85845	1.90929	0.904947	0.812953	1.90196	0	0.475874	2.07054	3.04662	3.34438	3.0243	0	0	0	0	0	0	salmon	-0.288551	-0.871813	-0.619292
Ec-00_009450	Armadillo-type fold	Cellular regulation and signalling	OG0019837		10.1884	10.3725	8.86983	9.35307	9.35245	9.05757	8.56807	9.00403	9.45337	9.7839	9.56375	7.08468	6.82153	7.11725	7.44959	7.18178	6.87038	7.86554	7.96936	7.76706	7.76352	7.05694	7.14586	6.34931	6.16806	5.32693	4.74082	6.35717	7.30733	4.60477	5.28184	7.2116	7.08924	6.71818	6.91208	8.72773	7.48316	5.93631	6.45708	5.6528	6.56379	blue	-0.720367	-0.451663	-0.48633
Ec-00_009460	hypothetical protein	Unknown	OG0019838		8.47974	8.52029	9.52795	8.12925	8.50168	7.4661	7.22533	8.24414	7.25005	7.27397	6.72121	6.04597	6.62589	6.03423	5.27143	4.23908	5.24669	3.538	3.45744	3.63368	5.19912	5.88901	5.9934	6.88067	6.20705	3.12392	2.82931	6.11087	7.36237	3.88255	3.26254	4.59713	6.18627	4.51568	6.70435	3.19117	2.97141	4.47015	3.67755	3.33394	3.62229	brown	-0.735687	-0.402629	-0.238425
Ec-00_009480	hypothetical protein	Unknown	OG0019839		5.9841	7.02497	0	3.93041	2.97312	0	0	1.85911	0	0	0	4.65048	3.0958	1.3749	2.66159	1.08252	0	1.21845	1.80579	6.74837	6.40425	0	0	4.81067	5.2639	4.34297	5.45126	6.52068	5.74662	7.02412	6.05849	9.1238	7.21993	6.53245	8.37778	10.8061	8.2965	4.92144	6.16535	5.36553	5.99422	salmon	0.406469	0.903768	0.754824
Ec-00_009490	Pectin lyase fold protein	Cell wall and extracellular	OG0019840		7.68436	7.68385	0	3.54657	1.43994	0	0.993432	1.85911	0	0	0	5.78061	4.46844	0.845388	2.99857	1.08252	1.8276	1.86945	3.28344	9.32639	8.94773	1.94186	2.74432	4.59119	4.58371	5.58064	7.63384	6.04625	5.69037	10.0021	9.56364	12.0249	10.5355	8.43848	10.4535	10.0421	8.83091	6.84499	8.30496	8.14257	7.54029	salmon	0.521188	0.862354	0.75099
Ec-00_009500	Methyltransferase type 11	Metabolism	OG0000170		7.68436	7.34468	9.68836	10.6955	9.99476	9.31485	10.0993	9.79852	12.3505	13.0713	12.1596	11.7579	11.2155	11.9571	12.4097	13.415	12.7025	12.9494	12.4035	12.6512	12.551	11.878	11.9447	10.8398	11.1827	12.1132	11.996	11.3522	10.8258	11.3743	11.6499	11.8325	11.0617	12.3921	10.593	12.8046	11.7176	11.9044	11.8128	12.0896	11.2797	pink	0.628728	-0.0608068	-0.101033
Ec-00_009510	expressed unknown protein	Unknown	OG0019841		6.62786	6.03601	8.17951	9.44686	8.45315	7.66667	8.86031	8.5726	11.288	11.4915	11.0311	10.0364	9.43412	10.4934	10.7257	11.2566	9.91203	10.4739	10.0592	9.96378	10.4003	11.125	11.3882	11.3606	11.8561	10.5114	9.53306	11.7161	11.4966	8.7584	8.90005	9.9389	9.02428	10.7149	9.25575	11.9871	9.89509	9.30158	9.19857	9.50975	8.55626	purple	0.469013	-0.0295443	-0.0845417
Ec-00_009520	hypothetical protein	Unknown	OG0019842		0	0	1.27694	0	0	0	0.993432	1.21034	0	1.21055	2.0105	0.467569	0	0	0.736313	0	0	6.40256	1.16871	0.964221	0	0	0	0.731276	1.85845	3.58797	2.42287	1.32976	0	1.16987	0.83311	1.92615	1.14434	2.01874	1.525	0	0	0	1.05124	1.84612	1.02048	grey	0.193706	0.118603	-0.0577463
Ec-00_009530	hypothetical protein	Unknown	OG0019843		0	0	0	0	0	0	0	0	0	0	0	0	0	0.845388	0.41463	0	0	0	0	0	0.95637	0	0	0	0	0	0	0	0	0	0.475874	0	0	0	0	0	0	0	0	0	0	NA	NA	NA	NA
Ec-00_009540	expressed unknown protein	Unknown	OG0019844		5.19374	5.05783	6.73228	6.93187	7.16175	7.99134	7.54149	6.9448	7.69067	7.97741	7.28068	5.14771	5.15892	5.56106	5.78848	4.23908	3.48516	4.9782	5.5601	4.51559	4.82131	4.05581	3.63244	5.97843	4.69759	3.44923	3.40562	5.10011	5.08094	2.68174	2.69391	5.50481	4.98481	4.80539	5.10542	6.25239	4.95927	3.42868	3.79365	3.66436	4.43108	blue	-0.629958	-0.402169	-0.444695
Ec-00_009550	Hypothetical protein	Unknown	OG0019845		0	0	3.02081	4.62902	5.27381	5.39313	5.19665	4.54453	0	0	0	0.467569	0	0	0.41463	3.73282	1.8276	1.21845	4.55249	0	1.52649	0	0	0	0	0	0	0	0	0	0	0	0	0	0	3.92919	3.20345	1.39397	2.07619	3.1352	2.84228	NA	NA	NA	NA
Ec-00_009560	expressed unknown protein	Unknown	OG0019846		0	0	0	0	2.61807	1.30166	1.5762	1.85911	0	0	0	1.10322	0.462012	0	0.41463	0	0	0	0	0	0	0	0	0.731276	0	0	0	0.812953	0	0	0	1.37863	0.853573	0	0.460032	0	1.24404	0	0	0	0	NA	NA	NA	NA
Ec-00_009570	Hypothetical protein	Unknown	NA		0	0	0	0	0	0	0	0	0	0	0	0	0	0	0	0	0	0	0	0	0	0	0	0	0	0	0	0	0	0	0	0	0	0	0	0	0	0	0	0	0	NA	NA	NA	NA
Ec-00_009580	hypothetical protein	Unknown	OG0019847		0	0	0	0	0	0	0	0	0	0	0	0	0	0	0	0	0	0	0	0	0	0	0	0	0	0	0	0	0	0	0	0	0	0	0	0	0	0	0	0	0	NA	NA	NA	NA
Ec-00_009590	conserved unknown protein	Unknown	OG0019848		0	0	0	0	0	0	0	0	0	0	1.33033	0	0	0	0	0	0	0	0	0	0	0	0	0	0	0	0	0	0	0	0	0	0	0	0	0	0	0	0	1.84612	0	NA	NA	NA	NA
Ec-00_009600	expressed unknown protein	Unknown	OG0000331		10.5976	10.2374	7.57207	8.35528	7.38517	6.71458	6.65939	6.36568	8.196	8.68316	9.15989	6.49485	6.25724	6.62936	6.18161	8.42218	7.26649	6.25997	5.67028	4.01936	3.82435	8.86755	8.63027	5.22133	5.16176	2.57562	2.42287	5.43899	4.33346	1.80728	2.85841	5.66126	6.16209	6.42552	5.18205	4.27056	5.02138	1.39397	0	2.90463	2.03061	blue	-0.570036	-0.638187	-0.505773
Ec-00_009610	hypothetical protein	Unknown	OG0019849		9.08716	8.92372	6.45645	4.40481	4.03719	3.05756	3.15823	2.64517	3.68863	5.08136	3.09981	3.64193	3.79012	3.69502	3.58347	4.40049	2.27029	3.83488	4.62726	2.26425	3.61883	1.94186	2.74432	2.10452	3.34931	0.633432	1.85496	2.65481	2.8397	2.1154	2.50821	2.53622	2.89836	2.47986	2.95611	3.92919	2.35214	2.0895	2.07619	2.63008	2.03061	blue	-0.553144	-0.229919	-0.140236
Ec-00_009620	eukaryotic initiation factor 4G	Protein synthesis	OG0001796		9.66334	9.71601	11.9817	11.8193	11.9075	11.0967	11.3952	12.2112	11.4753	11.7993	11.9776	11.8806	11.582	11.6535	11.994	12.0009	12.7529	11.8295	11.7443	11.6808	11.67	12.2621	12.2988	11.5013	11.5224	12.5076	12.3386	11.895	11.4433	12.0793	12.1919	11.8125	11.3627	12.2439	11.7526	12.3562	12.8366	12.2982	12.2053	12.1101	12.3589	blue	0.370937	-0.0275555	-0.150258
Ec-00_009630	Hypothetical protein	Unknown	NA		3.3074	0	2.39774	3.21885	3.49551	2.43173	2.574	1.85911	1.4325	0	2.0105	0	0.462012	1.76139	0	0	2.27029	1.21845	0	0	1.52649	2.39589	2.26318	1.86411	1.20982	2.92885	1.66957	2.25822	0.752151	1.80728	1.90123	0.485483	0.489014	2.01874	2.13098	1.60093	3.20345	0	1.65288	0	1.02048	NA	NA	NA	NA
Ec-00_009640	conserved unknown protein	Unknown	OG0019850		0	0	3.25392	2.79411	2.14606	1.97463	2.79608	2.30503	5.38472	2.30532	1.33033	0	0.462012	3.40067	5.23363	4.85516	0	3.69406	0	0	0	0	0	3.04635	2.91943	3.93852	0	4.01222	3.87637	0	0	0.848085	1.14434	0.59332	0	0	0	0	0	0	0	NA	NA	NA	NA
Ec-00_009650	Carbohydrate-binding WSC	Cell wall and extracellular	OG0019851		0	4.49436	1.27694	1.12909	0	1.97463	0	1.21034	0	1.85938	0	3.45315	4.19875	5.2944	3.9681	1.08252	0	1.21845	0	2.26425	3.24242	0	0	0	2.09853	0	0	0.812953	0	0	2.17532	0	0.489014	0	0.808298	0	0	0	0	0	1.02048	NA	NA	NA	NA
Ec-00_009655	lncRNA	Unknown	NA		0	3.55699	3.02081	4.32159	3.25783	6.45027	6.30893	4.76969	6.61252	6.0019	6.89651	3.76889	5.11245	5.2648	3.87295	5.4787	5.38514	4.85131	4.76608	2.26425	0	5.13357	5.48238	1.21426	0.728178	1.07211	0	0.812953	0	0	0	1.13761	0	0.59332	0	0	1.24404	0	0	0	0	salmon	-0.428693	-0.914408	-0.748195
Ec-00_009660	expressed unknown protein	Unknown	OG0019852		0	0	3.45454	3.68618	1.43994	6.92054	6.99816	4.69847	2.6082	0	2.0105	2.38144	2.73594	4.14826	4.22085	6.32839	6.01651	6.25997	5.5601	3.10569	2.51149	2.39589	1.53617	2.31053	1.57029	0	0.904947	1.32976	0	0	0	4.93565	5.19009	4.72442	3.61673	6.56279	2.35214	1.39397	0	0	0	grey	-0.12604	-0.346873	-0.323737
Ec-00_009670	hypothetical protein	Unknown	OG0019853		0	0	0	0	0	0	0	0	0	0	0	7.45256	6.91475	8.9605	9.09991	0	0	0	1.16871	3.3937	5.00153	0	0	0.731276	2.6444	5.59716	4.56586	2.25822	0.752151	0	1.11921	3.10451	4.48444	2.47986	0.460032	0	0	0	0	0	0	darkred	0.361186	0.045371	0.455187
Ec-00_009680	Rhodanese-like domain	Metabolism	OG0006935		11.1823	10.8391	10.7508	10.8296	10.8701	10.263	10.3133	10.4145	11.5327	11.4074	11.476	10.395	10.506	10.4214	10.4852	11.0208	11.4402	10.8937	10.8751	10.7902	10.7608	10.7426	10.6903	10.8351	10.5232	11.0558	11.0485	10.796	10.8565	11.0247	11.0296	10.7996	10.8155	10.4616	10.6229	11.1331	11.8683	11.1764	11.1437	11.0779	11.2434	midnightblue	0.130694	0.141672	-0.247305
Ec-00_009690	hypothetical protein	Unknown	OG0006934		4.79178	0	0	1.12909	3.25783	0	0	2.30503	0	1.85938	0	5.88709	6.31993	5.07325	5.04281	1.08252	0	0	1.16871	6.28599	5.77093	0	1.53617	4.23442	3.8863	5.15902	4.53904	3.43809	3.94208	3.61462	4.24603	5.3436	6.02578	5.15351	5.83188	3.48116	2.69475	3.96828	4.85199	6.06997	5.92263	turquoise	0.562513	0.629883	0.872027
Ec-00_009700	exonuclease I Exo1	DNA or chromatin modification	OG0000039		0	0	1.94355	1.12909	2.14606	0	0	1.21034	0	0	0	0	0	0	0	0	0	0	0	0	0	0	0	0	0	0	0	0	0.752151	0	0	0	0	0	0	0	0	0	0	0	0	NA	NA	NA	NA
Ec-00_009710	Carbohydrate-binding WSC	Cell wall and extracellular	OG0019854		0	0	0	0	0	0	0	0	0	0	0	4.21783	4.04229	5.6553	4.50094	0	0	0	0	0	1.93405	1.94186	1.53617	2.31053	1.57029	0	0	0	1.24404	0	0.83311	1.37863	0.853573	0	0.460032	1.60093	0	0	0	0	0	darkred	0.309683	-0.143551	0.371707
Ec-00_009720	expressed unknown protein	Unknown	OG0000083		0	0	1.27694	0	1.43994	1.97463	0	0	0	0	0	0	0.811408	2.06591	2.50116	0	0	2.65715	1.80579	0.964221	0	1.27561	0	0.731276	1.85845	0	0	0	0	0	0	0.485483	0	0	0	1.60093	0	0	0	0	0	NA	NA	NA	NA
Ec-00_009730	Hypothetical protein	Unknown	OG0019855		0	0	0	0	1.43994	0	0	0	0	0	0	7.55007	7.55917	7.0054	8.23837	1.08252	3.11244	1.86945	2.8561	3.51868	4.95854	4.17409	4.97287	3.15725	2.6444	4.41929	4.42648	0	2.53359	3.79865	3.87545	6.04895	5.0911	5.13274	5.0736	0	0	3.80983	4.00111	4.35508	2.61893	turquoise	0.644935	0.12715	0.578447
Ec-00_009740	Zinc finger, CCHC-type	Cellular regulation and signalling	OG0019856		4.79178	4.49436	3.92908	4.03859	2.61807	2.43173	1.5762	1.21034	2.13694	2.64548	2.47088	0.467569	0	0	0	0	0	0	0	0	0	0	0	1.21426	2.09853	0	0	2.00978	1.61018	0	0	0	0.489014	1.01252	0.808298	0	0	0	0	0	0	NA	NA	NA	NA
Ec-00_009750	cupin-like protein	Unknown	OG0019857		5.9841	6.76415	6.35976	6.70442	6.349	5.9666	7.55676	4.37218	3.48477	3.95017	0	3.55063	6.32673	2.06591	1.73582	1.69398	0	0	2.58314	2.26425	2.73173	1.27561	2.74432	2.49076	2.48435	1.90929	1.20709	0.812953	0	1.41498	0	3.70062	4.22908	1.01252	3.93279	0	1.90196	0	1.05124	0	0	brown	-0.727174	-0.310625	-0.179077
Ec-00_009760	conserved unknown protein	Unknown	OG0019858		0	0	0	0	0	0	0	0	0	0	0	0	0	0	0	0	0	0	0	0	0	0	0	0	1.57029	0	0	0	0	0	0	0.485483	0	0	0	0	0	0	0	0	0	NA	NA	NA	NA
Ec-00_009770	hypothetical protein	Unknown	OG0019859		0	0	0	0	0	0	0	0	0	0	0	0.467569	0.462012	0	0.41463	0	0	0	0	0	0	0	0	0	0	0	0	0	0	0	0	1.37863	0	0	0	0	0	0	0	0	0	NA	NA	NA	NA
Ec-00_009775	lncRNA	Unknown	NA		9.66334	9.80554	8.73658	8.68155	8.0857	8.17807	7.8261	7.33359	8.44139	9.01908	8.08002	7.48066	7.86738	8.49637	7.90326	7.29905	5.76921	8.35505	8.54278	6.78615	7.22484	7.74248	7.87486	9.04195	9.12517	8.47576	7.22227	8.82998	8.97913	6.86306	6.94154	7.58366	6.26407	7.18463	5.90605	6.84385	3.5788	7.05385	7.19804	6.94228	6.48315	blue	-0.422438	-0.229311	-0.117383
Ec-00_009780	Hypothetical protein	Unknown	OG0019860		0	4.49436	2.74265	3.54657	2.61807	4.92137	4.30942	4.62355	5.197	5.70753	4.96773	4.51212	4.63111	4.7277	4.47957	4.79835	4.02652	3.83488	4.47364	4.73754	3.72525	5.13357	5.21352	7.47499	7.16461	5.44116	4.69296	6.61281	7.01847	4.67704	4.84519	5.53001	5.41139	5.29107	5.68164	6.84385	5.48527	4.47015	4.62004	3.66436	3.03565	red	0.446282	0.320278	0.166156
Ec-00_009790	Hypothetical protein	Unknown	NA		0	0	0	0	0	1.97463	0	0	0	0	0	0	0	0	0	0	0	0	0	0	0	0	0	0	0	0	0	0	0	0	0	0	0	0	0	0	0	0	0	0	0	NA	NA	NA	NA
Ec-00_009800	expressed unknown protein	Unknown	OG0019861		0	0	0	1.12909	0	0	0.993432	2.64517	4.63157	3.35047	2.47088	3.11363	2.00709	2.31723	2.22111	0	0	1.86945	0	0.964221	1.52649	0	0	3.15725	4.0667	0.633432	0	3.22108	1.61018	0	0.475874	2.53622	2.44317	2.47986	2.35932	2.34107	0	0	0	0	0	NA	NA	NA	NA
Ec-00_009810	expressed unknown protein	Unknown	OG0000225		5.9841	5.462	4.73436	5.66854	5.50907	6.1857	6.27241	5.97165	8.00883	8.12054	7.97971	6.86541	6.24293	6.95069	7.293	7.82517	6.83859	7.77229	7.6033	8.28531	7.92296	7.43414	7.27537	9.57259	9.40772	8.55824	8.73731	9.23882	9.37226	8.87437	8.64796	9.72027	9.11	8.63958	8.5895	10.2515	8.68982	7.99417	8.44471	7.66842	7.87338	brown	0.759391	0.681119	0.397406
Ec-00_009830	Hypothetical protein	Unknown	OG0019862		4.23263	0	5.19303	5.56381	4.91277	6.52102	5.34471	5.28924	4.63157	5.08136	4.89615	5.08402	5.99228	6.49563	6.11387	4.32204	3.90901	5.03769	5.26466	5.21484	4.95854	3.01882	3.39248	3.82804	3.82078	3.02968	3.62553	3.33366	4.17852	3.34569	3.48024	5.95904	5.56684	5.09028	5.25481	6.08962	5.24611	2.9092	3.9011	2.90463	1.6122	lightgreen	-0.10556	-0.242711	-0.162621
Ec-00_009840	hypothetical protein	Unknown	OG0019863		5.19374	6.03601	0	1.12909	0	0	0.993432	3.35014	0	1.21055	0	0	0.811408	1.76139	1.22146	0	0	0	0	0.964221	0.95637	0	0	0	2.3043	0	0	0.812953	1.24404	0	0.475874	0	0	0	0	0	0	0	0	0	0	blue	-0.395011	0.0258829	0.121074
Ec-00_009850	PC-Esterase	Metabolism	OG0000119		9.1563	9.33801	7.5935	7.91179	7.61686	7.59195	6.30893	7.03429	7.02387	6.65655	6.61375	4.53612	4.89176	4.14826	4.16838	2.71999	3.64069	5.14979	4.95208	2.52483	0.95637	3.45247	4.01809	2.10452	0.728178	0	0.522295	1.32976	1.90196	2.1154	1.74182	2.8877	3.57217	3.77798	3.37703	2.34107	1.90196	3.42868	3.9011	4.15943	4.12577	blue	-0.757601	-0.552775	-0.427082
Ec-00_009860	DNA binding HTH domain, Psq-type	DNA or chromatin modification	OG0009248		4.23263	3.55699	2.74265	2.18955	3.25783	0	1.5762	2.30503	0	1.85938	0	0.820122	0.462012	0	0.736313	0	0	0	0	0	0	2.39589	3.1045	3.82804	3.94898	0	0	4.31615	4.23204	0	0	0	0	0	0	0	0	0	0	0	0	NA	NA	NA	NA
Ec-00_009870	expressed unknown protein	Unknown	OG0019864		5.19374	4.49436	5.62616	6.33169	6.25504	7.68733	6.81984	6.47627	7.56685	7.90015	7.47743	5.77053	5.1436	6.68627	5.98329	4.0573	3.11244	4.63722	4.20738	4.45432	4.30804	4.17409	3.63244	4.90904	4.93284	3.71452	3.67564	5.4136	4.75507	2.58488	3.98631	5.47917	5.38377	5.4838	4.86631	5.2327	5.08093	0	2.07619	3.80494	1.02048	turquoise	-0.485326	-0.386338	-0.380904
Ec-00_009875	lncRNA	Unknown	NA		0	0	2.39774	3.392	2.14606	3.49261	2.79608	1.21034	0	0	0	0	0	0	0	0	0	0	0	0	0	0	0	0.731276	1.20982	0.633432	0	0	1.24404	0	0	0	0	0	0	0	0	0	0	0	0	NA	NA	NA	NA
Ec-00_009880	hypothetical protein	Unknown	OG0005182		5.19374	4.49436	7.31271	7.53152	7.44312	7.6137	8.52603	7.94664	9.34823	9.25769	8.33812	7.12875	7.09285	7.0667	7.5427	8.26855	7.95593	7.95312	8.17648	8.45912	8.24705	7.68387	7.47348	8.02836	8.01327	8.82696	8.66007	8.49075	8.18898	8.10406	8.18847	7.92975	7.80036	7.77636	7.47792	8.67846	9.2266	8.7344	8.90463	9.19854	9.82689	blue	0.393266	0.17433	-0.119623
Ec-00_009890	Mpv17/PMP22	Membrane function and transporters	OG0000494		9.32594	9.3138	8.6625	8.26351	8.54203	7.65623	7.56433	6.74723	10.3751	9.65107	9.00264	9.00218	9.21063	9.0325	9.8522	8.73004	10.3128	8.01363	8.22544	8.6212	8.4391	10.2086	10.1466	9.01643	8.65159	10.4575	10.8257	8.31677	8.15474	10.0714	10.1158	9.8175	9.48458	10.3235	9.22439	8.26698	11.8814	9.59067	8.13377	9.85724	6.8983	grey	0.329275	0.134178	0.0271896
Ec-00_009900	Peptidase S8/S53 domain	Proteolysis	OG0019865		5.7655	5.05783	5.58398	5.32833	4.91277	4.6113	5.65952	4.46093	4.41885	6.05989	5.38869	2.66877	3.33043	1.76139	0.41463	5.64905	1.1857	2.3164	3.28344	1.53706	1.52649	3.62854	3.1045	3.26023	1.85845	0.633432	0.904947	2.81853	1.61018	1.16987	1.35786	3.35068	3.57217	1.82521	2.13098	0	1.90196	1.39397	1.05124	2.63008	2.84228	blue	-0.720171	-0.533293	-0.513443
Ec-00_009910	hypothetical protein	Unknown	OG0000039		0	0	0	0	1.43994	0	0	0	0	0	0	0	0	0	0	0	0	0	0	0.964221	0.95637	0	0	1.86411	2.09853	1.40803	2.16669	0.812953	2.53359	2.8579	2.29502	1.37863	0.489014	1.01252	0.808298	2.34107	1.24404	0	2.40305	0	1.6122	NA	NA	NA	NA
Ec-00_009920	hypothetical protein	Unknown	OG0019866		7.33267	7.1396	9.0472	8.94399	8.59412	8.77832	8.31331	8.42599	6.82201	8.07204	8.35823	8.07935	8.1015	7.94485	8.06087	7.72202	8.76714	8.12754	7.94765	8.51269	8.29967	6.99401	7.00356	6.36095	6.07277	8.32023	9.03716	6.04625	6.14565	8.79405	8.94649	8.55248	8.355	8.22452	8.35975	7.01238	8.31522	8.23147	8.28526	8.77153	8.44994	grey	-0.142754	-0.124901	-0.135445
Ec-00_009930	Regulator of chromosome condensation, RCC1	DNA or chromatin modification	OG0004976		7.74547	7.1396	1.27694	4.48348	4.31063	3.05756	2.31141	2.92022	3.24728	4.6239	3.53633	6.18908	5.72007	5.51153	6.54271	3.31352	1.8276	1.21845	1.80579	6.81081	6.35537	1.27561	2.26318	5.90086	5.65079	5.24541	4.5922	5.79415	6.20038	5.84957	5.94411	5.67262	6.40812	6.96724	7.17461	6.13207	3.73524	6.21451	6.34736	7.41779	7.44131	turquoise	0.387909	0.734813	0.8865
Ec-00_009940	Six-bladed beta-propeller, TolB-like	Unknown	OG0019867		5.9841	4.49436	4.88093	4.82303	4.54041	5.34193	5.89395	5.81211	7.06106	6.05989	6.96807	6.29133	6.62589	6.67507	6.38497	5.28552	6.2519	6.44713	6.4241	7.42779	7.30424	6.11287	5.9934	6.12207	5.10785	5.15902	6.32119	6.02964	5.69037	7.38576	7.30456	7.7213	7.81077	6.75262	7.9218	5.57797	6.08877	7.05385	7.55137	7.12773	7.69868	brown	0.712354	0.331443	0.405225
Ec-00_009950	WD40/YVTN repeat-like-containing domain	Protein binding or modification	OG0019868		4.79178	3.55699	8.52434	8.30742	8.34329	8.58821	8.64508	8.59729	8.35419	9.12476	9.30167	7.06831	6.58109	6.38994	7.2776	8.63994	8.69797	9.1788	8.83071	8.45912	8.00974	6.85924	6.33646	7.29265	6.70152	8.2171	8.15256	6.59032	6.85752	7.77139	7.77508	6.62955	6.78059	7.02474	6.65143	8.85355	8.52808	8.21576	8.21411	8.48323	8.4835	yellow	-0.0499316	-0.23276	-0.513611
Ec-00_009970	hypothetical protein	Unknown	OG0004984		5.50776	5.462	8.95918	8.86905	8.99859	8.24927	8.18655	9.12099	8.16217	8.71058	8.8874	7.45885	7.03174	7.04075	7.353	8.39848	9.44766	8.5718	8.32986	8.52391	8.11626	7.04147	6.58514	6.20186	6.07277	7.95075	8.44215	6.14213	6.56605	8.58455	8.67442	7.08128	7.18035	6.91954	6.85237	8.27647	9.44629	8.80961	8.76936	9.1367	9.82853	yellow	-0.106848	-0.21001	-0.420804
Ec-00_009980	hypothetical protein	Unknown	OG0000154		0	0	0	1.12909	2.14606	1.97463	1.99014	1.85911	2.13694	3.15146	2.0105	0	0	0	0.41463	0	0	0	0	3.25687	2.25147	0	0	6.38394	5.47028	3.12392	3.81631	5.19258	5.29723	3.66287	3.07458	6.0919	5.03893	3.34438	4.16195	5.57797	5.02138	2.5568	4.62004	2.63008	2.84228	salmon	0.365824	0.804753	0.437264
Ec-00_009990	Hypothetical protein	Unknown	OG0019869		7.25074	7.68385	0	0	0	0	0	0	0	0	0	0.820122	1.09247	0.845388	4.82286	0	1.1857	0	3.28344	8.84953	8.55546	0	0	7.06266	6.24501	5.47732	6.6815	6.42227	6.34098	8.0953	8.2982	9.78908	9.27975	9.09902	8.43526	6.53142	5.999	8.4487	8.18782	8.68775	8.06288	salmon	0.55152	0.932809	0.795289
Ec-00_010000	Hypothetical protein	Unknown	NA		0	0	0	0	0	0	0	0	0	0	0	0	0	0	0	0	0	0	0	0	0	0	0	0	1.57029	0	0	0.812953	0	0	0	0	0	0	0	0	0	0	0	0	0	NA	NA	NA	NA
Ec-00_010010	Uridyltransferase	Metabolism	OG0003110		7.07143	7.8944	9.30589	8.8469	9.21366	8.63681	8.74175	9.11417	8.97713	9.44345	9.31546	8.71078	8.11335	8.03526	8.80787	9.55696	9.63279	9.41587	9.00554	9.23143	8.96954	8.83201	8.63717	8.41623	8.14626	9.28009	9.29533	8.37054	8.4427	9.00763	9.15469	8.86748	8.74787	8.69198	8.66219	9.55328	9.59667	9.21333	9.3173	9.15979	9.57783	yellow	0.128919	-0.0807999	-0.381711
Ec-00_010020	expressed unknown protein	Unknown	OG0019870		6.97266	7.24578	5.62616	5.91553	5.33632	6.67375	5.54171	5.63271	5.26233	4.90273	2.47088	3.34861	2.96242	1.3749	2.32062	5.10987	4.02652	5.4851	5.35542	4.88412	4.08637	5.29892	4.17809	3.53128	3.94898	4.94334	4.5922	3.53546	2.97141	3.88255	3.20257	2.32209	3.18106	1.01252	1.70196	4.66679	5.57084	5.32452	4.90459	5.4957	5.03942	red	-0.599046	-0.195662	-0.431638
Ec-00_010030	Catalase decomposes hydrogen peroxide to molecular oxygen and water.	Redox	OG0000050		12.3732	12.1469	9.53351	9.05764	9.6395	9.02548	9.39837	8.28117	5.83471	5.55456	5.43992	2.57921	4.13819	2.71748	1.22146	2.45179	0	0	3.6127	4.63083	3.61883	0	0	3.26023	3.03949	1.07211	0	3.22108	3.09209	0.874424	0.83311	1.37863	2.64277	2.01874	2.46123	1.60093	1.24404	1.39397	1.65288	0	0	brown	-0.861826	-0.261285	-0.269508
Ec-00_010040	Notch domain	Cellular regulation and signalling	OG0019871		4.23263	0	0	0	0	0	0	0	3.24728	1.85938	2.0105	0.467569	1.70698	0	0	0	0	0	0	0.964221	0.95637	0	1.53617	3.35635	2.6444	0	0.904947	0.812953	0	0.874424	0	0.485483	3.18106	0	0	0	0	0	0	0	0	NA	NA	NA	NA
Ec-00_010050	hypothetical protein	Unknown	OG0019872		0	0	0	0	1.43994	0	0	0	1.4325	1.85938	0	1.10322	1.70698	0	1.41402	0	0	0	1.16871	0.964221	1.93405	0	0	2.65096	1.20982	2.57562	2.01923	4.42181	4.641	3.15642	1.90123	5.04459	4.76694	5.13274	2.00165	1.60093	0	4.92144	3.9011	2.90463	3.35858	NA	NA	NA	NA
Ec-00_010060	hypothetical protein	Unknown	OG0019873		0	0	1.27694	0	0	0	0.993432	1.85911	2.13694	3.68126	6.67918	1.54294	1.09247	1.76139	2.93718	3.14146	2.27029	0	1.16871	1.94599	1.93405	1.94186	0	3.35635	2.3043	0	1.20709	5.30732	5.05147	2.1154	1.11921	5.07914	4.56042	4.48324	2.55641	2.34107	1.24404	3.80983	3.9011	1.84612	0	grey	0.424727	0.284015	0.214344
Ec-00_010070	hypothetical protein	Unknown	OG0019874		0	4.49436	0	2.79411	2.14606	1.30166	1.99014	0	1.4325	1.85938	0	0.820122	0.811408	0	3.73546	0	0	2.65715	0	5.21484	4.77251	4.38502	4.97287	8.6711	8.91559	7.11126	7.3042	8.75109	8.58318	7.82804	7.92411	7.92025	7.51866	7.55618	7.02038	7.49136	5.999	6.57628	6.59149	6.04183	6.12754	salmon	0.53845	0.860299	0.616511
Ec-00_010080	conserved unknown protein	Unknown	OG0019875		3.3074	8.60253	1.27694	1.12909	2.14606	0	0	1.21034	3.86722	4.06791	3.09981	0	2.00709	2.71748	0.999185	0	0	1.21845	1.16871	0.964221	0.95637	1.27561	0	4.37873	4.22703	0	0	3.79345	4.23204	0.502471	0	3.29296	1.93523	2.47986	2.35932	6.00079	0	2.0895	0	1.84612	0	cyan	-0.0985134	0.255613	0.204764
Ec-00_010090	Hypothetical protein	Unknown	OG0019876		4.23263	3.55699	2.39774	2.52327	1.43994	3.82641	3.31008	3.15114	4.81692	4.27796	5.16334	5.70852	5.63496	5.92496	5.59335	5.80139	4.72763	5.60794	5.21704	5.60141	5.72036	6.22674	6.37	6.13568	6.25744	5.1811	3.72407	6.74083	5.91968	4.62926	4.88389	5.38562	5.20595	5.32808	5.92401	7.03493	4.8264	4.66789	4.55572	3.50859	5.68372	brown	0.761101	0.243967	0.361279
Ec-00_010100	expressed unknown protein	Unknown	OG0019877		6.62786	7.1396	8.74138	7.55903	6.18883	9.10055	8.3088	7.60101	5.83471	5.77833	4.47278	6.95715	7.02339	6.4171	6.08586	6.49855	5.86699	6.01556	6.22184	6.9054	6.81903	4.87873	5.05763	7.46963	7.04777	4.38163	4.74082	6.84897	6.60713	3.28531	3.75535	6.81526	6.9782	6.04692	5.63878	7.4416	5.8699	4.92144	5.00436	4.75238	3.62229	grey	-0.532664	-0.180408	-0.103073
Ec-00_010110	Protein kinase-like domain	Cellular regulation and signalling	OG0000141		7.74547	7.68385	9.24628	8.9265	7.61686	8.47396	7.86953	7.57141	4.72722	5.67078	5.38869	6.81725	6.6532	4.44065	4.36768	5.36592	4.41925	5.52722	5.73932	4.51559	5.08384	2.39589	0	6.58579	6.65528	3.98948	4.27217	7.59416	6.83175	3.66287	3.62434	4.18605	5.34133	4.45004	2.88455	5.15249	4.33345	5.97416	2.40305	4.26057	3.73802	brown	-0.70699	-0.134908	-0.139687
Ec-00_010120	hypothetical protein	Unknown	OG0019878		0	0	0	0	0	0	0	0	0	0	0	0	0	0	0	0	0	0	0	0	0	0	0	0	0	0	0	0	0	0	0	0	0	0	0	0	0	0	0	0	0	NA	NA	NA	NA
Ec-00_010130	hypothetical protein	Unknown	OG0019879		6.34159	5.05783	7.01226	6.10163	6.28705	5.53665	5.68753	5.18887	4.98115	5.02424	2.81935	3.04837	3.48433	0.845388	2.41371	1.08252	3.11244	0	1.16871	3.63368	3.61883	2.74071	2.74432	2.9262	2.48435	3.02968	2.30046	4.01222	3.73525	3.01486	2.29502	2.8877	4.43147	3.02184	2.46123	1.60093	2.35214	4.47015	3.79365	4.05066	4.03816	brown	-0.712698	-0.0828138	-0.111409
Ec-00_010140	expressed unknown protein	Unknown	OG0019880		0	0	7.98251	8.5733	8.79109	8.24927	7.9117	8.0857	0	2.92054	1.33033	0	0	0	0	7.4634	6.43308	7.40535	7.22424	6.09849	6.25236	0	0	0	0	0	0	0	1.24404	0	0	0	0	0.59332	0	6.25239	7.33205	6.47431	6.42143	6.7814	5.71231	black	-0.428238	-0.251174	-0.419797
Ec-00_010150	expressed unknown protein	Unknown	OG0019881		8.51527	8.18873	7.99866	8.30742	8.81872	6.97196	7.90575	8.16049	8.56304	8.51713	7.86254	5.33721	5.47275	5.35182	5.1277	7.52598	6.73881	7.55537	7.29474	6.4041	6.6537	4.87873	4.88282	5.41233	5.7243	6.85375	6.83822	5.77434	6.18689	6.52085	6.2705	5.6149	5.62697	4.931	4.80948	6.13207	7.63986	6.94369	7.04244	6.67549	7.90468	red	-0.66603	-0.259576	-0.554285
Ec-00_010160	Phytochrome-like protein	Cellular regulation and signalling	OG0019882		5.50776	4.49436	4.05795	3.02206	4.54041	3.66915	2.98849	3.15114	0	1.21055	0	6.45134	6.55237	6.24592	5.92913	2.45179	1.8276	0	2.58314	6.70957	6.4822	2.39589	3.63244	4.66812	5.31238	3.83087	3.81631	3.33366	4.86078	4.14286	3.83652	5.46617	6.29405	5.88248	5.89698	5.15249	4.00492	4.47015	4.48839	5.6528	5.43203	turquoise	0.290074	0.522247	0.858479
Ec-00_010170	Trehalase C-terminal fragment, family GH37	Metabolism	OG0006068		6.34159	7.24578	8.43817	7.68089	8.81323	8.29035	8.96128	8.67355	9.21432	8.9011	9.90195	8.11166	8.35703	7.40863	7.25577	7.30926	7.89543	7.8239	8.11935	7.64898	7.71914	6.50022	5.81011	8.36516	8.3803	6.88773	6.02518	8.30646	8.33064	6.76145	6.66428	8.81462	8.94854	6.89508	6.01059	6.7379	10.274	7.47939	7.28987	7.55353	7.8349	grey	-0.237011	-0.167796	-0.27839
Ec-00_010180	hypothetical protein	Unknown	OG0000154		0	3.55699	0	1.12909	2.14606	3.82641	4.79466	3.68092	2.13694	1.21055	0	1.33977	1.52973	2.88244	3.58347	7.54337	5.34045	6.74358	6.52531	2.93679	4.37496	0	1.53617	2.10452	3.25325	3.29572	2.64036	3.62668	3.80753	1.41498	1.11921	4.52375	4.43147	5.15351	3.7435	1.60093	2.69475	4.57241	4.18244	1.20016	1.02048	grey	0.225544	0.0480147	-0.0202961
Ec-00_010190	hypothetical protein	Unknown	OG0019883		6.17389	5.05783	5.92544	5.88687	5.96973	5.78685	5.81996	5.81211	5.7911	5.59435	5.87172	5.01738	4.33989	4.5913	4.93702	1.69398	4.50275	1.86945	2.2462	1.53706	2.92276	4.47995	3.83811	5.29595	4.9015	3.12392	2.01923	5.10011	5.5287	1.62442	2.93413	5.20965	4.4582	4.63863	4.57954	4.41507	3.4033	2.0895	2.40305	2.90463	3.20613	brown	-0.58674	-0.261097	-0.175104
Ec-00_010200	Fatty acid desaturase, type 1	Metabolism	OG0019884		8.28768	8.52029	8.28202	8.54606	8.24895	8.53791	8.25366	8.53221	8.00883	7.96987	8.90117	9.03729	8.34368	8.09953	8.9603	8.13726	8.70239	10.2965	10.2383	8.82553	8.82146	8.22598	8.15044	7.03388	6.70152	8.44185	9.26189	6.26079	7.09267	7.99048	8.33533	7.44811	7.28856	8.72704	6.44304	6.7379	9.59157	7.39818	6.55904	7.98154	7.07379	grey	-0.217098	-0.479112	-0.482314
Ec-00_010210	conserved unknown protein	Unknown	OG0019885		10.3643	10.5694	6.08519	7.19994	6.74431	7.11606	6.27241	6.36568	5.12858	5.24028	5.38869	1.72101	1.52973	1.3749	1.87328	0	0	2.65715	1.80579	1.94599	1.93405	1.27561	2.74432	1.21426	2.09853	0	0	0.812953	0	0	0	1.37863	1.93523	2.92852	2.00165	1.60093	1.90196	0	2.40305	0	0	brown	-0.830854	-0.331631	-0.369561
Ec-00_010220	expressed unknown protein	Unknown	OG0000693		4.23263	0	8.03042	8.54147	8.59412	8.53791	8.05835	8.02877	6.33735	7.13249	7.28068	6.58964	6.36688	6.18403	6.51146	7.61092	8.06982	7.99874	7.6033	7.8762	7.57004	4.47995	4.17809	5.49912	4.46005	6.99137	7.393	4.96681	5.6118	7.74921	7.66828	7.21549	7.32532	6.5245	6.86172	6.76513	6.94023	7.75419	7.87506	8.15576	9.20551	yellow	-0.00743357	-0.0897695	-0.195402
Ec-00_010230	hypothetical protein	Unknown	OG0019886		0	0	3.02081	3.54657	3.87821	4.32529	3.15823	0	0	0	0	0	0.462012	0	1.41402	0	0	0	0	0	0	0	0	0	1.20982	1.40803	0	1.32976	0	0	0.83311	1.37863	1.14434	0.59332	0.460032	0	0	2.0895	2.40305	0	2.61893	NA	NA	NA	NA
Ec-00_010240	Peptidase C19, ubiquitin carboxyl-terminal hydrolase	Proteolysis	OG0008380		5.19374	6.44554	4.73436	4.62902	5.20847	3.96821	4.74221	4.76969	6.82201	6.57934	6.37136	7.1248	6.63688	6.30526	6.34416	8.04868	7.93354	6.98938	7.44697	6.92811	7.15039	7.85301	7.86313	6.40656	6.21981	6.19404	6.63159	6.30288	6.01436	6.79432	6.71882	6.08341	6.25648	6.63939	6.57961	6.1733	6.73311	7.46617	7.26996	7.23103	7.54029	brown	0.725297	0.0225037	0.135915
Ec-00_010250	hypothetical protein	Unknown	OG0019887		0	0	1.27694	3.81345	3.25783	4.69528	3.98766	3.68092	0	0	3.33452	0	0	0	1.41402	0	1.1857	1.21845	0	1.94599	0.95637	2.74071	2.26318	0	0.728178	0	0	0	0	1.16987	0	0	0	0.59332	0.460032	0	0	0	1.05124	1.20016	1.02048	NA	NA	NA	NA
Ec-00_010260	hypothetical protein	Unknown	OG0019888		0	0	0	0	0	0	0	1.21034	0	0	0	0	0	0	1.99878	0	0	0	0	6.23225	5.58559	0	0	3.75937	3.03949	4.91725	6.27317	3.79345	3.4033	7.53906	7.87692	6.99342	6.50102	6.00182	5.33754	4.77789	3.73524	3.96828	4.34351	5.00647	3.84516	salmon	0.589293	0.86287	0.630016
Ec-00_010270	Hypothetical protein	Unknown	NA		0	0	0	0	0	0	0	0	0	0	0	0	0	0	0	0	0	0	0	0	0	0	0	0	0	0	0	0	0	0	0	0	0	0	0	0	0	0	0	0	0	NA	NA	NA	NA
Ec-00_010280	Hypothetical protein	Unknown	OG0019889		0	0	1.94355	1.75464	2.61807	1.30166	0	0	2.13694	2.30532	3.53633	0.467569	1.3276	0.845388	0.41463	0	0	1.21845	0	0	0.95637	0	0	1.21426	1.20982	0	0	2.25822	0	0	0	1.92615	1.93523	1.33694	1.85957	0	0	0	0	0	0	NA	NA	NA	NA
Ec-00_010290	Hypothetical protein	Unknown	OG0019890		0	0	2.39774	2.79411	1.43994	2.77832	1.5762	1.85911	0	0	1.33033	0	0	0	0	0	0	0	0	0	0	0	0	0	0	0	0	0	0.752151	0	0	0	0	0	0	0	1.24404	0	0	0	0	NA	NA	NA	NA
Ec-00_010300	Hypothetical protein	Unknown	NA		0	0	4.57119	5.04678	3.69951	5.53665	3.89461	4.1764	6.53534	7.09137	6.84041	5.84928	5.42285	5.94375	5.42467	1.08252	1.8276	0	1.80579	0	0	1.94186	1.53617	6.20186	6.26977	0	0	5.83298	5.78293	0	0	5.88284	5.36976	5.71095	6.04383	0	0	0	1.05124	0	0	grey	-0.146357	-0.229198	-0.0383151
Ec-00_010310	Acyl carrier protein-like	Metabolism	OG0019891		0	0	4.38719	5.37034	4.8283	7.41747	6.99816	6.84939	2.6082	2.64548	4.37085	5.71905	5.65671	3.93936	5.55299	3.95704	5.70015	4.38574	2.58314	5.05894	4.82131	2.39589	3.1045	4.33221	4.27674	5.66142	6.85463	2.81853	3.30684	5.54937	5.63938	6.3329	5.54207	5.7387	4.3858	4.41507	6.71443	4.75745	4.74067	5.22243	6.12754	magenta	0.117489	0.108675	0.066207
Ec-00_010320	Hypothetical protein	Unknown	OG0019892		0	0	0	0	0	0	0	0	0	0	0	0	0	0	0	0	0	0	0	1.94599	0	0	0	0	0	0	0	0	0	0	0	0	0	0	0	0	1.24404	0	0	0	1.02048	NA	NA	NA	NA
Ec-00_010330	Hypothetical protein	Unknown	OG0019893		5.50776	3.55699	8.62138	8.03445	8.13048	7.97463	9.12641	9.43215	6.03491	6.53913	8.96378	8.42613	7.58776	7.0667	8.54527	7.75971	10.0572	8.81647	8.11286	9.06466	8.8423	7.50357	7.32751	6.02304	5.33602	8.0886	9.50821	5.06792	6.02955	8.49742	8.78462	8.29941	8.07748	8.33319	7.43473	7.5236	9.49909	8.15113	8.25519	8.76294	8.41123	blue	0.102181	-0.160104	-0.219348
Ec-00_010340	Hypothetical protein	Unknown	NA		0	0	0	0	0	0	0	0	0	0	0	0	0	0	0	0	0	0	0	0	0	0	0	0	0	0	0	0	0	0	0	0	0	0	0	0	0	1.39397	0	0	0	NA	NA	NA	NA
Ec-00_010350	Hypothetical protein	Unknown	OG0019894		0	0	0	2.18955	3.25783	4.2158	3.44747	2.30503	2.6082	2.92054	2.0105	1.72101	2.00709	3.1647	1.58388	2.12208	1.1857	2.3164	1.80579	0	1.93405	2.74071	0	3.04635	3.15032	2.43563	3.07314	2.4701	3.94208	2.8579	2.50821	0.848085	1.93523	1.82521	1.85957	3.19117	2.69475	1.39397	1.65288	1.20016	1.6122	NA	NA	NA	NA
Ec-00_010370	Hypothetical protein	Unknown	OG0019895		8.77178	8.78971	9.95152	9.80569	9.71789	8.94627	8.71819	9.31799	9.00125	9.70204	8.92834	7.99528	8.04489	7.78205	7.86256	8.73004	9.44503	8.94244	8.86587	9.46485	8.9937	7.13194	6.64115	7.21785	6.48597	8.92347	9.43372	7.07633	7.31355	9.42809	9.59896	8.67474	8.60718	8.22206	8.25368	8.17862	9.44062	8.82004	8.87198	9.28811	9.78209	midnightblue	-0.354211	-0.0670868	-0.30505
Ec-00_010380	expressed unknown protein	Unknown	OG0019896		6.17389	6.03601	5.85624	5.37034	5.14003	6.61027	6.90581	6.11529	6.14292	6.78245	7.00256	8.07321	8.1015	6.95995	7.08938	7.57754	5.86699	6.91201	6.31525	7.82871	7.59832	6.97783	6.64115	7.89068	7.85044	7.35905	7.09915	7.4455	7.62993	5.81795	6.23352	7.22709	7.38226	7.05816	7.00781	7.28112	5.65162	6.82441	7.38549	6.83157	7.61789	turquoise	0.612243	0.284824	0.533883
Ec-00_010390	PR1-like metalloprotease	Defence	OG0000130		0	0	2.39774	3.02206	3.25783	3.66915	6.74184	3.35014	2.13694	4.96477	5.10103	5.64373	5.03152	5.10699	4.95262	2.12208	3.64069	2.93259	2.58314	1.53706	1.93405	5.13357	3.39248	5.69567	5.7243	2.92885	3.21545	5.1316	5.9678	1.16987	1.56257	5.27072	5.52952	5.02416	4.5099	2.34107	1.24404	2.9092	1.05124	1.84612	3.62229	red	0.162803	-0.144854	0.0819335
Ec-00_010400	expressed unknown protein	Unknown	OG0000429		8.20307	7.68385	9.56908	9.39692	9.2946	9.28466	9.45242	9.21649	11.2381	11.266	10.8007	8.78527	8.53347	8.1162	8.69418	9.89849	9.97551	9.96608	9.86818	9.75416	9.57683	9.40083	9.02698	8.32117	7.33268	9.32914	9.59459	7.83315	7.80347	9.18022	9.377	9.17562	8.88347	8.71137	7.99584	9.12975	10.3875	9.46337	9.64555	9.30004	9.02073	turquoise	-0.10022	-0.397645	-0.682801
Ec-00_010410	hypothetical protein	Unknown	OG0019897		4.79178	0	5.82035	6.54847	6.25504	5.58148	6.13677	6.14237	6.30671	6.22107	5.94449	5.49247	4.44363	4.7277	5.05731	6.01594	5.95855	5.64667	5.67028	5.13899	5.43693	5.854	5.70892	6.08046	5.84456	6.54859	6.55334	5.90763	5.39431	6.30976	6.41624	4.66695	4.34818	5.29107	5.0245	5.90613	5.999	4.24093	4.95534	4.52733	4.94622	yellow	-0.0584965	-0.186257	-0.440953
Ec-00_010420	Protein kinase-like domain	Cellular regulation and signalling	OG0009235		5.9841	6.03601	7.36347	7.73816	7.69049	7.16106	6.80713	7.03429	6.63736	7.59157	7.80508	7.39467	7.02757	7.11725	6.97566	8.07284	9.0254	8.20094	7.99782	7.52037	7.44325	6.85924	6.86931	6.17575	6.14147	7.64387	7.42265	6.1575	6.29142	8.08427	8.12122	6.78418	6.76461	7.42992	7.56919	7.14265	8.36996	8.72887	8.37186	8.66947	9.05461	yellow	0.229816	-0.0828051	-0.146945
Ec-00_010430	conserved unknown protein	Unknown	OG0019898		7.80409	7.34468	8.35908	8.47082	8.66889	8.61001	8.04758	8.40936	8.85009	9.54846	9.16751	6.21904	5.4101	5.88661	6.37343	5.93917	6.38987	6.7074	6.69132	6.60069	6.75766	5.81811	4.78677	5.85223	5.21374	4.41929	3.34497	6.38356	6.52375	3.92274	4.08926	6.2213	5.89495	5.06857	5.36409	7.99533	5.8699	5.32452	5.18531	4.44377	5.71231	blue	-0.709201	-0.465004	-0.551545
Ec-00_010440	hypothetical protein	Unknown	OG0019899		4.23263	4.49436	5.49572	4.99401	4.99257	5.05454	4.84527	4.90238	3.86722	4.90273	4.89615	4.06125	3.79012	4.49263	4.32038	3.95704	3.78108	4.38574	4.39023	4.97418	4.37496	1.94186	2.26318	2.65096	2.78846	3.12392	2.30046	2.4701	2.53359	3.01486	2.77851	4.44645	4.43147	3.10948	4.5099	5.4496	4.12294	3.6318	3.25979	3.80494	4.12577	NA	NA	NA	NA
Ec-00_010450	expressed unknown protein	Unknown	OG0019900		3.3074	3.55699	0	1.75464	1.43994	1.97463	0	1.21034	0	1.21055	0	0	0.811408	1.76139	0.41463	2.12208	1.1857	0	1.16871	0.964221	0	1.94186	0	1.21426	0.728178	0	0.522295	2.65481	0.752151	0.502471	0	0	0.489014	0	0.460032	1.60093	1.90196	0	0	0	1.02048	NA	NA	NA	NA
Ec-00_010460	expressed unknown protein	Unknown	OG0019901		6.49182	6.03601	4.17624	4.03859	3.25783	3.49261	3.5729	2.64517	1.4325	2.30532	2.81935	0	0.811408	1.3749	0.41463	0	0	0	0	0.964221	0.95637	1.94186	3.1045	2.79514	2.3043	0	0	2.25822	3.09209	0	0.475874	0.848085	1.14434	0	0	0	0	0	0	0	1.02048	blue	-0.755738	-0.222038	-0.217319
Ec-00_010470	peptidase-like	Proteolysis	OG0019902		5.7655	6.44554	5.07617	4.23329	4.18038	8.38191	8.21088	6.59867	8.10989	7.86804	8.11984	8.12359	8.2322	8.79956	8.54141	9.23444	8.4471	8.44569	8.27859	8.3582	8.43519	8.15583	8.34003	9.0035	8.83907	9.4782	8.87102	8.69424	8.17196	8.70178	8.68678	8.79006	8.26892	8.74768	8.34982	9.57652	8.57025	7.42576	7.75844	7.47152	6.5794	brown	0.751363	0.262043	0.190831
Ec-00_010480	Hypothetical protein	Unknown	OG0019903		5.50776	5.77737	5.07617	5.32833	5.66333	4.09731	4.84527	5.47117	3.24728	4.27796	3.53633	4.75643	4.94577	5.07325	4.83973	4.23908	4.72763	4.63722	4.8927	4.68517	4.95854	5.35008	5.85816	4.37873	4.0667	3.02968	3.07314	4.65637	4.23204	3.45934	3.52989	4.68949	4.58488	4.931	5.26893	3.19117	4.75507	4.24093	3.25979	4.52733	3.84516	grey	-0.393629	-0.368712	-0.0549106
Ec-00_010490	hypothetical protein	Unknown	OG0019904		8.06605	7.68385	9.00785	8.86905	8.93941	8.35634	7.96988	8.25038	8.66922	8.87306	7.93576	7.23521	7.06058	7.30341	7.40494	8.34988	8.32624	8.21389	8.04631	8.40752	8.22908	5.854	6.0358	7.00451	6.72856	8.02896	7.79554	6.82027	7.15634	7.7878	7.8841	7.78549	7.78461	7.48012	7.60859	8.2859	9.01009	8.15937	8.17717	8.62275	9.40255	midnightblue	-0.351519	0.00405946	-0.257452
Ec-00_010500	hypothetical protein	Unknown	OG0019905		0	0	0	0	0	0	0.993432	0	0	0	0	0	0	0	0.41463	0	0	0	0	0	0	0	0	0	0	0	0	0	0	0	0	0	0.489014	0.59332	0	0	0	0	0	0	0	NA	NA	NA	NA
Ec-00_010510	Fungal lipase-like domain	Metabolism	OG0019906		0	0	4.05795	4.23329	4.54041	4.92137	5.715	5.18887	5.12858	5.24028	7.00256	4.38574	6.0261	5.82712	5.22081	6.6981	6.68621	7.00437	6.91669	2.74547	3.09142	5.9232	5.65553	2.49076	2.3043	2.10685	0.904947	1.32976	1.90196	0	0.83311	1.13761	0.489014	0	0	1.60093	1.24404	0	1.05124	1.20016	0	lightyellow	-0.288288	-0.898414	-0.711868
Ec-00_010520	BSD	Unknown	OG0004618		12.0245	12.1227	10.1398	9.98878	9.84157	10.105	9.76657	9.77491	9.21019	9.03363	8.91482	9.78614	10.2259	9.93811	9.62103	9.19371	9.67839	9.64833	9.6093	9.41949	9.59097	10.1841	10.2915	9.64575	10.3454	9.6622	9.61319	10.2707	10.0192	10.0225	10.0039	9.91399	10.0789	9.70262	10.0027	8.95753	9.77177	9.4567	9.26545	9.14002	9.00637	yellow	-0.348486	0.0562435	0.175152
Ec-00_010530	Hypothetical protein	Unknown	OG0019907		0	0	6.69313	7.39572	7.12681	7.93199	6.91768	6.31896	1.4325	1.85938	2.0105	0	0	0.845388	0.736313	8.06684	7.61496	7.74578	7.63987	6.25039	6.54166	0	0	0	1.20982	0	0	1.32976	0.752151	0	0	0	0	0	0	9.91412	6.92406	8.58339	8.92068	7.05919	7.80204	black	-0.25156	-0.15563	-0.324012
Ec-00_010540	conserved unknown protein	Unknown	OG0019908		5.9841	6.25526	3.45454	4.48348	4.8283	5.44257	4.37978	3.94983	2.13694	2.30532	2.0105	8.21749	8.04695	6.65239	6.91725	2.12208	1.1857	1.86945	3.75286	7.61439	7.29563	3.78545	2.74432	8.01369	7.74842	6.92747	6.07271	7.18537	7.49962	5.4566	5.98028	7.2116	7.65487	6.71119	7.66575	6.9185	2.69475	6.50048	7.06572	7.49247	7.90468	turquoise	0.387157	0.687226	0.934167
Ec-00_010550	Hypothetical protein	Unknown	OG0019909		7.62055	6.61362	7.24664	7.30115	6.40839	7.48982	7.96988	7.5207	8.75683	7.92376	8.65238	7.54417	7.59904	8.15301	8.42044	8.85718	8.83717	8.51012	7.8651	5.92869	7.09192	8.7439	8.80593	7.381	7.04059	5.66142	3.62553	8.48162	8.10541	4.93458	4.70092	6.05765	6.8579	6.31923	3.26876	6.1733	2.97141	5.13701	4.26522	5.06356	4.20836	grey60	-0.28721	-0.674618	-0.455191
Ec-00_010560	Adenosine/AMP deaminase	Metabolism	OG0019910		6.62786	5.462	6.20136	6.65429	6.15455	7.50153	7.47876	7.60101	7.7826	7.60137	10.0182	8.13934	8.08154	8.12033	8.08407	7.78917	7.55755	8.17468	8.18888	8.03633	8.12114	8.22598	8.35685	8.04288	8.29842	8.07392	8.30162	8.02141	7.81229	8.54164	8.51096	8.37263	8.2384	8.26802	8.52183	8.17862	8.49014	8.03951	8.38117	7.80025	8.20544	brown	0.751494	0.188682	0.140006
Ec-00_010570	Ribosomal protein S6e	Protein synthesis	OG0006933		13.1341	13.133	14.3027	14.4421	14.3979	14.7912	14.9655	15.1082	16.4305	16.5157	16.224	14.3287	14.1873	14.5431	14.4361	16.0269	15.5443	16.1802	16.0832	15.1758	15.2547	15.3139	15.1572	16.0084	15.6337	15.7645	15.8226	15.6343	15.8234	15.4381	15.4759	14.476	14.48	14.1594	14.1252	16.303	15.7429	14.674	14.6772	14.4973	14.5692	purple	0.236612	-0.0809583	-0.463599
Ec-00_010580	hypothetical protein	Unknown	OG0019911		4.79178	6.03601	3.45454	1.12909	2.61807	2.43173	3.15823	3.15114	1.4325	2.30532	2.81935	6.94376	7.21517	5.99872	7.08584	2.71999	2.60856	0	1.16871	6.78615	6.62649	2.74071	0	6.93616	6.50695	6.00885	4.42648	6.01283	6.80551	5.68407	5.8397	6.50164	7.64327	7.22443	7.15574	6.21338	3.5788	6.21451	6.36624	7.46094	7.45829	turquoise	0.525751	0.72558	0.940608
Ec-00_010590	expressed unknown protein	Unknown	OG0019912		0	0	6.28273	6.5114	5.96973	7.36715	5.91779	5.5542	0	1.21055	0	0	0	0	0	6.58508	6.45421	6.20912	6.44492	6.87065	6.78252	0	0	0	1.20982	0	0	0	0	0	0	0	0	0	0	8.42042	7.47208	7.37006	7.28987	6.71167	4.89727	black	-0.257446	-0.10962	-0.285975
Ec-00_010600	S-adenosyl-L-methionine-dependent methyltransferase	Metabolism	OG0005962		5.50776	5.77737	7.2601	8.03445	7.65414	8.06422	7.64511	7.74933	7.06106	7.34566	6.98541	6.24111	5.82945	5.23459	5.68956	6.2244	6.61294	6.74358	6.44492	6.57213	6.75766	6.22674	6.49683	7.85821	7.20369	6.76147	6.34461	7.40097	7.11421	6.35452	6.42938	6.59415	6.42176	6.29139	5.5139	7.63109	7.1494	6.27642	6.78627	5.95396	5.89796	yellow	-0.500708	-0.0656694	-0.448294
Ec-00_010610	hypothetical protein	Unknown	OG0019913		5.7655	5.77737	5.82035	6.22124	5.33632	6.77373	6.19647	6.00154	5.26233	5.63307	5.58354	6.15073	5.93113	6.26099	5.84806	0	1.1857	1.86945	1.16871	1.53706	1.52649	6.33228	6.84567	6.48308	6.88901	7.14536	7.16203	6.9407	6.62725	7.0606	6.93234	5.85319	5.82479	6.34655	6.29909	2.34107	1.24404	0	0	1.20016	1.02048	black	-0.2572	-0.0340559	0.0281518
Ec-00_010620	hypothetical protein	Unknown	OG0019914		5.9841	6.03601	4.05795	4.99401	4.43009	5.74805	5.89395	4.96441	5.197	6.08804	6.17366	7.00952	6.89658	6.40358	7.05366	5.01331	4.41925	5.39698	5.00911	8.23611	7.75098	4.17409	5.21352	7.59806	7.54537	7.75112	7.25972	7.14736	7.26944	7.1093	6.91843	7.61048	7.48656	7.72871	8.25368	8.86618	7.90993	6.47431	7.46645	7.41779	7.28833	turquoise	0.643899	0.832551	0.764193
Ec-00_010630	hypothetical protein	Unknown	OG0019915		5.19374	6.44554	4.28557	4.62902	4.64289	3.29142	4.23546	4.27761	0	3.15146	2.47088	7.34797	7.03589	6.99642	7.28686	3.46723	4.58167	3.83488	3.8806	7.96124	7.83657	5.70476	5.90466	6.75405	7.04059	6.47897	6.07271	6.23202	6.73312	6.64616	6.79186	8.77959	9.23021	7.10156	8.3859	6.71015	5.34658	6.88528	7.40388	7.45027	7.91702	turquoise	0.56254	0.660688	0.890648
Ec-00_010635	lncRNA	Unknown	NA		0	0	1.94355	0	1.43994	3.49261	3.31008	2.92022	0	0	0	0	0	0	0	0	0	0	0	0	0	0	0	0	0	0	0	0	0	0	0	0.485483	0.489014	0.59332	0.808298	0	0	0	0	0	0	NA	NA	NA	NA
Ec-00_010640	hypothetical protein	Unknown	OG0019916		5.7655	5.462	5.01398	4.62902	4.43009	5.9666	5.8697	5.5542	5.55081	6.08804	6.04719	7.93337	8.00092	6.60595	6.85221	6.81729	5.03863	6.65137	5.83705	7.60738	7.51918	5.88901	6.0358	6.93616	6.78977	7.01616	6.77066	5.77434	6.43526	5.68407	6.00682	7.25381	7.46035	6.64673	6.56823	6.53142	4.33345	6.2458	7.00679	6.43705	7.17994	turquoise	0.635224	0.285045	0.601338
Ec-00_010650	Hypothetical protein	Unknown	OG0019917		0	0	0	0	0	2.77832	0.993432	0	1.4325	1.85938	2.0105	2.15218	1.86482	1.76139	1.99878	1.08252	0	0	1.16871	4.10158	3.50394	2.39589	1.53617	3.15725	2.91943	3.21238	3.46382	3.22108	2.97141	2.36915	1.74182	3.70062	3.36179	2.34191	3.21142	5.2327	4.00492	1.39397	2.40305	2.29071	3.03565	NA	NA	NA	NA
Ec-00_010655	lncRNA	Unknown	NA		0	0	0	1.12909	0	0	0	0	0	0	0	0	0	0	0	0	0	0	0	2.52483	1.93405	0	0	6.49369	6.71059	5.13658	5.14824	7.0436	6.82306	5.81795	5.60504	0	0	0	0	3.48116	0	3.96828	5.34608	4.44377	4.49828	lightgreen	0.373343	0.6682	0.465199
Ec-00_010660	conserved unknown protein	Unknown	OG0019918		3.3074	0	0	0	0	0	0	1.21034	0	0	0	2.15218	2.00709	0	2.93718	0	0	0	0	3.25687	3.09142	1.27561	0	5.00113	5.10785	6.82598	6.57331	6.48456	5.54992	7.05609	6.79186	2.53622	2.89836	1.60163	2.6457	1.60093	0	7.08878	6.89425	6.27727	5.28754	lightgreen	0.509836	0.731634	0.653924
Ec-00_010670	hypothetical protein	Unknown	OG0019919		0	0	0	0	0	3.05756	1.99014	1.21034	0	0	0	0	0	0	0	0	0	0	0	0.964221	0	0	0	0	0	0	0	0	0	0	0	0	0	0	0	0	0	0	0	1.20016	1.02048	NA	NA	NA	NA
Ec-00_010690	protein kinase, TKL group	Cellular regulation and signalling	OG0000048		4.23263	0	0	0	1.43994	1.30166	2.31141	2.64517	3.24728	1.21055	2.0105	4.48771	4.16878	6.26099	5.27143	2.45179	3.11244	3.96316	3.45744	4.68517	4.08637	3.25187	4.01809	5.2715	5.61258	4.80794	4.23923	5.88933	5.6118	5.31279	5.35253	5.24051	5.03893	5.43374	5.26893	5.38086	4.33345	4.92144	5.77123	4.35508	4.79407	brown	0.839326	0.605104	0.686639
Ec-00_010700	ammonium transporter	Membrane function and transporters	OG0019920		8.28768	8.562	8.14366	8.56879	8.01102	7.88805	8.1417	8.30534	6.7094	6.92969	9.44337	7.43671	8.03454	6.55795	6.43579	6.94056	7.34777	7.15972	6.69132	6.52821	6.38814	7.04147	7.39422	6.92837	6.12799	5.22429	5.65234	5.94355	5.90328	6.58486	6.62483	7.43816	8.16526	7.29623	7.33086	5.30868	6.63719	6.92448	5.98171	7.04509	6.65497	blue	-0.590526	-0.481223	-0.308384
Ec-00_010710	hypothetical protein	Unknown	OG0004703		0	0	1.27694	1.12909	1.43994	3.05756	4.37978	1.21034	4.29944	3.15146	3.09981	4.43763	4.90999	4.49263	4.36768	4.90983	5.34045	5.44171	4.39023	5.17741	5.33977	3.25187	3.83811	4.66812	4.00904	4.72014	5.25097	4.26027	4.38161	5.66049	5.93492	5.02699	5.39765	4.7789	4.22125	3.92919	4.60088	4.92144	5.09767	6.17734	6.5794	brown	0.841895	0.327266	0.341629
Ec-00_010720	Protein kinase-like domain	Cellular regulation and signalling	OG0000048		3.3074	3.55699	2.74265	1.12909	2.14606	6.77373	6.25379	4.90238	5.49754	5.67078	6.28993	7.30322	7.25136	7.84839	7.3907	7.49949	6.93192	6.98938	6.74267	7.28554	7.35485	5.70476	5.94971	6.48308	6.18117	7.69466	7.57894	6.09499	5.83574	7.47968	7.45672	8.02146	7.46366	7.50457	7.11332	7.29986	7.30733	6.80354	6.71443	6.98724	7.16967	brown	0.86067	0.314106	0.360827
Ec-00_010730	expressed unknown protein	Unknown	OG0019921		12.3089	12.4007	7.2055	8.73478	8.03006	8.95482	7.3963	7.40244	8.4129	7.44693	8.24035	6.61803	6.29934	6.19975	6.27761	6.34832	6.27583	6.07357	6.17277	5.99473	6.06241	6.7492	6.98203	8.15069	8.54658	6.58218	6.08203	8.97807	8.61626	6.15809	6.0753	6.01366	6.13749	6.79289	6.28526	7.47496	8.02051	7.5687	7.50953	7.85787	7.05159	blue	-0.521496	0.0879106	-0.0142191
Ec-00_010740	Conserved protein	Cell wall and extracellular	OG0019922		0	4.49436	4.94899	4.23329	3.87821	4.84987	7.1866	5.42779	4.02612	5.08136	7.34929	7.79103	8.13869	8.35608	7.7172	5.61655	7.58654	8.32552	7.36196	5.05894	5.23559	7.01	7.04567	3.35635	4.37131	4.91725	3.51976	4.20214	3.30684	2.7725	3.37549	4.71169	6.75925	4.02338	0.460032	2.34107	1.90196	6.64829	6.02986	4.75238	4.20836	lightyellow	0.117192	-0.609089	-0.237855
Ec-00_010750	Hypothetical protein	Unknown	OG0019923		5.19374	6.03601	5.13578	4.99401	4.43009	4.84987	4.89417	4.90238	6.8647	6.79958	6.20362	6.10332	5.18909	4.967	4.78851	6.61828	5.80255	5.09483	5.48168	4.92985	5.1233	6.47739	6.84567	6.00832	6.32988	3.52027	3.40562	6.9047	6.31641	3.56469	3.14	4.77629	4.96631	5.11166	5.16705	6.29036	4.95927	4.84177	5.30754	4.88501	4.49828	grey	-0.0288056	-0.313037	-0.233489
Ec-00_010760	Peptidase C19, ubiquitin carboxyl-terminal hydrolase	Proteolysis	OG0019924		6.86662	6.44554	6.33453	5.52713	5.61372	5.44257	5.27258	5.84546	7.70249	7.52107	7.32223	7.55302	6.61482	6.8041	6.64704	8.70321	7.79963	7.51407	7.58466	7.06761	7.26949	8.11205	8.01922	7.08387	7.26039	6.76878	6.63793	7.54239	7.30109	6.9385	6.85653	6.20574	6.26407	6.83849	6.57393	7.4416	6.78775	6.86528	7.29972	6.69369	6.92297	lightcyan	0.514657	-0.116893	-0.0925298
Ec-00_010770	Protein N-terminal glutamine amidohydrolase, alpha beta roll	Protein binding or modification	OG0008820		12.574	12.5839	9.27639	8.84318	8.42466	8.56048	8.68035	8.04322	7.4314	7.0774	7.97971	9.13972	8.34536	7.0922	7.92714	7.76713	8.47837	5.8261	5.92859	6.83504	6.96735	7.96391	8.07111	7.53271	7.81303	8.5327	8.48845	7.15504	7.4553	6.60353	6.77137	7.13975	6.99655	8.29864	7.37396	7.42462	9.44629	6.96264	6.52585	7.55353	6.44959	tan	-0.564929	-0.105243	-0.050907
Ec-00_010780	Tetratricopeptide-like helical domain	Protein binding or modification	OG0019925		5.19374	3.55699	3.25392	0	0	6.90299	6.80713	5.28924	6.61252	6.22107	6.74177	7.39794	7.43879	7.73966	7.6253	8.10248	7.1022	7.00437	7.19995	7.46709	7.45876	6.50022	6.79719	7.04834	7.2542	8.04109	7.92548	6.39658	6.36513	7.7878	7.57675	8.01031	7.42013	7.76965	7.12113	7.57065	7.26944	6.55146	6.71443	6.30121	6.08446	brown	0.79895	0.25681	0.26836
Ec-00_010790	tRNA Arg	Protein synthesis	NA		0	0	0	0	0	0	0.993432	0	0	0	0	0	0	0	0	0	0	0	0	0	0	0	0	0	0	0	0	0	0	0	0	0	0	0	0	0	0	0	0	0	0	NA	NA	NA	NA
Ec-00_010800	Mannuronan C-5-epimerase	Cell wall and extracellular	OG0005499		13.6706	13.6433	12.4956	12.6043	12.641	12.0685	13.1733	12.9412	13.0668	12.6332	13.9149	14.5503	15.1641	14.8825	13.7998	12.1274	12.7077	13.4329	13.3365	12.9105	13.2238	13.2761	13.2872	13.3582	13.2977	12.3384	12.2352	13.2427	13.3829	13.2585	13.0469	14.4338	15.062	13.4391	14.8676	12.147	11.1572	14.6808	14.9434	13.8934	13.765	turquoise	0.416007	0.0982141	0.560612
Ec-00_010810	hypothetical protein	Unknown	OG0000313		0	0	0	0	0	0	0	0	0	0	0	0	0.462012	2.71748	2.22111	2.12208	0	0	0	0	0.95637	0	0	1.21426	0	0	0	0	0	0	0.83311	0	0.489014	0	0.460032	0	0	0	0	0	0	NA	NA	NA	NA
Ec-00_010820	Hypothetical protein	Unknown	OG0019926		9.26464	9.18626	5.707	5.82779	6.22232	6.90299	6.11631	5.59399	5.7911	6.79958	5.10103	5.71905	6.29241	5.88661	5.22081	4.40049	3.90901	4.78342	4.69834	5.13899	4.43891	3.45247	4.01809	6.58579	6.30613	3.65263	2.16669	5.83298	6.13164	4.30369	3.7965	5.78155	6.31614	6.02454	6.14683	5.75136	2.69475	4.36008	4.85199	5.4957	5.03942	blue	-0.412201	0.0312378	0.21896
Ec-00_010830	Glutathione reductase	Redox	OG0008235		10.0858	10.045	10.8763	10.8192	10.4763	10.9387	11.2803	11.2035	10.364	10.1286	11.1407	11.1611	11.2924	11.4176	11.232	10.6168	11.1363	11.0634	10.8114	10.6427	10.701	11.4374	11.7202	10.9221	10.873	11.6063	12.101	10.1973	10.551	11.2425	11.2949	10.875	10.6504	10.7434	10.6501	9.93525	11.2534	10.3263	10.2389	10.2779	9.97579	royalblue	0.0757469	-0.311212	-0.244558
Ec-00_010840	Hypothetical protein	Unknown	NA		6.49182	5.462	7.38819	6.81503	6.59891	8.00786	7.36195	7.18519	6.50866	6.84975	7.36262	6.62923	6.51117	6.9783	7.00961	7.07819	6.88601	7.22516	6.91669	6.19528	6.74507	7.96391	8.19789	8.09257	8.15957	7.47086	7.03821	7.56563	7.81667	6.11538	6.24099	6.44976	5.88513	6.42552	6.28526	7.07899	7.26944	5.89744	5.68365	5.8278	4.28648	purple	-0.207599	-0.308023	-0.425044
Ec-00_010850	hypothetical protein	Unknown	OG0019927		6.17389	6.03601	4.17624	4.32159	5.06818	5.34193	5.57207	5.743	3.48477	4.6239	4.56798	7.8898	7.57354	6.98739	7.63742	4.0573	3.11244	2.65715	3.75286	7.93905	7.37133	3.45247	4.97287	7.93026	7.98738	6.7168	5.63977	7.37489	7.5479	6.58486	6.40297	6.62955	7.5091	7.73906	8.52183	7.78533	4.60088	6.96264	7.75844	8.41905	8.90477	turquoise	0.472124	0.698374	0.922267
Ec-00_010860	hypothetical protein	Unknown	OG0007288		6.34159	6.61362	3.25392	4.32159	4.31063	3.66915	4.37978	3.68092	3.68863	3.95017	4.14247	8.09155	7.97519	7.0922	8.01704	3.84928	4.13517	2.3164	3.28344	7.58611	7.17876	3.62854	4.17809	8.90164	8.73621	7.0822	5.87242	8.33717	8.86942	6.70496	6.82207	7.69925	8.39012	8.14378	7.91058	7.83756	5.83574	7.26709	7.67763	8.90249	8.97132	turquoise	0.586836	0.774969	0.95783
Ec-00_010870	hypothetical protein	Unknown	OG0019928		0	0	0	0	0	0	0	0	0	0	0	0.467569	0	0	0.999185	0	0	0	0	0.964221	0	0	0	0	0	0	0	0.812953	0	0	0	0	0	0	0	0	0	0	0	0	0	NA	NA	NA	NA
Ec-00_010880	RmlC-like jelly roll fold	Metabolism	OG0003225		9.69467	9.87337	5.19303	6.1981	6.62419	4.42706	3.98766	5.18887	3.86722	3.82197	3.33452	10.2465	10.5915	9.23873	9.19313	5.20036	4.72763	4.91615	5.67028	10.2884	9.80781	6.05238	5.65553	9.7097	9.53574	8.16263	7.87275	9.09049	9.56053	8.35965	8.37663	9.66944	10.379	9.67864	9.96798	7.81168	6.2531	8.91555	9.16931	9.76343	8.98895	turquoise	0.491496	0.692684	0.971586
Ec-00_010890	conserved unknown protein	Unknown	OG0007065		7.07143	6.61362	9.27639	9.32129	9.22609	8.91596	9.60524	9.5122	8.64493	8.5223	8.53358	7.5203	7.43879	6.50831	7.0318	8.92178	7.39224	8.79077	8.5572	8.60719	8.63269	7.27117	6.96018	8.2194	7.95339	7.89838	8.53331	7.73407	8.21911	7.23432	7.39777	7.71582	7.64035	6.89508	5.95053	7.97216	7.19053	7.20477	7.93949	7.30393	7.63292	turquoise	-0.576547	-0.329618	-0.576156
Ec-00_010900	hypothetical protein	Unknown	OG0019929		4.79178	3.55699	5.54052	5.24045	5.14003	5.53665	4.63122	5.02389	6.24341	6.53913	6.26173	5.80057	5.09663	5.96231	5.64226	5.64905	6.32253	5.92394	5.95785	5.83566	5.49824	5.01177	5.28558	5.81888	4.76881	4.0863	5.13038	4.56707	4.86078	3.61462	3.75535	5.11289	4.92858	4.95486	5.15189	5.75136	4.68003	3.80983	4.74067	3.80494	4.79407	lightyellow	-0.0900742	-0.535175	-0.454402
Ec-00_010910	Molybdenum cofactor biosynthesis, MoeB	Metabolism	OG0019930		9.75535	9.78808	8.68762	8.91944	8.76292	8.89835	8.68731	8.6689	8.82868	9.44072	9.16751	8.7727	8.80221	9.06291	9.27061	8.74515	8.64383	9.59981	9.33599	9.18975	9.01483	8.40599	8.74972	6.99707	7.12444	6.70922	6.34461	6.85841	7.07813	6.94827	6.43591	8.72335	8.75193	9.26687	9.39425	9.59181	7.56885	7.26709	6.63883	7.92103	7.5323	lightgreen	-0.329752	-0.478789	-0.276709
Ec-00_010920	Ubiquitin-related domain	Proteolysis	OG0006162		11.6259	11.3602	9.88358	9.73309	10.033	8.76381	8.83549	9.2758	9.03435	9.08341	8.52174	7.19808	7.24419	7.19776	7.47141	8.21529	8.39887	7.90601	7.96936	7.76075	7.74467	8.13411	7.68808	7.3867	7.37894	8.17369	8.13252	7.54239	7.78121	7.83595	7.90542	7.23094	7.30706	7.45941	7.45957	8.2859	8.04315	7.95685	7.85515	7.75763	8.46682	red	-0.818735	-0.244296	-0.398898
Ec-00_010930	Quinonprotein alcohol dehydrogenase-like superfamily	Metabolism	OG0006544		6.49182	5.77737	7.2601	7.52223	6.91786	8.04034	7.96417	7.58134	7.4314	7.93155	7.42753	7.25704	6.95919	6.89383	7.09992	7.71436	6.96173	7.07706	7.22424	6.72262	7.26949	7.8171	8.09135	7.94579	8.16288	7.15097	7.23486	8.24301	7.93031	6.57859	6.5365	6.99342	7.0011	6.71818	6.83823	7.91253	6.67633	6.96264	6.97025	6.4585	6.21004	purple	-0.141941	-0.258482	-0.372724
Ec-00_010940	Kelch-type beta propeller	Metabolism	OG0003967		6.17389	5.05783	6.25611	6.67119	7.03556	7.36715	7.15685	7.2736	5.7911	6.03119	6.17366	7.20559	7.10477	6.15206	6.39071	6.04065	5.80255	5.52722	5.52142	6.51327	5.86705	5.98923	5.35421	6.95931	6.94389	7.20047	6.70582	7.0844	6.60713	7.17316	6.97778	6.9474	7.09776	7.68658	6.68868	6.32737	6.67633	7.12288	6.55904	7.43953	7.05159	grey	0.104186	0.425573	0.457677
Ec-00_010950	Bromodomain and RING/FYVE/PHD-type zinc finger protein	Cellular regulation and signalling	OG0019931		13.6174	13.7554	7.29974	8.09834	8.19093	8.29035	7.47072	7.2979	8.49673	8.35286	8.00545	7.9106	8.24303	7.91182	7.81429	7.01725	7.69702	7.47156	7.74434	7.48252	7.41968	7.08741	7.51903	8.2162	8.27415	6.75412	6.5995	8.2102	8.33981	7.21017	7.10608	8.0435	8.07316	8.02483	8.05204	7.85033	7.81667	7.42576	7.21896	7.43953	6.6101	blue	-0.36081	0.0693741	0.127305
Ec-00_010960	similar to transmembrane protein 97	Membrane function and transporters	OG0005056		9.01454	8.78971	7.66606	7.82381	7.80543	9.56695	9.12128	9.05124	10.4043	10.4972	10.5113	9.92099	9.9763	9.94396	9.74656	11.0986	10.1604	11.4592	11.0466	10.2153	10.0963	10.5008	10.6499	10.4672	10.727	9.12636	9.13107	10.07	10.0447	8.86538	8.7795	10.0568	9.80138	10.1064	10.1091	10.4449	9.8784	8.88109	9.04596	9.11997	8.39369	purple	0.50215	-0.130167	-0.120867
Ec-00_010970	Hypothetical protein	Unknown	OG0019932		9.01454	9.3138	7.23306	7.85374	7.38517	8.40703	7.63076	7.18519	8.27726	7.21137	8.87814	8.96509	9.03595	9.73863	8.61308	7.91476	6.83859	7.86554	7.64887	6.4519	7.61917	8.65515	9.03223	11.3925	11.7263	7.79475	6.34461	11.4853	11.6424	7.36038	7.01748	8.98262	9.27975	8.0555	9.24418	9.87092	6.51298	9.19341	9.62806	8.00359	7.41547	grey	0.223169	0.289472	0.443411
Ec-00_010980	Cycloartenol synthase	Metabolism	OG0019933		10.4586	10.4072	8.26876	8.80539	8.40292	9.14604	9.30653	8.95903	9.11614	8.98207	9.78298	9.29635	9.34314	10.3054	10.1494	9.57399	8.48865	11.2153	10.9831	10.4638	10.4593	9.78699	10.0017	10.957	10.6275	9.39913	9.49169	10.7712	10.6842	9.75951	9.502	9.81238	9.6444	10.5178	11.1255	10.0913	9.04041	9.6238	10.4316	9.68372	10.7779	brown	0.536062	0.437522	0.488673
Ec-00_010990	RmlC-like jelly roll fold	Metabolism	OG0019934		8.5838	8.64196	4.57119	5.63447	5.75771	6.58847	6.11631	5.77797	5.87703	6.0019	5.03592	6.91201	6.99805	6.2759	6.41905	2.94606	0	3.538	3.45744	3.51868	3.50394	2.74071	4.17809	7.7737	7.6622	6.09281	5.6894	7.33488	7.28851	5.91079	5.58169	6.43649	6.90237	6.95546	6.5965	4.77789	3.87637	4.11103	5.05177	4.35508	4.89727	turquoise	-0.143547	0.362888	0.4615
Ec-00_011000	Hypothetical protein	Unknown	NA		0	0	0	2.52327	2.61807	3.49261	1.99014	0	0	0	0	0.820122	0.462012	0.845388	0.736313	0	0	1.21845	0	0.964221	0	0	0	2.31053	1.85845	0	0.904947	1.70947	1.24404	0.502471	1.11921	1.92615	1.77438	1.33694	1.85957	0	0	0	1.05124	0	0	NA	NA	NA	NA
Ec-00_011005	lncRNA	Unknown	NA		5.7655	6.03601	4.94899	5.19441	6.18883	6.29741	6.13677	5.38307	5.05675	5.47153	4.96773	7.18296	7.26912	7.48119	6.97566	5.0624	4.6565	5.2538	5.59777	5.71024	5.61357	4.94678	4.17809	7.71145	8.24635	6.42446	5.97604	8.05874	8.19236	5.97909	5.61658	7.03362	7.68346	6.73205	7.08566	7.2234	5.76488	6.50048	6.30885	6.47963	5.65456	turquoise	0.358042	0.584522	0.73825
Ec-00_011010	conserved unknown protein	Unknown	OG0000562		0	0	0	0	0	0	0	1.21034	0	0	0	3.2359	3.27525	1.76139	3.05746	0	0	0	1.16871	3.10569	3.09142	0	0	6.16252	6.28199	7.58295	7.50464	7.36168	6.69551	7.58986	7.80059	3.51114	3.91858	3.19211	3.37703	2.82785	0	7.58102	7.44885	7.00192	6.98286	lightgreen	0.59367	0.736746	0.696953
Ec-00_011020	Hypothetical protein	Unknown	OG0019935		0	0	0	0	0	0	0	0	0	0	0	0	0	0	0	0	0	0	0	0	0	0	0	0	0	0	0	0	0	0	0	0	0	0	0	0	0	0	0	0	0	NA	NA	NA	NA
Ec-00_011040	Hypothetical protein	Unknown	OG0019936		0	0	3.78756	2.79411	3.25783	2.77832	4.44687	4.06756	0	0	0	0	0	0	0	5.28552	4.79543	4.78342	4.3017	5.83566	5.00153	0	0	0	0	0	0	0.812953	0	0	0	0	0	0	0	4.41507	5.34658	4.92144	4.68162	5.06356	5.43203	black	-0.116183	-0.0723229	-0.211245
[truncated: 17,233 more rows]
[truncated: 65 more columns]
