# Supplementary material for: Life-cycle-related gene expression patterns in the brown algae
Source: bioRxiv preprint, doi:10.1101/2025.04.25.649966, version 3 (2025-08-12)
Supplement: Table S7 [file 649966_file26.xlsx]

## Sheet: Orthogroups_Ectocarpus_Dictyota
Orthogroup	One-to-one orthologue	Dictyota dichotoma	Ectocarpus species 7
OG0000000	FALSE	prot_D-dichotoma_M_contig1116.988.1,prot_D-dichotoma_M_contig1364.2721.1,prot_D-dichotoma_M_contig141.3039.1,prot_D-dichotoma_M_contig1425.3120.1,prot_D-dichotoma_M_contig1442.3239.1,prot_D-dichotoma_M_contig1442.3240.1,prot_D-dichotoma_M_contig151.3643.1,prot_D-dichotoma_M_contig153.3760.1,prot_D-dichotoma_M_contig1632.4414.1,prot_D-dichotoma_M_contig1632.4415.1,prot_D-dichotoma_M_contig1632.441…	Ec-00_007250.1,Ec-00_008820.1,Ec-00_008840.1,Ec-07_001980.1,Ec-09_002600.1,Ec-13_002890.1
OG0000001	FALSE	prot_D-dichotoma_M_contig1049.479.1,prot_D-dichotoma_M_contig1222.1783.1,prot_D-dichotoma_M_contig1587.4068.1,prot_D-dichotoma_M_contig2132.7023.1,prot_D-dichotoma_M_contig3332.11441.1	Ec-05_006530.1,Ec-05_006540.1,Ec-06_003420.1,Ec-07_006970.1,Ec-07_006990.1,Ec-07_007050.1,Ec-07_007160.1,Ec-13_001560.1,Ec-13_004400.1,Ec-21_000380.1,Ec-21_000430.1,Ec-21_000460.1,Ec-21_000470.1,Ec-21_000480.1,Ec-21_000490.1,Ec-21_000500.1,Ec-21_000510.1,Ec-21_000520.1,Ec-21_000530.1,Ec-21_000540.1,Ec-21_000550.1,Ec-21_000560.1,Ec-21_000580.1,Ec-21_000590.1,Ec-21_000600.1,Ec-21_000660.1,Ec-21_000…
OG0000002	FALSE	prot_D-dichotoma_M_contig1140.1181.1,prot_D-dichotoma_M_contig1324.2500.1,prot_D-dichotoma_M_contig149.3508.1,prot_D-dichotoma_M_contig153.3763.1,prot_D-dichotoma_M_contig1718.4881.1,prot_D-dichotoma_M_contig177.5117.1,prot_D-dichotoma_M_contig1889.5698.1,prot_D-dichotoma_M_contig2288.7698.1,prot_D-dichotoma_M_contig2378.8095.1,prot_D-dichotoma_M_contig2534.8722.1,prot_D-dichotoma_M_contig2673.92…	NA
OG0000003	FALSE	prot_D-dichotoma_M_contig1153.1263.1,prot_D-dichotoma_M_contig1198.1593.1,prot_D-dichotoma_M_contig1501.3608.1,prot_D-dichotoma_M_contig18.5274.1,prot_D-dichotoma_M_contig1881.5672.1,prot_D-dichotoma_M_contig1888.5691.1,prot_D-dichotoma_M_contig1910.5835.1,prot_D-dichotoma_M_contig1995.6227.1,prot_D-dichotoma_M_contig2058.6591.1,prot_D-dichotoma_M_contig2608.8997.1,prot_D-dichotoma_M_contig2771.9…	Ec-00_004910.1,Ec-14_005700.1,Ec-15_003280.1,Ec-16_002920.1
OG0000004	TRUE	prot_D-dichotoma_M_contig1121.1043.1,prot_D-dichotoma_M_contig1225.1796.1,prot_D-dichotoma_M_contig1298.2271.1,prot_D-dichotoma_M_contig1423.3108.1,prot_D-dichotoma_M_contig1467.3384.1,prot_D-dichotoma_M_contig1503.3622.1,prot_D-dichotoma_M_contig1595.4119.1,prot_D-dichotoma_M_contig207.6649.1,prot_D-dichotoma_M_contig2101.6877.1,prot_D-dichotoma_M_contig2119.6945.1,prot_D-dichotoma_M_contig2199.…	Ec-00_009355.1
OG0000005	TRUE	prot_D-dichotoma_M_contig1067.612.1,prot_D-dichotoma_M_contig1306.2370.1,prot_D-dichotoma_M_contig1356.2674.1,prot_D-dichotoma_M_contig1481.3462.1,prot_D-dichotoma_M_contig1868.5602.1,prot_D-dichotoma_M_contig1879.5646.1,prot_D-dichotoma_M_contig2030.6479.1,prot_D-dichotoma_M_contig207.6651.1,prot_D-dichotoma_M_contig207.6657.1,prot_D-dichotoma_M_contig212.6958.1,prot_D-dichotoma_M_contig2152.713…	Ec-03_003910.1
OG0000006	TRUE	prot_D-dichotoma_M_contig1006.139.1,prot_D-dichotoma_M_contig1480.3458.1,prot_D-dichotoma_M_contig1657.4547.1,prot_D-dichotoma_M_contig2129.7008.1,prot_D-dichotoma_M_contig2229.7449.1,prot_D-dichotoma_M_contig2268.7602.1,prot_D-dichotoma_M_contig2379.8097.1,prot_D-dichotoma_M_contig2379.8098.1,prot_D-dichotoma_M_contig2580.8890.1,prot_D-dichotoma_M_contig2789.9613.1,prot_D-dichotoma_M_contig2814.…	Ec-20_001180.1
OG0000007	FALSE	prot_D-dichotoma_M_contig1171.1401.1,prot_D-dichotoma_M_contig1198.1591.1,prot_D-dichotoma_M_contig1434.3180.1,prot_D-dichotoma_M_contig154.3819.1,prot_D-dichotoma_M_contig1544.3837.1,prot_D-dichotoma_M_contig158.4024.1,prot_D-dichotoma_M_contig18.5250.1,prot_D-dichotoma_M_contig2151.7126.1,prot_D-dichotoma_M_contig2325.7876.1,prot_D-dichotoma_M_contig3016.10468.1,prot_D-dichotoma_M_contig3580.12…	Ec-00_011120.1,Ec-07_000285.1
OG0000008	FALSE	prot_D-dichotoma_M_contig1026.306.1,prot_D-dichotoma_M_contig1119.1020.1,prot_D-dichotoma_M_contig1334.2554.1,prot_D-dichotoma_M_contig149.3509.1,prot_D-dichotoma_M_contig212.6947.1,prot_D-dichotoma_M_contig2205.7364.1,prot_D-dichotoma_M_contig2429.8316.1,prot_D-dichotoma_M_contig286.9858.1,prot_D-dichotoma_M_contig2971.10265.1,prot_D-dichotoma_M_contig3267.11230.1,prot_D-dichotoma_M_contig3594.1…	NA
OG0000009	TRUE	prot_D-dichotoma_M_contig1221.1781.1,prot_D-dichotoma_M_contig1243.1917.1,prot_D-dichotoma_M_contig1330.2547.1,prot_D-dichotoma_M_contig1412.3057.1,prot_D-dichotoma_M_contig15.3572.1,prot_D-dichotoma_M_contig15.3579.1,prot_D-dichotoma_M_contig2048.6547.1,prot_D-dichotoma_M_contig2201.7349.1,prot_D-dichotoma_M_contig2246.7522.1,prot_D-dichotoma_M_contig2464.8459.1,prot_D-dichotoma_M_contig253.8708…	Ec-19_003030.1
OG0000010	TRUE	prot_D-dichotoma_M_contig1240.1910.1,prot_D-dichotoma_M_contig1300.2339.1,prot_D-dichotoma_M_contig1478.3428.1,prot_D-dichotoma_M_contig2095.6813.1,prot_D-dichotoma_M_contig2095.6814.1,prot_D-dichotoma_M_contig2261.7583.1,prot_D-dichotoma_M_contig2261.7584.1,prot_D-dichotoma_M_contig276.9509.1,prot_D-dichotoma_M_contig276.9510.1,prot_D-dichotoma_M_contig276.9511.1,prot_D-dichotoma_M_contig276.951…	Ec-25_001760.1
OG0000011	FALSE	prot_D-dichotoma_M_contig1162.1333.1,prot_D-dichotoma_M_contig1162.1341.1,prot_D-dichotoma_M_contig1162.1344.1,prot_D-dichotoma_M_contig1180.1466.1,prot_D-dichotoma_M_contig1215.1735.1,prot_D-dichotoma_M_contig1647.4483.1,prot_D-dichotoma_M_contig227.7611.1,prot_D-dichotoma_M_contig227.7619.1,prot_D-dichotoma_M_contig227.7622.1,prot_D-dichotoma_M_contig4334.13953.1,prot_D-dichotoma_M_contig4417.1…	Ec-00_005420.1,Ec-07_000470.1,Ec-26_005840.1,Ec-26_005870.1,Ec-26_005920.1,Ec-26_006400.1,Ec-26_006490.1
OG0000012	TRUE	prot_D-dichotoma_M_contig1274.2120.1,prot_D-dichotoma_M_contig14.2955.1,prot_D-dichotoma_M_contig14.2956.1,prot_D-dichotoma_M_contig1539.3809.1,prot_D-dichotoma_M_contig1759.5073.1,prot_D-dichotoma_M_contig1968.6094.1,prot_D-dichotoma_M_contig2571.8848.1,prot_D-dichotoma_M_contig3041.10544.1,prot_D-dichotoma_M_contig3041.10545.1,prot_D-dichotoma_M_contig3682.12340.1,prot_D-dichotoma_M_contig3682.…	Ec-26_003170.1
OG0000013	TRUE	prot_D-dichotoma_M_contig1139.1155.1,prot_D-dichotoma_M_contig1199.1604.1,prot_D-dichotoma_M_contig1289.2199.1,prot_D-dichotoma_M_contig1348.2625.1,prot_D-dichotoma_M_contig155.3861.1,prot_D-dichotoma_M_contig1578.4010.1,prot_D-dichotoma_M_contig1657.4543.1,prot_D-dichotoma_M_contig1700.4786.1,prot_D-dichotoma_M_contig2268.7601.1,prot_D-dichotoma_M_contig2317.7850.1,prot_D-dichotoma_M_contig2814.…	Ec-12_000730.1
OG0000014	FALSE	prot_D-dichotoma_M_contig1156.1278.1,prot_D-dichotoma_M_contig1199.1602.1,prot_D-dichotoma_M_contig1235.1866.1,prot_D-dichotoma_M_contig129.2208.1,prot_D-dichotoma_M_contig1657.4546.1,prot_D-dichotoma_M_contig1934.5943.1,prot_D-dichotoma_M_contig2129.7007.1,prot_D-dichotoma_M_contig2456.8426.1,prot_D-dichotoma_M_contig2716.9385.1,prot_D-dichotoma_M_contig2978.10282.1,prot_D-dichotoma_M_contig3043…	NA
OG0000015	TRUE	prot_D-dichotoma_M_contig1038.395.1,prot_D-dichotoma_M_contig1407.3018.1,prot_D-dichotoma_M_contig1536.3787.1,prot_D-dichotoma_M_contig1774.5138.1,prot_D-dichotoma_M_contig1812.5366.1,prot_D-dichotoma_M_contig2301.7789.1,prot_D-dichotoma_M_contig257.8838.1,prot_D-dichotoma_M_contig2805.9703.1,prot_D-dichotoma_M_contig3033.10524.1,prot_D-dichotoma_M_contig3230.11153.1,prot_D-dichotoma_M_contig3250…	Ec-00_004470.1
OG0000016	FALSE	prot_D-dichotoma_M_contig1060.572.1,prot_D-dichotoma_M_contig1060.575.1,prot_D-dichotoma_M_contig1144.1203.1,prot_D-dichotoma_M_contig1221.1779.1,prot_D-dichotoma_M_contig1221.1780.1,prot_D-dichotoma_M_contig1654.4520.1,prot_D-dichotoma_M_contig1654.4521.1,prot_D-dichotoma_M_contig1962.6070.1,prot_D-dichotoma_M_contig1962.6071.1,prot_D-dichotoma_M_contig2067.6637.1,prot_D-dichotoma_M_contig2344.7…	Ec-08_002690.1,Ec-24_002340.1
OG0000017	TRUE	prot_D-dichotoma_M_contig10.68.1,prot_D-dichotoma_M_contig1115.981.1,prot_D-dichotoma_M_contig1119.1015.1,prot_D-dichotoma_M_contig14.2964.1,prot_D-dichotoma_M_contig1414.3063.1,prot_D-dichotoma_M_contig147.3399.1,prot_D-dichotoma_M_contig1658.4551.1,prot_D-dichotoma_M_contig166.4557.1,prot_D-dichotoma_M_contig181.5360.1,prot_D-dichotoma_M_contig20.6295.1,prot_D-dichotoma_M_contig21.6833.1,prot_D…	Ec-04_002470.1
OG0000018	FALSE	prot_D-dichotoma_M_contig1280.2145.1,prot_D-dichotoma_M_contig1453.3321.1,prot_D-dichotoma_M_contig167.4627.1,prot_D-dichotoma_M_contig1961.6067.1,prot_D-dichotoma_M_contig2036.6500.1,prot_D-dichotoma_M_contig2706.9354.1,prot_D-dichotoma_M_contig284.9807.1,prot_D-dichotoma_M_contig2896.9992.1,prot_D-dichotoma_M_contig3171.10948.1,prot_D-dichotoma_M_contig333.11433.1,prot_D-dichotoma_M_contig3672.…	Ec-05_000750.1,Ec-26_000070.1
OG0000019	FALSE	prot_D-dichotoma_M_contig1162.1334.1,prot_D-dichotoma_M_contig1162.1340.1,prot_D-dichotoma_M_contig1162.1346.1,prot_D-dichotoma_M_contig1180.1467.1,prot_D-dichotoma_M_contig1215.1734.1,prot_D-dichotoma_M_contig1647.4482.1,prot_D-dichotoma_M_contig182.5382.1,prot_D-dichotoma_M_contig215.7116.1,prot_D-dichotoma_M_contig2160.7161.1,prot_D-dichotoma_M_contig227.7609.1,prot_D-dichotoma_M_contig227.761…	Ec-00_005440.1,Ec-26_005820.1,Ec-26_005890.1,Ec-26_006380.1,Ec-26_006470.1
OG0000020	FALSE	prot_D-dichotoma_M_contig1056.521.1,prot_D-dichotoma_M_contig1629.4391.1,prot_D-dichotoma_M_contig1639.4436.1,prot_D-dichotoma_M_contig2.6282.1,prot_D-dichotoma_M_contig2074.6679.1,prot_D-dichotoma_M_contig218.7241.1,prot_D-dichotoma_M_contig2281.7671.1,prot_D-dichotoma_M_contig2345.7964.1,prot_D-dichotoma_M_contig250.8591.1,prot_D-dichotoma_M_contig2516.8661.1,prot_D-dichotoma_M_contig2609.8999.…	Ec-18_000330.1,Ec-22_000675.1
OG0000021	TRUE	prot_D-dichotoma_M_contig100.101.1,prot_D-dichotoma_M_contig1284.2173.1,prot_D-dichotoma_M_contig1326.2505.1,prot_D-dichotoma_M_contig2151.7124.1,prot_D-dichotoma_M_contig2211.7396.1,prot_D-dichotoma_M_contig2454.8415.1,prot_D-dichotoma_M_contig257.8839.1,prot_D-dichotoma_M_contig2646.9105.1,prot_D-dichotoma_M_contig286.9862.1,prot_D-dichotoma_M_contig3093.10702.1,prot_D-dichotoma_M_contig346.117…	Ec-00_003800.1
OG0000022	FALSE	prot_D-dichotoma_M_contig2257.7558.1,prot_D-dichotoma_M_contig456.14416.1	Ec-00_002480.1,Ec-00_007630.1,Ec-00_008800.1,Ec-03_002820.1,Ec-19_004360.1,Ec-19_004380.1,Ec-23_001740.1,Ec-23_001750.1,Ec-23_003690.1,Ec-23_003700.1,Ec-23_003740.1,Ec-23_003750.1,Ec-23_003820.1,Ec-23_003840.1,Ec-23_003860.1,Ec-26_000690.1,Ec-26_000700.1,Ec-26_001040.1
OG0000023	FALSE	prot_D-dichotoma_M_contig1677.4641.1,prot_D-dichotoma_M_contig1865.5579.1,prot_D-dichotoma_M_contig189.5706.1,prot_D-dichotoma_M_contig1991.6211.1,prot_D-dichotoma_M_contig2203.7357.1,prot_D-dichotoma_M_contig2278.7653.1,prot_D-dichotoma_M_contig279.9624.1,prot_D-dichotoma_M_contig2866.9882.1,prot_D-dichotoma_M_contig33.11351.1,prot_D-dichotoma_M_contig353.11958.1,prot_D-dichotoma_M_contig3686.12…	NA
OG0000024	FALSE	prot_D-dichotoma_M_contig100.94.1,prot_D-dichotoma_M_contig1235.1861.1,prot_D-dichotoma_M_contig1402.3002.1,prot_D-dichotoma_M_contig1661.4580.1,prot_D-dichotoma_M_contig2407.8240.1,prot_D-dichotoma_M_contig291.10071.1,prot_D-dichotoma_M_contig3190.11002.1,prot_D-dichotoma_M_contig3557.12009.1,prot_D-dichotoma_M_contig41.13403.1,prot_D-dichotoma_M_contig4581.14465.1,prot_D-dichotoma_M_contig4675.…	Ec-00_006500.1,Ec-13_002392.1
OG0000025	FALSE	NA	Ec-00_007610.1,Ec-01_001760.1,Ec-01_001800.1,Ec-03_000700.1,Ec-03_000710.1,Ec-03_000720.1,Ec-03_000770.1,Ec-03_000780.1,Ec-03_001790.1,Ec-06_001640.1,Ec-12_003110.1,Ec-15_004730.1,Ec-15_004840.1,Ec-15_004850.1,Ec-17_002300.1,Ec-19_000130.1,Ec-19_000270.1,Ec-19_000290.1,Ec-23_004280.1
OG0000026	TRUE	prot_D-dichotoma_M_contig1121.1045.1,prot_D-dichotoma_M_contig1468.3391.1,prot_D-dichotoma_M_contig1803.5319.1,prot_D-dichotoma_M_contig1830.5430.1,prot_D-dichotoma_M_contig1901.5778.1,prot_D-dichotoma_M_contig2220.7417.1,prot_D-dichotoma_M_contig2220.7420.1,prot_D-dichotoma_M_contig3162.10931.1,prot_D-dichotoma_M_contig3604.12153.1,prot_D-dichotoma_M_contig4271.13812.1,prot_D-dichotoma_M_contig4…	Ec-19_002200.1
OG0000027	FALSE	prot_D-dichotoma_M_contig1996.6229.1,prot_D-dichotoma_M_contig1996.6230.1,prot_D-dichotoma_M_contig1996.6233.1,prot_D-dichotoma_M_contig2142.7065.1,prot_D-dichotoma_M_contig407.13337.1,prot_D-dichotoma_M_contig407.13339.1,prot_D-dichotoma_M_contig407.13340.1,prot_D-dichotoma_M_contig407.13341.1,prot_D-dichotoma_M_contig407.13342.1,prot_D-dichotoma_M_contig4226.13719.1,prot_D-dichotoma_M_contig589…	Ec-00_006370.1,Ec-00_006380.1,Ec-18_000130.1,Ec-18_000150.1
OG0000028	FALSE	prot_D-dichotoma_M_contig1517.3675.1,prot_D-dichotoma_M_contig1517.3676.1,prot_D-dichotoma_M_contig1556.3896.1,prot_D-dichotoma_M_contig1638.4433.1,prot_D-dichotoma_M_contig183.5422.1,prot_D-dichotoma_M_contig2062.6623.1,prot_D-dichotoma_M_contig2257.7559.1,prot_D-dichotoma_M_contig2535.8723.1,prot_D-dichotoma_M_contig3060.10601.1,prot_D-dichotoma_M_contig3080.10659.1,prot_D-dichotoma_M_contig332…	NA
OG0000029	FALSE	NA	Ec-00_003130.1,Ec-00_003440.1,Ec-02_000020.1,Ec-02_004670.1,Ec-06_009400.1,Ec-06_009420.1,Ec-06_011020.1,Ec-17_000460.1,Ec-17_000980.1,Ec-18_000580.1,Ec-18_004290.1,Ec-18_004350.1,Ec-19_005200.1,Ec-19_005430.1,Ec-25_001220.1,Ec-27_006380.1
OG0000030	FALSE	prot_D-dichotoma_M_contig1083.714.1,prot_D-dichotoma_M_contig1154.1270.1,prot_D-dichotoma_M_contig1502.3611.1,prot_D-dichotoma_M_contig173.4931.1,prot_D-dichotoma_M_contig180.5306.1,prot_D-dichotoma_M_contig2159.7151.1,prot_D-dichotoma_M_contig23.7764.1,prot_D-dichotoma_M_contig3058.10582.1,prot_D-dichotoma_M_contig314.10860.1,prot_D-dichotoma_M_contig408.13362.1,prot_D-dichotoma_M_contig621.1711…	Ec-08_006560.1,Ec-15_001220.1,Ec-26_006530.1
OG0000031	TRUE	prot_D-dichotoma_M_contig1093.814.1,prot_D-dichotoma_M_contig1229.1809.1,prot_D-dichotoma_M_contig2140.7055.1,prot_D-dichotoma_M_contig3461.11768.1,prot_D-dichotoma_M_contig3948.12995.1,prot_D-dichotoma_M_contig3964.13033.1,prot_D-dichotoma_M_contig3989.13072.1,prot_D-dichotoma_M_contig401.13192.1,prot_D-dichotoma_M_contig4239.13741.1,prot_D-dichotoma_M_contig4727.14743.1,prot_D-dichotoma_M_conti…	Ec-16_002320.1
OG0000032	TRUE	prot_D-dichotoma_M_contig484.14964.1	Ec-09_001420.1,Ec-10_003790.1,Ec-13_004330.1,Ec-15_000200.1,Ec-22_001500.1,Ec-22_001535.1,Ec-22_003120.1,Ec-22_003155.1,Ec-22_003160.1,Ec-22_003170.1,Ec-22_003210.1,Ec-23_002620.1,Ec-24_004350.1,Ec-25_003490.1
OG0000033	FALSE	prot_D-dichotoma_M_contig3244.11189.1,prot_D-dichotoma_M_contig36.12109.1,prot_D-dichotoma_M_contig36.12111.1,prot_D-dichotoma_M_contig36.12113.1,prot_D-dichotoma_M_contig397.13042.1	Ec-00_000010.1,Ec-00_000900.1,Ec-00_003170.1,Ec-00_006340.1,Ec-00_009410.1,Ec-00_009420.1,Ec-00_011110.1,Ec-07_007480.1,Ec-18_002770.1
OG0000034	TRUE	prot_D-dichotoma_M_contig793.18756.1	Ec-01_011280.1,Ec-01_011350.1,Ec-01_011390.1,Ec-01_012020.1,Ec-03_000630.1,Ec-06_001020.1,Ec-08_001200.1,Ec-08_001220.1,Ec-08_003350.1,Ec-15_001940.1,Ec-17_000590.1,Ec-25_000110.1,Ec-26_002110.1
OG0000035	FALSE	prot_D-dichotoma_M_contig1168.1377.1,prot_D-dichotoma_M_contig1424.3112.1,prot_D-dichotoma_M_contig2060.6612.1,prot_D-dichotoma_M_contig2848.9825.1,prot_D-dichotoma_M_contig348.11790.1,prot_D-dichotoma_M_contig348.11791.1,prot_D-dichotoma_M_contig3653.12272.1,prot_D-dichotoma_M_contig3814.12668.1,prot_D-dichotoma_M_contig416.13549.1,prot_D-dichotoma_M_contig416.13550.1,prot_D-dichotoma_M_contig41…	NA
OG0000036	FALSE	prot_D-dichotoma_M_contig1109.939.1,prot_D-dichotoma_M_contig1124.1057.1,prot_D-dichotoma_M_contig2243.7518.1,prot_D-dichotoma_M_contig2390.8154.1,prot_D-dichotoma_M_contig2739.9451.1	Ec-06_006950.1,Ec-06_007280.1,Ec-06_007290.1,Ec-06_007360.1,Ec-17_002390.1,Ec-18_000100.1,Ec-21_005470.1,Ec-21_005500.1
OG0000037	FALSE	prot_D-dichotoma_M_contig1740.4992.1,prot_D-dichotoma_M_contig2287.7695.1,prot_D-dichotoma_M_contig2287.7696.1,prot_D-dichotoma_M_contig2287.7697.1	Ec-08_000220.1,Ec-08_000230.1,Ec-08_000840.1,Ec-08_000850.1,Ec-08_001780.1,Ec-08_001790.1,Ec-08_001800.1,Ec-08_001810.1,Ec-08_001820.1
OG0000038	TRUE	prot_D-dichotoma_M_contig774.18601.1	Ec-01_011630.1,Ec-05_004510.1,Ec-06_008980.1,Ec-08_002200.1,Ec-10_005310.1,Ec-10_005380.1,Ec-10_006280.1,Ec-10_006290.1,Ec-11_000110.1,Ec-16_001830.1,Ec-19_001180.1,Ec-27_005470.1
OG0000039	FALSE	NA	Ec-00_004840.1,Ec-00_004920.1,Ec-00_005130.1,Ec-00_007660.1,Ec-00_009700.1,Ec-00_009910.1,Ec-02_001840.1,Ec-05_000180.1,Ec-05_000510.1,Ec-07_005570.1,Ec-17_001780.1,Ec-18_001460.1,Ec-19_000850.1
OG0000040	FALSE	NA	Ec-06_000450.1,Ec-06_000460.1,Ec-06_000470.1,Ec-06_000490.1,Ec-06_000510.1,Ec-06_000520.1,Ec-06_000530.1,Ec-06_000540.1,Ec-06_000550.1,Ec-06_000570.1,Ec-06_000580.1,Ec-06_000710.1,Ec-06_000750.1
OG0000041	TRUE	prot_D-dichotoma_M_contig129.2209.1,prot_D-dichotoma_M_contig129.2212.1,prot_D-dichotoma_M_contig1934.5944.1,prot_D-dichotoma_M_contig1941.5986.1,prot_D-dichotoma_M_contig196.6058.1,prot_D-dichotoma_M_contig2378.8092.1,prot_D-dichotoma_M_contig2542.8745.1,prot_D-dichotoma_M_contig3016.10471.1,prot_D-dichotoma_M_contig3427.11667.1,prot_D-dichotoma_M_contig5969.16822.1,prot_D-dichotoma_M_contig966.…	Ec-11_002560.1
OG0000042	FALSE	prot_D-dichotoma_M_contig1288.2195.1,prot_D-dichotoma_M_contig1400.2992.1,prot_D-dichotoma_M_contig1842.5476.1,prot_D-dichotoma_M_contig2480.8521.1	Ec-00_002650.1,Ec-00_008270.1,Ec-15_005010.1,Ec-22_001520.1,Ec-24_002530.1,Ec-24_002560.1,Ec-26_000550.1,Ec-26_000670.1
OG0000043	FALSE	prot_D-dichotoma_M_contig1721.4902.1,prot_D-dichotoma_M_contig1833.5435.1,prot_D-dichotoma_M_contig3014.10462.1,prot_D-dichotoma_M_contig3014.10463.1,prot_D-dichotoma_M_contig3036.10527.1,prot_D-dichotoma_M_contig3610.12170.1	Ec-00_009000.1,Ec-02_001160.1,Ec-02_001180.1,Ec-02_001200.1,Ec-19_002090.1,Ec-19_002150.1
OG0000044	TRUE	prot_D-dichotoma_M_contig71.18007.1	Ec-05_002110.1,Ec-05_002140.1,Ec-05_002480.1,Ec-05_002490.1,Ec-07_000040.1,Ec-09_001040.1,Ec-09_001960.1,Ec-09_002000.1,Ec-09_002070.1,Ec-17_000750.1,Ec-23_003220.1
OG0000045	FALSE	prot_D-dichotoma_M_contig140.2986.1,prot_D-dichotoma_M_contig1628.4390.1	Ec-01_002800.1,Ec-03_004260.1,Ec-20_004210.1,Ec-20_004370.1,Ec-20_004380.1,Ec-20_004410.1,Ec-20_004420.1,Ec-20_004450.1,Ec-27_001330.1,Ec-27_005590.1
OG0000046	FALSE	prot_D-dichotoma_M_contig1048.473.1,prot_D-dichotoma_M_contig1052.502.1,prot_D-dichotoma_M_contig2149.7104.1,prot_D-dichotoma_M_contig274.9455.1,prot_D-dichotoma_M_contig274.9457.1,prot_D-dichotoma_M_contig299.10314.1,prot_D-dichotoma_M_contig304.10536.1,prot_D-dichotoma_M_contig4889.15042.1	Ec-00_007780.1,Ec-13_003060.1,Ec-13_003170.1,Ec-13_003180.1
OG0000047	FALSE	prot_D-dichotoma_M_contig1138.1151.1,prot_D-dichotoma_M_contig1138.1154.1,prot_D-dichotoma_M_contig1407.3019.1,prot_D-dichotoma_M_contig198.6139.1,prot_D-dichotoma_M_contig198.6140.1,prot_D-dichotoma_M_contig2191.7282.1,prot_D-dichotoma_M_contig444.14159.1,prot_D-dichotoma_M_contig444.14160.1,prot_D-dichotoma_M_contig859.19360.1,prot_D-dichotoma_M_contig859.19362.1	Ec-04_003580.1,Ec-19_002050.1
OG0000048	FALSE	prot_D-dichotoma_M_contig162.4338.1,prot_D-dichotoma_M_contig1842.5475.1,prot_D-dichotoma_M_contig209.6794.1,prot_D-dichotoma_M_contig3201.11071.1,prot_D-dichotoma_M_contig363.12209.1,prot_D-dichotoma_M_contig4198.13621.1,prot_D-dichotoma_M_contig5470.16109.1	Ec-00_010690.1,Ec-00_010720.1,Ec-04_001290.1,Ec-15_001320.1,Ec-24_004220.1
OG0000049	FALSE	prot_D-dichotoma_M_contig2177.7223.1,prot_D-dichotoma_M_contig2542.8746.1,prot_D-dichotoma_M_contig412.13460.1,prot_D-dichotoma_M_contig459.14471.1,prot_D-dichotoma_M_contig459.14472.1,prot_D-dichotoma_M_contig459.14473.1,prot_D-dichotoma_M_contig867.19428.1	Ec-08_000860.1,Ec-08_000900.1,Ec-08_000910.1,Ec-08_000930.1,Ec-08_000940.1
OG0000050	FALSE	prot_D-dichotoma_M_contig1370.2756.1,prot_D-dichotoma_M_contig1754.5055.1,prot_D-dichotoma_M_contig2144.7077.1,prot_D-dichotoma_M_contig3546.11980.1,prot_D-dichotoma_M_contig83.19122.1	Ec-00_008215.1,Ec-00_008240.1,Ec-00_010030.1,Ec-02_000470.1,Ec-05_003380.1,Ec-11_003410.1,Ec-26_000310.1
OG0000051	FALSE	NA	Ec-05_005360.1,Ec-08_000170.1,Ec-08_000990.1,Ec-08_001140.1,Ec-08_001440.1,Ec-11_000430.1,Ec-11_002260.1,Ec-11_005790.1,Ec-19_004420.1,Ec-19_004490.1,Ec-23_003980.1,Ec-25_000420.1
OG0000052	TRUE	prot_D-dichotoma_M_contig1675.4639.1,prot_D-dichotoma_M_contig1675.4640.1,prot_D-dichotoma_M_contig169.4701.1,prot_D-dichotoma_M_contig1695.4737.1,prot_D-dichotoma_M_contig2682.9258.1,prot_D-dichotoma_M_contig2834.9795.1,prot_D-dichotoma_M_contig2850.9838.1,prot_D-dichotoma_M_contig31.10713.1,prot_D-dichotoma_M_contig3172.10949.1,prot_D-dichotoma_M_contig696.17831.1	Ec-00_007580.1
OG0000053	FALSE	prot_D-dichotoma_M_contig1013.200.1,prot_D-dichotoma_M_contig1853.5529.1,prot_D-dichotoma_M_contig1853.5530.1,prot_D-dichotoma_M_contig2184.7254.1,prot_D-dichotoma_M_contig2184.7257.1,prot_D-dichotoma_M_contig846.19260.1,prot_D-dichotoma_M_contig846.19261.1,prot_D-dichotoma_M_contig846.19262.1,prot_D-dichotoma_M_contig846.19264.1,prot_D-dichotoma_M_contig846.19265.1,prot_D-dichotoma_M_contig846.1…	NA
OG0000054	TRUE	prot_D-dichotoma_M_contig1537.3791.1,prot_D-dichotoma_M_contig1537.3792.1,prot_D-dichotoma_M_contig17.4758.1,prot_D-dichotoma_M_contig2853.9844.1,prot_D-dichotoma_M_contig3432.11678.1,prot_D-dichotoma_M_contig3432.11679.1,prot_D-dichotoma_M_contig4035.13247.1,prot_D-dichotoma_M_contig423.13728.1,prot_D-dichotoma_M_contig794.18759.1,prot_D-dichotoma_M_contig920.19946.1	Ec-24_004240.1
OG0000055	TRUE	prot_D-dichotoma_M_contig1177.1438.1,prot_D-dichotoma_M_contig1665.4592.1,prot_D-dichotoma_M_contig2138.7042.1,prot_D-dichotoma_M_contig2710.9375.1,prot_D-dichotoma_M_contig2821.9761.1,prot_D-dichotoma_M_contig3103.10754.1,prot_D-dichotoma_M_contig45.14261.1,prot_D-dichotoma_M_contig476.14804.1,prot_D-dichotoma_M_contig4764.14809.1,prot_D-dichotoma_M_contig4878.15028.1	Ec-13_000020.1
OG0000056	FALSE	prot_D-dichotoma_M_contig1321.2482.1,prot_D-dichotoma_M_contig1321.2485.1,prot_D-dichotoma_M_contig2248.7529.1,prot_D-dichotoma_M_contig2794.9643.1,prot_D-dichotoma_M_contig92.19943.1,prot_D-dichotoma_M_contig938.20103.1,prot_D-dichotoma_M_contig938.20105.1,prot_D-dichotoma_M_contig938.20107.1,prot_D-dichotoma_M_contig980.20469.1	Ec-18_004560.1,Ec-18_004580.1
OG0000057	FALSE	prot_D-dichotoma_M_contig118.1453.1,prot_D-dichotoma_M_contig2153.7135.1,prot_D-dichotoma_M_contig678.17673.1,prot_D-dichotoma_M_contig678.17674.1	Ec-11_002650.1,Ec-11_002830.1,Ec-11_002840.1,Ec-11_002850.1,Ec-19_003530.1,Ec-19_003540.1,Ec-19_003550.1
OG0000058	FALSE	prot_D-dichotoma_M_contig1916.5856.1,prot_D-dichotoma_M_contig2938.10157.1,prot_D-dichotoma_M_contig4217.13693.1	Ec-03_000740.1,Ec-10_002030.1,Ec-10_002050.1,Ec-10_003070.1,Ec-11_002410.1,Ec-11_006310.1,Ec-22_002160.1,Ec-26_006670.1
OG0000059	FALSE	prot_D-dichotoma_M_contig1940.5983.1,prot_D-dichotoma_M_contig488.15033.1,prot_D-dichotoma_M_contig734.18198.1,prot_D-dichotoma_M_contig734.18200.1	Ec-05_002340.1,Ec-05_002350.1,Ec-08_004090.1,Ec-08_006050.1,Ec-08_006240.1,Ec-27_001150.1,Ec-27_001160.1
OG0000060	TRUE	prot_D-dichotoma_M_contig448.14214.1	Ec-00_002440.1,Ec-00_007370.1,Ec-00_007380.1,Ec-00_008300.1,Ec-00_008620.1,Ec-00_008630.1,Ec-00_009050.1,Ec-21_002420.1,Ec-21_002650.1,Ec-21_003930.1
OG0000061	FALSE	prot_D-dichotoma_M_contig1141.1185.1,prot_D-dichotoma_M_contig1219.1757.1,prot_D-dichotoma_M_contig1320.2479.1,prot_D-dichotoma_M_contig2570.8843.1,prot_D-dichotoma_M_contig33.11341.1,prot_D-dichotoma_M_contig416.13564.1,prot_D-dichotoma_M_contig5250.15752.1	Ec-02_002070.1,Ec-18_002620.1,Ec-24_002520.1
OG0000062	FALSE	prot_D-dichotoma_M_contig1112.962.1,prot_D-dichotoma_M_contig1112.963.1,prot_D-dichotoma_M_contig1870.5621.1,prot_D-dichotoma_M_contig1877.5638.1,prot_D-dichotoma_M_contig1904.5789.1,prot_D-dichotoma_M_contig1951.6020.1,prot_D-dichotoma_M_contig2093.6807.1,prot_D-dichotoma_M_contig54.16010.1,prot_D-dichotoma_M_contig54.16013.1,prot_D-dichotoma_M_contig930.20051.1	NA
OG0000063	FALSE	prot_D-dichotoma_M_contig1323.2493.1,prot_D-dichotoma_M_contig2313.7837.1,prot_D-dichotoma_M_contig3040.10543.1,prot_D-dichotoma_M_contig783.18667.1	Ec-03_002500.1,Ec-03_002560.1,Ec-24_003270.1,Ec-24_003300.1,Ec-24_003380.1,Ec-24_003400.1
OG0000064	TRUE	prot_D-dichotoma_M_contig1495.3543.1	Ec-12_002690.1,Ec-12_002700.1,Ec-12_002710.1,Ec-12_002740.1,Ec-12_002760.1,Ec-12_002860.1,Ec-12_002880.1,Ec-12_002890.1,Ec-12_002910.1
OG0000065	FALSE	prot_D-dichotoma_M_contig1626.4374.1,prot_D-dichotoma_M_contig1626.4375.1,prot_D-dichotoma_M_contig1626.4376.1,prot_D-dichotoma_M_contig1626.4377.1,prot_D-dichotoma_M_contig853.19326.1	Ec-04_000980.1,Ec-05_004110.1,Ec-08_000140.1,Ec-09_004430.1,Ec-11_001810.1
OG0000066	FALSE	prot_D-dichotoma_M_contig1603.4223.1,prot_D-dichotoma_M_contig1603.4224.1,prot_D-dichotoma_M_contig3199.11023.1,prot_D-dichotoma_M_contig3877.12825.1,prot_D-dichotoma_M_contig4426.14127.1,prot_D-dichotoma_M_contig4426.14129.1,prot_D-dichotoma_M_contig929.20035.1	Ec-06_008510.1,Ec-07_000190.1,Ec-26_000780.1
OG0000067	FALSE	prot_D-dichotoma_M_contig1579.4014.1,prot_D-dichotoma_M_contig1579.4015.1,prot_D-dichotoma_M_contig2680.9248.1,prot_D-dichotoma_M_contig372.12457.1,prot_D-dichotoma_M_contig372.12458.1,prot_D-dichotoma_M_contig372.12460.1	Ec-07_005440.1,Ec-24_003960.1,Ec-24_003990.1,Ec-25_001120.1
OG0000068	FALSE	prot_D-dichotoma_M_contig1255.1989.1,prot_D-dichotoma_M_contig765.18508.1,prot_D-dichotoma_M_contig765.18509.1,prot_D-dichotoma_M_contig765.18510.1	Ec-00_008940.1,Ec-05_006600.1,Ec-05_006610.1,Ec-08_003990.1,Ec-20_002730.1,Ec-20_002770.1
OG0000069	TRUE	prot_D-dichotoma_M_contig324.11176.1	Ec-11_003380.1,Ec-11_003390.1,Ec-11_003400.1,Ec-11_003420.1,Ec-11_003430.1,Ec-11_003450.1,Ec-11_003470.1,Ec-11_003510.1,Ec-20_003190.1
OG0000070	TRUE	prot_D-dichotoma_M_contig456.14415.1	Ec-08_006400.1,Ec-08_006430.1,Ec-08_006470.1,Ec-08_006500.1,Ec-08_006510.1,Ec-08_006570.1,Ec-08_006590.1,Ec-13_004720.1,Ec-13_004730.1
OG0000071	FALSE	prot_D-dichotoma_M_contig1592.4108.1,prot_D-dichotoma_M_contig1592.4109.1,prot_D-dichotoma_M_contig3024.10502.1,prot_D-dichotoma_M_contig3024.10503.1,prot_D-dichotoma_M_contig3024.10504.1,prot_D-dichotoma_M_contig3024.10505.1,prot_D-dichotoma_M_contig4576.14448.1,prot_D-dichotoma_M_contig458.14453.1,prot_D-dichotoma_M_contig458.14459.1,prot_D-dichotoma_M_contig458.14460.1	NA
OG0000072	FALSE	prot_D-dichotoma_M_contig1013.209.1,prot_D-dichotoma_M_contig1613.4287.1,prot_D-dichotoma_M_contig1613.4290.1	Ec-00_008360.1,Ec-00_008370.1,Ec-00_008380.1,Ec-00_008870.1,Ec-00_008890.1,Ec-13_002360.1,Ec-13_002370.1
OG0000073	FALSE	prot_D-dichotoma_M_contig2182.7250.1,prot_D-dichotoma_M_contig2895.9991.1,prot_D-dichotoma_M_contig54.15999.1,prot_D-dichotoma_M_contig912.19866.1,prot_D-dichotoma_M_contig912.19867.1	Ec-07_005510.1,Ec-07_007660.1,Ec-07_007690.1,Ec-07_007760.1,Ec-08_005080.1
OG0000074	TRUE	prot_D-dichotoma_M_contig815.18989.1	Ec-02_003860.1,Ec-04_000110.1,Ec-04_000820.1,Ec-10_006420.1,Ec-11_001715.1,Ec-13_000200.1,Ec-21_000180.1,Ec-23_004240.1,Ec-26_000040.1
OG0000075	TRUE	prot_D-dichotoma_M_contig1507.3631.1,prot_D-dichotoma_M_contig1673.4632.1,prot_D-dichotoma_M_contig1838.5451.1,prot_D-dichotoma_M_contig2356.8002.1,prot_D-dichotoma_M_contig2410.8262.1,prot_D-dichotoma_M_contig3807.12650.1,prot_D-dichotoma_M_contig396.13022.1,prot_D-dichotoma_M_contig396.13026.1	Ec-11_006290.1
OG0000076	TRUE	prot_D-dichotoma_M_contig2537.8728.1,prot_D-dichotoma_M_contig2548.8761.1,prot_D-dichotoma_M_contig2548.8762.1,prot_D-dichotoma_M_contig3682.12338.1,prot_D-dichotoma_M_contig3682.12339.1,prot_D-dichotoma_M_contig5252.15754.1,prot_D-dichotoma_M_contig5316.15867.1,prot_D-dichotoma_M_contig5832.16681.1	Ec-15_001920.1
OG0000077	FALSE	prot_D-dichotoma_M_contig216.7155.1,prot_D-dichotoma_M_contig383.12702.1,prot_D-dichotoma_M_contig985.20495.1	Ec-04_005710.1,Ec-07_001460.1,Ec-07_001540.1,Ec-09_000630.1,Ec-14_001160.1,Ec-18_003350.1
OG0000078	TRUE	prot_D-dichotoma_M_contig1117.991.1	Ec-00_009390.1,Ec-06_008720.1,Ec-09_004230.1,Ec-09_004260.1,Ec-09_004570.1,Ec-20_001980.1,Ec-21_001490.1,Ec-21_003160.1
OG0000079	FALSE	prot_D-dichotoma_M_contig1119.1016.1,prot_D-dichotoma_M_contig1668.4602.1,prot_D-dichotoma_M_contig2722.9407.1,prot_D-dichotoma_M_contig3739.12494.1,prot_D-dichotoma_M_contig535.15921.1,prot_D-dichotoma_M_contig535.15923.1,prot_D-dichotoma_M_contig750.18347.1	Ec-04_000730.1,Ec-04_000780.1
OG0000080	FALSE	prot_D-dichotoma_M_contig1162.1345.1,prot_D-dichotoma_M_contig182.5383.1,prot_D-dichotoma_M_contig182.5386.1,prot_D-dichotoma_M_contig215.7114.1,prot_D-dichotoma_M_contig227.7610.1,prot_D-dichotoma_M_contig227.7613.1	Ec-05_002510.1,Ec-07_000460.1,Ec-07_000490.1
OG0000081	TRUE	prot_D-dichotoma_M_contig1507.3632.1,prot_D-dichotoma_M_contig1507.3633.1,prot_D-dichotoma_M_contig1558.3906.1,prot_D-dichotoma_M_contig2395.8165.1,prot_D-dichotoma_M_contig3686.12358.1,prot_D-dichotoma_M_contig3873.12819.1,prot_D-dichotoma_M_contig551.16180.1,prot_D-dichotoma_M_contig595.16806.1	Ec-06_003040.1
OG0000082	FALSE	prot_D-dichotoma_M_contig1304.2362.1,prot_D-dichotoma_M_contig1313.2434.1,prot_D-dichotoma_M_contig1725.4915.1,prot_D-dichotoma_M_contig178.5164.1,prot_D-dichotoma_M_contig178.5165.1,prot_D-dichotoma_M_contig178.5166.1,prot_D-dichotoma_M_contig330.11360.1,prot_D-dichotoma_M_contig330.11364.1,prot_D-dichotoma_M_contig4203.13669.1	NA
OG0000083	FALSE	prot_D-dichotoma_M_contig1024.299.1,prot_D-dichotoma_M_contig1045.463.1,prot_D-dichotoma_M_contig18.5273.1,prot_D-dichotoma_M_contig4285.13831.1,prot_D-dichotoma_M_contig562.16381.1	Ec-00_006460.1,Ec-00_009720.1,Ec-12_006115.1,Ec-17_002040.1
OG0000084	FALSE	prot_D-dichotoma_M_contig1885.5684.1,prot_D-dichotoma_M_contig2989.10312.1,prot_D-dichotoma_M_contig805.18902.1,prot_D-dichotoma_M_contig805.18903.1,prot_D-dichotoma_M_contig805.18904.1,prot_D-dichotoma_M_contig805.18905.1,prot_D-dichotoma_M_contig805.18906.1,prot_D-dichotoma_M_contig805.18908.1,prot_D-dichotoma_M_contig805.18909.1	NA
OG0000085	FALSE	prot_D-dichotoma_M_contig2048.6546.1,prot_D-dichotoma_M_contig2631.9068.1,prot_D-dichotoma_M_contig366.12280.1,prot_D-dichotoma_M_contig366.12281.1	Ec-01_006220.1,Ec-01_006250.1,Ec-02_004700.1,Ec-17_000940.1,Ec-19_005420.1
OG0000086	FALSE	NA	Ec-05_003280.1,Ec-05_003440.1,Ec-05_003530.1,Ec-05_003540.1,Ec-05_005670.1,Ec-07_000660.1,Ec-16_001610.1,Ec-17_004240.1,Ec-17_004250.1
OG0000087	FALSE	prot_D-dichotoma_M_contig1416.3065.1,prot_D-dichotoma_M_contig1935.5951.1,prot_D-dichotoma_M_contig248.8509.1,prot_D-dichotoma_M_contig3620.12194.1,prot_D-dichotoma_M_contig3758.12535.1,prot_D-dichotoma_M_contig4301.13892.1	Ec-00_003770.1,Ec-00_005280.1
OG0000088	TRUE	prot_D-dichotoma_M_contig2292.7729.1,prot_D-dichotoma_M_contig4442.14161.1,prot_D-dichotoma_M_contig525.15747.1,prot_D-dichotoma_M_contig525.15748.1,prot_D-dichotoma_M_contig525.15751.1,prot_D-dichotoma_M_contig924.19978.1,prot_D-dichotoma_M_contig924.19980.1	Ec-08_004880.1
OG0000089	TRUE	prot_D-dichotoma_M_contig477.14819.1	Ec-00_003820.1,Ec-01_001200.1,Ec-01_009260.1,Ec-03_004100.1,Ec-05_006010.1,Ec-19_003990.1,Ec-21_003390.1
OG0000090	FALSE	prot_D-dichotoma_M_contig1121.1041.1,prot_D-dichotoma_M_contig1121.1042.1,prot_D-dichotoma_M_contig1641.4461.1,prot_D-dichotoma_M_contig1641.4463.1,prot_D-dichotoma_M_contig291.10064.1,prot_D-dichotoma_M_contig291.10065.1,prot_D-dichotoma_M_contig3103.10753.1,prot_D-dichotoma_M_contig827.19067.1	NA
OG0000091	FALSE	prot_D-dichotoma_M_contig1620.4344.1,prot_D-dichotoma_M_contig1640.4460.1,prot_D-dichotoma_M_contig1642.4469.1,prot_D-dichotoma_M_contig1649.4495.1,prot_D-dichotoma_M_contig1778.5155.1,prot_D-dichotoma_M_contig2310.7831.1,prot_D-dichotoma_M_contig2852.9843.1,prot_D-dichotoma_M_contig792.18744.1	NA
OG0000092	FALSE	prot_D-dichotoma_M_contig1607.4239.1,prot_D-dichotoma_M_contig3218.11116.1,prot_D-dichotoma_M_contig560.16345.1,prot_D-dichotoma_M_contig560.16346.1,prot_D-dichotoma_M_contig560.16347.1	Ec-14_002990.1,Ec-14_003000.1,Ec-14_003030.1
OG0000093	TRUE	prot_D-dichotoma_M_contig1817.5375.1,prot_D-dichotoma_M_contig2699.9295.1,prot_D-dichotoma_M_contig27.9307.1,prot_D-dichotoma_M_contig27.9309.1,prot_D-dichotoma_M_contig2725.9420.1,prot_D-dichotoma_M_contig2990.10327.1,prot_D-dichotoma_M_contig961.20329.1	Ec-03_003830.1
OG0000094	TRUE	prot_D-dichotoma_M_contig1369.2739.1,prot_D-dichotoma_M_contig2717.9389.1,prot_D-dichotoma_M_contig292.10110.1,prot_D-dichotoma_M_contig354.11969.1,prot_D-dichotoma_M_contig548.16135.1,prot_D-dichotoma_M_contig5553.16253.1,prot_D-dichotoma_M_contig969.20375.1	Ec-05_001160.1
OG0000095	FALSE	prot_D-dichotoma_M_contig185.5516.1,prot_D-dichotoma_M_contig363.12211.1,prot_D-dichotoma_M_contig481.14906.1,prot_D-dichotoma_M_contig481.14908.1,prot_D-dichotoma_M_contig679.17681.1	Ec-00_004000.1,Ec-01_011430.1,Ec-01_011450.1
OG0000096	FALSE	prot_D-dichotoma_M_contig1765.5095.1,prot_D-dichotoma_M_contig2711.9380.1,prot_D-dichotoma_M_contig3593.12098.1,prot_D-dichotoma_M_contig4338.13960.1,prot_D-dichotoma_M_contig5376.15954.1,prot_D-dichotoma_M_contig902.19787.1	Ec-00_005820.1,Ec-00_005850.1
OG0000097	TRUE	prot_D-dichotoma_M_contig1942.5990.1,prot_D-dichotoma_M_contig2115.6935.1,prot_D-dichotoma_M_contig2859.9851.1,prot_D-dichotoma_M_contig4557.14409.1,prot_D-dichotoma_M_contig4660.14606.1,prot_D-dichotoma_M_contig965.20357.1,prot_D-dichotoma_M_contig994.20554.1	Ec-28_003320.1
OG0000098	FALSE	prot_D-dichotoma_M_contig1432.3162.1,prot_D-dichotoma_M_contig1432.3163.1,prot_D-dichotoma_M_contig2073.6674.1	Ec-00_006280.1,Ec-15_000980.1,Ec-15_001000.1,Ec-15_001030.1,Ec-17_000220.1
OG0000099	TRUE	prot_D-dichotoma_M_contig227.7624.1	Ec-00_005460.1,Ec-04_005020.1,Ec-07_000510.1,Ec-26_005850.1,Ec-26_005910.1,Ec-26_006360.1,Ec-26_006460.1
OG0000100	FALSE	NA	Ec-00_003670.1,Ec-00_003840.1,Ec-05_000170.1,Ec-05_000620.1,Ec-05_003270.1,Ec-10_000020.1,Ec-11_001400.1,Ec-21_000790.1
OG0000101	FALSE	NA	Ec-14_001210.1,Ec-14_001620.1,Ec-23_002210.1,Ec-24_000230.1,Ec-24_000240.1,Ec-24_000270.1,Ec-24_000280.1,Ec-24_000410.1
OG0000102	FALSE	prot_D-dichotoma_M_contig1178.1439.1,prot_D-dichotoma_M_contig1178.1440.1,prot_D-dichotoma_M_contig1178.1441.1,prot_D-dichotoma_M_contig3492.11844.1,prot_D-dichotoma_M_contig4400.14090.1	Ec-12_001610.1,Ec-12_001620.1
OG0000103	FALSE	prot_D-dichotoma_M_contig183.5424.1,prot_D-dichotoma_M_contig183.5425.1,prot_D-dichotoma_M_contig183.5427.1,prot_D-dichotoma_M_contig2299.7748.1	Ec-02_004680.1,Ec-06_003430.1,Ec-28_000190.1
OG0000104	FALSE	prot_D-dichotoma_M_contig1597.4139.1,prot_D-dichotoma_M_contig2492.8556.1,prot_D-dichotoma_M_contig720.18103.1,prot_D-dichotoma_M_contig743.18277.1	Ec-07_000580.1,Ec-07_000650.1,Ec-07_000670.1
OG0000105	FALSE	prot_D-dichotoma_M_contig1088.750.1,prot_D-dichotoma_M_contig1424.3117.1,prot_D-dichotoma_M_contig1424.3119.1,prot_D-dichotoma_M_contig2942.10169.1,prot_D-dichotoma_M_contig3068.10615.1	Ec-06_008030.1,Ec-13_000340.1
OG0000106	FALSE	prot_D-dichotoma_M_contig1918.5859.1,prot_D-dichotoma_M_contig2849.9826.1,prot_D-dichotoma_M_contig851.19308.1,prot_D-dichotoma_M_contig851.19310.1	Ec-22_002210.1,Ec-22_002220.1,Ec-22_003140.1
OG0000107	FALSE	prot_D-dichotoma_M_contig1444.3258.1,prot_D-dichotoma_M_contig2225.7431.1,prot_D-dichotoma_M_contig2255.7556.1,prot_D-dichotoma_M_contig2409.8248.1,prot_D-dichotoma_M_contig3334.11444.1	Ec-07_001210.1,Ec-07_002560.1
OG0000108	FALSE	prot_D-dichotoma_M_contig154.3814.1,prot_D-dichotoma_M_contig168.4649.1,prot_D-dichotoma_M_contig1849.5504.1	Ec-21_000810.1,Ec-21_000930.1,Ec-21_003360.1,Ec-27_007040.1
OG0000109	FALSE	prot_D-dichotoma_M_contig1374.2767.1,prot_D-dichotoma_M_contig4903.15104.1,prot_D-dichotoma_M_contig5587.16300.1,prot_D-dichotoma_M_contig689.17761.1,prot_D-dichotoma_M_contig829.19086.1	Ec-05_000010.1,Ec-05_000360.1
OG0000110	FALSE	prot_D-dichotoma_M_contig4307.13897.1,prot_D-dichotoma_M_contig798.18804.1	Ec-12_000400.1,Ec-12_000460.1,Ec-12_000470.1,Ec-12_000480.1,Ec-12_000490.1
OG0000111	FALSE	prot_D-dichotoma_M_contig4249.13757.1,prot_D-dichotoma_M_contig441.14101.1	Ec-00_008070.1,Ec-10_003100.1,Ec-24_003810.1,Ec-24_003860.1,Ec-24_003880.1
OG0000112	FALSE	prot_D-dichotoma_M_contig1346.2615.1,prot_D-dichotoma_M_contig2193.7287.1,prot_D-dichotoma_M_contig740.18255.1	Ec-07_000270.1,Ec-07_000280.1,Ec-07_000300.1,Ec-11_001600.1
OG0000113	FALSE	prot_D-dichotoma_M_contig1352.2659.1,prot_D-dichotoma_M_contig3768.12549.1,prot_D-dichotoma_M_contig3963.13030.1	Ec-11_005310.1,Ec-15_003140.1,Ec-24_002330.1,Ec-24_002370.1
OG0000114	TRUE	prot_D-dichotoma_M_contig1592.4110.1,prot_D-dichotoma_M_contig2239.7491.1,prot_D-dichotoma_M_contig2239.7492.1,prot_D-dichotoma_M_contig551.16176.1,prot_D-dichotoma_M_contig551.16177.1,prot_D-dichotoma_M_contig551.16181.1	Ec-06_003230.1
OG0000115	FALSE	prot_D-dichotoma_M_contig1663.4586.1,prot_D-dichotoma_M_contig1663.4587.1,prot_D-dichotoma_M_contig1663.4588.1,prot_D-dichotoma_M_contig4077.13350.1,prot_D-dichotoma_M_contig427.13810.1	Ec-00_005610.1,Ec-18_000010.1
OG0000116	FALSE	prot_D-dichotoma_M_contig1667.4601.1,prot_D-dichotoma_M_contig2966.10243.1,prot_D-dichotoma_M_contig2966.10244.1	Ec-03_000010.1,Ec-03_000020.1,Ec-20_003620.1,Ec-20_003630.1
OG0000117	FALSE	prot_D-dichotoma_M_contig1207.1671.1,prot_D-dichotoma_M_contig1880.5664.1,prot_D-dichotoma_M_contig3089.10679.1,prot_D-dichotoma_M_contig3210.11097.1	Ec-11_001210.1,Ec-13_002080.1,Ec-23_002360.1
OG0000118	FALSE	prot_D-dichotoma_M_contig1865.5583.1,prot_D-dichotoma_M_contig411.13442.1	Ec-03_000370.1,Ec-05_000090.1,Ec-05_000480.1,Ec-05_000770.1,Ec-23_003800.1
OG0000119	FALSE	prot_D-dichotoma_M_contig244.8360.1,prot_D-dichotoma_M_contig244.8362.1	Ec-00_009850.1,Ec-05_003200.1,Ec-21_002110.1,Ec-21_002280.1,Ec-28_001900.1
OG0000120	TRUE	prot_D-dichotoma_M_contig3740.12501.1	Ec-00_000870.1,Ec-03_000500.1,Ec-03_000520.1,Ec-08_000110.1,Ec-08_006060.1,Ec-21_000940.1
OG0000121	TRUE	prot_D-dichotoma_M_contig2063.6625.1	Ec-00_005000.1,Ec-00_005810.1,Ec-05_000570.1,Ec-11_003490.1,Ec-14_000450.1,Ec-20_004840.1
OG0000122	TRUE	prot_D-dichotoma_M_contig2810.9721.1	Ec-04_000200.1,Ec-04_000210.1,Ec-04_000220.1,Ec-10_002350.1,Ec-10_002360.1,Ec-11_000420.1
OG0000123	TRUE	prot_D-dichotoma_M_contig1162.1348.1	Ec-00_005470.1,Ec-07_000520.1,Ec-26_005860.1,Ec-26_005900.1,Ec-26_006370.1,Ec-26_006450.1
OG0000124	FALSE	prot_D-dichotoma_M_contig1589.4075.1,prot_D-dichotoma_M_contig644.17388.1	Ec-10_004600.1,Ec-10_004640.1,Ec-24_001090.1,Ec-24_001100.1,Ec-24_001110.1
OG0000125	TRUE	prot_D-dichotoma_M_contig1208.1680.1,prot_D-dichotoma_M_contig2006.6350.1,prot_D-dichotoma_M_contig2072.6665.1,prot_D-dichotoma_M_contig55.16163.1,prot_D-dichotoma_M_contig728.18164.1	Ec-06_001770.1
OG0000126	TRUE	prot_D-dichotoma_M_contig1204.1651.1,prot_D-dichotoma_M_contig135.2642.1,prot_D-dichotoma_M_contig2669.9194.1,prot_D-dichotoma_M_contig356.12013.1,prot_D-dichotoma_M_contig460.14515.1	Ec-03_003300.1
OG0000127	FALSE	prot_D-dichotoma_M_contig1073.649.1,prot_D-dichotoma_M_contig1229.1811.1,prot_D-dichotoma_M_contig1229.1812.1	Ec-05_002710.1,Ec-05_002720.1,Ec-05_002910.1
OG0000128	FALSE	prot_D-dichotoma_M_contig1172.1405.1,prot_D-dichotoma_M_contig1532.3776.1	Ec-08_006330.1,Ec-23_004220.1,Ec-26_001130.1,Ec-26_001450.1
OG0000129	TRUE	prot_D-dichotoma_M_contig14.2962.1,prot_D-dichotoma_M_contig2472.8487.1,prot_D-dichotoma_M_contig3194.11014.1,prot_D-dichotoma_M_contig3194.11015.1,prot_D-dichotoma_M_contig754.18390.1	Ec-27_005680.1
OG0000130	TRUE	prot_D-dichotoma_M_contig1141.1184.1	Ec-00_001800.1,Ec-00_001810.1,Ec-00_001850.1,Ec-00_001860.1,Ec-00_010390.1
OG0000131	TRUE	prot_D-dichotoma_M_contig1143.1196.1,prot_D-dichotoma_M_contig2205.7365.1,prot_D-dichotoma_M_contig228.7662.1,prot_D-dichotoma_M_contig2831.9786.1,prot_D-dichotoma_M_contig3508.11898.1	Ec-04_003210.1
OG0000132	TRUE	prot_D-dichotoma_M_contig2485.8531.1,prot_D-dichotoma_M_contig298.10295.1,prot_D-dichotoma_M_contig3488.11824.1,prot_D-dichotoma_M_contig4532.14367.1,prot_D-dichotoma_M_contig4543.14397.1	Ec-17_002120.1
OG0000133	TRUE	prot_D-dichotoma_M_contig2407.8233.1,prot_D-dichotoma_M_contig2407.8234.1,prot_D-dichotoma_M_contig566.16413.1,prot_D-dichotoma_M_contig566.16414.1,prot_D-dichotoma_M_contig566.16415.1	Ec-06_007020.1
OG0000134	FALSE	prot_D-dichotoma_M_contig2271.7637.1,prot_D-dichotoma_M_contig252.8677.1,prot_D-dichotoma_M_contig2533.8716.1,prot_D-dichotoma_M_contig683.17709.1	Ec-00_007099.1,Ec-19_003010.1
OG0000135	FALSE	prot_D-dichotoma_M_contig3067.10613.1,prot_D-dichotoma_M_contig4804.14898.1	Ec-19_003650.1,Ec-19_003690.1,Ec-19_004090.1,Ec-19_004120.1
OG0000136	TRUE	prot_D-dichotoma_M_contig1084.718.1,prot_D-dichotoma_M_contig12.1610.1,prot_D-dichotoma_M_contig2981.10303.1,prot_D-dichotoma_M_contig3911.12931.1,prot_D-dichotoma_M_contig4288.13837.1	Ec-16_002930.1
OG0000137	FALSE	prot_D-dichotoma_M_contig1516.3674.1,prot_D-dichotoma_M_contig626.17162.1	Ec-00_006570.1,Ec-26_002660.1,Ec-26_003200.1,Ec-26_005190.1
OG0000138	TRUE	prot_D-dichotoma_M_contig3030.10519.1,prot_D-dichotoma_M_contig3403.11606.1,prot_D-dichotoma_M_contig4606.14523.1,prot_D-dichotoma_M_contig5318.15869.1,prot_D-dichotoma_M_contig969.20378.1	Ec-24_000710.1
OG0000139	TRUE	prot_D-dichotoma_M_contig1355.2670.1	Ec-00_005250.1,Ec-02_004900.1,Ec-17_000500.1,Ec-18_000050.1,Ec-18_000060.1
OG0000140	FALSE	prot_D-dichotoma_M_contig188.5648.1,prot_D-dichotoma_M_contig2281.7672.1,prot_D-dichotoma_M_contig298.10294.1	Ec-17_003200.1,Ec-17_003870.1,Ec-26_005310.1
OG0000141	TRUE	prot_D-dichotoma_M_contig118.1449.1	Ec-00_000630.1,Ec-00_002970.1,Ec-00_010110.1,Ec-06_008640.1,Ec-06_009070.1
OG0000142	FALSE	prot_D-dichotoma_M_contig1376.2777.1,prot_D-dichotoma_M_contig3742.12504.1	Ec-19_004130.1,Ec-19_004150.1,Ec-19_004170.1,Ec-19_004180.1
OG0000143	FALSE	prot_D-dichotoma_M_contig1216.1742.1,prot_D-dichotoma_M_contig129.2206.1	Ec-07_007110.1,Ec-07_007130.1,Ec-28_000600.1,Ec-28_000610.1
OG0000144	FALSE	prot_D-dichotoma_M_contig34.11576.1,prot_D-dichotoma_M_contig34.11577.1,prot_D-dichotoma_M_contig34.11578.1,prot_D-dichotoma_M_contig4504.14310.1	Ec-15_004110.1,Ec-15_004120.1
OG0000145	TRUE	prot_D-dichotoma_M_contig2238.7487.1	Ec-14_001050.1,Ec-17_003510.1,Ec-17_003560.1,Ec-24_004270.1,Ec-27_000410.1
OG0000146	TRUE	prot_D-dichotoma_M_contig2243.7517.1	Ec-00_006430.1,Ec-03_000180.1,Ec-05_006320.1,Ec-17_000850.1,Ec-18_000160.1
OG0000147	TRUE	prot_D-dichotoma_M_contig1159.1296.1,prot_D-dichotoma_M_contig1430.3152.1,prot_D-dichotoma_M_contig195.6009.1,prot_D-dichotoma_M_contig2436.8353.1,prot_D-dichotoma_M_contig553.16202.1	Ec-06_003180.1
OG0000148	FALSE	prot_D-dichotoma_M_contig35.11864.1,prot_D-dichotoma_M_contig35.11866.1,prot_D-dichotoma_M_contig37.12400.1	Ec-11_004630.1,Ec-12_008450.1,Ec-13_000430.1
OG0000149	FALSE	prot_D-dichotoma_M_contig2411.8267.1,prot_D-dichotoma_M_contig440.14084.1,prot_D-dichotoma_M_contig4924.15138.1	Ec-01_002430.1,Ec-08_000960.1,Ec-08_000970.1
OG0000150	TRUE	prot_D-dichotoma_M_contig1479.3432.1,prot_D-dichotoma_M_contig1479.3433.1,prot_D-dichotoma_M_contig507.15441.1,prot_D-dichotoma_M_contig507.15442.1,prot_D-dichotoma_M_contig5483.16143.1	Ec-21_004110.1
OG0000151	TRUE	prot_D-dichotoma_M_contig179.5207.1	Ec-00_004760.1,Ec-05_000730.1,Ec-13_004080.1,Ec-23_001550.1,Ec-23_002150.1
OG0000152	FALSE	prot_D-dichotoma_M_contig1171.1403.1,prot_D-dichotoma_M_contig1831.5432.1,prot_D-dichotoma_M_contig3109.10769.1,prot_D-dichotoma_M_contig3463.11773.1,prot_D-dichotoma_M_contig831.19126.1,prot_D-dichotoma_M_contig831.19132.1	NA
OG0000153	TRUE	prot_D-dichotoma_M_contig38.12630.1,prot_D-dichotoma_M_contig38.12632.1,prot_D-dichotoma_M_contig413.13497.1,prot_D-dichotoma_M_contig413.13500.1,prot_D-dichotoma_M_contig639.17336.1	Ec-00_008670.1
OG0000154	TRUE	prot_D-dichotoma_M_contig1278.2135.1	Ec-00_004090.1,Ec-00_006920.1,Ec-00_008160.1,Ec-00_009980.1,Ec-00_010180.1
OG0000155	FALSE	prot_D-dichotoma_M_contig1011.188.1,prot_D-dichotoma_M_contig3455.11743.1	Ec-01_001530.1,Ec-02_000560.1,Ec-11_004700.1
OG0000156	FALSE	prot_D-dichotoma_M_contig1569.3974.1,prot_D-dichotoma_M_contig2440.8370.1,prot_D-dichotoma_M_contig890.19671.1	Ec-27_006130.1,Ec-28_000810.1
OG0000157	TRUE	prot_D-dichotoma_M_contig162.4330.1	Ec-04_000500.1,Ec-08_004760.1,Ec-09_000730.1,Ec-25_000880.1
OG0000158	FALSE	prot_D-dichotoma_M_contig219.7278.1,prot_D-dichotoma_M_contig2778.9567.1,prot_D-dichotoma_M_contig3406.11615.1,prot_D-dichotoma_M_contig557.16281.1,prot_D-dichotoma_M_contig666.17585.1	NA
OG0000159	TRUE	prot_D-dichotoma_M_contig3700.12422.1,prot_D-dichotoma_M_contig4936.15157.1,prot_D-dichotoma_M_contig863.19407.1,prot_D-dichotoma_M_contig98.20449.1	Ec-05_003430.1
OG0000160	TRUE	prot_D-dichotoma_M_contig1408.3021.1,prot_D-dichotoma_M_contig3682.12343.1,prot_D-dichotoma_M_contig4036.13249.1,prot_D-dichotoma_M_contig4036.13250.1	Ec-15_001180.1
OG0000161	FALSE	prot_D-dichotoma_M_contig1754.5059.1,prot_D-dichotoma_M_contig3660.12291.1	Ec-16_000990.1,Ec-19_005280.1,Ec-20_000250.1
OG0000162	FALSE	prot_D-dichotoma_M_contig225.7542.1,prot_D-dichotoma_M_contig66.17531.1	Ec-05_003600.1,Ec-06_003520.1,Ec-28_002800.1
OG0000163	FALSE	prot_D-dichotoma_M_contig104.422.1,prot_D-dichotoma_M_contig120.1622.1,prot_D-dichotoma_M_contig1445.3260.1	Ec-21_001380.1,Ec-21_003960.1
OG0000164	TRUE	prot_D-dichotoma_M_contig1088.755.1,prot_D-dichotoma_M_contig370.12420.1,prot_D-dichotoma_M_contig709.17988.1,prot_D-dichotoma_M_contig917.19913.1	Ec-25_000800.1
OG0000165	TRUE	prot_D-dichotoma_M_contig3062.10606.1	Ec-00_005410.1,Ec-06_007300.1,Ec-06_007320.1,Ec-26_003630.1
OG0000166	TRUE	prot_D-dichotoma_M_contig2879.9931.1	Ec-00_011430.1,Ec-14_003740.1,Ec-14_003780.1,Ec-14_003940.1
OG0000167	TRUE	prot_D-dichotoma_M_contig544.16075.1	Ec-03_003240.1,Ec-06_002840.1,Ec-06_002860.1,Ec-06_002880.1
OG0000168	TRUE	prot_D-dichotoma_M_contig1942.5987.1,prot_D-dichotoma_M_contig2584.8899.1,prot_D-dichotoma_M_contig4649.14587.1,prot_D-dichotoma_M_contig5161.15599.1	Ec-19_001380.1
OG0000169	FALSE	prot_D-dichotoma_M_contig3898.12864.1,prot_D-dichotoma_M_contig651.17453.1	Ec-03_002660.1,Ec-03_002680.1,Ec-13_004130.1
OG0000170	FALSE	prot_D-dichotoma_M_contig623.17136.1,prot_D-dichotoma_M_contig908.19814.1	Ec-00_009500.1,Ec-06_000010.1,Ec-18_003550.1
OG0000171	FALSE	prot_D-dichotoma_M_contig125.1950.1,prot_D-dichotoma_M_contig2265.7595.1,prot_D-dichotoma_M_contig448.14216.1	Ec-12_000880.1,Ec-20_004230.1
OG0000172	TRUE	prot_D-dichotoma_M_contig215.7109.1,prot_D-dichotoma_M_contig568.16441.1,prot_D-dichotoma_M_contig568.16442.1,prot_D-dichotoma_M_contig923.19967.1	Ec-11_003000.1
OG0000173	FALSE	prot_D-dichotoma_M_contig1057.526.1,prot_D-dichotoma_M_contig7.17865.1,prot_D-dichotoma_M_contig7.17885.1	Ec-10_004080.1,Ec-10_004090.1
OG0000174	FALSE	prot_D-dichotoma_M_contig1221.1778.1,prot_D-dichotoma_M_contig1252.1973.1,prot_D-dichotoma_M_contig1252.1974.1	Ec-06_001430.1,Ec-06_001440.1
OG0000175	FALSE	prot_D-dichotoma_M_contig1314.2440.1,prot_D-dichotoma_M_contig1374.2769.1	Ec-02_001210.1,Ec-02_001740.1,Ec-19_000230.1
OG0000176	FALSE	prot_D-dichotoma_M_contig216.7159.1,prot_D-dichotoma_M_contig726.18140.1,prot_D-dichotoma_M_contig990.20535.1	Ec-00_002370.1,Ec-14_003150.1
OG0000177	TRUE	prot_D-dichotoma_M_contig1416.3066.1	Ec-09_004700.1,Ec-09_004710.1,Ec-16_001530.1,Ec-19_004960.1
OG0000178	FALSE	prot_D-dichotoma_M_contig1044.453.1,prot_D-dichotoma_M_contig806.18913.1,prot_D-dichotoma_M_contig806.18918.1	Ec-01_008340.1,Ec-12_004160.1
OG0000179	TRUE	prot_D-dichotoma_M_contig634.17278.1	Ec-14_005690.1,Ec-25_000330.1,Ec-25_000370.1,Ec-25_000380.1
OG0000180	TRUE	prot_D-dichotoma_M_contig1188.1500.1,prot_D-dichotoma_M_contig2108.6893.1,prot_D-dichotoma_M_contig492.15132.1,prot_D-dichotoma_M_contig4990.15241.1	Ec-11_000290.1
OG0000181	FALSE	prot_D-dichotoma_M_contig1699.4753.1,prot_D-dichotoma_M_contig1699.4755.1	Ec-13_001210.1,Ec-13_001370.1,Ec-13_001380.1
OG0000182	FALSE	prot_D-dichotoma_M_contig2544.8748.1,prot_D-dichotoma_M_contig4589.14470.1	Ec-21_002050.1,Ec-21_002060.1,Ec-21_002070.1
OG0000183	FALSE	prot_D-dichotoma_M_contig1717.4875.1,prot_D-dichotoma_M_contig3033.10526.1	Ec-00_004520.1,Ec-16_004090.1,Ec-16_004210.1
OG0000184	FALSE	prot_D-dichotoma_M_contig1431.3155.1,prot_D-dichotoma_M_contig2844.9818.1	Ec-03_005200.1,Ec-12_005210.1,Ec-26_004450.1
OG0000185	FALSE	prot_D-dichotoma_M_contig1014.211.1,prot_D-dichotoma_M_contig1165.1360.1	Ec-15_000160.1,Ec-15_000230.1,Ec-15_000240.1
OG0000186	FALSE	prot_D-dichotoma_M_contig1267.2064.1,prot_D-dichotoma_M_contig1934.5948.1,prot_D-dichotoma_M_contig2409.8250.1,prot_D-dichotoma_M_contig2805.9696.1,prot_D-dichotoma_M_contig395.13003.1	NA
OG0000187	FALSE	prot_D-dichotoma_M_contig2564.8818.1,prot_D-dichotoma_M_contig870.19476.1	Ec-08_004410.1,Ec-08_004440.1,Ec-08_004530.1
OG0000188	TRUE	prot_D-dichotoma_M_contig808.18929.1	Ec-00_007270.1,Ec-02_002970.1,Ec-02_002980.1,Ec-02_003000.1
OG0000189	TRUE	prot_D-dichotoma_M_contig80.18866.1	Ec-02_000480.1,Ec-02_000510.1,Ec-07_005990.1,Ec-10_003800.1
OG0000190	TRUE	prot_D-dichotoma_M_contig36.12130.1	Ec-07_001090.1,Ec-27_001460.1,Ec-27_001480.1,Ec-27_001490.1
OG0000191	TRUE	prot_D-dichotoma_M_contig22.7308.1	Ec-09_001820.1,Ec-09_001840.1,Ec-09_001860.1,Ec-09_002790.1
OG0000192	TRUE	prot_D-dichotoma_M_contig2330.7907.1	Ec-08_000040.1,Ec-12_000360.1,Ec-20_002860.1,Ec-20_004700.1
OG0000193	TRUE	prot_D-dichotoma_M_contig2059.6595.1	Ec-00_004500.1,Ec-04_006105.1,Ec-05_000520.1,Ec-10_003460.1
OG0000194	FALSE	prot_D-dichotoma_M_contig26.8966.1,prot_D-dichotoma_M_contig26.8967.1,prot_D-dichotoma_M_contig26.8968.1	Ec-13_004150.1,Ec-13_004170.1
OG0000195	TRUE	prot_D-dichotoma_M_contig171.4836.1,prot_D-dichotoma_M_contig171.4837.1,prot_D-dichotoma_M_contig3021.10493.1,prot_D-dichotoma_M_contig410.13430.1	Ec-20_003030.1
OG0000196	FALSE	prot_D-dichotoma_M_contig1283.2165.1,prot_D-dichotoma_M_contig1283.2168.1,prot_D-dichotoma_M_contig501.15333.1	Ec-10_002530.1,Ec-22_003060.1
OG0000197	FALSE	prot_D-dichotoma_M_contig3534.11965.1,prot_D-dichotoma_M_contig913.19875.1	Ec-01_006650.1,Ec-11_001410.1,Ec-11_001510.1
OG0000198	FALSE	prot_D-dichotoma_M_contig1050.493.1,prot_D-dichotoma_M_contig1050.494.1	Ec-19_003950.1,Ec-19_004000.1,Ec-19_004010.1
OG0000199	TRUE	prot_D-dichotoma_M_contig841.19219.1	Ec-08_005550.1,Ec-08_005560.1,Ec-16_001730.1,Ec-16_002910.1
OG0000200	FALSE	prot_D-dichotoma_M_contig661.17551.1,prot_D-dichotoma_M_contig780.18644.1	Ec-09_004670.1,Ec-11_006210.1,Ec-18_000090.1
OG0000201	FALSE	prot_D-dichotoma_M_contig49.15071.1,prot_D-dichotoma_M_contig760.18457.1	Ec-04_005940.1,Ec-04_005980.1,Ec-06_010350.1
OG0000202	FALSE	prot_D-dichotoma_M_contig130.2335.1,prot_D-dichotoma_M_contig436.14004.1	Ec-02_002300.1,Ec-15_001700.1,Ec-15_003500.1
OG0000203	TRUE	prot_D-dichotoma_M_contig230.7777.1	Ec-02_002530.1,Ec-02_002600.1,Ec-03_003720.1,Ec-sdr_f_000050.1
OG0000204	FALSE	prot_D-dichotoma_M_contig1026.308.1,prot_D-dichotoma_M_contig837.19177.1	Ec-05_005000.1,Ec-12_003580.1,Ec-12_003640.1
OG0000205	FALSE	prot_D-dichotoma_M_contig1687.4693.1,prot_D-dichotoma_M_contig2517.8662.1	Ec-10_002310.1,Ec-10_002320.1,Ec-10_005050.1
OG0000206	FALSE	prot_D-dichotoma_M_contig39.12870.1,prot_D-dichotoma_M_contig975.20433.1	Ec-17_001140.1,Ec-22_000490.1,Ec-23_001000.1
OG0000207	FALSE	prot_D-dichotoma_M_contig1031.352.1,prot_D-dichotoma_M_contig133.2540.1,prot_D-dichotoma_M_contig133.2543.1	Ec-23_004120.1,Ec-23_004140.1
OG0000208	FALSE	prot_D-dichotoma_M_contig166.4559.1,prot_D-dichotoma_M_contig432.13925.1,prot_D-dichotoma_M_contig432.13926.1	Ec-07_000030.1,Ec-23_001890.1
OG0000209	FALSE	prot_D-dichotoma_M_contig1493.3535.1,prot_D-dichotoma_M_contig1801.5313.1	Ec-00_008010.1,Ec-10_004020.1,Ec-19_005080.1
OG0000210	TRUE	prot_D-dichotoma_M_contig437.14020.1	Ec-01_009480.1,Ec-01_009940.1,Ec-01_009960.1,Ec-01_010020.1
OG0000211	FALSE	prot_D-dichotoma_M_contig659.17510.1,prot_D-dichotoma_M_contig659.17513.1	Ec-04_006000.1,Ec-09_000940.1,Ec-12_003550.1
OG0000212	TRUE	prot_D-dichotoma_M_contig227.7627.1	Ec-09_000540.1,Ec-09_000560.1,Ec-09_000580.1,Ec-09_000600.1
OG0000213	FALSE	NA	Ec-00_005970.1,Ec-08_004975.1,Ec-09_002950.1,Ec-26_001610.1,Ec-26_003620.1
OG0000214	FALSE	NA	Ec-06_002780.1,Ec-06_002800.1,Ec-10_000370.1,Ec-11_002970.1,Ec-21_000310.1
OG0000215	FALSE	NA	Ec-21_001320.1,Ec-21_001340.1,Ec-21_001350.1,Ec-21_001360.1,Ec-22_003520.1
OG0000216	TRUE	prot_D-dichotoma_M_contig1854.5536.1,prot_D-dichotoma_M_contig2875.9919.1,prot_D-dichotoma_M_contig5389.15973.1	Ec-20_002070.1
OG0000217	FALSE	prot_D-dichotoma_M_contig3611.12171.1,prot_D-dichotoma_M_contig759.18416.1	Ec-03_002200.1,Ec-16_001740.1
OG0000218	TRUE	prot_D-dichotoma_M_contig1190.1541.1	Ec-11_002330.1,Ec-12_000565.1,Ec-19_001190.1
OG0000219	TRUE	prot_D-dichotoma_M_contig1222.1782.1,prot_D-dichotoma_M_contig4160.13566.1,prot_D-dichotoma_M_contig549.16145.1	Ec-03_004620.1
OG0000220	FALSE	prot_D-dichotoma_M_contig2026.6443.1,prot_D-dichotoma_M_contig2407.8244.1	Ec-09_001030.1,Ec-14_005850.1
OG0000221	FALSE	prot_D-dichotoma_M_contig1099.848.1,prot_D-dichotoma_M_contig1435.3184.1	Ec-12_007730.1,Ec-20_000380.1
OG0000222	TRUE	prot_D-dichotoma_M_contig1197.1588.1,prot_D-dichotoma_M_contig584.16690.1,prot_D-dichotoma_M_contig584.16691.1	Ec-05_006170.1
OG0000223	FALSE	prot_D-dichotoma_M_contig1153.1267.1,prot_D-dichotoma_M_contig1701.4787.1	Ec-13_000290.1,Ec-21_000170.1
OG0000224	TRUE	prot_D-dichotoma_M_contig2984.10308.1,prot_D-dichotoma_M_contig356.12012.1,prot_D-dichotoma_M_contig4233.13737.1	Ec-15_003220.1
OG0000225	TRUE	prot_D-dichotoma_M_contig1232.1847.1,prot_D-dichotoma_M_contig2881.9946.1,prot_D-dichotoma_M_contig806.18916.1	Ec-00_009810.1
OG0000226	TRUE	prot_D-dichotoma_M_contig1032.354.1,prot_D-dichotoma_M_contig1835.5442.1,prot_D-dichotoma_M_contig2154.7136.1	Ec-23_002910.1
OG0000227	TRUE	prot_D-dichotoma_M_contig202.6420.1,prot_D-dichotoma_M_contig202.6423.1,prot_D-dichotoma_M_contig2473.8488.1	Ec-27_003110.1
OG0000228	TRUE	prot_D-dichotoma_M_contig4553.14406.1	Ec-11_000670.1,Ec-13_003840.1,Ec-27_000710.1
OG0000229	TRUE	prot_D-dichotoma_M_contig2917.10092.1	Ec-00_005260.1,Ec-05_000540.1,Ec-06_011060.1
OG0000230	TRUE	prot_D-dichotoma_M_contig1305.2364.1,prot_D-dichotoma_M_contig2857.9849.1,prot_D-dichotoma_M_contig2882.9952.1	Ec-05_003560.1
OG0000231	FALSE	prot_D-dichotoma_M_contig4790.14855.1,prot_D-dichotoma_M_contig600.16884.1	Ec-17_002680.1,Ec-24_004010.1
OG0000232	TRUE	prot_D-dichotoma_M_contig1871.5624.1,prot_D-dichotoma_M_contig623.17123.1,prot_D-dichotoma_M_contig850.19298.1	Ec-01_000220.1
OG0000233	TRUE	prot_D-dichotoma_M_contig403.13235.1,prot_D-dichotoma_M_contig403.13237.1,prot_D-dichotoma_M_contig850.19304.1	Ec-07_001790.1
OG0000234	FALSE	prot_D-dichotoma_M_contig1278.2134.1,prot_D-dichotoma_M_contig2225.7432.1	Ec-23_000560.1,Ec-26_000080.1
OG0000235	FALSE	prot_D-dichotoma_M_contig2557.8791.1,prot_D-dichotoma_M_contig3446.11708.1	Ec-15_000940.1,Ec-26_006220.1
OG0000236	FALSE	prot_D-dichotoma_M_contig1324.2498.1,prot_D-dichotoma_M_contig4755.14794.1	Ec-28_001170.1,Ec-28_002490.1
OG0000237	TRUE	prot_D-dichotoma_M_contig1325.2502.1,prot_D-dichotoma_M_contig1325.2504.1,prot_D-dichotoma_M_contig279.9617.1	Ec-28_000110.1
OG0000238	FALSE	prot_D-dichotoma_M_contig2316.7843.1,prot_D-dichotoma_M_contig524.15736.1	Ec-23_000190.1,Ec-23_001960.1
OG0000239	FALSE	prot_D-dichotoma_M_contig900.19775.1,prot_D-dichotoma_M_contig900.19776.1	Ec-09_003800.1,Ec-09_003820.1
OG0000240	TRUE	prot_D-dichotoma_M_contig264.9090.1,prot_D-dichotoma_M_contig264.9093.1,prot_D-dichotoma_M_contig327.11239.1	Ec-17_002600.1
OG0000241	FALSE	prot_D-dichotoma_M_contig744.18281.1,prot_D-dichotoma_M_contig907.19813.1	Ec-18_002290.1,Ec-27_002660.1
OG0000242	FALSE	prot_D-dichotoma_M_contig1491.3523.1,prot_D-dichotoma_M_contig1630.4407.1	Ec-15_000450.1,Ec-23_000460.1
OG0000243	TRUE	prot_D-dichotoma_M_contig74.18249.1,prot_D-dichotoma_M_contig74.18250.1,prot_D-dichotoma_M_contig74.18251.1	Ec-05_001920.1
OG0000244	TRUE	prot_D-dichotoma_M_contig1600.4201.1,prot_D-dichotoma_M_contig1600.4203.1,prot_D-dichotoma_M_contig938.20112.1	Ec-00_002120.1
OG0000245	TRUE	prot_D-dichotoma_M_contig526.15760.1	Ec-00_000930.1,Ec-25_002210.1,Ec-25_002220.1
OG0000246	FALSE	prot_D-dichotoma_M_contig2644.9099.1,prot_D-dichotoma_M_contig2644.9100.1	Ec-18_004070.1,Ec-18_004080.1
OG0000247	TRUE	prot_D-dichotoma_M_contig941.20150.1	Ec-26_001650.1,Ec-26_001660.1,Ec-26_001670.1
OG0000248	FALSE	prot_D-dichotoma_M_contig315.10891.1,prot_D-dichotoma_M_contig3869.12798.1	Ec-00_003080.1,Ec-01_010170.1
OG0000249	FALSE	prot_D-dichotoma_M_contig58.16616.1,prot_D-dichotoma_M_contig864.19412.1	Ec-01_004810.1,Ec-07_004790.1
OG0000250	FALSE	prot_D-dichotoma_M_contig1040.427.1,prot_D-dichotoma_M_contig24.8185.1	Ec-03_000860.1,Ec-14_004740.1
OG0000251	FALSE	prot_D-dichotoma_M_contig3296.11323.1,prot_D-dichotoma_M_contig4488.14233.1	Ec-10_003870.1,Ec-24_001560.1
OG0000252	FALSE	prot_D-dichotoma_M_contig714.18038.1,prot_D-dichotoma_M_contig854.19331.1	Ec-20_003430.1,Ec-24_000680.1
OG0000253	TRUE	prot_D-dichotoma_M_contig715.18043.1	Ec-04_001460.1,Ec-22_003600.1,Ec-22_003800.1
OG0000254	FALSE	prot_D-dichotoma_M_contig266.9157.1,prot_D-dichotoma_M_contig49.15088.1	Ec-14_003520.1,Ec-19_001490.1
OG0000255	TRUE	prot_D-dichotoma_M_contig615.17033.1	Ec-00_003890.1,Ec-03_002310.1,Ec-19_003260.1
OG0000256	FALSE	prot_D-dichotoma_M_contig1911.5839.1,prot_D-dichotoma_M_contig2208.7382.1	Ec-14_005180.1,Ec-18_002310.1
OG0000257	TRUE	prot_D-dichotoma_M_contig2208.7383.1	Ec-15_002180.1,Ec-18_002220.1,Ec-18_002270.1
OG0000258	TRUE	prot_D-dichotoma_M_contig820.19030.1,prot_D-dichotoma_M_contig820.19034.1,prot_D-dichotoma_M_contig820.19036.1	Ec-24_004030.1
OG0000259	FALSE	prot_D-dichotoma_M_contig1989.6195.1,prot_D-dichotoma_M_contig914.19892.1	Ec-06_004850.1,Ec-06_006795.1
OG0000260	TRUE	prot_D-dichotoma_M_contig1989.6197.1	Ec-23_002290.1,Ec-23_002330.1,Ec-23_002340.1
OG0000261	FALSE	prot_D-dichotoma_M_contig1990.6207.1,prot_D-dichotoma_M_contig598.16836.1	Ec-09_001630.1,Ec-28_000860.1
OG0000262	FALSE	prot_D-dichotoma_M_contig1995.6225.1,prot_D-dichotoma_M_contig1995.6226.1	Ec-24_002070.1,Ec-24_002090.1
OG0000263	FALSE	prot_D-dichotoma_M_contig3383.11544.1,prot_D-dichotoma_M_contig785.18678.1	Ec-02_001950.1,Ec-23_004110.1
OG0000264	FALSE	prot_D-dichotoma_M_contig1255.1991.1,prot_D-dichotoma_M_contig1433.3172.1	Ec-08_004000.1,Ec-08_004050.1
OG0000265	TRUE	prot_D-dichotoma_M_contig1462.3369.1	Ec-04_001360.1,Ec-04_001470.1,Ec-16_000930.1
OG0000266	TRUE	prot_D-dichotoma_M_contig467.14618.1	Ec-08_004460.1,Ec-08_004470.1,Ec-08_004520.1
OG0000267	TRUE	prot_D-dichotoma_M_contig1192.1549.1	Ec-11_005600.1,Ec-12_004420.1,Ec-12_004430.1
OG0000268	FALSE	prot_D-dichotoma_M_contig1110.956.1,prot_D-dichotoma_M_contig3962.13029.1	Ec-12_006180.1,Ec-19_004290.1
OG0000269	FALSE	prot_D-dichotoma_M_contig1015.218.1,prot_D-dichotoma_M_contig243.8318.1	Ec-27_006790.1,Ec-27_006850.1
OG0000270	FALSE	prot_D-dichotoma_M_contig2364.8033.1,prot_D-dichotoma_M_contig243.8319.1	Ec-11_005510.1,Ec-28_003400.1
OG0000271	TRUE	prot_D-dichotoma_M_contig148.3440.1,prot_D-dichotoma_M_contig148.3452.1,prot_D-dichotoma_M_contig2783.9595.1	Ec-09_004830.1
OG0000272	TRUE	prot_D-dichotoma_M_contig1056.522.1,prot_D-dichotoma_M_contig1701.4791.1,prot_D-dichotoma_M_contig1844.5485.1	Ec-26_000110.1
OG0000273	TRUE	prot_D-dichotoma_M_contig91.19827.1	Ec-13_004510.1,Ec-20_000090.1,Ec-25_000270.1
OG0000274	TRUE	prot_D-dichotoma_M_contig1219.1759.1	Ec-00_002490.1,Ec-00_007980.1,Ec-03_005170.1
OG0000275	FALSE	prot_D-dichotoma_M_contig236.8011.1,prot_D-dichotoma_M_contig2377.8086.1	Ec-00_001700.1,Ec-14_005260.1
OG0000276	FALSE	prot_D-dichotoma_M_contig2443.8379.1,prot_D-dichotoma_M_contig47.14673.1	Ec-10_003510.1,Ec-10_003690.1
OG0000277	FALSE	prot_D-dichotoma_M_contig554.16222.1,prot_D-dichotoma_M_contig554.16223.1	Ec-16_004300.1,Ec-24_001640.1
OG0000278	FALSE	prot_D-dichotoma_M_contig1070.635.1,prot_D-dichotoma_M_contig1070.636.1	Ec-05_002920.1,Ec-06_009190.1
OG0000279	FALSE	prot_D-dichotoma_M_contig88.19563.1,prot_D-dichotoma_M_contig88.19565.1	Ec-13_001020.1,Ec-13_001170.1
OG0000280	TRUE	prot_D-dichotoma_M_contig548.16129.1	Ec-08_005040.1,Ec-10_003380.1,Ec-27_002330.1
OG0000281	TRUE	prot_D-dichotoma_M_contig495.15172.1	Ec-05_000160.1,Ec-05_000320.1,Ec-21_002230.1
OG0000282	FALSE	prot_D-dichotoma_M_contig1083.711.1,prot_D-dichotoma_M_contig94.20136.1	Ec-00_005790.1,Ec-06_008540.1
OG0000283	FALSE	prot_D-dichotoma_M_contig193.5920.1,prot_D-dichotoma_M_contig364.12246.1	Ec-02_003640.1,Ec-03_001010.1
OG0000284	TRUE	prot_D-dichotoma_M_contig1757.5069.1	Ec-02_003490.1,Ec-20_000900.1,Ec-20_002590.1
OG0000285	TRUE	prot_D-dichotoma_M_contig1164.1356.1,prot_D-dichotoma_M_contig93.20036.1,prot_D-dichotoma_M_contig93.20038.1	Ec-11_000610.1
OG0000286	TRUE	prot_D-dichotoma_M_contig174.4982.1	Ec-03_002070.1,Ec-12_008960.1,Ec-12_008970.1
OG0000287	FALSE	prot_D-dichotoma_M_contig3525.11938.1,prot_D-dichotoma_M_contig50.15296.1	Ec-09_001600.1,Ec-25_001100.1
OG0000288	FALSE	prot_D-dichotoma_M_contig1781.5182.1,prot_D-dichotoma_M_contig596.16818.1	Ec-00_004740.1,Ec-07_007450.1
OG0000289	FALSE	prot_D-dichotoma_M_contig1787.5194.1,prot_D-dichotoma_M_contig3049.10559.1	Ec-17_003640.1,Ec-17_003650.1
OG0000290	FALSE	prot_D-dichotoma_M_contig1167.1363.1,prot_D-dichotoma_M_contig844.19251.1	Ec-03_001110.1,Ec-06_002110.1
OG0000291	TRUE	prot_D-dichotoma_M_contig5057.15416.1	Ec-00_003870.1,Ec-12_003660.1,Ec-21_002390.1
OG0000292	TRUE	prot_D-dichotoma_M_contig5057.15417.1	Ec-00_005090.1,Ec-05_000440.1,Ec-26_000100.1
OG0000293	FALSE	prot_D-dichotoma_M_contig1524.3731.1,prot_D-dichotoma_M_contig2147.7097.1	Ec-10_003480.1,Ec-10_003500.1
OG0000294	TRUE	prot_D-dichotoma_M_contig1527.3738.1	Ec-03_005250.1,Ec-03_005310.1,Ec-06_009450.1
OG0000295	TRUE	prot_D-dichotoma_M_contig931.20052.1	Ec-14_000300.1,Ec-14_000310.1,Ec-14_000350.1
OG0000296	TRUE	prot_D-dichotoma_M_contig1434.3178.1,prot_D-dichotoma_M_contig1434.3179.1,prot_D-dichotoma_M_contig3756.12530.1	Ec-16_002310.1
OG0000297	TRUE	prot_D-dichotoma_M_contig455.14401.1	Ec-06_001820.1,Ec-22_000560.1,Ec-22_000570.1
OG0000298	FALSE	prot_D-dichotoma_M_contig116.1318.1,prot_D-dichotoma_M_contig502.15355.1	Ec-03_004170.1,Ec-14_003330.1
OG0000299	TRUE	prot_D-dichotoma_M_contig184.5457.1	Ec-10_003370.1,Ec-10_003390.1,Ec-10_003700.1
OG0000300	FALSE	prot_D-dichotoma_M_contig3955.13013.1,prot_D-dichotoma_M_contig4436.14152.1	Ec-00_007180.1,Ec-13_001960.1
OG0000301	FALSE	prot_D-dichotoma_M_contig1115.985.1,prot_D-dichotoma_M_contig402.13220.1	Ec-01_008570.1,Ec-10_003530.1
OG0000302	TRUE	prot_D-dichotoma_M_contig1538.3799.1	Ec-24_004130.1,Ec-24_004140.1,Ec-24_004170.1
OG0000303	FALSE	prot_D-dichotoma_M_contig3042.10547.1,prot_D-dichotoma_M_contig591.16774.1	Ec-00_002320.1,Ec-11_003800.1
OG0000304	FALSE	prot_D-dichotoma_M_contig206.6597.1,prot_D-dichotoma_M_contig3412.11637.1	Ec-03_002910.1,Ec-21_004900.1
OG0000305	TRUE	prot_D-dichotoma_M_contig1342.2598.1	Ec-06_009240.1,Ec-06_009250.1,Ec-06_009270.1
OG0000306	FALSE	prot_D-dichotoma_M_contig1079.682.1,prot_D-dichotoma_M_contig1079.683.1	Ec-28_002600.1,Ec-28_002610.1
OG0000307	FALSE	prot_D-dichotoma_M_contig3136.10844.1,prot_D-dichotoma_M_contig422.13704.1	Ec-18_002400.1,Ec-27_004700.1
OG0000308	FALSE	prot_D-dichotoma_M_contig1395.2918.1,prot_D-dichotoma_M_contig1395.2922.1	Ec-08_003790.1,Ec-22_000100.1
OG0000309	FALSE	prot_D-dichotoma_M_contig531.15854.1,prot_D-dichotoma_M_contig668.17597.1	Ec-28_002370.1,Ec-28_002380.1
OG0000310	FALSE	prot_D-dichotoma_M_contig832.19135.1,prot_D-dichotoma_M_contig832.19136.1	Ec-08_005100.1,Ec-19_000320.1
OG0000311	TRUE	prot_D-dichotoma_M_contig1296.2250.1,prot_D-dichotoma_M_contig663.17565.1,prot_D-dichotoma_M_contig663.17568.1	Ec-07_001310.1
OG0000312	TRUE	prot_D-dichotoma_M_contig1098.840.1	Ec-00_008740.1,Ec-04_005860.1,Ec-04_005900.1
OG0000313	FALSE	prot_D-dichotoma_M_contig391.12924.1,prot_D-dichotoma_M_contig442.14119.1	Ec-00_010810.1,Ec-07_001720.1
OG0000314	TRUE	prot_D-dichotoma_M_contig5.15291.1,prot_D-dichotoma_M_contig5.15292.1,prot_D-dichotoma_M_contig5.15293.1	Ec-02_003060.1
OG0000315	TRUE	prot_D-dichotoma_M_contig132.2467.1	Ec-02_005270.1,Ec-02_005280.1,Ec-02_005420.1
OG0000316	TRUE	prot_D-dichotoma_M_contig35.11872.1	Ec-05_000150.1,Ec-13_004780.1,Ec-22_000870.1
OG0000317	TRUE	prot_D-dichotoma_M_contig58.16612.1	Ec-01_004660.1,Ec-03_001370.1,Ec-26_002480.1
OG0000318	FALSE	prot_D-dichotoma_M_contig1024.297.1,prot_D-dichotoma_M_contig3138.10848.1	Ec-02_002710.1,Ec-02_002760.1
OG0000319	FALSE	prot_D-dichotoma_M_contig1158.1289.1,prot_D-dichotoma_M_contig1158.1290.1	Ec-26_001830.1,Ec-26_002430.1
OG0000320	TRUE	prot_D-dichotoma_M_contig166.4569.1	Ec-16_003690.1,Ec-26_004550.1,Ec-26_005230.1
OG0000321	TRUE	prot_D-dichotoma_M_contig55.16159.1	Ec-04_005180.1,Ec-04_005200.1,Ec-04_005230.1
OG0000322	TRUE	prot_D-dichotoma_M_contig1195.1568.1,prot_D-dichotoma_M_contig1195.1569.1,prot_D-dichotoma_M_contig1195.1570.1	Ec-24_003640.1
OG0000323	FALSE	prot_D-dichotoma_M_contig1298.2263.1,prot_D-dichotoma_M_contig1298.2264.1	Ec-10_004290.1,Ec-24_000010.1
OG0000324	TRUE	prot_D-dichotoma_M_contig1647.4480.1,prot_D-dichotoma_M_contig3125.10810.1,prot_D-dichotoma_M_contig3472.11783.1	Ec-00_011230.1
OG0000325	TRUE	prot_D-dichotoma_M_contig959.20296.1	Ec-00_009070.1,Ec-22_002800.1,Ec-22_003130.1
OG0000326	TRUE	prot_D-dichotoma_M_contig24.8197.1	Ec-03_002100.1,Ec-21_000670.1,Ec-21_000680.1
OG0000327	TRUE	prot_D-dichotoma_M_contig2814.9728.1	Ec-06_002810.1,Ec-06_002830.1,Ec-18_002140.1
OG0000328	TRUE	prot_D-dichotoma_M_contig659.17514.1	Ec-27_005620.1,Ec-27_006390.1,Ec-27_006400.1
OG0000329	FALSE	prot_D-dichotoma_M_contig1411.3053.1,prot_D-dichotoma_M_contig223.7457.1	Ec-19_003150.1,Ec-19_003160.1
OG0000330	TRUE	prot_D-dichotoma_M_contig345.11718.1	Ec-14_000990.1,Ec-14_001790.1,Ec-14_001940.1
OG0000331	FALSE	NA	Ec-00_004440.1,Ec-00_005030.1,Ec-00_009600.1,Ec-24_001770.1
OG0000332	FALSE	NA	Ec-00_008930.1,Ec-05_006630.1,Ec-05_006640.1,Ec-09_004400.1
OG0000333	FALSE	NA	Ec-05_003690.1,Ec-05_003710.1,Ec-05_003870.1,Ec-17_002540.1
OG0000334	TRUE	prot_D-dichotoma_M_contig684.17722.1	Ec-17_000050.1,Ec-20_000990.1
OG0000335	TRUE	prot_D-dichotoma_M_contig1516.3672.1,prot_D-dichotoma_M_contig1685.4685.1	Ec-26_002750.1
OG0000336	TRUE	prot_D-dichotoma_M_contig730.18182.1,prot_D-dichotoma_M_contig96.20298.1	Ec-14_002500.1
OG0000337	TRUE	prot_D-dichotoma_M_contig2197.7300.1	Ec-06_008970.1,Ec-27_001100.1
OG0000338	TRUE	prot_D-dichotoma_M_contig510.15506.1,prot_D-dichotoma_M_contig681.17700.1	Ec-15_002500.1
OG0000339	TRUE	prot_D-dichotoma_M_contig149.3516.1,prot_D-dichotoma_M_contig420.13665.1	Ec-14_004340.1
OG0000340	TRUE	prot_D-dichotoma_M_contig2108.6895.1,prot_D-dichotoma_M_contig47.14672.1	Ec-07_007600.1
OG0000341	TRUE	prot_D-dichotoma_M_contig160.4189.1,prot_D-dichotoma_M_contig642.17375.1	Ec-07_001800.1
OG0000342	TRUE	prot_D-dichotoma_M_contig2896.9994.1,prot_D-dichotoma_M_contig4934.15152.1	Ec-07_001410.1
OG0000343	TRUE	prot_D-dichotoma_M_contig1782.5183.1,prot_D-dichotoma_M_contig1782.5184.1	Ec-03_002440.1
OG0000344	TRUE	prot_D-dichotoma_M_contig2056.6581.1,prot_D-dichotoma_M_contig2440.8371.1	Ec-04_006440.1
OG0000345	TRUE	prot_D-dichotoma_M_contig742.18263.1	Ec-00_005490.1,Ec-18_004620.1
OG0000346	TRUE	prot_D-dichotoma_M_contig1169.1387.1	Ec-00_002240.1,Ec-14_002080.1
OG0000347	TRUE	prot_D-dichotoma_M_contig1850.5521.1,prot_D-dichotoma_M_contig959.20297.1	Ec-22_002780.1
OG0000348	TRUE	prot_D-dichotoma_M_contig875.19519.1	Ec-00_006390.1,Ec-09_002310.1
OG0000349	TRUE	prot_D-dichotoma_M_contig9.19748.1,prot_D-dichotoma_M_contig9.19749.1	Ec-09_000990.1
OG0000350	TRUE	prot_D-dichotoma_M_contig2075.6698.1,prot_D-dichotoma_M_contig376.12536.1	Ec-09_001780.1
OG0000351	TRUE	prot_D-dichotoma_M_contig11.849.1	Ec-16_004790.1,Ec-16_005050.1
OG0000352	TRUE	prot_D-dichotoma_M_contig370.12421.1,prot_D-dichotoma_M_contig390.12890.1	Ec-10_002270.1
OG0000353	TRUE	prot_D-dichotoma_M_contig10.63.1	Ec-08_000720.1,Ec-21_001050.1
OG0000354	TRUE	prot_D-dichotoma_M_contig70.17899.1	Ec-00_006610.1,Ec-00_009030.1
OG0000355	TRUE	prot_D-dichotoma_M_contig1140.1179.1	Ec-04_001930.1,Ec-04_001970.1
OG0000356	TRUE	prot_D-dichotoma_M_contig1556.3897.1,prot_D-dichotoma_M_contig4528.14353.1	Ec-13_003430.1
OG0000357	TRUE	prot_D-dichotoma_M_contig1202.1647.1	Ec-20_000870.1,Ec-20_000880.1
OG0000358	TRUE	prot_D-dichotoma_M_contig934.20078.1	Ec-03_002300.1,Ec-24_002550.1
OG0000359	TRUE	prot_D-dichotoma_M_contig934.20082.1	Ec-24_003520.1,Ec-24_003530.1
OG0000360	TRUE	prot_D-dichotoma_M_contig387.12812.1,prot_D-dichotoma_M_contig937.20097.1	Ec-07_003880.1
OG0000361	TRUE	prot_D-dichotoma_M_contig720.18104.1	Ec-05_001300.1,Ec-05_001360.1
OG0000362	TRUE	prot_D-dichotoma_M_contig167.4614.1,prot_D-dichotoma_M_contig519.15637.1	Ec-02_005570.1
OG0000363	TRUE	prot_D-dichotoma_M_contig521.15692.1	Ec-00_002190.1,Ec-18_000260.1
OG0000364	TRUE	prot_D-dichotoma_M_contig521.15694.1	Ec-14_003440.1,Ec-18_000420.1
OG0000365	TRUE	prot_D-dichotoma_M_contig2848.9824.1,prot_D-dichotoma_M_contig567.16420.1	Ec-04_003430.1
OG0000366	TRUE	prot_D-dichotoma_M_contig385.12753.1,prot_D-dichotoma_M_contig683.17712.1	Ec-06_008150.1
OG0000367	TRUE	prot_D-dichotoma_M_contig1010.182.1,prot_D-dichotoma_M_contig3173.10953.1	Ec-00_000650.1
OG0000368	TRUE	prot_D-dichotoma_M_contig1307.2377.1,prot_D-dichotoma_M_contig3069.10616.1	Ec-16_002350.1
OG0000369	TRUE	prot_D-dichotoma_M_contig109.769.1	Ec-01_001110.1,Ec-01_001120.1
OG0000370	TRUE	prot_D-dichotoma_M_contig319.10996.1	Ec-10_001810.1,Ec-12_005540.1
OG0000371	TRUE	prot_D-dichotoma_M_contig82.19015.1	Ec-19_005180.1,Ec-19_005310.1
OG0000372	TRUE	prot_D-dichotoma_M_contig1120.1040.1	Ec-01_005990.1,Ec-01_006000.1
OG0000373	TRUE	prot_D-dichotoma_M_contig1.28.1	Ec-05_001330.1,Ec-05_001420.1
OG0000374	TRUE	prot_D-dichotoma_M_contig2316.7846.1	Ec-25_002260.1,Ec-25_002270.1
OG0000375	TRUE	prot_D-dichotoma_M_contig2318.7852.1,prot_D-dichotoma_M_contig2892.9984.1	Ec-02_000850.1
OG0000376	TRUE	prot_D-dichotoma_M_contig1265.2056.1,prot_D-dichotoma_M_contig2595.8936.1	Ec-06_002250.1
OG0000377	TRUE	prot_D-dichotoma_M_contig2603.8989.1	Ec-19_004880.1,Ec-19_004990.1
OG0000378	TRUE	prot_D-dichotoma_M_contig1017.235.1,prot_D-dichotoma_M_contig1616.4302.1	Ec-09_002780.1
OG0000379	TRUE	prot_D-dichotoma_M_contig1968.6086.1	Ec-07_004460.1,Ec-08_001480.1
OG0000380	TRUE	prot_D-dichotoma_M_contig2590.8927.1,prot_D-dichotoma_M_contig5736.16533.1	Ec-05_005150.1
OG0000381	TRUE	prot_D-dichotoma_M_contig2696.9290.1,prot_D-dichotoma_M_contig327.11247.1	Ec-17_004090.1
OG0000382	TRUE	prot_D-dichotoma_M_contig32.11025.1,prot_D-dichotoma_M_contig84.19200.1	Ec-05_004680.1
OG0000383	TRUE	prot_D-dichotoma_M_contig2839.9805.1	Ec-09_002620.1,Ec-09_002630.1
OG0000384	TRUE	prot_D-dichotoma_M_contig1565.3958.1	Ec-24_001780.1,Ec-24_001785.1
OG0000385	TRUE	prot_D-dichotoma_M_contig124.1904.1,prot_D-dichotoma_M_contig64.17347.1	Ec-04_000240.1
OG0000386	TRUE	prot_D-dichotoma_M_contig1627.4385.1	Ec-01_003940.1,Ec-01_008360.1
OG0000387	TRUE	prot_D-dichotoma_M_contig1520.3708.1	Ec-00_002690.1,Ec-02_004910.1
OG0000388	TRUE	prot_D-dichotoma_M_contig1390.2887.1,prot_D-dichotoma_M_contig148.3453.1	Ec-06_000760.1
OG0000389	TRUE	prot_D-dichotoma_M_contig1606.4233.1	Ec-16_003150.1,Ec-16_003240.1
OG0000390	TRUE	prot_D-dichotoma_M_contig104.408.1,prot_D-dichotoma_M_contig5264.15765.1	Ec-21_000890.1
OG0000391	TRUE	prot_D-dichotoma_M_contig339.11559.1,prot_D-dichotoma_M_contig87.19450.1	Ec-16_002980.1
OG0000392	TRUE	prot_D-dichotoma_M_contig155.3860.1,prot_D-dichotoma_M_contig155.3866.1	Ec-23_001730.1
OG0000393	TRUE	prot_D-dichotoma_M_contig279.9625.1	Ec-15_000170.1,Ec-16_004120.1
OG0000394	TRUE	prot_D-dichotoma_M_contig707.17969.1,prot_D-dichotoma_M_contig996.20562.1	Ec-12_007600.1
OG0000395	TRUE	prot_D-dichotoma_M_contig7.17870.1	Ec-10_000920.1,Ec-10_000950.1
OG0000396	TRUE	prot_D-dichotoma_M_contig7.17887.1	Ec-10_004140.1,Ec-10_004150.1
OG0000397	TRUE	prot_D-dichotoma_M_contig746.18302.1	Ec-28_001240.1,Ec-28_001250.1
OG0000398	TRUE	prot_D-dichotoma_M_contig747.18306.1,prot_D-dichotoma_M_contig839.19187.1	Ec-26_005480.1
OG0000399	TRUE	prot_D-dichotoma_M_contig1819.5380.1	Ec-02_001990.1,Ec-02_002160.1
OG0000400	TRUE	prot_D-dichotoma_M_contig691.17790.1	Ec-02_001370.1,Ec-14_001060.1
OG0000401	TRUE	prot_D-dichotoma_M_contig238.8107.1	Ec-15_000860.1,Ec-15_000870.1
OG0000402	TRUE	prot_D-dichotoma_M_contig865.19418.1	Ec-21_000570.1,Ec-26_001620.1
OG0000403	TRUE	prot_D-dichotoma_M_contig1042.445.1,prot_D-dichotoma_M_contig1910.5834.1	Ec-03_003740.1
OG0000404	TRUE	prot_D-dichotoma_M_contig302.10479.1	Ec-08_003700.1,Ec-19_003820.1
OG0000405	TRUE	prot_D-dichotoma_M_contig2442.8375.1,prot_D-dichotoma_M_contig615.17032.1	Ec-12_007980.1
OG0000406	TRUE	prot_D-dichotoma_M_contig292.10098.1	Ec-07_000060.1,Ec-07_000070.1
OG0000407	TRUE	prot_D-dichotoma_M_contig292.10099.1,prot_D-dichotoma_M_contig292.10102.1	Ec-07_000010.1
OG0000408	TRUE	prot_D-dichotoma_M_contig621.17109.1	Ec-13_001950.1,Ec-sdr_f_000030.1
OG0000409	TRUE	prot_D-dichotoma_M_contig118.1446.1	Ec-00_003220.1,Ec-08_004840.1
OG0000410	TRUE	prot_D-dichotoma_M_contig203.6464.1	Ec-27_001550.1,Ec-27_001560.1
OG0000411	TRUE	prot_D-dichotoma_M_contig203.6473.1	Ec-07_002180.1,Ec-16_000910.1
OG0000412	TRUE	prot_D-dichotoma_M_contig4235.13739.1,prot_D-dichotoma_M_contig64.17345.1	Ec-04_002210.1
OG0000413	TRUE	prot_D-dichotoma_M_contig1578.4009.1	Ec-11_000410.1,Ec-11_000680.1
OG0000414	TRUE	prot_D-dichotoma_M_contig1583.4042.1,prot_D-dichotoma_M_contig2392.8156.1	Ec-01_008070.1
OG0000415	TRUE	prot_D-dichotoma_M_contig4716.14714.1,prot_D-dichotoma_M_contig4971.15204.1	Ec-04_001860.1
OG0000416	TRUE	prot_D-dichotoma_M_contig588.16736.1,prot_D-dichotoma_M_contig822.19045.1	Ec-09_003660.1
OG0000417	TRUE	prot_D-dichotoma_M_contig161.4270.1,prot_D-dichotoma_M_contig2501.8598.1	Ec-01_002730.1
OG0000418	TRUE	prot_D-dichotoma_M_contig1256.1998.1,prot_D-dichotoma_M_contig1286.2182.1	Ec-08_001720.1
OG0000419	TRUE	prot_D-dichotoma_M_contig1475.3420.1,prot_D-dichotoma_M_contig426.13798.1	Ec-16_003310.1
OG0000420	TRUE	prot_D-dichotoma_M_contig151.3644.1,prot_D-dichotoma_M_contig151.3645.1	Ec-00_000940.1
OG0000421	TRUE	prot_D-dichotoma_M_contig1130.1107.1,prot_D-dichotoma_M_contig95.20219.1	Ec-12_003620.1
OG0000422	TRUE	prot_D-dichotoma_M_contig2444.8385.1,prot_D-dichotoma_M_contig3238.11172.1	Ec-03_004090.1
OG0000423	TRUE	prot_D-dichotoma_M_contig1807.5334.1	Ec-14_004820.1,Ec-14_006350.1
OG0000424	TRUE	prot_D-dichotoma_M_contig970.20398.1	Ec-08_004970.1,Ec-14_001910.1
OG0000425	TRUE	prot_D-dichotoma_M_contig6.16868.1,prot_D-dichotoma_M_contig970.20400.1	Ec-27_006410.1
OG0000426	TRUE	prot_D-dichotoma_M_contig324.11181.1,prot_D-dichotoma_M_contig324.11182.1	Ec-13_000350.1
OG0000427	TRUE	prot_D-dichotoma_M_contig1191.1547.1	Ec-03_004690.1,Ec-03_004710.1
OG0000428	TRUE	prot_D-dichotoma_M_contig216.7154.1	Ec-14_005680.1,Ec-14_005710.1
OG0000429	TRUE	prot_D-dichotoma_M_contig3784.12588.1	Ec-00_010400.1,Ec-26_002580.1
OG0000430	TRUE	prot_D-dichotoma_M_contig73.18173.1	Ec-00_003250.1,Ec-25_002940.1
OG0000431	TRUE	prot_D-dichotoma_M_contig1105.924.1	Ec-00_002840.1,Ec-14_000900.1
OG0000432	TRUE	prot_D-dichotoma_M_contig1108.936.1,prot_D-dichotoma_M_contig2818.9735.1	Ec-09_000970.1
OG0000433	TRUE	prot_D-dichotoma_M_contig4988.15226.1	Ec-27_002020.1,Ec-27_002030.1
OG0000434	FALSE	prot_D-dichotoma_M_contig1241.1912.1,prot_D-dichotoma_M_contig1863.5572.1,prot_D-dichotoma_M_contig2065.6633.1	NA
OG0000435	TRUE	prot_D-dichotoma_M_contig456.14413.1	Ec-10_004750.1,Ec-10_004800.1
OG0000436	TRUE	prot_D-dichotoma_M_contig2914.10087.1	Ec-01_001850.1,Ec-01_002500.1
OG0000437	TRUE	prot_D-dichotoma_M_contig2166.7179.1,prot_D-dichotoma_M_contig3634.12219.1	Ec-06_000090.1
OG0000438	TRUE	prot_D-dichotoma_M_contig2166.7180.1,prot_D-dichotoma_M_contig3634.12222.1	Ec-06_000080.1
OG0000439	TRUE	prot_D-dichotoma_M_contig2241.7511.1	Ec-27_000390.1,Ec-27_000400.1
OG0000440	TRUE	prot_D-dichotoma_M_contig138.2817.1,prot_D-dichotoma_M_contig190.5768.1	Ec-21_001180.1
OG0000441	TRUE	prot_D-dichotoma_M_contig2108.6896.1	Ec-01_002830.1,Ec-14_003350.1
OG0000442	TRUE	prot_D-dichotoma_M_contig552.16190.1	Ec-27_001410.1,Ec-27_001420.1
OG0000443	TRUE	prot_D-dichotoma_M_contig1552.3880.1	Ec-00_002250.1,Ec-10_001340.1
OG0000444	TRUE	prot_D-dichotoma_M_contig1007.143.1,prot_D-dichotoma_M_contig2493.8561.1	Ec-22_001800.1
OG0000445	TRUE	prot_D-dichotoma_M_contig1008.149.1,prot_D-dichotoma_M_contig1008.150.1	Ec-07_007190.1
OG0000446	TRUE	prot_D-dichotoma_M_contig1714.4864.1,prot_D-dichotoma_M_contig3524.11935.1	Ec-01_006880.1
OG0000447	TRUE	prot_D-dichotoma_M_contig69.17771.1	Ec-01_008080.1,Ec-01_008100.1
OG0000448	TRUE	prot_D-dichotoma_M_contig656.17499.1	Ec-19_002750.1,Ec-19_002760.1
OG0000449	TRUE	prot_D-dichotoma_M_contig20.6308.1	Ec-26_005370.1,Ec-26_005380.1
OG0000450	TRUE	prot_D-dichotoma_M_contig1069.618.1,prot_D-dichotoma_M_contig1069.619.1	Ec-09_004640.1
OG0000451	TRUE	prot_D-dichotoma_M_contig334.11453.1,prot_D-dichotoma_M_contig794.18761.1	Ec-28_002040.1
OG0000452	TRUE	prot_D-dichotoma_M_contig334.11455.1,prot_D-dichotoma_M_contig334.11457.1	Ec-14_005960.1
OG0000453	TRUE	prot_D-dichotoma_M_contig41.13421.1	Ec-06_004420.1,Ec-06_004450.1
OG0000454	TRUE	prot_D-dichotoma_M_contig1862.5570.1	Ec-09_001320.1,Ec-25_002130.1
OG0000455	TRUE	prot_D-dichotoma_M_contig1864.5574.1	Ec-00_000520.1,Ec-18_004370.1
OG0000456	TRUE	prot_D-dichotoma_M_contig246.8435.1	Ec-01_010900.1,Ec-01_010910.1
OG0000457	TRUE	prot_D-dichotoma_M_contig2029.6461.1	Ec-02_000040.1,Ec-02_000080.1
OG0000458	TRUE	prot_D-dichotoma_M_contig2035.6499.1	Ec-02_000530.1,Ec-02_001110.1
OG0000459	TRUE	prot_D-dichotoma_M_contig1937.5960.1	Ec-25_003040.1,Ec-26_004510.1
OG0000460	TRUE	prot_D-dichotoma_M_contig495.15173.1,prot_D-dichotoma_M_contig495.15174.1	Ec-18_003920.1
OG0000461	TRUE	prot_D-dichotoma_M_contig712.18029.1	Ec-16_003960.1,Ec-20_000940.1
OG0000462	TRUE	prot_D-dichotoma_M_contig2890.9981.1	Ec-08_001690.1,Ec-08_002950.1
OG0000463	TRUE	prot_D-dichotoma_M_contig2892.9983.1,prot_D-dichotoma_M_contig669.17602.1	Ec-27_003980.1
OG0000464	TRUE	prot_D-dichotoma_M_contig2892.9986.1	Ec-15_002910.1,Ec-15_002920.1
OG0000465	TRUE	prot_D-dichotoma_M_contig464.14576.1	Ec-08_000630.1,Ec-16_004290.1
OG0000466	TRUE	prot_D-dichotoma_M_contig464.14579.1,prot_D-dichotoma_M_contig464.14580.1	Ec-04_000660.1
OG0000467	TRUE	prot_D-dichotoma_M_contig2263.7587.1	Ec-06_001220.1,Ec-06_001240.1
OG0000468	TRUE	prot_D-dichotoma_M_contig1082.708.1,prot_D-dichotoma_M_contig560.16348.1	Ec-23_001210.1
OG0000469	TRUE	prot_D-dichotoma_M_contig1083.713.1	Ec-10_000380.1,Ec-10_000390.1
OG0000470	TRUE	prot_D-dichotoma_M_contig143.3141.1	Ec-02_000950.1,Ec-02_000970.1
OG0000471	TRUE	prot_D-dichotoma_M_contig1790.5214.1,prot_D-dichotoma_M_contig886.19634.1	Ec-14_004250.1
OG0000472	TRUE	prot_D-dichotoma_M_contig3661.12293.1	Ec-01_009640.1,Ec-01_009690.1
OG0000473	TRUE	prot_D-dichotoma_M_contig36.12135.1	Ec-27_005340.1,Ec-27_005350.1
OG0000474	TRUE	prot_D-dichotoma_M_contig37.12401.1	Ec-13_000370.1,Ec-13_000380.1
OG0000475	TRUE	prot_D-dichotoma_M_contig4037.13252.1,prot_D-dichotoma_M_contig732.18187.1	Ec-08_003410.1
OG0000476	TRUE	prot_D-dichotoma_M_contig1754.5056.1	Ec-05_000590.1,Ec-19_005240.1
OG0000477	TRUE	prot_D-dichotoma_M_contig1265.2054.1,prot_D-dichotoma_M_contig1758.5072.1	Ec-06_002480.1
OG0000478	TRUE	prot_D-dichotoma_M_contig13.2302.1	Ec-01_007160.1,Ec-04_002150.1
OG0000479	TRUE	prot_D-dichotoma_M_contig773.18588.1	Ec-05_006310.1,Ec-05_006330.1
OG0000480	TRUE	prot_D-dichotoma_M_contig2998.10343.1	Ec-01_003750.1,Ec-13_004450.1
OG0000481	TRUE	prot_D-dichotoma_M_contig461.14533.1	Ec-04_001740.1,Ec-04_001750.1
OG0000482	TRUE	prot_D-dichotoma_M_contig752.18362.1,prot_D-dichotoma_M_contig752.18364.1	Ec-19_004270.1
OG0000483	TRUE	prot_D-dichotoma_M_contig2960.10230.1	Ec-11_003750.1,Ec-14_003590.1
OG0000484	TRUE	prot_D-dichotoma_M_contig3308.11377.1	Ec-07_001340.1,Ec-07_002530.1
OG0000485	TRUE	prot_D-dichotoma_M_contig52.15651.1	Ec-05_005010.1,Ec-05_005100.1
OG0000486	TRUE	prot_D-dichotoma_M_contig1268.2066.1,prot_D-dichotoma_M_contig1268.2067.1	Ec-11_002190.1
OG0000487	TRUE	prot_D-dichotoma_M_contig1273.2111.1,prot_D-dichotoma_M_contig1273.2112.1	Ec-17_002690.1
OG0000488	TRUE	prot_D-dichotoma_M_contig255.8769.1	Ec-04_003940.1,Ec-04_003950.1
OG0000489	TRUE	prot_D-dichotoma_M_contig3149.10883.1,prot_D-dichotoma_M_contig4840.14972.1	Ec-06_008550.1
OG0000490	TRUE	prot_D-dichotoma_M_contig1530.3766.1	Ec-24_002360.1,Ec-27_001950.1
OG0000491	TRUE	prot_D-dichotoma_M_contig28.9656.1,prot_D-dichotoma_M_contig3812.12665.1	Ec-23_002380.1
OG0000492	TRUE	prot_D-dichotoma_M_contig2345.7959.1	Ec-01_012200.1,Ec-01_012250.1
OG0000493	TRUE	prot_D-dichotoma_M_contig508.15458.1,prot_D-dichotoma_M_contig508.15460.1	Ec-06_001150.1
OG0000494	TRUE	prot_D-dichotoma_M_contig510.15492.1	Ec-00_009890.1,Ec-20_003850.1
OG0000495	TRUE	prot_D-dichotoma_M_contig365.12263.1	Ec-09_000200.1,Ec-09_000260.1
OG0000496	TRUE	prot_D-dichotoma_M_contig192.5871.1	Ec-07_002430.1,Ec-07_002440.1
OG0000497	TRUE	prot_D-dichotoma_M_contig2733.9442.1	Ec-27_005477.1,Ec-27_005480.1
OG0000498	TRUE	prot_D-dichotoma_M_contig2734.9443.1,prot_D-dichotoma_M_contig3946.12994.1	Ec-18_002060.1
OG0000499	TRUE	prot_D-dichotoma_M_contig115.1241.1,prot_D-dichotoma_M_contig115.1243.1	Ec-17_003820.1
OG0000500	TRUE	prot_D-dichotoma_M_contig185.5506.1,prot_D-dichotoma_M_contig3854.12759.1	Ec-01_011190.1
OG0000501	TRUE	prot_D-dichotoma_M_contig185.5513.1	Ec-01_011370.1,Ec-01_011400.1
OG0000502	TRUE	prot_D-dichotoma_M_contig1183.1475.1,prot_D-dichotoma_M_contig446.14192.1	Ec-23_001980.1
OG0000503	TRUE	prot_D-dichotoma_M_contig2002.6330.1,prot_D-dichotoma_M_contig3935.12976.1	Ec-23_003210.1
OG0000504	TRUE	prot_D-dichotoma_M_contig402.13211.1	Ec-01_009000.1,Ec-01_011000.1
OG0000505	TRUE	prot_D-dichotoma_M_contig404.13257.1	Ec-18_003780.1,Ec-18_003810.1
OG0000506	TRUE	prot_D-dichotoma_M_contig516.15588.1	Ec-09_004450.1,Ec-19_001920.1
OG0000507	TRUE	prot_D-dichotoma_M_contig1543.3833.1	Ec-10_002410.1,Ec-22_003740.1
OG0000508	TRUE	prot_D-dichotoma_M_contig289.9976.1	Ec-25_002010.1,Ec-25_002020.1
OG0000509	TRUE	prot_D-dichotoma_M_contig594.16800.1	Ec-12_006650.1,Ec-26_000660.1
OG0000510	TRUE	prot_D-dichotoma_M_contig133.2529.1,prot_D-dichotoma_M_contig28.9663.1	Ec-23_003770.1
OG0000511	TRUE	prot_D-dichotoma_M_contig2627.9050.1,prot_D-dichotoma_M_contig28.9680.1	Ec-23_001300.1
OG0000512	TRUE	prot_D-dichotoma_M_contig581.16652.1	Ec-15_001910.1,Ec-15_001970.1
OG0000513	TRUE	prot_D-dichotoma_M_contig1057.527.1	Ec-10_003960.1,Ec-10_003980.1
OG0000514	TRUE	prot_D-dichotoma_M_contig306.10599.1	Ec-00_000070.1,Ec-00_007670.1
OG0000515	TRUE	prot_D-dichotoma_M_contig1114.973.1,prot_D-dichotoma_M_contig478.14837.1	Ec-01_008200.1
OG0000516	TRUE	prot_D-dichotoma_M_contig277.9547.1	Ec-07_005700.1,Ec-07_005810.1
OG0000517	TRUE	prot_D-dichotoma_M_contig500.15317.1,prot_D-dichotoma_M_contig500.15320.1	Ec-09_002160.1
OG0000518	TRUE	prot_D-dichotoma_M_contig180.5305.1	Ec-07_002800.1,Ec-07_002830.1
OG0000519	TRUE	prot_D-dichotoma_M_contig2365.8036.1	Ec-00_002680.1,Ec-15_003720.1
OG0000520	TRUE	prot_D-dichotoma_M_contig3150.10900.1	Ec-05_005450.1,Ec-05_005460.1
OG0000521	TRUE	prot_D-dichotoma_M_contig3156.10913.1	Ec-14_005010.1,Ec-14_005050.1
OG0000522	TRUE	prot_D-dichotoma_M_contig847.19269.1	Ec-22_001940.1,Ec-22_001950.1
OG0000523	TRUE	prot_D-dichotoma_M_contig795.18771.1	Ec-07_001150.1,Ec-07_001160.1
OG0000524	TRUE	prot_D-dichotoma_M_contig1081.707.1	Ec-10_002170.1,Ec-15_000660.1
OG0000525	TRUE	prot_D-dichotoma_M_contig89.19659.1	Ec-04_002670.1,Ec-28_002270.1
OG0000526	TRUE	prot_D-dichotoma_M_contig1855.5538.1	Ec-02_000390.1,Ec-02_000410.1
OG0000527	TRUE	prot_D-dichotoma_M_contig3527.11940.1	Ec-09_001090.1,Ec-11_001180.1
OG0000528	TRUE	prot_D-dichotoma_M_contig64.17352.1	Ec-04_001060.1,Ec-04_001070.1
OG0000529	TRUE	prot_D-dichotoma_M_contig421.13686.1	Ec-01_010720.1,Ec-09_001270.1
OG0000530	TRUE	prot_D-dichotoma_M_contig422.13708.1	Ec-27_004260.1,Ec-27_004270.1
OG0000531	TRUE	prot_D-dichotoma_M_contig3211.11099.1	Ec-11_005070.1,Ec-11_005100.1
OG0000532	TRUE	prot_D-dichotoma_M_contig6.16856.1	Ec-13_001490.1,Ec-13_001930.1
OG0000533	TRUE	prot_D-dichotoma_M_contig2460.8443.1	Ec-05_003680.1,Ec-27_005900.1
OG0000534	TRUE	prot_D-dichotoma_M_contig3102.10752.1,prot_D-dichotoma_M_contig3634.12221.1	Ec-06_000070.1
OG0000535	TRUE	prot_D-dichotoma_M_contig731.18185.1	Ec-04_003480.1,Ec-04_003540.1
OG0000536	TRUE	prot_D-dichotoma_M_contig145.3297.1	Ec-22_001510.1,Ec-22_001540.1
OG0000537	TRUE	prot_D-dichotoma_M_contig708.17983.1	Ec-03_002160.1,Ec-03_002170.1
OG0000538	TRUE	prot_D-dichotoma_M_contig708.17985.1	Ec-03_003120.1,Ec-03_003130.1
OG0000539	TRUE	prot_D-dichotoma_M_contig1883.5680.1,prot_D-dichotoma_M_contig4655.14600.1	Ec-08_003210.1
OG0000540	TRUE	prot_D-dichotoma_M_contig485.14979.1	Ec-01_007200.1,Ec-01_007230.1
OG0000541	TRUE	prot_D-dichotoma_M_contig67.17609.1	Ec-23_001500.1,Ec-23_001520.1
OG0000542	TRUE	prot_D-dichotoma_M_contig12.1612.1	Ec-12_005530.1,Ec-12_005560.1
OG0000543	TRUE	prot_D-dichotoma_M_contig131.2404.1	Ec-00_007220.1,Ec-19_001830.1
OG0000544	TRUE	prot_D-dichotoma_M_contig260.8981.1,prot_D-dichotoma_M_contig260.8982.1	Ec-22_002410.1
OG0000545	TRUE	prot_D-dichotoma_M_contig1243.1922.1,prot_D-dichotoma_M_contig1243.1923.1	Ec-25_001310.1
OG0000546	TRUE	prot_D-dichotoma_M_contig104.416.1	Ec-00_002780.1,Ec-05_003510.1
OG0000547	TRUE	prot_D-dichotoma_M_contig54.15992.1	Ec-00_001910.1,Ec-00_001930.1
OG0000548	TRUE	prot_D-dichotoma_M_contig54.15994.1,prot_D-dichotoma_M_contig54.15996.1	Ec-25_001410.1
OG0000549	TRUE	prot_D-dichotoma_M_contig126.2025.1	Ec-06_010510.1,Ec-06_010520.1
OG0000550	TRUE	prot_D-dichotoma_M_contig102.269.1,prot_D-dichotoma_M_contig102.270.1	Ec-10_005190.1
OG0000551	TRUE	prot_D-dichotoma_M_contig642.17376.1	Ec-07_001860.1,Ec-07_001890.1
OG0000552	TRUE	prot_D-dichotoma_M_contig231.7822.1,prot_D-dichotoma_M_contig231.7824.1	Ec-04_004280.1
OG0000553	TRUE	prot_D-dichotoma_M_contig451.14319.1	Ec-01_009270.1,Ec-01_009280.1
OG0000554	TRUE	prot_D-dichotoma_M_contig106.564.1,prot_D-dichotoma_M_contig106.570.1	Ec-02_004160.1
OG0000555	TRUE	prot_D-dichotoma_M_contig1708.4824.1	Ec-12_004530.1,Ec-12_004550.1
OG0000556	TRUE	prot_D-dichotoma_M_contig948.20197.1	Ec-12_006400.1,Ec-12_006600.1
OG0000557	TRUE	prot_D-dichotoma_M_contig2678.9236.1	Ec-16_001410.1,Ec-sdr_f_000190.1
OG0000558	TRUE	prot_D-dichotoma_M_contig1101.902.1	Ec-23_002830.1,Ec-23_002850.1
OG0000559	TRUE	prot_D-dichotoma_M_contig25.8585.1	Ec-13_001910.1,Ec-sdr_f_000010.1
OG0000560	TRUE	prot_D-dichotoma_M_contig956.20272.1	Ec-03_002510.1,Ec-05_002820.1
OG0000561	TRUE	prot_D-dichotoma_M_contig166.4573.1	Ec-16_000950.1,Ec-16_003710.1
OG0000562	TRUE	prot_D-dichotoma_M_contig168.4657.1	Ec-00_011010.1,Ec-06_003570.1
OG0000563	TRUE	prot_D-dichotoma_M_contig2119.6942.1	Ec-06_008060.1,Ec-12_004470.1
OG0000564	TRUE	prot_D-dichotoma_M_contig979.20448.1	Ec-01_001780.1,Ec-22_001390.1
OG0000565	TRUE	prot_D-dichotoma_M_contig1212.1713.1	Ec-13_001830.1,Ec-sdr_f_000080.1
OG0000566	TRUE	prot_D-dichotoma_M_contig427.13806.1	Ec-13_001840.1,Ec-sdr_f_000170.1
OG0000567	TRUE	prot_D-dichotoma_M_contig1483.3473.1	Ec-28_003000.1,Ec-28_003040.1
OG0000568	TRUE	prot_D-dichotoma_M_contig435.13988.1	Ec-20_000210.1,Ec-20_000230.1
OG0000569	TRUE	prot_D-dichotoma_M_contig1197.1577.1,prot_D-dichotoma_M_contig1197.1578.1	Ec-00_003490.1
OG0000570	TRUE	prot_D-dichotoma_M_contig1294.2241.1	Ec-01_012100.1,Ec-05_005600.1
OG0000571	TRUE	prot_D-dichotoma_M_contig15.3570.1,prot_D-dichotoma_M_contig3823.12692.1	Ec-01_005560.1
OG0000572	TRUE	prot_D-dichotoma_M_contig3125.10811.1	Ec-15_000620.1,Ec-15_000630.1
OG0000573	TRUE	prot_D-dichotoma_M_contig3140.10865.1	Ec-00_011250.1,Ec-03_000530.1
OG0000574	TRUE	prot_D-dichotoma_M_contig2697.9293.1	Ec-05_003340.1,Ec-05_003400.1
OG0000575	TRUE	prot_D-dichotoma_M_contig2965.10241.1	Ec-28_002520.1,Ec-28_002560.1
OG0000576	TRUE	prot_D-dichotoma_M_contig1350.2650.1,prot_D-dichotoma_M_contig2971.10267.1	Ec-11_001430.1
OG0000577	TRUE	prot_D-dichotoma_M_contig2821.9762.1	Ec-00_009440.1,Ec-03_001820.1
OG0000578	TRUE	prot_D-dichotoma_M_contig4980.15222.1	Ec-15_004990.1,Ec-25_000170.1
OG0000579	TRUE	prot_D-dichotoma_M_contig349.11838.1	Ec-17_003080.1,Ec-17_004080.1
OG0000580	TRUE	prot_D-dichotoma_M_contig1886.5686.1,prot_D-dichotoma_M_contig3550.12002.1	Ec-06_005140.1
OG0000581	TRUE	prot_D-dichotoma_M_contig1888.5692.1,prot_D-dichotoma_M_contig1888.5694.1	Ec-16_002010.1
OG0000582	TRUE	prot_D-dichotoma_M_contig3.10376.1,prot_D-dichotoma_M_contig3.10381.1	Ec-06_009600.1
OG0000583	TRUE	prot_D-dichotoma_M_contig406.13307.1	Ec-17_000430.1,Ec-17_000440.1
OG0000584	TRUE	prot_D-dichotoma_M_contig448.14224.1	Ec-21_002980.1,Ec-21_002990.1
OG0000585	TRUE	prot_D-dichotoma_M_contig3821.12688.1	Ec-00_008790.1,Ec-15_004320.1
OG0000586	TRUE	prot_D-dichotoma_M_contig408.13353.1,prot_D-dichotoma_M_contig408.13358.1	Ec-27_000210.1
OG0000587	TRUE	prot_D-dichotoma_M_contig408.13355.1,prot_D-dichotoma_M_contig408.13357.1	Ec-27_000220.1
OG0000588	TRUE	prot_D-dichotoma_M_contig1424.3118.1	Ec-06_002520.1,Ec-09_003670.1
OG0000589	TRUE	prot_D-dichotoma_M_contig627.17163.1,prot_D-dichotoma_M_contig627.17165.1	Ec-11_004820.1
OG0000590	TRUE	prot_D-dichotoma_M_contig3366.11510.1	Ec-01_006200.1,Ec-01_006270.1
OG0000591	TRUE	prot_D-dichotoma_M_contig985.20497.1	Ec-07_001620.1,Ec-07_001630.1
OG0000592	TRUE	prot_D-dichotoma_M_contig275.9480.1	Ec-12_008530.1,Ec-22_002310.1
OG0000593	TRUE	prot_D-dichotoma_M_contig312.10795.1	Ec-07_000890.1,Ec-07_000900.1
OG0000594	TRUE	prot_D-dichotoma_M_contig758.18411.1	Ec-03_004130.1,Ec-11_000340.1
OG0000595	TRUE	prot_D-dichotoma_M_contig759.18414.1	Ec-02_000900.1,Ec-24_001610.1
OG0000596	FALSE	NA	Ec-03_002980.1,Ec-11_004870.1,Ec-16_000300.1
OG0000597	FALSE	NA	Ec-13_000930.1,Ec-13_001100.1,Ec-26_004280.1
OG0000598	TRUE	prot_D-dichotoma_M_contig375.12517.1	Ec-20_000760.1
OG0000599	TRUE	prot_D-dichotoma_M_contig375.12520.1	Ec-20_000400.1
OG0000600	TRUE	prot_D-dichotoma_M_contig376.12543.1	Ec-09_001770.1
OG0000601	TRUE	prot_D-dichotoma_M_contig1232.1839.1	Ec-08_003770.1
OG0000602	TRUE	prot_D-dichotoma_M_contig1234.1853.1	Ec-08_004380.1
OG0000603	TRUE	prot_D-dichotoma_M_contig1235.1860.1	Ec-12_006140.1
OG0000604	TRUE	prot_D-dichotoma_M_contig368.12330.1	Ec-07_006390.1
OG0000605	TRUE	prot_D-dichotoma_M_contig369.12377.1	Ec-24_002590.1
OG0000606	TRUE	prot_D-dichotoma_M_contig475.14787.1	Ec-22_000880.1
OG0000607	TRUE	prot_D-dichotoma_M_contig10.41.1	Ec-08_003460.1
OG0000608	TRUE	prot_D-dichotoma_M_contig10.44.1	Ec-08_003480.1
OG0000609	TRUE	prot_D-dichotoma_M_contig556.16261.1	Ec-15_002800.1
OG0000610	TRUE	prot_D-dichotoma_M_contig719.18085.1	Ec-22_000420.1
OG0000611	TRUE	prot_D-dichotoma_M_contig719.18088.1	Ec-22_000150.1
OG0000612	TRUE	prot_D-dichotoma_M_contig2097.6816.1	Ec-02_000680.1
OG0000613	TRUE	prot_D-dichotoma_M_contig518.15628.1	Ec-28_000350.1
OG0000614	TRUE	prot_D-dichotoma_M_contig564.16396.1	Ec-09_004210.1
OG0000615	TRUE	prot_D-dichotoma_M_contig2927.10128.1	Ec-17_001960.1
OG0000616	TRUE	prot_D-dichotoma_M_contig2612.9014.1	Ec-17_004220.1
OG0000617	TRUE	prot_D-dichotoma_M_contig2619.9028.1	Ec-22_000540.1
OG0000618	TRUE	prot_D-dichotoma_M_contig100.99.1	Ec-12_007580.1
OG0000619	TRUE	prot_D-dichotoma_M_contig695.17825.1	Ec-21_001580.1
OG0000620	TRUE	prot_D-dichotoma_M_contig695.17828.1	Ec-21_001670.1
OG0000621	TRUE	prot_D-dichotoma_M_contig697.17839.1	Ec-22_002980.1
OG0000622	TRUE	prot_D-dichotoma_M_contig686.17737.1	Ec-24_002730.1
OG0000623	TRUE	prot_D-dichotoma_M_contig108.694.1	Ec-20_004730.1
OG0000624	TRUE	prot_D-dichotoma_M_contig599.16844.1	Ec-09_004520.1
OG0000625	TRUE	prot_D-dichotoma_M_contig599.16846.1	Ec-09_004470.1
OG0000626	TRUE	prot_D-dichotoma_M_contig318.10972.1	Ec-07_002010.1
OG0000627	TRUE	prot_D-dichotoma_M_contig320.11065.1	Ec-26_003760.1
OG0000628	TRUE	prot_D-dichotoma_M_contig2231.7461.1	Ec-05_005260.1
OG0000629	TRUE	prot_D-dichotoma_M_contig252.8678.1	Ec-24_000020.1
OG0000630	TRUE	prot_D-dichotoma_M_contig1119.1013.1	Ec-04_000710.1
OG0000631	TRUE	prot_D-dichotoma_M_contig1120.1037.1	Ec-01_005960.1
OG0000632	TRUE	prot_D-dichotoma_M_contig3449.11712.1	Ec-07_006800.1
OG0000633	TRUE	prot_D-dichotoma_M_contig1324.2497.1	Ec-28_001420.1
OG0000634	TRUE	prot_D-dichotoma_M_contig1.19.1	Ec-05_000680.1
OG0000635	TRUE	prot_D-dichotoma_M_contig1.27.1	Ec-00_008290.1
OG0000636	TRUE	prot_D-dichotoma_M_contig890.19670.1	Ec-12_006570.1
OG0000637	TRUE	prot_D-dichotoma_M_contig1689.4700.1	Ec-07_001770.1
OG0000638	TRUE	prot_D-dichotoma_M_contig2603.8990.1	Ec-19_004730.1
OG0000639	TRUE	prot_D-dichotoma_M_contig31.10718.1	Ec-15_000760.1
OG0000640	TRUE	prot_D-dichotoma_M_contig736.18213.1	Ec-03_001320.1
OG0000641	TRUE	prot_D-dichotoma_M_contig738.18227.1	Ec-20_004580.1
OG0000642	TRUE	prot_D-dichotoma_M_contig1619.4328.1	Ec-04_004000.1
OG0000643	TRUE	prot_D-dichotoma_M_contig1963.6074.1	Ec-10_003220.1
OG0000644	TRUE	prot_D-dichotoma_M_contig2.6264.1	Ec-12_005080.1
OG0000645	TRUE	prot_D-dichotoma_M_contig327.11241.1	Ec-17_004140.1
OG0000646	TRUE	prot_D-dichotoma_M_contig1498.3557.1	Ec-06_007630.1
OG0000647	TRUE	prot_D-dichotoma_M_contig496.15191.1	Ec-11_006180.1
OG0000648	TRUE	prot_D-dichotoma_M_contig498.15212.1	Ec-14_002490.1
OG0000649	TRUE	prot_D-dichotoma_M_contig1563.3947.1	Ec-03_002140.1
OG0000650	TRUE	prot_D-dichotoma_M_contig1605.4229.1	Ec-24_000990.1
OG0000651	TRUE	prot_D-dichotoma_M_contig339.11555.1	Ec-23_001040.1
OG0000652	TRUE	prot_D-dichotoma_M_contig155.3871.1	Ec-23_000070.1
OG0000653	TRUE	prot_D-dichotoma_M_contig1353.2666.1	Ec-09_004300.1
OG0000654	TRUE	prot_D-dichotoma_M_contig43.13870.1	Ec-21_005720.1
OG0000655	TRUE	prot_D-dichotoma_M_contig534.15899.1	Ec-27_004730.1
OG0000656	TRUE	prot_D-dichotoma_M_contig534.15912.1	Ec-27_004720.1
OG0000657	TRUE	prot_D-dichotoma_M_contig1633.4418.1	Ec-16_004460.1
OG0000658	TRUE	prot_D-dichotoma_M_contig997.20570.1	Ec-27_006630.1
OG0000659	TRUE	prot_D-dichotoma_M_contig7.17874.1	Ec-10_001040.1
OG0000660	TRUE	prot_D-dichotoma_M_contig165.4498.1	Ec-07_003120.1
OG0000661	TRUE	prot_D-dichotoma_M_contig1822.5398.1	Ec-27_004850.1
OG0000662	TRUE	prot_D-dichotoma_M_contig1249.1949.1	Ec-12_008660.1
OG0000663	TRUE	prot_D-dichotoma_M_contig1253.1978.1	Ec-21_002880.1
OG0000664	TRUE	prot_D-dichotoma_M_contig1253.1981.1	Ec-21_003100.1
OG0000665	TRUE	prot_D-dichotoma_M_contig238.8114.1	Ec-15_000800.1
OG0000666	TRUE	prot_D-dichotoma_M_contig938.20109.1	Ec-18_004180.1
OG0000667	TRUE	prot_D-dichotoma_M_contig862.19397.1	Ec-17_002360.1
OG0000668	TRUE	prot_D-dichotoma_M_contig713.18036.1	Ec-20_001360.1
OG0000669	TRUE	prot_D-dichotoma_M_contig2039.6509.1	Ec-18_000710.1
OG0000670	TRUE	prot_D-dichotoma_M_contig617.17061.1	Ec-25_003140.1
OG0000671	TRUE	prot_D-dichotoma_M_contig619.17079.1	Ec-26_000760.1
OG0000672	TRUE	prot_D-dichotoma_M_contig292.10104.1	Ec-07_000160.1
OG0000673	TRUE	prot_D-dichotoma_M_contig623.17138.1	Ec-18_003610.1
OG0000674	TRUE	prot_D-dichotoma_M_contig118.1456.1	Ec-08_004770.1
OG0000675	TRUE	prot_D-dichotoma_M_contig1375.2770.1	Ec-26_001160.1
OG0000676	TRUE	prot_D-dichotoma_M_contig728.18161.1	Ec-21_004280.1
OG0000677	TRUE	prot_D-dichotoma_M_contig730.18183.1	Ec-05_006240.1
OG0000678	TRUE	prot_D-dichotoma_M_contig1639.4439.1	Ec-26_003820.1
OG0000679	TRUE	prot_D-dichotoma_M_contig2207.7374.1	Ec-17_000180.1
OG0000680	TRUE	prot_D-dichotoma_M_contig2193.7288.1	Ec-07_000680.1
OG0000681	TRUE	prot_D-dichotoma_M_contig537.15948.1	Ec-15_004500.1
OG0000682	TRUE	prot_D-dichotoma_M_contig1578.4012.1	Ec-11_000630.1
OG0000683	TRUE	prot_D-dichotoma_M_contig1583.4044.1	Ec-01_007460.1
OG0000684	TRUE	prot_D-dichotoma_M_contig1992.6214.1	Ec-13_004250.1
OG0000685	TRUE	prot_D-dichotoma_M_contig261.9008.1	Ec-15_002010.1
OG0000686	TRUE	prot_D-dichotoma_M_contig161.4268.1	Ec-01_004060.1
OG0000687	TRUE	prot_D-dichotoma_M_contig163.4394.1	Ec-15_000360.1
OG0000688	TRUE	prot_D-dichotoma_M_contig944.20165.1	Ec-07_006630.1
OG0000689	TRUE	prot_D-dichotoma_M_contig945.20172.1	Ec-10_006080.1
OG0000690	TRUE	prot_D-dichotoma_M_contig784.18674.1	Ec-18_000940.1
OG0000691	TRUE	prot_D-dichotoma_M_contig892.19688.1	Ec-19_005030.1
OG0000692	TRUE	prot_D-dichotoma_M_contig2763.9521.1	Ec-23_002520.1
OG0000693	TRUE	prot_D-dichotoma_M_contig95.20222.1	Ec-00_010220.1
OG0000694	TRUE	prot_D-dichotoma_M_contig96.20316.1	Ec-14_002690.1
OG0000695	TRUE	prot_D-dichotoma_M_contig97.20381.1	Ec-14_002550.1
OG0000696	TRUE	prot_D-dichotoma_M_contig3234.11164.1	Ec-15_004820.1
OG0000697	TRUE	prot_D-dichotoma_M_contig970.20401.1	Ec-27_006270.1
OG0000698	TRUE	prot_D-dichotoma_M_contig973.20421.1	Ec-12_002150.1
OG0000699	TRUE	prot_D-dichotoma_M_contig469.14654.1	Ec-02_000250.1
OG0000700	TRUE	prot_D-dichotoma_M_contig110.874.1	Ec-15_001500.1
OG0000701	TRUE	prot_D-dichotoma_M_contig400.13169.1	Ec-12_000630.1
OG0000702	TRUE	prot_D-dichotoma_M_contig72.18100.1	Ec-19_000890.1
OG0000703	TRUE	prot_D-dichotoma_M_contig1698.4749.1	Ec-03_004350.1
OG0000704	TRUE	prot_D-dichotoma_M_contig1239.1890.1	Ec-19_001560.1
OG0000705	TRUE	prot_D-dichotoma_M_contig458.14458.1	Ec-06_004290.1
OG0000706	TRUE	prot_D-dichotoma_M_contig459.14475.1	Ec-08_000870.1
OG0000707	TRUE	prot_D-dichotoma_M_contig2901.10041.1	Ec-01_000710.1
OG0000708	TRUE	prot_D-dichotoma_M_contig2911.10077.1	Ec-25_002040.1
OG0000709	TRUE	prot_D-dichotoma_M_contig2912.10083.1	Ec-17_003460.1
OG0000710	TRUE	prot_D-dichotoma_M_contig1148.1217.1	Ec-03_001400.1
OG0000711	TRUE	prot_D-dichotoma_M_contig2382.8120.1	Ec-14_000410.1
OG0000712	TRUE	prot_D-dichotoma_M_contig555.16234.1	Ec-06_008080.1
OG0000713	TRUE	prot_D-dichotoma_M_contig295.10189.1	Ec-10_000800.1
OG0000714	TRUE	prot_D-dichotoma_M_contig673.17644.1	Ec-00_006780.1
OG0000715	TRUE	prot_D-dichotoma_M_contig700.17913.1	Ec-18_000720.1
OG0000716	TRUE	prot_D-dichotoma_M_contig3076.10633.1	Ec-27_003990.1
OG0000717	TRUE	prot_D-dichotoma_M_contig360.12138.1	Ec-27_005200.1
OG0000718	TRUE	prot_D-dichotoma_M_contig361.12167.1	Ec-05_002770.1
OG0000719	TRUE	prot_D-dichotoma_M_contig19.5742.1	Ec-07_004310.1
OG0000720	TRUE	prot_D-dichotoma_M_contig590.16761.1	Ec-16_000625.1
OG0000721	TRUE	prot_D-dichotoma_M_contig333.11430.1	Ec-21_004410.1
OG0000722	TRUE	prot_D-dichotoma_M_contig2285.7689.1	Ec-13_004580.1
OG0000723	TRUE	prot_D-dichotoma_M_contig2285.7690.1	Ec-13_004570.1
OG0000724	TRUE	prot_D-dichotoma_M_contig1866.5589.1	Ec-24_001850.1
OG0000725	TRUE	prot_D-dichotoma_M_contig1866.5590.1	Ec-00_000880.1
OG0000726	TRUE	prot_D-dichotoma_M_contig1449.3277.1	Ec-04_000510.1
OG0000727	TRUE	prot_D-dichotoma_M_contig14.2948.1	Ec-24_002020.1
OG0000728	TRUE	prot_D-dichotoma_M_contig14.2951.1	Ec-24_002900.1
OG0000729	TRUE	prot_D-dichotoma_M_contig87.19466.1	Ec-16_002670.1
OG0000730	TRUE	prot_D-dichotoma_M_contig87.19467.1	Ec-16_002660.1
OG0000731	TRUE	prot_D-dichotoma_M_contig88.19561.1	Ec-22_000720.1
OG0000732	TRUE	prot_D-dichotoma_M_contig8.18855.1	Ec-08_001950.1
OG0000733	TRUE	prot_D-dichotoma_M_contig2029.6459.1	Ec-02_000060.1
OG0000734	TRUE	prot_D-dichotoma_M_contig2029.6462.1	Ec-02_000100.1
OG0000735	TRUE	prot_D-dichotoma_M_contig1310.2411.1	Ec-02_003960.1
OG0000736	TRUE	prot_D-dichotoma_M_contig1310.2413.1	Ec-02_003980.1
OG0000737	TRUE	prot_D-dichotoma_M_contig2899.10000.1	Ec-05_002850.1
OG0000738	TRUE	prot_D-dichotoma_M_contig2710.9372.1	Ec-00_000140.1
OG0000739	TRUE	prot_D-dichotoma_M_contig2713.9382.1	Ec-06_004100.1
OG0000740	TRUE	prot_D-dichotoma_M_contig465.14591.1	Ec-20_001940.1
OG0000741	TRUE	prot_D-dichotoma_M_contig857.19340.1	Ec-09_003540.1
OG0000742	TRUE	prot_D-dichotoma_M_contig857.19343.1	Ec-09_003580.1
OG0000743	TRUE	prot_D-dichotoma_M_contig858.19354.1	Ec-16_002090.1
OG0000744	TRUE	prot_D-dichotoma_M_contig858.19357.1	Ec-00_004560.1
OG0000745	TRUE	prot_D-dichotoma_M_contig1088.757.1	Ec-27_002920.1
OG0000746	TRUE	prot_D-dichotoma_M_contig1091.802.1	Ec-20_001170.1
OG0000747	TRUE	prot_D-dichotoma_M_contig1085.734.1	Ec-09_004330.1
OG0000748	TRUE	prot_D-dichotoma_M_contig2307.7809.1	Ec-26_003180.1
OG0000749	TRUE	prot_D-dichotoma_M_contig201.6375.1	Ec-04_002230.1
OG0000750	TRUE	prot_D-dichotoma_M_contig201.6381.1	Ec-04_001700.1
OG0000751	TRUE	prot_D-dichotoma_M_contig143.3147.1	Ec-16_000270.1
OG0000752	TRUE	prot_D-dichotoma_M_contig176.5075.1	Ec-01_001420.1
OG0000753	TRUE	prot_D-dichotoma_M_contig177.5124.1	Ec-13_001530.1
OG0000754	TRUE	prot_D-dichotoma_M_contig511.15522.1	Ec-15_000310.1
OG0000755	TRUE	prot_D-dichotoma_M_contig513.15548.1	Ec-02_000360.1
OG0000756	TRUE	prot_D-dichotoma_M_contig36.12119.1	Ec-27_001780.1
OG0000757	TRUE	prot_D-dichotoma_M_contig138.2804.1	Ec-21_003490.1
OG0000758	TRUE	prot_D-dichotoma_M_contig94.20124.1	Ec-26_001270.1
OG0000759	TRUE	prot_D-dichotoma_M_contig1210.1702.1	Ec-27_006470.1
OG0000760	TRUE	prot_D-dichotoma_M_contig462.14551.1	Ec-19_000190.1
OG0000761	TRUE	prot_D-dichotoma_M_contig22.7309.1	Ec-09_002190.1
OG0000762	TRUE	prot_D-dichotoma_M_contig3319.11401.1	Ec-28_003050.1
OG0000763	TRUE	prot_D-dichotoma_M_contig59.16752.1	Ec-03_004890.1
OG0000764	TRUE	prot_D-dichotoma_M_contig59.16756.1	Ec-03_004930.1
OG0000765	TRUE	prot_D-dichotoma_M_contig174.4980.1	Ec-28_003150.1
OG0000766	TRUE	prot_D-dichotoma_M_contig175.5029.1	Ec-08_004810.1
OG0000767	TRUE	prot_D-dichotoma_M_contig175.5039.1	Ec-08_004690.1
OG0000768	TRUE	prot_D-dichotoma_M_contig50.15305.1	Ec-09_001300.1
OG0000769	TRUE	prot_D-dichotoma_M_contig1502.3609.1	Ec-21_001830.1
OG0000770	TRUE	prot_D-dichotoma_M_contig484.14963.1	Ec-07_006510.1
OG0000771	TRUE	prot_D-dichotoma_M_contig1785.5191.1	Ec-14_005610.1
OG0000772	TRUE	prot_D-dichotoma_M_contig1168.1371.1	Ec-06_007400.1
OG0000773	TRUE	prot_D-dichotoma_M_contig523.15720.1	Ec-22_000690.1
OG0000774	TRUE	prot_D-dichotoma_M_contig524.15738.1	Ec-23_000170.1
OG0000775	TRUE	prot_D-dichotoma_M_contig2066.6635.1	Ec-20_001440.1
OG0000776	TRUE	prot_D-dichotoma_M_contig1608.4247.1	Ec-27_006670.1
OG0000777	TRUE	prot_D-dichotoma_M_contig1609.4257.1	Ec-01_010070.1
OG0000778	TRUE	prot_D-dichotoma_M_contig927.19996.1	Ec-14_001450.1
OG0000779	TRUE	prot_D-dichotoma_M_contig927.19998.1	Ec-14_001410.1
OG0000780	TRUE	prot_D-dichotoma_M_contig2345.7957.1	Ec-01_010060.1
OG0000781	TRUE	prot_D-dichotoma_M_contig2349.7977.1	Ec-19_004720.1
OG0000782	TRUE	prot_D-dichotoma_M_contig1556.3900.1	Ec-20_003170.1
OG0000783	TRUE	prot_D-dichotoma_M_contig1557.3902.1	Ec-07_006590.1
OG0000784	TRUE	prot_D-dichotoma_M_contig18.5263.1	Ec-26_004400.1
OG0000785	TRUE	prot_D-dichotoma_M_contig18.5279.1	Ec-26_002060.1
OG0000786	TRUE	prot_D-dichotoma_M_contig192.5866.1	Ec-07_002500.1
OG0000787	TRUE	prot_D-dichotoma_M_contig1869.5605.1	Ec-26_000520.1
OG0000788	TRUE	prot_D-dichotoma_M_contig27.9300.1	Ec-13_000490.1
OG0000789	TRUE	prot_D-dichotoma_M_contig611.16998.1	Ec-14_002300.1
OG0000790	TRUE	prot_D-dichotoma_M_contig322.11122.1	Ec-10_003680.1
OG0000791	TRUE	prot_D-dichotoma_M_contig185.5511.1	Ec-01_011250.1
OG0000792	TRUE	prot_D-dichotoma_M_contig186.5551.1	Ec-05_003970.1
OG0000793	TRUE	prot_D-dichotoma_M_contig172.4892.1	Ec-04_004380.1
OG0000794	TRUE	prot_D-dichotoma_M_contig2402.8222.1	Ec-16_002470.1
OG0000795	TRUE	prot_D-dichotoma_M_contig85.19292.1	Ec-14_001120.1
OG0000796	TRUE	prot_D-dichotoma_M_contig85.19296.1	Ec-14_001140.1
OG0000797	TRUE	prot_D-dichotoma_M_contig4791.14857.1	Ec-01_005400.1
OG0000798	TRUE	prot_D-dichotoma_M_contig401.13193.1	Ec-14_002430.1
OG0000799	TRUE	prot_D-dichotoma_M_contig287.9908.1	Ec-11_005730.1
OG0000800	TRUE	prot_D-dichotoma_M_contig289.9978.1	Ec-25_002770.1
OG0000801	TRUE	prot_D-dichotoma_M_contig28.9667.1	Ec-23_002260.1
OG0000802	TRUE	prot_D-dichotoma_M_contig310.10740.1	Ec-27_003690.1
OG0000803	TRUE	prot_D-dichotoma_M_contig1280.2144.1	Ec-20_002950.1
OG0000804	TRUE	prot_D-dichotoma_M_contig1285.2179.1	Ec-02_003140.1
OG0000805	TRUE	prot_D-dichotoma_M_contig1055.519.1	Ec-26_001490.1
OG0000806	TRUE	prot_D-dichotoma_M_contig2979.10287.1	Ec-11_002240.1
OG0000807	TRUE	prot_D-dichotoma_M_contig480.14876.1	Ec-04_002710.1
OG0000808	TRUE	prot_D-dichotoma_M_contig352.11925.1	Ec-00_011240.1
OG0000809	TRUE	prot_D-dichotoma_M_contig148.3450.1	Ec-06_000670.1
OG0000810	TRUE	prot_D-dichotoma_M_contig502.15341.1	Ec-14_003180.1
OG0000811	TRUE	prot_D-dichotoma_M_contig502.15348.1	Ec-14_003100.1
OG0000812	TRUE	prot_D-dichotoma_M_contig180.5310.1	Ec-07_002860.1
OG0000813	TRUE	prot_D-dichotoma_M_contig17.4764.1	Ec-07_004100.1
OG0000814	TRUE	prot_D-dichotoma_M_contig3158.10916.1	Ec-00_001540.1
OG0000815	TRUE	prot_D-dichotoma_M_contig300.10419.1	Ec-27_004400.1
OG0000816	TRUE	prot_D-dichotoma_M_contig89.19653.1	Ec-28_001970.1
OG0000817	TRUE	prot_D-dichotoma_M_contig1851.5524.1	Ec-07_000880.1
OG0000818	TRUE	prot_D-dichotoma_M_contig3528.11941.1	Ec-22_003550.1
OG0000819	TRUE	prot_D-dichotoma_M_contig65.17434.1	Ec-14_006060.1
OG0000820	TRUE	prot_D-dichotoma_M_contig421.13683.1	Ec-01_009930.1
OG0000821	TRUE	prot_D-dichotoma_M_contig3249.11194.1	Ec-15_001710.1
OG0000822	TRUE	prot_D-dichotoma_M_contig3252.11207.1	Ec-18_000780.1
OG0000823	TRUE	prot_D-dichotoma_M_contig2150.7121.1	Ec-26_003410.1
OG0000824	TRUE	prot_D-dichotoma_M_contig3204.11078.1	Ec-01_004420.1
OG0000825	TRUE	prot_D-dichotoma_M_contig2146.7093.1	Ec-12_000750.1
OG0000826	TRUE	prot_D-dichotoma_M_contig145.3299.1	Ec-14_002180.1
OG0000827	TRUE	prot_D-dichotoma_M_contig704.17938.1	Ec-22_003890.1
OG0000828	TRUE	prot_D-dichotoma_M_contig211.6907.1	Ec-01_004130.1
OG0000829	TRUE	prot_D-dichotoma_M_contig2447.8394.1	Ec-16_001910.1
OG0000830	TRUE	prot_D-dichotoma_M_contig62.17089.1	Ec-03_000960.1
OG0000831	TRUE	prot_D-dichotoma_M_contig445.14177.1	Ec-01_001250.1
OG0000832	TRUE	prot_D-dichotoma_M_contig49.15079.1	Ec-14_004850.1
OG0000833	TRUE	prot_D-dichotoma_M_contig5.15256.1	Ec-11_005400.1
OG0000834	TRUE	prot_D-dichotoma_M_contig131.2405.1	Ec-19_001860.1
OG0000835	TRUE	prot_D-dichotoma_M_contig84.19205.1	Ec-05_004630.1
OG0000836	TRUE	prot_D-dichotoma_M_contig259.8922.1	Ec-26_005210.1
OG0000837	TRUE	prot_D-dichotoma_M_contig58.16603.1	Ec-01_004220.1
OG0000838	TRUE	prot_D-dichotoma_M_contig58.16611.1	Ec-01_004670.1
OG0000839	TRUE	prot_D-dichotoma_M_contig925.19982.1	Ec-17_003710.1
OG0000840	TRUE	prot_D-dichotoma_M_contig105.486.1	Ec-04_004440.1
OG0000841	TRUE	prot_D-dichotoma_M_contig1748.5021.1	Ec-06_007590.1
OG0000842	TRUE	prot_D-dichotoma_M_contig126.2026.1	Ec-06_010540.1
OG0000843	TRUE	prot_D-dichotoma_M_contig1153.1265.1	Ec-13_000440.1
OG0000844	TRUE	prot_D-dichotoma_M_contig103.331.1	Ec-07_007540.1
OG0000845	TRUE	prot_D-dichotoma_M_contig103.337.1	Ec-07_007320.1
OG0000846	TRUE	prot_D-dichotoma_M_contig641.17364.1	Ec-11_004350.1
OG0000847	TRUE	prot_D-dichotoma_M_contig231.7825.1	Ec-04_004270.1
OG0000848	TRUE	prot_D-dichotoma_M_contig196.6055.1	Ec-17_003270.1
OG0000849	TRUE	prot_D-dichotoma_M_contig452.14343.1	Ec-07_006320.1
OG0000850	TRUE	prot_D-dichotoma_M_contig452.14344.1	Ec-07_006310.1
OG0000851	TRUE	prot_D-dichotoma_M_contig271.9359.1	Ec-06_002910.1
OG0000852	TRUE	prot_D-dichotoma_M_contig5116.15531.1	Ec-12_003050.1
OG0000853	TRUE	prot_D-dichotoma_M_contig106.553.1	Ec-01_000380.1
OG0000854	TRUE	prot_D-dichotoma_M_contig1161.1326.1	Ec-23_002170.1
OG0000855	TRUE	prot_D-dichotoma_M_contig121.1691.1	Ec-04_006260.1
OG0000856	TRUE	prot_D-dichotoma_M_contig122.1769.1	Ec-24_001200.1
OG0000857	TRUE	prot_D-dichotoma_M_contig123.1814.1	Ec-07_005460.1
OG0000858	TRUE	prot_D-dichotoma_M_contig1681.4667.1	Ec-25_000580.1
OG0000859	TRUE	prot_D-dichotoma_M_contig1681.4671.1	Ec-00_008970.1
OG0000860	TRUE	prot_D-dichotoma_M_contig21.6841.1	Ec-25_001640.1
OG0000861	TRUE	prot_D-dichotoma_M_contig21.6842.1	Ec-25_001810.1
OG0000862	TRUE	prot_D-dichotoma_M_contig952.20239.1	Ec-01_010440.1
OG0000863	TRUE	prot_D-dichotoma_M_contig2677.9229.1	Ec-19_003560.1
OG0000864	TRUE	prot_D-dichotoma_M_contig2677.9234.1	Ec-19_003425.1
OG0000865	TRUE	prot_D-dichotoma_M_contig800.18879.1	Ec-08_001110.1
OG0000866	TRUE	prot_D-dichotoma_M_contig803.18896.1	Ec-06_010870.1
OG0000867	TRUE	prot_D-dichotoma_M_contig1100.892.1	Ec-15_002240.1
OG0000868	TRUE	prot_D-dichotoma_M_contig2000.6318.1	Ec-11_004930.1
OG0000869	TRUE	prot_D-dichotoma_M_contig2069.6640.1	Ec-26_001890.1
OG0000870	TRUE	prot_D-dichotoma_M_contig2073.6672.1	Ec-15_001020.1
OG0000871	TRUE	prot_D-dichotoma_M_contig3222.11137.1	Ec-05_006160.1
OG0000872	TRUE	prot_D-dichotoma_M_contig134.2581.1	Ec-03_005350.1
OG0000873	TRUE	prot_D-dichotoma_M_contig134.2583.1	Ec-03_005360.1
OG0000874	TRUE	prot_D-dichotoma_M_contig954.20257.1	Ec-27_003250.1
OG0000875	TRUE	prot_D-dichotoma_M_contig1824.5403.1	Ec-03_002340.1
OG0000876	TRUE	prot_D-dichotoma_M_contig2171.7207.1	Ec-26_002180.1
OG0000877	TRUE	prot_D-dichotoma_M_contig167.4605.1	Ec-02_005200.1
OG0000878	TRUE	prot_D-dichotoma_M_contig167.4615.1	Ec-02_005560.1
OG0000879	TRUE	prot_D-dichotoma_M_contig167.4617.1	Ec-02_005580.1
OG0000880	TRUE	prot_D-dichotoma_M_contig429.13841.1	Ec-00_011360.1
OG0000881	TRUE	prot_D-dichotoma_M_contig156.3916.1	Ec-21_003040.1
OG0000882	TRUE	prot_D-dichotoma_M_contig2337.7925.1	Ec-18_002100.1
OG0000883	TRUE	prot_D-dichotoma_M_contig1797.5238.1	Ec-07_004400.1
OG0000884	TRUE	prot_D-dichotoma_M_contig1430.3153.1	Ec-07_004170.1
OG0000885	TRUE	prot_D-dichotoma_M_contig1435.3188.1	Ec-12_007850.1
OG0000886	TRUE	prot_D-dichotoma_M_contig34.11584.1	Ec-15_004250.1
OG0000887	TRUE	prot_D-dichotoma_M_contig40.13153.1	Ec-01_004260.1
OG0000888	TRUE	prot_D-dichotoma_M_contig1303.2351.1	Ec-20_003270.1
OG0000889	TRUE	prot_D-dichotoma_M_contig882.19591.1	Ec-06_000250.1
OG0000890	TRUE	prot_D-dichotoma_M_contig886.19627.1	Ec-14_004190.1
OG0000891	TRUE	prot_D-dichotoma_M_contig1293.2239.1	Ec-05_001550.1
OG0000892	TRUE	prot_D-dichotoma_M_contig15.3569.1	Ec-01_005800.1
OG0000893	TRUE	prot_D-dichotoma_M_contig16.4157.1	Ec-21_005040.1
OG0000894	TRUE	prot_D-dichotoma_M_contig16.4162.1	Ec-21_006340.1
OG0000895	TRUE	prot_D-dichotoma_M_contig16.4163.1	Ec-21_006330.1
OG0000896	TRUE	prot_D-dichotoma_M_contig723.18120.1	Ec-00_002080.1
OG0000897	TRUE	prot_D-dichotoma_M_contig296.10220.1	Ec-06_010770.1
OG0000898	TRUE	prot_D-dichotoma_M_contig297.10255.1	Ec-02_002730.1
OG0000899	TRUE	prot_D-dichotoma_M_contig373.12475.1	Ec-11_001070.1
OG0000900	TRUE	prot_D-dichotoma_M_contig779.18630.1	Ec-02_001080.1
OG0000901	TRUE	prot_D-dichotoma_M_contig24.8195.1	Ec-03_002090.1
OG0000902	TRUE	prot_D-dichotoma_M_contig2825.9768.1	Ec-12_000180.1
OG0000903	TRUE	prot_D-dichotoma_M_contig1723.4907.1	Ec-20_000030.1
OG0000904	TRUE	prot_D-dichotoma_M_contig2865.9880.1	Ec-24_003720.1
OG0000905	TRUE	prot_D-dichotoma_M_contig1279.2137.1	Ec-03_002600.1
OG0000906	TRUE	prot_D-dichotoma_M_contig314.10852.1	Ec-00_002060.1
OG0000907	TRUE	prot_D-dichotoma_M_contig315.10884.1	Ec-01_010650.1
OG0000908	TRUE	prot_D-dichotoma_M_contig757.18397.1	Ec-23_001090.1
OG0000909	TRUE	prot_D-dichotoma_M_contig1890.5714.1	Ec-02_006410.1
OG0000910	TRUE	prot_D-dichotoma_M_contig282.9743.1	Ec-21_006050.1
OG0000911	TRUE	prot_D-dichotoma_M_contig282.9754.1	Ec-21_006030.1
OG0000912	TRUE	prot_D-dichotoma_M_contig874.19508.1	Ec-01_002110.1
OG0000913	TRUE	prot_D-dichotoma_M_contig1350.2656.1	Ec-16_001490.1
OG0000914	TRUE	prot_D-dichotoma_M_contig666.17581.1	Ec-20_002690.1
OG0000915	TRUE	prot_D-dichotoma_M_contig406.13310.1	Ec-17_000410.1
OG0000916	TRUE	prot_D-dichotoma_M_contig236.8015.1	Ec-00_001680.1
OG0000917	TRUE	prot_D-dichotoma_M_contig237.8050.1	Ec-27_002730.1
OG0000918	TRUE	prot_D-dichotoma_M_contig448.14227.1	Ec-21_002720.1
OG0000919	TRUE	prot_D-dichotoma_M_contig505.15410.1	Ec-28_002910.1
OG0000920	TRUE	prot_D-dichotoma_M_contig506.15423.1	Ec-26_005510.1
OG0000921	TRUE	prot_D-dichotoma_M_contig3460.11767.1	Ec-26_000860.1
OG0000922	TRUE	prot_D-dichotoma_M_contig3479.11788.1	Ec-23_000130.1
OG0000923	TRUE	prot_D-dichotoma_M_contig1906.5796.1	Ec-07_003430.1
OG0000924	TRUE	prot_D-dichotoma_M_contig1912.5843.1	Ec-14_001550.1
OG0000925	TRUE	prot_D-dichotoma_M_contig606.16944.1	Ec-08_001340.1
OG0000926	TRUE	prot_D-dichotoma_M_contig766.18518.1	Ec-17_004280.1
OG0000927	TRUE	prot_D-dichotoma_M_contig878.19538.1	Ec-10_000730.1
OG0000928	TRUE	prot_D-dichotoma_M_contig408.13363.1	Ec-27_000170.1
OG0000929	TRUE	prot_D-dichotoma_M_contig2628.9052.1	Ec-21_005800.1
OG0000930	TRUE	prot_D-dichotoma_M_contig140.2977.1	Ec-20_004510.1
OG0000931	TRUE	prot_D-dichotoma_M_contig988.20508.1	Ec-07_002130.1
OG0000932	TRUE	prot_D-dichotoma_M_contig989.20511.1	Ec-27_003460.1
OG0000933	TRUE	prot_D-dichotoma_M_contig312.10798.1	Ec-07_000440.1
OG0000934	TRUE	prot_D-dichotoma_M_contig868.19439.1	Ec-05_006110.1
OG0000935	TRUE	prot_D-dichotoma_M_contig562.16370.1	Ec-10_003330.1
OG0000936	TRUE	prot_D-dichotoma_M_contig369.12380.1	Ec-24_003220.1
OG0000937	TRUE	prot_D-dichotoma_M_contig2481.8525.1	Ec-27_006040.1
OG0000938	TRUE	prot_D-dichotoma_M_contig3445.11702.1	Ec-24_000450.1
OG0000939	TRUE	prot_D-dichotoma_M_contig118.1461.1	Ec-13_001620.1
OG0000940	TRUE	prot_D-dichotoma_M_contig330.11353.1	Ec-02_003390.1
OG0000941	TRUE	prot_D-dichotoma_M_contig262.9031.1	Ec-00_000350.1
OG0000942	TRUE	prot_D-dichotoma_M_contig2766.9531.1	Ec-05_005490.1
OG0000943	TRUE	prot_D-dichotoma_M_contig325.11203.1	Ec-11_001120.1
OG0000944	TRUE	prot_D-dichotoma_M_contig191.5827.1	Ec-09_000780.1
OG0000945	TRUE	prot_D-dichotoma_M_contig143.3139.1	Ec-16_000390.1
OG0000946	TRUE	prot_D-dichotoma_M_contig299.10322.1	Ec-02_004990.1
OG0000947	TRUE	prot_D-dichotoma_M_contig1176.1428.1	Ec-13_001200.1
OG0000948	TRUE	prot_D-dichotoma_M_contig38.12623.1	Ec-10_002570.1
OG0000949	TRUE	prot_D-dichotoma_M_contig375.12511.1	Ec-02_003920.1
OG0000950	TRUE	prot_D-dichotoma_M_contig375.12512.1	Ec-02_003910.1
OG0000951	TRUE	prot_D-dichotoma_M_contig375.12513.1	Ec-02_003900.1
OG0000952	TRUE	prot_D-dichotoma_M_contig375.12515.1	Ec-02_003330.1
OG0000953	TRUE	prot_D-dichotoma_M_contig375.12516.1	Ec-02_004400.1
OG0000954	TRUE	prot_D-dichotoma_M_contig375.12521.1	Ec-20_000410.1
OG0000955	TRUE	prot_D-dichotoma_M_contig375.12522.1	Ec-20_000510.1
OG0000956	TRUE	prot_D-dichotoma_M_contig375.12523.1	Ec-20_002540.1
OG0000957	TRUE	prot_D-dichotoma_M_contig375.12524.1	Ec-20_002530.1
OG0000958	TRUE	prot_D-dichotoma_M_contig376.12537.1	Ec-09_001790.1
OG0000959	TRUE	prot_D-dichotoma_M_contig376.12540.1	Ec-09_001800.1
OG0000960	TRUE	prot_D-dichotoma_M_contig376.12542.1	Ec-09_002090.1
OG0000961	TRUE	prot_D-dichotoma_M_contig377.12551.1	Ec-27_003910.1
OG0000962	TRUE	prot_D-dichotoma_M_contig377.12552.1	Ec-27_003920.1
OG0000963	TRUE	prot_D-dichotoma_M_contig377.12554.1	Ec-27_003930.1
OG0000964	TRUE	prot_D-dichotoma_M_contig377.12557.1	Ec-27_005230.1
OG0000965	TRUE	prot_D-dichotoma_M_contig1231.1834.1	Ec-09_004820.1
OG0000966	TRUE	prot_D-dichotoma_M_contig1232.1838.1	Ec-08_003970.1
OG0000967	TRUE	prot_D-dichotoma_M_contig1232.1841.1	Ec-08_003780.1
OG0000968	TRUE	prot_D-dichotoma_M_contig1232.1842.1	Ec-08_003940.1
OG0000969	TRUE	prot_D-dichotoma_M_contig1232.1844.1	Ec-08_003600.1
OG0000970	TRUE	prot_D-dichotoma_M_contig1233.1849.1	Ec-12_002290.1
OG0000971	TRUE	prot_D-dichotoma_M_contig1233.1850.1	Ec-12_002280.1
OG0000972	TRUE	prot_D-dichotoma_M_contig1233.1851.1	Ec-12_002270.1
OG0000973	TRUE	prot_D-dichotoma_M_contig1235.1856.1	Ec-12_006160.1
OG0000974	TRUE	prot_D-dichotoma_M_contig1235.1862.1	Ec-12_006010.1
OG0000975	TRUE	prot_D-dichotoma_M_contig1235.1863.1	Ec-12_007550.1
OG0000976	TRUE	prot_D-dichotoma_M_contig1235.1865.1	Ec-12_008440.1
OG0000977	TRUE	prot_D-dichotoma_M_contig1531.3769.1	Ec-01_003050.1
OG0000978	TRUE	prot_D-dichotoma_M_contig1531.3771.1	Ec-01_003060.1
OG0000979	TRUE	prot_D-dichotoma_M_contig1531.3772.1	Ec-01_003080.1
OG0000980	TRUE	prot_D-dichotoma_M_contig1531.3774.1	Ec-01_003040.1
OG0000981	TRUE	prot_D-dichotoma_M_contig1535.3782.1	Ec-04_004990.1
OG0000982	TRUE	prot_D-dichotoma_M_contig1535.3783.1	Ec-04_005010.1
OG0000983	TRUE	prot_D-dichotoma_M_contig1535.3784.1	Ec-04_004940.1
OG0000984	TRUE	prot_D-dichotoma_M_contig1535.3785.1	Ec-04_004930.1
OG0000985	TRUE	prot_D-dichotoma_M_contig1536.3788.1	Ec-19_005380.1
OG0000986	TRUE	prot_D-dichotoma_M_contig1536.3789.1	Ec-19_005390.1
OG0000987	TRUE	prot_D-dichotoma_M_contig1537.3793.1	Ec-12_007160.1
OG0000988	TRUE	prot_D-dichotoma_M_contig11.852.1	Ec-16_005070.1
OG0000989	TRUE	prot_D-dichotoma_M_contig11.853.1	Ec-16_005080.1
OG0000990	TRUE	prot_D-dichotoma_M_contig11.854.1	Ec-16_005090.1
OG0000991	TRUE	prot_D-dichotoma_M_contig11.855.1	Ec-16_005100.1
OG0000992	TRUE	prot_D-dichotoma_M_contig11.856.1	Ec-16_005110.1
OG0000993	TRUE	prot_D-dichotoma_M_contig11.857.1	Ec-16_005160.1
OG0000994	TRUE	prot_D-dichotoma_M_contig11.860.1	Ec-16_003400.1
OG0000995	TRUE	prot_D-dichotoma_M_contig11.861.1	Ec-16_004420.1
OG0000996	TRUE	prot_D-dichotoma_M_contig11.862.1	Ec-16_003390.1
OG0000997	TRUE	prot_D-dichotoma_M_contig11.863.1	Ec-14_001220.1
OG0000998	TRUE	prot_D-dichotoma_M_contig11.864.1	Ec-16_003370.1
OG0000999	TRUE	prot_D-dichotoma_M_contig11.865.1	Ec-16_004340.1
OG0001000	TRUE	prot_D-dichotoma_M_contig11.866.1	Ec-16_004350.1
OG0001001	TRUE	prot_D-dichotoma_M_contig11.867.1	Ec-21_004700.1
OG0001002	TRUE	prot_D-dichotoma_M_contig11.868.1	Ec-21_006150.1
OG0001003	TRUE	prot_D-dichotoma_M_contig11.870.1	Ec-15_003920.1
OG0001004	TRUE	prot_D-dichotoma_M_contig368.12333.1	Ec-07_006400.1
OG0001005	TRUE	prot_D-dichotoma_M_contig369.12365.1	Ec-24_003440.1
OG0001006	TRUE	prot_D-dichotoma_M_contig369.12367.1	Ec-24_003430.1
OG0001007	TRUE	prot_D-dichotoma_M_contig369.12368.1	Ec-24_003470.1
OG0001008	TRUE	prot_D-dichotoma_M_contig369.12371.1	Ec-24_003200.1
OG0001009	TRUE	prot_D-dichotoma_M_contig369.12372.1	Ec-24_003250.1
OG0001010	TRUE	prot_D-dichotoma_M_contig369.12373.1	Ec-24_002610.1
OG0001011	TRUE	prot_D-dichotoma_M_contig369.12376.1	Ec-24_002990.1
OG0001012	TRUE	prot_D-dichotoma_M_contig369.12378.1	Ec-24_002600.1
OG0001013	TRUE	prot_D-dichotoma_M_contig369.12379.1	Ec-24_003210.1
OG0001014	TRUE	prot_D-dichotoma_M_contig370.12404.1	Ec-12_008890.1
OG0001015	TRUE	prot_D-dichotoma_M_contig370.12405.1	Ec-12_008870.1
OG0001016	TRUE	prot_D-dichotoma_M_contig370.12406.1	Ec-12_008860.1
OG0001017	TRUE	prot_D-dichotoma_M_contig370.12407.1	Ec-12_008850.1
OG0001018	TRUE	prot_D-dichotoma_M_contig370.12409.1	Ec-12_008840.1
OG0001019	TRUE	prot_D-dichotoma_M_contig370.12411.1	Ec-12_008830.1
OG0001020	TRUE	prot_D-dichotoma_M_contig370.12412.1	Ec-12_008810.1
OG0001021	TRUE	prot_D-dichotoma_M_contig370.12415.1	Ec-12_008780.1
OG0001022	TRUE	prot_D-dichotoma_M_contig370.12417.1	Ec-12_008770.1
OG0001023	TRUE	prot_D-dichotoma_M_contig370.12418.1	Ec-12_008760.1
OG0001024	TRUE	prot_D-dichotoma_M_contig370.12419.1	Ec-12_008750.1
OG0001025	TRUE	prot_D-dichotoma_M_contig474.14769.1	Ec-26_004630.1
OG0001026	TRUE	prot_D-dichotoma_M_contig474.14770.1	Ec-26_004670.1
OG0001027	TRUE	prot_D-dichotoma_M_contig474.14772.1	Ec-26_006090.1
OG0001028	TRUE	prot_D-dichotoma_M_contig474.14771.1	Ec-26_006080.1
OG0001029	TRUE	prot_D-dichotoma_M_contig474.14773.1	Ec-26_006070.1
OG0001030	TRUE	prot_D-dichotoma_M_contig474.14774.1	Ec-26_006060.1
OG0001031	TRUE	prot_D-dichotoma_M_contig474.14775.1	Ec-26_006050.1
OG0001032	TRUE	prot_D-dichotoma_M_contig474.14777.1	Ec-26_006040.1
OG0001033	TRUE	prot_D-dichotoma_M_contig475.14782.1	Ec-22_001610.1
OG0001034	TRUE	prot_D-dichotoma_M_contig475.14783.1	Ec-22_001640.1
OG0001035	TRUE	prot_D-dichotoma_M_contig475.14785.1	Ec-22_001630.1
OG0001036	TRUE	prot_D-dichotoma_M_contig475.14786.1	Ec-22_000900.1
OG0001037	TRUE	prot_D-dichotoma_M_contig10.43.1	Ec-08_003470.1
OG0001038	TRUE	prot_D-dichotoma_M_contig10.45.1	Ec-08_003500.1
OG0001039	TRUE	prot_D-dichotoma_M_contig10.46.1	Ec-08_003510.1
OG0001040	TRUE	prot_D-dichotoma_M_contig10.48.1	Ec-08_000260.1
OG0001041	TRUE	prot_D-dichotoma_M_contig10.51.1	Ec-08_000250.1
OG0001042	TRUE	prot_D-dichotoma_M_contig10.52.1	Ec-08_000290.1
OG0001043	TRUE	prot_D-dichotoma_M_contig10.53.1	Ec-08_000300.1
OG0001044	TRUE	prot_D-dichotoma_M_contig10.54.1	Ec-08_000310.1
OG0001045	TRUE	prot_D-dichotoma_M_contig10.57.1	Ec-08_000350.1
OG0001046	TRUE	prot_D-dichotoma_M_contig10.58.1	Ec-08_000360.1
OG0001047	TRUE	prot_D-dichotoma_M_contig10.59.1	Ec-08_000370.1
OG0001048	TRUE	prot_D-dichotoma_M_contig10.61.1	Ec-08_000400.1
OG0001049	TRUE	prot_D-dichotoma_M_contig10.62.1	Ec-08_000410.1
OG0001050	TRUE	prot_D-dichotoma_M_contig10.66.1	Ec-08_000790.1
OG0001051	TRUE	prot_D-dichotoma_M_contig10.67.1	Ec-08_000770.1
OG0001052	TRUE	prot_D-dichotoma_M_contig9.19741.1	Ec-09_000020.1
OG0001053	TRUE	prot_D-dichotoma_M_contig9.19742.1	Ec-09_000410.1
OG0001054	TRUE	prot_D-dichotoma_M_contig9.19743.1	Ec-09_000850.1
OG0001055	TRUE	prot_D-dichotoma_M_contig9.19744.1	Ec-26_005400.1
OG0001056	TRUE	prot_D-dichotoma_M_contig9.19746.1	Ec-09_000950.1
OG0001057	TRUE	prot_D-dichotoma_M_contig9.19747.1	Ec-09_000960.1
OG0001058	TRUE	prot_D-dichotoma_M_contig9.19750.1	Ec-09_000010.1
OG0001059	TRUE	prot_D-dichotoma_M_contig9.19751.1	Ec-09_000370.1
OG0001060	TRUE	prot_D-dichotoma_M_contig9.19752.1	Ec-09_000380.1
OG0001061	TRUE	prot_D-dichotoma_M_contig9.19753.1	Ec-09_000390.1
OG0001062	TRUE	prot_D-dichotoma_M_contig9.19754.1	Ec-09_000870.1
OG0001063	TRUE	prot_D-dichotoma_M_contig9.19755.1	Ec-09_000890.1
OG0001064	TRUE	prot_D-dichotoma_M_contig1436.3193.1	Ec-16_004910.1
OG0001065	TRUE	prot_D-dichotoma_M_contig1436.3194.1	Ec-16_005190.1
OG0001066	TRUE	prot_D-dichotoma_M_contig1436.3195.1	Ec-16_005180.1
OG0001067	TRUE	prot_D-dichotoma_M_contig1437.3197.1	Ec-02_001440.1
OG0001068	TRUE	prot_D-dichotoma_M_contig1437.3200.1	Ec-02_001450.1
OG0001069	TRUE	prot_D-dichotoma_M_contig1438.3202.1	Ec-28_002100.1
OG0001070	TRUE	prot_D-dichotoma_M_contig1439.3204.1	Ec-27_006940.1
OG0001071	TRUE	prot_D-dichotoma_M_contig1439.3205.1	Ec-27_006930.1
OG0001072	TRUE	prot_D-dichotoma_M_contig1439.3206.1	Ec-27_006920.1
OG0001073	TRUE	prot_D-dichotoma_M_contig1441.3228.1	Ec-14_004970.1
OG0001074	TRUE	prot_D-dichotoma_M_contig1441.3232.1	Ec-00_009100.1
OG0001075	TRUE	prot_D-dichotoma_M_contig1441.3233.1	Ec-00_009110.1
OG0001076	TRUE	prot_D-dichotoma_M_contig1441.3234.1	Ec-14_006230.1
OG0001077	TRUE	prot_D-dichotoma_M_contig1441.3235.1	Ec-14_006220.1
OG0001078	TRUE	prot_D-dichotoma_M_contig556.16263.1	Ec-15_002790.1
OG0001079	TRUE	prot_D-dichotoma_M_contig556.16264.1	Ec-15_002810.1
OG0001080	TRUE	prot_D-dichotoma_M_contig556.16266.1	Ec-15_002890.1
OG0001081	TRUE	prot_D-dichotoma_M_contig556.16267.1	Ec-15_002870.1
OG0001082	TRUE	prot_D-dichotoma_M_contig556.16271.1	Ec-15_002960.1
OG0001083	TRUE	prot_D-dichotoma_M_contig556.16274.1	Ec-15_002950.1
OG0001084	TRUE	prot_D-dichotoma_M_contig557.16282.1	Ec-06_008390.1
OG0001085	TRUE	prot_D-dichotoma_M_contig558.16290.1	Ec-17_003630.1
OG0001086	TRUE	prot_D-dichotoma_M_contig558.16291.1	Ec-17_003670.1
OG0001087	TRUE	prot_D-dichotoma_M_contig558.16292.1	Ec-17_003660.1
OG0001088	TRUE	prot_D-dichotoma_M_contig558.16293.1	Ec-17_003680.1
OG0001089	TRUE	prot_D-dichotoma_M_contig558.16294.1	Ec-17_003840.1
OG0001090	TRUE	prot_D-dichotoma_M_contig558.16296.1	Ec-17_003360.1
OG0001091	TRUE	prot_D-dichotoma_M_contig558.16297.1	Ec-17_003380.1
OG0001092	TRUE	prot_D-dichotoma_M_contig559.16305.1	Ec-27_005670.1
OG0001093	TRUE	prot_D-dichotoma_M_contig559.16306.1	Ec-27_005660.1
OG0001094	TRUE	prot_D-dichotoma_M_contig559.16307.1	Ec-27_005280.1
OG0001095	TRUE	prot_D-dichotoma_M_contig559.16309.1	Ec-27_005300.1
OG0001096	TRUE	prot_D-dichotoma_M_contig559.16310.1	Ec-27_005710.1
OG0001097	TRUE	prot_D-dichotoma_M_contig559.16313.1	Ec-27_004440.1
OG0001098	TRUE	prot_D-dichotoma_M_contig559.16315.1	Ec-27_004430.1
OG0001099	TRUE	prot_D-dichotoma_M_contig5382.15970.1	Ec-01_001740.1
OG0001100	TRUE	prot_D-dichotoma_M_contig5416.16041.1	Ec-17_002900.1
OG0001101	TRUE	prot_D-dichotoma_M_contig809.18932.1	Ec-26_004320.1
OG0001102	TRUE	prot_D-dichotoma_M_contig809.18933.1	Ec-26_004330.1
OG0001103	TRUE	prot_D-dichotoma_M_contig809.18935.1	Ec-26_004050.1
OG0001104	TRUE	prot_D-dichotoma_M_contig809.18936.1	Ec-26_005060.1
OG0001105	TRUE	prot_D-dichotoma_M_contig810.18959.1	Ec-07_000710.1
OG0001106	TRUE	prot_D-dichotoma_M_contig810.18960.1	Ec-07_000700.1
OG0001107	TRUE	prot_D-dichotoma_M_contig811.18962.1	Ec-06_002280.1
OG0001108	TRUE	prot_D-dichotoma_M_contig811.18963.1	Ec-06_002270.1
OG0001109	TRUE	prot_D-dichotoma_M_contig811.18966.1	Ec-06_002700.1
OG0001110	TRUE	prot_D-dichotoma_M_contig811.18967.1	Ec-06_002710.1
OG0001111	TRUE	prot_D-dichotoma_M_contig812.18973.1	Ec-10_001330.1
OG0001112	TRUE	prot_D-dichotoma_M_contig1836.5444.1	Ec-19_000390.1
OG0001113	TRUE	prot_D-dichotoma_M_contig1836.5445.1	Ec-19_000760.1
OG0001114	TRUE	prot_D-dichotoma_M_contig1837.5446.1	Ec-01_000960.1
OG0001115	TRUE	prot_D-dichotoma_M_contig1837.5448.1	Ec-01_000620.1
OG0001116	TRUE	prot_D-dichotoma_M_contig1838.5449.1	Ec-19_004650.1
OG0001117	TRUE	prot_D-dichotoma_M_contig1838.5450.1	Ec-03_004560.1
OG0001118	TRUE	prot_D-dichotoma_M_contig1840.5466.1	Ec-21_001650.1
OG0001119	TRUE	prot_D-dichotoma_M_contig1840.5467.1	Ec-21_001640.1
OG0001120	TRUE	prot_D-dichotoma_M_contig2475.8496.1	Ec-22_003810.1
OG0001121	TRUE	prot_D-dichotoma_M_contig2475.8497.1	Ec-22_003820.1
OG0001122	TRUE	prot_D-dichotoma_M_contig2476.8498.1	Ec-02_001470.1
OG0001123	TRUE	prot_D-dichotoma_M_contig2476.8499.1	Ec-02_001480.1
OG0001124	TRUE	prot_D-dichotoma_M_contig2476.8503.1	Ec-02_001490.1
OG0001125	TRUE	prot_D-dichotoma_M_contig2477.8504.1	Ec-12_000290.1
OG0001126	TRUE	prot_D-dichotoma_M_contig2477.8505.1	Ec-12_000300.1
OG0001127	TRUE	prot_D-dichotoma_M_contig2477.8506.1	Ec-12_000230.1
OG0001128	TRUE	prot_D-dichotoma_M_contig2478.8507.1	Ec-02_000540.1
OG0001129	TRUE	prot_D-dichotoma_M_contig2481.8524.1	Ec-27_005980.1
OG0001130	TRUE	prot_D-dichotoma_M_contig2482.8526.1	Ec-07_005960.1
OG0001131	TRUE	prot_D-dichotoma_M_contig2482.8527.1	Ec-07_005970.1
OG0001132	TRUE	prot_D-dichotoma_M_contig70.17889.1	Ec-21_002620.1
OG0001133	TRUE	prot_D-dichotoma_M_contig70.17890.1	Ec-21_002610.1
OG0001134	TRUE	prot_D-dichotoma_M_contig70.17891.1	Ec-21_002560.1
OG0001135	TRUE	prot_D-dichotoma_M_contig70.17893.1	Ec-21_002580.1
OG0001136	TRUE	prot_D-dichotoma_M_contig70.17894.1	Ec-21_002600.1
OG0001137	TRUE	prot_D-dichotoma_M_contig70.17895.1	Ec-21_002530.1
OG0001138	TRUE	prot_D-dichotoma_M_contig70.17897.1	Ec-21_002520.1
OG0001139	TRUE	prot_D-dichotoma_M_contig70.17898.1	Ec-00_006620.1
OG0001140	TRUE	prot_D-dichotoma_M_contig70.17900.1	Ec-21_003590.1
OG0001141	TRUE	prot_D-dichotoma_M_contig70.17901.1	Ec-21_003820.1
OG0001142	TRUE	prot_D-dichotoma_M_contig70.17905.1	Ec-21_003900.1
OG0001143	TRUE	prot_D-dichotoma_M_contig70.17906.1	Ec-21_003440.1
OG0001144	TRUE	prot_D-dichotoma_M_contig70.17907.1	Ec-21_002930.1
OG0001145	TRUE	prot_D-dichotoma_M_contig70.17908.1	Ec-21_003130.1
OG0001146	TRUE	prot_D-dichotoma_M_contig70.17909.1	Ec-21_005390.1
OG0001147	TRUE	prot_D-dichotoma_M_contig70.17910.1	Ec-21_005410.1
OG0001148	TRUE	prot_D-dichotoma_M_contig71.17990.1	Ec-17_000480.1
OG0001149	TRUE	prot_D-dichotoma_M_contig71.17992.1	Ec-17_000610.1
OG0001150	TRUE	prot_D-dichotoma_M_contig71.17996.1	Ec-17_000640.1
OG0001151	TRUE	prot_D-dichotoma_M_contig71.17998.1	Ec-17_000630.1
OG0001152	TRUE	prot_D-dichotoma_M_contig71.18000.1	Ec-17_000660.1
OG0001153	TRUE	prot_D-dichotoma_M_contig71.18001.1	Ec-17_000670.1
OG0001154	TRUE	prot_D-dichotoma_M_contig71.18003.1	Ec-17_000680.1
OG0001155	TRUE	prot_D-dichotoma_M_contig71.18004.1	Ec-17_000690.1
OG0001156	TRUE	prot_D-dichotoma_M_contig71.18005.1	Ec-17_000710.1
OG0001157	TRUE	prot_D-dichotoma_M_contig71.18006.1	Ec-17_000730.1
OG0001158	TRUE	prot_D-dichotoma_M_contig71.18010.1	Ec-17_000350.1
OG0001159	TRUE	prot_D-dichotoma_M_contig71.18011.1	Ec-17_000360.1
OG0001160	TRUE	prot_D-dichotoma_M_contig1140.1174.1	Ec-04_002000.1
OG0001161	TRUE	prot_D-dichotoma_M_contig1140.1177.1	Ec-04_001980.1
OG0001162	TRUE	prot_D-dichotoma_M_contig1141.1183.1	Ec-07_004670.1
OG0001163	TRUE	prot_D-dichotoma_M_contig1142.1188.1	Ec-00_000500.1
OG0001164	TRUE	prot_D-dichotoma_M_contig1142.1189.1	Ec-12_006360.1
OG0001165	TRUE	prot_D-dichotoma_M_contig1142.1190.1	Ec-12_006320.1
OG0001166	TRUE	prot_D-dichotoma_M_contig1142.1191.1	Ec-12_004990.1
OG0001167	TRUE	prot_D-dichotoma_M_contig1142.1192.1	Ec-12_008320.1
OG0001168	TRUE	prot_D-dichotoma_M_contig1142.1193.1	Ec-12_009100.1
OG0001169	TRUE	prot_D-dichotoma_M_contig1142.1194.1	Ec-12_009110.1
OG0001170	TRUE	prot_D-dichotoma_M_contig1143.1197.1	Ec-26_000330.1
OG0001171	TRUE	prot_D-dichotoma_M_contig1143.1198.1	Ec-26_000280.1
OG0001172	TRUE	prot_D-dichotoma_M_contig1143.1199.1	Ec-26_000250.1
OG0001173	TRUE	prot_D-dichotoma_M_contig1143.1200.1	Ec-26_000240.1
OG0001174	TRUE	prot_D-dichotoma_M_contig1143.1201.1	Ec-26_000220.1
OG0001175	TRUE	prot_D-dichotoma_M_contig1143.1202.1	Ec-26_000120.1
OG0001176	TRUE	prot_D-dichotoma_M_contig4526.14352.1	Ec-01_003340.1
OG0001177	TRUE	prot_D-dichotoma_M_contig4534.14369.1	Ec-06_002970.1
OG0001178	TRUE	prot_D-dichotoma_M_contig4540.14393.1	Ec-11_004780.1
OG0001179	TRUE	prot_D-dichotoma_M_contig4550.14403.1	Ec-07_000180.1
OG0001180	TRUE	prot_D-dichotoma_M_contig4554.14407.1	Ec-04_001690.1
OG0001181	TRUE	prot_D-dichotoma_M_contig1200.1636.1	Ec-20_001400.1
OG0001182	TRUE	prot_D-dichotoma_M_contig1201.1641.1	Ec-25_000010.1
OG0001183	TRUE	prot_D-dichotoma_M_contig1202.1642.1	Ec-08_004260.1
OG0001184	TRUE	prot_D-dichotoma_M_contig1202.1643.1	Ec-08_004270.1
OG0001185	TRUE	prot_D-dichotoma_M_contig1202.1644.1	Ec-08_004250.1
OG0001186	TRUE	prot_D-dichotoma_M_contig1202.1646.1	Ec-08_004280.1
OG0001187	TRUE	prot_D-dichotoma_M_contig1203.1650.1	Ec-03_002790.1
OG0001188	TRUE	prot_D-dichotoma_M_contig1204.1653.1	Ec-15_001420.1
OG0001189	TRUE	prot_D-dichotoma_M_contig1204.1657.1	Ec-15_001330.1
OG0001190	TRUE	prot_D-dichotoma_M_contig932.20061.1	Ec-11_004300.1
OG0001191	TRUE	prot_D-dichotoma_M_contig932.20064.1	Ec-11_004280.1
OG0001192	TRUE	prot_D-dichotoma_M_contig932.20065.1	Ec-11_004250.1
OG0001193	TRUE	prot_D-dichotoma_M_contig932.20066.1	Ec-11_005860.1
OG0001194	TRUE	prot_D-dichotoma_M_contig932.20067.1	Ec-11_003570.1
OG0001195	TRUE	prot_D-dichotoma_M_contig933.20070.1	Ec-22_001850.1
OG0001196	TRUE	prot_D-dichotoma_M_contig933.20077.1	Ec-22_003560.1
OG0001197	TRUE	prot_D-dichotoma_M_contig934.20079.1	Ec-24_002640.1
OG0001198	TRUE	prot_D-dichotoma_M_contig934.20080.1	Ec-24_002620.1
OG0001199	TRUE	prot_D-dichotoma_M_contig934.20081.1	Ec-24_003510.1
OG0001200	TRUE	prot_D-dichotoma_M_contig934.20085.1	Ec-24_003410.1
OG0001201	TRUE	prot_D-dichotoma_M_contig935.20090.1	Ec-05_006190.1
OG0001202	TRUE	prot_D-dichotoma_M_contig935.20092.1	Ec-05_006200.1
OG0001203	TRUE	prot_D-dichotoma_M_contig935.20093.1	Ec-05_006210.1
OG0001204	TRUE	prot_D-dichotoma_M_contig936.20095.1	Ec-20_000920.1
OG0001205	TRUE	prot_D-dichotoma_M_contig937.20096.1	Ec-07_003040.1
OG0001206	TRUE	prot_D-dichotoma_M_contig937.20098.1	Ec-07_003030.1
OG0001207	TRUE	prot_D-dichotoma_M_contig937.20099.1	Ec-07_003020.1
OG0001208	TRUE	prot_D-dichotoma_M_contig937.20101.1	Ec-07_003000.1
OG0001209	TRUE	prot_D-dichotoma_M_contig3614.12175.1	Ec-12_004930.1
OG0001210	TRUE	prot_D-dichotoma_M_contig3615.12179.1	Ec-12_004590.1
OG0001211	TRUE	prot_D-dichotoma_M_contig3626.12202.1	Ec-20_001900.1
OG0001212	TRUE	prot_D-dichotoma_M_contig541.16020.1	Ec-05_005700.1
OG0001213	TRUE	prot_D-dichotoma_M_contig541.16022.1	Ec-05_005710.1
OG0001214	TRUE	prot_D-dichotoma_M_contig543.16050.1	Ec-01_008950.1
OG0001215	TRUE	prot_D-dichotoma_M_contig543.16051.1	Ec-01_008640.1
OG0001216	TRUE	prot_D-dichotoma_M_contig543.16053.1	Ec-01_008650.1
OG0001217	TRUE	prot_D-dichotoma_M_contig543.16054.1	Ec-01_008660.1
OG0001218	TRUE	prot_D-dichotoma_M_contig543.16057.1	Ec-01_008670.1
OG0001219	TRUE	prot_D-dichotoma_M_contig543.16058.1	Ec-01_008690.1
OG0001220	TRUE	prot_D-dichotoma_M_contig543.16061.1	Ec-01_008710.1
OG0001221	TRUE	prot_D-dichotoma_M_contig717.18067.1	Ec-03_004210.1
OG0001222	TRUE	prot_D-dichotoma_M_contig718.18070.1	Ec-27_004060.1
OG0001223	TRUE	prot_D-dichotoma_M_contig718.18071.1	Ec-01_001080.1
OG0001224	TRUE	prot_D-dichotoma_M_contig718.18074.1	Ec-27_004070.1
OG0001225	TRUE	prot_D-dichotoma_M_contig718.18076.1	Ec-27_004050.1
OG0001226	TRUE	prot_D-dichotoma_M_contig718.18078.1	Ec-27_004040.1
OG0001227	TRUE	prot_D-dichotoma_M_contig718.18079.1	Ec-27_004030.1
OG0001228	TRUE	prot_D-dichotoma_M_contig719.18081.1	Ec-22_000400.1
OG0001229	TRUE	prot_D-dichotoma_M_contig719.18084.1	Ec-22_000410.1
OG0001230	TRUE	prot_D-dichotoma_M_contig719.18087.1	Ec-22_000160.1
OG0001231	TRUE	prot_D-dichotoma_M_contig2089.6788.1	Ec-19_003140.1
OG0001232	TRUE	prot_D-dichotoma_M_contig2089.6789.1	Ec-19_003130.1
OG0001233	TRUE	prot_D-dichotoma_M_contig2090.6796.1	Ec-10_001230.1
OG0001234	TRUE	prot_D-dichotoma_M_contig2090.6797.1	Ec-10_001240.1
OG0001235	TRUE	prot_D-dichotoma_M_contig2091.6800.1	Ec-15_002770.1
OG0001236	TRUE	prot_D-dichotoma_M_contig2092.6801.1	Ec-12_007440.1
OG0001237	TRUE	prot_D-dichotoma_M_contig2092.6802.1	Ec-12_007450.1
OG0001238	TRUE	prot_D-dichotoma_M_contig2092.6803.1	Ec-12_007460.1
OG0001239	TRUE	prot_D-dichotoma_M_contig2092.6804.1	Ec-12_007470.1
OG0001240	TRUE	prot_D-dichotoma_M_contig2093.6809.1	Ec-07_006520.1
OG0001241	TRUE	prot_D-dichotoma_M_contig2093.6810.1	Ec-07_006530.1
OG0001242	TRUE	prot_D-dichotoma_M_contig2093.6811.1	Ec-07_006540.1
OG0001243	TRUE	prot_D-dichotoma_M_contig2097.6815.1	Ec-02_000650.1
OG0001244	TRUE	prot_D-dichotoma_M_contig2097.6818.1	Ec-02_000590.1
OG0001245	TRUE	prot_D-dichotoma_M_contig1465.3376.1	Ec-13_004700.1
OG0001246	TRUE	prot_D-dichotoma_M_contig1466.3377.1	Ec-19_004980.1
OG0001247	TRUE	prot_D-dichotoma_M_contig1466.3379.1	Ec-19_005000.1
OG0001248	TRUE	prot_D-dichotoma_M_contig1466.3382.1	Ec-19_004820.1
OG0001249	TRUE	prot_D-dichotoma_M_contig1467.3387.1	Ec-18_001590.1
OG0001250	TRUE	prot_D-dichotoma_M_contig1467.3388.1	Ec-18_001660.1
OG0001251	TRUE	prot_D-dichotoma_M_contig1467.3389.1	Ec-18_001630.1
OG0001252	TRUE	prot_D-dichotoma_M_contig1470.3402.1	Ec-26_000890.1
OG0001253	TRUE	prot_D-dichotoma_M_contig1470.3403.1	Ec-26_000960.1
OG0001254	TRUE	prot_D-dichotoma_M_contig1470.3404.1	Ec-26_000950.1
OG0001255	TRUE	prot_D-dichotoma_M_contig518.15622.1	Ec-28_000430.1
OG0001256	TRUE	prot_D-dichotoma_M_contig518.15623.1	Ec-28_000440.1
OG0001257	TRUE	prot_D-dichotoma_M_contig518.15624.1	Ec-28_000400.1
OG0001258	TRUE	prot_D-dichotoma_M_contig518.15626.1	Ec-28_000390.1
OG0001259	TRUE	prot_D-dichotoma_M_contig519.15633.1	Ec-02_005920.1
OG0001260	TRUE	prot_D-dichotoma_M_contig519.15635.1	Ec-02_005910.1
OG0001261	TRUE	prot_D-dichotoma_M_contig519.15636.1	Ec-02_005900.1
OG0001262	TRUE	prot_D-dichotoma_M_contig519.15638.1	Ec-02_005890.1
OG0001263	TRUE	prot_D-dichotoma_M_contig519.15640.1	Ec-02_004730.1
OG0001264	TRUE	prot_D-dichotoma_M_contig519.15641.1	Ec-02_004740.1
OG0001265	TRUE	prot_D-dichotoma_M_contig520.15680.1	Ec-19_001060.1
OG0001266	TRUE	prot_D-dichotoma_M_contig520.15681.1	Ec-19_000990.1
OG0001267	TRUE	prot_D-dichotoma_M_contig520.15682.1	Ec-19_000970.1
OG0001268	TRUE	prot_D-dichotoma_M_contig520.15683.1	Ec-19_000930.1
OG0001269	TRUE	prot_D-dichotoma_M_contig520.15684.1	Ec-19_001020.1
OG0001270	TRUE	prot_D-dichotoma_M_contig521.15695.1	Ec-18_000030.1
OG0001271	TRUE	prot_D-dichotoma_M_contig564.16394.1	Ec-09_004200.1
OG0001272	TRUE	prot_D-dichotoma_M_contig564.16395.1	Ec-24_004310.1
OG0001273	TRUE	prot_D-dichotoma_M_contig566.16408.1	Ec-06_008930.1
OG0001274	TRUE	prot_D-dichotoma_M_contig566.16409.1	Ec-06_007250.1
OG0001275	TRUE	prot_D-dichotoma_M_contig566.16411.1	Ec-06_009150.1
OG0001276	TRUE	prot_D-dichotoma_M_contig566.16412.1	Ec-06_009360.1
OG0001277	TRUE	prot_D-dichotoma_M_contig566.16416.1	Ec-06_009320.1
OG0001278	TRUE	prot_D-dichotoma_M_contig566.16417.1	Ec-06_009300.1
OG0001279	TRUE	prot_D-dichotoma_M_contig566.16418.1	Ec-06_008480.1
OG0001280	TRUE	prot_D-dichotoma_M_contig567.16421.1	Ec-04_003410.1
OG0001281	TRUE	prot_D-dichotoma_M_contig567.16423.1	Ec-04_004215.1
OG0001282	TRUE	prot_D-dichotoma_M_contig567.16424.1	Ec-04_004210.1
OG0001283	TRUE	prot_D-dichotoma_M_contig567.16425.1	Ec-04_004200.1
OG0001284	TRUE	prot_D-dichotoma_M_contig567.16426.1	Ec-04_004190.1
OG0001285	TRUE	prot_D-dichotoma_M_contig567.16434.1	Ec-04_004660.1
OG0001286	TRUE	prot_D-dichotoma_M_contig567.16435.1	Ec-04_004670.1
OG0001287	TRUE	prot_D-dichotoma_M_contig2921.10115.1	Ec-11_000920.1
OG0001288	TRUE	prot_D-dichotoma_M_contig2926.10123.1	Ec-01_007770.1
OG0001289	TRUE	prot_D-dichotoma_M_contig2926.10124.1	Ec-01_007760.1
OG0001290	TRUE	prot_D-dichotoma_M_contig2926.10125.1	Ec-01_007750.1
OG0001291	TRUE	prot_D-dichotoma_M_contig2927.10126.1	Ec-17_000200.1
OG0001292	TRUE	prot_D-dichotoma_M_contig2928.10129.1	Ec-20_002660.1
OG0001293	TRUE	prot_D-dichotoma_M_contig2930.10144.1	Ec-20_003600.1
OG0001294	TRUE	prot_D-dichotoma_M_contig2609.9001.1	Ec-15_002660.1
OG0001295	TRUE	prot_D-dichotoma_M_contig2609.9002.1	Ec-15_002670.1
OG0001296	TRUE	prot_D-dichotoma_M_contig2610.9011.1	Ec-06_007450.1
OG0001297	TRUE	prot_D-dichotoma_M_contig2612.9013.1	Ec-17_004230.1
OG0001298	TRUE	prot_D-dichotoma_M_contig2613.9015.1	Ec-00_000950.1
OG0001299	TRUE	prot_D-dichotoma_M_contig2616.9019.1	Ec-06_004240.1
OG0001300	TRUE	prot_D-dichotoma_M_contig2617.9021.1	Ec-00_005800.1
OG0001301	TRUE	prot_D-dichotoma_M_contig2617.9023.1	Ec-25_003710.1
OG0001302	TRUE	prot_D-dichotoma_M_contig2617.9024.1	Ec-10_000550.1
OG0001303	TRUE	prot_D-dichotoma_M_contig2619.9027.1	Ec-22_000460.1
OG0001304	TRUE	prot_D-dichotoma_M_contig100.75.1	Ec-12_006960.1
OG0001305	TRUE	prot_D-dichotoma_M_contig100.76.1	Ec-12_006970.1
OG0001306	TRUE	prot_D-dichotoma_M_contig100.77.1	Ec-12_006980.1
OG0001307	TRUE	prot_D-dichotoma_M_contig100.78.1	Ec-12_007000.1
OG0001308	TRUE	prot_D-dichotoma_M_contig100.79.1	Ec-12_007090.1
OG0001309	TRUE	prot_D-dichotoma_M_contig100.80.1	Ec-12_007080.1
OG0001310	TRUE	prot_D-dichotoma_M_contig100.81.1	Ec-12_007060.1
OG0001311	TRUE	prot_D-dichotoma_M_contig100.82.1	Ec-12_006950.1
OG0001312	TRUE	prot_D-dichotoma_M_contig100.83.1	Ec-12_006930.1
OG0001313	TRUE	prot_D-dichotoma_M_contig100.84.1	Ec-12_007290.1
OG0001314	TRUE	prot_D-dichotoma_M_contig100.86.1	Ec-12_007300.1
OG0001315	TRUE	prot_D-dichotoma_M_contig100.87.1	Ec-12_007320.1
OG0001316	TRUE	prot_D-dichotoma_M_contig100.88.1	Ec-12_007330.1
OG0001317	TRUE	prot_D-dichotoma_M_contig100.89.1	Ec-12_007350.1
OG0001318	TRUE	prot_D-dichotoma_M_contig100.90.1	Ec-12_007340.1
OG0001319	TRUE	prot_D-dichotoma_M_contig100.93.1	Ec-12_001870.1
OG0001320	TRUE	prot_D-dichotoma_M_contig100.95.1	Ec-12_008040.1
OG0001321	TRUE	prot_D-dichotoma_M_contig100.96.1	Ec-12_008050.1
OG0001322	TRUE	prot_D-dichotoma_M_contig100.97.1	Ec-12_009090.1
OG0001323	TRUE	prot_D-dichotoma_M_contig100.98.1	Ec-12_007560.1
OG0001324	TRUE	prot_D-dichotoma_M_contig100.100.1	Ec-12_008160.1
OG0001325	TRUE	prot_D-dichotoma_M_contig101.160.1	Ec-22_001250.1
OG0001326	TRUE	prot_D-dichotoma_M_contig101.163.1	Ec-22_001260.1
OG0001327	TRUE	prot_D-dichotoma_M_contig101.165.1	Ec-22_001270.1
OG0001328	TRUE	prot_D-dichotoma_M_contig101.166.1	Ec-22_000520.1
OG0001329	TRUE	prot_D-dichotoma_M_contig101.171.1	Ec-22_000530.1
OG0001330	TRUE	prot_D-dichotoma_M_contig695.17821.1	Ec-00_007840.1
OG0001331	TRUE	prot_D-dichotoma_M_contig695.17822.1	Ec-21_001200.1
OG0001332	TRUE	prot_D-dichotoma_M_contig695.17823.1	Ec-21_001560.1
OG0001333	TRUE	prot_D-dichotoma_M_contig695.17824.1	Ec-21_001570.1
OG0001334	TRUE	prot_D-dichotoma_M_contig695.17826.1	Ec-21_001470.1
OG0001335	TRUE	prot_D-dichotoma_M_contig695.17827.1	Ec-21_001680.1
OG0001336	TRUE	prot_D-dichotoma_M_contig695.17829.1	Ec-22_000330.1
OG0001337	TRUE	prot_D-dichotoma_M_contig697.17840.1	Ec-22_002490.1
OG0001338	TRUE	prot_D-dichotoma_M_contig697.17841.1	Ec-22_002990.1
OG0001339	TRUE	prot_D-dichotoma_M_contig698.17843.1	Ec-22_003380.1
OG0001340	TRUE	prot_D-dichotoma_M_contig698.17844.1	Ec-22_003250.1
OG0001341	TRUE	prot_D-dichotoma_M_contig698.17845.1	Ec-22_003270.1
OG0001342	TRUE	prot_D-dichotoma_M_contig698.17846.1	Ec-22_003280.1
OG0001343	TRUE	prot_D-dichotoma_M_contig698.17847.1	Ec-22_003450.1
OG0001344	TRUE	prot_D-dichotoma_M_contig699.17850.1	Ec-10_002380.1
OG0001345	TRUE	prot_D-dichotoma_M_contig699.17852.1	Ec-10_002390.1
OG0001346	TRUE	prot_D-dichotoma_M_contig682.17704.1	Ec-11_000750.1
OG0001347	TRUE	prot_D-dichotoma_M_contig682.17708.1	Ec-11_000780.1
OG0001348	TRUE	prot_D-dichotoma_M_contig683.17710.1	Ec-19_004280.1
OG0001349	TRUE	prot_D-dichotoma_M_contig684.17721.1	Ec-07_002940.1
OG0001350	TRUE	prot_D-dichotoma_M_contig684.17723.1	Ec-20_001010.1
OG0001351	TRUE	prot_D-dichotoma_M_contig684.17724.1	Ec-20_000890.1
OG0001352	TRUE	prot_D-dichotoma_M_contig685.17725.1	Ec-04_003130.1
OG0001353	TRUE	prot_D-dichotoma_M_contig685.17726.1	Ec-04_003150.1
OG0001354	TRUE	prot_D-dichotoma_M_contig685.17729.1	Ec-00_008720.1
OG0001355	TRUE	prot_D-dichotoma_M_contig685.17730.1	Ec-00_008730.1
OG0001356	TRUE	prot_D-dichotoma_M_contig685.17731.1	Ec-00_008700.1
OG0001357	TRUE	prot_D-dichotoma_M_contig685.17733.1	Ec-00_008690.1
OG0001358	TRUE	prot_D-dichotoma_M_contig685.17734.1	Ec-04_003090.1
OG0001359	TRUE	prot_D-dichotoma_M_contig685.17735.1	Ec-04_003200.1
OG0001360	TRUE	prot_D-dichotoma_M_contig686.17739.1	Ec-24_002740.1
OG0001361	TRUE	prot_D-dichotoma_M_contig3173.10954.1	Ec-01_006680.1
OG0001362	TRUE	prot_D-dichotoma_M_contig3174.10957.1	Ec-07_005320.1
OG0001363	TRUE	prot_D-dichotoma_M_contig3059.10584.1	Ec-26_002380.1
OG0001364	TRUE	prot_D-dichotoma_M_contig3059.10585.1	Ec-26_002370.1
OG0001365	TRUE	prot_D-dichotoma_M_contig3061.10602.1	Ec-21_006010.1
OG0001366	TRUE	prot_D-dichotoma_M_contig3061.10603.1	Ec-21_005970.1
OG0001367	TRUE	prot_D-dichotoma_M_contig3062.10605.1	Ec-26_006340.1
OG0001368	TRUE	prot_D-dichotoma_M_contig3070.10623.1	Ec-05_004570.1
OG0001369	TRUE	prot_D-dichotoma_M_contig3070.10624.1	Ec-05_004560.1
OG0001370	TRUE	prot_D-dichotoma_M_contig108.684.1	Ec-20_004000.1
OG0001371	TRUE	prot_D-dichotoma_M_contig108.689.1	Ec-20_003970.1
OG0001372	TRUE	prot_D-dichotoma_M_contig108.690.1	Ec-20_003960.1
OG0001373	TRUE	prot_D-dichotoma_M_contig108.691.1	Ec-20_003980.1
OG0001374	TRUE	prot_D-dichotoma_M_contig108.692.1	Ec-20_003930.1
OG0001375	TRUE	prot_D-dichotoma_M_contig108.696.1	Ec-20_004740.1
OG0001376	TRUE	prot_D-dichotoma_M_contig108.697.1	Ec-20_004750.1
OG0001377	TRUE	prot_D-dichotoma_M_contig109.763.1	Ec-01_000770.1
OG0001378	TRUE	prot_D-dichotoma_M_contig109.765.1	Ec-01_001540.1
OG0001379	TRUE	prot_D-dichotoma_M_contig109.766.1	Ec-09_000190.1
OG0001380	TRUE	prot_D-dichotoma_M_contig109.767.1	Ec-01_001090.1
OG0001381	TRUE	prot_D-dichotoma_M_contig109.768.1	Ec-01_001100.1
OG0001382	TRUE	prot_D-dichotoma_M_contig109.770.1	Ec-01_001150.1
OG0001383	TRUE	prot_D-dichotoma_M_contig109.771.1	Ec-01_001160.1
OG0001384	TRUE	prot_D-dichotoma_M_contig109.774.1	Ec-01_001170.1
OG0001385	TRUE	prot_D-dichotoma_M_contig109.775.1	Ec-01_001180.1
OG0001386	TRUE	prot_D-dichotoma_M_contig109.776.1	Ec-01_001210.1
OG0001387	TRUE	prot_D-dichotoma_M_contig109.777.1	Ec-01_001220.1
OG0001388	TRUE	prot_D-dichotoma_M_contig109.778.1	Ec-01_001230.1
OG0001389	TRUE	prot_D-dichotoma_M_contig109.779.1	Ec-01_001070.1
OG0001390	TRUE	prot_D-dichotoma_M_contig109.780.1	Ec-01_001060.1
OG0001391	TRUE	prot_D-dichotoma_M_contig109.782.1	Ec-01_001040.1
OG0001392	TRUE	prot_D-dichotoma_M_contig109.783.1	Ec-22_000980.1
OG0001393	TRUE	prot_D-dichotoma_M_contig109.784.1	Ec-22_000990.1
OG0001394	TRUE	prot_D-dichotoma_M_contig109.785.1	Ec-05_002260.1
OG0001395	TRUE	prot_D-dichotoma_M_contig109.786.1	Ec-22_001460.1
OG0001396	TRUE	prot_D-dichotoma_M_contig109.787.1	Ec-24_000080.1
OG0001397	TRUE	prot_D-dichotoma_M_contig2871.9912.1	Ec-17_001040.1
OG0001398	TRUE	prot_D-dichotoma_M_contig2876.9924.1	Ec-12_001660.1
OG0001399	TRUE	prot_D-dichotoma_M_contig2877.9926.1	Ec-19_003610.1
OG0001400	TRUE	prot_D-dichotoma_M_contig2877.9927.1	Ec-19_003410.1
OG0001401	TRUE	prot_D-dichotoma_M_contig2878.9928.1	Ec-09_004160.1
OG0001402	TRUE	prot_D-dichotoma_M_contig2881.9949.1	Ec-00_004630.1
OG0001403	TRUE	prot_D-dichotoma_M_contig2884.9955.1	Ec-08_006660.1
OG0001404	TRUE	prot_D-dichotoma_M_contig4389.14048.1	Ec-06_007490.1
OG0001405	TRUE	prot_D-dichotoma_M_contig4397.14055.1	Ec-12_003200.1
OG0001406	TRUE	prot_D-dichotoma_M_contig4398.14058.1	Ec-12_005360.1
OG0001407	TRUE	prot_D-dichotoma_M_contig4398.14059.1	Ec-12_005290.1
OG0001408	TRUE	prot_D-dichotoma_M_contig4401.14091.1	Ec-07_004610.1
OG0001409	TRUE	prot_D-dichotoma_M_contig4404.14095.1	Ec-26_001220.1
OG0001410	TRUE	prot_D-dichotoma_M_contig599.16843.1	Ec-09_004370.1
OG0001411	TRUE	prot_D-dichotoma_M_contig600.16879.1	Ec-17_001980.1
OG0001412	TRUE	prot_D-dichotoma_M_contig600.16880.1	Ec-17_001990.1
OG0001413	TRUE	prot_D-dichotoma_M_contig600.16883.1	Ec-17_001950.1
OG0001414	TRUE	prot_D-dichotoma_M_contig601.16890.1	Ec-01_008760.1
OG0001415	TRUE	prot_D-dichotoma_M_contig601.16891.1	Ec-06_002060.1
OG0001416	TRUE	prot_D-dichotoma_M_contig601.16896.1	Ec-06_002260.1
OG0001417	TRUE	prot_D-dichotoma_M_contig601.16897.1	Ec-01_008750.1
OG0001418	TRUE	prot_D-dichotoma_M_contig601.16898.1	Ec-06_002340.1
OG0001419	TRUE	prot_D-dichotoma_M_contig601.16899.1	Ec-06_002390.1
OG0001420	TRUE	prot_D-dichotoma_M_contig602.16905.1	Ec-22_002910.1
OG0001421	TRUE	prot_D-dichotoma_M_contig848.19275.1	Ec-07_000690.1
OG0001422	TRUE	prot_D-dichotoma_M_contig849.19276.1	Ec-27_006960.1
OG0001423	TRUE	prot_D-dichotoma_M_contig849.19278.1	Ec-27_006970.1
OG0001424	TRUE	prot_D-dichotoma_M_contig849.19279.1	Ec-27_006870.1
OG0001425	TRUE	prot_D-dichotoma_M_contig849.19280.1	Ec-27_006880.1
OG0001426	TRUE	prot_D-dichotoma_M_contig851.19305.1	Ec-22_001920.1
OG0001427	TRUE	prot_D-dichotoma_M_contig317.10937.1	Ec-24_001970.1
OG0001428	TRUE	prot_D-dichotoma_M_contig317.10939.1	Ec-24_001950.1
OG0001429	TRUE	prot_D-dichotoma_M_contig317.10940.1	Ec-24_001800.1
OG0001430	TRUE	prot_D-dichotoma_M_contig317.10941.1	Ec-24_001910.1
OG0001431	TRUE	prot_D-dichotoma_M_contig317.10942.1	Ec-24_001920.1
OG0001432	TRUE	prot_D-dichotoma_M_contig317.10944.1	Ec-24_002300.1
OG0001433	TRUE	prot_D-dichotoma_M_contig318.10965.1	Ec-07_002290.1
OG0001434	TRUE	prot_D-dichotoma_M_contig318.10966.1	Ec-07_002230.1
OG0001435	TRUE	prot_D-dichotoma_M_contig318.10967.1	Ec-07_002280.1
OG0001436	TRUE	prot_D-dichotoma_M_contig318.10968.1	Ec-07_002270.1
OG0001437	TRUE	prot_D-dichotoma_M_contig318.10969.1	Ec-07_002070.1
OG0001438	TRUE	prot_D-dichotoma_M_contig319.10993.1	Ec-10_001660.1
OG0001439	TRUE	prot_D-dichotoma_M_contig319.10994.1	Ec-10_001670.1
OG0001440	TRUE	prot_D-dichotoma_M_contig319.10995.1	Ec-10_001840.1
OG0001441	TRUE	prot_D-dichotoma_M_contig319.10999.1	Ec-24_003900.1
OG0001442	TRUE	prot_D-dichotoma_M_contig319.11000.1	Ec-14_000430.1
OG0001443	TRUE	prot_D-dichotoma_M_contig320.11055.1	Ec-26_000340.1
OG0001444	TRUE	prot_D-dichotoma_M_contig320.11057.1	Ec-26_000350.1
OG0001445	TRUE	prot_D-dichotoma_M_contig320.11058.1	Ec-26_000390.1
OG0001446	TRUE	prot_D-dichotoma_M_contig320.11062.1	Ec-26_000370.1
OG0001447	TRUE	prot_D-dichotoma_M_contig320.11063.1	Ec-26_003780.1
OG0001448	TRUE	prot_D-dichotoma_M_contig320.11064.1	Ec-26_003770.1
OG0001449	TRUE	prot_D-dichotoma_M_contig320.11066.1	Ec-26_003750.1
OG0001450	TRUE	prot_D-dichotoma_M_contig320.11067.1	Ec-26_003710.1
OG0001451	TRUE	prot_D-dichotoma_M_contig81.18942.1	Ec-24_000310.1
OG0001452	TRUE	prot_D-dichotoma_M_contig81.18944.1	Ec-24_000510.1
OG0001453	TRUE	prot_D-dichotoma_M_contig81.18945.1	Ec-24_000500.1
OG0001454	TRUE	prot_D-dichotoma_M_contig81.18947.1	Ec-24_000620.1
OG0001455	TRUE	prot_D-dichotoma_M_contig81.18951.1	Ec-24_000520.1
OG0001456	TRUE	prot_D-dichotoma_M_contig81.18953.1	Ec-24_000470.1
OG0001457	TRUE	prot_D-dichotoma_M_contig81.18955.1	Ec-24_000460.1
OG0001458	TRUE	prot_D-dichotoma_M_contig82.19017.1	Ec-27_006290.1
OG0001459	TRUE	prot_D-dichotoma_M_contig82.19018.1	Ec-27_006300.1
OG0001460	TRUE	prot_D-dichotoma_M_contig82.19020.1	Ec-27_006360.1
OG0001461	TRUE	prot_D-dichotoma_M_contig82.19022.1	Ec-27_006350.1
OG0001462	TRUE	prot_D-dichotoma_M_contig82.19023.1	Ec-27_006340.1
OG0001463	TRUE	prot_D-dichotoma_M_contig82.19025.1	Ec-27_006370.1
OG0001464	TRUE	prot_D-dichotoma_M_contig82.19026.1	Ec-27_006310.1
OG0001465	TRUE	prot_D-dichotoma_M_contig82.19027.1	Ec-27_006320.1
OG0001466	TRUE	prot_D-dichotoma_M_contig82.19028.1	Ec-27_006330.1
OG0001467	TRUE	prot_D-dichotoma_M_contig2223.7425.1	Ec-10_005950.1
OG0001468	TRUE	prot_D-dichotoma_M_contig2223.7426.1	Ec-10_005960.1
OG0001469	TRUE	prot_D-dichotoma_M_contig2223.7427.1	Ec-10_005970.1
OG0001470	TRUE	prot_D-dichotoma_M_contig2223.7428.1	Ec-10_005980.1
OG0001471	TRUE	prot_D-dichotoma_M_contig2223.7429.1	Ec-10_005990.1
OG0001472	TRUE	prot_D-dichotoma_M_contig2226.7435.1	Ec-12_007660.1
OG0001473	TRUE	prot_D-dichotoma_M_contig2226.7436.1	Ec-12_008330.1
OG0001474	TRUE	prot_D-dichotoma_M_contig2227.7440.1	Ec-05_001880.1
OG0001475	TRUE	prot_D-dichotoma_M_contig2228.7442.1	Ec-21_005110.1
OG0001476	TRUE	prot_D-dichotoma_M_contig2228.7443.1	Ec-21_005120.1
OG0001477	TRUE	prot_D-dichotoma_M_contig2228.7444.1	Ec-21_005160.1
OG0001478	TRUE	prot_D-dichotoma_M_contig2229.7445.1	Ec-08_004390.1
OG0001479	TRUE	prot_D-dichotoma_M_contig2229.7446.1	Ec-08_004400.1
OG0001480	TRUE	prot_D-dichotoma_M_contig2230.7458.1	Ec-08_004790.1
OG0001481	TRUE	prot_D-dichotoma_M_contig2230.7459.1	Ec-08_005000.1
OG0001482	TRUE	prot_D-dichotoma_M_contig2232.7463.1	Ec-23_001250.1
OG0001483	TRUE	prot_D-dichotoma_M_contig252.8680.1	Ec-24_000130.1
OG0001484	TRUE	prot_D-dichotoma_M_contig252.8681.1	Ec-24_000110.1
OG0001485	TRUE	prot_D-dichotoma_M_contig252.8682.1	Ec-24_000090.1
OG0001486	TRUE	prot_D-dichotoma_M_contig253.8705.1	Ec-18_000860.1
OG0001487	TRUE	prot_D-dichotoma_M_contig253.8706.1	Ec-18_000850.1
OG0001488	TRUE	prot_D-dichotoma_M_contig253.8707.1	Ec-18_000740.1
OG0001489	TRUE	prot_D-dichotoma_M_contig254.8733.1	Ec-13_000840.1
OG0001490	TRUE	prot_D-dichotoma_M_contig254.8734.1	Ec-13_000850.1
OG0001491	TRUE	prot_D-dichotoma_M_contig254.8735.1	Ec-13_000660.1
OG0001492	TRUE	prot_D-dichotoma_M_contig254.8736.1	Ec-15_000350.1
OG0001493	TRUE	prot_D-dichotoma_M_contig1116.989.1	Ec-15_003020.1
OG0001494	TRUE	prot_D-dichotoma_M_contig1118.993.1	Ec-15_001770.1
OG0001495	TRUE	prot_D-dichotoma_M_contig1118.997.1	Ec-15_001680.1
OG0001496	TRUE	prot_D-dichotoma_M_contig1118.1001.1	Ec-15_001790.1
OG0001497	TRUE	prot_D-dichotoma_M_contig1118.1002.1	Ec-15_001780.1
OG0001498	TRUE	prot_D-dichotoma_M_contig1119.1006.1	Ec-11_003170.1
OG0001499	TRUE	prot_D-dichotoma_M_contig1119.1007.1	Ec-04_000650.1
OG0001500	TRUE	prot_D-dichotoma_M_contig1119.1011.1	Ec-04_000680.1
OG0001501	TRUE	prot_D-dichotoma_M_contig1119.1014.1	Ec-04_000720.1
OG0001502	TRUE	prot_D-dichotoma_M_contig1119.1017.1	Ec-04_000610.1
OG0001503	TRUE	prot_D-dichotoma_M_contig1119.1019.1	Ec-04_000620.1
OG0001504	TRUE	prot_D-dichotoma_M_contig1120.1032.1	Ec-01_005900.1
OG0001505	TRUE	prot_D-dichotoma_M_contig1120.1033.1	Ec-01_005920.1
OG0001506	TRUE	prot_D-dichotoma_M_contig1120.1035.1	Ec-01_005930.1
OG0001507	TRUE	prot_D-dichotoma_M_contig1120.1039.1	Ec-01_005970.1
OG0001508	TRUE	prot_D-dichotoma_M_contig3445.11703.1	Ec-24_000420.1
OG0001509	TRUE	prot_D-dichotoma_M_contig3447.11710.1	Ec-18_001330.1
OG0001510	TRUE	prot_D-dichotoma_M_contig3449.11713.1	Ec-07_006840.1
OG0001511	TRUE	prot_D-dichotoma_M_contig3450.11735.1	Ec-12_000030.1
OG0001512	TRUE	prot_D-dichotoma_M_contig3450.11736.1	Ec-12_005180.1
OG0001513	TRUE	prot_D-dichotoma_M_contig3450.11737.1	Ec-12_000350.1
OG0001514	TRUE	prot_D-dichotoma_M_contig3454.11741.1	Ec-07_002930.1
OG0001515	TRUE	prot_D-dichotoma_M_contig3456.11750.1	Ec-10_000260.1
OG0001516	TRUE	prot_D-dichotoma_M_contig3457.11752.1	Ec-06_004230.1
OG0001517	TRUE	prot_D-dichotoma_M_contig1322.2489.1	Ec-04_002035.1
OG0001518	TRUE	prot_D-dichotoma_M_contig1322.2490.1	Ec-04_002050.1
OG0001519	TRUE	prot_D-dichotoma_M_contig1323.2494.1	Ec-03_003060.1
OG0001520	TRUE	prot_D-dichotoma_M_contig1325.2501.1	Ec-15_000250.1
OG0001521	TRUE	prot_D-dichotoma_M_contig1.5.1	Ec-05_001810.1
OG0001522	TRUE	prot_D-dichotoma_M_contig1.6.1	Ec-14_006330.1
OG0001523	TRUE	prot_D-dichotoma_M_contig1.7.1	Ec-05_001450.1
OG0001524	TRUE	prot_D-dichotoma_M_contig1.11.1	Ec-05_000820.1
OG0001525	TRUE	prot_D-dichotoma_M_contig1.12.1	Ec-05_000260.1
OG0001526	TRUE	prot_D-dichotoma_M_contig1.13.1	Ec-05_000240.1
OG0001527	TRUE	prot_D-dichotoma_M_contig1.14.1	Ec-05_000250.1
OG0001528	TRUE	prot_D-dichotoma_M_contig1.15.1	Ec-05_001790.1
OG0001529	TRUE	prot_D-dichotoma_M_contig1.16.1	Ec-05_001780.1
OG0001530	TRUE	prot_D-dichotoma_M_contig1.17.1	Ec-05_001770.1
OG0001531	TRUE	prot_D-dichotoma_M_contig1.22.1	Ec-05_001820.1
OG0001532	TRUE	prot_D-dichotoma_M_contig1.23.1	Ec-05_001710.1
OG0001533	TRUE	prot_D-dichotoma_M_contig1.25.1	Ec-05_001730.1
OG0001534	TRUE	prot_D-dichotoma_M_contig1.26.1	Ec-05_001720.1
OG0001535	TRUE	prot_D-dichotoma_M_contig1.29.1	Ec-05_001430.1
OG0001536	TRUE	prot_D-dichotoma_M_contig1.30.1	Ec-05_000850.1
OG0001537	TRUE	prot_D-dichotoma_M_contig1.31.1	Ec-05_000930.1
OG0001538	TRUE	prot_D-dichotoma_M_contig1.32.1	Ec-05_000840.1
OG0001539	TRUE	prot_D-dichotoma_M_contig1.34.1	Ec-05_000950.1
OG0001540	TRUE	prot_D-dichotoma_M_contig1.36.1	Ec-05_000270.1
OG0001541	TRUE	prot_D-dichotoma_M_contig1.37.1	Ec-05_001760.1
OG0001542	TRUE	prot_D-dichotoma_M_contig887.19635.1	Ec-04_004110.1
OG0001543	TRUE	prot_D-dichotoma_M_contig887.19636.1	Ec-08_004330.1
OG0001544	TRUE	prot_D-dichotoma_M_contig887.19637.1	Ec-08_004340.1
OG0001545	TRUE	prot_D-dichotoma_M_contig888.19638.1	Ec-12_001920.1
OG0001546	TRUE	prot_D-dichotoma_M_contig888.19639.1	Ec-12_008360.1
OG0001547	TRUE	prot_D-dichotoma_M_contig888.19640.1	Ec-12_004840.1
OG0001548	TRUE	prot_D-dichotoma_M_contig888.19641.1	Ec-12_004850.1
OG0001549	TRUE	prot_D-dichotoma_M_contig888.19642.1	Ec-12_004870.1
OG0001550	TRUE	prot_D-dichotoma_M_contig888.19643.1	Ec-12_004880.1
OG0001551	TRUE	prot_D-dichotoma_M_contig888.19644.1	Ec-12_004890.1
OG0001552	TRUE	prot_D-dichotoma_M_contig888.19645.1	Ec-12_004900.1
OG0001553	TRUE	prot_D-dichotoma_M_contig888.19646.1	Ec-12_004910.1
OG0001554	TRUE	prot_D-dichotoma_M_contig888.19647.1	Ec-12_007360.1
OG0001555	TRUE	prot_D-dichotoma_M_contig888.19648.1	Ec-12_007270.1
OG0001556	TRUE	prot_D-dichotoma_M_contig889.19652.1	Ec-13_000360.1
OG0001557	TRUE	prot_D-dichotoma_M_contig890.19667.1	Ec-12_006480.1
OG0001558	TRUE	prot_D-dichotoma_M_contig890.19668.1	Ec-12_006540.1
OG0001559	TRUE	prot_D-dichotoma_M_contig890.19669.1	Ec-12_006560.1
OG0001560	TRUE	prot_D-dichotoma_M_contig890.19673.1	Ec-12_006580.1
OG0001561	TRUE	prot_D-dichotoma_M_contig891.19678.1	Ec-01_007340.1
OG0001562	TRUE	prot_D-dichotoma_M_contig891.19679.1	Ec-01_007350.1
OG0001563	TRUE	prot_D-dichotoma_M_contig891.19680.1	Ec-01_007370.1
OG0001564	TRUE	prot_D-dichotoma_M_contig891.19681.1	Ec-01_007380.1
OG0001565	TRUE	prot_D-dichotoma_M_contig891.19682.1	Ec-01_008860.1
OG0001566	TRUE	prot_D-dichotoma_M_contig1333.2552.1	Ec-06_007870.1
OG0001567	TRUE	prot_D-dichotoma_M_contig1335.2561.1	Ec-22_002960.1
OG0001568	TRUE	prot_D-dichotoma_M_contig1336.2563.1	Ec-19_005140.1
OG0001569	TRUE	prot_D-dichotoma_M_contig1336.2564.1	Ec-08_006640.1
OG0001570	TRUE	prot_D-dichotoma_M_contig1337.2567.1	Ec-07_004090.1
OG0001571	TRUE	prot_D-dichotoma_M_contig1337.2569.1	Ec-07_004060.1
OG0001572	TRUE	prot_D-dichotoma_M_contig1337.2570.1	Ec-07_004070.1
OG0001573	TRUE	prot_D-dichotoma_M_contig1337.2571.1	Ec-07_003910.1
OG0001574	TRUE	prot_D-dichotoma_M_contig1339.2573.1	Ec-20_004640.1
OG0001575	TRUE	prot_D-dichotoma_M_contig1339.2575.1	Ec-20_004630.1
OG0001576	TRUE	prot_D-dichotoma_M_contig1339.2576.1	Ec-20_002560.1
OG0001577	TRUE	prot_D-dichotoma_M_contig1339.2577.1	Ec-20_004810.1
OG0001578	TRUE	prot_D-dichotoma_M_contig544.16071.1	Ec-14_000740.1
OG0001579	TRUE	prot_D-dichotoma_M_contig544.16072.1	Ec-14_000750.1
OG0001580	TRUE	prot_D-dichotoma_M_contig544.16073.1	Ec-14_000760.1
OG0001581	TRUE	prot_D-dichotoma_M_contig544.16074.1	Ec-14_000770.1
OG0001582	TRUE	prot_D-dichotoma_M_contig546.16087.1	Ec-18_001080.1
OG0001583	TRUE	prot_D-dichotoma_M_contig546.16092.1	Ec-18_001060.1
OG0001584	TRUE	prot_D-dichotoma_M_contig546.16093.1	Ec-08_005530.1
OG0001585	TRUE	prot_D-dichotoma_M_contig546.16094.1	Ec-18_000910.1
OG0001586	TRUE	prot_D-dichotoma_M_contig547.16103.1	Ec-09_002900.1
OG0001587	TRUE	prot_D-dichotoma_M_contig547.16104.1	Ec-09_003650.1
OG0001588	TRUE	prot_D-dichotoma_M_contig547.16108.1	Ec-09_003680.1
OG0001589	TRUE	prot_D-dichotoma_M_contig2312.7833.1	Ec-19_003840.1
OG0001590	TRUE	prot_D-dichotoma_M_contig2312.7834.1	Ec-19_003850.1
OG0001591	TRUE	prot_D-dichotoma_M_contig2318.7853.1	Ec-00_008830.1
OG0001592	TRUE	prot_D-dichotoma_M_contig2319.7856.1	Ec-02_004370.1
OG0001593	TRUE	prot_D-dichotoma_M_contig2319.7857.1	Ec-02_004200.1
OG0001594	TRUE	prot_D-dichotoma_M_contig2320.7867.1	Ec-14_006280.1
OG0001595	TRUE	prot_D-dichotoma_M_contig4005.13181.1	Ec-04_004820.1
OG0001596	TRUE	prot_D-dichotoma_M_contig4006.13184.1	Ec-17_002060.1
OG0001597	TRUE	prot_D-dichotoma_M_contig4009.13187.1	Ec-19_004670.1
OG0001598	TRUE	prot_D-dichotoma_M_contig4013.13199.1	Ec-17_003420.1
OG0001599	TRUE	prot_D-dichotoma_M_contig4018.13206.1	Ec-16_000630.1
OG0001600	TRUE	prot_D-dichotoma_M_contig4021.13225.1	Ec-04_001620.1
OG0001601	TRUE	prot_D-dichotoma_M_contig1688.4695.1	Ec-04_006530.1
OG0001602	TRUE	prot_D-dichotoma_M_contig1688.4696.1	Ec-28_000530.1
OG0001603	TRUE	prot_D-dichotoma_M_contig1692.4720.1	Ec-14_006340.1
OG0001604	TRUE	prot_D-dichotoma_M_contig1693.4723.1	Ec-04_001120.1
OG0001605	TRUE	prot_D-dichotoma_M_contig1694.4727.1	Ec-00_001310.1
OG0001606	TRUE	prot_D-dichotoma_M_contig1694.4730.1	Ec-27_002540.1
OG0001607	TRUE	prot_D-dichotoma_M_contig1694.4731.1	Ec-00_001090.1
OG0001608	TRUE	prot_D-dichotoma_M_contig1695.4733.1	Ec-01_002900.1
OG0001609	TRUE	prot_D-dichotoma_M_contig1695.4734.1	Ec-01_002890.1
OG0001610	TRUE	prot_D-dichotoma_M_contig1695.4735.1	Ec-01_002880.1
OG0001611	TRUE	prot_D-dichotoma_M_contig897.19722.1	Ec-23_000740.1
OG0001612	TRUE	prot_D-dichotoma_M_contig897.19723.1	Ec-23_000750.1
OG0001613	TRUE	prot_D-dichotoma_M_contig898.19724.1	Ec-10_000040.1
OG0001614	TRUE	prot_D-dichotoma_M_contig898.19727.1	Ec-10_003290.1
OG0001615	TRUE	prot_D-dichotoma_M_contig898.19728.1	Ec-10_002900.1
OG0001616	TRUE	prot_D-dichotoma_M_contig898.19729.1	Ec-10_002890.1
OG0001617	TRUE	prot_D-dichotoma_M_contig898.19730.1	Ec-10_000870.1
OG0001618	TRUE	prot_D-dichotoma_M_contig898.19731.1	Ec-10_000880.1
OG0001619	TRUE	prot_D-dichotoma_M_contig900.19772.1	Ec-09_002880.1
OG0001620	TRUE	prot_D-dichotoma_M_contig900.19774.1	Ec-09_003790.1
OG0001621	TRUE	prot_D-dichotoma_M_contig901.19778.1	Ec-16_004590.1
OG0001622	TRUE	prot_D-dichotoma_M_contig901.19780.1	Ec-16_004400.1
OG0001623	TRUE	prot_D-dichotoma_M_contig901.19781.1	Ec-16_004390.1
OG0001624	TRUE	prot_D-dichotoma_M_contig2596.8937.1	Ec-11_001630.1
OG0001625	TRUE	prot_D-dichotoma_M_contig2597.8939.1	Ec-22_002600.1
OG0001626	TRUE	prot_D-dichotoma_M_contig2598.8942.1	Ec-06_002740.1
OG0001627	TRUE	prot_D-dichotoma_M_contig2598.8943.1	Ec-06_002230.1
OG0001628	TRUE	prot_D-dichotoma_M_contig2598.8944.1	Ec-06_002220.1
OG0001629	TRUE	prot_D-dichotoma_M_contig2598.8945.1	Ec-06_002720.1
OG0001630	TRUE	prot_D-dichotoma_M_contig2599.8946.1	Ec-01_003890.1
OG0001631	TRUE	prot_D-dichotoma_M_contig2603.8992.1	Ec-19_004740.1
OG0001632	TRUE	prot_D-dichotoma_M_contig2604.8993.1	Ec-14_003310.1
OG0001633	TRUE	prot_D-dichotoma_M_contig2604.8994.1	Ec-14_002410.1
OG0001634	TRUE	prot_D-dichotoma_M_contig30.10398.1	Ec-20_005030.1
OG0001635	TRUE	prot_D-dichotoma_M_contig30.10401.1	Ec-20_005070.1
OG0001636	TRUE	prot_D-dichotoma_M_contig30.10402.1	Ec-20_005080.1
OG0001637	TRUE	prot_D-dichotoma_M_contig30.10403.1	Ec-20_005040.1
OG0001638	TRUE	prot_D-dichotoma_M_contig30.10405.1	Ec-20_005050.1
OG0001639	TRUE	prot_D-dichotoma_M_contig30.10406.1	Ec-20_005060.1
OG0001640	TRUE	prot_D-dichotoma_M_contig30.10407.1	Ec-20_005020.1
OG0001641	TRUE	prot_D-dichotoma_M_contig30.10408.1	Ec-18_000450.1
OG0001642	TRUE	prot_D-dichotoma_M_contig30.10409.1	Ec-20_004980.1
OG0001643	TRUE	prot_D-dichotoma_M_contig30.10410.1	Ec-20_004990.1
OG0001644	TRUE	prot_D-dichotoma_M_contig30.10412.1	Ec-20_004970.1
OG0001645	TRUE	prot_D-dichotoma_M_contig30.10415.1	Ec-20_004950.1
OG0001646	TRUE	prot_D-dichotoma_M_contig30.10416.1	Ec-20_003500.1
OG0001647	TRUE	prot_D-dichotoma_M_contig30.10417.1	Ec-20_003510.1
OG0001648	TRUE	prot_D-dichotoma_M_contig31.10712.1	Ec-15_001850.1
OG0001649	TRUE	prot_D-dichotoma_M_contig31.10714.1	Ec-15_001830.1
OG0001650	TRUE	prot_D-dichotoma_M_contig31.10715.1	Ec-15_000530.1
OG0001651	TRUE	prot_D-dichotoma_M_contig31.10716.1	Ec-15_000520.1
OG0001652	TRUE	prot_D-dichotoma_M_contig31.10717.1	Ec-15_000600.1
OG0001653	TRUE	prot_D-dichotoma_M_contig31.10720.1	Ec-15_001550.1
OG0001654	TRUE	prot_D-dichotoma_M_contig31.10723.1	Ec-15_001290.1
OG0001655	TRUE	prot_D-dichotoma_M_contig31.10725.1	Ec-15_001360.1
OG0001656	TRUE	prot_D-dichotoma_M_contig31.10726.1	Ec-15_001350.1
OG0001657	TRUE	prot_D-dichotoma_M_contig735.18203.1	Ec-06_010050.1
OG0001658	TRUE	prot_D-dichotoma_M_contig735.18204.1	Ec-06_010040.1
OG0001659	TRUE	prot_D-dichotoma_M_contig735.18206.1	Ec-06_010020.1
OG0001660	TRUE	prot_D-dichotoma_M_contig735.18207.1	Ec-06_010010.1
OG0001661	TRUE	prot_D-dichotoma_M_contig735.18208.1	Ec-06_010000.1
OG0001662	TRUE	prot_D-dichotoma_M_contig736.18214.1	Ec-03_001310.1
OG0001663	TRUE	prot_D-dichotoma_M_contig736.18215.1	Ec-03_001280.1
OG0001664	TRUE	prot_D-dichotoma_M_contig736.18216.1	Ec-03_001250.1
OG0001665	TRUE	prot_D-dichotoma_M_contig737.18217.1	Ec-27_002800.1
OG0001666	TRUE	prot_D-dichotoma_M_contig737.18218.1	Ec-27_003400.1
OG0001667	TRUE	prot_D-dichotoma_M_contig737.18222.1	Ec-27_001130.1
OG0001668	TRUE	prot_D-dichotoma_M_contig737.18223.1	Ec-02_005630.1
OG0001669	TRUE	prot_D-dichotoma_M_contig738.18225.1	Ec-20_004560.1
OG0001670	TRUE	prot_D-dichotoma_M_contig738.18226.1	Ec-20_004550.1
OG0001671	TRUE	prot_D-dichotoma_M_contig738.18229.1	Ec-20_004040.1
OG0001672	TRUE	prot_D-dichotoma_M_contig1615.4298.1	Ec-20_001810.1
OG0001673	TRUE	prot_D-dichotoma_M_contig1615.4300.1	Ec-20_001800.1
OG0001674	TRUE	prot_D-dichotoma_M_contig1617.4309.1	Ec-18_002550.1
OG0001675	TRUE	prot_D-dichotoma_M_contig1617.4311.1	Ec-18_002540.1
OG0001676	TRUE	prot_D-dichotoma_M_contig1618.4312.1	Ec-25_000070.1
OG0001677	TRUE	prot_D-dichotoma_M_contig1618.4318.1	Ec-25_000060.1
OG0001678	TRUE	prot_D-dichotoma_M_contig1618.4319.1	Ec-25_000390.1
OG0001679	TRUE	prot_D-dichotoma_M_contig1618.4321.1	Ec-25_000400.1
OG0001680	TRUE	prot_D-dichotoma_M_contig1619.4323.1	Ec-04_003810.1
OG0001681	TRUE	prot_D-dichotoma_M_contig1619.4324.1	Ec-04_003970.1
OG0001682	TRUE	prot_D-dichotoma_M_contig1619.4325.1	Ec-04_004080.1
OG0001683	TRUE	prot_D-dichotoma_M_contig1619.4326.1	Ec-04_004070.1
OG0001684	TRUE	prot_D-dichotoma_M_contig1619.4327.1	Ec-04_004050.1
OG0001685	TRUE	prot_D-dichotoma_M_contig1619.4329.1	Ec-04_004010.1
OG0001686	TRUE	prot_D-dichotoma_M_contig1620.4345.1	Ec-23_002860.1
OG0001687	TRUE	prot_D-dichotoma_M_contig1620.4346.1	Ec-23_002870.1
OG0001688	TRUE	prot_D-dichotoma_M_contig1620.4347.1	Ec-23_002410.1
OG0001689	TRUE	prot_D-dichotoma_M_contig1621.4348.1	Ec-27_004200.1
OG0001690	TRUE	prot_D-dichotoma_M_contig1621.4349.1	Ec-27_004160.1
OG0001691	TRUE	prot_D-dichotoma_M_contig1621.4351.1	Ec-27_004170.1
OG0001692	TRUE	prot_D-dichotoma_M_contig1622.4359.1	Ec-16_004000.1
OG0001693	TRUE	prot_D-dichotoma_M_contig1980.6157.1	Ec-27_005260.1
OG0001694	TRUE	prot_D-dichotoma_M_contig1980.6158.1	Ec-27_005560.1
OG0001695	TRUE	prot_D-dichotoma_M_contig1980.6159.1	Ec-27_005250.1
OG0001696	TRUE	prot_D-dichotoma_M_contig1980.6161.1	Ec-27_005240.1
OG0001697	TRUE	prot_D-dichotoma_M_contig1980.6162.1	Ec-27_005530.1
OG0001698	TRUE	prot_D-dichotoma_M_contig1980.6163.1	Ec-27_005500.1
OG0001699	TRUE	prot_D-dichotoma_M_contig1981.6164.1	Ec-11_001620.1
OG0001700	TRUE	prot_D-dichotoma_M_contig1981.6166.1	Ec-11_001590.1
OG0001701	TRUE	prot_D-dichotoma_M_contig1981.6167.1	Ec-03_004120.1
OG0001702	TRUE	prot_D-dichotoma_M_contig1982.6168.1	Ec-14_006870.1
OG0001703	TRUE	prot_D-dichotoma_M_contig1982.6171.1	Ec-14_006860.1
OG0001704	TRUE	prot_D-dichotoma_M_contig1982.6172.1	Ec-14_006930.1
OG0001705	TRUE	prot_D-dichotoma_M_contig1982.6174.1	Ec-14_005300.1
OG0001706	TRUE	prot_D-dichotoma_M_contig1984.6182.1	Ec-19_003790.1
OG0001707	TRUE	prot_D-dichotoma_M_contig1984.6183.1	Ec-19_003780.1
OG0001708	TRUE	prot_D-dichotoma_M_contig1988.6192.1	Ec-05_004430.1
OG0001709	TRUE	prot_D-dichotoma_M_contig3502.11890.1	Ec-20_001700.1
OG0001710	TRUE	prot_D-dichotoma_M_contig3504.11892.1	Ec-05_004160.1
OG0001711	TRUE	prot_D-dichotoma_M_contig3504.11893.1	Ec-05_004100.1
OG0001712	TRUE	prot_D-dichotoma_M_contig3505.11894.1	Ec-02_006020.1
OG0001713	TRUE	prot_D-dichotoma_M_contig3506.11896.1	Ec-23_004070.1
OG0001714	TRUE	prot_D-dichotoma_M_contig3507.11897.1	Ec-17_003760.1
OG0001715	TRUE	prot_D-dichotoma_M_contig3511.11909.1	Ec-12_008560.1
OG0001716	TRUE	prot_D-dichotoma_M_contig3511.11910.1	Ec-12_008550.1
OG0001717	TRUE	prot_D-dichotoma_M_contig3513.11911.1	Ec-07_000750.1
OG0001718	TRUE	prot_D-dichotoma_M_contig3521.11930.1	Ec-24_001820.1
OG0001719	TRUE	prot_D-dichotoma_M_contig1963.6076.1	Ec-10_003200.1
OG0001720	TRUE	prot_D-dichotoma_M_contig1963.6077.1	Ec-10_003040.1
OG0001721	TRUE	prot_D-dichotoma_M_contig1964.6078.1	Ec-06_009280.1
OG0001722	TRUE	prot_D-dichotoma_M_contig1968.6090.1	Ec-24_003780.1
OG0001723	TRUE	prot_D-dichotoma_M_contig1968.6095.1	Ec-24_003590.1
OG0001724	TRUE	prot_D-dichotoma_M_contig1969.6099.1	Ec-03_002730.1
OG0001725	TRUE	prot_D-dichotoma_M_contig2.6240.1	Ec-26_005470.1
OG0001726	TRUE	prot_D-dichotoma_M_contig2.6241.1	Ec-12_001480.1
OG0001727	TRUE	prot_D-dichotoma_M_contig2.6243.1	Ec-12_001420.1
OG0001728	TRUE	prot_D-dichotoma_M_contig2.6244.1	Ec-12_001400.1
OG0001729	TRUE	prot_D-dichotoma_M_contig2.6247.1	Ec-12_002560.1
OG0001730	TRUE	prot_D-dichotoma_M_contig2.6249.1	Ec-12_002550.1
OG0001731	TRUE	prot_D-dichotoma_M_contig2.6250.1	Ec-12_000900.1
OG0001732	TRUE	prot_D-dichotoma_M_contig2.6252.1	Ec-12_000910.1
OG0001733	TRUE	prot_D-dichotoma_M_contig2.6253.1	Ec-12_000920.1
OG0001734	TRUE	prot_D-dichotoma_M_contig2.6255.1	Ec-12_000970.1
OG0001735	TRUE	prot_D-dichotoma_M_contig2.6256.1	Ec-12_000960.1
OG0001736	TRUE	prot_D-dichotoma_M_contig2.6257.1	Ec-12_005220.1
OG0001737	TRUE	prot_D-dichotoma_M_contig2.6258.1	Ec-12_005240.1
OG0001738	TRUE	prot_D-dichotoma_M_contig2.6259.1	Ec-12_005250.1
OG0001739	TRUE	prot_D-dichotoma_M_contig2.6260.1	Ec-12_005260.1
OG0001740	TRUE	prot_D-dichotoma_M_contig2.6261.1	Ec-12_000040.1
OG0001741	TRUE	prot_D-dichotoma_M_contig2.6262.1	Ec-12_005190.1
OG0001742	TRUE	prot_D-dichotoma_M_contig2.6263.1	Ec-12_002350.1
OG0001743	TRUE	prot_D-dichotoma_M_contig2.6268.1	Ec-12_005090.1
OG0001744	TRUE	prot_D-dichotoma_M_contig2.6270.1	Ec-12_003290.1
OG0001745	TRUE	prot_D-dichotoma_M_contig2.6273.1	Ec-12_003510.1
OG0001746	TRUE	prot_D-dichotoma_M_contig2.6274.1	Ec-12_003500.1
OG0001747	TRUE	prot_D-dichotoma_M_contig2.6275.1	Ec-12_003490.1
OG0001748	TRUE	prot_D-dichotoma_M_contig2.6277.1	Ec-12_001490.1
OG0001749	TRUE	prot_D-dichotoma_M_contig2.6278.1	Ec-12_001500.1
OG0001750	TRUE	prot_D-dichotoma_M_contig2.6280.1	Ec-12_003410.1
OG0001751	TRUE	prot_D-dichotoma_M_contig2.6281.1	Ec-12_003420.1
OG0001752	TRUE	prot_D-dichotoma_M_contig2.6283.1	Ec-12_003430.1
OG0001753	TRUE	prot_D-dichotoma_M_contig2.6284.1	Ec-12_003450.1
OG0001754	TRUE	prot_D-dichotoma_M_contig2.6285.1	Ec-12_003460.1
OG0001755	TRUE	prot_D-dichotoma_M_contig2.6286.1	Ec-12_003470.1
OG0001756	TRUE	prot_D-dichotoma_M_contig2.6287.1	Ec-12_003700.1
OG0001757	TRUE	prot_D-dichotoma_M_contig2.6288.1	Ec-12_001730.1
OG0001758	TRUE	prot_D-dichotoma_M_contig2.6289.1	Ec-12_001720.1
OG0001759	TRUE	prot_D-dichotoma_M_contig2.6290.1	Ec-12_001710.1
OG0001760	TRUE	prot_D-dichotoma_M_contig2.6291.1	Ec-12_001700.1
OG0001761	TRUE	prot_D-dichotoma_M_contig2.6292.1	Ec-12_001690.1
OG0001762	TRUE	prot_D-dichotoma_M_contig2.6294.1	Ec-12_001680.1
OG0001763	TRUE	prot_D-dichotoma_M_contig2583.8896.1	Ec-04_006310.1
OG0001764	TRUE	prot_D-dichotoma_M_contig2583.8897.1	Ec-04_006410.1
OG0001765	TRUE	prot_D-dichotoma_M_contig2589.8905.1	Ec-03_005290.1
OG0001766	TRUE	prot_D-dichotoma_M_contig2593.8928.1	Ec-18_002190.1
OG0001767	TRUE	prot_D-dichotoma_M_contig2593.8930.1	Ec-18_002200.1
OG0001768	TRUE	prot_D-dichotoma_M_contig3893.12857.1	Ec-10_002850.1
OG0001769	TRUE	prot_D-dichotoma_M_contig3903.12916.1	Ec-06_006890.1
OG0001770	TRUE	prot_D-dichotoma_M_contig3903.12917.1	Ec-06_006920.1
OG0001771	TRUE	prot_D-dichotoma_M_contig3907.12921.1	Ec-21_001660.1
OG0001772	TRUE	prot_D-dichotoma_M_contig3909.12923.1	Ec-21_003110.1
OG0001773	TRUE	prot_D-dichotoma_M_contig3912.12935.1	Ec-17_004060.1
OG0001774	TRUE	prot_D-dichotoma_M_contig3912.12936.1	Ec-17_004070.1
OG0001775	TRUE	prot_D-dichotoma_M_contig327.11234.1	Ec-17_002660.1
OG0001776	TRUE	prot_D-dichotoma_M_contig327.11236.1	Ec-17_002630.1
OG0001777	TRUE	prot_D-dichotoma_M_contig327.11238.1	Ec-17_002640.1
OG0001778	TRUE	prot_D-dichotoma_M_contig327.11240.1	Ec-17_004150.1
OG0001779	TRUE	prot_D-dichotoma_M_contig327.11244.1	Ec-17_004130.1
OG0001780	TRUE	prot_D-dichotoma_M_contig328.11270.1	Ec-12_004940.1
OG0001781	TRUE	prot_D-dichotoma_M_contig328.11271.1	Ec-12_000540.1
OG0001782	TRUE	prot_D-dichotoma_M_contig328.11272.1	Ec-12_000530.1
OG0001783	TRUE	prot_D-dichotoma_M_contig328.11274.1	Ec-12_005570.1
OG0001784	TRUE	prot_D-dichotoma_M_contig328.11275.1	Ec-12_005580.1
OG0001785	TRUE	prot_D-dichotoma_M_contig328.11277.1	Ec-12_001810.1
OG0001786	TRUE	prot_D-dichotoma_M_contig328.11278.1	Ec-12_001880.1
OG0001787	TRUE	prot_D-dichotoma_M_contig329.11304.1	Ec-17_001390.1
OG0001788	TRUE	prot_D-dichotoma_M_contig329.11306.1	Ec-17_001490.1
OG0001789	TRUE	prot_D-dichotoma_M_contig329.11308.1	Ec-17_001520.1
OG0001790	TRUE	prot_D-dichotoma_M_contig329.11310.1	Ec-17_001530.1
OG0001791	TRUE	prot_D-dichotoma_M_contig32.11030.1	Ec-21_004360.1
OG0001792	TRUE	prot_D-dichotoma_M_contig32.11032.1	Ec-21_004370.1
OG0001793	TRUE	prot_D-dichotoma_M_contig32.11035.1	Ec-27_006000.1
OG0001794	TRUE	prot_D-dichotoma_M_contig32.11036.1	Ec-21_004130.1
OG0001795	TRUE	prot_D-dichotoma_M_contig32.11038.1	Ec-21_004140.1
OG0001796	TRUE	prot_D-dichotoma_M_contig32.11041.1	Ec-00_009620.1
OG0001797	TRUE	prot_D-dichotoma_M_contig32.11042.1	Ec-21_004050.1
OG0001798	TRUE	prot_D-dichotoma_M_contig32.11043.1	Ec-21_004040.1
OG0001799	TRUE	prot_D-dichotoma_M_contig32.11044.1	Ec-21_004030.1
OG0001800	TRUE	prot_D-dichotoma_M_contig32.11046.1	Ec-21_004060.1
OG0001801	TRUE	prot_D-dichotoma_M_contig32.11047.1	Ec-21_004090.1
OG0001802	TRUE	prot_D-dichotoma_M_contig32.11048.1	Ec-21_004100.1
OG0001803	TRUE	prot_D-dichotoma_M_contig32.11049.1	Ec-21_004510.1
OG0001804	TRUE	prot_D-dichotoma_M_contig32.11050.1	Ec-21_004490.1
OG0001805	TRUE	prot_D-dichotoma_M_contig32.11051.1	Ec-21_004480.1
OG0001806	TRUE	prot_D-dichotoma_M_contig32.11053.1	Ec-21_004460.1
OG0001807	TRUE	prot_D-dichotoma_M_contig32.11054.1	Ec-21_004450.1
OG0001808	TRUE	prot_D-dichotoma_M_contig1494.3540.1	Ec-26_001440.1
OG0001809	TRUE	prot_D-dichotoma_M_contig1495.3541.1	Ec-12_002980.1
OG0001810	TRUE	prot_D-dichotoma_M_contig1495.3542.1	Ec-12_002970.1
OG0001811	TRUE	prot_D-dichotoma_M_contig1496.3546.1	Ec-11_005970.1
OG0001812	TRUE	prot_D-dichotoma_M_contig1496.3547.1	Ec-11_005940.1
OG0001813	TRUE	prot_D-dichotoma_M_contig1497.3550.1	Ec-02_003930.1
OG0001814	TRUE	prot_D-dichotoma_M_contig1497.3551.1	Ec-20_001040.1
OG0001815	TRUE	prot_D-dichotoma_M_contig1498.3555.1	Ec-06_007620.1
OG0001816	TRUE	prot_D-dichotoma_M_contig1498.3558.1	Ec-06_007470.1
OG0001817	TRUE	prot_D-dichotoma_M_contig1498.3559.1	Ec-06_007600.1
OG0001818	TRUE	prot_D-dichotoma_M_contig1498.3560.1	Ec-06_007610.1
OG0001819	TRUE	prot_D-dichotoma_M_contig1500.3603.1	Ec-05_001580.1
OG0001820	TRUE	prot_D-dichotoma_M_contig496.15181.1	Ec-11_004160.1
OG0001821	TRUE	prot_D-dichotoma_M_contig496.15182.1	Ec-11_004170.1
OG0001822	TRUE	prot_D-dichotoma_M_contig496.15183.1	Ec-11_004190.1
OG0001823	TRUE	prot_D-dichotoma_M_contig496.15185.1	Ec-11_006280.1
OG0001824	TRUE	prot_D-dichotoma_M_contig496.15188.1	Ec-11_006270.1
OG0001825	TRUE	prot_D-dichotoma_M_contig496.15189.1	Ec-11_006160.1
OG0001826	TRUE	prot_D-dichotoma_M_contig496.15190.1	Ec-11_006170.1
OG0001827	TRUE	prot_D-dichotoma_M_contig497.15197.1	Ec-03_000790.1
OG0001828	TRUE	prot_D-dichotoma_M_contig497.15200.1	Ec-03_000890.1
OG0001829	TRUE	prot_D-dichotoma_M_contig497.15201.1	Ec-03_000900.1
OG0001830	TRUE	prot_D-dichotoma_M_contig498.15213.1	Ec-14_000120.1
OG0001831	TRUE	prot_D-dichotoma_M_contig498.15214.1	Ec-14_000090.1
OG0001832	TRUE	prot_D-dichotoma_M_contig498.15219.1	Ec-08_004210.1
OG0001833	TRUE	prot_D-dichotoma_M_contig498.15221.1	Ec-08_004110.1
OG0001834	TRUE	prot_D-dichotoma_M_contig2832.9787.1	Ec-06_004110.1
OG0001835	TRUE	prot_D-dichotoma_M_contig2832.9788.1	Ec-06_001800.1
OG0001836	TRUE	prot_D-dichotoma_M_contig2832.9789.1	Ec-06_001810.1
OG0001837	TRUE	prot_D-dichotoma_M_contig2832.9790.1	Ec-06_001230.1
OG0001838	TRUE	prot_D-dichotoma_M_contig2835.9797.1	Ec-24_004180.1
OG0001839	TRUE	prot_D-dichotoma_M_contig2835.9798.1	Ec-24_004200.1
OG0001840	TRUE	prot_D-dichotoma_M_contig2837.9802.1	Ec-08_001630.1
OG0001841	TRUE	prot_D-dichotoma_M_contig2837.9803.1	Ec-08_001600.1
OG0001842	TRUE	prot_D-dichotoma_M_contig2840.9810.1	Ec-28_000330.1
OG0001843	TRUE	prot_D-dichotoma_M_contig907.19810.1	Ec-27_002690.1
OG0001844	TRUE	prot_D-dichotoma_M_contig907.19812.1	Ec-27_002670.1
OG0001845	TRUE	prot_D-dichotoma_M_contig909.19817.1	Ec-11_000460.1
OG0001846	TRUE	prot_D-dichotoma_M_contig909.19818.1	Ec-11_000490.1
OG0001847	TRUE	prot_D-dichotoma_M_contig909.19819.1	Ec-11_000540.1
OG0001848	TRUE	prot_D-dichotoma_M_contig909.19820.1	Ec-11_000530.1
OG0001849	TRUE	prot_D-dichotoma_M_contig909.19823.1	Ec-11_000500.1
OG0001850	TRUE	prot_D-dichotoma_M_contig909.19824.1	Ec-07_003390.1
OG0001851	TRUE	prot_D-dichotoma_M_contig909.19825.1	Ec-11_001020.1
OG0001852	TRUE	prot_D-dichotoma_M_contig910.19848.1	Ec-03_003010.1
OG0001853	TRUE	prot_D-dichotoma_M_contig911.19851.1	Ec-14_000680.1
OG0001854	TRUE	prot_D-dichotoma_M_contig911.19853.1	Ec-14_000690.1
OG0001855	TRUE	prot_D-dichotoma_M_contig911.19857.1	Ec-14_000600.1
OG0001856	TRUE	prot_D-dichotoma_M_contig911.19858.1	Ec-14_000580.1
OG0001857	TRUE	prot_D-dichotoma_M_contig911.19862.1	Ec-14_000570.1
OG0001858	TRUE	prot_D-dichotoma_M_contig1562.3943.1	Ec-03_004450.1
OG0001859	TRUE	prot_D-dichotoma_M_contig1563.3948.1	Ec-26_005150.1
OG0001860	TRUE	prot_D-dichotoma_M_contig1564.3955.1	Ec-23_001120.1
OG0001861	TRUE	prot_D-dichotoma_M_contig1564.3956.1	Ec-23_001100.1
OG0001862	TRUE	prot_D-dichotoma_M_contig1565.3960.1	Ec-24_001890.1
OG0001863	TRUE	prot_D-dichotoma_M_contig1566.3962.1	Ec-00_011470.1
OG0001864	TRUE	prot_D-dichotoma_M_contig1566.3963.1	Ec-26_001020.1
OG0001865	TRUE	prot_D-dichotoma_M_contig1566.3964.1	Ec-26_000170.1
OG0001866	TRUE	prot_D-dichotoma_M_contig1566.3966.1	Ec-26_001140.1
OG0001867	TRUE	prot_D-dichotoma_M_contig1568.3971.1	Ec-11_000400.1
OG0001868	TRUE	prot_D-dichotoma_M_contig124.1895.1	Ec-04_000060.1
OG0001869	TRUE	prot_D-dichotoma_M_contig124.1899.1	Ec-04_000040.1
OG0001870	TRUE	prot_D-dichotoma_M_contig124.1900.1	Ec-04_000030.1
OG0001871	TRUE	prot_D-dichotoma_M_contig124.1906.1	Ec-04_000130.1
OG0001872	TRUE	prot_D-dichotoma_M_contig124.1907.1	Ec-04_000140.1
OG0001873	TRUE	prot_D-dichotoma_M_contig125.1953.1	Ec-02_000700.1
OG0001874	TRUE	prot_D-dichotoma_M_contig125.1954.1	Ec-02_000730.1
OG0001875	TRUE	prot_D-dichotoma_M_contig125.1955.1	Ec-02_000740.1
OG0001876	TRUE	prot_D-dichotoma_M_contig125.1956.1	Ec-02_000430.1
OG0001877	TRUE	prot_D-dichotoma_M_contig1624.4365.1	Ec-02_001660.1
OG0001878	TRUE	prot_D-dichotoma_M_contig1627.4379.1	Ec-01_006740.1
OG0001879	TRUE	prot_D-dichotoma_M_contig1627.4380.1	Ec-01_006730.1
OG0001880	TRUE	prot_D-dichotoma_M_contig1627.4381.1	Ec-01_006720.1
OG0001881	TRUE	prot_D-dichotoma_M_contig1627.4382.1	Ec-01_006710.1
OG0001882	TRUE	prot_D-dichotoma_M_contig1627.4383.1	Ec-01_006700.1
OG0001883	TRUE	prot_D-dichotoma_M_contig1627.4384.1	Ec-01_008350.1
OG0001884	TRUE	prot_D-dichotoma_M_contig1630.4405.1	Ec-22_001710.1
OG0001885	TRUE	prot_D-dichotoma_M_contig1630.4406.1	Ec-04_003010.1
OG0001886	TRUE	prot_D-dichotoma_M_contig4885.15039.1	Ec-00_008440.1
OG0001887	TRUE	prot_D-dichotoma_M_contig4897.15061.1	Ec-01_012150.1
OG0001888	TRUE	prot_D-dichotoma_M_contig4897.15063.1	Ec-01_012160.1
OG0001889	TRUE	prot_D-dichotoma_M_contig74.18242.1	Ec-24_002390.1
OG0001890	TRUE	prot_D-dichotoma_M_contig74.18243.1	Ec-24_001670.1
OG0001891	TRUE	prot_D-dichotoma_M_contig74.18245.1	Ec-24_001720.1
OG0001892	TRUE	prot_D-dichotoma_M_contig74.18247.1	Ec-05_001860.1
OG0001893	TRUE	prot_D-dichotoma_M_contig75.18330.1	Ec-17_001360.1
OG0001894	TRUE	prot_D-dichotoma_M_contig75.18332.1	Ec-17_001350.1
OG0001895	TRUE	prot_D-dichotoma_M_contig75.18333.1	Ec-17_001340.1
OG0001896	TRUE	prot_D-dichotoma_M_contig75.18334.1	Ec-17_001330.1
OG0001897	TRUE	prot_D-dichotoma_M_contig75.18335.1	Ec-24_000950.1
OG0001898	TRUE	prot_D-dichotoma_M_contig75.18336.1	Ec-17_001470.1
OG0001899	TRUE	prot_D-dichotoma_M_contig75.18337.1	Ec-17_001460.1
OG0001900	TRUE	prot_D-dichotoma_M_contig75.18338.1	Ec-17_001450.1
OG0001901	TRUE	prot_D-dichotoma_M_contig75.18339.1	Ec-17_001440.1
OG0001902	TRUE	prot_D-dichotoma_M_contig75.18340.1	Ec-17_001430.1
OG0001903	TRUE	prot_D-dichotoma_M_contig75.18342.1	Ec-17_001510.1
OG0001904	TRUE	prot_D-dichotoma_M_contig75.18343.1	Ec-06_000130.1
OG0001905	TRUE	prot_D-dichotoma_M_contig75.18344.1	Ec-17_001500.1
OG0001906	TRUE	prot_D-dichotoma_M_contig1032.353.1	Ec-23_002970.1
OG0001907	TRUE	prot_D-dichotoma_M_contig1033.359.1	Ec-01_011820.1
OG0001908	TRUE	prot_D-dichotoma_M_contig1033.360.1	Ec-01_011830.1
OG0001909	TRUE	prot_D-dichotoma_M_contig1033.361.1	Ec-01_011980.1
OG0001910	TRUE	prot_D-dichotoma_M_contig1033.363.1	Ec-01_011970.1
OG0001911	TRUE	prot_D-dichotoma_M_contig1033.365.1	Ec-01_011960.1
OG0001912	TRUE	prot_D-dichotoma_M_contig1033.366.1	Ec-01_011950.1
OG0001913	TRUE	prot_D-dichotoma_M_contig1033.367.1	Ec-01_011940.1
OG0001914	TRUE	prot_D-dichotoma_M_contig1033.368.1	Ec-01_011930.1
OG0001915	TRUE	prot_D-dichotoma_M_contig1033.369.1	Ec-01_011920.1
OG0001916	TRUE	prot_D-dichotoma_M_contig1033.370.1	Ec-01_011910.1
OG0001917	TRUE	prot_D-dichotoma_M_contig1034.371.1	Ec-24_003580.1
OG0001918	TRUE	prot_D-dichotoma_M_contig1034.375.1	Ec-24_002970.1
OG0001919	TRUE	prot_D-dichotoma_M_contig1034.376.1	Ec-24_003100.1
OG0001920	TRUE	prot_D-dichotoma_M_contig1036.390.1	Ec-19_003400.1
OG0001921	TRUE	prot_D-dichotoma_M_contig1729.4925.1	Ec-11_000980.1
OG0001922	TRUE	prot_D-dichotoma_M_contig1729.4926.1	Ec-11_000970.1
OG0001923	TRUE	prot_D-dichotoma_M_contig1731.4942.1	Ec-18_002950.1
OG0001924	TRUE	prot_D-dichotoma_M_contig1731.4944.1	Ec-18_003950.1
OG0001925	TRUE	prot_D-dichotoma_M_contig1732.4946.1	Ec-22_000820.1
OG0001926	TRUE	prot_D-dichotoma_M_contig1732.4947.1	Ec-22_000580.1
OG0001927	TRUE	prot_D-dichotoma_M_contig1734.4951.1	Ec-08_004100.1
OG0001928	TRUE	prot_D-dichotoma_M_contig1736.4961.1	Ec-26_006160.1
OG0001929	TRUE	prot_D-dichotoma_M_contig1736.4962.1	Ec-26_006170.1
OG0001930	TRUE	prot_D-dichotoma_M_contig1736.4963.1	Ec-26_006180.1
OG0001931	TRUE	prot_D-dichotoma_M_contig1736.4965.1	Ec-26_006300.1
OG0001932	TRUE	prot_D-dichotoma_M_contig1736.4966.1	Ec-26_006320.1
OG0001933	TRUE	prot_D-dichotoma_M_contig1736.4968.1	Ec-26_006330.1
OG0001934	TRUE	prot_D-dichotoma_M_contig197.6100.1	Ec-27_004410.1
OG0001935	TRUE	prot_D-dichotoma_M_contig197.6101.1	Ec-27_002130.1
OG0001936	TRUE	prot_D-dichotoma_M_contig197.6104.1	Ec-27_002150.1
OG0001937	TRUE	prot_D-dichotoma_M_contig197.6105.1	Ec-27_002110.1
OG0001938	TRUE	prot_D-dichotoma_M_contig197.6107.1	Ec-27_002090.1
OG0001939	TRUE	prot_D-dichotoma_M_contig197.6108.1	Ec-27_002100.1
OG0001940	TRUE	prot_D-dichotoma_M_contig197.6110.1	Ec-27_002070.1
OG0001941	TRUE	prot_D-dichotoma_M_contig197.6111.1	Ec-27_001910.1
OG0001942	TRUE	prot_D-dichotoma_M_contig198.6141.1	Ec-21_004660.1
OG0001943	TRUE	prot_D-dichotoma_M_contig198.6142.1	Ec-21_006140.1
OG0001944	TRUE	prot_D-dichotoma_M_contig198.6144.1	Ec-21_006110.1
OG0001945	TRUE	prot_D-dichotoma_M_contig198.6145.1	Ec-21_006100.1
OG0001946	TRUE	prot_D-dichotoma_M_contig198.6149.1	Ec-21_006080.1
OG0001947	TRUE	prot_D-dichotoma_M_contig198.6150.1	Ec-21_006070.1
OG0001948	TRUE	prot_D-dichotoma_M_contig198.6151.1	Ec-21_006120.1
OG0001949	TRUE	prot_D-dichotoma_M_contig198.6154.1	Ec-21_006060.1
OG0001950	TRUE	prot_D-dichotoma_M_contig2099.6820.1	Ec-01_005000.1
OG0001951	TRUE	prot_D-dichotoma_M_contig2099.6821.1	Ec-01_005010.1
OG0001952	TRUE	prot_D-dichotoma_M_contig2099.6822.1	Ec-01_005090.1
OG0001953	TRUE	prot_D-dichotoma_M_contig2099.6823.1	Ec-01_005020.1
OG0001954	TRUE	prot_D-dichotoma_M_contig2099.6824.1	Ec-01_005040.1
OG0001955	TRUE	prot_D-dichotoma_M_contig2099.6825.1	Ec-01_005060.1
OG0001956	TRUE	prot_D-dichotoma_M_contig2099.6826.1	Ec-01_005070.1
OG0001957	TRUE	prot_D-dichotoma_M_contig2102.6879.1	Ec-18_001370.1
OG0001958	TRUE	prot_D-dichotoma_M_contig2107.6890.1	Ec-06_003600.1
OG0001959	TRUE	prot_D-dichotoma_M_contig2107.6891.1	Ec-06_003610.1
OG0001960	TRUE	prot_D-dichotoma_M_contig2107.6892.1	Ec-06_003270.1
OG0001961	TRUE	prot_D-dichotoma_M_contig1516.3673.1	Ec-26_002680.1
OG0001962	TRUE	prot_D-dichotoma_M_contig1518.3679.1	Ec-19_003280.1
OG0001963	TRUE	prot_D-dichotoma_M_contig1518.3681.1	Ec-19_003270.1
OG0001964	TRUE	prot_D-dichotoma_M_contig1518.3682.1	Ec-19_003590.1
OG0001965	TRUE	prot_D-dichotoma_M_contig1519.3684.1	Ec-02_001280.1
OG0001966	TRUE	prot_D-dichotoma_M_contig1519.3685.1	Ec-02_001650.1
OG0001967	TRUE	prot_D-dichotoma_M_contig1519.3687.1	Ec-02_001560.1
OG0001968	TRUE	prot_D-dichotoma_M_contig1521.3711.1	Ec-19_000540.1
OG0001969	TRUE	prot_D-dichotoma_M_contig1521.3712.1	Ec-19_000510.1
OG0001970	TRUE	prot_D-dichotoma_M_contig1521.3713.1	Ec-19_000520.1
OG0001971	TRUE	prot_D-dichotoma_M_contig1522.3714.1	Ec-18_001300.1
OG0001972	TRUE	prot_D-dichotoma_M_contig1522.3715.1	Ec-18_001520.1
OG0001973	TRUE	prot_D-dichotoma_M_contig1522.3718.1	Ec-18_001500.1
OG0001974	TRUE	prot_D-dichotoma_M_contig1522.3720.1	Ec-18_001320.1
OG0001975	TRUE	prot_D-dichotoma_M_contig1522.3721.1	Ec-18_001310.1
OG0001976	TRUE	prot_D-dichotoma_M_contig213.7013.1	Ec-05_002370.1
OG0001977	TRUE	prot_D-dichotoma_M_contig213.7015.1	Ec-05_002360.1
OG0001978	TRUE	prot_D-dichotoma_M_contig213.7016.1	Ec-05_002840.1
OG0001979	TRUE	prot_D-dichotoma_M_contig214.7051.1	Ec-00_006320.1
OG0001980	TRUE	prot_D-dichotoma_M_contig215.7105.1	Ec-26_006130.1
OG0001981	TRUE	prot_D-dichotoma_M_contig215.7106.1	Ec-26_005970.1
OG0001982	TRUE	prot_D-dichotoma_M_contig215.7107.1	Ec-26_005990.1
OG0001983	TRUE	prot_D-dichotoma_M_contig215.7115.1	Ec-26_004680.1
OG0001984	TRUE	prot_D-dichotoma_M_contig215.7117.1	Ec-26_004690.1
OG0001985	TRUE	prot_D-dichotoma_M_contig1387.2848.1	Ec-14_006650.1
OG0001986	TRUE	prot_D-dichotoma_M_contig1387.2849.1	Ec-14_004320.1
OG0001987	TRUE	prot_D-dichotoma_M_contig1387.2850.1	Ec-14_004330.1
OG0001988	TRUE	prot_D-dichotoma_M_contig1387.2852.1	Ec-14_002800.1
OG0001989	TRUE	prot_D-dichotoma_M_contig1390.2888.1	Ec-06_000790.1
OG0001990	TRUE	prot_D-dichotoma_M_contig1390.2889.1	Ec-06_000800.1
OG0001991	TRUE	prot_D-dichotoma_M_contig1390.2890.1	Ec-06_000810.1
OG0001992	TRUE	prot_D-dichotoma_M_contig1390.2891.1	Ec-06_000780.1
OG0001993	TRUE	prot_D-dichotoma_M_contig1390.2892.1	Ec-06_000770.1
OG0001994	TRUE	prot_D-dichotoma_M_contig1390.2894.1	Ec-06_003850.1
OG0001995	TRUE	prot_D-dichotoma_M_contig1390.2895.1	Ec-06_003840.1
OG0001996	TRUE	prot_D-dichotoma_M_contig1390.2898.1	Ec-06_003830.1
OG0001997	TRUE	prot_D-dichotoma_M_contig1392.2902.1	Ec-10_001130.1
OG0001998	TRUE	prot_D-dichotoma_M_contig1392.2903.1	Ec-10_001110.1
[truncated: 23,888 more rows]
