# Supplementary material for: Life-cycle-related gene expression patterns in the brown algae
Source: bioRxiv preprint, doi:10.1101/2025.04.25.649966, version 3 (2025-08-12)
Supplement: Table S9 [file 649966_file28.xlsx]

## Sheet: Table S3_Read_counts_Dictyota
	RNA-seq sample
Gene	Dictyota_FEMALE_eggs_Rep1	Dictyota_FEMALE_eggs_Rep2	Dictyota_FEMALE_eggs_Rep3	Dictyota_MALE_sperm_Rep1	Dictyota_MALE_sperm_Rep2	Dictyota_MALE_sperm_Rep3	Dictyota_SP_zygote_Rep1	Dictyota_SP_zygote_Rep2	Dictyota_SP_zygote_Rep3	Dictyota_SP_embryo_Rep1	Dictyota_SP_embryo_Rep2	Dictyota_SP_embryo_Rep3	Dictyota_SP_Rep1	Dictyota_SP_Rep2	Dictyota_SP_Rep3	Dictyota_SP_Rep4	Dictyota_SP_Rep5	Dictyota_FEMALE_Rep1	Dictyota_FEMALE_Rep2	Dictyota_FEMALE_Rep3	Dictyota_FEMALE_Rep4	Dictyota_FEMALE_Rep5	Dictyota_MALE_Rep1	Dictyota_MALE_Rep2	Dictyota_MALE_Rep3	Dictyota_MALE_Rep4	Dictyota_MALE_Rep5
mRNA_D-dichotoma_M_contig375.12517.1	29	6	11	22	3	5	44	6	17	140	22	45	1553	1139	896	1064	919	482	1513	1199	89	285	2543	1673	1537	1283	429
mRNA_D-dichotoma_M_contig375.12518.1	2	0	1	65	13	13	4	0	0	13	1	6	20	21	14	34	5	29	32	26	13	11	91	48	44	34	9
mRNA_D-dichotoma_M_contig375.12520.1	13	6	11	13	5	3	9	4	6	14	3	4	296	898	570	666	512	366	1078	815	179	154	854	481	320	358	274
mRNA_D-dichotoma_M_contig376.12538.1	0	1	2	4	0	0	2	1	2	4	0	3	279	105	317	653	493	166	178	228	134	130	203	102	74	291	247
mRNA_D-dichotoma_M_contig376.12539.1	4	3	4	4	2	7	3	7	9	3	11	2	660	197	761	453	369	355	405	461	100	88	529	322	169	219	180
mRNA_D-dichotoma_M_contig376.12543.1	425	220	280	0	0	0	149	246	161	41	17	40	1511	694	2052	1703	702	544	1356	1192	424	300	1292	864	539	717	677
mRNA_D-dichotoma_M_contig377.12555.1	0	0	0	0	0	0	0	0	0	1	0	0	0	5	1	0	0	0	4	3	0	0	2	8	1	0	0
mRNA_D-dichotoma_M_contig377.12559.1	0	0	0	0	0	0	0	0	0	1	0	0	35	33	57	14	36	17	62	28	0	9	29	34	19	8	11
mRNA_D-dichotoma_M_contig1230.1828.1	14	7	6	0	0	0	3	0	5	20	9	10	1117	254	607	656	526	330	235	302	439	152	1453	486	298	678	796
mRNA_D-dichotoma_M_contig1230.1830.1	0	0	1	0	0	0	2	0	1	2	4	0	156	44	83	81	52	41	19	29	33	16	237	51	42	49	51
mRNA_D-dichotoma_M_contig1232.1839.1	406	240	289	402	270	167	525	193	294	447	205	249	8209	6435	6547	8863	5029	4845	7885	7129	4164	4143	12719	6380	4710	6412	6511
mRNA_D-dichotoma_M_contig1232.1840.1	51	41	44	56	32	24	44	23	55	61	21	50	968	491	856	546	278	407	732	759	151	157	1042	429	268	304	262
mRNA_D-dichotoma_M_contig1234.1853.1	88	72	75	1016	487	642	161	111	157	175	93	106	2389	1624	4127	3387	1958	1497	2298	2449	1008	966	2773	2628	1724	3322	1527
mRNA_D-dichotoma_M_contig1234.1854.1	0	0	0	2	2	2	0	0	0	1	4	1	6	2	3	4	0	2	2	3	0	0	1	12	18	4	4
mRNA_D-dichotoma_M_contig1235.1858.1	2	1	1	40	0	36	10	1	11	5	0	3	6	0	37	10	0	3	31	18	0	0	24	19	4	14	27
mRNA_D-dichotoma_M_contig1235.1859.1	5	0	6	110	3	84	17	5	28	10	3	4	48	3	150	23	0	3	76	53	2	9	70	44	16	19	83
mRNA_D-dichotoma_M_contig1235.1860.1	88	40	72	1	0	0	50	50	31	42	9	13	2031	2106	2997	5411	3499	1914	2356	2217	238	722	4011	3320	3421	3639	1076
mRNA_D-dichotoma_M_contig1235.1866.1	0	1	0	0	1	0	0	0	0	8	0	0	30	40	7	43	10	19	37	29	6	13	58	39	18	29	9
mRNA_D-dichotoma_M_contig1533.3777.1	22	6	5	0	0	0	20	9	5	10	1	5	1031	1358	456	618	571	1254	1182	771	1321	956	984	1483	1816	897	477
mRNA_D-dichotoma_M_contig1534.3779.1	0	0	0	0	0	0	0	0	0	0	0	0	7	1	3	2	0	0	0	0	0	0	3	5	12	3	0
mRNA_D-dichotoma_M_contig11.869.1	0	3	2	0	0	0	2	0	0	6	0	4	222	79	307	246	290	75	207	168	58	53	151	123	94	216	160
mRNA_D-dichotoma_M_contig368.12328.1	0	0	0	0	0	0	0	0	0	0	0	0	4	7	48	26	0	0	40	12	0	0	340	23	12	14	28
mRNA_D-dichotoma_M_contig368.12329.1	0	0	0	0	4	0	0	0	0	0	0	0	0	4	13	9	11	1	22	2	3	3	126	5	2	2	2
mRNA_D-dichotoma_M_contig368.12330.1	3	5	2	0	0	0	2	10	2	0	3	0	32	160	160	248	119	66	109	63	38	5	53	141	107	106	33
mRNA_D-dichotoma_M_contig368.12332.1	0	1	0	237	52	93	1	3	1	0	0	0	0	0	8	1	0	0	1	1	1	0	2	1	2	0	1
mRNA_D-dichotoma_M_contig368.12336.1	7	0	0	0	0	0	0	0	0	1	0	0	11	55	10	57	45	29	30	23	35	30	41	45	45	34	58
mRNA_D-dichotoma_M_contig369.12366.1	37	7	14	0	0	0	12	2	18	4	0	0	24	2	242	59	0	5	37	48	2	4	0	8	0	0	16
mRNA_D-dichotoma_M_contig369.12377.1	52	23	31	0	0	0	49	24	39	68	24	42	292	349	1028	855	541	321	476	407	192	236	1152	401	370	583	474
mRNA_D-dichotoma_M_contig370.12416.1	16	3	6	0	0	0	5	14	4	9	6	7	54	25	155	50	18	19	78	63	15	13	24	16	2	11	11
mRNA_D-dichotoma_M_contig474.14776.1	16	13	14	0	0	1	26	9	13	18	9	11	20	80	62	93	59	42	104	81	93	93	84	74	44	108	72
mRNA_D-dichotoma_M_contig475.14784.1	3	2	2	0	0	0	1	8	9	7	1	2	58	84	214	104	152	25	113	81	41	13	96	28	21	30	52
mRNA_D-dichotoma_M_contig475.14787.1	628	82	415	3020	502	2023	104	122	166	15	4	3	182	10	1494	436	2	89	555	701	25	91	101	125	13	788	266
mRNA_D-dichotoma_M_contig476.14800.1	0	0	0	42	0	20	1	0	0	2	0	0	522	559	840	311	386	1	0	0	0	1	1239	1148	961	436	423
mRNA_D-dichotoma_M_contig476.14803.1	0	0	0	32	7	8	0	0	0	0	0	0	0	0	0	0	0	0	0	0	0	0	4	5	1	11	0
mRNA_D-dichotoma_M_contig10.41.1	20	19	17	3403	940	2332	19	17	4	46	20	21	10	64	104	251	78	98	116	122	7	45	33	83	101	412	76
mRNA_D-dichotoma_M_contig10.42.1	0	0	0	746	107	294	2	1	2	7	4	1	50	26	26	95	39	46	52	48	4	21	47	29	30	85	11
mRNA_D-dichotoma_M_contig10.44.1	10	3	5	1076	316	925	8	12	14	19	4	8	136	155	180	519	219	280	281	314	52	165	223	210	172	683	212
mRNA_D-dichotoma_M_contig10.55.1	4	1	6	19	4	17	3	2	4	5	0	1	64	8	460	89	0	5	97	54	9	16	22	38	3	69	180
mRNA_D-dichotoma_M_contig10.65.1	0	0	0	0	0	0	0	0	0	2	0	0	0	17	0	3	0	1	6	6	2	1	14	4	9	6	6
mRNA_D-dichotoma_M_contig10.73.1	0	0	0	8	0	0	0	0	0	0	0	0	0	0	0	2	0	0	0	0	0	0	0	0	0	0	0
mRNA_D-dichotoma_M_contig9.19739.1	14	4	3	0	0	0	13	8	8	23	8	7	340	108	113	88	253	162	62	63	53	137	99	106	76	102	161
mRNA_D-dichotoma_M_contig9.19740.1	5	5	1	0	0	0	18	3	8	19	7	8	248	53	96	79	210	162	56	47	54	84	91	53	50	61	132
mRNA_D-dichotoma_M_contig9.19745.1	12	5	10	0	0	0	9	3	6	3	1	4	51	142	139	228	114	30	157	139	52	55	184	190	103	100	63
mRNA_D-dichotoma_M_contig1436.3190.1	0	0	0	0	0	0	0	0	0	0	0	0	0	0	0	0	0	0	0	0	0	0	0	0	0	0	0
mRNA_D-dichotoma_M_contig1436.3191.1	0	0	0	1	0	0	4	0	0	1	0	0	0	2	0	0	0	1	1	0	0	0	0	0	2	2	0
mRNA_D-dichotoma_M_contig1439.3207.1	0	0	0	0	0	0	0	0	0	0	0	0	10	0	0	2	0	1	0	0	0	0	0	198	23	11	3
mRNA_D-dichotoma_M_contig1441.3229.1	0	0	0	0	0	0	0	0	0	0	0	0	0	2	0	0	0	1	0	0	0	0	0	0	0	0	0
mRNA_D-dichotoma_M_contig1441.3230.1	0	0	0	0	0	0	2	0	0	1	0	0	0	0	0	0	0	0	0	0	0	0	0	0	0	0	0
mRNA_D-dichotoma_M_contig1442.3242.1	0	2	0	0	0	0	2	0	1	19	2	7	156	40	66	54	74	16	12	14	23	19	104	16	103	85	31
mRNA_D-dichotoma_M_contig556.16260.1	8	5	4	1	0	0	63	14	18	38	7	16	123	52	128	79	48	52	155	102	41	28	214	77	80	76	55
mRNA_D-dichotoma_M_contig556.16261.1	3	0	4	0	0	0	24	5	9	19	10	3	49	30	49	65	44	41	67	49	43	23	95	57	48	71	42
mRNA_D-dichotoma_M_contig556.16268.1	51	21	38	98	16	67	54	37	42	85	26	38	2106	2045	2146	2107	1670	2115	2158	2339	1832	1802	2238	2360	2702	1849	1838
mRNA_D-dichotoma_M_contig556.16272.1	14	12	13	204	11	129	23	19	46	37	28	24	5	2	4	3	0	3	23	4	3	6	8	55	6	76	199
mRNA_D-dichotoma_M_contig556.16273.1	7	1	0	47	4	39	18	2	9	11	7	8	0	1	0	1	0	1	8	2	0	2	4	7	0	18	50
mRNA_D-dichotoma_M_contig557.16283.1	87	28	66	0	0	0	45	31	46	25	9	4	1151	541	1337	1092	1336	783	1406	1208	322	463	1742	936	1080	940	607
mRNA_D-dichotoma_M_contig558.16289.1	23	7	9	0	0	0	9	8	4	10	1	1	213	223	233	633	1090	145	167	168	35	116	674	300	293	656	278
mRNA_D-dichotoma_M_contig559.16308.1	0	0	0	14	3	9	2	0	0	0	0	0	0	0	0	0	0	0	0	0	0	0	0	23	0	33	54
mRNA_D-dichotoma_M_contig559.16311.1	0	0	3	8	1	11	10	0	2	6	0	0	9	31	46	38	23	23	52	21	21	6	88	57	42	29	79
mRNA_D-dichotoma_M_contig5381.15969.1	0	0	0	0	0	0	4	0	5	3	0	0	116	20	97	56	88	53	93	101	150	55	80	49	39	72	88
mRNA_D-dichotoma_M_contig5389.15972.1	28	26	38	21	3	11	134	53	102	203	102	87	1338	1060	900	1506	942	682	1230	1494	1275	793	1827	1292	1075	1404	1432
mRNA_D-dichotoma_M_contig5389.15973.1	14	1	5	2	0	0	17	11	15	40	8	17	204	163	211	269	266	97	215	226	252	157	313	183	185	253	274
mRNA_D-dichotoma_M_contig5399.15987.1	5	1	3	0	0	2	19	1	1	19	4	0	141	138	109	105	64	154	194	140	36	49	176	235	172	83	45
mRNA_D-dichotoma_M_contig5413.16038.1	0	0	0	0	2	0	0	0	0	0	0	0	1	6	2	9	8	6	9	12	0	3	6	5	5	8	7
mRNA_D-dichotoma_M_contig5413.16039.1	0	0	0	0	0	0	2	0	0	0	0	0	5	10	5	3	0	1	6	9	1	3	6	8	2	1	1
mRNA_D-dichotoma_M_contig5427.16048.1	0	0	0	0	0	0	0	0	0	0	0	0	0	0	0	0	0	1	0	0	0	0	0	0	0	0	0
mRNA_D-dichotoma_M_contig809.18934.1	263	109	102	0	1	0	163	27	30	46	14	26	780	834	674	602	422	502	608	612	707	607	727	562	528	517	847
mRNA_D-dichotoma_M_contig810.18958.1	3	0	0	13	7	4	1	0	1	1	0	3	0	7	4	10	2	1	7	2	0	1	2	4	9	7	6
mRNA_D-dichotoma_M_contig811.18968.1	7	7	9	1	0	0	19	0	3	8	1	2	9	17	11	7	6	17	19	17	12	11	6	23	12	12	5
mRNA_D-dichotoma_M_contig812.18971.1	0	0	0	0	0	0	1	0	0	1	0	0	0	0	0	0	0	0	0	0	0	0	0	0	0	0	0
mRNA_D-dichotoma_M_contig812.18972.1	3	0	0	0	0	0	2	0	0	12	0	0	1	0	0	0	0	0	1	0	0	0	0	1	6	3	0
mRNA_D-dichotoma_M_contig813.18975.1	2	0	1	0	0	0	11	0	1	1	0	0	8	52	16	59	56	21	8	5	4	14	17	36	43	28	10
mRNA_D-dichotoma_M_contig813.18977.1	12	2	5	0	0	0	13	4	8	7	1	2	0	0	1	0	0	0	2	1	0	1	1	0	0	0	0
mRNA_D-dichotoma_M_contig813.18978.1	14	4	6	0	0	0	18	1	0	1	1	1	0	0	2	1	0	2	5	0	0	4	2	0	2	1	0
mRNA_D-dichotoma_M_contig1833.5433.1	0	0	1	0	0	0	0	0	0	1	0	0	138	123	52	72	68	87	95	65	11	25	98	97	80	69	42
mRNA_D-dichotoma_M_contig1833.5434.1	0	0	0	0	0	0	0	0	0	0	0	1	59	62	21	58	23	42	65	39	3	15	54	52	42	52	22
mRNA_D-dichotoma_M_contig1834.5437.1	0	0	0	0	0	0	0	0	0	0	0	0	0	0	0	0	0	1	0	1	0	0	0	0	0	0	0
mRNA_D-dichotoma_M_contig1834.5438.1	0	0	0	1	0	1	1	0	0	0	0	0	0	9	14	3	1	3	5	7	3	4	68	34	50	42	33
mRNA_D-dichotoma_M_contig1837.5447.1	52	9	22	65	32	18	59	17	42	53	16	23	490	865	939	873	413	578	781	698	325	311	994	831	854	650	373
mRNA_D-dichotoma_M_contig1838.5451.1	24	3	17	1	0	0	40	9	20	14	4	6	754	2757	912	1740	866	1393	1916	1786	443	573	1686	2753	1824	1281	611
mRNA_D-dichotoma_M_contig1839.5453.1	31	9	18	5	3	10	22	22	19	14	9	6	320	296	573	1205	1062	551	570	651	383	384	508	401	353	661	546
mRNA_D-dichotoma_M_contig1839.5454.1	8	8	19	0	0	1	9	9	11	8	4	5	217	200	434	756	704	334	389	528	320	311	390	238	248	553	442
mRNA_D-dichotoma_M_contig2476.8501.1	0	0	0	0	0	0	0	0	0	0	0	0	1	9	2	5	0	5	7	5	3	1	6	12	7	2	3
mRNA_D-dichotoma_M_contig2480.8522.1	13	9	8	0	0	0	2	3	0	2	1	1	25	25	93	59	53	35	76	63	73	30	56	29	42	28	37
mRNA_D-dichotoma_M_contig70.17904.1	27	8	18	0	0	0	5	23	5	1	0	0	434	144	544	205	257	256	335	248	50	50	567	330	301	138	133
mRNA_D-dichotoma_M_contig71.17991.1	0	0	0	0	0	0	0	0	0	0	0	0	0	0	0	0	0	0	0	0	0	0	0	0	0	0	0
mRNA_D-dichotoma_M_contig71.17993.1	0	0	0	229	28	147	0	0	0	1	0	0	0	2	3	4	2	0	2	2	0	0	0	25	2	36	62
mRNA_D-dichotoma_M_contig71.17994.1	0	0	2	0	0	0	1	2	0	0	2	0	126	340	304	564	280	207	212	214	26	63	240	398	275	263	145
mRNA_D-dichotoma_M_contig71.17995.1	0	0	1	0	0	0	0	0	0	0	0	0	15	41	82	169	100	37	39	40	11	13	22	71	27	84	31
mRNA_D-dichotoma_M_contig71.17997.1	4	0	1	1	2	0	4	0	1	1	0	0	4	26	39	65	69	18	21	22	4	11	36	43	36	26	12
mRNA_D-dichotoma_M_contig1140.1176.1	85	64	58	8	4	1	146	38	38	70	16	24	139	234	171	125	156	165	171	88	93	96	247	212	184	142	93
mRNA_D-dichotoma_M_contig1140.1181.1	0	0	0	0	0	0	0	0	0	0	0	0	2	16	1	3	9	1	4	2	0	0	6	5	3	4	1
mRNA_D-dichotoma_M_contig4524.14350.1	1	0	2	2	0	0	1	0	4	0	0	0	1	19	34	38	95	6	14	15	3	5	48	23	91	14	14
mRNA_D-dichotoma_M_contig4532.14368.1	1	1	5	3	2	0	6	4	2	6	3	3	72	176	94	207	259	72	145	106	8	20	356	191	144	277	65
mRNA_D-dichotoma_M_contig4542.14395.1	0	0	0	0	0	0	1	0	0	0	0	0	0	0	0	0	0	0	0	0	0	1	0	0	0	0	0
mRNA_D-dichotoma_M_contig4543.14396.1	9	40	1	0	0	0	8	4	2	16	1	0	69	148	86	144	85	46	119	87	11	16	186	85	64	149	35
mRNA_D-dichotoma_M_contig1199.1602.1	0	0	0	0	0	0	0	0	0	0	0	0	49	66	52	77	8	29	70	38	27	12	141	95	88	83	110
mRNA_D-dichotoma_M_contig1203.1648.1	6	0	3	4	2	5	5	1	3	4	9	8	249	409	358	1474	921	421	360	454	432	530	296	356	289	735	580
mRNA_D-dichotoma_M_contig1204.1654.1	0	0	0	0	0	0	0	0	0	0	0	0	4	0	0	0	1	0	1	0	0	0	0	6	3	0	0
mRNA_D-dichotoma_M_contig1204.1655.1	0	0	0	0	0	0	0	0	0	0	0	0	0	0	0	0	0	0	0	0	0	2	1	0	1	0	0
mRNA_D-dichotoma_M_contig1204.1656.1	10	1	3	1	0	0	4	3	0	5	2	2	45	281	166	132	132	178	229	156	31	109	62	131	98	35	31
mRNA_D-dichotoma_M_contig932.20062.1	2	1	0	0	0	0	2	0	1	0	0	0	0	0	0	20	12	0	0	0	19	0	0	0	0	9	28
mRNA_D-dichotoma_M_contig932.20069.1	9	0	5	0	0	0	2	2	1	1	0	0	434	283	824	356	319	479	586	580	126	203	520	361	637	427	169
mRNA_D-dichotoma_M_contig933.20073.1	0	0	0	0	0	0	0	0	0	0	0	0	3	0	0	0	0	0	0	0	0	0	1	0	0	0	0
mRNA_D-dichotoma_M_contig933.20074.1	0	0	0	0	0	0	0	0	0	0	0	0	0	0	0	0	0	0	0	0	0	0	0	0	0	0	0
mRNA_D-dichotoma_M_contig935.20086.1	139	47	110	0	0	0	96	95	163	101	68	55	1582	31	6952	693	5	524	5697	4644	26	91	7	6	5	4	0
mRNA_D-dichotoma_M_contig935.20088.1	44	7	22	0	0	0	27	14	21	16	2	6	37	1	245	123	0	41	347	200	17	61	0	0	0	0	0
mRNA_D-dichotoma_M_contig937.20100.1	0	1	0	0	0	0	4	3	0	0	1	0	40	55	114	111	106	54	104	89	14	18	116	72	68	120	60
mRNA_D-dichotoma_M_contig3611.12171.1	12	4	7	0	0	0	6	5	2	3	0	0	1113	666	249	253	267	3342	16	22	283	1158	533	307	334	779	640
mRNA_D-dichotoma_M_contig3615.12180.1	252	126	120	1	0	0	375	82	103	182	47	34	1720	2381	2210	2457	2189	1440	1955	1447	2279	1671	2759	2271	1964	2670	2362
mRNA_D-dichotoma_M_contig3621.12195.1	63	30	24	0	0	1	62	18	30	73	19	16	133	355	148	238	165	242	978	785	130	193	351	317	298	211	184
mRNA_D-dichotoma_M_contig3624.12199.1	29	27	18	0	0	0	93	16	8	41	5	13	0	0	0	0	0	0	0	0	7	5	0	1	0	0	1
mRNA_D-dichotoma_M_contig541.16021.1	43	22	23	13	0	12	17	19	18	8	7	9	135	54	237	495	408	131	208	161	51	125	309	97	113	280	221
mRNA_D-dichotoma_M_contig543.16055.1	0	0	0	0	0	0	0	0	0	0	0	0	0	0	0	0	0	0	0	0	0	0	0	0	0	0	0
mRNA_D-dichotoma_M_contig543.16056.1	0	0	0	0	0	0	0	0	0	0	0	0	0	0	0	0	0	0	0	0	0	0	0	0	1	0	0
mRNA_D-dichotoma_M_contig543.16059.1	80	43	40	1654	1056	983	206	61	116	255	128	137	654	653	1410	1303	828	414	775	682	413	421	996	768	584	805	372
mRNA_D-dichotoma_M_contig543.16065.1	9	14	8	3	0	1	19	13	6	17	7	10	88	67	222	196	205	89	213	141	39	66	226	124	99	103	83
mRNA_D-dichotoma_M_contig717.18064.1	0	0	0	1	2	0	4	0	0	1	0	0	75	244	104	79	21	93	131	77	16	15	202	167	111	42	20
mRNA_D-dichotoma_M_contig717.18069.1	0	0	0	0	0	0	0	0	0	0	0	0	67	74	124	91	55	52	168	225	10	8	9	26	21	31	17
mRNA_D-dichotoma_M_contig719.18085.1	29	10	24	1	1	0	35	46	62	125	124	80	2189	1083	2951	5091	4088	1400	2074	2620	1173	1040	3556	1675	1105	3012	2358
mRNA_D-dichotoma_M_contig719.18086.1	152	87	110	0	1	1	125	59	108	262	86	123	2433	2604	2286	4431	2883	1874	2643	2708	2187	2014	3943	2792	2622	3758	2957
mRNA_D-dichotoma_M_contig719.18088.1	352	198	185	0	0	1	172	100	113	127	26	56	759	524	1297	705	708	391	636	489	237	352	1221	583	620	710	550
mRNA_D-dichotoma_M_contig720.18107.1	429	140	256	0	0	0	279	101	120	98	17	28	37	1	354	70	0	160	1433	793	46	164	0	0	0	0	0
mRNA_D-dichotoma_M_contig2091.6798.1	20	4	12	0	0	2	12	12	3	13	3	13	21	8	13	15	2	5	21	29	24	15	33	18	9	25	10
mRNA_D-dichotoma_M_contig2092.6806.1	0	0	0	0	0	0	0	0	0	0	0	0	2	0	1	0	4	1	4	0	1	2	1	0	1	3	4
mRNA_D-dichotoma_M_contig2097.6816.1	32	7	13	2	0	0	36	15	13	15	4	5	490	865	942	1242	921	524	756	635	128	247	903	1024	716	867	367
mRNA_D-dichotoma_M_contig1467.3383.1	0	0	0	0	0	0	0	0	0	0	0	0	0	0	0	0	0	0	0	0	0	0	0	1	0	0	0
mRNA_D-dichotoma_M_contig1467.3385.1	0	0	0	0	0	0	1	0	0	0	0	0	2	0	3	2	1	0	2	2	4	0	0	3	2	2	2
mRNA_D-dichotoma_M_contig1471.3407.1	22	6	16	0	2	0	27	9	10	34	5	9	336	358	355	304	182	222	283	306	82	83	429	365	383	254	173
mRNA_D-dichotoma_M_contig518.15628.1	12	1	4	162	155	135	44	16	28	7	10	3	62	54	38	75	119	120	81	134	100	350	135	52	40	70	95
mRNA_D-dichotoma_M_contig519.15639.1	0	0	0	0	0	0	0	0	0	0	0	0	0	0	0	0	0	0	0	0	0	0	0	0	0	0	0
mRNA_D-dichotoma_M_contig521.15696.1	209	79	59	20	0	9	60	96	39	47	10	12	247	114	396	181	75	87	237	188	13	35	235	166	108	80	71
mRNA_D-dichotoma_M_contig564.16396.1	77	37	45	0	0	2	99	48	61	202	88	107	380	269	473	463	274	372	427	370	133	191	358	323	332	420	331
mRNA_D-dichotoma_M_contig567.16427.1	21	27	17	0	0	0	57	4	5	33	15	11	22	66	87	146	120	33	73	58	34	81	128	104	69	137	74
mRNA_D-dichotoma_M_contig567.16431.1	0	0	0	1	0	0	0	0	0	2	0	0	3	5	10	9	25	6	6	5	0	0	18	10	9	3	6
mRNA_D-dichotoma_M_contig2917.10093.1	23	8	17	0	0	0	30	8	14	21	1	2	0	0	0	0	0	0	14	11	0	0	0	0	0	0	0
mRNA_D-dichotoma_M_contig2919.10094.1	3	4	3	3	0	0	10	3	6	13	2	3	43	62	32	49	24	63	257	304	35	38	213	176	172	76	54
mRNA_D-dichotoma_M_contig2927.10128.1	81	40	35	2	2	1	74	38	53	196	84	91	1140	627	1281	1798	1047	619	826	914	538	464	1504	822	744	1126	845
mRNA_D-dichotoma_M_contig2929.10130.1	27	15	18	84	45	33	36	14	23	60	36	18	1159	1708	1729	1377	852	783	991	638	312	210	2276	1986	1421	888	627
mRNA_D-dichotoma_M_contig2609.9000.1	0	0	1	24	3	8	2	1	1	0	1	0	17	23	56	27	16	4	37	17	2	3	62	7	10	27	74
mRNA_D-dichotoma_M_contig2612.9014.1	66	32	36	2	0	0	70	24	33	21	6	7	2206	1714	3409	1560	1166	1237	2302	1455	1041	1019	2368	1616	1497	1176	1342
mRNA_D-dichotoma_M_contig2615.9016.1	11	12	3	0	0	0	6	8	12	15	6	5	316	133	96	186	254	103	182	133	78	121	632	99	156	192	416
mRNA_D-dichotoma_M_contig2615.9017.1	18	7	15	0	0	0	14	8	8	23	9	9	770	184	306	332	289	218	248	184	51	122	1106	159	176	210	467
mRNA_D-dichotoma_M_contig2615.9018.1	0	0	0	0	0	0	0	1	0	0	0	0	0	0	0	2	0	0	0	0	0	0	0	0	0	0	0
mRNA_D-dichotoma_M_contig2617.9020.1	142	25	87	5796	1318	3666	72	23	38	8	2	6	33	23	284	119	20	50	208	237	26	78	120	199	29	713	345
mRNA_D-dichotoma_M_contig2619.9028.1	67	45	31	282	23	143	90	41	57	131	62	47	507	659	1224	895	526	389	889	684	186	171	817	739	554	483	272
mRNA_D-dichotoma_M_contig2619.9029.1	1	0	0	138	18	77	0	0	0	2	0	0	0	4	12	6	0	3	15	6	0	2	7	3	5	8	4
mRNA_D-dichotoma_M_contig100.99.1	24	32	21	1919	411	909	43	43	45	94	34	37	640	512	802	1059	552	458	644	681	438	324	937	692	503	735	487
mRNA_D-dichotoma_M_contig101.158.1	2	0	2	38	3	20	3	0	1	0	0	0	0	0	0	0	0	0	0	0	0	0	2	14	0	44	76
mRNA_D-dichotoma_M_contig101.159.1	0	1	1	0	0	0	1	4	0	0	1	0	0	0	4	0	0	0	2	1	0	0	2	0	1	4	0
mRNA_D-dichotoma_M_contig101.167.1	0	0	2	83	19	54	0	0	0	1	1	0	0	0	0	0	0	0	4	2	0	0	0	18	1	16	52
mRNA_D-dichotoma_M_contig101.169.1	4	0	1	49	18	19	4	0	0	2	0	2	2	1	2	0	0	1	9	6	0	11	5	4	1	9	29
mRNA_D-dichotoma_M_contig101.170.1	0	0	0	155	29	86	0	0	1	1	0	0	12	25	33	28	22	1	31	17	4	6	21	59	32	28	66
mRNA_D-dichotoma_M_contig695.17825.1	102	106	65	3	0	8	135	73	53	77	25	33	282	671	443	446	360	278	489	290	187	252	530	343	324	287	224
mRNA_D-dichotoma_M_contig695.17828.1	491	398	233	11	4	8	632	278	198	445	121	134	1880	3850	2936	2782	2128	1862	3069	2250	1454	1434	3667	3328	2768	2083	1633
mRNA_D-dichotoma_M_contig696.17831.1	30	6	15	0	0	0	36	10	7	29	4	4	1299	1047	1002	687	779	879	830	712	297	439	816	961	1068	612	412
mRNA_D-dichotoma_M_contig696.17833.1	1	1	0	0	0	0	12	0	0	7	0	0	8	86	46	60	41	15	45	23	12	9	48	46	63	29	16
mRNA_D-dichotoma_M_contig697.17835.1	16	14	19	251	99	169	12	18	31	69	33	22	1226	792	1113	1482	1216	1146	1651	1871	1302	958	2326	1018	818	1815	1533
mRNA_D-dichotoma_M_contig697.17836.1	1	3	4	82	25	29	4	2	6	15	16	2	208	71	183	230	189	132	232	311	174	91	367	89	82	222	166
mRNA_D-dichotoma_M_contig697.17838.1	5	4	2	128	37	59	7	2	4	9	6	14	435	144	470	347	332	167	354	433	291	85	566	165	120	272	216
mRNA_D-dichotoma_M_contig697.17839.1	0	2	0	62	17	38	0	1	2	4	6	7	93	51	126	116	91	85	107	201	75	17	263	67	36	104	77
mRNA_D-dichotoma_M_contig698.17848.1	44	34	34	18	12	6	54	26	20	98	40	34	2953	517	909	1327	1272	655	719	573	478	755	3449	795	1089	1913	2632
mRNA_D-dichotoma_M_contig699.17851.1	72	33	71	638	174	461	109	50	54	136	54	86	1668	2182	3875	5646	3753	1956	3415	3325	1493	1419	2526	3006	1839	3316	2279
mRNA_D-dichotoma_M_contig682.17703.1	22	32	39	77	22	45	22	48	20	8	5	6	346	191	500	796	877	399	306	306	765	675	367	214	424	984	717
mRNA_D-dichotoma_M_contig684.17722.1	784	467	546	30	13	12	572	342	484	372	170	241	7392	2887	9973	5507	4203	4090	6144	5694	4023	3097	6248	3241	3682	3844	4200
mRNA_D-dichotoma_M_contig685.17728.1	8	2	5	18	18	18	35	9	4	4	1	0	6	10	23	10	0	6	56	22	31	13	87	11	16	24	48
mRNA_D-dichotoma_M_contig685.17732.1	32	17	7	0	0	0	20	7	3	10	3	3	52	126	183	135	58	124	111	103	9	22	121	238	234	79	20
mRNA_D-dichotoma_M_contig686.17737.1	232	175	187	3	1	2	146	161	161	183	125	139	1723	1150	2090	4422	2386	838	985	1102	1020	1160	1685	1382	981	1810	1810
mRNA_D-dichotoma_M_contig686.17738.1	46	20	15	1	0	0	43	13	8	20	12	9	399	410	846	303	184	224	262	257	78	90	658	500	542	261	127
mRNA_D-dichotoma_M_contig686.17741.1	0	0	0	0	0	0	0	0	0	0	0	0	0	0	0	0	0	0	0	0	0	0	0	0	0	0	0
mRNA_D-dichotoma_M_contig3165.10933.1	0	0	0	0	0	0	0	0	0	0	0	0	0	0	0	0	0	0	0	0	0	0	0	0	0	0	0
mRNA_D-dichotoma_M_contig3172.10949.1	7	12	0	0	0	0	8	1	1	14	4	5	495	1126	547	979	537	503	773	655	241	321	686	884	722	575	243
mRNA_D-dichotoma_M_contig3172.10950.1	0	0	0	0	0	0	0	0	0	3	1	0	162	33	353	146	161	160	457	664	20	12	332	242	253	65	22
mRNA_D-dichotoma_M_contig3172.10951.1	0	0	0	0	0	0	0	0	0	0	0	0	2	5	5	2	0	3	8	11	2	2	3	5	8	2	0
mRNA_D-dichotoma_M_contig3172.10952.1	0	0	0	0	0	0	6	0	0	2	2	3	65	85	175	118	164	85	230	325	32	35	211	147	209	82	65
mRNA_D-dichotoma_M_contig3064.10609.1	17	7	6	0	0	0	9	2	2	3	1	2	106	7	802	440	0	51	635	380	6	51	0	0	0	0	2
mRNA_D-dichotoma_M_contig3071.10625.1	4	0	1	2	2	1	10	0	1	1	1	0	0	0	0	0	0	2	3	1	0	1	0	2	1	0	0
mRNA_D-dichotoma_M_contig3072.10627.1	1	3	2	0	0	0	5	0	4	2	0	0	186	39	9	99	122	216	2	2	0	137	1062	162	469	185	132
mRNA_D-dichotoma_M_contig108.688.1	111	41	26	27	0	7	346	18	21	135	3	20	1610	523	336	185	156	231	650	302	197	243	1038	1322	838	400	260
mRNA_D-dichotoma_M_contig108.694.1	18	4	6	612	53	361	22	13	18	6	0	3	30	47	117	67	27	21	170	115	6	19	71	74	44	71	191
mRNA_D-dichotoma_M_contig109.773.1	10	6	2	0	0	0	6	3	0	4	2	3	37	98	105	121	80	72	68	78	26	39	114	76	110	83	46
mRNA_D-dichotoma_M_contig109.781.1	0	0	0	0	0	0	0	0	0	0	0	0	3	0	0	0	0	0	0	0	0	0	0	0	0	0	0
mRNA_D-dichotoma_M_contig2872.9915.1	0	0	0	0	0	0	0	0	0	0	0	0	0	10	2	0	1	1	2	3	0	1	4	2	8	1	0
mRNA_D-dichotoma_M_contig2872.9916.1	0	0	0	0	0	0	0	0	0	0	0	0	0	0	0	0	1	0	3	3	0	0	0	0	0	0	0
mRNA_D-dichotoma_M_contig2875.9919.1	7	3	4	11	2	10	25	8	19	74	16	16	646	470	672	498	317	263	646	692	228	114	930	515	377	352	298
mRNA_D-dichotoma_M_contig2875.9920.1	0	0	0	17	0	2	1	0	0	4	4	1	9	34	7	42	7	33	80	51	9	10	83	79	42	24	9
mRNA_D-dichotoma_M_contig2876.9925.1	90	47	35	0	0	0	170	27	24	73	30	55	8	1	19	3	26	44	408	187	2	10	93	9	10	7	5
mRNA_D-dichotoma_M_contig2881.9945.1	15	28	21	5	7	6	59	21	37	35	16	16	50	18	39	56	47	20	63	55	35	19	114	34	16	78	53
mRNA_D-dichotoma_M_contig2881.9948.1	6	1	5	22	6	15	4	5	5	16	4	5	550	259	787	863	404	369	431	533	266	228	624	363	384	418	517
mRNA_D-dichotoma_M_contig2881.9950.1	10	0	4	0	0	0	1	0	9	10	4	3	14	20	47	26	51	3	18	13	6	5	56	14	9	13	23
mRNA_D-dichotoma_M_contig2881.9951.1	8	6	7	0	0	0	7	0	11	7	4	5	17	44	57	63	122	18	25	32	8	17	99	42	32	25	31
mRNA_D-dichotoma_M_contig4386.14046.1	3	0	0	20	0	5	2	0	0	6	2	2	68	75	85	72	49	2	11	23	1	0	295	120	182	165	186
mRNA_D-dichotoma_M_contig4386.14047.1	5	0	0	0	0	0	4	1	4	14	0	1	228	198	223	209	25	67	29	19	80	51	280	183	105	63	45
mRNA_D-dichotoma_M_contig4398.14060.1	7	4	0	63	8	13	41	1	4	20	1	3	138	204	114	179	54	74	126	97	104	60	180	190	114	112	144
mRNA_D-dichotoma_M_contig4398.14061.1	2	0	2	59	19	13	25	1	1	33	0	2	48	159	54	168	125	83	136	104	94	49	174	218	88	110	117
mRNA_D-dichotoma_M_contig4400.14090.1	0	0	0	0	0	0	1	0	0	2	0	0	618	8	39	5	95	310	16	18	258	119	11	16	22	4	70
mRNA_D-dichotoma_M_contig599.16844.1	67	28	44	178	74	139	30	28	30	108	52	62	478	628	663	1414	1117	677	520	704	1189	901	488	637	457	1076	1288
mRNA_D-dichotoma_M_contig599.16846.1	101	48	78	5354	1110	2797	119	86	102	322	196	217	2190	1005	1684	2467	2147	1874	1819	2073	1376	1610	1798	1230	1096	2006	3078
mRNA_D-dichotoma_M_contig601.16889.1	0	0	0	0	0	0	0	0	0	0	0	0	0	0	0	0	0	0	0	0	0	0	0	0	0	0	0
mRNA_D-dichotoma_M_contig601.16901.1	0	2	0	0	0	0	1	0	0	1	0	0	1	0	10	5	0	1	3	1	0	0	0	0	6	2	5
mRNA_D-dichotoma_M_contig848.19274.1	6	1	1	3	5	9	18	1	1	22	6	7	1138	2297	866	1712	423	1111	727	484	374	652	913	1507	1447	1433	705
mRNA_D-dichotoma_M_contig851.19306.1	12	9	8	0	0	0	14	11	9	12	4	11	264	215	346	677	375	272	272	378	220	271	417	291	246	385	398
mRNA_D-dichotoma_M_contig851.19307.1	10	3	10	0	0	0	18	4	10	15	4	9	309	296	346	776	421	315	401	363	442	313	532	461	302	458	538
mRNA_D-dichotoma_M_contig317.10938.1	9	3	10	5	1	0	24	4	2	9	6	4	435	1191	1131	1383	1233	917	1502	944	134	247	1125	915	1214	998	115
mRNA_D-dichotoma_M_contig318.10970.1	109	31	44	879	67	524	61	26	78	78	53	32	978	1165	1909	2387	1230	709	1658	1685	526	464	2383	1823	1311	1686	1319
mRNA_D-dichotoma_M_contig318.10971.1	10	0	6	39	8	6	19	9	7	4	2	1	535	137	464	142	81	174	374	292	38	38	324	173	124	75	86
mRNA_D-dichotoma_M_contig318.10972.1	61	7	26	7	5	7	39	8	16	29	2	9	428	243	418	442	341	251	451	436	173	206	367	299	287	328	320
mRNA_D-dichotoma_M_contig320.11060.1	3	13	6	78	18	54	1	6	15	19	7	19	553	319	633	1207	914	377	593	687	353	225	706	406	353	678	477
mRNA_D-dichotoma_M_contig320.11065.1	442	324	449	18	8	15	505	296	333	223	108	125	265	652	665	795	848	792	865	630	713	779	709	471	647	884	615
mRNA_D-dichotoma_M_contig81.18938.1	2	0	0	0	0	0	3	0	0	2	0	1	397	474	629	184	109	165	210	215	104	85	398	308	285	320	101
mRNA_D-dichotoma_M_contig81.18939.1	1	0	6	0	0	0	0	1	0	0	1	17	40	60	62	63	69	17	46	43	19	28	109	62	59	74	19
mRNA_D-dichotoma_M_contig81.18941.1	0	0	0	0	0	0	0	0	0	0	0	0	0	0	0	0	0	0	0	0	2	0	0	0	0	1	0
mRNA_D-dichotoma_M_contig81.18946.1	6	0	1	36	12	22	6	4	1	86	54	66	1857	1997	4203	6207	4909	1046	4043	4555	1366	654	3061	2396	1325	2265	1313
mRNA_D-dichotoma_M_contig82.19016.1	1	0	1	3022	524	873	2	2	3	8	0	2	0	4	23	7	1	3	8	4	0	0	17	8	17	17	8
mRNA_D-dichotoma_M_contig82.19024.1	3	0	1	55	24	24	3	1	0	2	0	0	20	55	10	68	17	17	35	57	16	21	39	18	15	38	24
mRNA_D-dichotoma_M_contig2226.7434.1	26	17	26	0	0	0	44	27	31	75	47	43	72	27	48	34	6	16	23	27	1	1	316	35	31	42	17
mRNA_D-dichotoma_M_contig2227.7439.1	25	7	14	3697	342	2332	9	15	9	1	1	0	131	41	109	68	161	115	271	326	84	98	238	435	169	1067	609
mRNA_D-dichotoma_M_contig2229.7449.1	0	0	0	8	2	2	4	0	0	0	0	0	16	37	18	32	13	16	16	11	4	4	40	20	39	16	13
mRNA_D-dichotoma_M_contig2231.7461.1	98	50	81	0	0	0	67	37	30	19	6	5	323	21	1778	175	0	120	1232	673	118	125	101	19	23	18	48
mRNA_D-dichotoma_M_contig252.8676.1	17	1	1	0	0	0	8	3	0	17	1	0	145	480	262	178	235	87	285	147	51	61	767	426	341	169	91
mRNA_D-dichotoma_M_contig252.8678.1	96	63	32	0	0	0	69	15	39	61	23	16	277	325	316	364	212	194	241	244	183	149	466	302	278	269	166
mRNA_D-dichotoma_M_contig252.8679.1	21	5	13	0	0	2	13	1	7	11	1	6	56	67	55	100	47	59	56	60	37	28	133	111	68	55	50
mRNA_D-dichotoma_M_contig253.8711.1	1	0	0	0	0	0	7	1	2	10	1	1	0	7	0	4	0	0	5	4	0	0	0	19	1	4	4
mRNA_D-dichotoma_M_contig254.8732.1	2	0	0	0	0	0	1	0	0	1	0	0	0	2	0	0	0	2	0	2	0	2	5	2	0	2	4
mRNA_D-dichotoma_M_contig254.8737.1	304	154	136	540	34	237	165	86	74	145	41	44	1678	1337	1940	1279	983	1097	1585	1365	1157	950	1896	1400	1782	1170	1004
mRNA_D-dichotoma_M_contig1118.995.1	0	1	1	0	0	0	7	4	1	3	0	0	92	143	160	112	30	78	200	131	8	31	153	154	124	105	48
mRNA_D-dichotoma_M_contig1118.999.1	63	44	42	3	2	0	83	28	31	98	20	31	272	113	115	192	240	53	55	25	24	36	1077	324	288	465	345
mRNA_D-dichotoma_M_contig1119.1004.1	0	0	0	0	0	0	0	0	0	0	0	0	0	0	0	1	0	0	0	1	0	0	0	0	0	1	2
mRNA_D-dichotoma_M_contig1119.1013.1	21	3	0	1208	132	581	16	2	3	11	5	9	965	1762	2225	2814	968	1186	1622	784	217	420	872	1835	1055	1176	437
mRNA_D-dichotoma_M_contig1120.1037.1	58	42	44	39	8	23	64	31	33	86	60	62	740	1226	1242	2096	1124	998	1239	1179	571	468	1468	1008	782	1014	755
mRNA_D-dichotoma_M_contig1121.1043.1	0	0	0	0	0	0	0	0	0	0	0	0	0	1	0	0	0	0	0	0	0	0	0	2	2	1	1
mRNA_D-dichotoma_M_contig1121.1044.1	0	0	0	0	0	0	0	0	0	0	0	0	0	0	0	0	0	0	0	0	0	0	0	0	0	0	0
mRNA_D-dichotoma_M_contig3445.11705.1	0	0	0	0	0	0	0	0	0	0	0	0	1	2	2	0	0	1	0	0	0	0	0	2	1	0	0
mRNA_D-dichotoma_M_contig3446.11707.1	0	0	0	0	0	0	2	0	0	0	0	0	11	14	8	19	3	14	20	13	1	4	12	27	10	10	3
mRNA_D-dichotoma_M_contig3449.11712.1	85	43	38	1	0	1	49	42	60	191	57	90	2466	1624	3019	3438	2044	1982	1742	1811	1412	1505	2249	2014	1933	1917	2084
mRNA_D-dichotoma_M_contig3450.11738.1	4	1	4	3	3	0	7	0	4	4	3	2	0	7	9	3	0	0	49	24	9	2	41	16	8	11	32
mRNA_D-dichotoma_M_contig3450.11739.1	0	1	1	0	0	0	11	0	0	7	5	1	0	5	8	9	0	1	36	23	3	2	24	19	0	11	29
mRNA_D-dichotoma_M_contig3455.11743.1	854	362	421	0	0	0	340	613	338	236	46	132	692	2314	9023	2216	1861	240	1683	1050	76	66	228	729	530	291	164
mRNA_D-dichotoma_M_contig1322.2487.1	0	0	1	0	0	0	2	4	1	2	0	0	0	4	2	0	4	2	1	3	0	0	11	18	5	0	3
mRNA_D-dichotoma_M_contig1323.2492.1	0	0	0	10	0	0	1	0	0	1	0	0	19	48	44	79	90	34	59	81	3	20	57	48	38	74	53
mRNA_D-dichotoma_M_contig1323.2495.1	0	0	0	0	0	0	0	0	0	0	0	0	0	0	0	0	0	0	2	1	0	0	0	0	0	0	0
mRNA_D-dichotoma_M_contig1324.2497.1	39	33	26	28	6	24	62	34	40	75	43	50	3634	2329	3062	2792	2008	1531	2050	1987	921	975	3003	2783	1854	2227	1483
mRNA_D-dichotoma_M_contig1325.2503.1	3	2	3	0	0	0	8	1	0	1	1	0	8	0	4	6	0	1	28	33	0	0	23	22	32	9	15
mRNA_D-dichotoma_M_contig1.8.1	39	23	15	495	154	378	35	37	30	69	43	42	1520	580	2033	2023	1711	730	1189	1197	402	430	1523	955	1038	1428	608
mRNA_D-dichotoma_M_contig1.19.1	680	245	447	1343	143	814	197	272	129	148	65	74	7736	3790	10038	4357	4079	5697	9999	8304	2364	2826	8569	7314	7934	4208	2623
mRNA_D-dichotoma_M_contig1.21.1	0	0	0	0	0	0	0	0	0	0	0	0	185	202	227	147	117	79	154	244	36	58	145	219	220	130	110
mRNA_D-dichotoma_M_contig1.27.1	67	52	49	944	213	563	34	59	34	143	87	107	1703	1634	3287	3939	1747	1234	3380	4063	653	345	3845	2217	833	1974	804
mRNA_D-dichotoma_M_contig888.19650.1	1	1	0	7	6	1	0	1	0	0	0	0	0	0	0	0	0	0	0	0	0	0	0	1	0	0	0
mRNA_D-dichotoma_M_contig890.19670.1	28	35	29	30	2	14	100	53	98	481	243	234	2415	2048	2601	4102	2432	1953	2493	2694	1666	1853	3843	2037	1781	3276	3346
mRNA_D-dichotoma_M_contig890.19671.1	10	6	3	2	0	0	3	3	7	6	4	4	392	517	603	496	416	298	669	630	131	266	434	482	355	378	204
mRNA_D-dichotoma_M_contig891.19677.1	0	0	1	104	15	44	0	0	1	1	0	0	0	3	4	0	0	0	4	4	2	0	1	13	0	9	59
mRNA_D-dichotoma_M_contig545.16082.1	0	0	0	0	0	0	0	0	0	0	0	0	0	1	0	0	0	0	0	0	0	0	0	0	0	0	0
mRNA_D-dichotoma_M_contig546.16088.1	6	2	3	51	29	16	3	4	4	5	1	1	6	8	24	14	0	11	35	16	7	5	13	39	15	39	137
mRNA_D-dichotoma_M_contig546.16089.1	4	2	1	33	11	14	4	2	0	4	1	1	15	20	28	9	9	8	69	14	3	6	19	16	8	7	67
mRNA_D-dichotoma_M_contig546.16090.1	1	0	0	33	11	12	0	0	0	0	0	0	0	0	0	0	3	0	0	0	0	0	0	0	0	0	0
mRNA_D-dichotoma_M_contig547.16106.1	2	0	3	71	3	14	27	1	6	3	1	0	46	56	40	46	26	22	35	37	8	12	79	37	20	37	16
mRNA_D-dichotoma_M_contig547.16107.1	0	2	2	260	25	36	23	7	7	7	1	2	38	55	40	49	58	26	48	50	3	11	75	34	35	46	32
mRNA_D-dichotoma_M_contig2315.7841.1	6	10	9	0	0	0	3	6	8	0	1	1	67	408	443	1247	787	134	501	374	143	86	285	307	189	325	59
mRNA_D-dichotoma_M_contig2316.7844.1	44	3	13	0	0	0	82	6	4	21	2	7	0	0	0	0	0	1	0	0	0	1	1	0	0	0	0
mRNA_D-dichotoma_M_contig2317.7851.1	0	0	0	0	0	0	0	1	0	1	0	0	3	48	24	3	2	23	76	80	10	12	24	35	29	4	5
mRNA_D-dichotoma_M_contig2318.7855.1	72	40	50	5458	533	2313	124	53	58	145	68	85	2994	2507	5012	4918	2887	2257	3495	3882	1600	1516	3979	2970	2345	2999	3428
mRNA_D-dichotoma_M_contig3997.13098.1	0	0	0	0	0	0	0	0	0	0	0	0	0	0	0	0	0	0	0	0	0	0	0	0	0	0	0
mRNA_D-dichotoma_M_contig4000.13175.1	14	2	2	0	0	0	18	0	1	6	1	0	7	4	8	0	2	11	12	6	18	20	1	24	6	4	5
mRNA_D-dichotoma_M_contig4005.13182.1	3	0	1	976	164	544	2	5	4	5	5	0	170	73	237	307	223	102	232	282	28	48	127	132	50	216	108
mRNA_D-dichotoma_M_contig4016.13202.1	28	34	17	0	0	0	50	9	23	53	20	13	1142	1132	1139	1286	834	597	1284	1128	395	344	1501	1401	1170	1057	534
mRNA_D-dichotoma_M_contig4020.13224.1	8	2	1	0	0	0	5	2	4	22	3	0	0	6	2	1	0	5	10	14	1	4	10	44	28	8	11
mRNA_D-dichotoma_M_contig1689.4698.1	3	4	11	0	0	0	3	7	7	14	3	7	116	74	239	232	241	145	184	227	91	34	147	73	55	103	175
mRNA_D-dichotoma_M_contig1689.4700.1	287	114	206	1	0	7	205	99	157	219	123	121	3385	2231	4932	6336	3711	2735	4208	4342	2452	1870	3495	2838	1934	3426	5169
mRNA_D-dichotoma_M_contig1691.4717.1	0	0	3	0	0	0	0	7	3	0	1	0	281	275	130	315	179	165	111	80	100	148	647	238	341	342	304
mRNA_D-dichotoma_M_contig1691.4718.1	1191	706	699	0	0	0	934	418	432	359	126	111	6	5	215	107	11	29	205	189	26	114	3	0	0	0	0
mRNA_D-dichotoma_M_contig1694.4725.1	0	0	0	0	1	0	0	0	0	0	0	0	0	0	6	0	0	0	0	0	0	0	1	2	1	1	0
mRNA_D-dichotoma_M_contig1694.4728.1	1	0	0	0	0	0	2	0	0	0	0	0	51	11	35	45	39	12	11	7	2	10	6	33	21	16	2
mRNA_D-dichotoma_M_contig1695.4738.1	20	12	13	0	0	2	6	17	18	13	9	9	4	0	94	23	0	3	96	58	5	7	40	0	1	1	3
mRNA_D-dichotoma_M_contig898.19725.1	12	5	7	1	0	0	17	4	4	8	1	2	287	375	691	662	440	161	521	304	86	75	460	313	196	338	149
mRNA_D-dichotoma_M_contig899.19738.1	0	0	0	0	0	0	0	0	0	0	0	0	0	0	0	0	0	1	0	0	0	1	0	0	0	0	0
mRNA_D-dichotoma_M_contig901.19782.1	0	0	0	0	0	0	0	0	0	2	0	0	0	0	0	0	12	0	0	0	0	0	0	2	0	0	2
mRNA_D-dichotoma_M_contig2603.8990.1	166	109	131	2	0	8	110	96	95	198	108	136	15552	5530	8132	9778	7988	5783	7292	7541	5908	5424	10820	7452	7859	8724	7688
mRNA_D-dichotoma_M_contig2603.8991.1	2	0	3	0	0	0	1	2	2	9	7	6	63	91	93	152	133	86	80	108	39	41	132	76	59	99	56
mRNA_D-dichotoma_M_contig30.10414.1	0	0	0	0	0	0	8	0	1	0	1	1	228	151	165	221	96	69	166	171	20	27	278	235	112	123	73
mRNA_D-dichotoma_M_contig31.10718.1	18	13	9	0	0	0	18	18	22	40	11	20	844	1023	1057	1980	1600	933	1294	1344	590	780	1905	1323	1132	1686	1551
mRNA_D-dichotoma_M_contig31.10719.1	4	0	1	0	0	0	9	3	8	9	6	12	353	195	501	752	483	221	338	377	119	131	500	321	198	395	332
mRNA_D-dichotoma_M_contig31.10721.1	7	0	1	0	0	0	5	5	4	2	0	4	204	64	290	240	236	114	179	149	41	38	283	166	120	117	100
mRNA_D-dichotoma_M_contig736.18213.1	91	37	75	3	0	2	70	41	78	143	89	116	2802	1705	4649	5135	3048	1905	2993	3146	1190	1250	4023	2654	2028	3064	1869
mRNA_D-dichotoma_M_contig737.18219.1	2	0	0	0	0	1	0	0	0	1	0	0	0	0	0	0	0	0	0	0	0	0	2	0	1	0	2
mRNA_D-dichotoma_M_contig738.18227.1	80	54	65	565	94	347	111	44	57	146	46	60	1324	1909	1593	4807	2731	1640	1682	1986	1663	1440	2428	2367	1758	2997	2247
mRNA_D-dichotoma_M_contig738.18228.1	26	4	13	229	24	102	10	8	2	23	6	6	437	314	504	732	618	357	358	483	138	146	498	444	348	430	263
mRNA_D-dichotoma_M_contig739.18231.1	2	2	4	53	2	36	10	0	2	0	1	2	18	17	31	71	21	20	14	7	2	6	56	93	61	25	29
mRNA_D-dichotoma_M_contig739.18237.1	0	0	0	0	0	0	0	0	0	0	0	0	0	0	0	39	10	0	0	0	12	2	0	0	0	14	17
mRNA_D-dichotoma_M_contig1616.4301.1	10	4	5	3	3	2	6	4	3	19	6	2	1232	826	1241	887	888	738	957	957	643	549	1056	1045	1288	996	585
mRNA_D-dichotoma_M_contig1617.4310.1	12	6	10	75	15	50	11	12	9	31	9	16	991	635	1813	1859	1018	865	1069	1273	407	373	1434	878	625	737	763
mRNA_D-dichotoma_M_contig1618.4322.1	0	0	0	3	0	0	0	0	0	0	0	0	0	0	0	0	0	0	0	0	0	1	1	0	0	0	0
mRNA_D-dichotoma_M_contig1619.4328.1	213	98	152	35	11	15	93	131	94	81	36	50	4566	2585	3910	2247	1733	2419	2818	2369	1615	1684	3726	3125	3074	2346	2271
mRNA_D-dichotoma_M_contig1621.4357.1	0	0	0	0	0	0	0	0	0	0	0	0	1	0	0	0	0	0	3	0	0	0	4	2	0	1	0
mRNA_D-dichotoma_M_contig1621.4358.1	0	0	0	0	0	0	1	0	0	0	0	0	1	0	0	0	0	0	0	0	0	0	0	0	0	1	0
mRNA_D-dichotoma_M_contig1980.6160.1	27	10	7	0	0	2	9	10	12	20	15	14	123	83	382	176	243	104	250	160	34	18	368	145	119	131	83
mRNA_D-dichotoma_M_contig1982.6173.1	0	0	0	12	0	0	0	0	0	0	0	0	0	0	0	6	0	1	0	0	0	0	0	0	0	0	0
mRNA_D-dichotoma_M_contig1987.6185.1	0	0	0	0	0	0	0	0	0	0	0	0	0	0	0	0	0	0	0	0	0	0	76	0	0	0	0
mRNA_D-dichotoma_M_contig1987.6186.1	9	0	0	0	0	0	5	1	0	5	1	1	20	36	26	10	49	34	115	83	34	35	46	18	31	35	15
mRNA_D-dichotoma_M_contig1988.6189.1	1	0	0	1	0	0	0	0	0	0	0	0	0	0	1	0	0	2	1	0	0	0	0	2	0	1	0
mRNA_D-dichotoma_M_contig3501.11885.1	468	167	238	263	201	61	474	241	149	282	94	133	130	66	411	108	67	131	67	104	41	87	383	72	90	44	81
mRNA_D-dichotoma_M_contig3501.11886.1	26	25	36	16	26	8	27	30	19	35	8	19	29	6	41	16	19	14	3	21	2	2	127	7	18	31	20
mRNA_D-dichotoma_M_contig3501.11887.1	0	0	0	0	0	0	0	0	0	0	0	0	1	0	1	0	7	1	8	10	0	0	12	6	2	6	0
mRNA_D-dichotoma_M_contig3502.11889.1	43	34	55	57	24	27	29	50	30	15	10	21	836	356	1109	2144	1477	591	672	769	1031	798	396	402	431	1400	1019
mRNA_D-dichotoma_M_contig3506.11895.1	7	4	6	10	0	7	7	5	4	3	4	1	119	42	334	370	248	76	181	162	133	92	146	84	89	145	176
mRNA_D-dichotoma_M_contig1962.6073.1	0	0	0	0	0	0	0	0	0	0	0	0	0	0	0	0	0	0	0	0	0	0	0	0	0	0	0
mRNA_D-dichotoma_M_contig1963.6074.1	102	38	64	10424	2346	6116	202	64	73	56	16	16	133	46	60	38	36	35	94	135	83	38	272	321	67	862	282
mRNA_D-dichotoma_M_contig1965.6080.1	0	8	9	0	0	1	2	3	1	3	0	0	69	20	71	238	224	39	90	87	59	70	102	81	74	126	117
mRNA_D-dichotoma_M_contig1966.6081.1	0	0	0	0	0	0	0	0	0	0	0	0	0	0	0	0	0	1	0	0	0	0	0	0	1	0	0
mRNA_D-dichotoma_M_contig1968.6091.1	9	5	2	0	0	0	4	6	5	7	3	13	712	276	846	292	275	365	690	625	154	147	495	359	475	236	149
mRNA_D-dichotoma_M_contig1968.6093.1	1	0	0	0	0	0	4	0	0	1	0	0	11	19	22	24	5	5	44	45	15	6	38	33	15	21	12
mRNA_D-dichotoma_M_contig2.6242.1	0	1	0	1	0	0	6	0	2	7	0	1	37	52	81	37	36	37	33	25	22	13	71	140	50	57	135
mRNA_D-dichotoma_M_contig2.6246.1	1188	753	585	1333	113	783	1552	440	344	1847	548	737	3356	12649	3570	9899	7266	8702	5970	4857	13891	13801	6628	10446	16964	12723	8103
mRNA_D-dichotoma_M_contig2.6264.1	78	27	27	778	151	371	72	32	34	95	32	35	388	376	563	585	434	360	551	469	147	200	528	510	537	600	388
mRNA_D-dichotoma_M_contig2.6265.1	1	0	0	347	47	151	2	4	3	8	1	5	19	26	95	207	110	25	51	77	9	8	109	29	21	78	51
mRNA_D-dichotoma_M_contig2.6266.1	2	3	4	816	144	359	6	8	8	34	13	14	128	78	231	273	236	93	181	215	48	15	276	106	50	122	43
mRNA_D-dichotoma_M_contig2.6271.1	17	24	12	68	7	30	83	15	20	88	27	32	64	55	36	42	39	24	32	26	20	11	198	57	57	61	103
mRNA_D-dichotoma_M_contig2.6272.1	1	0	0	7	0	2	0	0	0	0	0	0	0	78	18	11	19	11	38	24	3	2	21	34	24	17	0
mRNA_D-dichotoma_M_contig2582.8895.1	0	0	0	0	0	0	0	0	0	1	0	1	0	0	4	4	6	1	2	7	0	0	1	6	4	4	7
mRNA_D-dichotoma_M_contig2586.8901.1	0	0	0	0	0	0	0	0	0	0	0	0	2	0	0	0	0	0	1	2	0	1	0	0	0	0	0
mRNA_D-dichotoma_M_contig2593.8931.1	1	1	6	6	0	3	30	7	14	30	15	14	69	76	101	129	72	72	149	122	64	55	231	138	91	119	131
mRNA_D-dichotoma_M_contig2593.8932.1	5	2	9	10	0	5	14	4	7	32	10	7	46	77	92	139	65	52	208	128	64	60	268	184	114	105	150
mRNA_D-dichotoma_M_contig2593.8933.1	0	0	0	0	4	1	0	2	1	6	6	7	20	18	40	45	21	24	71	52	9	14	90	36	35	25	34
mRNA_D-dichotoma_M_contig3893.12858.1	20	9	1	3	0	0	12	6	4	6	1	8	579	442	956	1369	2067	775	745	557	562	977	902	696	1041	1830	1078
mRNA_D-dichotoma_M_contig3899.12865.1	1	0	0	4	0	0	0	0	0	0	0	0	0	0	0	0	0	0	0	0	0	0	1	0	0	0	0
mRNA_D-dichotoma_M_contig3900.12906.1	0	0	0	0	0	0	0	0	0	0	0	1	0	1	0	0	0	0	0	0	0	0	0	0	0	0	0
mRNA_D-dichotoma_M_contig3901.12910.1	0	0	0	3	0	5	2	0	0	1	1	1	2	2	5	6	7	2	3	3	0	0	11	0	9	5	1
mRNA_D-dichotoma_M_contig3901.12913.1	0	0	0	0	0	0	5	0	0	10	0	0	3	29	16	23	25	2	0	1	0	1	10	7	9	10	3
mRNA_D-dichotoma_M_contig3903.12918.1	0	0	0	0	0	0	0	0	0	3	0	1	14	24	66	53	43	19	38	45	16	6	48	2	6	48	22
mRNA_D-dichotoma_M_contig3903.12919.1	1	0	0	0	0	0	0	0	0	3	1	0	45	40	90	114	88	29	58	65	21	18	76	24	12	47	48
mRNA_D-dichotoma_M_contig3911.12934.1	1105	694	574	78	12	63	554	269	121	135	38	56	52478	113515	62928	100626	49738	41395	78728	62979	5978	17588	99243	160164	133149	81439	19948
mRNA_D-dichotoma_M_contig3912.12937.1	4	1	0	0	0	2	10	3	2	88	22	33	18	21	33	26	25	31	24	4	14	26	22	193	228	65	11
mRNA_D-dichotoma_M_contig327.11233.1	31	16	38	1	0	0	24	28	17	19	8	8	91	68	83	494	683	90	123	123	132	163	192	91	118	457	357
mRNA_D-dichotoma_M_contig327.11235.1	35	36	27	104	140	84	65	25	52	78	42	56	244	127	340	279	222	109	215	157	83	85	472	286	179	307	208
mRNA_D-dichotoma_M_contig327.11237.1	2	1	0	57	25	12	1	1	0	4	2	1	0	3	2	3	7	0	3	3	0	0	13	6	1	3	3
mRNA_D-dichotoma_M_contig327.11241.1	86	29	33	55	8	29	81	43	52	35	7	8	20	0	104	36	0	7	170	123	3	23	5	105	5	107	701
mRNA_D-dichotoma_M_contig327.11242.1	18	11	13	136	3	97	51	13	26	29	14	16	1486	804	733	1216	1082	878	538	588	2041	2166	1321	830	982	1157	2425
mRNA_D-dichotoma_M_contig328.11279.1	0	1	0	2	1	1	1	1	0	9	2	5	54	45	140	59	9	17	135	144	13	1	165	66	8	21	17
mRNA_D-dichotoma_M_contig32.11034.1	0	0	0	13	1	10	0	3	2	0	1	0	0	16	26	4	15	3	16	6	13	1	10	35	29	10	15
mRNA_D-dichotoma_M_contig32.11039.1	105	109	129	89	32	44	84	126	194	181	155	262	5638	1535	6903	6487	6471	3742	4880	5879	4944	2708	6314	2350	2484	4990	5048
mRNA_D-dichotoma_M_contig32.11040.1	5	1	6	5	3	2	10	8	8	18	8	16	683	133	606	991	705	270	375	339	655	421	644	218	220	737	896
mRNA_D-dichotoma_M_contig1496.3545.1	0	0	1	1	0	0	3	0	3	0	1	0	23	34	23	51	14	15	50	31	0	9	94	28	39	35	5
mRNA_D-dichotoma_M_contig1497.3552.1	2	1	1	16	0	11	18	0	1	2	1	3	0	10	1	2	17	0	12	6	10	0	7	7	3	10	19
mRNA_D-dichotoma_M_contig1498.3556.1	8	5	22	8	0	8	29	20	33	87	52	57	199	37	156	151	114	56	64	70	15	27	296	90	93	146	64
mRNA_D-dichotoma_M_contig1498.3557.1	96	85	113	49	19	35	193	97	174	389	198	212	1171	429	857	638	556	297	299	311	195	239	1468	534	646	920	457
mRNA_D-dichotoma_M_contig1499.3563.1	4	0	1	39	10	33	3	4	0	1	3	0	2	0	6	2	0	1	14	0	1	0	11	21	1	22	40
mRNA_D-dichotoma_M_contig496.15186.1	7	4	2	5	0	3	21	1	11	2	3	1	38	164	119	92	68	38	134	61	18	12	152	70	51	39	36
mRNA_D-dichotoma_M_contig496.15191.1	406	318	304	6	1	2	344	180	473	545	277	288	10230	6561	9550	13072	8859	6415	8869	9455	3848	4392	12115	7937	6457	8841	7433
mRNA_D-dichotoma_M_contig497.15203.1	27	18	7	1	0	0	4	6	0	4	0	0	1	3	89	13	0	1	1	0	0	0	4	4	13	0	0
mRNA_D-dichotoma_M_contig498.15211.1	4	0	0	1	0	0	9	0	0	19	0	0	367	936	415	812	441	456	623	463	694	467	578	855	725	613	463
mRNA_D-dichotoma_M_contig498.15212.1	111	52	26	1985	390	826	125	29	48	172	63	71	1195	4527	2456	4791	2006	3342	1175	837	212	761	2330	3787	2421	2523	484
mRNA_D-dichotoma_M_contig498.15215.1	6	0	0	0	0	0	5	0	0	1	0	0	15	20	18	22	12	5	9	4	3	2	44	28	15	20	12
mRNA_D-dichotoma_M_contig2828.9775.1	5	3	0	18	1	4	11	0	0	9	0	0	561	772	1337	817	1012	510	1520	1034	294	283	2246	1721	1407	882	2011
mRNA_D-dichotoma_M_contig2828.9776.1	5	4	2	0	0	0	9	3	1	4	1	0	0	0	0	0	0	0	0	0	0	0	0	0	1	0	0
mRNA_D-dichotoma_M_contig2829.9779.1	0	0	0	0	0	0	0	0	0	0	0	0	2	0	5	4	0	0	4	0	0	0	1	7	0	0	1
mRNA_D-dichotoma_M_contig2833.9791.1	1	0	0	0	0	0	0	0	0	0	0	0	18	19	7	20	0	6	11	8	11	10	17	20	12	9	9
mRNA_D-dichotoma_M_contig2833.9793.1	195	100	112	0	0	0	265	73	79	111	18	22	1558	941	1990	1070	974	723	1120	1130	798	772	1041	789	977	773	900
mRNA_D-dichotoma_M_contig2834.9795.1	12	2	6	0	2	0	12	2	1	2	0	2	33	232	49	44	74	138	24	26	53	80	37	65	107	41	36
mRNA_D-dichotoma_M_contig2835.9796.1	0	0	0	0	0	0	0	0	0	0	0	0	57	325	22	66	16	54	28	25	16	54	108	285	137	69	77
mRNA_D-dichotoma_M_contig907.19809.1	0	0	0	0	0	0	0	0	0	0	0	0	62	354	100	111	35	131	110	104	62	65	34	47	31	26	34
mRNA_D-dichotoma_M_contig909.19821.1	3	0	0	1	0	0	9	0	0	11	0	0	236	153	117	87	83	76	114	87	197	144	105	158	137	148	104
mRNA_D-dichotoma_M_contig910.19850.1	6	11	3	0	0	0	15	0	0	2	3	3	263	5	29	6	41	1	1	3	0	23	360	1159	1102	674	372
mRNA_D-dichotoma_M_contig911.19854.1	13	6	1	10	0	7	24	3	1	13	1	1	48	78	73	27	32	65	100	53	22	21	137	128	76	31	24
mRNA_D-dichotoma_M_contig911.19855.1	22	8	7	72	7	49	49	16	15	27	10	3	92	353	154	157	58	167	514	273	173	109	374	268	131	123	182
mRNA_D-dichotoma_M_contig911.19856.1	0	0	1	18	7	6	1	0	0	1	0	0	9	22	2	4	0	9	3	3	13	11	17	28	8	11	43
mRNA_D-dichotoma_M_contig911.19861.1	108	55	64	1	3	0	99	23	40	47	15	17	761	1175	1318	1230	680	770	1063	854	248	372	1036	994	937	837	374
mRNA_D-dichotoma_M_contig1561.3934.1	1	0	1	0	3	0	2	0	2	0	0	0	0	0	0	0	1	0	0	0	0	0	0	0	0	0	0
mRNA_D-dichotoma_M_contig1562.3937.1	0	0	0	0	0	0	2	0	0	0	0	0	71	145	84	31	21	138	137	90	21	19	127	132	126	34	24
mRNA_D-dichotoma_M_contig1562.3941.1	2	0	1	0	0	1	2	2	0	4	0	1	13	42	39	35	22	70	26	15	13	32	15	81	51	34	7
mRNA_D-dichotoma_M_contig1563.3947.1	97	75	62	3	0	2	124	43	33	113	36	27	540	1259	961	1145	684	965	1002	848	517	745	925	964	1322	1475	639
mRNA_D-dichotoma_M_contig1564.3951.1	39	40	14	0	0	0	60	12	34	76	23	29	43	112	57	83	106	82	322	190	73	43	171	121	104	43	50
mRNA_D-dichotoma_M_contig1564.3954.1	38	10	12	103	29	57	176	45	55	99	30	26	224	430	445	597	330	324	592	437	446	264	855	440	298	442	410
mRNA_D-dichotoma_M_contig124.1897.1	5	2	8	0	0	0	1	0	0	0	0	1	1696	540	1708	795	813	302	681	541	64	147	910	817	808	671	169
mRNA_D-dichotoma_M_contig124.1905.1	207	111	159	0	0	0	183	50	48	434	192	192	4487	2892	4131	4961	2807	1996	4141	4007	1577	1245	4954	3292	2159	3248	2363
mRNA_D-dichotoma_M_contig1623.4363.1	0	0	0	0	0	0	0	0	0	1	0	0	0	1	0	0	0	0	2	0	0	0	1	0	0	0	1
mRNA_D-dichotoma_M_contig1625.4367.1	0	0	0	0	0	0	0	0	0	0	0	0	0	0	0	0	0	0	1	0	0	0	1	0	0	0	0
mRNA_D-dichotoma_M_contig1626.4373.1	0	0	0	2	0	0	3	0	0	1	0	0	2	3	5	0	1	3	4	5	1	2	13	2	2	0	4
mRNA_D-dichotoma_M_contig4861.15002.1	1	2	1	0	1	0	1	0	0	5	0	0	7	3	55	10	0	5	61	44	8	7	1	8	3	2	0
mRNA_D-dichotoma_M_contig4861.15003.1	3	0	0	0	0	0	6	0	0	11	0	0	40	183	81	939	1062	44	108	80	26	73	300	183	112	872	288
mRNA_D-dichotoma_M_contig4867.15009.1	28	15	8	9	3	9	63	11	9	51	20	17	778	976	922	622	652	423	165	143	414	262	724	634	544	442	562
mRNA_D-dichotoma_M_contig4870.15023.1	0	0	0	0	0	0	0	0	0	0	0	0	0	0	0	0	0	0	0	0	0	0	0	1	0	0	0
mRNA_D-dichotoma_M_contig4873.15025.1	1	0	1	1	0	0	0	1	0	86	40	50	20	19	83	17	30	13	65	27	11	3	37	16	8	24	25
mRNA_D-dichotoma_M_contig4873.15026.1	2	0	0	1	0	0	0	1	0	39	29	37	8	3	22	22	24	6	51	24	0	8	11	18	5	15	22
mRNA_D-dichotoma_M_contig4880.15035.1	427	306	170	0	0	0	350	110	108	123	20	16	10	0	155	21	0	20	128	99	4	13	0	0	0	0	0
mRNA_D-dichotoma_M_contig4880.15036.1	100	4	8	0	0	0	16	6	7	5	2	0	0	0	70	0	0	3	19	11	0	0	0	0	0	0	0
mRNA_D-dichotoma_M_contig4890.15055.1	0	0	0	0	0	0	0	0	0	1	0	0	6	5	6	29	4	1	8	9	0	0	16	8	7	4	3
mRNA_D-dichotoma_M_contig4891.15057.1	49	31	23	6	23	15	63	40	39	112	19	20	15	2	2	0	2	3	15	14	1	3	5	16	28	16	5
mRNA_D-dichotoma_M_contig4901.15102.1	0	0	0	0	0	0	0	0	0	2	0	0	34	47	21	53	15	35	39	32	58	54	31	56	59	22	75
mRNA_D-dichotoma_M_contig5754.16553.1	0	0	0	0	0	0	0	0	0	0	0	0	0	0	0	0	0	0	0	0	0	0	0	0	0	0	0
mRNA_D-dichotoma_M_contig5757.16555.1	0	0	0	0	0	0	0	0	0	0	0	0	0	0	0	1	0	0	0	0	0	0	0	0	0	0	0
mRNA_D-dichotoma_M_contig5773.16570.1	0	0	0	0	0	0	1	0	0	6	0	0	2	12	42	13	11	7	56	48	12	10	7	10	8	21	2
mRNA_D-dichotoma_M_contig5780.16579.1	0	0	0	0	0	0	1	0	1	8	2	1	0	3	0	0	0	0	0	0	0	0	0	0	0	1	0
mRNA_D-dichotoma_M_contig5793.16591.1	0	0	0	0	0	0	0	0	0	0	0	0	0	0	0	0	0	0	2	0	0	0	2	12	16	6	3
mRNA_D-dichotoma_M_contig5805.16649.1	0	0	0	0	0	0	0	0	0	13	8	5	384	117	47	33	110	300	3	25	42	120	38	123	110	60	74
mRNA_D-dichotoma_M_contig5810.16656.1	2	0	0	0	0	0	10	2	0	1	0	0	6	15	18	19	2	9	23	23	3	5	6	8	1	3	4
mRNA_D-dichotoma_M_contig5813.16657.1	2	0	0	0	0	0	0	0	1	2	1	3	498	60	54	34	6	42	310	295	7	21	596	111	349	125	77
mRNA_D-dichotoma_M_contig5813.16658.1	0	0	0	0	0	0	0	0	0	0	0	0	673	4	5	12	11	13	201	124	0	4	301	43	136	39	11
mRNA_D-dichotoma_M_contig74.18248.1	1	0	1	0	0	0	2	4	0	2	1	0	283	172	472	747	625	326	445	362	77	171	614	485	282	505	330
mRNA_D-dichotoma_M_contig1032.358.1	6	4	2	10	1	1	9	4	4	9	5	10	23	98	79	124	58	59	36	51	14	15	31	49	43	51	12
mRNA_D-dichotoma_M_contig1034.378.1	185	118	111	3	0	0	247	88	83	195	52	44	22	38	180	73	14	26	385	145	40	32	16	1	2	2	1
mRNA_D-dichotoma_M_contig1035.385.1	9	2	0	1	0	0	6	1	1	148	40	34	10	25	18	8	32	1	18	3	4	5	22	17	6	11	2
mRNA_D-dichotoma_M_contig1035.387.1	1	0	0	0	0	0	1	0	0	0	0	0	0	1	0	0	0	0	0	0	0	0	0	0	1	0	0
mRNA_D-dichotoma_M_contig1036.392.1	29	26	32	423	21	269	41	30	46	38	30	24	1083	589	1445	1332	922	923	1034	1068	306	452	1130	917	895	884	517
mRNA_D-dichotoma_M_contig1734.4954.1	0	0	1	67	16	21	1	0	0	1	0	0	0	0	0	17	1	0	0	0	9	4	2	0	0	0	8
mRNA_D-dichotoma_M_contig1734.4959.1	0	0	0	19	2	2	1	1	0	1	1	1	0	0	0	0	14	0	2	0	0	2	1	26	6	7	29
mRNA_D-dichotoma_M_contig1734.4960.1	1	0	0	27	3	9	1	0	0	0	0	0	0	0	2	2	0	2	0	0	0	0	0	10	5	15	12
mRNA_D-dichotoma_M_contig197.6102.1	4	4	5	1	4	0	1	3	3	0	2	3	121	96	172	401	337	125	187	222	70	93	163	147	135	222	163
mRNA_D-dichotoma_M_contig198.6146.1	4	10	2	88	85	15	6	0	6	10	0	2	0	0	0	1	0	0	4	2	0	0	0	11	2	2	5
mRNA_D-dichotoma_M_contig198.6147.1	5	1	1	51	106	15	5	0	4	19	0	0	0	0	0	1	10	0	1	1	0	0	3	2	3	2	0
mRNA_D-dichotoma_M_contig2099.6827.1	0	0	0	0	0	0	0	0	0	0	0	0	0	0	0	2	0	0	0	0	0	3	0	0	0	0	0
mRNA_D-dichotoma_M_contig2101.6876.1	11	0	1	4	0	0	8	0	0	2	3	0	1	8	0	4	0	2	2	0	1	2	9	1	7	3	1
mRNA_D-dichotoma_M_contig2102.6880.1	0	0	0	0	0	0	0	0	0	0	0	0	0	0	0	0	0	0	0	0	0	0	0	0	0	0	0
mRNA_D-dichotoma_M_contig1516.3672.1	27	13	11	148	71	67	22	18	26	31	7	14	71	66	140	121	124	43	104	67	17	20	138	50	69	70	39
mRNA_D-dichotoma_M_contig1517.3677.1	0	0	0	0	0	0	0	0	0	0	0	0	0	0	0	0	0	0	0	0	2	0	0	0	0	0	0
mRNA_D-dichotoma_M_contig1518.3678.1	0	0	0	0	0	0	0	0	0	0	0	0	0	0	0	0	0	0	0	0	0	0	0	0	0	0	0
mRNA_D-dichotoma_M_contig1519.3686.1	101	49	76	5764	592	2565	250	35	80	33	8	15	177	35	668	76	13	72	965	572	55	45	446	879	49	1829	389
mRNA_D-dichotoma_M_contig1522.3717.1	0	0	0	0	0	0	0	0	0	0	0	0	0	0	0	0	0	0	0	0	0	0	0	0	0	0	0
mRNA_D-dichotoma_M_contig213.7012.1	33	32	44	872	205	461	44	23	79	99	51	74	3793	1760	3651	4836	3020	2826	3354	3427	1761	1471	3656	2676	2287	3269	2777
mRNA_D-dichotoma_M_contig213.7017.1	207	70	113	54	7	21	203	86	105	162	42	37	3546	3170	3269	2513	1360	2431	3799	3110	1940	1730	3084	3082	2927	1608	1358
mRNA_D-dichotoma_M_contig214.7049.1	1	1	1	0	0	0	3	1	2	1	0	3	37	63	85	258	183	35	78	80	18	54	122	106	65	148	62
mRNA_D-dichotoma_M_contig214.7050.1	0	1	1	0	0	0	6	0	3	3	0	1	33	120	53	153	86	57	66	60	19	21	86	96	69	100	66
mRNA_D-dichotoma_M_contig215.7110.1	0	0	0	64	34	16	0	0	0	0	0	0	0	0	0	0	0	0	0	0	0	0	1	0	0	4	1
mRNA_D-dichotoma_M_contig215.7113.1	0	0	0	147	32	30	0	0	0	1	0	0	0	0	0	0	0	0	0	0	0	0	0	0	0	0	0
mRNA_D-dichotoma_M_contig1388.2853.1	0	0	1	0	0	1	0	0	0	4	1	1	46	56	19	28	21	5	6	9	1	3	276	175	161	142	63
mRNA_D-dichotoma_M_contig1388.2859.1	0	0	0	105	23	23	0	0	0	1	0	0	0	0	0	0	0	0	0	0	0	0	1	4	0	0	0
mRNA_D-dichotoma_M_contig1389.2862.1	0	0	0	0	0	0	0	0	0	0	0	0	0	0	0	1	0	0	0	0	0	0	0	0	0	0	0
mRNA_D-dichotoma_M_contig1390.2896.1	0	0	0	20	0	4	0	0	0	1	1	0	0	0	0	0	0	0	0	0	1	0	0	0	0	0	0
mRNA_D-dichotoma_M_contig1390.2897.1	0	1	4	156	17	154	7	1	11	12	4	3	0	0	8	4	0	1	24	8	1	0	5	23	1	82	109
mRNA_D-dichotoma_M_contig1391.2899.1	185	90	120	0	0	0	186	68	108	97	34	32	343	537	622	586	417	591	886	718	81	248	721	525	670	544	161
mRNA_D-dichotoma_M_contig1391.2900.1	8	0	1	9	0	0	8	1	0	5	0	1	62	61	59	268	118	121	132	93	36	53	222	162	180	122	35
mRNA_D-dichotoma_M_contig1391.2901.1	1	0	3	0	0	0	2	0	1	0	1	0	0	1	1	1	0	1	3	1	2	0	1	3	4	0	0
mRNA_D-dichotoma_M_contig1601.4209.1	0	0	0	17	8	2	0	0	0	0	0	0	0	0	0	0	0	0	0	0	0	0	0	0	0	0	2
mRNA_D-dichotoma_M_contig1601.4211.1	17	8	10	7	3	8	35	10	15	41	13	20	183	306	300	628	366	282	382	392	261	232	549	383	384	482	421
mRNA_D-dichotoma_M_contig1602.4218.1	0	0	0	0	0	0	0	0	0	0	0	0	0	0	0	0	0	0	0	0	0	0	0	0	0	0	0
mRNA_D-dichotoma_M_contig1605.4229.1	53	22	29	0	10	4	33	16	24	18	6	11	1753	1353	1680	1765	2273	1148	1718	1146	330	634	2980	1714	1773	2042	937
mRNA_D-dichotoma_M_contig1605.4232.1	2	2	1	0	0	0	0	0	0	18	4	1	0	5	1	7	0	2	2	2	2	7	3	3	9	0	0
mRNA_D-dichotoma_M_contig4167.13571.1	0	0	0	0	0	0	0	0	0	0	0	0	54	68	22	14	36	10	42	29	5	6	89	41	50	23	15
mRNA_D-dichotoma_M_contig4176.13586.1	64	43	73	0	0	0	60	46	44	102	33	43	1837	1743	1979	1724	1590	1084	1341	1204	1397	1142	1867	1618	1825	1293	1720
mRNA_D-dichotoma_M_contig4178.13589.1	1	0	0	1	0	0	0	0	0	0	0	0	50	73	33	53	45	55	83	92	33	45	76	64	52	31	50
mRNA_D-dichotoma_M_contig4179.13591.1	3	3	0	27	48	12	11	4	6	16	3	4	23	62	71	94	37	34	69	59	51	28	55	78	28	26	40
mRNA_D-dichotoma_M_contig4180.13597.1	17	1	1	33	13	3	60	6	3	40	7	5	2605	6169	3188	2953	1580	1933	2716	2080	1014	930	3035	3103	2846	1769	1369
mRNA_D-dichotoma_M_contig4186.13603.1	0	0	0	0	0	0	0	0	0	1	0	0	49	49	53	82	45	0	0	0	0	0	221	124	77	94	65
mRNA_D-dichotoma_M_contig4186.13604.1	0	0	0	1	1	0	0	0	0	1	0	0	134	114	87	102	92	0	0	0	0	0	409	156	138	137	125
mRNA_D-dichotoma_M_contig4193.13613.1	0	0	0	0	0	0	1	0	0	2	0	0	13	12	6	5	2	4	39	30	2	2	45	6	10	13	3
mRNA_D-dichotoma_M_contig4193.13614.1	0	0	0	0	0	0	0	0	0	0	0	0	3	3	3	4	0	3	3	4	0	0	2	2	5	1	2
mRNA_D-dichotoma_M_contig4193.13616.1	7	1	2	0	0	0	3	0	2	5	2	1	352	115	217	34	40	257	230	117	18	36	102	131	312	22	27
mRNA_D-dichotoma_M_contig208.6756.1	0	0	0	0	0	0	6	0	1	2	2	0	0	0	0	0	0	0	0	0	0	0	0	8	3	0	0
mRNA_D-dichotoma_M_contig208.6759.1	18	9	4	0	0	0	14	13	5	10	6	5	117	84	257	140	176	95	195	146	30	45	226	153	154	137	93
mRNA_D-dichotoma_M_contig208.6760.1	22	4	10	3	2	3	12	5	7	12	1	2	95	50	216	136	106	60	200	134	18	27	210	166	158	86	69
mRNA_D-dichotoma_M_contig4598.14492.1	0	0	0	0	0	0	0	0	0	0	0	0	20	30	8	54	50	277	189	170	84	67	78	120	153	46	12
mRNA_D-dichotoma_M_contig4599.14496.1	0	0	0	0	0	0	0	0	0	0	0	0	0	3	1	0	0	0	1	0	0	0	2	0	1	3	0
mRNA_D-dichotoma_M_contig4599.14497.1	1	0	0	0	0	0	2	0	1	1	2	4	131	155	119	126	55	101	89	62	41	39	222	144	118	100	55
mRNA_D-dichotoma_M_contig4601.14518.1	0	0	0	1	0	0	0	0	0	0	0	0	0	1	0	0	11	0	0	0	0	0	1	0	0	0	0
mRNA_D-dichotoma_M_contig4605.14522.1	6	1	1	0	0	0	7	2	8	11	3	3	165	155	212	148	108	27	315	261	10	4	574	276	302	216	176
mRNA_D-dichotoma_M_contig4607.14525.1	4	0	0	12	0	0	1	0	0	3	0	1	53	61	63	67	29	42	177	150	9	23	30	19	29	12	14
mRNA_D-dichotoma_M_contig4612.14538.1	0	0	0	0	0	0	0	0	0	0	0	0	2	0	0	1	0	0	1	2	0	1	0	2	1	0	1
mRNA_D-dichotoma_M_contig4614.14543.1	1	0	0	0	0	0	1	0	0	2	0	0	178	84	58	86	108	46	130	142	19	21	272	128	203	99	9
mRNA_D-dichotoma_M_contig5232.15724.1	31	3	15	785	37	165	26	2	0	25	2	1	874	2389	1386	598	540	636	23	32	551	571	1274	1089	1231	626	445
mRNA_D-dichotoma_M_contig5232.15725.1	62	1	2	6824	465	716	31	3	2	64	1	3	1240	2764	2173	1774	1140	1216	42	39	656	769	2495	2161	2082	1380	881
mRNA_D-dichotoma_M_contig5232.15726.1	66	1	6	519	26	74	17	2	52	27	2	2	705	1449	917	192	182	426	31	13	124	180	788	777	982	231	166
mRNA_D-dichotoma_M_contig5232.15728.1	5	0	3	4	3	2	29	4	1	20	0	2	252	641	280	670	410	262	356	258	153	149	844	670	479	522	373
mRNA_D-dichotoma_M_contig5249.15745.1	0	0	0	2	0	0	0	0	0	0	0	0	0	0	1	0	15	0	1	1	0	1	1	1	0	1	0
mRNA_D-dichotoma_M_contig5250.15752.1	4	0	2	0	0	0	4	1	0	0	1	0	0	6	7	2	12	0	2	0	4	0	0	0	3	1	0
mRNA_D-dichotoma_M_contig5252.15754.1	4	0	0	0	0	0	0	0	0	0	1	0	0	0	0	0	0	1	0	0	0	0	0	6	1	1	0
mRNA_D-dichotoma_M_contig5255.15755.1	0	0	0	0	0	0	0	0	0	0	0	0	0	0	0	0	0	0	0	0	0	0	0	0	0	0	0
mRNA_D-dichotoma_M_contig5264.15764.1	32	17	11	512	36	156	16	14	13	38	17	22	204	124	347	127	85	298	401	361	108	81	307	229	210	113	132
mRNA_D-dichotoma_M_contig339.11555.1	74	77	47	13	7	5	54	51	29	70	19	56	786	275	1009	498	381	426	688	608	352	323	959	352	587	345	379
mRNA_D-dichotoma_M_contig340.11594.1	1	0	0	0	0	0	3	0	2	11	1	0	38	230	73	87	54	17	10	20	2	5	294	245	149	118	80
mRNA_D-dichotoma_M_contig340.11599.1	0	0	0	0	0	0	0	0	0	1	0	0	0	0	0	0	0	0	0	0	0	0	0	0	0	0	0
mRNA_D-dichotoma_M_contig340.11600.1	0	0	0	0	0	0	0	1	0	0	0	0	0	0	0	0	0	0	0	0	0	0	0	0	0	0	0
mRNA_D-dichotoma_M_contig340.11601.1	0	0	0	31	3	4	0	0	0	5	0	1	6	26	18	13	8	0	0	0	0	0	76	45	38	60	67
mRNA_D-dichotoma_M_contig341.11627.1	1	0	0	218	22	62	12	0	0	1	1	0	14	10	4	7	40	5	18	13	3	2	13	23	3	13	2
mRNA_D-dichotoma_M_contig155.3857.1	0	0	0	2	0	1	0	1	0	1	1	1	1011	3506	1087	2452	916	390	5920	5328	128	167	2784	2023	369	398	337
mRNA_D-dichotoma_M_contig155.3867.1	27	12	13	5	1	1	90	16	12	45	2	13	290	925	902	709	313	337	491	373	156	117	496	585	332	261	195
mRNA_D-dichotoma_M_contig155.3871.1	30	13	18	488	167	221	56	29	15	36	16	24	590	158	588	770	464	290	399	391	233	199	387	353	291	467	338
mRNA_D-dichotoma_M_contig526.15759.1	1	1	2	0	0	0	7	3	1	7	0	0	25	7	15	7	1	5	23	9	2	0	69	140	83	112	60
mRNA_D-dichotoma_M_contig527.15780.1	0	6	3	114	2	89	4	3	4	5	10	5	231	198	207	328	153	163	249	285	46	51	294	233	147	207	236
mRNA_D-dichotoma_M_contig527.15781.1	2	0	0	17	0	26	3	0	0	1	0	0	30	38	31	83	32	28	64	62	11	25	74	66	46	53	52
mRNA_D-dichotoma_M_contig527.15782.1	0	0	0	30	1	35	0	0	0	2	0	0	106	160	122	147	53	79	151	159	20	26	154	135	79	99	109
mRNA_D-dichotoma_M_contig528.15788.1	10	2	4	0	0	0	3	2	5	0	2	3	0	0	6	0	0	0	0	0	0	0	2	0	4	0	0
mRNA_D-dichotoma_M_contig1353.2665.1	0	2	2	2	7	4	0	0	0	5	2	2	37	56	104	106	95	90	78	109	14	20	63	80	47	80	18
mRNA_D-dichotoma_M_contig1353.2666.1	20	5	12	16	14	12	14	6	0	21	9	14	122	273	347	563	396	280	419	333	63	105	454	380	324	313	115
mRNA_D-dichotoma_M_contig1357.2679.1	1093	351	364	0	0	3	1046	400	303	744	120	163	3312	3771	4171	2967	3171	2541	4479	2499	1649	2042	6466	4795	4966	3385	2269
mRNA_D-dichotoma_M_contig1357.2682.1	8	0	0	0	2	0	28	2	2	77	18	15	7	61	20	43	46	34	20	19	94	29	6	23	16	14	38
mRNA_D-dichotoma_M_contig1358.2684.1	0	0	0	0	0	0	0	0	0	0	0	0	0	0	0	0	0	0	0	0	0	0	0	1	0	2	0
mRNA_D-dichotoma_M_contig1358.2685.1	0	0	0	0	0	1	0	0	0	0	0	0	10	27	11	24	3	1	11	11	9	3	4	16	8	3	9
mRNA_D-dichotoma_M_contig1358.2686.1	1	0	0	0	3	1	0	0	0	0	0	0	18	24	52	29	1	7	21	9	7	6	23	30	19	6	18
mRNA_D-dichotoma_M_contig43.13868.1	16	1	20	3	0	1	15	11	15	36	10	18	800	1062	5439	1185	1402	273	3454	1621	758	273	1481	224	349	489	166
mRNA_D-dichotoma_M_contig43.13870.1	38	14	40	42	25	24	80	29	54	151	56	66	3151	1779	3854	6044	4156	1666	2182	2329	3194	2659	2945	2347	1816	4003	4038
mRNA_D-dichotoma_M_contig44.14070.1	5	0	0	85	8	55	2	3	2	13	3	5	11	3	23	8	31	18	30	10	9	12	6	45	23	103	168
mRNA_D-dichotoma_M_contig44.14074.1	0	0	1	0	0	0	2	0	1	2	0	0	11	1	6	9	0	2	9	6	2	3	10	10	24	18	23
mRNA_D-dichotoma_M_contig44.14076.1	0	0	1	3	2	2	4	1	0	1	0	0	0	0	3	0	0	0	0	0	2	0	10	12	2	22	26
mRNA_D-dichotoma_M_contig44.14077.1	44	32	17	201	208	74	86	20	26	24	7	1	1592	3286	1288	1580	1043	1212	2586	1892	322	464	4556	2945	1721	1466	806
mRNA_D-dichotoma_M_contig44.14082.1	1	0	0	1	1	2	2	1	2	5	0	1	38	106	202	394	324	165	229	282	17	42	275	156	149	215	87
mRNA_D-dichotoma_M_contig44.14083.1	18	3	15	16	1	5	18	9	15	25	8	21	406	339	639	502	300	431	557	592	230	219	554	437	520	408	386
mRNA_D-dichotoma_M_contig534.15898.1	114	54	68	0	1	1	44	19	50	276	156	137	5101	2526	3742	7886	3391	3917	4780	5138	1819	2587	6819	5122	2927	4642	4816
mRNA_D-dichotoma_M_contig534.15899.1	9	0	3	0	2	0	8	8	3	49	33	26	219	216	293	903	488	293	442	548	122	84	696	266	162	423	340
mRNA_D-dichotoma_M_contig534.15901.1	8	0	2	0	0	0	4	1	4	33	19	13	76	65	106	234	100	105	142	200	33	18	297	84	48	67	93
mRNA_D-dichotoma_M_contig534.15902.1	0	0	0	0	0	0	1	2	5	11	9	6	52	32	88	191	79	77	91	138	28	15	208	56	20	87	43
mRNA_D-dichotoma_M_contig534.15903.1	2	2	1	3	1	2	2	4	3	29	13	15	104	127	170	279	133	119	184	246	35	17	344	94	26	130	94
mRNA_D-dichotoma_M_contig534.15904.1	28	7	16	81	7	18	27	5	12	17	3	3	366	152	511	471	221	212	344	277	110	131	368	293	293	351	182
mRNA_D-dichotoma_M_contig534.15912.1	56	22	35	19	0	7	25	19	11	39	18	19	1727	786	1954	1644	1241	1129	933	988	684	718	1245	1170	965	1001	1373
mRNA_D-dichotoma_M_contig534.15917.1	22	5	4	15	5	26	4	4	8	10	2	3	123	147	265	932	607	239	282	275	313	442	303	206	244	685	548
mRNA_D-dichotoma_M_contig534.15918.1	56	25	48	75	4	68	39	20	27	42	20	14	902	970	1268	1608	1161	1163	1301	1215	723	972	1202	1090	1256	1452	1021
mRNA_D-dichotoma_M_contig536.15928.1	0	0	0	0	0	0	0	0	0	0	0	0	0	0	0	0	0	0	0	0	0	0	0	0	0	2	0
mRNA_D-dichotoma_M_contig536.15933.1	69	62	24	18	41	2	159	47	53	114	25	32	123	130	72	428	211	51	151	98	112	158	139	97	97	273	366
mRNA_D-dichotoma_M_contig536.15936.1	1	0	3	34	31	6	2	0	0	1	0	0	2	3	7	10	3	11	12	9	1	2	13	10	3	1	2
mRNA_D-dichotoma_M_contig536.15937.1	4	2	0	41	24	15	3	2	7	1	1	1	191	75	272	326	221	88	109	132	23	66	193	118	94	123	135
mRNA_D-dichotoma_M_contig536.15939.1	15	10	6	3	0	2	4	7	5	6	0	0	236	147	288	79	97	166	217	196	37	52	286	241	281	57	69
mRNA_D-dichotoma_M_contig278.9574.1	16	7	3	4	0	0	24	8	0	23	12	14	60	38	69	70	29	49	81	53	20	23	187	76	92	69	67
mRNA_D-dichotoma_M_contig278.9579.1	16	5	2	28	0	1	21	2	4	11	3	1	2	4	9	4	0	0	5	8	1	0	6	3	2	11	10
mRNA_D-dichotoma_M_contig279.9626.1	13	2	2	0	0	0	9	0	2	17	0	0	311	4716	2295	6585	3001	767	1802	1157	1203	1207	1430	3232	1304	1984	1418
mRNA_D-dichotoma_M_contig280.9685.1	0	0	0	0	0	0	0	0	0	1	0	0	0	0	0	0	0	0	0	0	0	0	0	0	0	0	0
mRNA_D-dichotoma_M_contig280.9690.1	0	0	0	1	0	0	0	0	0	0	0	0	10	10	0	0	0	0	0	0	0	0	0	1	0	0	0
mRNA_D-dichotoma_M_contig1631.4408.1	0	0	0	0	0	0	1	0	0	0	0	0	68	5	19	10	13	20	76	64	6	18	74	28	79	133	39
mRNA_D-dichotoma_M_contig1633.4418.1	6	7	7	300	15	184	13	7	13	2	3	1	2	7	78	7	13	4	96	39	0	6	9	16	2	48	166
mRNA_D-dichotoma_M_contig1635.4423.1	10	1	0	0	0	0	3	0	0	14	2	1	283	1050	184	336	644	1550	404	304	265	961	537	905	703	681	384
mRNA_D-dichotoma_M_contig1635.4427.1	0	1	0	0	0	0	1	0	0	3	0	0	1	5	15	11	7	5	44	18	2	1	19	12	8	6	13
mRNA_D-dichotoma_M_contig1000.103.1	8	3	0	0	0	0	10	0	0	14	1	0	571	300	90	74	33	952	186	153	142	229	66	591	798	96	82
mRNA_D-dichotoma_M_contig997.20569.1	31	11	11	3	1	2	20	10	16	23	6	7	8	12	3	6	20	8	29	27	3	7	5	11	4	15	16
mRNA_D-dichotoma_M_contig997.20570.1	412	226	294	1124	308	582	171	195	143	207	117	129	5934	2409	5899	8836	6076	6024	4582	5340	8097	9270	4310	3691	3729	6298	8296
mRNA_D-dichotoma_M_contig998.20573.1	5	1	0	11	0	15	4	1	2	18	10	8	144	89	138	129	146	60	107	133	73	41	329	96	73	105	121
mRNA_D-dichotoma_M_contig7.17867.1	0	0	0	1	0	0	0	0	0	3	0	0	0	0	0	0	0	0	3	0	1	0	0	12	3	1	0
mRNA_D-dichotoma_M_contig7.17868.1	13	0	1	56	151	7	18	8	0	60	0	5	5	26	7	3	15	12	9	6	1	11	28	83	63	34	7
mRNA_D-dichotoma_M_contig7.17874.1	7	4	2	28	17	5	5	7	3	12	4	5	623	238	1025	742	669	365	487	568	146	179	661	448	298	390	328
mRNA_D-dichotoma_M_contig7.17886.1	5	2	2	0	0	0	1	5	3	12	0	5	178	74	149	61	103	138	144	135	40	29	169	81	75	36	59
mRNA_D-dichotoma_M_contig7.17888.1	0	0	0	0	0	0	0	0	0	0	0	0	0	0	0	1	0	0	0	0	0	0	0	0	0	0	4
mRNA_D-dichotoma_M_contig744.18289.1	14	14	8	1	1	2	83	11	13	2280	1060	1127	240	270	315	151	193	149	629	209	171	156	1880	228	318	351	211
mRNA_D-dichotoma_M_contig746.18303.1	0	0	0	0	0	0	0	0	0	0	0	0	8	2	5	3	0	0	4	3	2	0	5	21	33	10	5
mRNA_D-dichotoma_M_contig164.4447.1	6	0	2	1	0	2	3	0	1	15	1	3	2	35	24	5	0	10	43	16	4	3	15	7	22	4	5
mRNA_D-dichotoma_M_contig165.4498.1	276	90	242	45	12	49	65	81	157	60	31	32	3466	2105	4904	4332	2992	2650	3154	3701	1577	1753	3916	2656	1918	3033	3144
mRNA_D-dichotoma_M_contig1815.5373.1	2	0	1	22	1	1	7	2	0	21	1	0	149	214	174	154	89	158	286	216	53	64	182	149	94	92	93
mRNA_D-dichotoma_M_contig1816.5374.1	4	0	2	45	88	39	20	0	0	11	3	1	38	41	45	66	10	19	104	124	4	16	44	48	43	42	54
mRNA_D-dichotoma_M_contig1819.5379.1	4	2	8	61	23	44	5	6	6	2	1	0	1	18	39	113	55	19	43	51	10	18	26	17	5	45	18
mRNA_D-dichotoma_M_contig1820.5393.1	6	2	3	4337	977	1127	36	7	5	14	2	5	104	51	115	256	183	131	103	125	260	178	116	62	102	189	195
mRNA_D-dichotoma_M_contig1820.5394.1	56	18	29	19739	7561	12578	58	67	30	57	29	32	1839	769	2461	2859	2826	2333	2160	2737	2899	2026	2401	1551	1661	2219	2124
mRNA_D-dichotoma_M_contig1822.5398.1	146	58	56	21390	2986	8826	328	132	133	348	116	133	1827	3425	4040	5029	2384	2128	5698	4705	1417	928	5498	2975	2446	2374	1979
mRNA_D-dichotoma_M_contig691.17796.1	93	35	45	24	5	22	113	28	46	97	24	22	43	418	300	150	326	75	278	155	45	41	86	93	26	105	72
mRNA_D-dichotoma_M_contig692.17806.1	16	0	14	1	0	0	11	3	2	3	0	2	535	286	357	303	406	304	276	204	54	114	637	486	551	408	155
mRNA_D-dichotoma_M_contig693.17808.1	0	0	0	0	0	0	0	0	0	0	0	0	6	0	0	7	1	0	1	2	0	1	3	2	2	1	0
mRNA_D-dichotoma_M_contig693.17809.1	1	0	2	36	4	73	0	0	1	2	2	1	24	75	26	118	34	39	63	62	48	65	49	64	41	132	128
mRNA_D-dichotoma_M_contig693.17812.1	19	18	19	117	24	54	9	17	33	25	19	29	1260	519	1701	1836	2037	852	1061	1524	412	579	1175	859	671	1431	746
mRNA_D-dichotoma_M_contig694.17819.1	4	1	0	5	0	0	12	0	2	8	1	0	4	3	3	0	1	2	8	5	2	3	8	3	22	10	10
mRNA_D-dichotoma_M_contig694.17820.1	3	2	0	1	6	6	10	2	0	10	1	1	0	1	1	0	2	2	2	1	0	0	5	11	7	0	0
mRNA_D-dichotoma_M_contig1249.1949.1	233	109	164	187	95	84	159	123	117	203	77	99	4824	1984	2921	2311	1659	3272	3040	4270	1108	1336	4254	2450	3292	2232	2346
mRNA_D-dichotoma_M_contig1251.1972.1	2	0	0	0	0	0	1	0	0	13	0	0	6	1	0	2	0	1	4	5	0	0	0	4	7	0	1
mRNA_D-dichotoma_M_contig1253.1978.1	309	153	172	20	6	9	196	195	106	160	30	56	4053	2926	5274	4981	4162	3173	4713	4451	3286	2833	4366	3636	4036	3813	3472
mRNA_D-dichotoma_M_contig1253.1981.1	281	171	130	84	9	80	287	98	174	376	160	195	14539	8165	13472	20078	10415	9016	12800	14242	6958	6946	15212	10135	9312	14179	12289
mRNA_D-dichotoma_M_contig238.8103.1	0	0	0	27	7	7	0	0	0	1	0	0	10	9	1	1	0	0	8	1	2	0	2	0	5	0	1
mRNA_D-dichotoma_M_contig238.8104.1	0	0	1	15	0	5	0	0	0	0	1	1	0	0	1	53	27	0	1	0	7	27	0	1	0	43	57
mRNA_D-dichotoma_M_contig238.8109.1	0	0	0	10	0	0	2	0	0	2	0	0	60	58	28	10	0	25	88	81	12	27	139	57	92	78	75
mRNA_D-dichotoma_M_contig238.8110.1	18	0	0	482	0	0	38	0	0	43	0	0	323	74	141	86	49	121	484	305	72	100	560	294	526	381	405
mRNA_D-dichotoma_M_contig238.8114.1	72	50	59	75	12	44	41	52	57	37	28	29	1816	1001	1545	1679	1569	1108	1261	1444	536	701	1482	1478	1130	1605	780
mRNA_D-dichotoma_M_contig239.8142.1	88	79	95	0	1	1	173	79	112	175	78	63	156	268	1093	267	166	87	378	161	196	75	282	61	74	68	38
mRNA_D-dichotoma_M_contig239.8147.1	51	10	20	94	2	70	12	13	8	9	1	1	16	0	103	20	6	26	377	227	8	20	16	61	1	26	119
mRNA_D-dichotoma_M_contig239.8149.1	6	0	1	27	17	25	5	1	0	6	4	5	277	91	262	722	616	147	197	216	118	162	234	222	145	393	282
mRNA_D-dichotoma_M_contig239.8150.1	6	1	2	77	29	15	10	0	1	7	3	4	253	117	300	550	646	179	275	248	75	112	406	233	205	368	196
mRNA_D-dichotoma_M_contig240.8206.1	3	1	3	37	1	18	6	0	1	19	1	7	48	81	21	23	36	76	40	21	11	33	104	57	44	46	76
mRNA_D-dichotoma_M_contig2633.9073.1	0	0	0	43	10	6	6	0	0	5	0	1	23	36	67	14	47	25	24	22	9	7	38	14	18	12	6
mRNA_D-dichotoma_M_contig2633.9074.1	5	0	0	0	0	0	0	0	4	1	0	1	170	214	292	372	182	142	191	162	96	170	218	166	131	254	222
mRNA_D-dichotoma_M_contig2636.9078.1	2	2	1	26	4	6	2	1	2	10	2	0	0	15	4	3	3	1	23	16	2	0	10	3	4	8	4
mRNA_D-dichotoma_M_contig2639.9083.1	0	0	0	5	0	0	2	0	0	1	0	0	39	40	21	16	10	13	82	23	5	9	64	46	25	20	1
mRNA_D-dichotoma_M_contig2645.9102.1	7	1	5	0	0	0	5	5	3	6	7	1	12	32	79	57	94	29	66	74	11	14	54	24	23	38	18
mRNA_D-dichotoma_M_contig938.20109.1	25	20	25	4145	912	2136	46	35	20	113	72	60	1970	1437	1860	2133	1132	978	1656	1825	722	821	2045	1589	1162	1699	1595
mRNA_D-dichotoma_M_contig940.20149.1	11	4	5	0	0	0	8	0	7	69	21	11	15	164	40	29	9	189	38	30	99	105	20	382	400	97	24
mRNA_D-dichotoma_M_contig941.20151.1	1	1	0	2	0	0	0	0	0	0	0	1	0	7	1	4	16	7	2	3	3	3	0	9	1	1	0
mRNA_D-dichotoma_M_contig3867.12797.1	7	4	2	0	0	0	5	3	1	7	3	0	463	324	497	320	304	213	211	176	98	123	248	205	306	226	186
mRNA_D-dichotoma_M_contig3870.12814.1	32	15	8	0	0	0	20	10	3	25	2	7	567	335	481	323	265	224	218	113	93	129	470	486	326	207	398
mRNA_D-dichotoma_M_contig3870.12815.1	0	0	0	0	0	0	0	0	0	1	1	2	6	0	5	0	0	0	0	1	3	0	0	0	4	0	3
mRNA_D-dichotoma_M_contig3872.12818.1	42	8	1	16	5	0	61	7	13	72	6	8	2135	5576	3652	2882	2196	2537	6594	5110	766	627	5033	5145	4050	2319	1189
mRNA_D-dichotoma_M_contig3873.12820.1	9	8	3	1	0	0	3	7	2	8	0	2	57	108	46	232	67	107	66	70	26	67	41	100	64	128	48
mRNA_D-dichotoma_M_contig3879.12828.1	79	31	43	8	3	2	113	56	23	48	42	30	852	1019	1846	1357	1079	625	1457	1281	260	255	1385	1058	918	787	519
mRNA_D-dichotoma_M_contig3887.12845.1	24	5	15	1613	38	693	25	4	10	12	4	2	84	271	445	49	63	55	483	211	18	34	330	155	75	180	96
mRNA_D-dichotoma_M_contig862.19397.1	17	16	26	0	0	0	10	14	17	27	8	12	666	498	1254	1764	1180	751	801	1167	441	348	1090	869	670	1014	571
mRNA_D-dichotoma_M_contig865.19420.1	118	74	65	155	42	99	220	56	28	99	25	37	4	25	65	33	29	5	25	10	9	4	29	70	13	109	286
mRNA_D-dichotoma_M_contig865.19422.1	3	0	2	2	0	0	0	0	0	4	0	0	297	184	322	363	282	213	292	283	66	93	391	262	278	323	306
mRNA_D-dichotoma_M_contig865.19423.1	281	204	234	174	20	118	256	275	215	115	58	103	3089	3713	4740	7474	5346	3530	3639	4199	5110	4769	3767	4085	4213	6074	4804
mRNA_D-dichotoma_M_contig866.19425.1	41	16	15	0	0	0	38	30	14	26	10	8	324	554	335	594	556	295	405	319	339	393	493	526	421	510	367
mRNA_D-dichotoma_M_contig1040.428.1	12	24	0	1	0	0	15	4	16	35	3	20	461	1561	770	1534	1408	1132	839	776	168	469	1279	1572	1232	1188	477
mRNA_D-dichotoma_M_contig1041.433.1	73	13	49	1	0	0	14	15	32	3	1	0	0	0	10	2	0	1	6	7	5	2	99	15	3	14	8
mRNA_D-dichotoma_M_contig3289.11302.1	0	0	0	0	0	0	0	0	0	0	0	1	63	181	69	238	92	70	83	58	20	86	153	294	187	244	398
mRNA_D-dichotoma_M_contig3289.11303.1	0	0	0	0	0	0	0	0	0	0	0	0	18	6	6	29	6	6	5	6	0	1	60	404	177	41	71
mRNA_D-dichotoma_M_contig3292.11316.1	22	4	3	0	0	0	17	4	3	4	2	0	8	0	20	1	0	4	41	48	2	7	20	9	0	5	3
mRNA_D-dichotoma_M_contig3293.11319.1	11	1	6	0	0	0	3	10	7	0	0	0	44	38	102	256	352	65	135	74	46	62	113	134	99	205	110
mRNA_D-dichotoma_M_contig3293.11320.1	14	3	19	0	0	2	6	15	8	1	0	0	141	125	233	280	256	156	233	165	64	89	127	168	174	201	113
mRNA_D-dichotoma_M_contig2288.7700.1	8	1	3	46	5	15	9	0	3	10	1	0	231	353	211	636	349	120	450	527	88	69	478	799	391	276	321
mRNA_D-dichotoma_M_contig2288.7708.1	1	0	0	4	2	0	0	0	0	2	0	0	0	8	2	2	0	4	2	6	1	3	6	1	4	1	0
mRNA_D-dichotoma_M_contig2289.7709.1	2	2	5	0	0	0	6	1	5	14	2	6	0	44	4	23	30	58	137	54	7	28	11	103	32	30	12
mRNA_D-dichotoma_M_contig2297.7743.1	7	0	1	879	85	662	5	1	2	16	1	4	0	35	9	6	0	13	9	8	12	5	18	170	7	136	475
mRNA_D-dichotoma_M_contig187.5608.1	5	0	5	0	1	0	14	3	6	9	0	3	281	175	427	180	171	78	263	225	72	40	196	175	193	143	80
mRNA_D-dichotoma_M_contig187.5609.1	2	0	0	0	0	0	7	1	5	2	0	4	82	78	165	88	37	38	91	81	16	15	111	62	59	52	19
mRNA_D-dichotoma_M_contig188.5660.1	3	1	4	177	64	79	0	4	9	9	4	4	69	104	191	256	180	71	127	195	50	23	185	82	31	137	89
mRNA_D-dichotoma_M_contig304.10538.1	0	0	0	0	0	0	0	0	0	0	0	0	0	0	0	1	0	0	0	0	0	0	0	0	0	0	0
mRNA_D-dichotoma_M_contig304.10539.1	2	0	3	2	1	3	2	2	4	11	4	8	950	281	810	884	566	253	905	1018	118	112	1566	651	278	744	340
mRNA_D-dichotoma_M_contig713.18032.1	0	0	0	0	0	0	0	0	0	0	0	0	1	0	0	0	0	0	0	0	0	0	0	0	1	1	0
mRNA_D-dichotoma_M_contig713.18036.1	108	124	96	1	0	2	139	74	91	132	49	67	473	837	1275	1316	595	524	1099	956	199	301	786	865	551	592	306
mRNA_D-dichotoma_M_contig714.18040.1	3	0	4	0	0	0	12	0	0	10	0	0	18	27	13	16	7	15	50	15	8	11	28	50	42	14	5
mRNA_D-dichotoma_M_contig715.18041.1	18	11	17	3	0	5	11	12	12	18	6	9	17	37	138	174	255	51	120	104	95	89	123	39	24	152	120
mRNA_D-dichotoma_M_contig715.18042.1	17	6	16	1	0	3	7	13	5	8	2	8	27	48	136	148	182	50	149	90	50	29	192	46	38	103	87
mRNA_D-dichotoma_M_contig715.18044.1	125	100	113	7	2	5	128	108	94	105	35	52	481	582	676	801	485	561	757	856	735	796	790	712	819	649	840
mRNA_D-dichotoma_M_contig715.18049.1	6	1	0	5	0	1	10	0	0	7	3	0	44	68	49	72	46	43	237	164	35	35	178	159	82	117	71
mRNA_D-dichotoma_M_contig715.18050.1	19	4	5	20	1	8	63	6	1	61	3	2	3260	5751	4684	6320	3656	3737	4201	3422	1957	1373	5891	4591	3500	3350	2535
mRNA_D-dichotoma_M_contig715.18051.1	0	0	2	3	0	0	2	0	0	5	0	2	7	98	13	30	41	15	3	8	4	5	1	13	4	6	6
mRNA_D-dichotoma_M_contig715.18053.1	2	0	0	0	0	0	2	0	0	6	0	0	42	47	36	32	30	15	1	4	11	5	36	27	26	13	8
mRNA_D-dichotoma_M_contig715.18056.1	2	0	2	1	0	3	26	4	2	29	6	2	11	33	36	46	7	1	1	3	1	3	63	67	41	29	14
mRNA_D-dichotoma_M_contig1657.4539.1	0	0	0	16	4	13	0	0	0	0	1	0	0	9	2	8	14	1	3	6	6	4	6	5	1	5	9
mRNA_D-dichotoma_M_contig1657.4540.1	2	19	6	0	0	6	15	17	12	8	5	7	610	736	758	2531	1990	778	1221	1107	387	650	1576	1111	1269	2686	1461
mRNA_D-dichotoma_M_contig1657.4544.1	0	0	2	7	0	1	6	0	4	14	1	0	31	49	87	43	40	50	80	46	10	16	181	31	44	11	19
mRNA_D-dichotoma_M_contig1657.4546.1	3	0	5	1	0	0	28	6	2	3	1	3	11	48	47	7	0	5	67	31	16	1	89	0	5	1	4
mRNA_D-dichotoma_M_contig1659.4555.1	0	0	0	0	0	0	0	0	0	0	0	0	0	0	0	0	0	1	0	1	1	0	2	0	1	0	1
mRNA_D-dichotoma_M_contig2039.6509.1	1	0	3	87	73	70	2	4	6	1	4	6	6	27	57	14	13	9	51	14	26	22	118	14	12	61	121
mRNA_D-dichotoma_M_contig2041.6529.1	124	86	66	0	0	1	89	92	49	154	53	32	159	147	22	246	68	155	294	185	65	331	703	1420	1853	1642	626
mRNA_D-dichotoma_M_contig2041.6530.1	1	2	3	0	0	0	0	2	1	2	3	1	0	0	0	5	0	0	4	2	0	6	10	20	11	1	0
mRNA_D-dichotoma_M_contig2047.6545.1	0	0	0	0	0	0	0	0	0	0	0	0	0	0	0	0	0	0	0	0	0	0	0	0	1	0	0
mRNA_D-dichotoma_M_contig264.9089.1	5	11	6	10	1	5	17	0	5	50	10	19	1	13	20	18	9	3	7	7	0	1	5	5	1	4	5
mRNA_D-dichotoma_M_contig264.9091.1	1	0	0	0	0	0	0	0	0	1	0	0	0	0	0	0	0	0	0	0	0	0	0	0	0	0	0
mRNA_D-dichotoma_M_contig265.9128.1	1	1	0	2	0	0	8	0	2	7	2	3	29	21	85	24	19	3	81	70	3	3	56	25	22	6	19
mRNA_D-dichotoma_M_contig266.9170.1	58	71	45	0	0	0	74	70	51	68	34	30	159	846	290	578	347	459	563	391	115	346	469	509	648	464	174
mRNA_D-dichotoma_M_contig266.9171.1	18	6	5	10	1	8	23	12	7	39	14	13	619	579	823	810	714	956	578	491	1034	1083	693	585	879	806	1744
mRNA_D-dichotoma_M_contig615.17042.1	2	0	1	0	0	1	4	7	4	7	1	4	0	20	8	25	11	8	2	1	0	3	6	41	12	23	13
mRNA_D-dichotoma_M_contig616.17056.1	2	0	7	3	0	2	11	5	7	3	1	2	21	14	15	11	8	6	33	9	14	5	68	37	17	17	37
mRNA_D-dichotoma_M_contig616.17057.1	3	3	5	6	1	1	5	4	11	3	1	4	61	20	43	19	8	12	35	25	0	4	66	62	47	29	21
mRNA_D-dichotoma_M_contig616.17058.1	34	9	9	24	2	10	45	19	16	36	8	16	1058	1534	1510	1346	928	764	741	587	253	336	1771	1394	979	868	600
mRNA_D-dichotoma_M_contig617.17061.1	135	242	126	93	41	69	312	190	138	262	88	101	1770	1117	1983	1737	1202	673	1061	1332	709	678	2057	1138	910	1390	1034
mRNA_D-dichotoma_M_contig617.17062.1	26	10	26	1	1	1	21	29	22	49	12	21	1669	1205	1634	1100	983	993	1255	1225	331	439	1789	1706	1392	1158	569
mRNA_D-dichotoma_M_contig618.17070.1	11	2	2	476	217	262	17	4	7	1	0	2	0	23	2	1	0	0	0	2	0	1	3	50	2	58	185
mRNA_D-dichotoma_M_contig619.17079.1	137	64	94	123	16	75	60	61	67	79	20	40	11241	3644	11829	10435	9380	4108	5454	6400	3081	5024	6710	6039	5497	6998	7059
mRNA_D-dichotoma_M_contig388.12834.1	52	48	51	1	0	1	35	22	45	58	33	28	3267	1491	4282	3367	2238	1461	3159	3496	585	728	3725	2308	1608	2038	1314
mRNA_D-dichotoma_M_contig389.12852.1	13	6	6	2	0	0	10	9	1	4	1	1	121	66	226	380	292	105	207	137	79	73	326	132	106	217	188
mRNA_D-dichotoma_M_contig290.10028.1	14	2	5	0	0	0	8	6	6	1	1	1	48	27	47	97	63	40	73	53	72	58	81	24	42	55	50
mRNA_D-dichotoma_M_contig290.10029.1	45	10	21	0	0	0	27	11	22	9	1	2	56	217	171	149	168	120	240	187	168	152	180	146	123	143	118
mRNA_D-dichotoma_M_contig290.10032.1	23	8	3	1	1	6	38	2	4	35	3	4	161	262	151	179	157	158	234	142	147	111	259	213	168	42	62
mRNA_D-dichotoma_M_contig291.10055.1	16	2	0	0	0	0	12	0	1	5	0	2	16	46	84	62	43	24	94	77	14	15	67	38	53	23	11
mRNA_D-dichotoma_M_contig291.10061.1	0	0	0	0	0	0	0	0	1	2	0	0	20	2	7	7	4	3	13	6	0	0	12	13	6	3	2
mRNA_D-dichotoma_M_contig291.10066.1	1	0	0	0	0	0	0	0	0	1	0	0	0	1	18	9	9	5	9	11	2	0	1	2	2	2	2
mRNA_D-dichotoma_M_contig291.10073.1	126	85	69	1	0	0	152	56	97	154	27	35	757	807	1262	1245	701	787	1116	1127	454	458	1617	1242	1088	1072	679
mRNA_D-dichotoma_M_contig292.10104.1	8	7	9	328	105	161	17	13	20	17	3	18	458	319	353	376	260	268	433	290	69	131	483	386	288	287	170
mRNA_D-dichotoma_M_contig292.10109.1	2	2	0	10	2	16	11	0	0	2	0	0	0	0	0	0	0	0	0	0	0	0	0	0	0	0	0
mRNA_D-dichotoma_M_contig292.10111.1	7	0	0	1016	15	24	11	4	0	15	0	0	205	241	189	74	35	156	193	171	46	20	204	267	86	54	76
mRNA_D-dichotoma_M_contig292.10112.1	4	0	1	425	52	96	0	0	0	1	1	0	27	26	18	47	26	19	36	44	12	14	47	32	24	31	22
mRNA_D-dichotoma_M_contig620.17100.1	0	1	0	1	0	0	1	0	0	0	2	4	719	173	76	136	150	262	222	190	97	242	218	169	476	193	312
mRNA_D-dichotoma_M_contig620.17106.1	45	25	23	2	0	0	64	40	52	109	35	26	533	498	819	836	642	262	866	563	415	357	873	650	745	464	500
mRNA_D-dichotoma_M_contig623.17138.1	63	42	38	1502	300	520	145	22	44	103	19	38	2302	1129	2174	2026	1058	897	1720	1302	460	511	1906	1605	1282	1329	780
mRNA_D-dichotoma_M_contig118.1445.1	0	0	0	0	0	0	0	0	0	0	0	0	0	0	0	0	0	0	0	0	0	0	0	0	0	0	0
mRNA_D-dichotoma_M_contig118.1456.1	29	15	24	9	5	4	103	33	55	107	41	58	3504	1430	3634	3204	2006	1249	1625	1690	2106	1284	2086	1765	1841	2109	2084
mRNA_D-dichotoma_M_contig118.1458.1	3	0	5	0	0	0	3	1	1	4	0	0	129	176	138	205	219	196	148	201	74	61	167	138	139	143	99
mRNA_D-dichotoma_M_contig118.1460.1	6	0	0	0	0	0	7	0	0	3	2	1	0	8	3	5	2	4	19	7	11	12	0	0	0	1	0
mRNA_D-dichotoma_M_contig1375.2770.1	44	22	18	20479	2847	8091	74	39	38	117	43	75	2139	1155	2672	2125	1511	1221	2029	2179	1160	943	2696	1375	1319	1530	2128
mRNA_D-dichotoma_M_contig1378.2789.1	14	12	9	7	5	11	12	7	10	13	5	9	612	411	1203	642	389	277	468	569	237	203	624	410	378	354	235
mRNA_D-dichotoma_M_contig1379.2794.1	1	0	0	0	0	0	1	0	0	0	0	0	6	1	0	22	6	35	2	1	1	5	1	50	19	8	2
mRNA_D-dichotoma_M_contig247.8471.1	131	87	73	1	0	0	199	104	178	204	74	90	293	505	1779	827	1073	166	1473	774	371	161	1746	496	680	684	437
mRNA_D-dichotoma_M_contig247.8473.1	12	8	6	0	0	0	33	7	11	17	3	4	2	8	15	3	4	2	8	14	0	0	0	3	0	0	0
mRNA_D-dichotoma_M_contig247.8480.1	85	43	49	0	0	0	82	38	45	76	35	38	422	501	942	690	776	320	711	544	259	269	779	462	552	446	380
mRNA_D-dichotoma_M_contig248.8509.1	34	7	6	7	0	1	47	18	6	25	1	4	0	5	0	2	5	25	63	24	1	9	23	53	12	37	5
mRNA_D-dichotoma_M_contig98.20452.1	2	0	1	0	0	0	6	1	1	1	2	2	0	7	0	6	0	3	14	10	2	2	20	20	6	14	18
mRNA_D-dichotoma_M_contig98.20457.1	6	24	1	0	0	0	13	2	7	20	10	6	232	302	273	121	148	128	804	1225	248	132	373	222	111	114	450
mRNA_D-dichotoma_M_contig98.20458.1	0	0	0	0	0	0	0	0	0	1	0	0	1	3	1	2	4	0	1	1	0	0	0	0	0	0	0
mRNA_D-dichotoma_M_contig98.20459.1	0	0	0	0	0	0	0	0	0	0	0	1	7	13	12	1	7	4	13	20	2	1	4	9	4	12	0
mRNA_D-dichotoma_M_contig98.20460.1	3	0	0	0	0	0	1	2	3	15	15	9	93	33	182	70	52	39	57	66	4	11	148	39	16	49	25
mRNA_D-dichotoma_M_contig98.20462.1	5	2	11	0	0	0	6	6	2	18	6	8	92	29	110	81	79	15	118	69	24	14	228	50	30	34	46
mRNA_D-dichotoma_M_contig99.20515.1	2	0	2	2	1	1	8	2	3	0	0	0	3	32	58	33	27	6	103	49	14	12	65	66	17	33	145
mRNA_D-dichotoma_M_contig99.20533.1	5	6	2	30	0	13	17	7	5	6	2	1	8	20	47	3	0	6	54	19	2	3	23	28	10	8	20
mRNA_D-dichotoma_M_contig202.6414.1	13	12	7	23	3	10	10	7	4	14	1	2	460	750	512	509	821	490	692	546	123	254	1312	779	781	512	238
mRNA_D-dichotoma_M_contig203.6463.1	8	3	3	17	4	4	10	1	3	12	8	2	7	50	10	35	56	22	14	9	15	12	42	35	40	12	16
mRNA_D-dichotoma_M_contig203.6474.1	0	0	0	0	0	0	3	0	0	0	1	0	25	74	40	54	129	27	11	10	1	10	7	186	40	12	1
mRNA_D-dichotoma_M_contig204.6510.1	56	21	19	61	10	19	19	5	13	16	8	3	571	1019	1697	2215	1141	1278	786	586	330	400	486	1327	1973	1180	698
mRNA_D-dichotoma_M_contig204.6515.1	6	1	6	16	1	18	10	6	8	17	7	9	25	22	79	13	25	47	82	41	28	6	186	107	59	54	50
mRNA_D-dichotoma_M_contig204.6519.1	0	0	0	53	14	35	0	0	0	0	0	3	4	0	16	10	0	4	40	26	7	5	17	9	1	20	28
mRNA_D-dichotoma_M_contig1402.2998.1	49	27	33	17	5	3	29	22	12	8	7	17	861	425	935	830	700	635	738	743	334	400	919	787	939	732	493
mRNA_D-dichotoma_M_contig1402.2999.1	43	12	23	19	8	12	18	29	19	11	4	3	1488	570	1709	1757	1325	924	1056	1147	565	697	1341	1095	1237	1341	996
mRNA_D-dichotoma_M_contig1403.3006.1	81	47	84	0	0	0	70	43	43	63	13	28	570	470	724	769	741	307	951	653	260	229	941	548	518	576	368
mRNA_D-dichotoma_M_contig1404.3010.1	18	1	5	1	0	2	31	3	7	14	2	0	47	59	64	65	43	89	194	172	67	33	179	134	67	70	33
mRNA_D-dichotoma_M_contig852.19316.1	94	62	56	2	0	1	110	46	52	85	20	30	743	947	1084	958	874	789	1178	821	558	659	782	938	923	875	665
mRNA_D-dichotoma_M_contig854.19329.1	10	4	11	0	0	0	1	6	7	8	0	4	64	223	138	217	216	204	184	219	138	209	222	177	157	229	190
mRNA_D-dichotoma_M_contig856.19336.1	0	0	0	0	0	0	0	0	0	1	0	0	0	6	6	8	0	0	0	0	0	0	0	30	10	0	2
mRNA_D-dichotoma_M_contig3179.10963.1	0	0	1	0	0	0	0	0	0	5	0	0	11	6	8	10	23	3	21	12	27	6	10	8	3	6	39
mRNA_D-dichotoma_M_contig3183.10976.1	0	0	0	37	2	15	1	0	0	6	1	3	20	24	37	48	32	19	86	153	4	11	41	40	33	39	19
mRNA_D-dichotoma_M_contig3184.10980.1	0	1	4	76	11	88	20	2	2	6	3	1	0	4	3	0	0	3	28	18	4	0	18	64	12	28	138
mRNA_D-dichotoma_M_contig3186.10985.1	13	4	4	243	24	37	26	8	2	17	8	5	329	208	452	681	393	221	217	169	213	218	276	225	221	363	427
mRNA_D-dichotoma_M_contig3188.10989.1	40	9	13	5	0	0	62	9	22	28	5	4	973	1389	839	814	813	472	816	644	237	235	1155	670	591	330	405
mRNA_D-dichotoma_M_contig3190.11003.1	9	1	4	0	0	1	2	1	0	10	0	5	0	1	6	5	10	2	12	6	9	1	15	18	15	5	8
mRNA_D-dichotoma_M_contig3190.11004.1	1	0	0	0	0	0	0	0	0	0	0	0	0	0	0	0	0	0	0	1	0	0	0	0	0	3	7
mRNA_D-dichotoma_M_contig3190.11005.1	0	0	0	0	0	0	0	0	0	0	0	0	0	0	0	0	0	0	0	0	1	0	0	1	1	0	0
mRNA_D-dichotoma_M_contig3193.11013.1	4	1	0	4	0	3	0	2	0	2	4	3	0	0	0	0	0	0	0	0	0	0	0	0	0	0	2
mRNA_D-dichotoma_M_contig4291.13849.1	0	0	0	0	0	0	3	0	0	11	0	0	0	18	15	14	0	2	6	5	5	3	26	4	9	2	0
mRNA_D-dichotoma_M_contig4295.13851.1	0	0	0	0	3	6	7	1	0	3	2	3	3	0	0	0	0	2	0	2	1	0	0	0	0	2	1
mRNA_D-dichotoma_M_contig4298.13855.1	1	0	0	5	8	3	0	0	0	0	0	0	0	0	0	0	0	0	1	0	0	0	0	0	0	0	0
mRNA_D-dichotoma_M_contig4298.13856.1	0	0	0	10	101	1	0	0	0	0	0	0	0	0	0	0	0	2	1	0	0	0	0	0	2	0	0
mRNA_D-dichotoma_M_contig4299.13859.1	0	0	3	0	0	0	2	0	0	0	0	0	0	0	0	0	0	0	0	0	0	0	17	0	0	0	0
mRNA_D-dichotoma_M_contig4308.13900.1	0	0	0	0	0	0	0	0	0	0	0	0	0	0	3	0	0	0	0	2	0	0	1	0	1	0	0
mRNA_D-dichotoma_M_contig4310.13916.1	0	0	0	0	0	0	0	0	0	0	0	0	0	0	0	12	5	0	0	0	0	0	0	0	0	4	0
mRNA_D-dichotoma_M_contig1895.5725.1	35	15	16	4	0	1	32	31	26	13	1	3	1566	898	4504	3651	1595	4903	10834	13400	567	1153	1760	3694	4701	937	588
mRNA_D-dichotoma_M_contig1896.5728.1	11	3	10	65	9	24	20	10	20	43	23	23	139	154	382	456	378	134	180	137	96	97	336	188	184	178	171
mRNA_D-dichotoma_M_contig1896.5729.1	31	27	15	0	0	0	86	32	43	69	41	20	101	252	215	200	150	104	216	116	105	115	274	214	193	188	118
mRNA_D-dichotoma_M_contig1898.5738.1	0	5	3	0	0	0	3	1	3	4	2	0	20	21	33	37	23	7	14	12	0	7	55	37	30	44	35
mRNA_D-dichotoma_M_contig1899.5740.1	2	1	0	0	0	0	7	1	0	1	1	0	18	10	2	2	0	6	3	3	14	30	11	3	5	1	24
mRNA_D-dichotoma_M_contig726.18141.1	3	0	0	12	1	0	2	0	0	2	0	0	1	0	0	0	0	0	0	2	0	0	0	2	0	0	0
mRNA_D-dichotoma_M_contig726.18142.1	0	0	0	0	0	0	0	0	0	0	0	0	0	0	0	0	0	0	0	0	0	0	0	0	0	0	0
mRNA_D-dichotoma_M_contig726.18146.1	0	0	0	0	0	0	0	0	0	0	0	2	0	0	1	0	0	0	0	0	0	0	0	6	2	0	0
mRNA_D-dichotoma_M_contig726.18147.1	18	20	7	6	0	0	21	3	10	9	2	2	0	6	30	32	18	3	24	18	3	7	3	70	30	97	14
mRNA_D-dichotoma_M_contig726.18148.1	0	0	0	0	0	0	0	0	0	0	0	0	4	4	2	8	6	2	1	0	9	0	4	1	1	4	1
mRNA_D-dichotoma_M_contig726.18153.1	86	7	16	0	0	0	65	8	11	13	0	1	128	186	1034	152	114	20	262	93	27	18	33	6	17	11	2
mRNA_D-dichotoma_M_contig726.18154.1	9	0	2	3	0	1	5	0	3	5	2	0	11	21	106	48	20	4	54	36	17	2	69	25	13	69	19
mRNA_D-dichotoma_M_contig728.18160.1	39	13	14	0	0	2	19	15	9	20	7	4	148	225	226	177	147	95	153	113	39	63	242	195	220	192	123
mRNA_D-dichotoma_M_contig728.18161.1	118	69	112	10337	4770	6592	84	93	114	269	166	118	2307	686	2197	1620	2019	1655	3330	3849	2789	2826	2464	1083	1041	2554	3552
mRNA_D-dichotoma_M_contig728.18162.1	17	11	18	2363	847	1125	28	24	63	59	57	41	313	77	282	137	150	231	467	480	114	134	371	85	73	229	329
mRNA_D-dichotoma_M_contig728.18163.1	27	22	28	2555	874	1383	33	48	57	47	56	38	501	100	461	132	245	193	484	609	170	100	387	101	49	166	176
mRNA_D-dichotoma_M_contig728.18164.1	6	5	7	119	35	31	11	2	4	14	1	0	15	20	35	61	33	29	79	78	26	11	40	54	23	21	76
mRNA_D-dichotoma_M_contig729.18169.1	0	0	1	0	0	0	0	0	0	0	0	0	0	0	0	1	0	0	0	0	0	0	0	0	0	0	0
mRNA_D-dichotoma_M_contig729.18170.1	23	13	14	0	0	0	32	19	15	166	41	48	307	347	264	238	444	126	306	214	222	183	292	187	179	197	157
mRNA_D-dichotoma_M_contig730.18182.1	0	1	1	1	5	0	2	0	0	90	27	39	1207	683	1412	1120	1322	927	860	974	742	796	895	616	839	895	1108
mRNA_D-dichotoma_M_contig730.18183.1	21	0	21	5	1	3	11	9	9	16	4	9	2159	592	806	2734	3109	809	789	848	1307	1852	2000	931	1068	3405	2296
mRNA_D-dichotoma_M_contig4229.13721.1	34	16	22	0	0	0	75	37	84	143	45	54	421	378	510	455	267	558	248	280	727	535	261	459	480	295	276
mRNA_D-dichotoma_M_contig4246.13749.1	2	0	0	0	0	0	1	0	0	1	0	0	0	0	1	0	0	0	0	2	0	1	1	5	4	0	0
mRNA_D-dichotoma_M_contig4248.13752.1	0	0	0	0	0	0	1	0	0	1	0	0	42	23	14	40	20	18	42	54	0	12	25	10	15	19	28
mRNA_D-dichotoma_M_contig4248.13753.1	5	0	0	3	0	0	18	0	0	44	0	0	150	679	484	372	214	211	510	418	59	93	385	439	232	196	171
mRNA_D-dichotoma_M_contig4251.13776.1	0	0	0	0	0	0	0	0	0	0	0	0	0	0	0	0	0	0	0	0	0	0	0	0	0	1	0
mRNA_D-dichotoma_M_contig4251.13778.1	1	0	1	7	13	11	12	1	7	1	0	0	9	28	25	43	12	14	21	19	1	0	16	31	23	10	18
mRNA_D-dichotoma_M_contig4252.13780.1	63	5	6	7	8	2	70	2	2	32	1	1	8	1	1	0	0	13	5	8	4	13	4	16	15	4	1
mRNA_D-dichotoma_M_contig4252.13781.1	35	10	19	0	0	0	22	14	7	8	6	1	207	205	1234	109	5	5	28	33	5	2	17	0	3	0	0
mRNA_D-dichotoma_M_contig1639.4439.1	54	14	50	3346	769	1510	26	37	23	38	17	15	747	345	635	618	422	477	504	444	405	466	643	496	338	468	1014
mRNA_D-dichotoma_M_contig1640.4456.1	0	0	0	65	2	15	0	0	0	0	0	0	0	0	0	4	0	0	0	0	0	0	1	10	0	10	9
mRNA_D-dichotoma_M_contig1641.4462.1	0	1	0	0	0	0	0	0	0	0	0	0	5	18	13	2	11	8	12	6	2	1	24	7	8	4	4
mRNA_D-dichotoma_M_contig1642.4464.1	7	0	8	0	0	0	12	1	1	5	2	2	235	381	375	234	135	220	331	351	42	34	642	496	364	123	102
mRNA_D-dichotoma_M_contig1642.4465.1	7	0	0	0	0	0	9	1	3	5	3	3	433	434	464	248	83	233	415	383	60	30	729	584	426	142	78
mRNA_D-dichotoma_M_contig1642.4466.1	23	6	12	1	0	0	59	14	9	28	6	7	345	490	514	842	443	352	538	611	324	158	986	551	485	473	310
mRNA_D-dichotoma_M_contig1642.4470.1	0	0	0	0	0	0	0	0	0	0	0	0	28	31	33	34	3	18	48	25	16	17	47	26	26	8	21
mRNA_D-dichotoma_M_contig2203.7355.1	18	6	5	0	0	0	17	11	16	28	7	14	1031	852	1700	3231	2518	963	926	1082	989	1039	2109	966	957	2245	1594
mRNA_D-dichotoma_M_contig2205.7363.1	1	0	0	0	0	0	2	0	0	2	0	0	7	7	6	8	1	5	23	10	1	1	3	2	3	0	5
mRNA_D-dichotoma_M_contig2205.7364.1	0	0	0	0	0	0	1	0	0	0	0	0	9	13	5	2	3	8	17	18	0	1	4	1	4	4	0
mRNA_D-dichotoma_M_contig2205.7367.1	0	0	0	1	0	0	3	0	0	2	0	0	8	23	9	25	47	10	12	22	3	5	33	23	25	33	6
mRNA_D-dichotoma_M_contig2206.7370.1	0	0	0	1	0	0	0	0	0	0	0	0	0	0	0	0	0	0	0	0	0	0	0	0	0	0	0
mRNA_D-dichotoma_M_contig2207.7374.1	127	78	108	16	0	1	100	95	69	144	47	71	1309	1254	2375	3315	2008	2298	2079	1958	1479	1297	1561	1879	1931	1792	880
mRNA_D-dichotoma_M_contig2208.7381.1	0	0	0	0	0	0	0	0	0	1	0	0	0	0	0	18	22	0	1	0	6	9	2	0	0	3	9
mRNA_D-dichotoma_M_contig2211.7394.1	12	3	8	80	35	42	5	6	4	7	6	2	124	76	42	22	26	111	20	26	22	73	116	64	245	55	25
mRNA_D-dichotoma_M_contig2211.7395.1	36	2	9	39	20	37	13	3	0	15	0	0	300	237	148	99	149	236	70	43	78	104	144	233	364	163	62
mRNA_D-dichotoma_M_contig1420.3090.1	0	0	0	1	3	0	0	0	0	0	0	0	0	0	0	2	0	1	9	10	0	0	4	1	2	0	2
mRNA_D-dichotoma_M_contig1421.3094.1	1	1	0	14	1	6	0	1	0	1	3	4	8	2	18	64	31	12	13	25	1	0	36	10	3	18	14
mRNA_D-dichotoma_M_contig1421.3095.1	1	1	3	15	8	11	2	2	3	3	2	7	14	11	37	98	37	17	41	45	10	11	39	7	10	28	31
mRNA_D-dichotoma_M_contig1421.3097.1	7	7	3	94	19	93	6	6	31	31	14	35	235	225	440	838	451	176	421	502	145	110	469	246	116	422	283
mRNA_D-dichotoma_M_contig1421.3101.1	9	10	4	38	21	31	3	2	16	14	7	10	156	274	246	536	238	161	347	407	131	198	331	288	186	341	387
mRNA_D-dichotoma_M_contig2193.7288.1	2	0	1	502	81	385	1	1	1	6	2	5	0	3	0	1	0	0	7	2	0	0	20	108	3	176	299
mRNA_D-dichotoma_M_contig2193.7289.1	19	7	2	71	11	53	7	8	12	6	6	0	620	541	615	905	819	245	511	371	194	247	657	540	536	838	344
mRNA_D-dichotoma_M_contig2194.7290.1	1	0	0	0	0	0	3	2	1	1	0	0	621	142	488	22	65	93	11	6	45	40	900	64	141	182	93
mRNA_D-dichotoma_M_contig2196.7295.1	24	12	16	12	14	10	92	36	33	105	48	34	427	393	885	959	799	396	744	682	315	289	845	550	409	840	515
mRNA_D-dichotoma_M_contig2197.7300.1	866	351	511	9	8	10	384	1357	683	610	204	443	30412	5346	13849	7652	6277	14819	7275	8855	8807	7747	18424	8945	10356	7015	12087
mRNA_D-dichotoma_M_contig2198.7302.1	0	0	0	0	1	1	0	0	0	0	0	0	2	1	0	1	0	0	2	2	1	0	8	99	33	17	6
mRNA_D-dichotoma_M_contig2199.7303.1	0	0	1	1	0	0	0	0	0	0	0	0	5	6	3	5	0	6	5	6	0	2	15	12	19	15	2
mRNA_D-dichotoma_M_contig2200.7340.1	3	1	1	14	0	11	15	1	3	10	5	2	140	384	223	209	377	162	195	115	145	165	811	329	284	245	230
mRNA_D-dichotoma_M_contig332.11402.1	14	0	4	4	0	0	12	6	10	6	2	4	221	221	271	156	64	76	244	138	43	51	306	238	118	152	150
mRNA_D-dichotoma_M_contig332.11403.1	12	5	4	20	6	7	5	4	8	12	2	2	50	65	122	121	92	68	118	56	23	30	181	73	77	85	93
mRNA_D-dichotoma_M_contig332.11407.1	0	0	0	0	0	0	0	0	0	0	0	0	0	0	0	0	0	0	0	0	0	0	0	0	0	0	0
mRNA_D-dichotoma_M_contig332.11408.1	0	0	0	0	0	0	0	0	0	0	0	0	0	0	0	0	0	0	0	0	0	0	0	0	0	0	2
mRNA_D-dichotoma_M_contig537.15944.1	0	1	0	0	0	0	0	0	0	1	0	2	0	12	15	1	0	3	6	5	0	0	0	2	1	0	0
mRNA_D-dichotoma_M_contig537.15948.1	5	1	5	0	0	1	5	8	3	4	4	1	43	52	98	99	35	104	94	101	43	46	82	78	118	84	19
mRNA_D-dichotoma_M_contig538.15958.1	0	0	0	13	1	4	0	0	0	1	0	0	0	0	0	0	0	2	4	0	0	0	0	41	5	16	78
mRNA_D-dichotoma_M_contig540.16016.1	0	0	0	0	0	0	1	0	0	0	0	0	1	0	0	0	0	0	0	0	0	0	0	0	0	0	0
mRNA_D-dichotoma_M_contig1578.4012.1	22	10	12	371	114	173	24	15	10	31	20	24	2171	689	1801	3726	2997	1275	2116	3398	895	906	2781	1336	1283	2400	1865
mRNA_D-dichotoma_M_contig1582.4038.1	30	2	6	5	2	3	30	2	4	22	1	5	17	81	135	91	85	41	106	52	23	16	91	108	60	81	142
mRNA_D-dichotoma_M_contig1583.4044.1	30	21	22	13	5	7	62	21	51	98	44	53	642	855	1288	1379	562	568	923	1142	475	386	1342	890	814	717	690
mRNA_D-dichotoma_M_contig1583.4046.1	3	7	5	0	0	0	12	3	3	7	1	5	4	1	4	15	3	3	33	29	11	3	21	22	3	5	14
mRNA_D-dichotoma_M_contig1583.4047.1	2	0	2	0	0	0	9	1	0	2	2	1	0	0	0	0	0	0	1	2	0	0	4	2	1	1	0
mRNA_D-dichotoma_M_contig1452.3319.1	0	0	2	0	0	2	0	2	1	2	1	0	121	24	211	75	56	18	250	152	79	53	270	73	52	66	86
mRNA_D-dichotoma_M_contig1454.3322.1	13	7	10	1	1	3	11	15	11	84	31	40	217	134	292	156	138	99	218	189	57	110	443	182	235	237	174
mRNA_D-dichotoma_M_contig1457.3345.1	54	16	31	32	0	30	25	30	24	18	11	11	522	479	1296	1147	969	883	794	672	637	533	1087	651	812	784	683
mRNA_D-dichotoma_M_contig4703.14689.1	2	3	0	0	0	0	3	0	0	1	0	0	1	3	2	0	1	0	2	1	0	0	0	1	0	0	0
mRNA_D-dichotoma_M_contig4703.14691.1	0	0	0	12	0	4	6	0	0	11	1	1	10	33	49	27	52	20	49	51	17	16	49	45	27	20	28
mRNA_D-dichotoma_M_contig4706.14693.1	0	0	0	0	0	0	0	0	0	0	0	0	1	0	2	0	0	0	0	4	0	0	7	2	2	0	1
mRNA_D-dichotoma_M_contig4708.14697.1	13	1	2	3	0	0	34	6	14	18	13	8	191	158	384	275	176	60	389	252	82	61	352	218	124	144	143
mRNA_D-dichotoma_M_contig4710.14711.1	0	0	0	0	0	0	0	0	0	1	0	0	0	0	0	3	0	0	0	0	0	0	0	0	0	1	2
mRNA_D-dichotoma_M_contig4714.14712.1	1	0	0	0	0	0	2	0	0	1	1	0	0	11	4	0	0	6	4	1	2	6	4	3	12	3	0
mRNA_D-dichotoma_M_contig4714.14713.1	1	0	1	1	5	2	1	0	0	2	1	0	13	24	22	25	11	8	37	19	28	21	36	76	30	32	95
mRNA_D-dichotoma_M_contig4725.14739.1	1	1	1	1	0	0	0	0	0	1	2	3	22	46	54	44	65	27	36	61	6	6	70	20	11	55	37
mRNA_D-dichotoma_M_contig4729.14744.1	0	0	0	0	0	0	0	0	0	2	0	0	2	4	1	0	0	0	0	0	0	0	3	3	0	2	0
mRNA_D-dichotoma_M_contig4740.14778.1	0	0	0	7	0	0	0	0	0	7	0	0	50	31	27	5	22	18	23	15	9	15	70	35	72	38	34
mRNA_D-dichotoma_M_contig678.17675.1	33	8	9	0	0	0	130	26	61	49	17	8	2	21	3	12	1	2	66	49	0	0	1	0	3	0	1
mRNA_D-dichotoma_M_contig678.17679.1	0	0	0	0	0	0	1	0	0	0	0	0	0	2	0	0	0	0	0	0	0	0	0	0	0	0	0
mRNA_D-dichotoma_M_contig680.17697.1	172	109	86	11	9	11	101	63	48	161	56	77	1346	1940	1869	2170	1751	2954	1731	1486	2282	2304	2002	1782	2858	1952	2568
mRNA_D-dichotoma_M_contig681.17700.1	7	8	3	0	0	1	15	12	15	52	32	31	754	212	548	685	511	309	190	359	594	353	468	219	125	349	632
mRNA_D-dichotoma_M_contig819.19007.1	1	0	1	8	1	4	1	0	0	1	1	3	23	9	17	13	8	23	139	94	5	4	104	15	11	19	37
mRNA_D-dichotoma_M_contig819.19008.1	13	11	10	34	9	38	16	18	31	34	21	29	251	67	151	174	84	205	1184	800	157	143	487	104	107	209	345
mRNA_D-dichotoma_M_contig820.19033.1	0	0	0	0	0	0	0	0	0	0	0	0	9	22	22	36	12	0	0	0	3	6	8	26	17	10	16
mRNA_D-dichotoma_M_contig1990.6210.1	0	0	0	0	0	0	0	1	1	0	0	0	0	0	0	0	0	0	0	0	0	0	0	0	0	0	0
mRNA_D-dichotoma_M_contig1992.6214.1	7	6	10	0	0	0	12	7	20	16	7	6	214	184	257	424	273	129	365	312	139	158	464	274	253	497	364
mRNA_D-dichotoma_M_contig1993.6215.1	10	0	3	8	1	4	5	0	1	7	1	3	25	11	58	65	64	40	58	55	20	15	83	45	48	60	40
mRNA_D-dichotoma_M_contig1997.6237.1	49	26	33	157	28	72	28	31	19	9	3	10	455	279	792	664	706	459	480	538	230	344	597	480	390	621	451
mRNA_D-dichotoma_M_contig1997.6238.1	0	0	0	1	0	0	3	0	0	0	0	0	20	48	49	37	25	32	60	44	14	14	63	38	33	34	14
mRNA_D-dichotoma_M_contig2649.9111.1	0	0	0	0	0	0	0	0	0	0	0	0	0	4	0	2	0	1	3	0	0	1	5	14	0	0	0
mRNA_D-dichotoma_M_contig2649.9112.1	0	0	0	0	0	0	3	0	0	2	0	0	182	194	291	97	38	89	249	264	29	23	159	228	128	104	67
mRNA_D-dichotoma_M_contig2653.9143.1	0	0	0	0	0	0	0	0	0	0	0	0	2	31	13	13	6	1	1	4	1	2	19	8	9	4	12
mRNA_D-dichotoma_M_contig2653.9144.1	0	0	1	0	0	0	0	0	0	0	0	0	1	0	0	16	0	0	0	0	2	7	0	0	1	5	2
mRNA_D-dichotoma_M_contig2659.9155.1	0	0	0	0	0	0	0	0	0	0	0	0	2	5	7	7	11	5	0	0	1	4	5	2	2	4	2
mRNA_D-dichotoma_M_contig4199.13622.1	0	0	0	0	0	0	0	0	0	0	0	0	3	4	2	0	0	0	2	2	0	0	5	2	2	1	0
mRNA_D-dichotoma_M_contig4201.13667.1	0	0	0	0	0	0	1	0	0	1	0	0	88	52	54	51	38	18	102	77	1	16	86	53	73	73	17
mRNA_D-dichotoma_M_contig4204.13672.1	0	0	0	0	0	0	0	0	0	0	0	0	0	0	0	0	0	0	0	0	0	0	0	0	0	0	0
mRNA_D-dichotoma_M_contig4213.13689.1	2	2	1	3	0	0	2	1	3	2	0	0	8	1	8	7	0	0	10	8	1	7	17	14	23	20	3
mRNA_D-dichotoma_M_contig4218.13695.1	3	0	1	0	0	0	2	2	2	7	1	0	80	99	192	72	74	94	106	120	20	34	99	121	115	100	18
mRNA_D-dichotoma_M_contig261.9008.1	2	0	1	6	0	2	0	0	0	6	1	0	7451	943	10231	4393	2994	2194	9701	13428	467	1725	5750	4814	2520	4516	2887
mRNA_D-dichotoma_M_contig262.9036.1	8	2	3	2	1	0	10	0	4	9	3	3	316	252	383	331	319	168	272	230	96	116	378	220	217	260	199
mRNA_D-dichotoma_M_contig263.9056.1	20	9	10	0	0	0	9	20	14	3	1	6	0	1	2	1	0	1	7	3	0	4	20	3	9	1	3
mRNA_D-dichotoma_M_contig2716.9386.1	1	0	0	0	0	0	1	0	0	7	2	4	71	80	33	29	31	114	86	64	229	183	48	57	66	38	149
mRNA_D-dichotoma_M_contig2716.9385.1	0	0	0	0	0	0	19	0	1	8	0	0	21	46	17	9	5	24	79	86	94	3	60	36	34	11	17
mRNA_D-dichotoma_M_contig2717.9387.1	36	0	0	19	0	0	44	0	0	43	0	0	0	0	0	0	0	0	12	8	0	0	0	1	0	0	0
mRNA_D-dichotoma_M_contig2717.9390.1	0	0	0	7	3	6	0	1	0	1	0	0	0	0	0	0	0	0	0	2	0	0	0	0	0	0	0
mRNA_D-dichotoma_M_contig2722.9403.1	0	0	0	0	0	0	0	0	0	0	0	0	0	2	1	8	10	3	8	5	2	2	3	7	9	6	3
mRNA_D-dichotoma_M_contig2722.9404.1	0	0	0	0	0	0	0	0	0	0	0	0	4	18	2	16	70	13	8	18	1	0	20	10	15	3	4
mRNA_D-dichotoma_M_contig2724.9417.1	9	0	0	1	3	1	3	0	0	11	1	1	5	29	27	21	18	24	36	19	9	13	54	18	14	25	12
mRNA_D-dichotoma_M_contig2725.9419.1	0	0	0	6	2	1	2	1	0	0	0	0	0	0	0	0	0	0	2	0	0	0	0	0	1	9	49
mRNA_D-dichotoma_M_contig161.4268.1	47	28	52	2360	582	1552	86	37	39	160	58	69	2578	1604	2996	3038	2162	1840	2225	2668	1455	1638	2343	2237	1964	2374	2478
mRNA_D-dichotoma_M_contig162.4330.1	80	53	54	3	2	10	99	60	121	184	80	93	1612	745	1281	1552	782	791	1441	1417	508	241	2194	907	505	878	623
mRNA_D-dichotoma_M_contig162.4332.1	0	0	0	20	0	17	0	0	1	0	0	0	5	0	0	0	0	0	0	0	1	0	4	0	0	0	0
mRNA_D-dichotoma_M_contig163.4393.1	0	0	0	0	0	0	1	0	0	4	0	0	49	42	107	28	19	37	67	33	19	6	94	32	23	19	11
mRNA_D-dichotoma_M_contig163.4394.1	364	313	228	4	0	1	318	174	204	637	245	290	1071	1742	2100	1902	1661	637	2128	1336	888	616	2125	1173	1046	1076	643
mRNA_D-dichotoma_M_contig163.4404.1	0	0	0	0	0	0	0	0	0	0	0	0	0	0	0	0	0	0	0	1	1	0	0	2	1	0	1
mRNA_D-dichotoma_M_contig1764.5092.1	0	0	0	0	1	0	0	0	0	0	0	0	1	0	0	1	0	0	0	0	2	0	0	0	0	0	0
mRNA_D-dichotoma_M_contig1765.5096.1	1	2	0	1	0	0	0	0	0	7	0	5	29	25	49	40	0	80	98	59	31	23	47	56	46	20	19
mRNA_D-dichotoma_M_contig1766.5101.1	1	0	1	0	0	0	0	0	0	1	1	0	0	3	2	1	0	1	4	0	0	0	14	0	1	0	2
mRNA_D-dichotoma_M_contig1767.5102.1	0	0	0	0	0	0	0	0	0	0	0	1	16	33	25	45	41	10	7	6	7	5	40	99	91	50	38
mRNA_D-dichotoma_M_contig129.2207.1	0	0	0	0	0	0	2	0	0	0	0	0	0	12	6	4	0	2	7	2	1	0	3	7	1	7	3
mRNA_D-dichotoma_M_contig129.2208.1	0	0	0	7	0	0	2	0	0	0	0	0	57	122	76	104	23	69	97	48	49	40	68	84	45	30	45
mRNA_D-dichotoma_M_contig129.2209.1	0	0	0	2	0	0	0	0	0	0	0	0	0	2	5	1	1	0	21	12	0	0	2	1	2	0	0
mRNA_D-dichotoma_M_contig129.2212.1	0	0	0	0	0	0	3	0	0	0	1	0	0	7	25	33	19	22	54	28	15	5	32	13	23	16	20
mRNA_D-dichotoma_M_contig1043.450.1	1	0	0	2	0	0	1	0	0	0	1	0	20	45	19	48	39	42	13	14	80	73	17	23	33	63	33
mRNA_D-dichotoma_M_contig1045.464.1	0	0	0	0	0	0	0	0	0	0	0	0	0	1	0	0	0	0	0	0	0	0	0	0	0	0	0
mRNA_D-dichotoma_M_contig1048.474.1	3	1	1	0	0	0	3	5	4	6	0	1	0	7	1	7	1	2	7	3	8	4	10	3	0	4	1
mRNA_D-dichotoma_M_contig1048.476.1	0	0	0	0	0	1	0	0	0	0	1	0	1	0	0	0	0	1	3	1	0	2	1	0	0	0	1
mRNA_D-dichotoma_M_contig943.20157.1	0	0	0	0	0	0	0	0	0	0	0	0	1	1	1	0	0	2	1	1	1	0	0	0	0	1	1
mRNA_D-dichotoma_M_contig944.20165.1	10	4	8	9343	1736	4407	26	9	7	3	0	1	0	0	7	0	0	4	12	10	0	1	54	47	0	518	53
mRNA_D-dichotoma_M_contig945.20172.1	6	0	5	14	9	5	7	1	6	12	2	4	6	12	102	8	35	10	80	28	23	11	282	15	46	34	36
mRNA_D-dichotoma_M_contig945.20176.1	0	0	0	0	0	0	0	0	0	0	0	0	0	0	0	0	0	0	0	0	1	0	0	0	0	0	0
mRNA_D-dichotoma_M_contig946.20177.1	0	0	0	0	0	0	0	0	0	0	0	0	1	0	0	3	0	0	0	1	2	0	0	0	0	0	4
mRNA_D-dichotoma_M_contig946.20178.1	2	0	0	0	0	0	12	0	0	8	0	0	61	234	103	94	23	81	142	98	15	21	144	156	62	65	41
mRNA_D-dichotoma_M_contig781.18648.1	0	4	0	2	1	1	3	0	0	2	2	0	17	41	26	19	47	8	20	4	3	2	12	21	7	24	48
mRNA_D-dichotoma_M_contig781.18654.1	0	0	0	0	0	0	0	0	0	0	0	0	0	2	1	6	0	2	0	3	1	4	0	9	7	8	5
mRNA_D-dichotoma_M_contig784.18674.1	12	5	10	40	12	17	45	15	32	81	46	63	1974	865	1771	2655	1873	783	1788	2444	671	619	3088	1287	937	1922	1873
mRNA_D-dichotoma_M_contig785.18679.1	4	0	4	13	2	4	9	1	1	17	3	1	206	218	139	464	110	85	246	292	75	47	317	722	299	262	150
mRNA_D-dichotoma_M_contig471.14709.1	1	0	0	5	0	0	4	0	0	2	0	0	75	36	35	17	4	4	30	21	6	15	86	119	114	18	17
mRNA_D-dichotoma_M_contig472.14728.1	0	1	0	5	1	0	2	0	1	1	3	1	9	17	53	73	45	41	42	49	14	9	74	27	30	37	25
mRNA_D-dichotoma_M_contig472.14729.1	4	0	0	15	4	7	6	0	0	1	0	0	32	68	66	72	44	23	57	22	9	12	113	97	50	90	70
mRNA_D-dichotoma_M_contig473.14748.1	3	3	1	0	0	0	5	1	0	6	0	2	0	5	6	3	7	2	14	3	7	7	21	41	5	8	40
mRNA_D-dichotoma_M_contig473.14755.1	0	0	1	5	1	3	3	0	2	1	0	1	0	2	0	0	0	0	2	0	0	0	0	4	0	7	18
mRNA_D-dichotoma_M_contig473.14759.1	133	63	95	0	0	0	139	56	47	148	39	52	97	165	592	215	160	41	398	312	66	44	91	61	90	55	37
mRNA_D-dichotoma_M_contig473.14760.1	12	1	15	0	0	0	7	9	6	12	7	4	20	27	130	67	33	5	63	41	5	1	30	2	12	14	12
mRNA_D-dichotoma_M_contig1255.1986.1	1	0	0	0	0	0	0	0	0	1	0	0	8	31	11	14	13	13	6	9	1	6	24	14	8	8	8
mRNA_D-dichotoma_M_contig1255.1988.1	37	6	10	124	11	40	20	6	13	13	3	10	439	81	621	193	110	170	136	136	72	52	298	168	144	103	124
mRNA_D-dichotoma_M_contig1255.1990.1	14	5	12	8	1	9	20	8	10	12	2	4	10	17	63	3	0	1	39	4	0	0	22	68	15	42	160
mRNA_D-dichotoma_M_contig1255.1996.1	15	1	3	20	2	10	31	10	8	22	11	2	30	11	21	44	13	16	46	28	15	19	209	243	143	258	226
mRNA_D-dichotoma_M_contig1257.2006.1	19	19	10	1	0	0	32	10	16	37	10	20	0	33	23	36	23	20	23	17	3	19	30	25	20	23	8
mRNA_D-dichotoma_M_contig1258.2008.1	5	0	1	0	0	0	5	1	1	4	5	1	86	324	83	176	59	115	238	259	148	49	199	139	283	73	25
mRNA_D-dichotoma_M_contig1258.2013.1	80	45	45	0	0	0	120	71	61	212	48	65	235	177	101	174	147	340	228	231	570	832	423	80	128	88	1537
mRNA_D-dichotoma_M_contig380.12636.1	1	0	1	0	0	0	1	0	0	0	0	0	0	0	2	0	0	2	2	3	1	0	3	5	1	2	0
mRNA_D-dichotoma_M_contig380.12643.1	1	0	0	0	0	0	0	0	0	1	0	0	8	3	4	8	5	13	7	7	4	4	5	8	6	5	0
mRNA_D-dichotoma_M_contig634.17279.1	0	0	0	0	0	0	0	0	0	0	0	0	115	326	172	124	190	129	206	116	80	86	155	211	213	89	49
mRNA_D-dichotoma_M_contig219.7278.1	0	0	0	0	0	0	0	0	0	0	0	1	0	0	0	0	0	0	3	0	0	0	0	0	2	0	0
mRNA_D-dichotoma_M_contig220.7335.1	0	0	0	0	0	0	0	0	0	2	0	1	1	29	39	12	24	0	0	1	0	0	11	340	254	68	21
mRNA_D-dichotoma_M_contig220.7337.1	0	0	0	1	0	0	0	0	0	0	1	0	4	0	2	0	0	0	0	0	0	0	89	47	30	30	45
mRNA_D-dichotoma_M_contig220.7339.1	0	0	0	0	0	0	0	0	0	0	0	0	2	28	13	58	101	10	3	6	4	7	16	65	18	39	7
mRNA_D-dichotoma_M_contig892.19688.1	22	34	26	4	5	0	41	37	24	89	38	22	1764	1003	1617	1626	887	1712	1426	1305	748	1604	1056	1270	639	877	2513
mRNA_D-dichotoma_M_contig892.19689.1	0	0	0	0	0	0	0	0	0	2	0	0	0	1	0	0	0	2	1	0	0	0	10	4	4	0	2
mRNA_D-dichotoma_M_contig892.19690.1	0	0	0	0	0	0	0	0	0	0	0	0	6	0	3	1	0	1	1	4	0	0	9	16	2	4	0
mRNA_D-dichotoma_M_contig893.19696.1	19	1	12	0	0	0	38	4	3	15	4	5	0	4	6	21	0	7	3	4	3	2	0	4	4	3	2
mRNA_D-dichotoma_M_contig894.19699.1	0	0	0	0	0	0	0	0	0	0	0	0	0	0	0	14	19	0	0	0	0	5	0	0	0	4	2
mRNA_D-dichotoma_M_contig1460.3361.1	123	59	85	4	0	0	141	87	136	170	50	68	818	766	1957	1341	867	335	1251	957	602	392	1169	659	540	507	997
mRNA_D-dichotoma_M_contig1463.3372.1	11	3	7	2	0	3	8	2	7	12	6	6	208	108	264	314	300	127	239	234	58	50	312	150	153	183	156
mRNA_D-dichotoma_M_contig1473.3411.1	38	47	28	0	0	1	101	23	11	92	23	10	7	40	32	18	15	13	37	12	22	5	51	11	10	5	9
mRNA_D-dichotoma_M_contig149.3502.1	38	13	28	69	16	16	19	11	14	11	5	8	2177	421	1888	1039	956	814	1179	968	175	216	1679	886	896	327	421
mRNA_D-dichotoma_M_contig149.3508.1	1	0	0	1	0	3	1	0	0	1	0	0	77	72	57	43	25	16	53	53	13	16	118	156	77	81	44
mRNA_D-dichotoma_M_contig149.3515.1	47	32	32	1	0	4	140	36	44	154	67	78	685	1210	1598	1139	944	481	1123	1450	576	372	880	1465	984	784	839
mRNA_D-dichotoma_M_contig149.3516.1	9	1	0	1	0	0	10	6	2	21	11	12	33	143	217	225	215	71	123	172	49	63	128	151	72	128	141
mRNA_D-dichotoma_M_contig149.3517.1	0	0	0	0	0	0	0	0	0	0	0	0	0	0	0	0	0	0	1	0	0	0	10	2	3	2	1
mRNA_D-dichotoma_M_contig150.3591.1	0	0	0	1	0	0	0	0	0	0	0	0	23	21	49	12	21	16	58	53	3	23	81	40	28	44	20
mRNA_D-dichotoma_M_contig150.3593.1	0	2	3	13	1	15	1	4	6	7	8	9	68	75	147	312	217	62	94	146	40	25	116	70	21	156	101
mRNA_D-dichotoma_M_contig150.3600.1	94	63	99	9	1	1	86	63	89	58	36	40	1027	978	2094	2218	1955	1157	2160	2054	333	490	2118	1574	1070	1806	981
mRNA_D-dichotoma_M_contig2756.9502.1	0	1	0	1	0	0	9	2	3	4	2	5	847	687	640	597	238	741	722	572	475	277	596	765	679	347	619
mRNA_D-dichotoma_M_contig2757.9504.1	3	0	0	0	0	0	2	2	1	15	2	3	17	48	22	17	9	3	16	38	2	1	92	1	16	5	9
mRNA_D-dichotoma_M_contig2760.9518.1	123	81	60	0	0	0	81	51	45	42	19	19	1148	2362	1955	2573	1679	2468	3167	2412	1672	1609	1608	2808	3891	2622	1500
mRNA_D-dichotoma_M_contig2761.9519.1	4	1	10	0	0	1	1	1	2	6	2	0	332	145	590	401	296	209	362	418	22	35	242	199	158	171	99
mRNA_D-dichotoma_M_contig2763.9521.1	190	93	154	1	1	1	153	101	78	121	48	94	9734	4977	9713	13419	9686	7308	7420	6218	8157	7516	8428	6986	9069	9754	7789
mRNA_D-dichotoma_M_contig2763.9522.1	100	1	12	4	0	0	134	4	0	106	6	2	0	0	0	0	0	0	0	0	0	1	0	1	0	2	0
mRNA_D-dichotoma_M_contig2764.9524.1	0	0	0	1	0	0	1	0	0	0	0	0	24	24	6	20	47	27	27	28	21	28	87	31	17	32	36
mRNA_D-dichotoma_M_contig2765.9525.1	0	0	0	2	0	0	1	0	0	3	0	1	24	13	50	11	4	10	11	8	4	1	221	86	59	21	23
mRNA_D-dichotoma_M_contig2766.9530.1	34	14	25	4	1	1	14	27	20	14	2	1	241	287	381	223	490	173	288	289	56	54	362	256	190	175	77
mRNA_D-dichotoma_M_contig2768.9534.1	7	9	4	0	0	0	6	5	7	17	3	2	13	21	85	33	36	8	20	19	6	4	38	3	35	35	21
mRNA_D-dichotoma_M_contig95.20214.1	3	0	7	0	0	0	31	1	1	5	4	0	65	462	692	430	507	100	375	200	44	39	191	400	252	183	139
mRNA_D-dichotoma_M_contig95.20222.1	1	3	2	0	0	1	3	3	5	3	6	4	100	94	265	293	232	71	168	208	86	43	180	87	47	161	116
mRNA_D-dichotoma_M_contig96.20298.1	45	25	24	0	0	0	99	38	50	120	53	68	2068	2123	2237	3755	2952	2021	2889	3470	1950	2414	2474	3192	2494	3475	2516
mRNA_D-dichotoma_M_contig96.20316.1	63	42	51	14	9	3	120	64	75	220	84	87	230	189	785	327	187	71	204	116	89	56	981	291	237	283	247
mRNA_D-dichotoma_M_contig97.20381.1	35	30	45	0	0	0	90	42	50	118	46	48	906	758	1020	1347	885	580	1151	968	238	259	1718	1190	1225	1356	461
mRNA_D-dichotoma_M_contig97.20388.1	3	7	6	124	16	42	8	7	5	7	1	6	586	106	503	273	278	206	269	322	20	40	666	307	174	129	115
mRNA_D-dichotoma_M_contig97.20389.1	16	11	13	131	22	68	12	9	18	27	10	12	185	118	252	586	440	159	191	276	85	90	344	184	90	362	374
mRNA_D-dichotoma_M_contig3230.11154.1	1	0	0	0	0	0	1	0	0	0	3	0	24	3	0	1	0	5	0	3	1	0	38	12	13	7	1
mRNA_D-dichotoma_M_contig3234.11164.1	45	40	22	0	0	0	46	46	51	48	19	27	240	522	553	449	276	294	454	448	219	184	852	468	512	342	286
mRNA_D-dichotoma_M_contig3240.11184.1	0	0	0	0	0	0	0	0	0	0	0	0	0	0	0	0	0	0	0	0	0	0	0	0	0	0	0
mRNA_D-dichotoma_M_contig3245.11190.1	0	0	0	23	5	15	1	1	0	0	0	0	0	0	3	0	0	0	0	0	0	0	0	1	0	2	14
mRNA_D-dichotoma_M_contig3245.11192.1	4	0	0	76	26	66	4	2	3	2	0	0	8	12	0	2	0	8	16	3	7	8	7	43	16	73	101
mRNA_D-dichotoma_M_contig1806.5329.1	0	1	0	0	0	0	0	2	0	0	0	0	0	0	0	5	0	0	0	0	7	0	0	0	0	0	5
mRNA_D-dichotoma_M_contig1807.5336.1	2	1	3	0	0	0	0	1	2	0	0	0	0	0	0	102	14	0	1	0	55	34	3	0	1	18	45
mRNA_D-dichotoma_M_contig1810.5362.1	19	10	12	0	1	0	20	12	10	18	4	10	406	455	652	231	126	321	635	410	67	96	558	412	552	232	68
mRNA_D-dichotoma_M_contig969.20376.1	0	0	0	0	0	0	0	0	0	0	0	0	0	0	0	0	0	0	0	0	0	0	0	0	0	0	0
mRNA_D-dichotoma_M_contig970.20401.1	15	3	11	2	4	3	19	12	16	67	40	59	1851	992	2636	3350	3007	1261	2107	2406	637	770	2419	1720	1251	2695	1458
mRNA_D-dichotoma_M_contig973.20421.1	105	44	56	8410	1776	4272	176	87	119	668	357	354	7075	4158	6078	12872	7620	5160	6744	7212	5290	5082	8312	5353	4027	9026	10859
mRNA_D-dichotoma_M_contig973.20425.1	0	0	0	0	0	0	4	0	2	3	0	1	17	12	43	9	71	5	150	42	4	6	25	14	9	5	3
mRNA_D-dichotoma_M_contig467.14621.1	5	2	1	0	0	0	7	3	4	2	1	2	7	36	33	67	23	20	0	1	0	15	9	42	22	30	14
mRNA_D-dichotoma_M_contig468.14637.1	0	0	0	4	0	0	1	0	0	0	0	0	1	8	7	7	0	1	5	2	0	3	7	17	2	9	43
mRNA_D-dichotoma_M_contig468.14638.1	2	1	0	1	1	1	1	0	0	3	0	2	1	6	3	9	2	1	6	4	0	1	8	21	5	13	26
mRNA_D-dichotoma_M_contig469.14653.1	15	11	7	2	1	2	39	7	14	27	6	17	26	102	25	75	59	58	78	45	48	46	120	62	55	71	53
mRNA_D-dichotoma_M_contig469.14654.1	8	6	1	0	1	3	10	11	9	7	4	5	18	50	30	70	90	27	36	53	19	34	54	42	22	68	35
mRNA_D-dichotoma_M_contig110.874.1	27	8	20	272	34	115	10	14	17	25	11	12	578	449	969	2348	1355	742	1005	1112	876	733	948	842	574	1476	871
mRNA_D-dichotoma_M_contig110.882.1	31	15	16	3	0	1	36	18	14	21	6	11	1364	1174	2544	1493	784	424	1625	922	596	412	1846	1435	997	1010	1098
mRNA_D-dichotoma_M_contig110.885.1	1	0	0	12	2	8	1	1	0	5	2	2	0	5	2	2	0	2	2	1	1	0	1	0	3	0	5
mRNA_D-dichotoma_M_contig110.886.1	99	41	64	69	14	53	69	66	85	367	201	194	6894	2987	8541	7861	7307	4327	4467	5774	8075	5117	4337	4461	2350	4843	4635
mRNA_D-dichotoma_M_contig111.948.1	0	0	0	0	0	0	0	0	0	0	0	0	0	0	3	1	0	0	0	0	0	0	1	0	0	0	0
mRNA_D-dichotoma_M_contig152.3689.1	11	8	8	0	0	0	4	5	10	7	5	3	272	103	244	183	140	131	203	194	47	93	198	189	162	135	96
mRNA_D-dichotoma_M_contig152.3690.1	13	1	14	1	0	0	3	5	4	15	3	1	311	209	438	595	430	245	308	307	161	239	325	292	276	342	408
mRNA_D-dichotoma_M_contig153.3763.1	1	0	0	0	0	0	4	0	1	1	0	1	96	242	241	169	55	33	130	107	9	8	68	102	45	59	19
mRNA_D-dichotoma_M_contig4497.14257.1	11	0	6	0	0	0	5	9	6	10	3	2	1	0	0	0	0	3	16	8	0	0	12	12	17	8	10
mRNA_D-dichotoma_M_contig4501.14307.1	1	0	0	2	2	0	3	0	0	3	2	0	53	81	52	77	30	29	42	37	27	16	66	51	48	31	25
mRNA_D-dichotoma_M_contig4501.14308.1	0	0	0	12	0	0	2	0	0	1	0	0	4	22	19	8	9	3	30	4	3	1	17	13	6	5	3
mRNA_D-dichotoma_M_contig4502.14309.1	0	0	0	0	1	0	0	0	0	0	0	0	23	42	18	10	14	26	17	21	1	3	37	45	33	24	4
mRNA_D-dichotoma_M_contig4508.14312.1	0	0	0	0	0	0	0	0	0	0	0	0	1	0	0	0	0	0	0	0	0	0	0	0	0	0	0
mRNA_D-dichotoma_M_contig4511.14335.1	121	3	3	3989	62	172	105	5	2	102	4	3	203	461	501	210	287	314	496	314	147	215	642	302	560	315	219
mRNA_D-dichotoma_M_contig4513.14337.1	7	11	8	0	0	0	37	6	7	39	6	8	1	8	4	11	7	0	4	3	9	0	1	0	0	0	0
mRNA_D-dichotoma_M_contig398.13054.1	0	0	0	0	0	0	0	0	0	0	0	0	0	0	0	0	0	0	0	0	0	0	0	0	0	0	0
mRNA_D-dichotoma_M_contig398.13061.1	0	0	0	0	0	0	0	0	0	0	0	0	0	4	0	2	0	0	0	1	0	0	0	0	0	0	1
mRNA_D-dichotoma_M_contig400.13169.1	156	59	117	5	1	3	123	65	91	18	12	21	14474	7929	14269	15873	12196	6769	13845	13281	1368	3292	11330	9008	8174	8528	6055
mRNA_D-dichotoma_M_contig169.4701.1	33	29	13	0	0	0	83	38	26	58	14	25	3492	2148	2208	3273	1955	1946	2252	2486	2138	2659	2236	1958	2619	2245	3046
mRNA_D-dichotoma_M_contig169.4705.1	21	8	6	0	1	0	5	8	6	15	2	12	1015	346	1052	923	813	552	791	628	201	332	1005	515	733	606	451
mRNA_D-dichotoma_M_contig169.4709.1	0	0	1	0	0	0	0	2	1	0	0	0	11	18	20	52	18	19	53	44	17	10	38	14	21	23	34
mRNA_D-dichotoma_M_contig170.4782.1	0	0	0	0	0	0	0	0	0	1	0	0	0	0	0	0	0	0	0	0	0	0	0	0	0	0	0
mRNA_D-dichotoma_M_contig324.11177.1	0	0	0	0	1	0	0	0	0	0	0	0	1	42	13	18	24	3	32	36	11	7	30	36	29	19	13
mRNA_D-dichotoma_M_contig326.11215.1	28	25	28	0	0	0	68	13	20	65	29	21	571	304	1160	593	660	153	509	433	180	104	973	291	222	389	237
mRNA_D-dichotoma_M_contig326.11220.1	16	19	15	56	29	25	38	12	21	34	19	14	348	243	417	672	491	275	405	400	287	170	532	289	261	421	309
mRNA_D-dichotoma_M_contig1001.109.1	0	0	0	0	0	0	0	0	0	0	0	0	7	3	2	1	0	0	0	0	0	0	19	4	5	1	0
mRNA_D-dichotoma_M_contig1005.135.1	1	1	7	1	0	0	4	7	12	13	1	3	246	141	304	313	315	265	340	317	271	322	379	217	203	325	413
mRNA_D-dichotoma_M_contig1187.1491.1	2	0	0	1	0	0	6	0	1	4	1	0	14	9	9	10	10	30	35	35	4	6	11	6	5	2	3
mRNA_D-dichotoma_M_contig1190.1540.1	5	6	15	22	6	11	7	12	27	50	31	48	153	106	636	170	454	117	942	1007	155	123	839	175	56	175	380
mRNA_D-dichotoma_M_contig1190.1541.1	23	2	9	9	6	9	20	14	20	47	30	40	189	107	620	188	548	146	1205	1029	188	150	998	209	89	195	514
mRNA_D-dichotoma_M_contig216.7158.1	0	0	0	4	0	0	1	0	0	2	0	0	3	3	14	3	0	5	0	0	1	0	1	21	18	2	1
mRNA_D-dichotoma_M_contig217.7188.1	0	0	0	0	0	0	0	0	0	0	0	0	0	17	6	10	7	7	13	8	0	0	21	9	11	0	0
mRNA_D-dichotoma_M_contig217.7191.1	49	28	39	117	83	67	49	28	40	52	30	29	1080	467	1433	1926	788	423	828	837	202	217	976	687	411	639	455
mRNA_D-dichotoma_M_contig218.7233.1	0	0	0	0	0	0	0	0	0	0	0	0	0	0	0	0	0	0	0	0	0	0	0	0	0	0	0
mRNA_D-dichotoma_M_contig218.7236.1	9	7	2	1	0	0	15	3	1	6	1	2	32	31	103	34	47	12	58	35	8	1	39	28	39	25	52
mRNA_D-dichotoma_M_contig218.7239.1	2	4	1	8	1	1	1	0	0	3	1	0	12	51	16	27	11	29	26	43	12	16	46	54	34	27	45
mRNA_D-dichotoma_M_contig218.7242.1	48	5	16	0	1	0	66	7	7	25	6	5	1916	1476	1318	974	1055	3580	1062	621	3111	2567	648	4293	6742	2824	932
mRNA_D-dichotoma_M_contig3774.12563.1	20	7	1	0	0	0	5	1	0	1	0	0	61	8	11	2	20	46	2	9	50	25	6	4	4	3	19
mRNA_D-dichotoma_M_contig3781.12580.1	8	17	9	0	0	0	6	8	7	7	4	5	287	130	112	362	333	189	268	240	303	191	379	168	301	337	294
mRNA_D-dichotoma_M_contig3782.12582.1	3	0	1	10	7	5	3	1	0	21	4	6	0	3	3	2	20	0	11	7	0	0	4	0	0	0	5
mRNA_D-dichotoma_M_contig3786.12594.1	0	0	0	245	37	103	3	0	1	0	0	0	0	1	1	0	0	0	1	0	0	0	2	21	0	30	72
mRNA_D-dichotoma_M_contig72.18099.1	17	26	17	20	23	19	20	14	16	124	54	62	1610	704	1178	932	1149	926	1211	1150	2374	2033	2278	1081	896	1722	3361
mRNA_D-dichotoma_M_contig72.18100.1	39	50	44	75	48	59	70	48	92	442	283	310	5143	1185	4597	3352	4191	2242	2631	3255	9113	5040	6051	2527	1680	5064	10465
mRNA_D-dichotoma_M_contig73.18175.1	114	67	31	7	2	1	242	58	51	253	21	37	14	74	75	30	5	11	58	40	33	12	54	85	76	88	46
mRNA_D-dichotoma_M_contig73.18176.1	0	0	0	1	0	0	0	0	0	0	0	0	0	0	0	0	0	0	0	0	0	0	0	0	0	0	0
mRNA_D-dichotoma_M_contig73.18178.1	1	0	0	0	1	0	1	0	0	0	0	0	4	3	1	0	0	1	3	1	0	0	0	1	4	0	0
mRNA_D-dichotoma_M_contig1105.925.1	13	10	11	1	0	0	12	4	11	6	6	4	203	199	168	500	329	293	242	242	550	565	200	267	352	452	391
mRNA_D-dichotoma_M_contig1109.938.1	0	0	0	3	0	1	2	1	0	0	1	1	23	12	25	9	7	6	23	19	6	1	20	4	19	3	8
mRNA_D-dichotoma_M_contig4990.15242.1	38	23	19	0	0	0	57	14	17	62	14	17	136	78	184	91	101	159	238	220	49	55	110	127	140	70	27
mRNA_D-dichotoma_M_contig4994.15243.1	0	0	0	0	0	0	0	0	0	0	0	0	0	0	0	1	0	0	0	1	0	0	1	0	0	0	2
mRNA_D-dichotoma_M_contig4994.15244.1	1	0	0	1	0	0	1	0	0	1	0	0	62	119	86	115	46	71	108	106	11	49	74	89	74	94	37
mRNA_D-dichotoma_M_contig4998.15245.1	0	0	0	0	0	0	0	0	0	0	0	0	1	2	4	1	7	1	6	1	0	1	2	8	2	1	0
mRNA_D-dichotoma_M_contig5020.15360.1	0	0	0	0	0	0	0	0	0	0	0	0	5	16	1	2	7	0	0	0	0	1	5	0	1	4	1
mRNA_D-dichotoma_M_contig5020.15366.1	1	0	0	0	0	0	2	0	0	0	0	0	10	1	14	2	5	24	30	12	11	5	14	41	26	13	13
mRNA_D-dichotoma_M_contig5027.15368.1	36	8	5	0	0	0	60	8	14	25	3	4	307	766	169	477	102	541	370	252	117	191	362	644	574	276	155
mRNA_D-dichotoma_M_contig5027.15369.1	39	23	13	0	0	0	75	23	18	42	7	10	790	1388	532	606	340	1214	742	581	311	405	719	1171	1184	584	224
mRNA_D-dichotoma_M_contig1951.6019.1	2	0	0	15	0	0	5	0	0	4	0	0	19	25	35	34	4	17	35	18	8	5	21	19	17	9	1
mRNA_D-dichotoma_M_contig1953.6024.1	10	2	6	0	0	0	8	0	4	1	0	4	334	728	1191	757	1027	624	450	404	244	289	360	532	798	566	254
mRNA_D-dichotoma_M_contig1953.6026.1	0	0	0	0	0	0	0	0	0	0	0	0	0	0	0	0	0	0	0	0	0	0	0	0	1	0	0
mRNA_D-dichotoma_M_contig1953.6030.1	10	4	2	0	0	0	7	6	4	9	5	2	9	15	8	17	14	7	1	0	0	7	11	16	25	20	5
mRNA_D-dichotoma_M_contig1955.6033.1	0	0	0	0	0	0	0	0	0	0	0	0	0	0	1	1	0	0	0	0	0	0	4	4	1	0	0
mRNA_D-dichotoma_M_contig1956.6036.1	2	0	0	0	0	0	0	0	0	1	0	0	6	18	2	8	15	4	10	8	0	14	0	9	15	7	1
mRNA_D-dichotoma_M_contig1957.6038.1	22	17	20	0	0	0	49	42	33	53	12	34	101	186	753	276	198	74	765	289	163	93	148	78	66	70	64
mRNA_D-dichotoma_M_contig1958.6039.1	1	0	0	79	20	17	1	0	0	0	0	0	0	2	0	2	0	3	4	2	0	0	2	3	1	3	16
mRNA_D-dichotoma_M_contig241.8251.1	0	0	0	0	0	0	0	0	0	0	0	0	0	0	0	0	0	0	0	0	0	0	0	3	0	0	0
mRNA_D-dichotoma_M_contig241.8252.1	0	0	0	0	0	0	1	0	4	9	0	5	97	23	25	47	8	8	16	7	0	8	113	297	203	103	56
mRNA_D-dichotoma_M_contig241.8253.1	911	311	340	2	2	0	736	249	258	509	82	112	1661	3343	3055	2490	2629	2726	4007	2402	1628	1956	4473	3264	3163	2811	2016
mRNA_D-dichotoma_M_contig242.8292.1	11	15	5	0	0	0	9	8	15	130	37	41	69	513	989	439	741	122	743	459	172	57	1777	414	587	427	325
mRNA_D-dichotoma_M_contig243.8321.1	8	4	2	0	0	0	0	1	3	3	1	2	240	114	269	281	282	121	235	212	103	103	221	100	125	181	142
mRNA_D-dichotoma_M_contig2771.9549.1	0	0	0	0	0	0	0	0	0	0	0	0	0	0	0	0	0	0	0	0	0	0	0	0	0	0	0
mRNA_D-dichotoma_M_contig2771.9550.1	57	11	11	0	0	0	42	9	5	14	5	4	0	0	0	0	0	3	3	4	0	0	0	0	0	0	0
mRNA_D-dichotoma_M_contig2773.9555.1	0	0	0	0	0	0	0	0	0	0	0	0	0	0	0	0	0	0	1	0	0	0	0	0	1	0	0
mRNA_D-dichotoma_M_contig2774.9557.1	4	1	4	0	0	0	4	1	0	4	0	1	0	0	3	1	0	0	3	0	0	0	102	2	6	0	0
mRNA_D-dichotoma_M_contig2776.9561.1	9	4	3	11	3	10	18	1	1	3	1	4	7	5	11	5	18	2	16	14	4	1	28	15	7	22	96
mRNA_D-dichotoma_M_contig2776.9562.1	211	98	77	35	9	21	294	63	62	174	27	45	45	158	206	65	211	31	318	136	60	26	410	117	110	51	133
mRNA_D-dichotoma_M_contig1697.4745.1	15	5	14	5	0	3	17	15	9	8	2	0	772	714	911	927	851	416	920	695	82	143	1129	746	607	570	175
mRNA_D-dichotoma_M_contig1697.4748.1	0	0	0	10	3	9	0	0	0	0	0	0	0	0	0	0	0	0	0	0	0	0	1	1	0	0	0
mRNA_D-dichotoma_M_contig1698.4749.1	12	10	11	171	67	110	4	13	11	54	41	25	832	206	555	706	507	323	474	624	289	201	789	383	241	436	444
mRNA_D-dichotoma_M_contig1698.4751.1	11	12	17	111	64	74	8	15	18	54	30	38	1798	530	899	1383	1266	641	828	1089	765	564	1376	823	561	1298	1302
mRNA_D-dichotoma_M_contig1700.4785.1	221	110	187	33	12	7	182	183	122	113	33	72	1710	862	2088	1274	1719	1555	1745	1426	663	847	1266	1361	2386	2097	954
mRNA_D-dichotoma_M_contig1701.4792.1	4	0	3	0	0	0	31	2	2	28	2	11	521	567	688	560	396	476	571	468	172	196	632	597	507	275	328
mRNA_D-dichotoma_M_contig1701.4793.1	4	1	2	0	0	0	28	4	9	29	7	9	564	836	610	543	289	431	766	611	105	106	757	589	493	258	253
mRNA_D-dichotoma_M_contig1702.4795.1	0	0	0	0	0	0	0	0	0	0	0	0	0	0	0	0	0	0	1	1	0	0	2	0	0	0	0
mRNA_D-dichotoma_M_contig1236.1871.1	0	0	0	0	0	0	0	0	0	1	0	0	8	39	0	21	52	81	13	29	11	38	84	38	49	27	22
mRNA_D-dichotoma_M_contig1237.1874.1	0	0	0	0	0	0	0	0	0	0	0	0	0	0	0	0	0	0	0	0	0	0	0	0	0	0	0
mRNA_D-dichotoma_M_contig1237.1875.1	2	0	0	0	0	0	1	0	4	6	1	1	0	23	9	19	12	20	19	9	4	4	22	19	16	10	10
mRNA_D-dichotoma_M_contig1237.1877.1	0	0	0	0	0	0	0	0	0	0	0	0	0	1	15	2	0	4	5	8	0	2	3	0	39	0	0
mRNA_D-dichotoma_M_contig1237.1878.1	5	0	1	0	0	0	6	1	0	8	0	2	16	19	33	6	5	23	32	23	0	2	45	22	32	5	2
mRNA_D-dichotoma_M_contig1237.1879.1	76	6	12	0	0	0	78	11	13	23	4	12	210	290	262	448	260	273	303	299	106	130	352	367	276	231	181
mRNA_D-dichotoma_M_contig1238.1881.1	8	4	11	2	1	0	18	13	23	42	22	32	286	147	417	347	206	114	354	249	77	65	551	226	141	255	114
mRNA_D-dichotoma_M_contig1238.1884.1	3	0	3	0	0	0	4	3	4	12	2	8	42	37	105	98	49	29	96	92	10	2	115	47	17	67	31
mRNA_D-dichotoma_M_contig1239.1889.1	16	9	5	2	0	0	21	22	4	27	10	8	0	4	15	0	0	3	7	6	0	5	3	4	3	4	1
mRNA_D-dichotoma_M_contig1239.1890.1	789	695	756	948	84	637	314	510	508	323	230	447	19427	7641	26512	17507	12900	9492	11918	13558	5299	5207	11159	9921	8255	9287	7050
mRNA_D-dichotoma_M_contig1240.1908.1	1	0	0	15	3	0	4	0	0	12	0	0	237	101	117	160	132	81	186	190	38	54	124	226	109	164	80
mRNA_D-dichotoma_M_contig1240.1909.1	0	0	0	0	0	0	0	0	0	0	0	0	0	0	0	0	0	0	0	0	0	0	0	0	0	0	0
mRNA_D-dichotoma_M_contig457.14437.1	0	0	0	0	0	0	0	0	0	0	0	0	0	0	1	0	4	2	1	1	0	0	0	3	3	1	5
mRNA_D-dichotoma_M_contig457.14438.1	37	1	0	1	0	0	40	0	0	53	0	1	9	12	9	2	23	1	4	1	0	3	3	13	24	15	3
mRNA_D-dichotoma_M_contig457.14440.1	1	1	0	0	0	0	0	0	2	1	0	0	6	12	2	3	3	7	21	15	2	2	14	0	1	2	2
mRNA_D-dichotoma_M_contig458.14458.1	21	15	30	1	2	2	56	32	15	84	32	52	239	370	611	815	442	401	575	554	383	356	637	498	448	550	480
mRNA_D-dichotoma_M_contig459.14475.1	438	274	342	16	17	16	589	142	251	747	350	315	5727	8613	5007	9202	7657	8700	6805	6691	9632	7714	7480	11812	14772	12551	6196
mRNA_D-dichotoma_M_contig459.14476.1	17	6	22	1	1	0	16	6	5	26	15	29	93	168	166	531	433	272	170	212	486	357	217	305	376	598	368
mRNA_D-dichotoma_M_contig459.14478.1	132	48	74	7	5	2	99	43	36	159	66	75	591	836	914	820	643	1130	919	885	551	451	991	1320	1440	973	424
mRNA_D-dichotoma_M_contig4561.14417.1	25	9	10	0	0	0	7	4	3	36	16	18	816	1505	1752	1646	973	1043	1256	957	416	678	1004	1345	1392	1148	489
mRNA_D-dichotoma_M_contig4562.14418.1	0	0	0	0	0	0	0	0	0	0	0	0	0	0	0	7	8	0	0	0	5	1	0	0	0	2	16
mRNA_D-dichotoma_M_contig4569.14421.1	0	0	0	0	0	0	0	0	0	1	0	0	0	10	2	1	12	0	1	3	3	2	7	7	0	2	0
mRNA_D-dichotoma_M_contig4574.14444.1	0	0	0	0	0	0	0	0	0	0	0	0	0	0	0	0	0	0	0	0	0	0	0	0	0	0	0
mRNA_D-dichotoma_M_contig4575.14445.1	1	0	1	0	0	0	1	0	0	1	0	0	3	4	0	2	0	2	1	0	1	1	10	19	16	10	4
mRNA_D-dichotoma_M_contig4575.14447.1	8	3	6	0	0	0	7	0	5	5	4	0	51	34	150	114	129	20	122	83	11	7	95	65	42	41	35
mRNA_D-dichotoma_M_contig4581.14464.1	2	1	0	1	0	0	3	0	1	22	0	1	123	198	135	320	279	63	155	97	58	33	180	149	88	197	74
mRNA_D-dichotoma_M_contig4589.14469.1	0	0	0	0	0	0	0	0	0	0	0	0	0	0	0	0	0	0	0	0	0	0	0	0	0	0	0
mRNA_D-dichotoma_M_contig91.19826.1	25	30	11	0	0	0	21	30	2	56	14	18	0	6	4	0	0	0	0	0	0	0	0	0	0	0	0
mRNA_D-dichotoma_M_contig91.19833.1	0	0	0	0	5	0	1	0	1	0	0	1	0	0	0	11	10	0	0	0	31	8	0	0	0	4	19
mRNA_D-dichotoma_M_contig91.19842.1	5	6	5	61	27	50	1	3	4	7	8	4	707	270	707	1146	919	307	356	514	309	280	626	434	359	635	536
mRNA_D-dichotoma_M_contig92.19925.1	643	250	408	1	0	0	467	252	254	253	66	91	2163	2030	3811	2602	2527	2230	2605	2175	2089	2112	2786	2167	2382	2613	2376
mRNA_D-dichotoma_M_contig92.19939.1	3	1	0	0	0	0	8	7	7	13	7	9	49	22	96	27	25	19	32	29	4	0	81	25	20	16	2
mRNA_D-dichotoma_M_contig112.1027.1	9	6	7	79	5	51	18	1	3	11	3	4	0	0	4	1	0	0	11	7	0	4	1	34	0	39	83
mRNA_D-dichotoma_M_contig113.1082.1	0	0	0	0	0	0	0	0	0	0	0	0	0	0	0	0	0	0	1	0	0	0	0	0	1	0	0
mRNA_D-dichotoma_M_contig2901.10041.1	139	84	92	68	7	49	266	85	144	402	154	186	8101	6417	8359	10850	5944	4435	7773	8585	5945	3807	10656	8369	6780	7067	7786
mRNA_D-dichotoma_M_contig2901.10042.1	7	7	3	32	1	30	16	4	1	4	3	2	4	1	13	0	0	0	12	2	0	0	2	11	2	64	89
mRNA_D-dichotoma_M_contig2901.10046.1	1	2	0	21	4	38	2	1	0	1	2	1	0	0	3	0	0	0	1	2	0	0	2	4	0	30	64
mRNA_D-dichotoma_M_contig2911.10077.1	46	23	34	90	36	66	65	29	51	112	44	33	985	601	1831	885	358	427	601	613	611	611	517	755	613	511	1615
mRNA_D-dichotoma_M_contig2911.10078.1	8	9	23	30	6	31	12	7	29	37	26	28	142	103	410	277	227	125	119	128	159	156	108	115	84	101	369
mRNA_D-dichotoma_M_contig2912.10083.1	95	92	106	4	0	1	49	73	60	229	129	100	2985	516	1115	1327	1437	2000	1345	1907	1742	2656	2472	1845	844	1717	3770
mRNA_D-dichotoma_M_contig1145.1207.1	30	11	31	4	0	6	26	13	24	27	9	10	196	258	239	545	361	212	243	242	193	178	216	273	178	413	266
mRNA_D-dichotoma_M_contig1146.1209.1	13	3	5	0	0	0	1	2	10	8	5	1	61	50	123	46	41	33	137	102	53	24	138	34	21	35	53
mRNA_D-dichotoma_M_contig1146.1211.1	8	6	18	0	0	0	2	4	2	1	3	0	150	42	157	82	78	58	160	218	101	56	112	51	23	65	116
mRNA_D-dichotoma_M_contig1147.1215.1	5	5	0	0	0	0	7	1	2	2	0	1	0	7	8	3	0	0	2	4	0	1	0	3	2	0	0
mRNA_D-dichotoma_M_contig1148.1217.1	83	45	71	1	1	0	44	33	54	76	38	49	609	833	1095	1394	944	856	922	1246	817	579	1177	866	819	1109	943
mRNA_D-dichotoma_M_contig1150.1245.1	17	4	5	4	1	0	56	9	13	21	3	8	49	116	32	60	67	86	71	50	40	70	65	54	41	42	41
mRNA_D-dichotoma_M_contig1060.571.1	10	4	2	0	0	0	16	5	1	12	3	4	0	4	0	0	0	0	1	2	0	0	7	0	1	1	0
mRNA_D-dichotoma_M_contig1060.575.1	63	42	58	0	0	0	52	38	34	44	25	37	22	61	102	79	122	32	58	29	58	32	51	29	81	73	45
mRNA_D-dichotoma_M_contig1061.584.1	185	96	77	32	3	21	127	59	56	103	14	20	425	518	459	1194	1002	388	429	353	1540	1244	437	392	478	1190	1141
mRNA_D-dichotoma_M_contig1061.585.1	12	3	7	3	1	0	3	8	3	1	0	1	210	158	121	147	149	127	173	165	36	30	393	189	168	120	77
mRNA_D-dichotoma_M_contig1062.591.1	2	1	0	0	0	0	2	0	1	4	1	0	34	126	75	151	103	61	103	58	27	73	144	115	84	94	59
mRNA_D-dichotoma_M_contig1063.597.1	9	0	0	3	0	0	7	1	1	4	0	2	16	23	4	14	0	14	16	19	4	2	23	12	10	15	12
mRNA_D-dichotoma_M_contig1217.1748.1	22	9	10	111	49	87	23	16	17	39	19	20	87	53	434	221	214	62	185	107	47	22	376	53	39	229	76
mRNA_D-dichotoma_M_contig1217.1749.1	8	1	8	19	12	19	1	6	5	5	7	4	20	9	50	57	60	14	34	22	9	9	99	5	8	65	25
mRNA_D-dichotoma_M_contig1217.1750.1	13	6	13	42	22	57	9	7	20	11	10	22	38	44	123	111	108	15	85	44	45	31	142	20	33	166	43
mRNA_D-dichotoma_M_contig2164.7170.1	0	0	0	1	0	0	0	0	0	0	0	0	0	1	1	0	0	1	0	0	0	0	1	4	1	0	0
mRNA_D-dichotoma_M_contig2165.7175.1	23	26	6	0	0	0	13	23	21	65	3	29	0	0	0	0	0	0	0	0	0	0	0	0	0	0	0
mRNA_D-dichotoma_M_contig2169.7184.1	3	0	0	15	1	4	2	1	0	2	0	1	7	43	10	193	11	39	139	65	12	12	87	491	297	214	48
mRNA_D-dichotoma_M_contig232.7862.1	0	0	0	0	0	0	0	0	0	0	1	0	4	4	0	2	0	0	1	0	0	0	10	10	5	2	2
mRNA_D-dichotoma_M_contig233.7898.1	0	0	1	0	0	0	0	0	0	0	0	0	5	0	0	2	0	0	0	0	0	0	3	2	0	0	1
mRNA_D-dichotoma_M_contig233.7899.1	53	19	30	1	0	0	75	14	56	70	20	17	1149	1310	2277	2011	1416	834	1996	1247	550	579	2204	1276	761	1163	869
mRNA_D-dichotoma_M_contig181.5353.1	0	0	0	0	0	0	2	1	0	1	0	0	58	53	150	69	51	90	150	150	10	28	23	77	72	45	29
mRNA_D-dichotoma_M_contig182.5388.1	1	0	0	94	61	64	2	1	3	20	17	12	591	197	597	593	710	358	515	761	372	222	1008	370	186	612	582
mRNA_D-dichotoma_M_contig183.5426.1	34	36	22	0	0	0	81	38	22	135	45	63	19	168	161	87	177	19	115	58	1	9	23	32	94	11	8
mRNA_D-dichotoma_M_contig183.5427.1	104	51	48	0	0	0	69	33	47	173	39	59	1023	327	615	451	171	71	125	74	18	60	941	249	428	233	137
mRNA_D-dichotoma_M_contig183.5429.1	28	7	9	0	0	0	6	3	7	20	3	5	171	65	136	104	166	59	43	25	10	63	256	77	141	80	60
mRNA_D-dichotoma_M_contig2378.8090.1	19	7	8	0	0	0	40	6	4	17	2	5	26	29	98	31	13	14	42	27	0	3	17	43	45	4	15
mRNA_D-dichotoma_M_contig2378.8091.1	8	7	1	0	0	0	32	9	13	23	1	3	8	34	33	46	21	7	33	27	6	5	10	15	24	14	21
mRNA_D-dichotoma_M_contig2378.8092.1	2	1	0	0	0	0	8	0	0	5	2	0	19	23	23	45	48	6	22	19	4	4	22	29	22	18	9
mRNA_D-dichotoma_M_contig2379.8097.1	55	17	10	9	4	4	36	6	10	15	2	4	74	103	57	86	34	67	166	141	58	46	132	97	112	82	72
mRNA_D-dichotoma_M_contig2379.8098.1	33	7	8	14	1	1	16	1	10	7	2	1	34	52	56	62	8	24	142	115	1	8	91	58	60	33	12
mRNA_D-dichotoma_M_contig2379.8099.1	24	1	3	2	0	3	6	2	1	5	0	1	12	28	36	47	44	15	93	62	3	11	80	30	22	34	19
mRNA_D-dichotoma_M_contig2382.8120.1	163	118	156	4699	709	2464	253	165	215	751	527	582	6027	2469	7607	7597	6127	2866	4994	6283	2680	2046	7673	4108	3286	5296	4377
mRNA_D-dichotoma_M_contig2387.8139.1	0	0	0	0	0	0	0	0	0	1	0	0	0	0	0	0	0	0	3	0	0	0	8	6	8	5	0
mRNA_D-dichotoma_M_contig2234.7464.1	0	0	0	2	0	0	8	4	0	13	2	1	206	221	242	397	265	131	291	296	25	35	209	216	80	133	111
mRNA_D-dichotoma_M_contig2237.7473.1	9	0	4	4	1	0	3	2	3	7	2	4	140	179	227	402	225	116	191	162	40	43	543	282	255	438	163
mRNA_D-dichotoma_M_contig2237.7474.1	3	1	0	2	6	0	2	2	2	2	0	2	90	142	128	174	79	106	209	159	15	35	166	121	85	93	38
mRNA_D-dichotoma_M_contig2237.7475.1	0	0	0	0	0	0	1	0	0	0	0	0	69	6	11	23	0	1	67	63	2	0	97	135	86	82	14
mRNA_D-dichotoma_M_contig189.5699.1	0	0	0	0	0	0	0	0	0	1	0	0	14	40	20	47	51	14	44	30	0	11	21	55	17	54	34
mRNA_D-dichotoma_M_contig190.5767.1	0	0	0	1	1	1	0	0	0	0	0	4	12	40	54	23	58	20	30	19	0	3	40	46	19	21	11
mRNA_D-dichotoma_M_contig190.5770.1	0	1	2	13	1	4	0	0	0	0	0	0	11	0	1	0	0	8	0	2	4	16	1	4	0	1	16
mRNA_D-dichotoma_M_contig190.5771.1	0	0	0	0	0	0	0	0	0	0	0	0	0	0	0	0	0	0	0	1	0	0	0	0	1	0	0
mRNA_D-dichotoma_M_contig191.5817.1	0	0	0	70	7	71	0	0	0	0	0	0	0	0	3	1	0	0	5	0	1	0	0	7	0	82	94
mRNA_D-dichotoma_M_contig191.5825.1	0	1	1	0	0	0	3	0	7	6	8	10	16	16	23	22	15	18	19	15	2	2	45	34	9	28	14
mRNA_D-dichotoma_M_contig191.5826.1	81	102	75	4	1	3	133	47	129	348	199	153	447	405	461	684	445	286	464	538	211	249	1307	565	560	717	504
mRNA_D-dichotoma_M_contig191.5831.1	0	0	0	15	22	8	0	0	0	0	0	1	0	0	2	0	0	0	1	2	0	0	6	8	0	13	29
mRNA_D-dichotoma_M_contig46.14502.1	21	3	13	0	0	0	19	27	26	37	26	13	302	253	531	493	413	310	493	562	94	89	607	258	142	256	260
mRNA_D-dichotoma_M_contig46.14503.1	4	2	13	0	0	0	4	7	7	17	10	8	397	180	579	536	303	228	382	408	112	101	502	314	149	293	228
mRNA_D-dichotoma_M_contig47.14662.1	0	0	0	0	0	0	0	0	0	0	0	0	1	10	2	0	0	1	0	0	1	1	2	2	2	1	1
mRNA_D-dichotoma_M_contig47.14663.1	10	3	1	24	5	6	3	4	2	6	0	3	463	78	503	167	70	177	258	217	19	25	267	210	141	72	55
mRNA_D-dichotoma_M_contig47.14671.1	2	2	1	0	0	0	37	2	3	0	1	0	0	13	3	3	23	2	8	8	5	5	39	38	48	9	12
mRNA_D-dichotoma_M_contig47.14674.1	0	0	0	0	0	0	0	0	0	0	0	0	0	0	1	0	0	2	0	2	0	0	0	1	0	0	0
mRNA_D-dichotoma_M_contig47.14676.1	2	0	4	54	1	18	4	0	1	3	1	0	13	0	111	9	0	4	30	23	0	0	7	4	0	8	90
mRNA_D-dichotoma_M_contig47.14678.1	0	1	0	20	0	12	2	0	0	0	0	0	0	0	25	9	5	2	31	14	3	0	1	21	1	17	67
mRNA_D-dichotoma_M_contig2108.6895.1	256	183	196	1	10	9	111	215	210	120	124	128	2541	1049	2817	3137	2241	1667	2922	3229	1320	1377	2539	1410	1694	2027	1532
mRNA_D-dichotoma_M_contig2114.6930.1	1	3	2	0	0	0	2	0	1	10	1	3	81	156	147	118	115	43	26	20	14	31	35	124	66	36	58
mRNA_D-dichotoma_M_contig2116.6937.1	157	84	81	1	0	0	227	47	67	95	32	39	2918	1683	2061	1494	749	1584	1815	1744	1941	1905	1449	1693	1493	1357	1944
mRNA_D-dichotoma_M_contig2117.6938.1	150	31	70	0	0	0	286	62	103	151	40	47	1214	1570	2035	1761	904	714	2677	2276	592	380	1958	1875	1471	1075	910
mRNA_D-dichotoma_M_contig2117.6939.1	0	0	0	0	0	0	0	0	0	0	0	0	0	1	0	0	0	0	0	0	0	0	0	0	0	0	0
mRNA_D-dichotoma_M_contig1666.4599.1	0	0	1	26	8	11	0	2	0	3	0	1	0	3	4	2	0	0	0	1	1	0	2	7	1	7	38
mRNA_D-dichotoma_M_contig553.16206.1	0	0	0	0	0	0	0	0	0	0	0	0	0	0	0	0	0	0	0	1	0	0	0	0	0	0	0
mRNA_D-dichotoma_M_contig554.16227.1	2	0	1	1	0	0	7	0	0	1	5	1	9	6	25	2	0	0	7	4	1	3	286	9	30	23	30
mRNA_D-dichotoma_M_contig554.16228.1	1	0	1	0	0	0	1	0	0	5	1	0	6	0	4	1	3	0	5	2	0	0	154	1	12	2	8
mRNA_D-dichotoma_M_contig555.16234.1	4	2	1	2453	247	1017	3	7	6	1	2	1	17	12	20	32	28	7	50	22	8	6	49	19	21	26	16
mRNA_D-dichotoma_M_contig767.18524.1	4	6	7	0	0	0	8	8	14	23	5	12	212	55	216	175	160	78	88	119	67	46	180	49	51	128	102
mRNA_D-dichotoma_M_contig768.18528.1	81	58	25	0	0	0	70	29	36	62	26	25	13	0	4	0	0	0	2	1	0	0	3	0	0	0	0
mRNA_D-dichotoma_M_contig768.18529.1	24	5	7	0	0	0	15	3	13	8	5	4	11	0	1	0	0	0	0	0	0	0	0	0	0	0	0
mRNA_D-dichotoma_M_contig768.18530.1	0	0	0	0	0	0	0	0	0	3	1	0	7	12	14	0	0	1	19	5	5	3	34	0	9	9	1
mRNA_D-dichotoma_M_contig768.18531.1	0	3	1	0	0	0	1	0	0	6	0	1	18	13	55	3	0	4	35	15	11	7	60	0	22	7	6
mRNA_D-dichotoma_M_contig768.18532.1	1	0	0	0	0	0	0	0	1	1	1	0	0	6	19	4	0	3	8	4	0	0	17	0	6	2	0
mRNA_D-dichotoma_M_contig768.18535.1	3	2	5	2	0	0	4	4	0	9	4	9	24	33	31	132	81	31	47	31	24	28	37	31	29	76	20
mRNA_D-dichotoma_M_contig771.18571.1	141	149	54	20	3	4	340	57	64	196	49	47	495	1621	535	987	578	483	879	541	130	362	1092	1494	726	800	210
mRNA_D-dichotoma_M_contig771.18576.1	0	3	0	11	10	8	0	1	2	0	0	0	0	0	0	39	2	0	0	0	24	13	0	0	0	29	28
mRNA_D-dichotoma_M_contig5173.15621.1	0	0	0	0	0	0	0	0	0	0	0	0	0	1	1	0	0	0	0	0	0	0	0	0	0	0	0
mRNA_D-dichotoma_M_contig5207.15689.1	7	4	2	0	0	0	29	2	5	5	0	1	66	81	47	44	38	41	58	63	3	4	95	68	70	26	6
mRNA_D-dichotoma_M_contig5212.15697.1	0	0	0	2	1	0	0	0	0	4	0	1	4	23	42	0	0	0	0	0	0	0	113	29	9	33	137
mRNA_D-dichotoma_M_contig1546.3843.1	156	52	46	58	10	28	217	51	38	112	35	16	3	3	12	2	0	15	71	52	7	21	32	25	3	31	63
mRNA_D-dichotoma_M_contig1547.3846.1	0	2	1	5	2	6	1	0	1	2	0	0	12	10	14	1	0	1	4	4	0	2	16	50	16	34	113
mRNA_D-dichotoma_M_contig1549.3854.1	45	25	10	140	2	38	39	10	3	16	2	5	3	1	13	0	4	2	38	17	1	2	10	25	3	8	3
mRNA_D-dichotoma_M_contig1551.3876.1	2	0	0	6	0	4	0	1	0	3	1	0	3	6	6	9	15	1	11	11	6	2	8	9	5	14	37
mRNA_D-dichotoma_M_contig1551.3878.1	0	0	0	0	0	0	0	0	0	0	0	0	5	0	7	6	12	2	2	2	0	2	18	16	8	23	5
mRNA_D-dichotoma_M_contig295.10184.1	0	0	0	0	0	0	0	0	0	0	0	0	0	0	0	1	0	0	0	0	0	0	0	0	0	2	0
mRNA_D-dichotoma_M_contig295.10186.1	113	55	82	1515	164	1069	88	58	102	178	94	89	3217	2657	4026	4926	3165	2608	3967	4028	1873	1766	5359	3679	2723	3328	3058
mRNA_D-dichotoma_M_contig295.10189.1	100	64	102	1	2	6	67	47	89	97	81	88	4852	2657	5524	6462	4616	3986	4365	4778	2970	3136	3815	3370	3594	4943	3773
mRNA_D-dichotoma_M_contig671.17632.1	48	18	24	0	0	0	27	17	27	36	7	8	223	155	458	329	381	314	359	218	130	142	450	188	238	274	185
mRNA_D-dichotoma_M_contig671.17634.1	290	198	162	0	0	0	289	140	136	292	82	85	710	939	658	1692	1853	734	1063	682	2765	2227	1251	811	1025	2108	2554
mRNA_D-dichotoma_M_contig671.17636.1	82	58	67	1094	383	703	64	33	41	84	55	43	3810	1894	4681	4855	2598	2116	3242	3509	1468	1485	3353	2748	2300	3277	1900
mRNA_D-dichotoma_M_contig672.17639.1	0	0	0	0	0	0	2	0	0	2	0	0	0	0	0	0	0	0	0	0	0	0	1	0	0	1	0
mRNA_D-dichotoma_M_contig672.17640.1	1	0	1	0	0	0	1	1	1	0	0	0	0	0	0	1	0	0	0	2	0	0	0	0	0	0	0
mRNA_D-dichotoma_M_contig673.17644.1	2	0	2	1143	398	727	8	6	4	3	1	3	7	4	70	40	1	10	38	24	12	14	27	105	5	263	435
mRNA_D-dichotoma_M_contig3697.12396.1	0	1	0	33	8	8	16	3	3	7	1	0	14	9	23	8	23	4	8	9	3	1	11	9	5	23	14
mRNA_D-dichotoma_M_contig3717.12453.1	1	2	0	1	6	2	8	1	4	12	4	3	2	47	38	13	8	7	50	33	16	6	64	59	33	18	61
mRNA_D-dichotoma_M_contig3342.11464.1	0	0	0	0	0	0	0	0	0	0	0	0	9	20	16	4	8	6	6	13	7	2	10	11	16	15	3
mRNA_D-dichotoma_M_contig3342.11467.1	17	10	4	0	0	0	24	14	12	19	8	5	160	204	369	830	646	304	327	288	247	307	411	286	304	431	421
mRNA_D-dichotoma_M_contig3343.11470.1	0	0	0	0	0	0	2	0	0	1	0	0	0	9	12	15	7	0	2	3	0	4	8	0	0	0	12
mRNA_D-dichotoma_M_contig3344.11471.1	19	6	7	1	0	1	31	4	10	38	1	3	0	0	0	0	0	0	5	4	1	1	0	0	0	7	0
mRNA_D-dichotoma_M_contig3347.11473.1	0	0	0	0	0	0	0	0	0	0	0	0	0	0	0	2	0	4	0	0	0	0	0	2	0	0	0
mRNA_D-dichotoma_M_contig3347.11474.1	0	0	0	1	0	0	2	0	0	1	0	0	4	1	4	0	9	4	6	0	5	7	2	1	1	2	6
mRNA_D-dichotoma_M_contig3350.11488.1	0	0	0	0	0	0	0	0	0	0	0	0	0	10	5	5	2	6	0	0	1	0	1	2	4	2	0
mRNA_D-dichotoma_M_contig3351.11489.1	33	1	0	33	1	0	41	1	0	28	1	0	0	1	6	1	21	0	1	1	1	1	2	5	12	0	4
mRNA_D-dichotoma_M_contig3357.11500.1	3	1	2	0	0	0	3	0	4	3	2	4	0	0	0	0	0	1	3	2	0	0	20	0	4	1	2
mRNA_D-dichotoma_M_contig3358.11501.1	0	0	0	0	0	0	0	0	0	0	0	0	0	0	0	0	0	0	0	0	0	0	0	0	0	0	0
mRNA_D-dichotoma_M_contig355.11986.1	25	32	28	0	0	0	70	17	15	107	40	43	280	389	281	409	349	197	410	369	221	238	468	531	328	374	479
mRNA_D-dichotoma_M_contig355.11992.1	0	0	0	0	0	0	0	0	0	0	0	0	0	35	3	2	11	1	13	6	0	0	0	4	1	1	0
mRNA_D-dichotoma_M_contig356.12013.1	10	0	2	0	0	0	2	2	1	5	0	1	1	1	7	2	0	4	21	8	23	0	18	36	17	1	1
mRNA_D-dichotoma_M_contig356.12014.1	0	0	0	0	0	0	0	0	0	0	0	0	0	0	0	0	0	0	0	0	0	0	0	0	0	0	0
mRNA_D-dichotoma_M_contig1006.139.1	3	0	0	0	0	0	0	0	0	1	0	1	172	51	38	21	27	138	48	54	128	202	41	42	53	29	255
mRNA_D-dichotoma_M_contig1007.144.1	0	0	0	0	0	0	0	0	0	0	0	0	0	1	3	1	0	2	0	2	0	0	3	0	0	1	0
mRNA_D-dichotoma_M_contig1010.176.1	7	1	5	10	5	3	4	2	6	20	6	10	3	12	56	16	0	5	73	32	6	2	30	37	7	149	320
mRNA_D-dichotoma_M_contig1011.188.1	4628	2371	2434	4	0	5	2788	1582	1811	1426	393	522	61524	66411	93246	55803	67150	32933	65567	42323	28727	17421	153977	53728	86805	38003	23288
mRNA_D-dichotoma_M_contig1714.4858.1	82	27	30	0	0	0	225	45	29	59	7	12	44	36	278	131	112	45	258	146	10	35	51	4	15	13	12
mRNA_D-dichotoma_M_contig1715.4865.1	78	78	60	0	0	0	80	57	66	152	86	63	1602	2587	3424	4407	2965	2165	3611	3639	737	943	3886	3657	2276	3694	2189
mRNA_D-dichotoma_M_contig1716.4867.1	0	0	0	0	0	0	0	0	0	0	1	0	32	65	38	28	21	23	0	0	10	9	19	69	30	10	1
mRNA_D-dichotoma_M_contig1716.4868.1	40	11	13	25	4	12	104	15	24	80	20	14	530	1991	601	1137	715	829	976	576	413	380	698	715	665	529	377
mRNA_D-dichotoma_M_contig1716.4871.1	8	6	4	34	1	2	38	4	7	44	2	5	4577	7282	3908	8366	5146	3969	2785	1621	3082	2564	5916	6306	4980	6114	4179
mRNA_D-dichotoma_M_contig1717.4877.1	14	19	4	0	2	0	14	10	31	67	59	60	53	39	108	21	35	30	59	67	4	6	37	20	12	17	6
mRNA_D-dichotoma_M_contig1719.4882.1	2	0	0	0	0	0	1	0	0	5	0	0	0	3	1	1	0	5	1	2	6	2	2	0	3	5	0
mRNA_D-dichotoma_M_contig68.17683.1	301	234	276	2	0	0	159	184	157	107	33	62	5740	3753	5599	4437	3495	4114	3760	4368	4475	4901	2666	4109	3578	3762	4059
mRNA_D-dichotoma_M_contig68.17685.1	12	1	0	0	0	0	3	3	3	4	0	0	0	77	23	25	6	31	64	36	15	14	46	91	32	27	12
mRNA_D-dichotoma_M_contig68.17693.1	0	0	0	0	0	0	0	0	0	0	0	0	65	52	62	33	0	0	0	0	0	0	134	106	146	44	29
mRNA_D-dichotoma_M_contig69.17767.1	0	0	0	0	0	0	1	0	0	0	1	0	0	0	0	2	9	0	0	0	1	0	4	0	0	0	0
mRNA_D-dichotoma_M_contig700.17913.1	141	156	94	288	88	173	81	71	71	182	78	85	2769	2132	2126	2888	3394	2308	3882	3623	815	1784	5126	4040	2759	3944	3017
mRNA_D-dichotoma_M_contig700.17914.1	26	12	18	1490	215	522	44	15	13	49	15	10	22	7	13	14	8	18	44	20	8	22	32	17	16	21	46
mRNA_D-dichotoma_M_contig701.17915.1	0	0	0	0	0	0	0	0	0	0	0	0	0	4	3	0	0	0	0	0	0	0	0	31	38	18	6
mRNA_D-dichotoma_M_contig701.17919.1	0	0	0	0	0	0	1	0	0	1	0	0	0	0	0	0	0	1	2	0	0	0	2	7	0	0	0
mRNA_D-dichotoma_M_contig701.17920.1	0	0	0	0	0	0	0	0	0	1	0	0	0	1	0	0	0	0	0	0	0	0	0	1	1	0	1
mRNA_D-dichotoma_M_contig701.17922.1	9	4	6	115	10	7	74	16	6	49	6	4	161	233	104	54	34	195	350	301	41	46	357	156	168	83	32
mRNA_D-dichotoma_M_contig702.17925.1	15	6	7	0	0	0	8	8	22	11	10	7	697	312	783	998	648	306	553	543	243	183	700	492	244	629	442
mRNA_D-dichotoma_M_contig702.17930.1	64	16	24	0	0	0	22	7	9	0	0	0	0	0	1	0	0	1	3	5	0	6	8	3	16	5	1
mRNA_D-dichotoma_M_contig703.17935.1	67	46	44	1	2	1	85	49	44	99	45	38	176	631	556	713	720	247	503	467	459	417	574	375	372	513	374
mRNA_D-dichotoma_M_contig5274.15786.1	0	0	0	3	0	0	0	0	0	0	0	0	0	5	8	7	0	0	2	3	0	0	5	0	0	1	4
mRNA_D-dichotoma_M_contig5282.15791.1	3	1	1	2	0	0	0	0	0	0	0	2	10	4	37	5	12	2	5	7	4	1	46	1	11	13	1
mRNA_D-dichotoma_M_contig5282.15794.1	1	1	0	0	0	0	5	0	6	5	0	0	18	28	54	20	28	8	49	21	18	13	210	23	31	28	18
mRNA_D-dichotoma_M_contig5294.15804.1	0	0	0	0	0	0	4	0	0	0	0	0	1	1	2	1	0	2	1	6	0	0	0	0	1	0	0
mRNA_D-dichotoma_M_contig5294.15806.1	3	1	0	0	0	0	4	1	2	3	1	3	24	20	14	26	11	52	67	46	19	8	58	45	33	39	15
mRNA_D-dichotoma_M_contig5294.15807.1	6	1	1	0	0	0	1	3	1	0	0	0	13	3	10	6	6	9	13	19	12	0	10	9	5	1	22
mRNA_D-dichotoma_M_contig5305.15848.1	0	0	0	1	0	0	3	0	1	6	0	3	7	19	6	0	6	44	24	28	3	17	3	15	12	0	4
mRNA_D-dichotoma_M_contig5312.15863.1	0	0	0	0	0	0	0	0	0	0	0	0	0	0	1	8	0	0	1	0	10	10	0	0	0	4	11
mRNA_D-dichotoma_M_contig5316.15867.1	0	0	0	0	0	0	0	0	0	0	0	0	0	0	0	0	0	0	0	0	0	0	0	0	0	0	0
mRNA_D-dichotoma_M_contig5324.15874.1	1	0	0	0	2	4	0	0	0	5	0	0	6	33	13	21	13	2	3	0	1	1	24	14	27	24	9
mRNA_D-dichotoma_M_contig5324.15875.1	0	0	0	0	0	0	2	0	0	1	0	0	7	6	5	2	0	2	10	1	3	0	2	6	10	6	1
mRNA_D-dichotoma_M_contig3076.10633.1	3	2	3	4	3	1	5	1	0	10	2	3	51	111	288	31	28	11	60	32	11	6	56	72	33	43	48
mRNA_D-dichotoma_M_contig3077.10637.1	62	22	45	54	14	19	36	24	22	27	9	15	2628	720	1683	825	381	1035	1107	1136	363	383	1540	1040	1178	615	544
mRNA_D-dichotoma_M_contig3081.10661.1	0	0	0	0	1	1	0	0	0	0	0	0	0	0	0	0	0	0	1	1	0	0	0	2	0	1	9
mRNA_D-dichotoma_M_contig3085.10666.1	1	0	0	16	0	9	4	1	1	0	0	0	3	10	17	5	20	2	32	13	0	0	12	13	6	20	48
mRNA_D-dichotoma_M_contig3085.10668.1	5	1	0	9	0	5	0	2	0	1	0	2	0	0	7	3	2	2	16	6	0	1	5	2	1	3	4
mRNA_D-dichotoma_M_contig3086.10671.1	0	0	0	0	0	0	0	0	0	1	0	0	0	4	3	13	12	7	4	2	0	4	8	2	2	2	2
mRNA_D-dichotoma_M_contig917.19909.1	0	2	0	1	0	0	8	0	0	4	0	0	18	7	8	4	40	2	8	10	3	2	88	3	7	17	4
mRNA_D-dichotoma_M_contig918.19915.1	13	12	7	0	0	0	12	12	7	7	2	5	296	319	314	1183	838	387	342	376	305	383	312	364	368	725	568
mRNA_D-dichotoma_M_contig918.19918.1	4	4	2	0	0	0	5	2	3	11	1	1	22	21	52	62	42	12	29	29	48	29	36	19	11	44	34
mRNA_D-dichotoma_M_contig921.19948.1	73	20	31	0	0	0	76	18	24	41	9	14	29	1	203	17	1	8	217	65	1	1	0	0	0	0	0
mRNA_D-dichotoma_M_contig921.19949.1	14	1	6	0	0	0	37	5	2	12	2	1	12	18	140	36	3	16	148	61	8	24	32	3	5	14	39
mRNA_D-dichotoma_M_contig417.13583.1	8	0	2	2	0	0	2	0	0	0	0	0	0	1	0	0	0	0	1	0	0	0	0	0	0	1	1
mRNA_D-dichotoma_M_contig2842.9813.1	0	0	0	0	0	0	0	0	0	0	0	0	3	8	12	3	2	2	34	37	2	1	2	1	1	5	3
mRNA_D-dichotoma_M_contig2842.9814.1	0	0	0	0	0	0	1	0	0	0	0	0	0	0	0	1	0	0	0	0	0	0	2	1	0	0	0
mRNA_D-dichotoma_M_contig2842.9815.1	0	0	0	0	0	0	0	0	0	0	0	0	0	0	0	0	0	0	0	1	0	0	0	4	0	0	0
mRNA_D-dichotoma_M_contig2850.9838.1	2	4	3	35	3	20	5	2	3	15	1	1	308	802	685	318	347	466	532	370	352	285	196	902	1834	328	310
mRNA_D-dichotoma_M_contig654.17468.1	0	0	0	0	0	0	0	0	0	0	0	0	0	0	0	0	0	0	0	0	0	0	0	0	0	0	0
mRNA_D-dichotoma_M_contig654.17483.1	5	0	1	89	3	62	4	3	0	1	1	1	59	35	34	17	19	30	33	16	3	4	56	82	29	82	106
mRNA_D-dichotoma_M_contig655.17493.1	47	26	14	1	0	2	61	12	12	22	10	11	1215	2258	1645	2068	1162	1805	1210	847	418	728	1186	2208	1625	1366	737
mRNA_D-dichotoma_M_contig656.17494.1	0	3	1	38	1	10	0	2	1	0	0	1	0	0	3	0	0	0	5	0	0	0	4	5	3	7	2
mRNA_D-dichotoma_M_contig358.12067.1	12	0	4	0	0	0	3	0	2	1	1	0	5	15	127	27	42	10	126	40	9	9	23	6	2	12	1
mRNA_D-dichotoma_M_contig358.12068.1	13	3	8	0	0	0	10	1	0	1	1	2	49	24	158	16	14	6	103	29	8	2	16	4	9	3	3
mRNA_D-dichotoma_M_contig360.12137.1	18	6	7	25	3	12	21	7	6	6	1	0	61	117	71	156	82	74	322	194	80	60	189	184	82	119	218
mRNA_D-dichotoma_M_contig360.12138.1	67	50	38	0	0	2	70	27	40	44	23	10	5494	2879	6510	5055	5011	2133	5118	4987	1693	1711	3565	2946	2011	3291	2730
mRNA_D-dichotoma_M_contig361.12166.1	18	5	12	0	0	0	14	14	14	4	2	2	96	96	193	236	124	104	144	161	106	73	206	128	161	133	124
mRNA_D-dichotoma_M_contig361.12167.1	48	10	40	0	0	0	30	21	39	23	8	15	431	220	591	462	315	249	372	312	234	113	405	294	310	331	297
mRNA_D-dichotoma_M_contig361.12168.1	24	6	12	0	0	0	16	8	6	19	7	6	82	83	193	119	70	111	131	111	43	39	168	97	111	69	58
mRNA_D-dichotoma_M_contig361.12169.1	1	0	0	1	0	0	2	0	0	1	0	0	66	68	93	82	43	29	72	76	24	22	75	111	60	52	28
mRNA_D-dichotoma_M_contig688.17758.1	0	0	0	0	0	0	5	1	1	1	0	0	14	36	16	33	22	8	28	9	1	1	36	11	19	8	11
mRNA_D-dichotoma_M_contig689.17760.1	0	0	0	0	0	0	0	0	0	3	1	0	0	0	0	0	0	0	1	0	0	0	7	0	1	5	0
mRNA_D-dichotoma_M_contig19.5741.1	20	10	22	0	0	0	6	15	12	9	8	12	98	107	277	353	290	159	161	123	32	61	185	325	169	132	56
mRNA_D-dichotoma_M_contig19.5742.1	258	212	189	1	3	3	211	121	107	161	61	63	549	1542	1516	1969	909	1159	1062	986	741	888	956	1623	1593	1146	574
mRNA_D-dichotoma_M_contig19.5748.1	170	69	105	5425	2081	2549	80	65	105	151	90	100	1768	1400	2023	2269	1363	1258	2265	2140	939	938	2101	1440	1037	1722	1264
mRNA_D-dichotoma_M_contig19.5761.1	25	29	17	1	0	5	17	18	26	22	8	5	1614	678	1316	1341	1477	732	968	1053	1015	898	1205	966	765	1323	1215
mRNA_D-dichotoma_M_contig19.5764.1	129	19	85	0	0	0	48	25	36	14	2	2	83	88	534	110	55	103	525	354	109	82	135	72	64	58	28
mRNA_D-dichotoma_M_contig19.5765.1	1	0	0	1	0	0	3	0	0	0	0	0	4	16	3	29	42	7	18	5	46	19	10	7	39	33	9
mRNA_D-dichotoma_M_contig20.6295.1	0	0	0	2	0	0	0	0	0	0	0	4	0	0	0	2	0	0	2	1	0	0	4	34	26	7	6
mRNA_D-dichotoma_M_contig20.6311.1	11	9	17	1	0	0	27	33	20	25	17	16	723	222	939	291	443	95	1542	1590	124	27	2323	382	87	334	307
mRNA_D-dichotoma_M_contig1012.189.1	0	2	0	0	0	0	1	5	3	2	5	4	7	22	34	22	20	17	41	44	9	7	60	26	7	11	14
mRNA_D-dichotoma_M_contig1014.210.1	3	1	4	1	0	0	4	3	1	18	3	4	13	6	23	3	0	13	71	42	11	2	3	4	5	2	1
mRNA_D-dichotoma_M_contig1014.212.1	1	0	0	0	0	0	0	0	2	3	1	1	7	9	12	20	5	7	13	5	1	2	20	98	31	32	1
mRNA_D-dichotoma_M_contig1014.215.1	0	1	0	0	0	0	0	0	0	0	2	1	3	23	19	12	0	14	18	12	5	11	24	29	17	25	15
mRNA_D-dichotoma_M_contig589.16744.1	5	4	2	18	3	8	0	4	2	4	0	0	0	0	0	0	0	2	10	0	0	2	3	3	3	5	1
mRNA_D-dichotoma_M_contig589.16749.1	7	2	4	317	100	138	37	12	8	19	8	5	399	846	241	638	347	369	617	396	58	131	1444	696	531	658	140
mRNA_D-dichotoma_M_contig590.16761.1	26	28	18	280	48	180	204	27	26	30	9	10	5357	4062	3784	4945	3093	2125	3660	3163	307	750	5308	4518	3440	3318	1677
mRNA_D-dichotoma_M_contig1066.605.1	11	3	10	0	0	0	3	3	7	4	1	0	360	190	494	311	146	249	343	395	115	157	254	213	202	259	198
mRNA_D-dichotoma_M_contig1066.606.1	4	6	4	0	0	0	7	0	1	1	3	0	181	45	162	42	92	96	108	126	27	36	89	90	109	36	19
mRNA_D-dichotoma_M_contig1067.610.1	2	0	0	1	0	0	1	2	0	1	0	0	9	31	19	16	0	8	19	8	6	2	36	13	15	15	30
mRNA_D-dichotoma_M_contig1068.617.1	20	22	42	25	3	11	18	21	50	78	33	43	175	271	362	867	514	141	421	394	256	147	2146	438	315	752	525
mRNA_D-dichotoma_M_contig1070.634.1	0	0	0	50	7	23	0	0	0	0	0	0	0	0	2	1	0	0	0	0	0	0	0	15	0	18	41
mRNA_D-dichotoma_M_contig1382.2830.1	4	4	2	0	0	0	14	2	5	8	0	1	20	65	32	24	11	12	76	61	11	4	131	84	29	23	22
mRNA_D-dichotoma_M_contig1383.2836.1	1	1	0	0	0	0	1	0	0	4	1	5	3	1	2	7	14	1	0	4	3	1	6	12	3	2	3
mRNA_D-dichotoma_M_contig1384.2838.1	8	1	0	0	0	0	1	0	0	13	0	0	0	0	4	0	5	1	4	2	1	4	3	0	6	1	0
mRNA_D-dichotoma_M_contig1386.2844.1	10	0	2	73	46	30	12	0	3	19	0	2	0	0	0	0	0	2	2	2	0	0	0	3	1	1	0
mRNA_D-dichotoma_M_contig1386.2845.1	2	0	0	30	0	0	4	0	0	4	0	0	0	0	0	0	0	0	0	5	2	0	0	2	0	0	0
mRNA_D-dichotoma_M_contig1386.2846.1	4	1	0	17	17	3	5	0	1	6	1	1	0	2	0	0	0	0	7	0	0	0	0	0	0	0	0
mRNA_D-dichotoma_M_contig1386.2847.1	7	0	0	23	1	0	23	1	0	16	0	0	0	0	0	0	0	7	41	54	0	7	0	0	0	0	0
mRNA_D-dichotoma_M_contig333.11422.1	3	3	0	0	0	0	3	0	1	8	1	4	16	46	19	21	23	6	30	23	3	1	36	10	13	14	8
mRNA_D-dichotoma_M_contig333.11430.1	121	63	92	11	3	7	187	101	228	494	268	260	9388	4448	9703	7700	5787	5205	6866	7224	6008	4973	5566	5453	5546	6368	5612
mRNA_D-dichotoma_M_contig333.11432.1	18	3	12	3	0	2	63	11	18	31	13	3	42	2	56	8	1	27	24	9	41	29	16	39	27	19	17
mRNA_D-dichotoma_M_contig333.11436.1	6	0	2	1	2	0	16	0	3	18	0	0	319	254	244	135	101	95	85	53	31	42	281	313	194	66	39
mRNA_D-dichotoma_M_contig334.11451.1	12	5	1	287	26	122	8	2	0	7	2	3	20	41	55	21	15	10	43	17	14	7	24	63	10	79	248
mRNA_D-dichotoma_M_contig41.13394.1	1	0	0	98	8	8	0	0	0	0	0	0	1	3	1	4	0	0	2	0	0	0	1	1	1	1	0
mRNA_D-dichotoma_M_contig41.13398.1	6	3	3	728	292	464	27	2	9	16	3	0	2	2	7	11	0	5	30	10	7	1	47	23	10	160	247
mRNA_D-dichotoma_M_contig41.13413.1	3	0	3	18	4	21	10	6	9	12	6	7	0	2	10	2	26	1	26	21	2	2	23	6	0	15	32
mRNA_D-dichotoma_M_contig42.13626.1	0	0	0	0	1	0	0	0	0	0	1	1	13	15	10	3	14	3	16	5	0	0	3	23	12	7	11
mRNA_D-dichotoma_M_contig42.13628.1	4	0	0	4	0	0	5	0	0	10	0	0	18	36	17	63	30	27	115	69	1	10	75	53	62	42	17
mRNA_D-dichotoma_M_contig42.13644.1	4	2	0	0	0	0	6	4	6	7	2	4	646	236	540	616	719	269	438	422	149	136	970	405	424	533	299
mRNA_D-dichotoma_M_contig42.13649.1	0	0	0	0	0	0	0	0	0	0	0	0	0	0	3	2	0	1	3	2	2	0	2	5	0	5	1
mRNA_D-dichotoma_M_contig2279.7657.1	0	0	0	1	0	0	0	0	0	1	0	0	3	4	1	0	0	4	1	3	0	0	0	2	5	0	0
mRNA_D-dichotoma_M_contig2282.7678.1	0	0	0	0	0	0	1	1	0	3	2	3	3013	3915	2458	5618	2722	2261	4363	4808	912	1522	3397	2938	2588	3102	2893
mRNA_D-dichotoma_M_contig2285.7688.1	0	0	3	0	0	0	8	3	2	9	7	14	4	10	36	65	36	15	34	35	5	10	61	18	15	56	19
mRNA_D-dichotoma_M_contig2285.7689.1	9	7	4	0	0	0	4	10	15	40	26	40	220	84	308	337	199	122	190	214	50	43	359	152	124	198	144
mRNA_D-dichotoma_M_contig2285.7690.1	1	0	1	0	0	0	0	0	4	2	0	2	21	11	26	49	80	27	26	34	20	23	80	51	16	43	35
mRNA_D-dichotoma_M_contig649.17424.1	0	2	0	1	0	2	1	0	2	0	0	2	0	0	0	36	6	0	0	0	113	32	0	0	0	21	114
mRNA_D-dichotoma_M_contig650.17443.1	0	0	0	0	0	0	0	0	0	0	0	0	0	0	0	0	0	0	0	0	0	0	0	0	0	0	0
mRNA_D-dichotoma_M_contig650.17444.1	0	0	0	0	1	3	0	0	2	1	0	0	0	0	3	0	0	0	0	0	6	2	5	0	1	0	0
mRNA_D-dichotoma_M_contig650.17445.1	4	0	0	0	0	0	0	0	1	0	0	0	0	0	4	1	0	4	0	0	13	3	1	8	7	1	1
mRNA_D-dichotoma_M_contig652.17454.1	8	0	5	34	1	26	3	2	4	1	2	0	53	40	91	38	25	16	41	29	2	7	105	43	54	49	35
mRNA_D-dichotoma_M_contig652.17460.1	0	0	0	3	0	0	1	0	0	1	0	0	6	7	6	14	0	12	47	28	5	6	59	35	16	21	15
mRNA_D-dichotoma_M_contig652.17461.1	0	0	0	0	0	0	0	0	0	0	0	0	0	0	1	1	0	1	0	0	0	0	2	1	1	1	0
mRNA_D-dichotoma_M_contig1861.5566.1	24	26	12	10	2	10	24	18	28	40	19	14	454	317	428	605	495	200	394	489	359	233	461	329	367	498	424
mRNA_D-dichotoma_M_contig1861.5567.1	5	4	5	3	2	3	5	9	9	18	6	8	163	116	232	198	145	71	134	151	84	42	187	81	116	124	85
mRNA_D-dichotoma_M_contig1863.5573.1	2326	1373	1547	16	4	6	2032	1362	1537	1846	800	1245	697	12	2675	860	82	343	1464	2616	93	461	1913	33	248	249	86
mRNA_D-dichotoma_M_contig1865.5580.1	413	368	332	5	1	1	472	230	167	374	134	130	388	733	1084	627	292	733	1435	1281	341	404	800	697	716	400	249
mRNA_D-dichotoma_M_contig1866.5589.1	56	39	32	1	0	1	35	30	72	92	45	57	1598	838	1562	2798	1529	1166	1648	1892	1148	1039	2103	1288	1178	2188	1568
mRNA_D-dichotoma_M_contig1866.5590.1	5	5	7	0	1	2	2	12	18	47	21	21	314	132	536	1047	680	281	418	625	249	158	638	301	185	548	401
mRNA_D-dichotoma_M_contig1867.5594.1	0	0	3	0	0	0	5	1	2	4	0	3	4	7	20	10	19	6	48	42	1	1	25	13	16	5	9
mRNA_D-dichotoma_M_contig1867.5595.1	10	2	5	0	0	1	15	4	10	10	6	4	340	316	714	419	193	256	595	479	102	105	403	330	315	209	140
mRNA_D-dichotoma_M_contig1443.3246.1	14	8	3	1	1	4	39	14	15	28	10	12	310	350	519	269	398	173	549	386	126	175	950	343	378	274	343
mRNA_D-dichotoma_M_contig1443.3254.1	8	0	10	5	0	0	6	10	9	11	5	2	29	30	59	152	192	58	64	94	102	58	85	36	39	98	138
mRNA_D-dichotoma_M_contig1443.3255.1	13	4	9	10	3	5	7	10	24	23	2	10	38	16	50	82	39	28	49	39	81	61	48	22	24	62	36
mRNA_D-dichotoma_M_contig1446.3264.1	0	0	1	22	2	6	3	0	0	2	2	2	0	0	0	1	0	1	0	0	0	0	4	8	0	12	72
mRNA_D-dichotoma_M_contig1449.3277.1	1397	820	772	4042	223	2672	965	404	737	1079	500	552	4469	3875	8722	4989	4032	3065	3629	3694	2313	2133	3951	3924	4058	4065	3071
mRNA_D-dichotoma_M_contig3969.13038.1	11	1	4	0	0	0	28	6	4	3	3	2	0	0	6	1	0	6	25	39	0	8	0	0	0	1	0
mRNA_D-dichotoma_M_contig3970.13044.1	0	0	0	0	0	0	0	0	0	0	0	0	6	15	5	10	24	5	12	12	0	1	40	29	13	12	7
mRNA_D-dichotoma_M_contig3971.13046.1	0	0	0	0	0	0	0	0	0	0	0	0	2	38	34	19	26	5	15	20	0	1	12	72	20	17	2
mRNA_D-dichotoma_M_contig3982.13063.1	1	7	4	0	0	0	11	2	0	1	0	2	0	0	0	5	0	0	1	0	0	2	0	11	7	0	0
mRNA_D-dichotoma_M_contig3987.13067.1	0	0	0	2	0	1	0	0	0	0	0	0	0	4	0	1	0	0	2	0	1	0	0	0	0	0	4
mRNA_D-dichotoma_M_contig3987.13069.1	28	12	14	37	5	49	21	29	4	84	21	16	0	2	0	1	0	1	84	70	2	3	28	23	18	26	17
mRNA_D-dichotoma_M_contig3990.13085.1	0	0	1	0	0	0	1	0	0	0	0	0	0	5	5	2	0	2	5	3	0	0	1	3	2	0	0
mRNA_D-dichotoma_M_contig3990.13086.1	2	1	1	0	0	0	1	0	0	0	4	5	365	808	604	406	370	218	520	451	81	97	548	745	719	268	238
mRNA_D-dichotoma_M_contig3995.13096.1	8	4	1	2126	108	762	21	8	4	4	2	2	34	56	47	19	25	117	180	60	9	23	139	567	285	329	240
mRNA_D-dichotoma_M_contig244.8359.1	0	0	0	0	0	0	0	0	0	0	0	0	1	0	0	0	0	0	0	1	0	0	5	1	0	0	0
mRNA_D-dichotoma_M_contig244.8364.1	4	0	3	2	2	10	1	2	5	3	1	2	22	20	63	83	74	41	40	33	37	37	37	20	35	50	26
mRNA_D-dichotoma_M_contig245.8398.1	7	4	3	155	86	50	29	1	16	34	8	14	293	246	217	462	231	198	348	290	307	389	299	395	285	250	307
mRNA_D-dichotoma_M_contig14.2948.1	110	76	107	1437	588	848	57	63	88	107	73	76	2941	2016	4444	5277	2280	2405	3613	5402	937	1085	4836	3656	2216	3612	1587
mRNA_D-dichotoma_M_contig14.2949.1	16	13	14	0	0	3	16	21	5	45	11	18	611	730	754	1045	1068	471	871	681	85	170	1302	804	810	1113	168
mRNA_D-dichotoma_M_contig14.2951.1	83	50	60	857	513	417	131	86	152	281	107	152	753	534	864	1197	747	828	576	513	983	943	1377	611	861	1135	1206
mRNA_D-dichotoma_M_contig14.2959.1	0	0	1	1	0	0	1	0	0	1	0	0	0	0	0	0	0	0	0	0	0	0	0	1	0	0	0
mRNA_D-dichotoma_M_contig14.2960.1	4	0	1	0	0	0	5	0	1	0	0	0	3	0	0	0	0	0	1	2	0	0	0	1	6	0	0
mRNA_D-dichotoma_M_contig14.2973.1	20	22	13	37	10	21	34	14	14	46	21	16	413	180	329	322	238	166	171	145	226	202	389	240	186	439	456
mRNA_D-dichotoma_M_contig1073.649.1	259	126	190	2	0	2	229	187	274	121	58	88	2039	849	1994	1473	972	1186	1127	1378	1966	1710	1109	1064	1075	1336	1737
mRNA_D-dichotoma_M_contig1076.671.1	6	1	5	2	0	0	4	1	7	3	0	3	331	122	313	290	245	179	192	263	70	135	276	191	131	187	185
mRNA_D-dichotoma_M_contig87.19451.1	206	86	52	11	1	1	203	68	46	193	21	30	24	77	96	26	1	3	51	33	3	2	44	38	12	17	70
mRNA_D-dichotoma_M_contig87.19453.1	9	0	2	3	0	2	11	7	5	10	5	7	395	336	501	752	600	234	344	383	312	345	387	271	256	522	376
mRNA_D-dichotoma_M_contig87.19456.1	0	0	0	30	18	21	2	0	0	0	0	0	0	0	0	0	0	0	0	0	0	0	1	81	2	121	335
mRNA_D-dichotoma_M_contig87.19462.1	4	2	5	213	45	108	7	2	2	10	13	8	15	22	105	100	114	55	98	96	24	11	113	54	21	49	46
mRNA_D-dichotoma_M_contig87.19466.1	78	45	54	9523	2602	4799	61	34	24	67	28	29	67	35	80	71	16	50	129	120	45	50	66	232	141	499	432
mRNA_D-dichotoma_M_contig87.19467.1	21	1	13	261	34	110	6	5	3	6	1	2	0	0	2	0	0	1	17	28	0	3	0	15	0	15	53
mRNA_D-dichotoma_M_contig87.19469.1	0	0	0	30	1	6	0	0	0	0	0	0	0	0	0	1	0	0	0	0	0	0	0	0	0	0	0
mRNA_D-dichotoma_M_contig88.19546.1	0	0	0	31	14	7	1	0	0	0	0	0	0	2	1	1	0	0	2	1	0	0	1	0	0	7	13
mRNA_D-dichotoma_M_contig88.19548.1	0	1	0	35	31	28	0	0	0	2	0	0	0	1	0	0	0	1	2	1	0	0	1	0	1	36	51
mRNA_D-dichotoma_M_contig88.19554.1	2	1	4	0	0	0	1	2	0	2	1	3	188	40	300	329	561	117	134	202	105	131	140	58	82	331	220
mRNA_D-dichotoma_M_contig88.19560.1	20	23	20	0	3	0	23	8	13	27	3	9	890	490	1297	1932	1329	557	929	1146	860	823	1076	790	535	1300	1059
mRNA_D-dichotoma_M_contig88.19561.1	24	14	20	2	0	0	18	14	14	13	12	19	1284	459	1898	1386	860	612	1134	1426	471	411	1249	816	622	798	747
mRNA_D-dichotoma_M_contig8.18824.1	0	2	0	1	4	2	0	0	0	10	2	1	671	477	492	636	494	0	2	4	0	0	5	11	2	1	1
mRNA_D-dichotoma_M_contig8.18845.1	0	0	0	0	0	0	0	0	0	0	0	0	0	0	0	83	35	0	0	0	14	7	0	0	0	19	33
mRNA_D-dichotoma_M_contig8.18852.1	0	0	0	0	0	0	0	0	0	0	0	0	0	0	0	0	0	0	0	0	0	0	0	0	0	0	0
mRNA_D-dichotoma_M_contig8.18854.1	117	38	70	2	2	0	88	33	57	112	42	45	2059	1537	2950	3557	2710	1734	2455	2478	1427	1333	3014	1966	1972	2590	1987
mRNA_D-dichotoma_M_contig8.18855.1	17	5	10	0	0	0	11	16	17	37	19	30	1849	392	2315	1115	875	650	1097	1081	337	251	1267	845	663	590	524
mRNA_D-dichotoma_M_contig8.18856.1	125	84	60	1	1	0	290	67	90	153	47	58	942	2028	1784	1787	1049	701	1652	1149	466	353	2190	2024	1353	1064	559
mRNA_D-dichotoma_M_contig1313.2435.1	1	1	3	0	0	0	1	0	0	9	2	0	11	47	82	47	117	30	22	34	19	8	17	145	89	36	40
mRNA_D-dichotoma_M_contig1313.2436.1	8	0	1	0	0	0	32	2	1	21	4	3	8	4	6	2	7	3	10	5	3	5	10	15	3	3	4
mRNA_D-dichotoma_M_contig1313.2437.1	0	0	0	0	0	0	1	0	0	0	0	0	0	0	0	0	0	0	0	0	0	0	0	0	0	0	0
mRNA_D-dichotoma_M_contig1313.2438.1	0	0	0	0	1	1	0	0	0	0	0	0	0	0	0	1	0	0	0	0	0	0	1	1	1	0	0
mRNA_D-dichotoma_M_contig1315.2441.1	0	0	0	17	0	2	0	0	0	0	0	0	0	0	0	0	0	0	0	0	0	0	0	0	0	0	0
mRNA_D-dichotoma_M_contig1319.2451.1	1	0	0	0	0	0	0	0	0	0	0	0	0	0	0	0	0	0	0	0	0	0	0	0	0	0	0
mRNA_D-dichotoma_M_contig1319.2453.1	17	26	25	0	0	0	26	14	13	42	12	27	29	32	46	75	64	14	20	7	7	5	39	25	27	39	30
mRNA_D-dichotoma_M_contig2029.6459.1	99	68	80	108	142	34	143	58	77	125	44	56	561	333	1405	672	478	187	371	309	157	150	895	523	410	556	296
mRNA_D-dichotoma_M_contig2029.6462.1	404	209	162	14	7	7	451	166	132	285	62	136	1292	1151	1373	555	532	885	1349	1015	457	647	2785	1518	1262	730	819
mRNA_D-dichotoma_M_contig2031.6483.1	0	0	0	0	0	0	0	0	0	0	0	0	0	0	0	0	0	0	0	0	0	0	0	0	0	0	0
mRNA_D-dichotoma_M_contig2031.6484.1	13	4	8	11	4	11	17	11	7	15	3	3	29	151	74	124	118	82	99	80	56	90	166	83	100	110	111
mRNA_D-dichotoma_M_contig2032.6487.1	3	3	0	0	0	0	16	0	1	33	5	3	4	12	8	14	8	7	5	13	3	8	32	16	6	6	3
mRNA_D-dichotoma_M_contig2032.6488.1	40	10	8	176	0	2	119	7	18	210	32	34	723	411	758	190	188	247	796	766	53	46	380	494	300	85	79
mRNA_D-dichotoma_M_contig2032.6489.1	9	7	2	0	0	0	22	12	24	67	21	24	0	0	0	0	0	0	4	2	0	1	5	1	0	0	0
mRNA_D-dichotoma_M_contig2033.6491.1	8	3	1	3	0	0	22	5	6	15	0	1	0	0	0	0	0	0	0	1	0	0	0	0	1	0	0
mRNA_D-dichotoma_M_contig2033.6492.1	1	0	0	0	0	0	2	0	0	1	0	0	1	2	5	2	0	3	10	1	0	0	4	15	21	11	1
mRNA_D-dichotoma_M_contig2034.6497.1	13	4	3	179	38	84	1	6	2	5	0	1	84	81	80	55	81	111	94	121	14	23	168	137	141	56	28
mRNA_D-dichotoma_M_contig2036.6501.1	0	0	0	0	0	0	0	0	0	0	0	0	8	15	1	4	0	21	16	1	18	10	2	13	11	6	2
mRNA_D-dichotoma_M_contig2036.6502.1	7	1	1	0	0	0	11	2	1	6	2	1	29	164	56	191	212	70	181	140	64	44	64	112	86	166	75
mRNA_D-dichotoma_M_contig1932.5934.1	5	3	2	0	0	0	2	0	1	2	0	0	19	38	27	46	30	30	40	36	21	38	45	32	29	38	28
mRNA_D-dichotoma_M_contig1932.5939.1	4	1	0	2	0	0	16	8	6	6	1	6	39	54	75	82	45	37	50	34	23	27	81	45	54	62	59
mRNA_D-dichotoma_M_contig1934.5943.1	2	0	0	3	0	0	3	0	0	2	1	0	5	27	15	14	8	13	21	6	10	6	36	15	16	1	8
mRNA_D-dichotoma_M_contig1934.5944.1	0	0	0	0	0	0	0	0	0	0	0	0	0	5	8	6	1	3	0	3	1	1	5	0	5	3	9
mRNA_D-dichotoma_M_contig1934.5945.1	1	0	1	0	0	0	2	0	1	0	0	0	8	0	0	1	0	0	3	0	0	1	23	4	5	0	2
mRNA_D-dichotoma_M_contig1941.5985.1	0	0	0	4	0	0	1	0	0	1	0	0	2	5	2	3	11	1	7	3	0	1	2	4	7	2	3
mRNA_D-dichotoma_M_contig1941.5986.1	0	0	0	0	0	0	0	0	0	0	0	0	0	0	4	0	2	2	0	3	0	0	7	2	0	1	0
mRNA_D-dichotoma_M_contig1307.2378.1	0	0	0	124	165	43	1	0	0	1	1	0	1	54	8	34	7	1	9	6	0	0	0	59	23	20	2
mRNA_D-dichotoma_M_contig1309.2386.1	13	7	2	45	19	21	20	7	12	21	6	6	59	43	68	26	27	41	97	77	34	21	85	48	27	88	124
mRNA_D-dichotoma_M_contig1310.2409.1	3	0	4	24	1	19	6	4	4	4	1	1	0	11	4	3	5	0	11	5	0	0	18	12	5	9	28
mRNA_D-dichotoma_M_contig1310.2411.1	5	0	1	51	7	36	2	0	1	2	1	0	14	12	40	8	10	9	25	14	1	2	18	30	5	44	148
mRNA_D-dichotoma_M_contig1310.2412.1	3	3	4	38	7	47	9	1	1	2	0	0	1	9	12	3	20	5	10	3	10	2	12	19	1	19	51
mRNA_D-dichotoma_M_contig1310.2413.1	524	269	365	9	3	6	321	238	171	419	126	144	907	1345	2024	3243	935	2019	1611	1796	987	1252	784	1984	2247	1624	1766
mRNA_D-dichotoma_M_contig1311.2415.1	33	19	10	18	14	6	22	8	12	67	16	26	339	236	247	332	185	239	171	161	44	67	348	242	200	287	283
mRNA_D-dichotoma_M_contig1311.2426.1	9	3	6	706	57	379	53	7	11	9	1	3	9	51	136	44	14	8	105	52	16	6	27	51	16	121	223
mRNA_D-dichotoma_M_contig548.16120.1	42	26	21	3	2	0	38	27	20	29	17	19	488	465	650	976	709	456	724	668	629	471	1189	564	558	911	769
mRNA_D-dichotoma_M_contig548.16136.1	2	0	0	8	6	0	0	0	0	0	0	0	0	15	7	4	12	5	6	3	0	3	5	7	3	2	8
mRNA_D-dichotoma_M_contig548.16137.1	0	0	0	0	0	0	0	0	0	0	0	0	0	0	0	2	0	1	0	1	0	0	0	0	0	0	0
mRNA_D-dichotoma_M_contig549.16145.1	35	43	40	0	0	0	48	46	45	89	50	28	7081	2733	4028	10396	7624	5652	3968	6122	10356	11729	3887	2873	2339	5452	12689
mRNA_D-dichotoma_M_contig550.16167.1	105	51	29	1	2	1	150	33	19	90	27	36	111	239	258	219	256	162	250	246	43	68	420	228	151	134	123
mRNA_D-dichotoma_M_contig550.16172.1	3	1	2	0	0	0	33	1	3	8	4	7	315	423	565	381	254	138	549	576	27	44	416	359	266	166	89
mRNA_D-dichotoma_M_contig550.16173.1	7	0	2	0	3	1	24	1	0	17	2	8	326	372	461	296	244	154	552	544	6	19	448	398	217	120	80
mRNA_D-dichotoma_M_contig494.15164.1	3	0	0	2	0	0	4	0	1	2	0	0	0	0	0	0	0	0	0	0	0	0	0	2	0	2	0
mRNA_D-dichotoma_M_contig494.15165.1	0	0	0	0	0	0	1	0	0	0	0	0	0	0	0	0	0	0	1	0	0	0	0	0	0	0	0
mRNA_D-dichotoma_M_contig710.18013.1	618	287	287	23	4	14	528	176	203	332	96	123	7644	5986	9197	8985	5978	4473	6062	5694	2030	2696	7840	6418	6378	5949	4898
mRNA_D-dichotoma_M_contig712.18031.1	0	0	0	0	0	0	4	0	0	1	0	0	29	34	15	46	11	18	54	49	6	3	74	42	24	24	16
mRNA_D-dichotoma_M_contig4257.13783.1	62	6	2	73	27	29	121	12	17	121	13	15	3730	7415	6061	11910	8837	4835	6753	4923	2166	1622	8283	6387	4555	6171	3406
mRNA_D-dichotoma_M_contig4263.13801.1	0	0	0	3	0	0	0	0	0	3	0	0	9	32	2	8	15	11	15	1	2	1	14	21	22	11	9
mRNA_D-dichotoma_M_contig4274.13814.1	15	3	2	182	14	25	17	6	6	9	2	5	36	102	86	85	21	54	47	41	23	31	82	53	55	32	57
mRNA_D-dichotoma_M_contig4275.13816.1	0	0	0	3	0	1	0	1	0	2	0	0	54	56	46	124	41	28	66	45	16	21	97	90	63	56	44
mRNA_D-dichotoma_M_contig4283.13829.1	0	2	0	0	0	0	1	1	0	1	2	0	0	12	8	2	0	3	0	3	1	1	1	0	1	0	0
mRNA_D-dichotoma_M_contig4285.13834.1	15	2	4	0	0	0	13	2	3	7	0	1	152	137	242	152	219	131	230	231	68	58	373	210	176	132	76
mRNA_D-dichotoma_M_contig4285.13835.1	0	0	0	0	0	0	0	0	0	0	0	0	0	0	0	1	0	0	0	0	0	0	0	0	0	0	1
mRNA_D-dichotoma_M_contig2888.9960.1	3	0	0	1	1	0	5	1	0	6	1	0	0	0	0	0	0	0	0	3	0	0	10	0	0	0	0
mRNA_D-dichotoma_M_contig2893.9989.1	33	13	19	2	1	0	36	22	23	23	3	9	2000	770	2258	1093	943	644	1636	1317	338	359	1568	921	1154	920	502
mRNA_D-dichotoma_M_contig2893.9990.1	40	11	28	0	0	0	27	24	39	6	2	5	71	113	89	128	293	51	111	56	102	141	114	100	83	213	145
mRNA_D-dichotoma_M_contig2896.9993.1	0	0	0	12	12	13	0	0	0	0	1	0	0	0	0	0	0	0	0	0	0	0	0	0	0	0	0
mRNA_D-dichotoma_M_contig2898.9998.1	5	2	0	0	0	0	1	0	1	0	2	0	58	71	56	78	63	37	83	72	45	41	126	52	47	50	22
mRNA_D-dichotoma_M_contig2899.10000.1	9	8	7	0	0	3	9	3	1	5	0	4	4761	950	2541	994	1050	1234	987	987	465	970	1656	1151	1530	1611	1168
mRNA_D-dichotoma_M_contig569.16455.1	21	10	6	12	4	5	19	6	5	7	2	1	19	64	167	60	65	53	152	61	24	20	346	224	120	83	160
mRNA_D-dichotoma_M_contig571.16488.1	0	2	3	23	1	18	2	5	0	2	0	0	1	0	9	2	0	3	35	14	9	0	5	50	1	56	259
mRNA_D-dichotoma_M_contig571.16489.1	1	2	0	11	0	4	1	1	1	1	1	0	0	1	9	3	0	2	22	10	1	0	2	15	0	10	80
mRNA_D-dichotoma_M_contig571.16490.1	4	0	2	21	0	8	3	3	2	1	2	0	4	3	9	1	0	0	23	12	1	2	16	12	0	12	57
mRNA_D-dichotoma_M_contig571.16492.1	0	0	0	0	0	0	0	0	0	0	0	0	0	0	0	0	0	0	0	0	0	0	0	0	0	0	0
mRNA_D-dichotoma_M_contig2700.9333.1	9	3	2	0	0	0	12	3	11	13	4	4	90	67	272	56	44	64	396	231	35	27	281	170	94	62	65
mRNA_D-dichotoma_M_contig2700.9334.1	23	5	4	0	0	0	6	2	6	2	1	0	69	4	677	468	0	22	294	170	3	32	2	0	5	1	1
mRNA_D-dichotoma_M_contig2703.9337.1	0	0	0	0	0	0	0	0	0	0	0	0	0	0	0	0	0	0	0	0	0	0	0	0	0	0	0
mRNA_D-dichotoma_M_contig2703.9339.1	4	5	8	0	0	0	4	11	7	14	5	8	131	111	310	318	184	105	251	244	55	78	277	141	75	157	189
mRNA_D-dichotoma_M_contig2705.9347.1	2	1	1	14	7	1	3	0	1	8	0	0	0	0	0	0	0	0	0	0	0	0	0	0	0	4	0
mRNA_D-dichotoma_M_contig2706.9350.1	2	0	0	0	0	0	2	0	0	1	0	0	0	0	0	0	0	0	1	1	0	0	0	54	11	7	0
mRNA_D-dichotoma_M_contig2709.9357.1	13	3	7	0	0	0	13	0	4	2	0	0	0	0	0	0	0	0	3	3	0	0	0	0	0	0	0
mRNA_D-dichotoma_M_contig2710.9372.1	46	48	16	850	252	404	98	29	56	57	24	35	174	224	327	394	395	177	350	358	211	151	378	255	232	347	239
mRNA_D-dichotoma_M_contig2710.9373.1	6	23	4	363	86	148	23	10	21	32	11	7	100	72	221	114	81	56	161	151	34	32	148	106	43	80	81
mRNA_D-dichotoma_M_contig2710.9374.1	7	7	4	426	67	153	18	10	22	17	7	10	51	41	121	46	69	41	71	84	20	14	65	69	25	43	33
mRNA_D-dichotoma_M_contig2713.9382.1	0	0	0	143	34	124	0	0	0	2	0	1	0	7	4	2	0	5	0	3	1	0	12	38	8	101	342
mRNA_D-dichotoma_M_contig465.14589.1	16	4	4	22	0	3	8	0	4	4	0	0	11	6	12	5	5	0	26	13	2	0	11	11	3	6	21
mRNA_D-dichotoma_M_contig465.14590.1	1	0	0	16	0	11	1	0	0	0	0	0	0	3	4	3	0	0	10	3	4	0	2	7	2	4	19
mRNA_D-dichotoma_M_contig465.14591.1	65	42	44	1	0	0	61	40	39	50	20	20	1342	1790	3546	2252	1438	1070	2216	2179	394	510	1706	1987	1541	1239	656
mRNA_D-dichotoma_M_contig465.14596.1	169	117	154	2	1	0	124	132	112	101	33	62	471	1161	1313	1290	1251	782	1385	1119	624	668	1347	1060	1068	1256	707
mRNA_D-dichotoma_M_contig466.14604.1	5	0	0	2	0	0	2	0	0	6	0	0	8	3	8	0	0	1	1	1	1	1	3	5	5	1	0
mRNA_D-dichotoma_M_contig1287.2189.1	2	0	0	73	17	35	5	2	1	4	0	0	0	1	2	2	0	1	2	1	5	0	1	19	0	27	23
mRNA_D-dichotoma_M_contig1287.2192.1	3	4	1	0	0	0	17	7	4	5	2	0	1	54	31	11	29	5	48	18	7	4	46	19	40	25	11
mRNA_D-dichotoma_M_contig1287.2193.1	9	10	14	13	10	16	9	1	13	7	7	9	196	235	493	218	251	81	399	313	221	92	1024	227	273	266	397
mRNA_D-dichotoma_M_contig1289.2197.1	0	0	0	0	0	0	0	0	0	1	0	0	0	0	0	0	0	0	0	1	0	0	0	0	1	0	1
mRNA_D-dichotoma_M_contig1289.2200.1	4	0	0	528	0	1	7	0	0	19	0	0	0	1	0	8	0	3	0	0	2	2	0	1	2	5	3
mRNA_D-dichotoma_M_contig1289.2201.1	0	0	0	12	7	1	1	0	0	4	0	0	6	8	9	28	0	12	6	4	19	12	8	6	1	7	23
mRNA_D-dichotoma_M_contig1289.2202.1	0	0	0	0	0	0	0	0	0	0	0	0	0	7	0	1	0	1	4	5	0	0	0	0	0	1	1
mRNA_D-dichotoma_M_contig1289.2203.1	3	0	0	1	0	0	0	0	0	0	0	0	0	5	1	1	11	0	1	7	0	1	0	1	0	0	0
mRNA_D-dichotoma_M_contig1291.2224.1	3	2	1	0	0	0	27	3	2	19	4	7	91	89	53	20	16	43	24	12	38	41	52	141	70	38	22
mRNA_D-dichotoma_M_contig786.18691.1	0	0	0	0	0	0	0	0	0	0	0	0	0	0	0	3	1	0	1	0	0	0	0	1	7	2	2
mRNA_D-dichotoma_M_contig787.18695.1	59	61	28	0	1	3	127	52	61	91	23	48	358	699	778	1341	813	464	779	685	344	282	1208	622	750	970	482
mRNA_D-dichotoma_M_contig788.18698.1	0	0	0	0	0	0	0	0	0	0	0	0	0	1	1	3	1	9	6	4	2	3	4	3	3	2	1
mRNA_D-dichotoma_M_contig789.18701.1	0	0	0	0	0	0	2	0	0	0	0	1	483	102	476	187	238	202	370	439	33	67	472	238	275	177	170
mRNA_D-dichotoma_M_contig789.18710.1	0	0	0	1	0	0	0	0	0	0	0	0	9	7	7	0	0	1	0	0	0	0	1	0	0	0	1
mRNA_D-dichotoma_M_contig2547.8754.1	7	1	3	17	12	11	3	8	3	13	3	9	19	24	54	50	68	17	31	31	10	11	86	42	34	59	22
mRNA_D-dichotoma_M_contig2548.8762.1	0	0	0	2	0	0	0	0	0	2	2	3	0	13	10	2	0	3	2	0	0	1	4	0	1	1	1
mRNA_D-dichotoma_M_contig1328.2514.1	33	15	9	31	6	17	21	12	3	11	5	3	177	176	184	271	294	145	210	129	40	46	221	199	163	209	57
mRNA_D-dichotoma_M_contig1329.2517.1	3	2	4	0	0	1	7	5	20	13	3	2	8	3	15	21	1	6	39	35	13	6	63	2	8	2	6
mRNA_D-dichotoma_M_contig1329.2519.1	8	1	1	12	3	1	4	2	5	1	1	2	0	2	14	7	1	1	17	24	0	0	2	0	1	0	0
mRNA_D-dichotoma_M_contig1329.2525.1	15	15	24	37	29	54	19	19	12	36	11	8	1	6	50	46	28	19	53	56	5	19	13	9	2	6	12
mRNA_D-dichotoma_M_contig1330.2545.1	4	6	7	0	0	0	11	10	3	17	2	0	26	23	12	23	0	0	0	0	0	0	21	41	38	32	45
mRNA_D-dichotoma_M_contig2557.8792.1	0	0	0	0	0	0	0	0	0	0	0	0	2	0	0	0	0	0	0	0	0	0	0	0	0	0	0
mRNA_D-dichotoma_M_contig2557.8793.1	4	0	1	1	0	1	4	2	4	150	13	11	575	456	374	784	251	682	322	422	1585	1168	291	535	317	718	730
mRNA_D-dichotoma_M_contig2563.8814.1	0	0	0	0	0	0	1	0	0	0	0	0	0	0	0	0	0	0	0	0	0	0	0	0	0	0	0
mRNA_D-dichotoma_M_contig2563.8815.1	0	0	0	0	0	0	7	0	0	0	0	0	0	0	0	0	0	0	0	0	0	0	0	0	0	0	1
mRNA_D-dichotoma_M_contig2565.8819.1	0	2	0	0	0	0	2	0	1	1	0	1	56	124	62	66	29	51	130	136	25	31	65	67	34	52	35
mRNA_D-dichotoma_M_contig805.18910.1	58	11	26	1531	167	1157	168	19	7	102	19	19	1470	376	148	104	253	571	147	74	192	284	131	398	581	184	415
mRNA_D-dichotoma_M_contig806.18915.1	0	0	0	231	16	37	0	0	0	0	0	0	0	0	0	0	0	0	0	1	0	0	0	0	0	0	0
mRNA_D-dichotoma_M_contig857.19340.1	153	75	86	1	2	2	211	74	68	209	78	94	4525	2573	5518	5825	3432	3745	3441	3552	3623	3405	3089	3051	3774	3841	3202
mRNA_D-dichotoma_M_contig857.19343.1	18	6	10	4	2	1	10	2	7	9	7	8	41	81	297	42	26	19	273	170	48	30	574	61	67	54	70
mRNA_D-dichotoma_M_contig857.19344.1	1	1	3	10	4	0	3	2	1	4	1	3	12	23	65	26	58	3	76	42	10	2	212	19	20	23	28
mRNA_D-dichotoma_M_contig858.19352.1	0	0	0	13	0	16	0	0	0	0	0	0	94	271	228	156	164	16	26	15	29	25	164	45	270	551	223
mRNA_D-dichotoma_M_contig858.19354.1	552	205	309	557	43	360	235	169	151	209	60	113	6621	4102	6345	6804	5216	4209	4653	4795	4310	4890	5599	4310	5119	5971	5542
mRNA_D-dichotoma_M_contig858.19357.1	27	4	14	0	0	4	53	10	6	13	3	2	3972	1066	2611	2187	2266	1181	1867	1767	355	729	2848	1539	1530	2028	1396
mRNA_D-dichotoma_M_contig860.19377.1	20	10	15	49	12	41	60	17	32	34	25	29	20	5	115	37	0	6	143	93	2	15	30	25	6	29	128
mRNA_D-dichotoma_M_contig860.19378.1	5	6	7	14	2	18	14	13	16	22	5	6	1	0	23	8	0	0	35	22	0	1	12	1	0	7	21
mRNA_D-dichotoma_M_contig860.19379.1	10	9	12	18	0	21	14	8	21	19	17	13	0	1	61	24	0	3	59	60	0	1	16	1	1	13	46
mRNA_D-dichotoma_M_contig860.19380.1	34	24	18	72	9	43	56	11	29	39	27	26	22	2	105	19	0	10	132	105	1	14	37	16	5	15	78
mRNA_D-dichotoma_M_contig860.19381.1	16	1	6	14	0	12	15	6	10	14	2	14	0	0	23	3	1	3	27	16	0	0	12	3	0	5	4
mRNA_D-dichotoma_M_contig1088.757.1	10	1	1	61	11	27	5	1	3	6	1	0	8	4	20	5	24	2	40	22	1	2	45	30	3	32	70
mRNA_D-dichotoma_M_contig1089.760.1	0	0	0	0	0	0	0	0	0	1	0	0	0	3	2	1	0	0	1	0	0	0	0	0	0	0	1
mRNA_D-dichotoma_M_contig1089.762.1	18	6	8	0	0	0	19	2	5	12	0	0	0	0	3	3	0	4	0	1	1	0	1	0	1	0	1
mRNA_D-dichotoma_M_contig1090.794.1	2	0	0	1	0	0	0	0	0	1	0	0	0	2	0	0	0	0	0	0	0	0	0	1	2	1	0
mRNA_D-dichotoma_M_contig1090.795.1	0	0	0	0	0	0	0	0	0	0	0	0	0	0	0	0	0	0	0	0	0	0	0	0	0	0	0
mRNA_D-dichotoma_M_contig1090.796.1	0	0	0	0	0	0	1	0	0	5	0	0	0	0	0	0	0	0	3	0	0	0	0	0	0	0	0
mRNA_D-dichotoma_M_contig1091.799.1	0	0	0	0	0	0	0	0	0	0	0	0	0	5	1	0	0	0	0	0	0	4	1	0	2	1	0
mRNA_D-dichotoma_M_contig1091.800.1	130	171	140	35	6	22	188	54	176	251	104	122	2278	2621	3622	5472	2879	1795	3757	3489	2836	2065	3894	3342	2293	4228	3906
mRNA_D-dichotoma_M_contig1091.801.1	8	20	11	4	1	5	10	9	25	30	13	24	590	295	954	990	494	283	664	756	328	200	682	416	254	764	596
mRNA_D-dichotoma_M_contig1091.802.1	4	7	27	6	2	3	3	9	32	23	17	27	425	268	956	1114	614	298	580	792	355	206	594	431	240	703	617
mRNA_D-dichotoma_M_contig1093.815.1	0	0	0	0	0	0	0	0	0	1	1	0	37	56	38	58	41	258	106	52	143	45	15	143	136	37	64
mRNA_D-dichotoma_M_contig3721.12464.1	0	0	0	0	0	0	0	0	0	0	0	0	6	5	11	0	4	0	5	1	5	0	5	0	0	7	6
mRNA_D-dichotoma_M_contig3723.12466.1	0	0	0	0	0	0	1	0	1	7	0	1	0	0	0	0	0	1	0	0	0	0	0	0	0	1	0
mRNA_D-dichotoma_M_contig3724.12467.1	0	0	0	0	0	0	1	0	0	0	0	0	18	24	10	17	1	10	20	17	8	1	28	25	22	1	9
mRNA_D-dichotoma_M_contig3726.12469.1	1	5	2	1	0	0	11	0	0	1	8	0	13	59	41	24	78	12	21	16	63	25	5	6	6	5	14
mRNA_D-dichotoma_M_contig3730.12481.1	0	0	0	0	0	0	0	0	0	0	0	0	10	23	2	9	9	2	7	2	0	1	8	15	2	4	3
mRNA_D-dichotoma_M_contig3736.12489.1	0	0	0	0	0	0	0	0	0	0	0	0	20	76	38	60	197	13	8	0	0	0	35	79	52	29	17
mRNA_D-dichotoma_M_contig3736.12490.1	1	3	0	0	0	0	0	0	0	2	0	0	8	23	7	21	21	9	16	14	8	7	22	22	11	25	17
mRNA_D-dichotoma_M_contig3736.12491.1	1	0	0	0	0	0	0	0	0	3	0	0	7	29	18	11	11	7	4	10	3	6	31	17	11	7	4
mRNA_D-dichotoma_M_contig3738.12492.1	240	77	167	31	7	3	89	156	131	47	26	44	8157	1816	6771	6717	5379	4098	3748	4986	1521	2442	4698	3544	4225	4994	3010
mRNA_D-dichotoma_M_contig2255.7554.1	55	26	16	0	0	0	118	5	18	49	11	15	0	23	10	9	6	9	24	10	21	4	14	1	5	5	3
mRNA_D-dichotoma_M_contig2255.7555.1	23	7	5	0	0	0	34	4	2	20	5	8	0	11	14	35	12	0	18	8	23	7	6	4	4	3	1
mRNA_D-dichotoma_M_contig2255.7557.1	4	0	1	0	0	0	4	0	1	8	2	3	24	63	54	83	95	49	40	31	123	95	20	26	34	43	80
mRNA_D-dichotoma_M_contig2264.7593.1	0	0	0	1	0	0	0	0	0	0	0	0	0	0	0	0	0	0	0	0	0	0	3	1	0	0	0
mRNA_D-dichotoma_M_contig2019.6406.1	2	0	0	268	30	154	4	0	1	0	0	0	0	0	4	0	0	0	3	4	6	0	13	47	0	125	76
mRNA_D-dichotoma_M_contig2020.6424.1	15	14	13	0	0	0	11	19	3	9	4	3	4001	2668	308	894	679	1689	3200	2268	593	1539	5324	3437	3491	2128	2125
mRNA_D-dichotoma_M_contig2023.6436.1	0	0	0	0	0	0	0	0	0	0	0	0	0	0	0	0	0	0	0	0	0	0	0	0	0	0	0
mRNA_D-dichotoma_M_contig2023.6437.1	0	0	0	0	0	0	0	0	0	0	0	0	0	3	1	1	6	1	1	0	0	1	0	2	0	0	0
mRNA_D-dichotoma_M_contig2027.6447.1	2941	1475	2118	3	0	5	1753	3214	3737	995	378	504	7356	7650	4982	8873	22814	7856	9147	4718	3840	6473	22114	9165	17220	17225	8692
mRNA_D-dichotoma_M_contig286.9860.1	1	0	0	0	0	0	0	0	0	0	0	1	1	0	0	0	0	1	0	0	0	0	1	1	1	1	4
mRNA_D-dichotoma_M_contig3573.12045.1	2	0	0	19	0	0	0	0	0	0	0	0	6	13	4	3	22	0	9	3	0	1	1	0	1	0	0
mRNA_D-dichotoma_M_contig3574.12046.1	0	0	0	0	0	0	0	0	0	2	0	0	140	19	32	92	40	35	110	117	5	10	154	80	67	53	22
mRNA_D-dichotoma_M_contig3574.12047.1	0	0	0	0	0	0	1	0	0	0	0	0	27	12	3	12	16	15	43	39	0	1	45	11	25	18	6
mRNA_D-dichotoma_M_contig3577.12052.1	1297	791	651	3	1	3	1197	741	431	1059	283	538	72	175	350	118	167	146	546	449	191	196	256	75	62	60	137
mRNA_D-dichotoma_M_contig3579.12054.1	1	0	0	0	0	0	11	1	0	10	1	0	127	83	48	67	56	40	94	62	14	12	310	100	100	58	26
mRNA_D-dichotoma_M_contig1083.712.1	0	0	0	0	1	0	0	0	0	0	0	0	0	0	0	1	0	0	0	0	0	0	0	0	1	0	0
mRNA_D-dichotoma_M_contig1085.731.1	3	1	1	537	52	169	7	0	3	5	1	0	11	1	14	2	0	0	14	7	0	3	9	5	3	7	6
mRNA_D-dichotoma_M_contig1085.734.1	30	33	25	260	92	167	38	19	40	105	51	78	2501	1293	2481	3951	2181	1361	2076	2596	730	846	2510	1920	1540	2335	1694
mRNA_D-dichotoma_M_contig1086.736.1	0	1	0	0	0	0	0	0	1	6	0	0	17	23	41	12	0	0	10	7	0	0	7	9	4	3	0
mRNA_D-dichotoma_M_contig1086.737.1	3	0	0	1	0	0	2	0	0	6	0	0	7	12	10	7	0	2	1	3	4	1	9	5	4	9	5
mRNA_D-dichotoma_M_contig2302.7802.1	0	0	0	0	0	0	0	0	0	0	0	0	0	0	0	0	0	0	0	0	0	0	0	0	0	0	0
mRNA_D-dichotoma_M_contig2304.7806.1	0	0	0	0	0	0	2	0	0	0	0	0	4	11	7	1	13	2	15	16	3	2	17	22	40	10	7
mRNA_D-dichotoma_M_contig2305.7807.1	9	7	1	0	0	0	31	5	15	8	1	4	0	0	0	0	0	3	0	0	0	1	0	0	0	2	1
mRNA_D-dichotoma_M_contig2307.7809.1	3	7	3	0	1	0	3	9	17	2	8	5	5	7	5	19	18	6	9	5	12	3	17	13	1	15	44
mRNA_D-dichotoma_M_contig160.4188.1	210	13	161	1	0	0	41	21	55	13	6	2	956	750	6121	1845	1291	295	3185	1775	699	450	740	131	188	260	323
mRNA_D-dichotoma_M_contig160.4189.1	41	16	41	540	149	246	28	19	32	61	33	46	1875	1575	1851	4882	2340	2043	3252	3940	1372	1568	2682	2071	1850	2518	2644
mRNA_D-dichotoma_M_contig160.4196.1	96	42	70	2	0	0	194	94	119	518	211	217	336	208	649	452	311	82	107	75	69	92	1497	164	299	428	267
mRNA_D-dichotoma_M_contig201.6368.1	0	0	0	0	0	0	2	0	0	6	0	1	76	28	2	6	4	16	1	4	17	22	114	113	44	62	66
mRNA_D-dichotoma_M_contig201.6369.1	1	0	0	1	0	0	0	0	0	5	0	0	361	27	3	9	10	48	43	20	42	43	193	211	99	95	116
mRNA_D-dichotoma_M_contig201.6375.1	18	15	8	31	11	29	22	23	24	58	23	16	1019	906	870	2091	1343	910	1073	1091	244	495	1726	1317	1408	2035	1389
mRNA_D-dichotoma_M_contig201.6381.1	125	68	91	0	0	0	85	101	71	34	26	25	3193	964	3552	3047	4403	1108	1961	1263	530	704	3136	1353	2563	3455	1243
mRNA_D-dichotoma_M_contig362.12184.1	1	1	5	0	0	0	2	2	3	7	0	0	244	416	334	466	214	266	394	361	29	54	518	448	310	266	94
mRNA_D-dichotoma_M_contig362.12186.1	20	4	2	1	0	0	8	1	4	5	0	2	8	20	7	5	0	6	29	10	1	3	17	55	48	5	11
mRNA_D-dichotoma_M_contig364.12231.1	7	9	7	0	0	0	3	11	13	12	11	26	120	88	224	280	233	106	216	263	60	47	325	132	92	168	119
mRNA_D-dichotoma_M_contig142.3079.1	1	0	0	0	0	0	3	0	0	1	0	0	0	6	2	2	0	3	0	1	2	6	5	6	8	5	6
mRNA_D-dichotoma_M_contig142.3082.1	831	542	777	13	1	7	500	446	202	1022	430	553	6705	4770	5502	7890	5731	5507	13047	14367	4503	5202	13600	7889	5548	5690	5583
mRNA_D-dichotoma_M_contig142.3083.1	0	0	0	0	0	0	3	0	0	0	0	0	4	13	0	13	0	1	7	12	0	8	5	18	4	5	0
mRNA_D-dichotoma_M_contig143.3136.1	2	2	3	1	0	0	8	0	0	1	0	0	58	29	266	36	0	3	7	9	1	0	13	3	0	0	2
mRNA_D-dichotoma_M_contig143.3145.1	0	0	0	59	21	21	0	0	0	1	0	0	7	18	24	30	22	1	3	6	0	4	4	57	38	14	28
mRNA_D-dichotoma_M_contig143.3147.1	153	48	90	2123	177	1567	83	27	75	43	7	14	8809	3978	7119	7825	6278	3347	5059	4366	1657	2577	6323	5018	4641	7208	5480
mRNA_D-dichotoma_M_contig80.18868.1	0	0	1	0	0	0	0	0	2	1	0	0	0	3	0	0	0	1	8	6	0	2	4	24	11	2	1
mRNA_D-dichotoma_M_contig176.5075.1	18	4	14	956	57	324	12	10	8	5	2	7	9	47	181	37	27	11	102	58	6	9	90	89	21	81	222
mRNA_D-dichotoma_M_contig176.5085.1	2	1	0	3	6	2	4	0	1	0	0	0	0	1	0	0	0	1	1	2	0	0	0	8	0	0	0
mRNA_D-dichotoma_M_contig177.5116.1	0	0	0	34	4	12	0	0	0	28	5	5	147	139	248	210	127	0	7	2	0	0	724	201	147	197	246
mRNA_D-dichotoma_M_contig177.5118.1	0	0	0	21	9	8	0	0	0	38	10	7	494	531	402	371	273	1	6	6	0	0	1502	835	577	466	573
mRNA_D-dichotoma_M_contig177.5119.1	0	0	0	1	0	1	0	1	0	3	1	1	34	35	34	16	28	1	3	3	0	0	70	89	75	37	48
mRNA_D-dichotoma_M_contig177.5120.1	0	3	0	0	2	2	6	0	2	6	1	3	77	79	68	60	99	8	30	19	7	21	133	150	121	106	53
mRNA_D-dichotoma_M_contig177.5124.1	0	0	0	3	8	2	0	0	0	4	2	0	583	451	781	609	439	0	1	3	0	0	1311	979	1071	820	718
mRNA_D-dichotoma_M_contig177.5125.1	0	0	0	11	4	0	0	0	0	14	4	4	284	253	162	261	143	1	1	5	0	0	969	549	500	387	199
mRNA_D-dichotoma_M_contig178.5167.1	24	8	13	11	2	1	49	10	6	33	10	14	422	213	202	250	184	209	552	395	109	79	625	569	349	426	218
mRNA_D-dichotoma_M_contig178.5170.1	0	0	0	0	0	0	0	0	1	1	0	0	5	15	9	8	9	6	15	8	3	4	6	26	2	2	10
mRNA_D-dichotoma_M_contig178.5171.1	0	0	0	1	0	0	3	0	0	3	0	0	6	17	1	7	2	0	2	3	0	1	34	15	5	3	5
mRNA_D-dichotoma_M_contig1788.5196.1	0	0	0	0	0	0	0	0	0	1	0	0	0	0	0	0	0	0	0	0	0	0	0	0	0	0	0
mRNA_D-dichotoma_M_contig1789.5197.1	3	1	3	1	0	0	7	0	0	4	0	3	31	148	67	90	139	52	139	123	25	35	123	269	135	61	77
mRNA_D-dichotoma_M_contig1789.5198.1	3	4	6	14	9	28	1	0	3	8	0	0	16	13	17	26	27	10	77	45	2	3	42	102	15	134	434
mRNA_D-dichotoma_M_contig1789.5199.1	50	36	31	3	1	1	24	28	22	17	4	15	1385	721	1385	1430	1322	1224	1196	1327	613	726	1350	1180	1162	905	861
mRNA_D-dichotoma_M_contig1792.5216.1	0	0	0	0	0	0	0	1	1	2	1	0	2	4	24	15	7	4	4	6	2	2	45	4	6	15	6
mRNA_D-dichotoma_M_contig1793.5219.1	385	98	128	245	13	90	235	78	55	206	27	26	2786	5848	3430	3718	3221	3518	4900	3658	2098	2611	5320	5596	4227	2354	2365
mRNA_D-dichotoma_M_contig511.15512.1	0	0	0	0	0	0	3	1	2	3	1	1	86	126	157	110	34	48	225	123	47	30	189	130	77	95	47
mRNA_D-dichotoma_M_contig511.15517.1	0	0	0	0	0	0	0	0	0	0	0	0	0	0	1	8	0	0	0	0	0	0	0	0	2	6	1
mRNA_D-dichotoma_M_contig511.15522.1	168	129	107	1	23	3	96	147	152	97	36	76	1020	2065	2407	2052	1668	1339	2489	1769	797	865	2090	1931	1819	1432	772
mRNA_D-dichotoma_M_contig512.15532.1	0	0	0	0	0	0	0	0	0	0	0	0	1	0	0	0	0	0	0	1	0	0	1	0	1	1	1
mRNA_D-dichotoma_M_contig512.15533.1	0	0	0	0	0	0	0	0	0	0	0	0	13	1	1	0	0	1	2	9	0	0	13	5	3	5	0
mRNA_D-dichotoma_M_contig512.15538.1	0	1	0	0	1	0	0	0	0	4	1	0	44	28	53	63	36	27	65	58	9	3	31	35	11	12	6
mRNA_D-dichotoma_M_contig513.15545.1	18	18	12	4	0	4	14	15	21	16	5	4	187	111	218	169	147	157	188	204	113	100	273	298	150	188	149
mRNA_D-dichotoma_M_contig513.15546.1	12	0	5	1	0	3	5	1	11	3	2	3	83	28	165	62	57	42	40	45	53	29	64	59	63	59	48
mRNA_D-dichotoma_M_contig513.15548.1	12	7	9	6	0	7	14	1	9	33	8	5	24	344	222	145	185	72	173	95	6	27	38	88	26	41	78
mRNA_D-dichotoma_M_contig3652.12269.1	51	48	32	0	0	0	43	19	14	13	3	12	703	248	695	377	255	140	550	533	92	75	258	397	238	164	153
mRNA_D-dichotoma_M_contig3662.12296.1	27	18	18	1	0	0	42	23	44	26	10	22	1281	457	1515	836	769	490	666	678	394	355	848	647	664	563	582
mRNA_D-dichotoma_M_contig3663.12298.1	1	0	0	0	0	0	5	0	0	2	0	0	0	4	6	1	0	4	135	68	0	1	4	4	2	1	0
mRNA_D-dichotoma_M_contig3668.12305.1	0	0	0	0	0	0	0	0	0	0	0	0	0	2	0	0	0	0	1	0	0	0	0	0	0	0	0
mRNA_D-dichotoma_M_contig3668.12306.1	3	0	0	0	0	0	7	0	0	10	0	0	0	0	0	0	0	0	3	3	0	0	2	7	7	5	1
mRNA_D-dichotoma_M_contig3668.12307.1	0	0	0	0	0	0	0	0	0	0	0	0	0	0	0	0	0	0	0	0	0	0	0	0	0	0	0
mRNA_D-dichotoma_M_contig3669.12308.1	42	12	32	3	0	0	80	37	32	23	6	4	1301	750	2165	1256	1455	793	1803	1675	1066	706	1377	945	1056	898	1491
mRNA_D-dichotoma_M_contig3672.12311.1	0	0	0	2	0	0	3	0	0	0	0	0	0	1	6	1	11	6	5	5	2	7	2	30	12	21	1
mRNA_D-dichotoma_M_contig36.12107.1	25	9	12	0	0	0	16	3	10	10	0	2	23	27	61	30	55	11	79	30	6	4	29	21	13	18	11
mRNA_D-dichotoma_M_contig36.12119.1	26	7	11	14	0	11	30	10	16	50	24	36	1953	1479	1748	2631	1796	1299	1553	1806	1594	1592	1998	1740	1804	1733	2102
mRNA_D-dichotoma_M_contig37.12403.1	2	0	0	0	0	0	22	1	1	10	1	1	226	90	364	56	24	78	335	421	7	7	8	0	8	3	2
mRNA_D-dichotoma_M_contig137.2749.1	0	0	0	0	0	0	0	0	0	0	0	0	0	0	0	0	0	0	0	0	0	0	0	0	0	0	0
mRNA_D-dichotoma_M_contig138.2795.1	114	56	58	90	26	40	119	61	56	147	54	82	972	539	1010	718	629	788	1188	1151	907	776	859	689	1146	932	947
mRNA_D-dichotoma_M_contig138.2801.1	35	6	29	0	0	0	17	13	12	10	1	1	2890	3870	4736	6567	4314	2378	5428	5249	2193	1810	5467	4452	3036	3247	2257
mRNA_D-dichotoma_M_contig138.2804.1	0	0	0	0	0	0	5	0	0	0	0	0	15	16	32	20	47	10	17	15	15	14	45	24	25	32	27
mRNA_D-dichotoma_M_contig139.2867.1	0	0	0	15	4	1	3	0	0	8	0	0	12	73	17	17	4	14	53	41	14	8	80	86	12	28	38
mRNA_D-dichotoma_M_contig139.2868.1	10	0	0	25	3	2	13	3	0	25	0	1	24	22	26	33	4	16	28	17	27	5	22	17	12	10	31
mRNA_D-dichotoma_M_contig139.2870.1	0	0	0	15	0	0	0	0	0	0	0	0	0	0	0	0	0	0	2	0	1	0	0	0	0	0	2
mRNA_D-dichotoma_M_contig139.2872.1	1	0	1	0	0	0	4	0	0	0	0	0	0	0	0	0	0	0	0	0	0	0	0	4	0	0	2
mRNA_D-dichotoma_M_contig139.2873.1	0	0	2	11	7	3	4	0	0	0	0	0	0	0	1	0	0	0	0	0	0	0	0	0	0	0	0
mRNA_D-dichotoma_M_contig4902.15103.1	0	0	0	1	0	0	8	0	0	3	0	0	0	7	3	1	21	1	4	4	4	4	1	2	7	1	4
mRNA_D-dichotoma_M_contig4905.15105.1	2	0	0	8	0	3	9	0	0	2	0	2	0	0	0	0	0	1	1	2	0	0	1	0	1	0	1
mRNA_D-dichotoma_M_contig4910.15115.1	0	0	0	0	0	0	0	0	0	0	0	0	7	9	5	6	0	2	4	6	0	2	4	17	10	2	2
mRNA_D-dichotoma_M_contig4910.15117.1	0	0	0	0	0	0	2	0	0	0	0	0	6	2	5	10	3	13	14	20	3	3	6	6	8	2	4
mRNA_D-dichotoma_M_contig4914.15122.1	26	4	1	233	21	27	8	1	2	50	10	4	683	1290	850	1075	1031	714	1960	1247	42	68	2707	1094	887	511	336
mRNA_D-dichotoma_M_contig4914.15123.1	1	0	0	77	0	0	4	0	0	16	0	0	119	121	140	71	56	52	161	80	3	19	104	107	119	32	27
mRNA_D-dichotoma_M_contig4914.15124.1	0	1	0	0	0	0	4	0	0	0	1	0	50	162	95	64	27	21	207	186	2	14	83	72	63	27	15
mRNA_D-dichotoma_M_contig4916.15127.1	0	0	0	0	0	0	0	0	0	0	0	0	3	5	2	0	0	0	0	0	0	0	0	0	0	0	0
mRNA_D-dichotoma_M_contig4918.15130.1	10	6	7	0	0	0	4	17	7	33	16	7	67	15	277	62	14	66	88	63	21	20	56	16	41	34	51
mRNA_D-dichotoma_M_contig4919.15131.1	0	0	0	0	0	0	0	0	0	0	0	0	0	0	0	0	0	0	0	0	0	0	0	0	0	0	0
mRNA_D-dichotoma_M_contig4934.15150.1	0	0	0	0	0	0	0	0	0	0	0	0	0	0	0	0	0	0	0	0	0	0	0	0	0	0	0
mRNA_D-dichotoma_M_contig4934.15152.1	21	1	8	360	11	83	6	1	1	0	0	0	10	1	554	104	0	29	899	380	8	46	3	7	0	42	72
mRNA_D-dichotoma_M_contig4936.15157.1	1	7	0	27	0	17	3	9	0	18	13	7	3355	6357	2947	3977	3175	3557	4	27	647	901	5607	5440	5459	3573	1868
mRNA_D-dichotoma_M_contig4936.15159.1	1	0	0	15	0	0	3	0	0	13	0	0	42	53	71	134	175	38	90	87	54	36	82	88	59	38	43
mRNA_D-dichotoma_M_contig4034.13245.1	1	0	2	0	0	0	5	2	2	5	0	1	0	0	3	1	0	5	63	63	0	0	1	1	2	0	1
mRNA_D-dichotoma_M_contig4036.13249.1	1	0	0	3	0	1	1	0	0	28	7	3	821	751	270	439	476	658	250	173	1650	1212	498	611	439	304	2574
mRNA_D-dichotoma_M_contig4036.13250.1	1	0	1	6	2	0	3	0	0	43	13	8	969	816	413	330	412	921	272	381	818	787	746	755	620	356	2387
mRNA_D-dichotoma_M_contig4039.13254.1	0	0	0	0	0	0	0	0	0	0	0	0	0	1	0	4	0	0	0	1	0	2	4	5	2	0	0
mRNA_D-dichotoma_M_contig4043.13269.1	86	9	19	3	2	2	100	12	7	90	5	10	6	2	0	1	0	4	17	7	0	1	2	3	4	11	0
mRNA_D-dichotoma_M_contig4045.13273.1	0	0	0	0	0	0	0	0	0	12	5	6	100	62	17	35	59	43	65	60	52	150	116	20	77	66	148
mRNA_D-dichotoma_M_contig1754.5059.1	54	46	41	0	0	2	38	22	38	26	20	17	237	346	354	834	365	334	448	510	254	350	363	287	241	501	461
mRNA_D-dichotoma_M_contig13.2281.1	420	153	164	17	5	16	653	122	125	352	72	76	249	799	467	569	521	339	654	377	274	334	923	633	456	373	398
mRNA_D-dichotoma_M_contig13.2294.1	4	1	0	0	0	0	7	0	6	16	7	5	31	11	28	25	21	30	44	40	6	6	33	30	35	22	15
mRNA_D-dichotoma_M_contig13.2325.1	4	2	0	59	11	20	4	0	0	28	7	13	136	61	135	99	18	60	122	64	13	30	235	90	93	94	70
mRNA_D-dichotoma_M_contig93.20039.1	1	0	0	0	0	0	0	0	0	0	0	1	0	0	0	0	0	0	0	0	0	0	0	1	0	2	0
mRNA_D-dichotoma_M_contig94.20124.1	55	29	38	3	0	0	131	57	74	300	122	129	1144	1051	2301	1776	1098	569	981	995	665	476	1597	1016	904	1079	1059
mRNA_D-dichotoma_M_contig94.20127.1	0	0	0	0	0	0	0	0	0	1	1	0	0	0	0	0	0	0	0	0	0	0	0	0	0	0	0
mRNA_D-dichotoma_M_contig94.20130.1	32	2	12	38	7	14	63	2	5	10	2	7	72	72	670	155	37	66	928	488	68	93	256	375	62	160	774
mRNA_D-dichotoma_M_contig94.20137.1	0	0	0	11	1	7	0	0	0	1	0	0	4	23	17	12	14	6	6	10	0	0	29	35	11	11	6
mRNA_D-dichotoma_M_contig772.18584.1	0	0	0	0	3	0	0	0	0	0	0	0	0	1	0	0	0	0	0	0	0	0	1	0	0	0	0
mRNA_D-dichotoma_M_contig772.18585.1	0	0	0	1	0	0	0	0	0	0	0	0	0	0	0	0	0	0	0	1	0	0	0	0	2	0	0
mRNA_D-dichotoma_M_contig773.18594.1	0	0	0	31	6	18	0	0	2	0	0	0	16	5	7	3	6	5	7	2	27	14	4	7	3	26	21
mRNA_D-dichotoma_M_contig774.18602.1	0	0	0	0	0	1	0	1	0	3	0	0	143	89	126	84	106	33	48	59	4	23	121	94	63	58	24
mRNA_D-dichotoma_M_contig628.17182.1	14	6	3	4	3	2	38	7	9	52	17	19	653	255	796	518	418	264	433	520	551	321	720	308	375	379	773
mRNA_D-dichotoma_M_contig629.17184.1	0	0	0	0	0	0	0	0	0	0	0	0	3	10	8	4	0	6	5	13	2	1	2	15	1	5	1
mRNA_D-dichotoma_M_contig629.17188.1	7	3	6	2	0	4	5	7	8	3	3	1	1317	175	1165	1235	850	329	424	398	260	382	790	399	327	683	859
mRNA_D-dichotoma_M_contig629.17190.1	0	0	0	0	0	0	0	0	0	0	0	0	0	0	0	0	0	0	0	0	0	0	2	0	1	0	2
mRNA_D-dichotoma_M_contig629.17191.1	0	0	0	2	0	0	0	0	0	0	0	0	0	0	2	0	0	0	1	2	0	0	13	3	6	5	1
mRNA_D-dichotoma_M_contig629.17195.1	0	0	0	0	0	0	0	0	0	0	0	0	19	8	6	5	0	0	0	0	0	0	48	85	64	13	16
mRNA_D-dichotoma_M_contig629.17196.1	0	0	0	0	0	0	1	0	0	0	0	0	31	2	6	3	0	0	0	0	0	0	35	95	37	14	9
mRNA_D-dichotoma_M_contig629.17197.1	1	0	0	0	0	0	2	0	0	6	2	0	180	297	81	401	75	22	50	57	23	10	1334	1037	589	631	329
mRNA_D-dichotoma_M_contig630.17234.1	0	0	0	0	0	0	0	0	0	0	0	0	0	0	0	1	0	0	0	0	0	0	0	0	0	0	1
mRNA_D-dichotoma_M_contig630.17238.1	1	0	0	0	0	0	4	3	1	1	0	1	39	128	101	104	168	54	70	37	15	25	219	94	73	104	41
mRNA_D-dichotoma_M_contig630.17241.1	0	0	0	42	0	1	1	0	0	4	0	0	0	1	3	0	0	0	0	0	2	3	0	0	1	0	0
mRNA_D-dichotoma_M_contig631.17248.1	8	2	1	12	31	1	3	0	0	2	0	0	0	0	0	0	0	0	0	1	0	0	0	0	1	0	0
mRNA_D-dichotoma_M_contig631.17249.1	1	0	0	16	19	1	0	0	0	9	0	0	0	0	0	0	0	0	0	0	1	0	0	0	0	0	0
mRNA_D-dichotoma_M_contig631.17250.1	40	3	14	54	24	3	41	2	0	18	0	1	0	0	0	0	0	0	0	0	0	0	0	0	0	0	0
mRNA_D-dichotoma_M_contig631.17251.1	0	0	0	17	6	0	2	0	0	10	0	0	0	0	0	0	0	0	0	0	0	0	0	0	1	0	0
mRNA_D-dichotoma_M_contig3323.11413.1	0	1	0	10	8	7	1	0	0	3	0	0	0	32	21	46	49	18	39	11	7	3	31	111	54	52	9
mRNA_D-dichotoma_M_contig3324.11415.1	0	1	3	0	0	0	0	0	3	2	0	3	18	20	9	37	2	15	13	8	27	8	25	15	20	6	14
mRNA_D-dichotoma_M_contig3331.11438.1	8	17	11	69	15	28	32	14	7	20	3	8	31	39	40	45	42	43	71	66	10	3	88	31	54	45	16
mRNA_D-dichotoma_M_contig1205.1660.1	0	0	0	0	0	0	0	0	0	0	0	0	0	0	0	0	0	0	0	0	0	0	0	0	0	0	0
mRNA_D-dichotoma_M_contig1205.1663.1	0	0	0	0	0	0	0	0	0	0	0	0	2	4	3	1	1	1	1	2	1	1	1	2	0	2	0
mRNA_D-dichotoma_M_contig1206.1667.1	1	2	0	1	0	0	0	0	2	4	3	2	18	47	58	44	27	15	41	46	4	10	43	38	21	25	137
mRNA_D-dichotoma_M_contig1208.1683.1	86	36	46	0	0	0	161	27	31	48	24	20	1789	2443	7552	2486	1821	1550	2762	1724	806	1209	1662	2168	2150	1472	1078
mRNA_D-dichotoma_M_contig1210.1702.1	144	116	111	0	0	0	127	77	56	301	123	140	726	339	1251	1146	1015	394	862	790	515	463	804	382	459	601	860
mRNA_D-dichotoma_M_contig902.19788.1	2	1	0	0	0	1	7	0	0	45	17	26	74	91	101	34	148	23	19	11	28	16	136	17	28	22	51
mRNA_D-dichotoma_M_contig903.19792.1	1	0	1	534	94	165	0	0	0	4	1	1	24	45	65	104	64	30	73	100	22	7	144	33	19	43	40
mRNA_D-dichotoma_M_contig903.19794.1	7	2	5	1589	554	1077	6	9	9	6	12	8	265	151	266	550	392	133	230	345	127	43	370	125	57	235	235
mRNA_D-dichotoma_M_contig903.19796.1	16	16	26	3095	1552	2168	18	14	31	30	18	22	994	977	915	2802	1296	1088	1378	1728	1216	1150	1605	1545	954	2269	1964
mRNA_D-dichotoma_M_contig904.19801.1	5	4	0	0	0	0	11	0	2	10	2	2	1	1	5	2	10	3	9	3	4	6	10	12	9	5	9
mRNA_D-dichotoma_M_contig2997.10340.1	0	0	0	1	2	0	0	0	0	0	0	0	0	0	0	0	0	0	0	0	0	0	0	0	0	0	0
mRNA_D-dichotoma_M_contig2997.10341.1	0	0	0	0	0	0	0	0	0	0	0	0	0	0	0	0	0	0	1	0	0	0	0	0	0	0	0
mRNA_D-dichotoma_M_contig3008.10440.1	0	0	0	0	0	0	0	0	0	0	0	0	0	0	0	0	0	0	1	0	0	0	0	0	0	0	0
mRNA_D-dichotoma_M_contig3009.10441.1	18	28	17	0	0	0	151	203	206	1217	430	480	7113	1743	1073	1175	3947	2997	127	105	1867	3583	1630	1396	1484	2075	6963
mRNA_D-dichotoma_M_contig3009.10442.1	26	19	7	0	0	0	41	28	47	90	34	28	106	65	25	41	74	130	26	33	68	120	45	101	103	106	70
mRNA_D-dichotoma_M_contig460.14515.1	66	42	32	0	0	0	60	27	17	293	50	99	542	4735	905	8030	3229	3861	781	706	385	1219	1006	4061	3304	2695	958
mRNA_D-dichotoma_M_contig460.14516.1	9	4	7	0	0	0	18	11	7	17	5	1	156	217	254	569	344	191	246	315	20	46	314	361	165	156	70
mRNA_D-dichotoma_M_contig461.14536.1	3	0	0	1757	249	565	6	1	0	10	1	4	16	8	10	18	21	23	8	1	46	19	3	80	45	23	10
mRNA_D-dichotoma_M_contig462.14551.1	264	102	115	1	1	0	234	88	95	70	20	46	6191	2199	4739	2904	1665	1882	2658	2381	954	1080	2785	2755	2776	2001	1215
mRNA_D-dichotoma_M_contig22.7309.1	78	43	41	209	50	173	115	38	45	138	63	80	3294	2213	3896	4165	2685	2449	2658	2851	1011	1738	3068	2872	3143	3198	1909
mRNA_D-dichotoma_M_contig22.7310.1	2	2	0	2	2	0	2	0	0	0	1	0	5	7	41	24	4	1	2	2	0	0	59	179	118	72	23
mRNA_D-dichotoma_M_contig22.7315.1	113	133	73	0	0	2	100	46	73	213	97	51	1071	1717	1497	3035	2252	1329	1975	2057	949	1016	1604	1718	1325	1825	1324
mRNA_D-dichotoma_M_contig22.7317.1	4	1	2	0	1	0	7	1	1	4	1	2	315	297	453	424	518	200	335	279	125	169	441	240	258	616	266
mRNA_D-dichotoma_M_contig22.7322.1	0	0	1	91	18	73	0	0	0	2	0	3	0	0	0	0	0	0	0	0	0	0	1	88	2	255	620
mRNA_D-dichotoma_M_contig22.7333.1	0	0	0	0	0	0	0	0	0	0	0	0	0	0	0	0	0	0	0	0	0	0	0	0	0	0	0
mRNA_D-dichotoma_M_contig78.18631.1	7	1	2	0	2	0	1	1	1	3	0	1	215	110	191	88	121	118	126	128	33	52	209	159	170	93	56
mRNA_D-dichotoma_M_contig78.18636.1	10	1	3	138	20	41	13	7	5	14	3	1	67	45	46	86	42	27	83	53	27	9	122	50	25	38	38
mRNA_D-dichotoma_M_contig79.18716.1	138	87	64	0	0	0	192	75	43	142	37	36	814	1054	744	882	1115	601	1062	746	813	725	1368	668	809	1120	948
mRNA_D-dichotoma_M_contig79.18719.1	3	0	1	0	0	0	11	4	1	11	2	4	1012	25	24	24	45	2	1	3	4	8	3	12	38	3	1
mRNA_D-dichotoma_M_contig749.18328.1	4	2	2	0	0	0	4	1	4	0	1	2	48	43	132	75	64	46	317	245	19	30	164	89	41	28	39
mRNA_D-dichotoma_M_contig750.18350.1	0	0	0	0	0	0	0	0	0	0	0	0	0	0	0	0	0	0	0	0	0	0	0	0	0	0	1
mRNA_D-dichotoma_M_contig751.18355.1	13	4	4	1	1	1	12	4	7	10	5	0	6	12	107	32	11	22	78	71	14	26	55	50	73	27	26
mRNA_D-dichotoma_M_contig751.18359.1	14	2	3	0	0	0	49	0	2	14	0	0	163	418	264	191	366	203	646	355	66	59	1032	288	138	168	80
mRNA_D-dichotoma_M_contig752.18363.1	8	10	3	6	1	4	40	9	11	11	2	3	971	336	1029	297	158	525	726	647	97	88	815	576	527	160	110
mRNA_D-dichotoma_M_contig752.18373.1	5	1	1	16	1	5	0	0	4	0	0	0	275	95	290	45	35	84	100	101	34	38	157	76	138	68	33
mRNA_D-dichotoma_M_contig2947.10182.1	0	0	0	4	0	0	1	0	0	2	0	0	15	3	10	14	2	4	21	22	6	8	21	21	7	14	10
mRNA_D-dichotoma_M_contig2953.10204.1	26	14	14	0	0	0	87	16	20	87	15	9	44	10	50	4	23	4	23	40	50	66	25	18	15	42	129
mRNA_D-dichotoma_M_contig2959.10212.1	0	0	0	0	0	0	0	0	0	0	0	0	3	2	1	5	0	11	1	4	0	6	7	18	27	8	8
mRNA_D-dichotoma_M_contig2961.10231.1	0	0	0	1	0	0	2	1	0	2	0	1	0	0	0	0	0	1	1	0	0	0	0	33	16	8	6
mRNA_D-dichotoma_M_contig3304.11373.1	25	5	8	4	2	4	161	7	4	11	3	5	355	402	155	343	117	167	383	225	86	113	609	262	199	235	218
mRNA_D-dichotoma_M_contig3304.11374.1	2	2	1	0	0	0	14	0	1	6	2	0	822	388	349	164	6	669	6	6	249	471	3	8	12	5	2
mRNA_D-dichotoma_M_contig3310.11387.1	23	9	10	0	0	0	18	4	9	42	16	9	102	196	246	442	262	79	160	159	31	60	188	259	227	223	99
mRNA_D-dichotoma_M_contig3316.11398.1	0	0	0	0	0	0	1	0	0	0	0	0	13	5	2	20	2	1	3	4	0	0	0	0	5	1	0
mRNA_D-dichotoma_M_contig3319.11401.1	68	40	50	725	155	745	100	34	21	42	20	16	2339	3659	4880	6967	4925	2636	4065	3925	1274	2248	3457	4145	3516	4414	2156
mRNA_D-dichotoma_M_contig59.16752.1	49	55	57	3	4	0	46	28	56	82	32	30	798	977	906	2151	1873	864	1024	1258	1342	1351	1062	1001	1038	1892	2018
mRNA_D-dichotoma_M_contig59.16756.1	40	34	31	154	42	107	27	26	20	27	6	6	561	1223	1014	1853	1609	969	1266	1213	692	899	679	1145	923	1445	894
mRNA_D-dichotoma_M_contig59.16758.1	8	11	7	0	0	0	11	13	9	33	16	14	21	31	34	17	6	9	25	24	22	19	29	28	15	33	27
mRNA_D-dichotoma_M_contig60.16878.1	0	0	0	0	0	0	0	0	0	0	0	0	0	0	0	0	0	0	0	0	0	0	0	0	0	0	0
mRNA_D-dichotoma_M_contig174.4980.1	45	29	34	5	1	7	33	32	21	35	13	15	2985	1951	2665	2776	2124	2221	2962	2631	1349	1671	2945	2665	2643	2559	1908
mRNA_D-dichotoma_M_contig174.4983.1	3	1	0	4347	161	2035	13	0	3	3	0	1	0	0	1	0	0	0	6	1	1	0	63	180	1	1436	1275
mRNA_D-dichotoma_M_contig175.5029.1	13	15	11	2	2	4	20	8	19	32	10	9	105	133	107	166	108	107	163	127	33	57	293	240	140	184	129
mRNA_D-dichotoma_M_contig175.5030.1	3	2	2	2	5	0	1	4	9	5	2	3	37	46	51	47	36	53	67	49	14	19	105	89	39	62	64
mRNA_D-dichotoma_M_contig175.5039.1	45	34	55	12	11	10	74	31	29	30	10	8	2429	868	2606	2556	2154	983	1656	1710	293	747	2111	1239	1937	1662	1415
mRNA_D-dichotoma_M_contig439.14051.1	0	0	0	0	0	0	0	0	0	0	0	0	0	1	0	0	0	0	0	0	0	0	2	0	0	1	0
mRNA_D-dichotoma_M_contig440.14085.1	0	0	0	0	0	0	0	0	0	0	0	0	0	0	0	0	0	0	1	0	0	1	0	0	0	0	0
mRNA_D-dichotoma_M_contig441.14100.1	0	0	0	0	0	0	0	0	0	0	0	0	13	9	9	18	4	16	8	6	13	13	47	21	14	9	19
mRNA_D-dichotoma_M_contig441.14105.1	15	17	30	0	0	0	10	8	17	6	2	3	75	172	222	727	371	212	317	316	191	244	200	268	344	423	212
mRNA_D-dichotoma_M_contig52.15647.1	26	18	28	118	11	47	23	20	21	19	7	1	1442	715	1423	2135	2520	983	1219	1126	578	1005	1327	942	1115	1814	1406
mRNA_D-dichotoma_M_contig52.15663.1	1	0	2	8	4	3	1	0	4	4	0	3	37	113	105	94	136	3	30	16	2	1	53	47	30	15	23
mRNA_D-dichotoma_M_contig52.15664.1	3	0	1	7	1	2	2	0	1	9	1	1	7	74	73	81	156	12	27	23	3	1	61	46	16	17	20
mRNA_D-dichotoma_M_contig52.15670.1	1	0	0	3423	337	2674	5	2	0	2	0	0	0	5	5	2	1	0	4	1	0	0	98	418	1	1264	1079
mRNA_D-dichotoma_M_contig53.15814.1	662	349	400	17	5	15	629	303	330	340	122	91	1035	1767	1123	981	1715	836	1416	810	639	838	2126	1324	1383	1154	781
mRNA_D-dichotoma_M_contig50.15305.1	2	1	2	1	0	2	2	1	0	2	0	0	54	93	82	93	47	14	129	76	4	3	89	77	17	95	229
mRNA_D-dichotoma_M_contig50.15306.1	17	13	17	7	2	18	12	12	16	8	4	3	1275	864	1846	1808	1649	955	1552	1343	162	466	1362	1305	1297	1247	511
mRNA_D-dichotoma_M_contig51.15478.1	6	1	1	268	18	33	18	0	0	33	11	7	77	135	139	65	120	58	166	178	10	29	209	207	150	116	65
mRNA_D-dichotoma_M_contig51.15479.1	1	0	0	149	9	51	7	1	1	21	6	5	162	112	247	52	103	41	202	173	2	10	192	167	140	77	26
mRNA_D-dichotoma_M_contig51.15480.1	0	0	0	1	0	0	0	1	0	1	0	0	0	0	0	2	7	0	0	0	0	0	0	0	0	7	2
mRNA_D-dichotoma_M_contig51.15486.1	12	5	9	1	1	0	19	34	21	61	15	29	12	23	67	6	36	29	276	137	140	38	125	1	17	16	12
mRNA_D-dichotoma_M_contig51.15487.1	12	2	2	0	2	0	10	7	10	35	6	12	7	26	52	10	0	9	151	103	34	17	95	0	8	8	9
mRNA_D-dichotoma_M_contig1501.3606.1	0	0	0	0	0	0	0	0	0	0	0	0	28	22	1	8	12	32	15	9	18	18	8	3	4	5	20
mRNA_D-dichotoma_M_contig1502.3609.1	98	75	60	0	0	0	86	54	61	76	14	17	0	4	6	11	2	2	79	34	3	2	4	0	0	2	0
mRNA_D-dichotoma_M_contig1502.3610.1	3	3	1	0	0	0	8	3	0	9	1	5	11	6	0	0	0	2	2	2	1	0	0	0	4	6	0
mRNA_D-dichotoma_M_contig1503.3620.1	0	0	0	0	0	0	0	0	0	0	0	0	0	0	0	0	0	0	0	0	0	0	0	0	0	0	0
mRNA_D-dichotoma_M_contig1503.3621.1	0	0	0	0	0	0	0	0	0	0	0	0	1	0	0	0	0	1	0	0	0	0	1	0	0	0	1
mRNA_D-dichotoma_M_contig1506.3627.1	3	0	1	0	0	0	13	0	0	2	0	0	0	0	2	0	0	0	1	0	0	0	1	0	0	0	0
mRNA_D-dichotoma_M_contig1507.3629.1	17	12	31	0	0	0	37	18	19	27	20	14	497	368	495	878	777	321	335	326	404	336	671	416	390	720	535
mRNA_D-dichotoma_M_contig1515.3669.1	3	0	6	0	0	0	4	1	1	1	2	1	3	34	23	15	17	5	12	21	6	7	17	25	33	27	24
mRNA_D-dichotoma_M_contig2324.7873.1	23	10	7	0	0	0	17	4	10	17	6	9	6	18	19	4	0	10	22	5	2	1	7	31	12	8	0
mRNA_D-dichotoma_M_contig2325.7877.1	11	2	7	1	2	8	50	10	11	18	8	3	10	35	29	27	24	10	43	22	9	10	60	49	26	19	76
mRNA_D-dichotoma_M_contig2326.7880.1	8	0	1	0	0	0	4	2	2	1	0	1	0	1	6	0	0	3	35	28	0	0	0	0	0	0	0
mRNA_D-dichotoma_M_contig2327.7882.1	0	0	0	1	1	4	0	0	0	1	1	0	0	2	10	13	0	1	14	5	5	4	26	3	3	15	10
mRNA_D-dichotoma_M_contig2329.7889.1	1	2	7	6	15	1	5	4	3	12	4	16	45	29	122	204	132	40	63	66	44	19	151	62	40	62	34
mRNA_D-dichotoma_M_contig2330.7906.1	1	0	0	0	0	0	1	0	0	2	0	4	20	0	0	0	0	0	0	0	0	0	15	4	19	43	11
mRNA_D-dichotoma_M_contig2330.7908.1	48	54	26	0	0	0	127	21	41	195	65	62	0	3	5	3	7	1	7	6	0	2	9	0	0	1	10
mRNA_D-dichotoma_M_contig2330.7909.1	4	11	1	8	0	1	16	3	2	118	27	32	18	47	39	59	144	12	12	8	18	14	86	9	40	24	11
mRNA_D-dichotoma_M_contig2331.7911.1	60	37	44	0	0	2	32	50	46	25	12	12	2523	853	1739	970	537	654	886	910	603	510	968	954	1012	768	633
mRNA_D-dichotoma_M_contig481.14902.1	5	2	5	2	0	0	4	0	2	1	2	2	58	86	554	156	89	28	357	148	70	45	112	63	32	45	170
mRNA_D-dichotoma_M_contig481.14904.1	2	2	2	92	17	41	5	4	1	2	0	3	0	0	1	0	0	0	0	0	0	2	1	12	0	51	67
mRNA_D-dichotoma_M_contig481.14916.1	2	0	3	10	0	7	5	1	3	7	3	5	23	17	19	47	83	10	37	27	6	3	25	3	12	23	47
mRNA_D-dichotoma_M_contig483.14948.1	1	1	1	2	0	0	0	2	2	1	0	0	6	28	8	28	53	30	17	39	18	22	51	35	24	11	12
mRNA_D-dichotoma_M_contig483.14951.1	0	0	1	17	5	18	10	2	1	2	2	2	23	41	61	7	11	23	9	9	7	7	32	84	13	181	494
mRNA_D-dichotoma_M_contig484.14963.1	18	11	7	0	0	0	18	3	3	30	4	10	69	111	167	158	103	13	203	81	31	8	131	183	186	100	53
mRNA_D-dichotoma_M_contig484.14971.1	11	3	5	0	0	1	6	9	4	16	9	2	536	802	530	1037	698	625	686	675	318	489	617	838	736	914	563
mRNA_D-dichotoma_M_contig1268.2069.1	170	116	137	0	0	0	188	105	63	99	15	26	1676	1585	1775	1883	1219	1499	1303	1117	715	1063	1479	1695	2112	2036	1298
mRNA_D-dichotoma_M_contig1270.2093.1	15	3	9	28	12	21	32	5	8	1	0	0	80	415	501	715	495	10	50	46	5	12	206	97	113	88	228
mRNA_D-dichotoma_M_contig1271.2100.1	32	26	16	39	6	22	84	12	14	54	8	10	846	662	459	1124	446	275	635	453	869	622	1026	702	473	816	811
mRNA_D-dichotoma_M_contig1782.5183.1	5	3	9	9	3	6	1	4	9	11	7	12	206	138	392	502	447	132	234	265	131	88	265	132	79	320	181
mRNA_D-dichotoma_M_contig1782.5184.1	112	70	78	35	11	28	57	32	34	104	41	30	1275	1288	1489	1812	1258	1047	1503	1530	825	697	1732	1255	1055	1357	1072
mRNA_D-dichotoma_M_contig1783.5186.1	18	0	11	0	0	1	18	0	0	1	0	4	0	8	3	15	7	3	2	2	0	2	3	4	20	3	7
mRNA_D-dichotoma_M_contig1784.5189.1	8	14	7	0	0	0	5	10	9	4	0	6	32	36	71	76	136	22	28	23	25	43	23	14	21	60	11
mRNA_D-dichotoma_M_contig1785.5191.1	159	27	57	110	6	65	130	40	39	78	17	21	603	568	1333	500	376	102	959	465	159	102	1098	710	587	397	376
mRNA_D-dichotoma_M_contig1165.1358.1	8	11	3	0	0	0	13	0	5	5	1	7	292	515	684	498	677	257	486	386	68	118	519	533	398	426	249
mRNA_D-dichotoma_M_contig1167.1366.1	58	18	15	0	0	1	24	8	14	17	5	4	1719	1558	1398	2261	1489	766	1514	1247	304	734	1497	2022	1180	1439	999
mRNA_D-dichotoma_M_contig1167.1367.1	26	2	4	0	0	0	9	4	4	4	0	4	1633	666	1630	1452	747	566	924	921	131	276	1068	1088	775	582	435
mRNA_D-dichotoma_M_contig1168.1369.1	7	0	0	2	1	0	15	0	0	26	0	0	0	1	3	2	0	1	7	4	0	0	0	1	5	1	0
mRNA_D-dichotoma_M_contig1168.1371.1	26	24	27	20	39	17	42	15	23	53	27	32	2919	2369	3147	4526	3982	1818	2516	2298	726	1120	3298	2410	2321	3757	1691
mRNA_D-dichotoma_M_contig1168.1375.1	0	1	0	0	0	1	0	0	0	0	0	0	0	0	0	0	0	0	0	0	0	0	0	0	0	0	0
mRNA_D-dichotoma_M_contig2935.10152.1	128	1	4	4	7	0	123	1	2	50	2	1	3	0	10	1	3	11	15	5	0	15	0	57	24	21	5
mRNA_D-dichotoma_M_contig2935.10153.1	55	3	5	3	7	0	71	3	4	38	2	4	13	26	8	7	0	15	13	13	2	25	5	551	203	70	21
mRNA_D-dichotoma_M_contig2935.10154.1	47	3	1	1	8	3	35	1	1	39	0	2	4	1	0	5	0	6	1	1	0	2	0	150	49	24	2
mRNA_D-dichotoma_M_contig2943.10172.1	1	4	0	1	1	1	6	3	1	0	0	1	80	175	79	198	153	117	141	156	79	123	173	152	194	196	227
mRNA_D-dichotoma_M_contig2943.10173.1	4	6	4	3	3	3	6	0	0	1	2	0	210	204	147	144	123	172	232	210	95	100	239	227	208	194	200
mRNA_D-dichotoma_M_contig522.15704.1	0	1	4	2	0	0	0	3	6	1	4	1	3	25	14	65	35	17	21	27	13	13	76	33	28	76	30
mRNA_D-dichotoma_M_contig523.15719.1	178	163	154	1	0	0	118	120	88	151	57	57	251	277	369	738	660	245	377	326	240	294	669	308	278	778	520
mRNA_D-dichotoma_M_contig523.15720.1	66	34	58	0	0	1	60	38	36	79	49	49	337	114	411	389	274	168	244	354	84	89	573	194	210	276	251
mRNA_D-dichotoma_M_contig524.15738.1	99	60	72	5	1	2	132	47	61	124	38	59	2330	1192	2086	1882	1396	1006	1659	1565	658	668	2097	1379	1302	1369	1170
mRNA_D-dichotoma_M_contig525.15751.1	0	0	0	0	0	0	0	1	5	93	22	18	91	0	14	1	27	60	0	0	4	3	1	1	3	1	70
mRNA_D-dichotoma_M_contig256.8800.1	3	11	4	1	0	0	25	2	7	21	7	7	44	92	77	138	119	54	77	75	74	68	138	48	32	117	92
mRNA_D-dichotoma_M_contig256.8804.1	38	32	34	81	23	82	30	15	13	69	16	26	80	15	415	125	20	27	412	225	6	26	32	26	9	59	108
mRNA_D-dichotoma_M_contig256.8805.1	21	7	10	33	6	17	24	10	7	30	4	0	0	5	5	11	0	2	19	13	10	2	16	46	12	102	232
mRNA_D-dichotoma_M_contig4822.14934.1	1	0	0	0	1	0	0	0	0	0	0	0	1	1	2	7	13	2	2	0	0	0	1	16	10	6	5
mRNA_D-dichotoma_M_contig4827.14941.1	546	57	138	39	62	14	211	69	73	401	43	39	42	137	79	44	19	154	104	36	1	7	149	1050	994	125	74
mRNA_D-dichotoma_M_contig4827.14943.1	0	0	0	1	0	0	0	0	0	0	0	0	22	0	0	1	0	0	0	0	0	0	77	179	79	98	96
mRNA_D-dichotoma_M_contig4827.14944.1	0	0	0	0	0	0	0	0	0	0	0	0	0	0	0	0	0	0	0	0	0	0	0	1	1	0	0
mRNA_D-dichotoma_M_contig4827.14945.1	8	1	1	6	41	0	14	2	4	59	2	7	92	13	1	8	14	2	3	1	0	42	35	464	448	302	107
mRNA_D-dichotoma_M_contig4841.14973.1	0	0	0	0	0	0	0	0	0	1	0	0	3	4	2	3	0	2	2	0	3	0	4	4	7	3	3
mRNA_D-dichotoma_M_contig4843.14974.1	333	273	171	1	0	2	1409	340	632	1201	317	301	702	223	2063	571	81	921	1432	1835	142	315	325	738	752	370	281
mRNA_D-dichotoma_M_contig5040.15392.1	0	0	0	0	0	0	1	0	0	0	0	0	567	44	70	41	352	311	32	23	326	318	61	18	44	80	396
mRNA_D-dichotoma_M_contig5041.15394.1	0	0	0	0	0	0	0	0	0	0	0	0	0	0	0	0	0	0	0	0	0	0	0	0	0	0	0
mRNA_D-dichotoma_M_contig5062.15432.1	0	0	0	0	0	0	0	0	0	1	0	0	34	69	133	25	38	12	93	29	6	4	88	16	22	14	17
mRNA_D-dichotoma_M_contig5073.15448.1	0	0	0	0	0	0	1	0	0	0	0	1	119	79	36	41	76	53	48	51	6	9	161	103	101	51	15
mRNA_D-dichotoma_M_contig5075.15450.1	0	3	0	75	8	22	4	0	0	7	0	0	34	27	38	22	11	20	29	20	2	3	55	46	40	12	7
mRNA_D-dichotoma_M_contig5077.15451.1	1	0	0	2	0	0	8	0	0	7	0	0	51	142	74	126	88	52	145	115	29	27	145	150	89	71	75
mRNA_D-dichotoma_M_contig5077.15452.1	0	0	0	7	4	3	14	0	0	18	1	2	172	282	401	464	142	159	497	462	62	42	488	401	264	178	104
mRNA_D-dichotoma_M_contig5077.15453.1	0	0	0	0	0	0	6	0	0	0	0	0	6	25	10	2	1	9	5	3	8	4	14	8	6	3	4
mRNA_D-dichotoma_M_contig3588.12078.1	0	0	0	0	0	0	0	0	0	1	1	0	43	49	85	45	30	53	47	35	6	7	191	107	112	58	24
mRNA_D-dichotoma_M_contig3589.12080.1	3	0	4	0	0	0	1	0	0	5	1	1	188	266	491	536	357	609	593	780	239	204	338	483	506	209	114
mRNA_D-dichotoma_M_contig3594.12100.1	5	2	0	0	0	0	14	1	2	38	10	10	0	0	0	0	0	0	2	0	0	0	0	0	0	0	0
mRNA_D-dichotoma_M_contig3596.12101.1	0	0	0	0	0	0	0	0	0	0	0	0	1	10	6	5	1	0	8	17	5	3	14	2	4	7	0
mRNA_D-dichotoma_M_contig3604.12154.1	0	0	0	0	0	0	0	0	0	0	0	0	1	31	0	17	0	14	1	0	8	16	4	57	20	1	7
mRNA_D-dichotoma_M_contig2058.6588.1	3	0	1	0	0	0	3	3	1	3	1	0	9	5	22	1	0	0	5	1	0	0	3	0	0	0	0
mRNA_D-dichotoma_M_contig2058.6591.1	4	3	0	3	0	0	4	1	0	8	0	0	5	0	5	4	0	0	3	3	1	2	2	3	3	1	0
mRNA_D-dichotoma_M_contig2061.6619.1	4	2	0	115	24	39	6	0	4	12	4	3	4	5	7	1	12	0	13	12	2	2	13	6	6	14	58
mRNA_D-dichotoma_M_contig2066.6635.1	135	138	167	11	3	9	124	135	86	100	38	76	3999	3196	4226	3722	2886	3268	3744	4390	2015	2331	3372	3863	4554	3667	2466
mRNA_D-dichotoma_M_contig1608.4247.1	14	10	14	7	2	6	31	10	11	40	19	22	5	5	176	31	19	12	63	37	11	2	43	28	9	23	25
mRNA_D-dichotoma_M_contig1608.4250.1	6	1	0	30	4	18	8	1	0	10	0	0	124	54	96	175	58	1	12	9	0	2	0	3	0	0	0
mRNA_D-dichotoma_M_contig1608.4252.1	55	10	32	59	16	26	73	26	31	74	25	36	1131	632	607	468	351	7	96	70	0	2	1	5	0	1	4
mRNA_D-dichotoma_M_contig1609.4257.1	38	14	18	0	0	0	37	13	5	21	8	7	2760	1268	2744	1004	973	865	1377	1141	400	468	1604	1566	1660	833	604
mRNA_D-dichotoma_M_contig1610.4275.1	49	6	19	0	0	0	29	7	23	15	4	5	1	0	22	0	6	11	70	64	0	0	1	0	0	2	0
mRNA_D-dichotoma_M_contig1611.4277.1	62	21	34	189	32	107	103	22	29	54	16	14	5	72	43	47	83	39	141	81	26	36	68	93	35	73	113
mRNA_D-dichotoma_M_contig1612.4281.1	9	0	3	8	4	7	10	3	2	13	5	4	455	300	403	246	183	176	357	380	60	69	371	352	176	104	58
mRNA_D-dichotoma_M_contig1613.4286.1	0	3	0	4	1	0	0	0	0	2	1	2	0	6	5	18	9	1	14	7	3	0	7	104	29	29	3
mRNA_D-dichotoma_M_contig63.17211.1	160	59	102	1185	105	934	219	62	59	71	9	17	61	386	296	97	144	91	406	223	48	49	267	321	88	594	867
mRNA_D-dichotoma_M_contig63.17213.1	0	0	0	11	8	1	0	0	0	3	2	0	26	14	1	5	6	1	10	8	0	0	0	40	12	3	1
mRNA_D-dichotoma_M_contig63.17220.1	3	0	0	0	0	0	0	0	0	1	0	0	0	112	68	13	143	27	26	7	1	5	41	41	20	30	20
mRNA_D-dichotoma_M_contig63.17223.1	0	0	0	0	0	0	0	1	0	0	0	0	0	3	0	0	0	0	0	1	0	0	0	1	0	0	0
mRNA_D-dichotoma_M_contig927.19996.1	21	0	6	1	0	0	7	4	2	2	2	3	45	85	295	148	143	11	222	113	18	16	399	33	29	34	41
mRNA_D-dichotoma_M_contig927.19998.1	8	0	1	2	0	5	0	0	3	3	7	0	64	391	348	468	291	100	607	318	52	27	1256	211	213	192	144
mRNA_D-dichotoma_M_contig927.19997.1	2	0	3	2	1	3	10	0	7	5	1	1	84	442	294	412	196	99	734	321	133	71	1373	309	254	197	177
mRNA_D-dichotoma_M_contig927.20002.1	0	0	0	84	11	40	0	1	0	0	0	0	0	0	1	0	0	0	1	0	0	0	11	39	1	106	90
mRNA_D-dichotoma_M_contig929.20032.1	2	0	1	432	148	213	18	0	3	3	1	0	0	41	9	17	1	22	16	14	10	11	43	103	15	213	75
mRNA_D-dichotoma_M_contig930.20050.1	0	0	0	0	0	0	0	0	1	0	0	0	7	47	22	18	10	15	19	23	12	3	6	20	14	6	2
mRNA_D-dichotoma_M_contig931.20053.1	0	0	0	33	10	1	0	0	0	0	0	0	8	7	23	18	4	1	95	86	3	2	34	11	10	10	3
mRNA_D-dichotoma_M_contig931.20054.1	0	0	0	103	17	38	1	0	0	0	0	0	3	1	6	3	0	1	0	3	8	0	0	1	2	4	2
mRNA_D-dichotoma_M_contig1122.1050.1	56	24	23	0	0	0	61	23	21	49	18	16	2197	1176	2384	1802	1577	1388	1444	1423	703	969	1934	1639	1728	1327	1360
mRNA_D-dichotoma_M_contig1122.1052.1	2	0	4	13	0	5	14	7	6	23	11	12	613	436	1024	537	313	229	582	640	137	110	560	699	481	302	274
mRNA_D-dichotoma_M_contig1123.1053.1	0	0	0	0	0	0	0	0	0	0	0	0	0	0	0	3	0	0	0	1	0	0	0	0	0	0	0
mRNA_D-dichotoma_M_contig1125.1062.1	131	58	50	0	0	0	103	32	22	40	8	15	350	285	215	263	205	148	200	127	58	111	240	399	509	444	57
mRNA_D-dichotoma_M_contig1126.1065.1	189	85	85	1	0	0	195	40	70	77	24	26	195	185	471	420	147	166	295	298	139	113	508	220	225	262	188
mRNA_D-dichotoma_M_contig1126.1067.1	0	0	0	0	0	0	0	0	0	0	0	0	0	6	1	0	0	0	0	0	0	0	0	4	0	0	0
mRNA_D-dichotoma_M_contig1126.1068.1	15	9	8	0	0	0	28	1	1	19	3	5	10	9	11	6	17	10	1	3	2	5	8	2	4	8	1
mRNA_D-dichotoma_M_contig1127.1070.1	14	4	4	2	0	2	1	3	8	11	3	2	24	28	106	65	70	17	47	41	26	35	55	47	41	62	32
mRNA_D-dichotoma_M_contig1127.1073.1	30	28	15	0	0	0	71	18	21	30	10	18	1203	937	1477	1444	1244	721	1180	950	230	421	1186	1004	950	943	692
mRNA_D-dichotoma_M_contig1127.1074.1	16	0	1	0	0	0	5	0	1	0	0	0	10	6	2	14	1	2	14	11	0	8	69	89	45	75	56
mRNA_D-dichotoma_M_contig1127.1075.1	4	4	2	0	1	0	4	0	0	1	0	0	42	1	6	8	0	1	10	4	1	3	52	77	50	43	64
mRNA_D-dichotoma_M_contig1127.1076.1	6	6	2	0	0	0	10	2	4	4	1	1	102	11	18	16	0	1	19	20	2	11	220	239	134	102	147
mRNA_D-dichotoma_M_contig3792.12601.1	0	4	0	34	9	18	0	0	1	0	0	0	0	0	0	0	0	0	0	0	0	0	0	5	1	11	23
mRNA_D-dichotoma_M_contig3796.12602.1	0	0	0	36	0	0	1	0	0	4	0	0	2	5	15	11	17	8	9	3	5	2	4	10	6	24	39
mRNA_D-dichotoma_M_contig3796.12603.1	3	0	0	464	56	101	21	2	1	34	2	4	97	81	112	58	58	54	144	150	22	37	29	60	47	45	65
mRNA_D-dichotoma_M_contig3805.12648.1	0	0	0	0	0	0	0	0	0	0	0	0	0	0	0	0	0	0	0	0	0	0	0	0	0	0	0
mRNA_D-dichotoma_M_contig3808.12651.1	0	0	0	3	0	0	1	0	0	0	0	0	7	0	3	9	11	3	4	4	1	6	15	30	41	30	7
mRNA_D-dichotoma_M_contig395.12997.1	0	0	0	0	0	0	0	0	0	0	0	0	0	0	0	0	0	0	0	0	0	0	0	0	0	0	0
mRNA_D-dichotoma_M_contig395.13002.1	2	0	1	0	0	0	0	0	0	0	0	0	1	0	0	1	0	0	0	0	0	0	0	0	0	1	0
mRNA_D-dichotoma_M_contig395.13004.1	2	1	0	0	0	0	4	0	1	34	0	1	508	858	429	863	502	932	801	919	610	612	670	568	551	595	516
mRNA_D-dichotoma_M_contig395.13005.1	197	88	42	0	0	1	450	33	41	101	8	15	29	67	99	9	2	40	101	64	37	16	50	8	24	3	1
mRNA_D-dichotoma_M_contig395.13007.1	30	11	9	0	0	0	58	5	8	26	9	4	5	6	15	1	5	31	46	21	61	46	10	3	11	3	2
mRNA_D-dichotoma_M_contig395.13008.1	23	3	5	0	0	0	19	4	6	44	8	8	2	8	7	4	6	1	0	1	0	1	2	10	29	3	1
mRNA_D-dichotoma_M_contig397.13041.1	0	0	1	0	0	0	1	0	0	1	0	2	0	59	251	66	58	11	9	11	5	4	5	7	18	2	9
mRNA_D-dichotoma_M_contig2344.7955.1	6	0	0	7	3	0	9	2	4	19	4	6	87	125	229	105	38	94	122	95	12	29	105	121	89	50	35
mRNA_D-dichotoma_M_contig2345.7957.1	16	5	19	4	6	0	31	4	13	16	8	13	423	875	1333	838	974	329	701	437	215	179	1032	651	391	650	501
mRNA_D-dichotoma_M_contig2349.7977.1	1084	703	751	313	76	184	463	347	570	1089	529	582	3211	1498	5922	3854	2646	1612	2656	2849	2832	2051	4257	1670	1430	2353	4896
mRNA_D-dichotoma_M_contig2349.7978.1	0	0	0	0	0	0	0	0	0	0	0	0	0	0	0	0	0	0	0	0	0	0	0	0	0	0	0
mRNA_D-dichotoma_M_contig2351.7991.1	0	0	0	0	0	0	0	0	0	0	1	0	0	0	1	0	0	0	0	0	0	0	0	1	0	0	0
mRNA_D-dichotoma_M_contig2351.7992.1	0	0	0	1	0	0	3	0	0	2	1	0	0	3	3	4	0	0	1	4	0	0	2	14	7	7	0
mRNA_D-dichotoma_M_contig2353.7997.1	16	0	4	0	0	4	45	3	5	35	11	4	133	194	202	357	274	105	181	115	26	20	361	211	204	231	107
mRNA_D-dichotoma_M_contig2353.7996.1	7	2	5	0	0	0	25	9	9	40	7	9	27	186	65	79	43	52	108	70	19	8	195	124	110	48	27
mRNA_D-dichotoma_M_contig510.15498.1	1	1	3	1	0	0	1	3	4	1	0	0	16	8	116	8	22	19	38	18	4	2	26	4	14	6	6
mRNA_D-dichotoma_M_contig510.15504.1	108	39	60	29	15	14	38	12	11	31	6	5	4267	2182	2791	4677	2898	4354	3428	4195	2750	3823	2844	2718	3365	3522	3867
mRNA_D-dichotoma_M_contig365.12265.1	12	12	3	0	0	0	124	1	14	9	1	2	0	0	1	0	0	3	2	4	3	2	2	1	5	1	3
mRNA_D-dichotoma_M_contig1556.3899.1	0	0	0	0	1	0	0	0	0	0	0	0	0	0	0	0	0	0	0	2	0	0	0	5	0	0	0
mRNA_D-dichotoma_M_contig1556.3900.1	7	13	7	0	0	0	7	9	9	10	4	4	136	52	192	150	138	84	135	129	183	77	174	55	44	136	234
mRNA_D-dichotoma_M_contig1557.3902.1	43	13	27	45029	5985	21395	104	58	31	31	12	13	408	261	681	745	528	785	586	649	411	366	795	665	773	992	495
mRNA_D-dichotoma_M_contig1560.3926.1	40	16	14	30	4	11	62	8	16	41	5	7	0	1	21	15	0	2	39	23	0	1	16	27	0	30	93
mRNA_D-dichotoma_M_contig18.5263.1	24	8	10	1	1	0	237	13	13	16	6	9	523	314	729	284	342	175	794	442	82	52	1590	446	264	289	212
mRNA_D-dichotoma_M_contig18.5265.1	0	0	0	0	0	0	0	0	0	0	0	0	0	0	0	2	0	0	0	0	0	0	0	2	0	0	1
mRNA_D-dichotoma_M_contig18.5266.1	0	0	0	1	0	0	0	0	0	1	0	0	0	0	0	0	0	0	0	0	0	0	0	0	0	0	0
mRNA_D-dichotoma_M_contig18.5267.1	0	0	0	0	0	0	2	0	0	0	0	0	0	0	0	0	1	0	0	0	0	0	0	1	0	0	0
mRNA_D-dichotoma_M_contig18.5272.1	33	11	12	2	0	0	46	12	4	24	9	12	53	149	116	44	60	40	84	31	4	26	98	79	43	33	9
mRNA_D-dichotoma_M_contig18.5279.1	32	14	11	1	0	0	26	6	11	18	2	1	961	589	1613	858	645	478	687	696	159	223	745	669	521	501	337
mRNA_D-dichotoma_M_contig18.5287.1	22	12	16	7	7	4	10	8	11	42	14	18	173	275	328	438	442	135	216	182	245	289	390	183	207	416	423
mRNA_D-dichotoma_M_contig192.5866.1	350	198	190	13	7	5	193	133	141	109	55	48	2493	2272	2845	3340	2123	2080	2849	2734	1549	1598	2943	2733	2794	2610	2073
mRNA_D-dichotoma_M_contig990.20538.1	0	1	0	0	0	0	1	0	2	0	0	0	0	0	0	0	0	0	0	0	0	0	0	0	0	0	0
mRNA_D-dichotoma_M_contig990.20539.1	0	0	0	3	0	0	0	0	0	3	0	2	0	0	0	0	0	0	0	0	0	0	0	0	0	0	0
mRNA_D-dichotoma_M_contig991.20544.1	97	70	64	0	0	0	90	68	91	190	73	63	751	1228	1236	2114	1424	562	1444	1143	442	427	1992	1399	1090	1344	1239
mRNA_D-dichotoma_M_contig992.20546.1	20	11	18	0	2	2	26	17	20	31	26	18	2889	3293	3538	5567	2833	4183	3552	4674	2200	1468	3234	5349	5552	3927	1854
mRNA_D-dichotoma_M_contig994.20557.1	0	1	0	0	0	0	2	1	0	0	0	0	0	0	0	5	0	0	4	0	2	1	0	1	2	0	2
mRNA_D-dichotoma_M_contig3745.12507.1	0	0	0	2	0	0	0	0	0	5	0	1	34	114	72	57	18	31	23	16	3	9	83	63	41	43	24
mRNA_D-dichotoma_M_contig3746.12508.1	23	4	11	68	123	16	17	2	5	1	3	2	0	0	0	0	0	0	1	0	0	0	0	0	1	1	0
mRNA_D-dichotoma_M_contig3749.12510.1	0	0	0	0	0	0	0	0	0	0	0	0	0	0	0	2	0	0	0	0	0	0	1	0	1	0	1
mRNA_D-dichotoma_M_contig3757.12531.1	1	0	0	0	0	0	0	0	0	0	0	0	1	11	2	9	7	13	8	7	1	3	0	1	1	0	0
mRNA_D-dichotoma_M_contig3757.12533.1	2	0	0	0	1	2	2	0	0	0	0	0	141	306	230	355	201	187	469	436	53	80	25	23	18	15	18
mRNA_D-dichotoma_M_contig3758.12535.1	0	0	0	4	0	0	0	0	0	0	0	0	0	0	0	0	0	0	0	0	0	0	0	5	0	0	3
mRNA_D-dichotoma_M_contig3761.12544.1	2	2	2	1	0	0	5	0	4	22	14	8	41	37	75	118	84	50	109	114	30	13	124	35	23	46	41
mRNA_D-dichotoma_M_contig3761.12545.1	0	0	3	0	1	0	0	4	3	17	4	13	224	95	130	142	152	116	119	159	38	62	527	257	115	156	184
mRNA_D-dichotoma_M_contig1869.5604.1	7	0	3	2	0	0	7	5	11	7	5	3	62	51	191	330	345	65	136	156	39	10	242	69	46	154	87
mRNA_D-dichotoma_M_contig1869.5605.1	308	213	233	3	8	7	175	109	250	381	237	219	4750	3620	6704	8847	5894	3357	6094	5506	2657	2253	7082	5208	4175	6273	4735
mRNA_D-dichotoma_M_contig1869.5607.1	5	7	6	367	53	332	52	15	24	8	2	3	0	2	2	0	0	1	8	9	1	0	3	35	4	115	237
mRNA_D-dichotoma_M_contig1872.5625.1	8	9	2	0	0	0	8	3	5	6	3	6	55	33	46	88	25	34	28	37	15	36	88	58	58	108	75
mRNA_D-dichotoma_M_contig1874.5629.1	5	1	2	0	0	1	15	2	3	29	3	2	19	20	24	32	49	11	19	19	7	2	196	62	28	57	47
mRNA_D-dichotoma_M_contig1875.5630.1	0	0	0	0	0	0	0	0	0	0	0	0	0	0	0	0	0	0	0	0	0	0	0	0	0	0	0
mRNA_D-dichotoma_M_contig2739.9453.1	31	36	26	0	0	0	27	43	19	46	13	8	23	118	76	177	215	52	141	84	127	134	62	55	54	122	156
mRNA_D-dichotoma_M_contig2740.9461.1	53	66	31	7	2	5	65	13	8	8	5	2	0	0	0	0	0	1	5	13	0	0	2	33	23	9	30
mRNA_D-dichotoma_M_contig453.14354.1	110	48	44	69	4	33	109	22	15	49	19	18	2316	1148	1469	1510	855	1005	1340	1261	801	926	1707	1479	1590	1210	1138
mRNA_D-dichotoma_M_contig454.14385.1	0	0	0	0	0	0	0	0	0	0	0	0	0	0	0	1	0	0	0	0	2	1	0	0	0	1	4
mRNA_D-dichotoma_M_contig454.14392.1	0	0	0	0	0	0	0	0	0	0	0	0	0	0	0	0	0	0	0	0	0	0	0	0	0	0	0
mRNA_D-dichotoma_M_contig26.8962.1	0	0	0	16	2	6	0	0	0	2	0	1	4	0	0	0	0	0	0	0	0	0	0	3	0	0	1
mRNA_D-dichotoma_M_contig27.9298.1	0	0	0	0	0	0	0	1	0	0	0	0	22	29	31	59	79	6	37	32	6	5	39	48	23	38	24
mRNA_D-dichotoma_M_contig27.9299.1	0	0	0	0	0	0	0	0	0	0	0	0	11	5	16	19	30	4	5	11	1	0	15	15	3	13	3
mRNA_D-dichotoma_M_contig27.9300.1	0	1	0	0	0	0	0	0	1	1	0	0	16	12	27	45	43	4	24	16	2	2	36	27	13	21	10
mRNA_D-dichotoma_M_contig27.9302.1	12	5	4	0	0	0	17	3	4	2	4	0	61	166	703	70	18	7	47	36	19	3	30	9	11	9	5
mRNA_D-dichotoma_M_contig27.9310.1	16	3	3	0	1	0	30	6	16	43	10	14	36	71	60	129	33	84	112	95	65	25	201	135	90	101	73
mRNA_D-dichotoma_M_contig27.9316.1	18	2	6	5147	942	2276	38	7	6	61	8	6	371	714	724	1049	716	398	1099	1130	263	243	1061	643	401	563	884
mRNA_D-dichotoma_M_contig611.16998.1	31	2	11	26	4	19	33	15	30	19	7	4	429	399	549	815	666	487	434	493	392	463	564	526	427	471	655
mRNA_D-dichotoma_M_contig611.17001.1	0	0	0	0	0	0	0	0	0	0	0	0	0	0	0	0	0	0	0	1	0	0	1	0	0	0	0
mRNA_D-dichotoma_M_contig611.17004.1	0	1	0	0	0	0	2	0	0	0	0	0	33	123	62	45	15	8	125	114	0	7	58	39	23	29	0
mRNA_D-dichotoma_M_contig612.17005.1	2	0	0	1	0	0	1	0	0	0	0	0	0	0	0	0	0	0	0	0	0	0	0	0	0	0	0
mRNA_D-dichotoma_M_contig614.17028.1	0	0	0	18	3	26	0	0	0	2	3	0	4	7	10	23	7	5	7	14	14	7	18	13	2	28	43
mRNA_D-dichotoma_M_contig614.17029.1	1	0	0	23	6	9	3	1	0	11	0	0	0	16	6	11	8	5	9	4	2	0	24	27	7	11	8
mRNA_D-dichotoma_M_contig382.12675.1	8	0	0	21	0	11	19	1	0	6	4	2	0	0	2	2	0	0	5	3	0	0	0	0	0	2	13
mRNA_D-dichotoma_M_contig383.12701.1	55	15	44	7	1	4	65	36	20	28	12	19	2732	556	1879	1232	1892	719	1968	1744	380	580	1980	744	1305	1427	1240
mRNA_D-dichotoma_M_contig383.12702.1	37	16	17	122	18	112	20	13	12	13	2	1	971	601	1206	1034	1418	556	848	630	570	672	1278	714	799	1425	939
mRNA_D-dichotoma_M_contig383.12704.1	0	0	2	0	2	4	0	0	0	0	0	0	0	0	0	6	0	0	0	0	0	1	0	0	0	0	4
mRNA_D-dichotoma_M_contig383.12706.1	1	1	1	19	0	7	1	0	1	1	0	0	56	4	238	124	0	8	91	52	4	7	0	8	7	6	10
mRNA_D-dichotoma_M_contig383.12707.1	3	0	5	18	0	3	0	0	1	0	0	0	22	18	225	52	7	3	67	26	0	4	1	1	2	2	6
mRNA_D-dichotoma_M_contig383.12708.1	0	0	3	9	1	0	0	0	1	0	0	0	28	0	179	50	0	1	41	24	0	0	0	0	0	0	2
mRNA_D-dichotoma_M_contig321.11086.1	10	8	16	0	0	0	10	11	10	10	1	14	539	258	1051	712	766	397	490	546	183	246	536	343	440	531	279
mRNA_D-dichotoma_M_contig322.11122.1	143	73	131	0	1	1	39	83	73	48	24	34	173	118	779	429	247	155	629	469	134	171	207	144	179	245	257
mRNA_D-dichotoma_M_contig322.11126.1	1	3	5	26	2	9	3	3	0	2	1	0	5	7	4	4	9	4	26	19	1	3	16	21	3	43	140
mRNA_D-dichotoma_M_contig323.11147.1	4	6	0	0	0	0	11	4	1	17	3	3	296	870	426	600	786	570	1564	1564	155	293	1142	1108	766	420	334
mRNA_D-dichotoma_M_contig115.1225.1	6	0	2	2	0	0	2	2	1	3	0	0	7	9	36	12	13	0	4	8	0	1	7	12	1	1	4
mRNA_D-dichotoma_M_contig115.1229.1	8	7	6	151	13	107	8	1	8	10	15	8	66	187	69	145	47	86	93	76	24	42	119	230	124	217	267
mRNA_D-dichotoma_M_contig115.1239.1	186	57	72	4	0	5	133	72	78	139	47	36	779	1368	2017	857	916	877	1108	703	544	513	1467	932	1166	729	616
mRNA_D-dichotoma_M_contig115.1242.1	1	0	1	0	0	0	0	0	2	3	0	1	39	98	81	69	45	33	77	68	7	17	134	59	30	31	40
mRNA_D-dichotoma_M_contig116.1308.1	0	0	0	0	0	0	0	0	0	0	0	1	0	0	6	2	0	4	27	12	0	0	2	29	14	3	0
mRNA_D-dichotoma_M_contig116.1311.1	8	3	7	0	0	0	2	4	1	0	0	0	1018	152	962	627	876	337	440	517	96	141	485	312	286	384	315
mRNA_D-dichotoma_M_contig184.5456.1	0	0	0	0	0	0	2	0	0	2	1	0	0	5	5	4	0	0	0	7	0	3	0	9	0	7	4
mRNA_D-dichotoma_M_contig184.5460.1	0	0	0	2	0	0	0	1	0	0	0	0	16	3	5	0	7	8	4	3	20	6	10	1	3	4	5
mRNA_D-dichotoma_M_contig185.5511.1	495	254	291	33	8	25	646	134	156	208	60	63	1941	3147	1231	1634	3598	1909	2291	1768	805	1276	4630	3048	3071	2279	1148
mRNA_D-dichotoma_M_contig186.5551.1	121	50	79	0	0	0	195	95	98	87	36	45	1087	686	1207	1452	1115	967	1325	1327	1391	1171	1210	922	1242	1244	1499
mRNA_D-dichotoma_M_contig186.5553.1	9	8	3	1	0	0	20	8	11	5	2	6	0	2	52	8	0	3	42	55	1	2	24	2	2	0	0
mRNA_D-dichotoma_M_contig186.5554.1	14	4	9	0	0	0	98	21	22	7	3	1	1	2	68	17	0	7	78	59	5	13	19	5	2	9	9
mRNA_D-dichotoma_M_contig186.5557.1	3	2	2	0	1	0	8	2	6	4	5	6	11	23	37	31	72	21	8	18	31	17	32	16	25	23	33
mRNA_D-dichotoma_M_contig186.5558.1	5	0	6	1	1	0	13	1	3	12	2	8	93	70	131	68	157	43	58	32	30	42	115	81	68	96	87
mRNA_D-dichotoma_M_contig172.4892.1	128	70	65	3	0	1	67	34	25	67	25	28	3192	6480	5089	6521	4255	3897	6182	5193	915	2206	4839	7414	5825	4042	1851
mRNA_D-dichotoma_M_contig173.4932.1	0	0	0	0	0	0	0	0	0	0	0	0	0	0	0	0	0	0	0	0	0	0	0	0	1	0	0
mRNA_D-dichotoma_M_contig4420.14121.1	0	0	0	2	0	1	1	0	0	1	0	0	6	1	3	6	2	0	4	7	1	5	23	28	32	4	19
mRNA_D-dichotoma_M_contig4420.14122.1	2	0	0	6	0	1	0	0	0	3	0	1	0	2	0	2	0	2	5	13	0	0	102	21	42	50	21
mRNA_D-dichotoma_M_contig4425.14125.1	9	6	3	57	8	11	21	4	2	24	4	9	553	899	827	923	1068	446	1100	1117	256	268	1433	1117	921	848	484
mRNA_D-dichotoma_M_contig4425.14126.1	0	0	0	1	0	0	1	0	0	2	0	0	5	19	16	22	32	5	10	8	3	8	38	14	9	8	13
mRNA_D-dichotoma_M_contig4426.14128.1	20	9	12	0	0	0	19	20	10	183	22	30	23	15	46	15	22	16	57	25	5	13	187	21	36	16	17
mRNA_D-dichotoma_M_contig4446.14165.1	3	0	0	0	3	1	1	0	0	2	0	0	0	0	0	0	0	0	1	0	0	0	0	1	0	0	0
mRNA_D-dichotoma_M_contig2402.8222.1	40	5	21	0	0	0	22	19	45	4	4	0	14169	5859	3887	9357	9392	4342	4943	3998	1396	3162	11232	8718	9262	10184	4994
mRNA_D-dichotoma_M_contig2402.8223.1	11	0	4	0	0	0	2	1	7	0	0	0	4812	552	1242	476	620	894	993	850	56	114	3268	1710	1949	391	190
mRNA_D-dichotoma_M_contig2407.8244.1	20	21	15	162	19	131	42	16	16	47	14	9	178	618	337	257	198	314	422	337	191	149	449	565	349	410	444
mRNA_D-dichotoma_M_contig2410.8262.1	17	17	15	0	0	0	44	30	15	23	11	12	380	622	1039	929	936	265	726	461	214	139	865	397	332	435	231
mRNA_D-dichotoma_M_contig2410.8263.1	2	2	0	0	0	0	1	3	3	0	1	0	0	2	14	2	0	1	14	3	1	0	59	7	9	3	5
mRNA_D-dichotoma_M_contig2410.8265.1	4	4	6	1	1	0	2	4	12	10	8	4	83	21	147	156	101	31	64	65	29	27	139	29	53	151	78
mRNA_D-dichotoma_M_contig2410.8266.1	4	0	1	0	0	0	6	7	6	6	4	5	14	22	91	73	31	19	47	32	8	11	149	32	44	42	27
mRNA_D-dichotoma_M_contig2078.6751.1	26	0	4	0	0	0	5	1	3	1	1	2	16	15	96	32	26	30	368	190	22	18	29	16	2	6	5
mRNA_D-dichotoma_M_contig2081.6767.1	6	20	4	0	0	0	20	5	2	20	2	9	383	389	484	587	452	93	192	163	45	43	214	166	120	132	107
mRNA_D-dichotoma_M_contig2082.6769.1	16	8	6	0	0	0	9	6	11	13	3	12	925	463	1120	658	452	556	488	492	122	212	1007	824	762	611	355
mRNA_D-dichotoma_M_contig2082.6771.1	11	7	6	0	0	0	28	20	29	60	20	15	805	1133	1096	1300	891	654	1166	1208	304	282	1845	1136	869	989	616
mRNA_D-dichotoma_M_contig1185.1486.1	2	1	0	1	0	0	9	1	2	8	3	1	56	42	38	30	17	13	101	52	23	15	98	85	34	24	38
mRNA_D-dichotoma_M_contig1186.1490.1	2	1	0	4	1	2	5	2	0	2	1	1	8	3	0	6	1	1	0	0	0	3	1	2	5	0	5
mRNA_D-dichotoma_M_contig3918.12942.1	0	0	0	0	0	0	0	0	0	1	0	0	2	1	1	5	2	4	0	1	2	2	1	8	6	6	5
mRNA_D-dichotoma_M_contig3918.12943.1	1	0	1	1	0	0	6	0	0	10	1	1	6	9	8	8	0	44	7	10	4	3	8	38	13	16	6
mRNA_D-dichotoma_M_contig3918.12944.1	1	7	2	0	0	0	34	1	4	39	6	9	64	18	19	49	27	45	20	60	95	74	43	46	42	30	49
mRNA_D-dichotoma_M_contig3928.12951.1	2	0	1	0	0	0	4	1	0	0	0	0	13	46	28	33	16	27	52	45	2	10	0	0	3	2	0
mRNA_D-dichotoma_M_contig3929.12954.1	17	2	8	0	0	0	15	1	5	11	0	0	69	146	75	93	124	78	221	123	80	69	117	173	141	49	49
mRNA_D-dichotoma_M_contig3930.12967.1	0	1	0	0	0	0	1	0	0	1	0	0	0	2	0	2	0	0	0	0	0	0	1	1	1	0	2
mRNA_D-dichotoma_M_contig3933.12971.1	5	0	1	0	0	0	24	3	2	9	0	0	0	0	6	7	0	0	2	1	0	0	0	0	0	0	0
mRNA_D-dichotoma_M_contig3933.12972.1	0	0	0	0	0	0	8	0	0	1	2	1	11	50	97	79	66	23	106	67	10	15	57	34	35	51	46
mRNA_D-dichotoma_M_contig3934.12974.1	110	177	68	0	0	0	142	73	78	160	67	73	85	499	515	541	298	215	498	386	128	145	313	288	345	320	152
mRNA_D-dichotoma_M_contig3272.11253.1	105	30	34	0	0	0	39	15	8	15	0	1	0	6	13	0	0	0	7	5	0	0	2	0	7	1	1
mRNA_D-dichotoma_M_contig3273.11254.1	35	6	27	1	0	1	10	16	14	7	2	5	452	258	800	1096	863	347	313	339	227	412	318	277	282	631	509
mRNA_D-dichotoma_M_contig3276.11263.1	0	0	0	0	0	0	0	0	0	0	0	0	0	0	0	0	0	0	0	0	0	0	0	0	0	0	0
mRNA_D-dichotoma_M_contig3276.11264.1	0	0	0	0	0	0	0	0	0	3	0	0	2	0	1	7	3	18	8	5	11	11	1	1	1	0	2
mRNA_D-dichotoma_M_contig3283.11293.1	280	119	98	0	2	0	280	182	173	456	102	100	351	1664	1600	1531	2144	463	1324	806	1034	870	834	826	689	873	472
mRNA_D-dichotoma_M_contig85.19286.1	2	0	2	0	0	0	6	1	2	5	0	2	0	43	71	44	54	7	26	14	13	4	9	18	6	10	8
mRNA_D-dichotoma_M_contig85.19292.1	190	102	158	3	1	2	160	142	86	35	16	23	1378	690	1817	1173	1143	1005	2321	2194	436	510	1185	973	1567	1082	629
mRNA_D-dichotoma_M_contig85.19295.1	20	10	4	28	7	4	45	5	13	28	13	6	908	524	446	347	235	255	555	459	200	233	730	499	319	320	366
mRNA_D-dichotoma_M_contig85.19296.1	35	21	16	83	15	39	8	15	10	29	20	10	222	214	283	448	487	284	431	535	143	153	620	276	222	336	391
mRNA_D-dichotoma_M_contig86.19364.1	0	0	0	0	0	0	0	0	0	0	0	0	0	0	0	3	0	0	0	0	0	0	0	0	0	0	1
mRNA_D-dichotoma_M_contig86.19366.1	1	0	0	0	0	0	3	0	0	0	0	0	115	42	28	47	30	23	37	53	33	26	20	35	20	10	21
mRNA_D-dichotoma_M_contig4791.14857.1	5	4	7	767	108	547	27	4	19	44	10	16	0	8	26	8	2	7	9	5	3	2	27	218	3	340	586
mRNA_D-dichotoma_M_contig4802.14895.1	0	0	0	121	31	33	0	0	0	0	0	0	0	0	0	0	0	0	0	0	0	0	0	0	0	0	0
mRNA_D-dichotoma_M_contig4803.14896.1	0	1	0	0	0	0	0	0	0	0	0	0	3	0	2	0	0	2	1	0	0	0	1	0	0	3	0
mRNA_D-dichotoma_M_contig4819.14925.1	111	38	68	1	0	0	338	100	46	127	22	48	1407	3011	4554	1568	3223	1791	3150	1378	2970	1601	2007	597	1480	1653	749
mRNA_D-dichotoma_M_contig401.13190.1	1	1	0	0	0	0	2	2	3	8	0	1	10	58	47	50	22	29	74	54	27	17	150	65	52	70	47
mRNA_D-dichotoma_M_contig401.13193.1	55	29	28	0	0	0	10	18	11	9	10	12	272	287	398	417	355	176	316	234	8	35	628	373	205	289	35
mRNA_D-dichotoma_M_contig401.13195.1	4	0	3	0	0	0	0	1	0	6	4	1	268	56	330	236	135	104	187	248	20	18	256	106	63	128	36
mRNA_D-dichotoma_M_contig401.13196.1	19	7	23	3	0	3	7	7	12	24	14	18	1588	547	1730	1573	945	647	1155	1603	171	302	1341	797	629	1083	359
mRNA_D-dichotoma_M_contig402.13213.1	102	74	83	30	9	14	144	80	72	201	97	85	1141	1461	2714	2244	1351	1334	1417	1257	997	747	2064	1353	1531	1419	1019
mRNA_D-dichotoma_M_contig403.13233.1	0	0	0	0	0	0	0	0	0	0	0	0	0	1	1	3	0	0	2	0	0	0	5	0	0	1	0
mRNA_D-dichotoma_M_contig404.13259.1	0	0	0	2	1	0	0	2	1	0	1	0	0	0	0	9	5	0	0	0	6	1	0	1	0	2	6
mRNA_D-dichotoma_M_contig404.13265.1	9	7	6	0	0	0	4	16	4	18	4	10	4	6	47	24	25	3	21	15	5	3	22	5	9	7	1
mRNA_D-dichotoma_M_contig1843.5480.1	0	0	0	40	10	66	0	1	0	0	0	0	0	16	0	19	0	5	6	10	5	0	17	27	17	23	66
mRNA_D-dichotoma_M_contig1844.5486.1	13	4	3	0	0	0	23	1	6	21	3	10	67	125	107	113	60	102	238	144	40	18	257	171	115	65	38
mRNA_D-dichotoma_M_contig1845.5488.1	1	0	0	0	0	0	3	0	0	6	1	0	0	0	3	0	3	1	1	1	1	0	3	1	0	0	0
mRNA_D-dichotoma_M_contig1846.5492.1	14	0	0	59	1	0	23	0	0	25	0	0	0	0	0	1	0	1	6	1	0	1	1	4	3	0	0
mRNA_D-dichotoma_M_contig1847.5494.1	0	1	1	149	26	96	0	0	1	3	0	6	16	8	23	36	39	26	39	37	14	7	67	46	46	90	167
mRNA_D-dichotoma_M_contig1848.5498.1	8	9	3	11	0	2	5	4	3	5	0	0	122	105	271	270	170	317	383	145	63	88	114	163	80	180	48
mRNA_D-dichotoma_M_contig3010.10454.1	10	1	5	138	8	54	17	4	3	1	3	0	14	182	159	83	82	53	172	222	9	7	88	79	38	67	73
mRNA_D-dichotoma_M_contig3013.10458.1	14	7	8	180	12	84	35	7	9	15	3	4	0	3	16	14	2	1	25	13	1	3	13	14	4	58	73
mRNA_D-dichotoma_M_contig3015.10464.1	1	8	2	54	26	29	6	3	1	7	0	2	4	2	2	0	0	2	18	5	0	0	47	67	2	50	71
mRNA_D-dichotoma_M_contig3016.10469.1	39	15	22	2	0	1	30	8	10	46	15	28	5603	1151	1091	1049	2144	6733	577	238	9821	7511	607	2244	2642	1140	4830
mRNA_D-dichotoma_M_contig3016.10471.1	0	0	0	0	0	0	2	0	0	0	0	0	4	19	9	30	5	13	9	3	0	1	10	12	21	17	14
mRNA_D-dichotoma_M_contig3018.10476.1	0	0	1	16	3	14	2	1	1	1	0	0	6	4	4	8	6	2	19	9	0	0	16	11	6	7	4
mRNA_D-dichotoma_M_contig3023.10495.1	6	15	5	88	32	61	33	14	15	41	14	14	538	356	286	227	64	147	236	136	79	79	1498	882	614	530	980
mRNA_D-dichotoma_M_contig3024.10501.1	0	0	0	8	0	0	0	0	0	1	0	0	0	2	0	0	0	0	0	0	0	0	0	0	2	0	0
mRNA_D-dichotoma_M_contig514.15565.1	3	0	1	0	0	0	5	2	2	2	1	2	197	373	288	702	629	257	329	278	112	164	429	500	409	570	259
mRNA_D-dichotoma_M_contig515.15576.1	0	1	0	48	7	25	2	0	0	1	1	0	0	0	0	0	0	0	1	0	0	0	2	13	0	22	55
mRNA_D-dichotoma_M_contig515.15578.1	16	4	4	26	2	18	16	4	3	16	6	1	2	2	7	1	0	1	2	5	0	0	5	8	1	38	98
mRNA_D-dichotoma_M_contig516.15591.1	19	0	15	0	0	0	2	2	3	3	2	1	0	6	18	3	0	1	6	4	0	0	5	3	0	3	0
mRNA_D-dichotoma_M_contig5503.16175.1	44	7	11	0	0	0	24	15	7	15	5	13	697	373	526	655	847	452	362	298	288	380	793	490	792	652	385
mRNA_D-dichotoma_M_contig5515.16187.1	13	0	2	3	0	0	3	3	4	4	0	4	185	398	218	346	167	282	461	303	79	70	411	291	195	151	65
mRNA_D-dichotoma_M_contig5523.16197.1	0	0	0	0	0	0	0	0	0	0	0	0	0	0	0	3	0	1	2	2	1	0	0	0	0	0	0
mRNA_D-dichotoma_M_contig5528.16201.1	0	0	0	0	0	0	0	0	0	1	0	0	0	1	1	1	0	3	2	4	0	1	1	4	1	0	1
mRNA_D-dichotoma_M_contig5535.16215.1	41	3	38	0	0	0	13	4	6	7	0	1	19	8	204	77	21	23	264	135	6	33	10	0	5	3	8
mRNA_D-dichotoma_M_contig5536.16218.1	0	0	0	0	0	0	0	0	0	1	0	0	0	0	0	1	0	0	0	2	0	0	0	1	2	1	1
mRNA_D-dichotoma_M_contig5541.16230.1	0	0	0	0	0	0	0	0	0	0	0	0	0	0	0	0	0	0	0	0	0	0	0	0	0	0	0
mRNA_D-dichotoma_M_contig1538.3797.1	13	3	4	1	0	0	21	6	2	15	4	2	197	194	299	128	84	226	328	283	22	44	276	350	314	46	48
mRNA_D-dichotoma_M_contig1539.3804.1	54	42	32	0	0	0	42	27	45	11	6	3	0	0	8	1	0	4	9	19	0	0	0	0	0	0	0
mRNA_D-dichotoma_M_contig1539.3808.1	49	26	13	0	0	0	45	30	61	13	5	5	0	0	9	5	0	0	13	7	1	0	0	1	0	0	0
mRNA_D-dichotoma_M_contig1539.3810.1	0	0	0	3	0	2	4	0	0	20	4	2	83	66	37	88	42	144	93	99	45	33	81	83	49	50	127
mRNA_D-dichotoma_M_contig1541.3826.1	3	0	1	0	0	0	5	0	0	4	0	0	9	26	23	26	37	4	13	6	3	3	17	31	31	27	7
mRNA_D-dichotoma_M_contig287.9898.1	35	10	14	5	1	1	30	13	15	18	7	11	1425	509	1243	710	515	457	797	702	157	240	805	704	698	422	360
mRNA_D-dichotoma_M_contig287.9906.1	7	1	2	0	0	0	11	3	2	12	0	3	244	85	346	120	121	107	194	164	18	16	189	146	131	74	47
mRNA_D-dichotoma_M_contig287.9908.1	46	45	26	0	3	0	61	28	37	30	14	11	200	295	340	533	295	218	871	685	224	194	439	387	358	366	342
mRNA_D-dichotoma_M_contig288.9934.1	0	0	4	89	57	54	4	3	8	8	2	1	129	389	329	424	244	243	600	462	60	33	755	443	296	355	214
mRNA_D-dichotoma_M_contig288.9939.1	58	40	42	27	20	13	103	35	110	277	98	111	1650	961	1934	2267	1241	838	1552	1651	738	492	2022	1239	1223	1429	944
mRNA_D-dichotoma_M_contig289.9964.1	0	0	0	29	1	26	1	0	0	0	0	0	0	0	1	5	0	0	2	1	4	0	0	7	0	25	79
mRNA_D-dichotoma_M_contig289.9965.1	0	1	0	60	24	31	0	0	0	1	0	0	0	1	0	0	0	3	1	1	1	0	1	3	1	54	72
mRNA_D-dichotoma_M_contig289.9966.1	0	0	0	20	9	21	0	0	0	0	0	0	0	5	3	6	12	1	6	5	2	9	4	11	1	22	17
mRNA_D-dichotoma_M_contig289.9967.1	1	0	0	20	4	16	0	0	0	0	0	0	0	5	2	3	0	0	2	0	1	0	0	1	1	2	20
mRNA_D-dichotoma_M_contig289.9969.1	3	0	0	44	13	20	1	0	0	0	1	0	3	9	7	9	12	4	12	6	0	7	8	16	4	22	46
mRNA_D-dichotoma_M_contig289.9971.1	6	5	0	39	8	17	5	1	6	4	3	0	227	265	457	527	386	222	395	372	74	87	418	322	291	300	170
mRNA_D-dichotoma_M_contig289.9974.1	2	0	0	0	0	0	0	0	0	1	0	0	10	12	29	34	37	24	32	36	1	2	55	52	22	14	7
mRNA_D-dichotoma_M_contig289.9978.1	56	45	45	22	3	12	41	38	74	114	71	59	1655	1092	2085	1807	1348	834	1115	1074	594	562	1522	1222	972	1242	845
mRNA_D-dichotoma_M_contig5433.16067.1	0	0	2	0	0	0	0	0	0	0	0	0	0	0	0	0	52	0	2	1	0	0	0	0	0	0	0
mRNA_D-dichotoma_M_contig5446.16079.1	1	0	0	0	0	0	1	0	0	0	0	0	0	0	0	0	0	0	0	0	0	0	0	0	0	0	0
mRNA_D-dichotoma_M_contig5446.16080.1	0	0	0	2	2	0	1	0	0	1	0	0	0	3	3	7	1	3	7	3	2	1	5	2	3	2	1
mRNA_D-dichotoma_M_contig5457.16085.1	0	0	0	0	0	0	0	0	0	0	0	0	1	4	1	6	14	3	12	7	2	8	1	1	1	8	0
mRNA_D-dichotoma_M_contig5462.16098.1	0	0	0	0	1	0	0	0	0	1	0	0	0	1	0	0	0	1	1	0	0	0	0	0	1	0	0
mRNA_D-dichotoma_M_contig5475.16117.1	1	0	0	0	0	0	1	0	0	0	0	0	82	137	132	359	153	86	304	279	58	67	3	5	9	7	5
mRNA_D-dichotoma_M_contig5477.16118.1	140	271	111	2	0	2	192	214	142	120	53	49	515	2961	1936	3684	2952	639	1340	887	348	356	2433	2906	1893	1813	722
mRNA_D-dichotoma_M_contig5481.16141.1	478	238	243	0	0	0	105	391	259	116	25	65	89	878	2312	883	1417	149	609	322	48	51	142	278	154	124	42
mRNA_D-dichotoma_M_contig591.16777.1	10	1	1	0	0	0	19	2	0	2	0	2	0	0	0	0	0	0	0	1	0	0	1	0	0	0	0
mRNA_D-dichotoma_M_contig592.16782.1	10	14	3	18	3	17	8	8	8	24	8	11	229	245	400	431	19	108	190	85	37	332	531	468	500	367	433
mRNA_D-dichotoma_M_contig592.16789.1	12	4	7	872	82	387	9	3	1	13	3	4	70	98	136	135	277	69	195	151	40	35	319	135	82	116	57
mRNA_D-dichotoma_M_contig28.9655.1	0	0	0	1	0	0	12	1	0	2	1	1	111	220	62	171	43	71	192	179	10	32	251	74	72	88	44
mRNA_D-dichotoma_M_contig28.9667.1	29	14	25	19	7	7	39	33	30	35	16	29	4289	1609	5996	4821	4112	1588	2196	2755	1986	2419	2965	2371	1941	3709	3734
mRNA_D-dichotoma_M_contig28.9677.1	21	4	4	20	6	7	19	7	2	9	4	3	0	13	82	21	1	9	65	29	10	2	43	23	6	11	59
mRNA_D-dichotoma_M_contig28.9679.1	0	0	0	1	0	0	0	0	0	0	0	0	0	1	0	0	0	0	0	1	0	1	0	0	4	2	0
mRNA_D-dichotoma_M_contig309.10687.1	0	0	1	1	2	2	0	0	1	0	0	0	6	3	6	6	5	5	7	6	2	3	7	17	14	14	2
mRNA_D-dichotoma_M_contig309.10689.1	20	17	22	46	22	20	12	18	25	69	44	37	559	590	585	115	74	353	449	590	68	49	599	318	168	137	98
mRNA_D-dichotoma_M_contig309.10690.1	13	7	8	11	7	3	5	7	11	34	7	15	197	255	252	57	26	148	166	238	21	16	185	97	65	33	25
mRNA_D-dichotoma_M_contig309.10691.1	13	2	13	50	12	30	5	6	13	24	23	19	95	90	91	54	36	36	50	91	65	15	112	36	13	59	50
mRNA_D-dichotoma_M_contig309.10694.1	11	8	1	16	1	7	14	3	4	11	2	5	0	2	10	0	4	0	1	3	3	0	1	1	3	4	10
mRNA_D-dichotoma_M_contig310.10728.1	0	0	0	0	0	0	0	0	0	0	0	0	0	0	0	0	0	0	0	0	0	0	0	0	1	0	0
mRNA_D-dichotoma_M_contig310.10729.1	35	11	24	152	117	122	11	11	16	14	3	7	625	434	563	550	423	531	478	525	479	477	494	427	528	564	486
mRNA_D-dichotoma_M_contig310.10740.1	10	12	26	0	1	0	27	29	32	69	22	25	174	188	388	291	256	175	295	243	301	265	339	198	193	290	612
mRNA_D-dichotoma_M_contig310.10741.1	19	4	10	0	0	0	14	23	30	27	29	39	268	108	697	417	466	164	318	309	205	242	355	237	179	284	623
mRNA_D-dichotoma_M_contig310.10745.1	4	3	5	0	0	0	6	6	12	23	7	12	200	115	227	553	455	263	294	336	254	264	423	255	182	439	436
mRNA_D-dichotoma_M_contig580.16647.1	108	74	45	0	0	0	125	54	37	39	10	10	438	548	868	653	276	570	854	913	430	359	771	635	553	494	459
mRNA_D-dichotoma_M_contig582.16663.1	9	0	2	67	7	16	5	4	1	5	2	5	119	84	233	37	32	144	129	118	10	16	201	114	180	35	21
mRNA_D-dichotoma_M_contig582.16665.1	0	0	0	0	0	0	0	0	0	0	0	0	1	5	15	18	0	2	167	206	0	3	12	11	5	6	17
mRNA_D-dichotoma_M_contig1280.2144.1	16	16	25	0	0	0	28	21	14	12	5	7	2595	1682	2372	3691	2181	1163	1461	1547	570	788	1916	2710	1501	2742	2137
mRNA_D-dichotoma_M_contig1282.2159.1	15	1	4	3	0	0	5	1	2	6	1	3	229	115	485	348	351	165	264	328	35	70	452	232	167	216	107
mRNA_D-dichotoma_M_contig1283.2166.1	34	5	20	0	0	0	8	2	2	2	0	0	57	4	571	62	45	22	149	108	0	6	0	0	1	2	0
mRNA_D-dichotoma_M_contig1285.2176.1	16	5	4	11169	3020	3965	25	12	12	5	0	2	7	8	8	3	0	1	19	21	0	6	28	33	2	48	40
mRNA_D-dichotoma_M_contig1285.2177.1	15	1	5	1923	965	784	28	9	4	9	0	0	0	0	4	7	0	3	8	3	0	4	11	13	2	18	26
mRNA_D-dichotoma_M_contig1285.2179.1	20	15	22	23	23	16	6	5	3	8	2	4	68	155	456	500	298	272	289	254	456	173	131	168	60	125	619
mRNA_D-dichotoma_M_contig1286.2183.1	1	0	1	0	0	0	0	0	0	2	0	0	7	0	6	2	9	0	4	4	0	1	6	4	9	4	3
mRNA_D-dichotoma_M_contig1286.2187.1	0	0	0	0	0	0	0	0	0	0	0	0	2	5	3	3	14	2	1	0	0	0	3	0	3	5	1
mRNA_D-dichotoma_M_contig596.16813.1	7	3	0	0	0	1	9	2	1	2	2	2	140	92	294	54	108	3	71	18	20	1	47	13	8	9	4
mRNA_D-dichotoma_M_contig596.16814.1	0	0	0	7	0	0	1	0	0	8	0	0	0	2	0	0	0	0	4	0	0	0	13	0	1	3	0
mRNA_D-dichotoma_M_contig1054.509.1	2	0	0	0	0	0	0	0	0	0	0	0	0	1	0	0	0	0	1	0	0	0	0	1	0	0	2
mRNA_D-dichotoma_M_contig1055.519.1	234	110	153	410	52	214	150	87	108	143	70	89	871	771	1364	1136	819	643	1066	951	1060	766	1721	836	772	926	1071
mRNA_D-dichotoma_M_contig1056.523.1	9	7	3	0	0	0	7	7	0	5	2	1	173	184	243	585	476	184	201	249	260	224	262	204	229	477	319
mRNA_D-dichotoma_M_contig1056.524.1	9	2	5	0	0	0	3	4	2	2	2	3	424	161	480	562	651	228	436	415	106	173	398	356	292	399	238
mRNA_D-dichotoma_M_contig1059.537.1	0	0	0	0	0	0	0	0	0	0	0	0	0	0	0	0	0	0	0	0	0	0	2	4	2	9	1
mRNA_D-dichotoma_M_contig2979.10287.1	33	13	26	2	0	0	85	23	27	84	30	40	363	334	295	626	450	292	273	225	81	140	776	492	455	555	192
mRNA_D-dichotoma_M_contig2980.10300.1	0	0	0	0	0	0	0	0	0	0	0	0	0	0	3	0	0	2	1	0	0	0	6	2	0	0	0
mRNA_D-dichotoma_M_contig2980.10301.1	0	0	0	0	0	0	1	0	0	0	0	0	0	0	0	0	0	0	0	0	0	0	0	1	1	0	0
mRNA_D-dichotoma_M_contig2984.10307.1	14	7	7	0	0	0	23	2	2	14	1	4	18	63	16	22	14	114	3	6	6	18	17	87	53	11	25
mRNA_D-dichotoma_M_contig2800.9692.1	51	11	18	2	0	0	70	5	13	18	2	3	0	0	0	0	0	0	0	2	0	1	0	0	0	0	0
mRNA_D-dichotoma_M_contig2805.9700.1	0	0	0	0	0	0	0	0	0	0	0	0	15	0	6	4	0	2	3	5	0	0	13	15	10	20	12
mRNA_D-dichotoma_M_contig2808.9707.1	0	0	0	0	0	0	0	0	0	0	0	0	0	0	1	2	0	0	1	0	0	0	0	0	1	0	0
mRNA_D-dichotoma_M_contig305.10561.1	0	0	0	0	0	0	0	0	0	0	0	0	121	1655	197	285	1205	225	98	58	14	44	259	453	170	308	79
mRNA_D-dichotoma_M_contig306.10586.1	13	8	2	0	0	0	2	7	1	17	1	4	331	429	358	186	143	452	627	474	48	91	608	578	396	150	127
[truncated: 18,585 more rows]
