# Supplementary material for: Life-cycle-related gene expression patterns in the brown algae
Source: bioRxiv preprint, doi:10.1101/2025.04.25.649966, version 3 (2025-08-12)
Supplement: Table S10 [file 649966_file29.xlsx]

## Sheet: TableST5_Complete_gene_info_Dic
Gene		Trancript abundance in individual RNA-seq samples (normalised counts calculated by DESeq2 using the median of ratios method)																											Gene expression modules
gene_id	Orthogroup (Ectocarpus species 7 vs. D. dichotoma comparison, Table S7)	Dictyota_FEMALE_eggs_Rep1	Dictyota_FEMALE_eggs_Rep2	Dictyota_FEMALE_eggs_Rep3	Dictyota_MALE_sperm_Rep1	Dictyota_MALE_sperm_Rep2	Dictyota_MALE_sperm_Rep3	Dictyota_SP_zygote_Rep1	Dictyota_SP_zygote_Rep2	Dictyota_SP_zygote_Rep3	Dictyota_SP_embryo_Rep1	Dictyota_SP_embryo_Rep2	Dictyota_SP_embryo_Rep3	Dictyota_SP_Rep1	Dictyota_SP_Rep2	Dictyota_SP_Rep3	Dictyota_SP_Rep4	Dictyota_SP_Rep5	Dictyota_FEMALE_Rep1	Dictyota_FEMALE_Rep2	Dictyota_FEMALE_Rep3	Dictyota_FEMALE_Rep4	Dictyota_FEMALE_Rep5	Dictyota_MALE_Rep1	Dictyota_MALE_Rep2	Dictyota_MALE_Rep3	Dictyota_MALE_Rep4	Dictyota_MALE_Rep5	WGCNA module assignment (colour)	green module membership (MM) score	blue module membership (MM) score	turquoise module membership (MM) score	brown module membership (MM) score	magenta module membership (MM) score	black module membership (MM) score	pink module membership (MM) score	red module membership (MM) score	yellow module membership (MM) score	grey module membership (MM) score	green module membership score p-value (pMM)	blue module membership score p-value (pMM)	turquoise module membership score p-value (pMM)	brown module membership score p-value (pMM)	magenta module membership score p-value (pMM)	black module membership score p-value (pMM)	pink module membership score p-value (pMM)	red module membership score p-value (pMM)	yellow module membership score p-value (pMM)	grey module membership score p-value (pMM)
D-dichotoma_M_contig375.12517.1	OG0000598	6.30116	5.01986	5.5702	6.97106	5.99322	5.58975	7.08851	4.91865	6.47874	8.95242	7.80475	8.49155	8.53734	8.22898	7.32708	7.60978	7.70118	7.08953	8.23865	8.07295	5.20579	6.74551	8.78446	8.56314	8.48792	8.11654	6.8289	turquoise	-0.355122	0.0369585	0.358885	-0.26693	-0.307862	0.452628	0.643858	0.293414	0.566696	0.601079	0.0691068	0.854785	0.0660078	0.178319	0.118236	0.0177563	0.000290382	0.137438	0.00205675	0.000913917
D-dichotoma_M_contig375.12518.1	OG0009249	2.67116	0	2.38634	8.52637	8.09117	6.94971	3.73137	0	0	5.55175	3.47482	5.61048	2.52902	2.7034	1.8046	2.84997	1.08869	3.19127	2.88112	2.76925	2.64264	2.3513	4.06551	3.56356	3.49174	3.05803	1.75018	turquoise	0.605139	-0.677635	-0.756467	-0.189648	-0.410855	0.696689	0.247675	-0.414297	-0.243975	0.304492	0.000825393	0.000103128	4.99429e-06	0.343411	0.0332646	5.41363e-05	0.212919	0.0316745	0.220055	0.122527
D-dichotoma_M_contig375.12520.1	OG0000599	5.16596	5.01986	5.5702	6.22001	6.7211	4.87262	4.83965	4.35734	5.0056	5.65647	4.97057	5.04021	6.16235	7.88729	6.67967	6.93829	6.86276	6.69569	7.75152	7.51851	6.19409	5.86887	7.21669	6.77424	6.23915	6.28842	6.18925	brown	-0.438401	-0.356373	0.202766	-0.753334	-0.574932	0.556749	0.389638	0.115164	0.763349	-0.0142874	0.0221732	0.0680645	0.310424	5.75121e-06	0.00170717	0.00255947	0.0445358	0.56732	3.63573e-06	0.943613
D-dichotoma_M_contig376.12538.1	OG0009250	0	2.64168	3.24132	4.56247	0	0	2.8361	2.5544	3.50777	3.9189	0	4.63971	6.07824	4.83626	5.84438	6.91008	6.80869	5.57171	5.18657	5.70086	5.78296	5.629	5.17471	4.58493	4.18881	5.99372	6.04175	yellow	-0.651662	0.0127192	0.559759	-0.538288	-0.0506212	0.198976	0.320214	0.545215	0.789091	0.0257112	0.000231167	0.949794	0.00239727	0.0037747	0.802008	0.319744	0.10345	0.00327102	1.00303e-06	0.898704
D-dichotoma_M_contig376.12539.1	OG0009251	3.55322	4.06365	4.16295	4.56247	5.41954	6.06659	3.35209	5.13421	5.57551	3.53532	6.81119	4.0834	7.30806	5.72029	7.09307	6.3878	6.39504	6.6521	6.35024	6.70251	5.36961	5.07992	6.53167	6.20175	5.33507	5.59106	5.59336	brown	-0.390523	-0.33137	0.171724	-0.657919	-0.483516	0.505161	0.362895	0.220964	0.611913	0.0958081	0.0440123	0.0913234	0.391738	0.000191648	0.0106155	0.00719598	0.0628249	0.268038	0.000694243	0.634521
D-dichotoma_M_contig376.12543.1	OG0000600	10.1573	10.1723	10.2106	0	0	0	8.84076	10.2289	9.70766	7.18771	7.43467	8.32213	8.49789	7.5173	8.51747	8.28559	7.31473	7.2629	8.08115	8.06454	7.42676	6.81884	7.8107	7.61338	6.98359	7.28116	7.48242	blue	-0.628038	0.921417	0.872426	0.445246	0.44172	-0.779388	-0.232125	0.416101	0.165812	-0.0610262	0.000452493	9.2945e-12	3.0204e-09	0.0199479	0.0210702	1.66242e-06	0.243985	0.0308658	0.408486	0.762363
D-dichotoma_M_contig377.12555.1	OG0009252	0	0	0	0	0	0	0	0	0	2.17994	0	0	0	1.20958	0.236455	0	0	0	0.844711	0.740931	0	0	0.428685	1.48742	0.302097	0	0	NA	NA	NA	NA	NA	NA	NA	NA	NA	NA	NA	NA	NA	NA	NA	NA	NA	NA	NA	NA	NA
D-dichotoma_M_contig377.12559.1	OG0009253	0	0	0	0	0	0	0	0	0	2.17994	0	0	3.22507	3.27259	3.47915	1.83066	3.18793	2.52814	3.73731	2.86097	0	2.12329	2.58907	3.11545	2.43983	1.44589	1.95953	NA	NA	NA	NA	NA	NA	NA	NA	NA	NA	NA	NA	NA	NA	NA	NA	NA	NA	NA	NA	NA
D-dichotoma_M_contig1230.1828.1	OG0009254	5.27	5.23588	4.72082	0	0	0	3.35209	0	4.75152	6.16243	6.52453	6.33559	8.06342	6.08077	6.76955	6.91664	6.90135	6.54783	5.57771	6.09957	7.47663	5.85034	7.97942	6.78902	6.1378	7.201	7.71482	turquoise	-0.771296	0.42398	0.822433	-0.200839	0.161203	-0.0670374	0.340877	0.499714	0.703594	0.295651	2.48656e-06	0.0275261	1.41679e-07	0.315141	0.421817	0.739717	0.0818623	0.00795411	4.23443e-05	0.134326
D-dichotoma_M_contig1230.1830.1	OG0009255	0	0	2.38634	0	0	0	2.8361	0	2.62933	3.01127	5.37406	0	5.25626	3.64982	3.98019	3.98131	3.66889	3.64386	2.25718	2.90473	3.83931	2.80069	5.39238	3.64382	3.43072	3.53125	3.84761	NA	NA	NA	NA	NA	NA	NA	NA	NA	NA	NA	NA	NA	NA	NA	NA	NA	NA	NA	NA	NA
D-dichotoma_M_contig1232.1839.1	OG0000601	10.0914	10.2978	10.2562	11.1518	12.4625	10.6222	10.6555	9.87917	10.5756	10.6253	11.019	10.9564	10.9363	10.7232	10.1886	10.6616	10.1476	10.4094	10.6165	10.6404	10.715	10.5946	11.1042	10.4914	10.1008	10.4336	10.7408	turquoise	0.404241	-0.526251	-0.580042	-0.196599	-0.229314	0.574186	0.16773	-0.701939	-0.150034	0.294092	0.0365006	0.00480746	0.00151711	0.325679	0.249904	0.00173657	0.40301	4.494e-05	0.455092	0.136489
D-dichotoma_M_contig1232.1840.1	OG0009256	7.10769	7.75398	7.54724	8.31198	9.38759	7.82887	7.08851	6.82155	8.16142	7.75764	7.73794	8.64315	7.8577	7.02134	7.26161	6.65425	5.9921	6.84748	7.19624	7.41639	5.95232	5.89624	7.50199	6.61077	5.98701	6.0558	6.12555	turquoise	0.58729	-0.180194	-0.615485	0.357267	-0.209904	0.152543	-0.140736	-0.602734	-0.645944	0.17974	0.00127897	0.368438	0.000632698	0.0673267	0.293328	0.447498	0.483814	0.000876879	0.000273378	0.369665
D-dichotoma_M_contig1234.1853.1	OG0000602	7.89029	8.56347	8.31344	12.489	13.3134	12.5642	8.95227	9.08226	9.6714	9.27377	9.87954	9.72531	9.15733	8.73933	9.52355	9.27522	8.78875	8.7173	8.83998	9.10058	8.67125	8.49706	8.90911	9.21328	8.65313	9.48587	8.65139	turquoise	0.765868	-0.777757	-0.93277	-0.181256	-0.346956	0.637635	0.142326	-0.573005	-0.420167	0.103889	3.22845e-06	1.80535e-06	1.40701e-12	0.365573	0.0762166	0.000346751	0.478838	0.00178398	0.0291038	0.606081
D-dichotoma_M_contig1234.1854.1	OG0009257	0	0	0	3.62227	5.41954	4.31207	0	0	0	2.17994	5.37406	3.16609	1.28187	0.608885	0.617565	0.791248	0	0.642448	0.483315	0.740931	0	0	0.230207	1.88979	2.37652	0.896975	1.0361	NA	NA	NA	NA	NA	NA	NA	NA	NA	NA	NA	NA	NA	NA	NA	NA	NA	NA	NA	NA	NA
D-dichotoma_M_contig1235.1858.1	OG0009258	2.67116	2.64168	2.38634	7.82837	0	8.41172	4.98661	2.5544	5.85951	4.22163	0	4.63971	1.28187	0	2.924	1.49898	0	0.880852	2.84162	2.32985	0	0	2.36515	2.40169	0.949901	2.00632	3.01651	turquoise	0.694079	-0.202967	-0.507497	0.270537	-0.0455348	0.0630106	-0.0987587	0.119423	-0.519105	-0.0230155	5.9302e-05	0.309934	0.00689004	0.172302	0.82157	0.754865	0.624075	0.552974	0.00552717	0.909279
D-dichotoma_M_contig1235.1859.1	OG0009259	3.85035	0	4.72082	9.28376	5.99322	9.63169	5.73328	4.66512	7.19227	5.18244	4.97057	5.04021	3.63835	0.838041	4.79255	2.37873	0	0.880852	4.01098	3.68469	0.853502	2.12329	3.71262	3.44908	2.24091	2.34915	4.51106	turquoise	0.808495	-0.364792	-0.707425	0.220398	-0.16051	0.241142	-0.0475316	-0.249496	-0.594024	0.113558	3.36132e-07	0.0613616	3.68388e-05	0.269296	0.423842	0.225628	0.813877	0.209466	0.00108742	0.572773
D-dichotoma_M_contig1235.1860.1	OG0000603	7.89029	7.71852	8.25474	2.73491	0	0	7.27166	7.93494	7.33815	7.22223	6.52453	6.70997	8.92356	9.11351	9.06272	9.95023	9.62487	9.07107	8.87587	8.95727	6.6002	8.07839	9.44069	9.55	9.64001	9.61719	8.14787	turquoise	-0.83221	0.622946	0.951068	-0.0587353	0.133636	-0.358571	0.169054	0.621832	0.650063	0.00222237	7.3838e-08	0.000519295	2.93111e-14	0.771046	0.506353	0.0662623	0.399253	0.000535019	0.00024235	0.991222
D-dichotoma_M_contig1235.1866.1	OG0000014	0	2.64168	0	0	4.45286	0	0	0	0	4.87041	0	0	3.02816	3.52376	1.16778	3.14627	1.70204	2.66204	3.06387	2.90473	1.77427	2.54814	3.46391	3.29189	2.37652	2.85811	1.75018	NA	NA	NA	NA	NA	NA	NA	NA	NA	NA	NA	NA	NA	NA	NA	NA	NA	NA	NA	NA	NA
D-dichotoma_M_contig1533.3777.1	OG0009260	5.90842	5.01986	4.46868	0	0	0	5.96367	5.48762	4.75152	5.18244	3.47482	5.35334	7.94829	8.48192	6.36126	6.83128	7.01883	8.46243	7.8838	7.43889	9.06055	8.48209	7.41983	8.38971	8.72795	7.60243	6.98063	turquoise	-0.901746	0.445298	0.907152	-0.278433	0.0363767	-0.216845	0.123815	0.565994	0.79756	-0.0186241	1.36045e-10	0.0199317	6.91039e-11	0.159632	0.857047	0.277287	0.538362	0.00208918	6.31418e-07	0.926537
D-dichotoma_M_contig1534.3779.1	OG0009261	0	0	0	0	0	0	0	0	0	0	0	0	1.41691	0.336329	0.617565	0.449203	0	0	0	0	0	0	0.603131	1.08911	1.92418	0.719506	0	NA	NA	NA	NA	NA	NA	NA	NA	NA	NA	NA	NA	NA	NA	NA	NA	NA	NA	NA	NA	NA
D-dichotoma_M_contig11.869.1	OG0009262	0	4.06365	3.24132	0	0	0	2.8361	0	0	4.47172	0	5.04021	5.75401	4.44233	5.79896	5.52137	6.05213	4.46183	5.39876	5.27016	4.60878	4.3763	4.76147	4.84472	4.51702	5.57157	5.42717	turquoise	-0.708733	0.152054	0.664416	-0.446087	-0.0623538	0.144375	0.38687	0.452277	0.803028	0.128742	3.51107e-05	0.448973	0.000157023	0.0196876	0.757345	0.472466	0.0462058	0.0178558	4.62914e-07	0.522185
D-dichotoma_M_contig368.12328.1	OG0009263	0	0	0	0	0	0	0	0	0	0	0	0	0.966698	1.50476	3.25528	2.52324	0	0	3.16335	1.88167	0	0	5.90258	2.62904	1.92418	2.00632	3.06259	yellow	-0.298233	-0.0897028	0.33996	-0.479825	-0.400029	0.301807	0.554226	0.310088	0.634798	0.0575593	0.130799	0.656354	0.0827407	0.011316	0.0386884	0.126027	0.00270256	0.115463	0.000375482	0.775513
D-dichotoma_M_contig368.12329.1	OG0009264	0	0	0	0	6.40259	0	0	0	0	0	0	0	0	1.03574	1.72911	1.4026	1.79866	0.356693	2.42693	0.533566	1.14426	1.08335	4.51086	1.08911	0.551757	0.517103	0.609128	blue	0.00499133	-0.410134	-0.233554	-0.42523	-0.384343	0.426785	0.232882	-0.579707	0.215147	-0.0352462	0.980287	0.0336058	0.241013	0.0270243	0.047773	0.0264106	0.242408	0.00152898	0.281158	0.861447
D-dichotoma_M_contig368.12330.1	OG0000604	3.17858	4.76569	3.24132	0	0	0	2.8361	5.63641	3.50777	0	4.97057	0	3.11018	5.42648	4.8824	5.5328	4.79795	4.2863	4.50388	3.91613	4.02952	1.51849	3.34613	5.03533	4.69622	4.57575	3.27323	turquoise	-0.63246	0.422862	0.688384	-0.111784	0.0553346	-0.319343	0.0676502	0.42549	0.479707	-0.183564	0.000400704	0.0279816	7.21144e-05	0.57882	0.783984	0.104446	0.73742	0.0269211	0.0113391	0.359397
D-dichotoma_M_contig368.12332.1	OG0009265	0	2.64168	0	10.3899	10.0872	9.77835	2.02518	3.96558	2.62933	0	0	0	0	0	1.27784	0.242014	0	0	0.261803	0.29131	0.488969	0	0.428685	0.293353	0.551757	0	0.336476	turquoise	0.820385	-0.71317	-0.956241	-0.0794526	-0.30743	0.375665	-0.0880559	-0.528097	-0.557317	-0.23505	1.61595e-07	2.97732e-05	7.45864e-15	0.693628	0.11878	0.053477	0.662292	0.00463508	0.00252816	0.237926
D-dichotoma_M_contig368.12336.1	OG0009266	4.30692	0	0	0	0	0	0	0	0	2.17994	0	0	1.85778	3.94857	1.47557	3.51231	3.47784	3.19127	2.80101	2.61971	3.91843	3.60757	3.0167	3.47856	3.52131	3.05803	4.02102	NA	NA	NA	NA	NA	NA	NA	NA	NA	NA	NA	NA	NA	NA	NA	NA	NA	NA	NA	NA	NA
D-dichotoma_M_contig369.12366.1	OG0009267	6.64867	5.23588	5.9116	0	0	0	5.24204	3.42606	6.56031	3.9189	0	0	2.74979	0.608885	5.46267	3.55777	0	1.2645	3.06387	3.55337	0.853502	1.31727	0	1.48742	0	0	2.37926	blue	-0.0464016	0.58252	0.27526	0.537478	0.265226	-0.715819	-0.517985	0.0665153	-0.296557	-0.385896	0.818228	0.00143171	0.164642	0.00383769	0.181211	2.6942e-05	0.00564785	0.741676	0.133081	0.0468048
D-dichotoma_M_contig369.12377.1	OG0000605	7.1355	6.92521	7.04524	0	0	0	7.24271	6.88242	7.66753	7.91368	7.92974	8.3923	6.14299	6.53335	7.5242	7.29609	6.94158	6.50837	6.58064	6.52461	6.2939	6.47613	7.64602	6.51443	6.44602	6.98481	6.9716	turquoise	-0.685579	0.889512	0.923497	0.368169	0.477841	-0.567502	-0.00980804	0.45874	0.308106	0.276114	7.92828e-05	5.50948e-10	6.72304e-12	0.0588221	0.0117082	0.00202002	0.961275	0.0160951	0.117929	0.163282
D-dichotoma_M_contig370.12416.1	OG0009268	5.45797	4.06365	4.72082	0	0	0	4.03141	6.11352	4.44292	5.03484	5.94738	5.82865	3.79534	2.91906	4.83818	3.34087	2.33814	2.66204	4.04615	3.91613	2.81795	2.54814	2.36515	2.20406	0.551757	1.75315	1.95953	blue	-0.290788	0.854199	0.523805	0.720619	0.460417	-0.661784	-0.3902	0.170587	-0.246992	0.253335	0.141157	1.44625e-08	0.00504435	2.24175e-05	0.0156626	0.00017032	0.0442025	0.394927	0.214225	0.202309
D-dichotoma_M_contig474.14776.1	OG0009269	5.45797	6.11119	5.9116	0	0	3.38293	6.33684	5.48762	6.09669	6.01267	6.52453	6.47146	2.52902	4.45964	3.58999	4.16878	3.83757	3.67587	4.43919	4.2573	5.26754	5.15735	3.9572	4.14453	3.49174	4.60159	4.31558	blue	-0.283249	0.87683	0.599405	0.691951	0.721258	-0.719216	-0.348399	0.335666	-0.177058	0.246042	0.152237	1.99589e-09	0.000952746	6.3831e-05	2.18686e-05	2.36635e-05	0.0749205	0.0869511	0.37697	0.216049
D-dichotoma_M_contig475.14784.1	OG0009270	3.17858	3.52119	3.24132	0	0	0	2.02518	5.32171	5.57551	4.68479	3.47482	4.0834	3.89125	4.52691	5.28955	4.32156	5.13976	3.0022	4.55363	4.2573	4.13267	2.54814	4.13818	2.87058	2.55867	2.90037	3.87369	turquoise	-0.662385	0.693868	0.787805	0.20585	0.323146	-0.435982	-0.0143673	0.415799	0.324783	0.177431	0.000167203	5.97366e-05	1.07406e-06	0.302963	0.100153	0.0230065	0.943298	0.0309999	0.0983458	0.375947
D-dichotoma_M_contig475.14787.1	OG0000606	10.7202	8.75063	10.7779	14.0605	13.3571	14.2199	8.32339	9.21834	9.75173	5.7541	5.37406	4.63971	5.47325	1.85814	8.06109	6.33328	0.536773	4.69841	6.80002	7.30241	3.47067	5.12687	4.20737	4.86719	2.01012	7.41654	6.1471	turquoise	0.823159	-0.358892	-0.761269	0.235165	-0.112787	-0.0176102	-0.379118	-0.440848	-0.712427	-0.381299	1.35169e-07	0.0660022	4.00644e-06	0.237689	0.5754	0.930527	0.051147	0.0213553	3.06125e-05	0.0497163
D-dichotoma_M_contig476.14800.1	OG0009271	0	0	0	7.89846	0	7.56711	2.02518	0	0	3.01127	0	0	6.97205	7.20711	7.23457	5.85304	6.45926	0.356693	0	0	0	0.457315	7.75055	8.02157	7.81282	6.56948	6.80876	pink	0.0103702	-0.464381	-0.0608661	-0.581317	-0.407777	0.541889	0.854887	0.359219	0.473009	0.0332119	0.959057	0.014678	0.76297	0.00147261	0.0347404	0.00350519	1.36862e-08	0.0657386	0.0127107	0.869375
D-dichotoma_M_contig476.14803.1	OG0009272	0	0	0	7.50803	7.20261	6.25655	0	0	0	0	0	0	0	0	0	0	0	0	0	0	0	0	0.75874	1.08911	0.302097	1.75315	0	turquoise	0.783182	-0.856986	-0.95413	-0.281716	-0.414369	0.599252	0.125843	-0.508245	-0.371513	-0.130642	1.36854e-06	1.1544e-08	1.32896e-14	0.154564	0.0316418	0.000956367	0.531675	0.00679445	0.0563882	0.516012
D-dichotoma_M_contig10.41.1	OG0000607	5.77332	6.65207	6.18747	14.2327	14.262	14.425	5.89089	6.38995	4.44292	7.35264	7.66789	7.39659	1.75954	4.15401	4.28702	5.54977	4.21554	4.83227	4.58984	4.82261	1.93512	4.15253	2.74612	4.30124	4.61626	6.48868	4.38976	turquoise	0.885406	-0.595881	-0.939235	0.0951942	-0.159523	0.389004	-0.04265	-0.551352	-0.652172	0.0296643	8.49615e-10	0.00103918	4.11901e-13	0.636704	0.426733	0.0449138	0.832711	0.00287386	0.000227702	0.883228
D-dichotoma_M_contig10.42.1	OG0009273	0	0	0	12.0435	11.1275	11.4377	2.8361	2.5544	3.50777	4.68479	5.37406	3.16609	3.6926	2.96828	2.49325	4.19779	3.29118	3.79727	3.50421	3.55337	1.38613	3.14285	3.1908	2.91438	2.99784	4.27209	1.95953	turquoise	0.667405	-0.831811	-0.871266	-0.307237	-0.413434	0.753634	0.2035	-0.410312	-0.262593	0.171761	0.00014304	7.58881e-08	3.36017e-09	0.119024	0.0320675	5.67474e-06	0.308638	0.0335212	0.185745	0.391635
D-dichotoma_M_contig10.44.1	OG0000608	4.79946	4.06365	4.46868	12.5718	12.6894	13.091	4.67601	5.8946	6.2021	6.08949	5.37406	6.01812	5.06386	5.38176	5.04688	6.58183	5.65404	6.31355	5.83067	6.15498	4.45805	5.96676	5.30669	5.5955	5.35983	7.21153	5.82491	turquoise	0.747194	-0.861516	-0.928053	-0.305823	-0.384636	0.655815	0.110951	-0.463622	-0.330554	-0.0408092	7.5395e-06	7.92075e-09	3.20007e-12	0.120819	0.0475892	0.000204217	0.581672	0.0148624	0.0921722	0.839838
D-dichotoma_M_contig10.55.1	OG0009274	3.55322	2.64168	4.72082	6.76137	6.40259	7.33398	3.35209	3.42606	4.44292	4.22163	0	3.16609	4.02412	1.63242	6.37371	4.10896	0	1.2645	4.34346	3.70957	2.21131	2.80069	2.26486	3.25828	0.76452	3.98843	5.59336	turquoise	0.657756	-0.49463	-0.621361	-0.0961433	-0.242887	0.245746	-0.036065	-0.285928	-0.326847	-0.261702	0.000192597	0.00872109	0.000541777	0.633331	0.222183	0.21662	0.85826	0.148231	0.0961028	0.187297
D-dichotoma_M_contig10.65.1	OG0009275	0	0	0	0	0	0	0	0	0	3.01127	0	0	0	2.44974	0	0.630339	0	0.356693	1.13347	1.22805	0.853502	0.457315	1.77486	0.927471	1.6306	1.19739	1.36514	NA	NA	NA	NA	NA	NA	NA	NA	NA	NA	NA	NA	NA	NA	NA	NA	NA	NA	NA	NA	NA
D-dichotoma_M_contig10.73.1	OG0009276	0	0	0	5.53161	0	0	0	0	0	0	0	0	0	0	0	0.449203	0	0	0	0	0	0	0	0	0	0	0	blue	0.448621	-0.479899	-0.527628	-0.134984	-0.213582	0.347094	0.0594436	0.0503499	-0.216783	-0.0700264	0.0189199	0.0113017	0.00467838	0.502035	0.284758	0.0760912	0.768358	0.803048	0.277427	0.728534
D-dichotoma_M_contig9.19739.1	OG0009277	5.27	4.45696	3.77451	0	0	0	5.35458	5.32171	5.40936	6.36144	6.35656	5.82865	6.35967	4.8755	4.40086	4.09361	5.85839	5.53727	3.73731	3.91613	4.48429	5.70318	4.18009	4.63815	4.2252	4.52262	5.43595	turquoise	-0.663863	0.817878	0.853271	0.344232	0.497134	-0.516911	-0.0109099	0.416599	0.290144	0.330764	0.000159742	1.89395e-07	1.55741e-08	0.0787086	0.00833605	0.00576565	0.956928	0.0306456	0.14208	0.0919526
D-dichotoma_M_contig9.19740.1	OG0009278	3.85035	4.76569	2.38634	0	0	0	5.81423	3.96558	5.40936	6.08949	6.16643	6.01812	5.91098	3.89866	4.17768	3.94755	5.59473	5.53727	3.60201	3.52561	4.51006	5.01483	4.06551	3.69496	3.66069	3.82252	5.15673	turquoise	-0.61872	0.763523	0.787735	0.336912	0.512233	-0.423841	-0.0155583	0.378951	0.268315	0.428055	0.000581137	3.60628e-06	1.07806e-06	0.0857128	0.00630325	0.0275825	0.938606	0.0512577	0.175992	0.0259176
D-dichotoma_M_contig9.19745.1	OG0009279	5.05383	4.76569	5.43573	0	0	0	4.83965	3.96558	5.0056	3.53532	3.47482	5.04021	3.71898	5.25855	4.68679	5.41422	4.73829	3.2349	5.01075	5.00457	4.45805	4.42721	5.03706	5.45425	4.64341	4.49531	4.13324	NA	NA	NA	NA	NA	NA	NA	NA	NA	NA	NA	NA	NA	NA	NA	NA	NA	NA	NA	NA	NA
D-dichotoma_M_contig1436.3190.1	OG0009280	0	0	0	0	0	0	0	0	0	0	0	0	0	0	0	0	0	0	0	0	0	0	0	0	0	0	0	NA	NA	NA	NA	NA	NA	NA	NA	NA	NA	NA	NA	NA	NA	NA	NA	NA	NA	NA	NA	NA
D-dichotoma_M_contig1436.3191.1	OG0009281	0	0	0	2.73491	0	0	3.73137	0	0	2.17994	0	0	0	0.608885	0	0	0	0.356693	0.261803	0	0	0	0	0	0.551757	0.517103	0	NA	NA	NA	NA	NA	NA	NA	NA	NA	NA	NA	NA	NA	NA	NA	NA	NA	NA	NA	NA	NA
D-dichotoma_M_contig1439.3207.1	OG0009282	0	0	0	0	0	0	0	0	0	0	0	0	1.75954	0	0	0.449203	0	0.356693	0	0	0	0	0	5.51242	2.66846	1.75315	0.838351	NA	NA	NA	NA	NA	NA	NA	NA	NA	NA	NA	NA	NA	NA	NA	NA	NA	NA	NA	NA	NA
D-dichotoma_M_contig1441.3229.1	OG0009283	0	0	0	0	0	0	0	0	0	0	0	0	0	0.608885	0	0	0	0.356693	0	0	0	0	0	0	0	0	0	NA	NA	NA	NA	NA	NA	NA	NA	NA	NA	NA	NA	NA	NA	NA	NA	NA	NA	NA	NA	NA
D-dichotoma_M_contig1441.3230.1	OG0009284	0	0	0	0	0	0	2.8361	0	0	2.17994	0	0	0	0	0	0	0	0	0	0	0	0	0	0	0	0	0	NA	NA	NA	NA	NA	NA	NA	NA	NA	NA	NA	NA	NA	NA	NA	NA	NA	NA	NA	NA	NA
D-dichotoma_M_contig1442.3242.1	OG0009285	0	3.52119	0	0	0	0	2.8361	0	2.62933	6.08949	4.40844	5.82865	5.25626	3.52376	3.6729	3.44131	4.14378	2.45623	1.76031	2.04702	3.36165	3.01555	4.24734	2.20406	4.64341	4.27209	3.19262	turquoise	-0.525936	0.358758	0.558972	-0.00398432	0.246927	0.0801804	0.481537	0.303079	0.438799	0.644162	0.00483743	0.0661108	0.00243882	0.984264	0.21435	0.690957	0.0109866	0.12436	0.0220385	0.00028785
D-dichotoma_M_contig556.16260.1	OG0009286	4.49042	4.76569	4.16295	2.73491	0	0	7.60316	6.11352	6.56031	7.07886	6.16643	7.00694	4.92346	3.87303	4.57265	3.94755	3.56284	3.96212	4.99283	4.57426	4.13267	3.51646	5.24879	4.19868	4.29534	4.11944	3.94923	blue	-0.330137	0.851674	0.62592	0.635922	0.45779	-0.546626	-0.142758	0.34246	-0.0540427	0.414758	0.0926081	1.76696e-08	0.000479315	0.000363857	0.0163447	0.00317578	0.477492	0.0803628	0.788913	0.0314662
D-dichotoma_M_contig556.16261.1	OG0000609	3.17858	0	4.16295	0	0	0	6.22285	4.66512	5.57551	6.08949	6.67497	4.63971	3.66573	3.14994	3.28194	3.68614	3.44836	3.64386	3.84111	3.58061	4.19755	3.25982	4.12394	3.79209	3.60655	4.02709	3.58881	turquoise	-0.423779	0.716762	0.653291	0.410519	0.438634	-0.357243	-0.0178668	0.308751	0.148719	0.516357	0.0276077	2.59942e-05	0.000220246	0.0334235	0.0220944	0.067347	0.929517	0.117122	0.459099	0.00582719
D-dichotoma_M_contig556.16268.1	OG0009287	7.10769	6.79509	7.33696	9.11739	8.38974	9.30592	7.382	7.50261	7.77394	8.23441	8.04476	8.24836	8.97577	9.07118	8.58192	8.59181	8.55978	9.21488	8.7495	9.0344	9.53158	9.39471	8.60059	9.05838	9.3001	8.64217	8.91822	brown	-0.238956	-0.640448	-0.0547565	-0.849987	-0.495072	0.755854	0.421555	0.256561	0.666438	0.157883	0.229991	0.000320185	0.786189	2.01581e-08	0.00865205	5.13505e-06	0.0285213	0.196427	0.000147439	0.431566
D-dichotoma_M_contig556.16272.1	OG0009288	5.27	5.99745	5.80653	10.1738	7.85112	10.25	6.16229	6.5486	7.90461	7.04068	8.15129	7.58816	1.13287	0.608885	0.776001	0.630339	0	0.880852	2.47935	0.922202	1.14426	1.69506	1.2534	3.74434	1.2616	4.11944	5.73528	green	0.912548	-0.126113	-0.701748	0.555604	0.249137	-0.0598237	-0.200971	-0.413931	-0.870942	0.146818	3.36886e-11	0.530787	4.52483e-05	0.00262356	0.210143	0.766918	0.314816	0.0318407	3.46113e-09	0.464924
D-dichotoma_M_contig556.16273.1	OG0009289	4.30692	2.64168	0	8.06009	6.40259	8.52687	5.81423	3.42606	5.57551	5.31632	6.16643	6.01812	0	0.336329	0	0.242014	0	0.356693	1.37396	0.533566	0	0.804027	0.75874	1.36647	0	2.2868	3.82104	turquoise	0.892197	-0.236217	-0.740033	0.441312	0.165105	0.132475	-0.122208	-0.413957	-0.77025	0.274248	4.11233e-10	0.235537	1.02415e-05	0.0212032	0.410517	0.510088	0.543686	0.0318289	2.61622e-06	0.166262
D-dichotoma_M_contig557.16283.1	OG0009290	7.87387	7.20688	8.12963	0	0	0	7.1207	7.24889	7.90461	6.48033	6.52453	5.04021	8.10652	7.16022	7.90154	7.64707	8.2388	7.78543	8.1332	8.0837	7.03241	7.44038	8.24018	7.72829	7.98054	7.66964	7.32589	turquoise	-0.821974	0.748297	0.973559	0.0908216	0.252736	-0.537739	-0.0324933	0.542923	0.525717	-0.0465619	1.45933e-07	7.1856e-06	1.50859e-17	0.652332	0.203415	0.00381735	0.872178	0.00343089	0.00485837	0.817611
D-dichotoma_M_contig558.16289.1	OG0009291	5.97151	5.23588	5.28743	0	0	0	4.83965	5.32171	4.44292	5.18244	3.47482	3.16609	5.69543	5.89594	5.40925	6.86558	7.94629	5.38096	5.09715	5.27016	3.91843	5.46813	6.87779	6.10109	6.11374	7.15374	6.20988	turquoise	-0.767722	0.585598	0.902124	-0.0719865	0.220296	-0.380625	0.220214	0.533791	0.627089	-0.068136	2.95518e-06	0.00133144	1.29932e-10	0.721229	0.269525	0.0501554	0.269707	0.00413587	0.000464339	0.735601
D-dichotoma_M_contig559.16308.1	OG0009292	0	0	0	6.32554	5.99322	6.42437	2.8361	0	0	0	0	0	0	0	0	0	0	0	0	0	0	0	0	2.62904	0	3.0202	3.92449	green	0.822749	-0.768465	-0.835272	-0.264441	-0.253236	0.531937	0.197106	-0.397813	-0.291762	-0.110439	1.38808e-07	2.8517e-06	5.96937e-08	0.182555	0.202491	0.00429312	0.324408	0.0398813	0.13977	0.583428
D-dichotoma_M_contig559.16311.1	OG0009293	0	0	3.77451	5.53161	4.45286	6.71082	4.98661	0	3.50777	4.47172	0	0	1.65412	3.192	3.20043	2.98922	2.62838	2.89748	3.50421	2.51065	3.24371	1.69506	4.02008	3.79209	3.43072	2.85811	4.443	blue	0.401373	-0.61341	-0.464759	-0.414564	-0.368952	0.526542	0.259229	-0.0550453	0.0851788	-0.0834093	0.0379794	0.000667848	0.0145867	0.0315539	0.0582449	0.00477996	0.191652	0.785087	0.672713	0.679152
D-dichotoma_M_contig5381.15969.1	OG0009294	0	0	0	0	0	0	3.73137	0	4.75152	3.53532	0	0	4.8418	2.64404	4.19181	3.48903	4.38072	3.98785	4.28576	4.56065	5.94289	4.42721	3.89144	3.59081	3.33406	4.04604	4.59185	turquoise	-0.640947	0.0692785	0.580014	-0.490479	-0.0489145	0.131342	0.180075	0.42555	0.782193	0.0410161	0.000315662	0.731327	0.00151808	0.00939251	0.808559	0.513746	0.368759	0.0268973	1.44023e-06	0.839037
D-dichotoma_M_contig5389.15972.1	OG0009295	6.25119	7.10071	7.33696	6.90449	5.99322	6.71082	8.68803	8.01867	9.05016	9.48757	10.0127	9.4407	8.32298	8.12563	7.33347	8.10884	7.73668	7.58716	7.94099	8.38924	9.00951	8.21323	8.30869	8.19144	7.97387	8.24611	8.55896	blue	-0.346103	0.505694	0.519036	0.264531	0.470749	-0.0922779	0.134223	0.349135	0.1892	0.735232	0.0769901	0.00712519	0.00553453	0.1824	0.0132034	0.64711	0.504472	0.0742669	0.344573	1.25083e-05
D-dichotoma_M_contig5389.15973.1	OG0000216	5.27	2.64168	4.46868	3.62227	0	0	5.73328	5.77127	6.30033	7.15233	6.35656	7.09375	5.63437	5.45266	5.2697	5.64763	5.92946	4.818	5.4522	5.6884	6.68183	5.89624	5.78529	5.40135	5.46248	5.79523	6.18925	turquoise	-0.617058	0.659553	0.793204	0.191539	0.414129	-0.299087	0.0986261	0.548051	0.395794	0.432919	0.000607157	0.000182358	8.03246e-07	0.338531	0.0317508	0.129647	0.624543	0.00308204	0.0409928	0.0240981
D-dichotoma_M_contig5399.15987.1	OG0009296	3.85035	2.64168	3.77451	0	0	4.31207	5.89089	2.5544	2.62933	6.08949	5.37406	0	5.11442	5.21842	4.35137	4.33467	3.94703	5.46581	5.30748	5.01459	3.95642	4.26875	4.97492	5.75459	5.35983	4.23953	3.68033	turquoise	-0.526083	0.29505	0.590355	-0.149738	-0.112984	-0.0534323	0.149503	0.540845	0.537868	0.13547	0.0048234	0.135157	0.00118845	0.455993	0.574728	0.791246	0.456708	0.00358158	0.0038073	0.500482
D-dichotoma_M_contig5413.16038.1	OG0000006	0	0	0	0	5.41954	0	0	0	0	0	0	0	0.308699	1.36471	0.439558	1.4026	1.48692	1.42381	1.48067	1.88167	0	1.08335	1.02717	1.08911	1.11415	1.44589	1.50522	NA	NA	NA	NA	NA	NA	NA	NA	NA	NA	NA	NA	NA	NA	NA	NA	NA	NA	NA	NA	NA
D-dichotoma_M_contig5413.16039.1	OG0000014	0	0	0	0	0	0	2.8361	0	0	0	0	0	1.13287	1.85814	0.918746	0.630339	0	0.356693	1.13347	1.59157	0.488969	1.08335	1.02717	1.48742	0.551757	0.281597	0.336476	NA	NA	NA	NA	NA	NA	NA	NA	NA	NA	NA	NA	NA	NA	NA	NA	NA	NA	NA	NA	NA
D-dichotoma_M_contig5427.16048.1	OG0009297	0	0	0	0	0	0	0	0	0	0	0	0	0	0	0	0	0	0.356693	0	0	0	0	0	0	0	0	0	NA	NA	NA	NA	NA	NA	NA	NA	NA	NA	NA	NA	NA	NA	NA	NA	NA	NA	NA	NA	NA
D-dichotoma_M_contig809.18934.1	OG0009298	9.46573	9.16043	8.75585	0	4.45286	0	8.97005	7.05099	7.29114	7.35264	7.15635	7.70306	7.54767	7.78109	6.91929	6.79378	6.5865	7.14776	6.93047	7.10785	8.16105	7.8291	6.98611	6.99687	6.95408	6.81293	7.804	blue	-0.638397	0.858805	0.824096	0.382908	0.45995	-0.70356	-0.218725	0.140037	0.209295	-0.00495362	0.000339366	9.9385e-09	1.27165e-07	0.0486817	0.015782	4.23966e-05	0.273039	0.486011	0.294763	0.980436
D-dichotoma_M_contig810.18958.1	OG0009299	3.17858	0	0	6.22001	7.20261	5.27529	2.02518	0	2.62933	2.17994	0	4.63971	0	1.50476	0.776001	1.49898	0.536773	0.356693	1.25872	0.533566	0	0.457315	0.428685	0.927471	1.6306	1.32698	1.36514	turquoise	0.766491	-0.597786	-0.84852	-0.0060752	-0.231101	0.453946	0.0753453	-0.575536	-0.486311	0.0526913	3.13423e-06	0.000991642	2.25755e-08	0.976008	0.246131	0.0173867	0.708768	0.00168369	0.0101096	0.794079
D-dichotoma_M_contig811.18968.1	OG0009300	4.30692	5.23588	5.28743	2.73491	0	0	5.89089	0	4.04982	4.87041	3.47482	4.0834	1.65412	2.44974	1.56513	1.18808	1.23399	2.52814	2.25718	2.26417	2.54629	2.3513	1.02717	2.62904	1.92418	1.84257	1.20998	brown	0.00759828	0.640695	0.240891	0.704066	0.458344	-0.573437	-0.402194	0.0997797	-0.3827	0.107754	0.969995	0.000317935	0.226126	4.16289e-05	0.0161987	0.0017665	0.0375512	0.620476	0.0488147	0.592669
D-dichotoma_M_contig812.18971.1	OG0009301	0	0	0	0	0	0	2.02518	0	0	2.17994	0	0	0	0	0	0	0	0	0	0	0	0	0	0	0	0	0	NA	NA	NA	NA	NA	NA	NA	NA	NA	NA	NA	NA	NA	NA	NA	NA	NA	NA	NA	NA	NA
D-dichotoma_M_contig812.18972.1	OG0009302	3.17858	0	0	0	0	0	2.8361	0	0	5.43883	0	0	0.308699	0	0	0	0	0	0.261803	0	0	0	0	0.293353	1.2616	0.719506	0	NA	NA	NA	NA	NA	NA	NA	NA	NA	NA	NA	NA	NA	NA	NA	NA	NA	NA	NA	NA	NA
D-dichotoma_M_contig813.18975.1	OG0009303	2.67116	0	2.38634	0	0	0	5.11997	0	2.62933	2.17994	0	0	1.54039	3.87303	1.94467	3.55777	3.76768	2.78455	1.37396	1.08322	1.38613	2.63733	1.97858	3.18863	3.46155	2.81457	1.85865	NA	NA	NA	NA	NA	NA	NA	NA	NA	NA	NA	NA	NA	NA	NA	NA	NA	NA	NA	NA	NA
D-dichotoma_M_contig813.18977.1	OG0009304	5.05383	3.52119	4.46868	0	0	0	5.35458	4.35734	5.40936	4.68479	3.47482	4.0834	0	0	0.236455	0	0	0	0.483315	0.29131	0	0.457315	0.230207	0	0	0	0	NA	NA	NA	NA	NA	NA	NA	NA	NA	NA	NA	NA	NA	NA	NA	NA	NA	NA	NA	NA	NA
D-dichotoma_M_contig813.18978.1	OG0009305	5.27	4.45696	4.72082	0	0	0	5.81423	2.5544	0	2.17994	3.47482	3.16609	0	0	0.439558	0.242014	0	0.642448	0.996303	0	0	1.31727	0.428685	0	0.551757	0.281597	0	brown	0.146452	0.650674	0.116605	0.830525	0.480243	-0.704786	-0.491489	-0.085262	-0.592991	-0.027779	0.466048	0.000238022	0.562448	8.28545e-08	0.0112348	4.05586e-05	0.00922536	0.67241	0.00111508	0.890604
D-dichotoma_M_contig1833.5433.1	OG0009306	0	0	2.38634	0	0	0	0	0	0	2.17994	0	0	5.0843	5.05712	3.35909	3.82276	4.02898	4.66689	4.3149	3.95827	2.44304	3.36801	4.16626	4.51551	4.29534	3.98843	3.58881	NA	NA	NA	NA	NA	NA	NA	NA	NA	NA	NA	NA	NA	NA	NA	NA	NA	NA	NA	NA	NA
D-dichotoma_M_contig1833.5434.1	OG0009307	0	0	0	0	0	0	0	0	0	0	0	3.16609	3.91426	4.11082	2.24488	3.53522	2.62838	3.67587	3.80048	3.28189	1.14426	2.72132	3.37047	3.66962	3.43072	3.60976	2.76101	NA	NA	NA	NA	NA	NA	NA	NA	NA	NA	NA	NA	NA	NA	NA	NA	NA	NA	NA	NA	NA
D-dichotoma_M_contig1834.5437.1	OG0009308	0	0	0	0	0	0	0	0	0	0	0	0	0	0	0	0	0	0.356693	0	0.29131	0	0	0	0	0	0	0	NA	NA	NA	NA	NA	NA	NA	NA	NA	NA	NA	NA	NA	NA	NA	NA	NA	NA	NA	NA	NA
D-dichotoma_M_contig1834.5438.1	OG0009309	0	0	0	2.73491	0	3.38293	2.02518	0	0	0	0	0	0	1.74969	1.8046	0.630339	0.293208	0.880852	0.996303	1.35967	1.14426	1.31727	3.67403	3.11545	3.66069	3.3295	3.27323	NA	NA	NA	NA	NA	NA	NA	NA	NA	NA	NA	NA	NA	NA	NA	NA	NA	NA	NA	NA	NA
D-dichotoma_M_contig1837.5447.1	OG0009310	7.1355	5.58992	6.55494	8.52637	9.38759	7.41595	7.50902	6.38995	7.77394	7.55583	7.34773	7.52709	6.88153	7.83351	7.3943	7.32595	6.55573	7.34981	7.2891	7.29626	7.04569	6.87034	7.43434	7.55749	7.64333	7.14058	6.629	turquoise	0.396989	-0.555847	-0.577609	-0.233458	-0.476139	0.628938	0.240879	-0.53226	-0.089144	0.252208	0.0403319	0.00260987	0.00160519	0.241212	0.0120534	0.00044151	0.226148	0.00426542	0.658367	0.204392
D-dichotoma_M_contig1838.5451.1	OG0000075	6.03195	4.06365	6.18747	2.73491	0	0	6.95207	5.48762	6.71078	5.65647	5.37406	5.61048	7.49903	9.50149	7.35246	8.3165	7.61591	8.61368	8.57833	8.64609	7.48964	7.74631	8.1932	9.28021	8.73428	8.11429	7.33531	turquoise	-0.847951	0.456696	0.899375	-0.245217	0.00282143	-0.159008	0.193907	0.633643	0.784299	0.0610198	2.35829e-08	0.0166358	1.80894e-10	0.217642	0.988856	0.428248	0.332477	0.000387766	1.29142e-06	0.762388
D-dichotoma_M_contig1839.5453.1	OG0009311	6.39619	5.58992	6.26884	4.87213	5.99322	6.5747	6.09907	6.758	6.6375	5.65647	6.52453	5.61048	6.27331	6.29851	6.68717	7.78845	7.9089	7.28122	6.83815	7.19635	7.28094	7.17219	6.47388	6.51443	6.37896	7.16462	7.1741	turquoise	-0.571678	0.0441936	0.483082	-0.441951	0.133541	0.0270949	0.0152486	0.316181	0.605663	-0.121921	0.00183862	0.826746	0.0106961	0.0209952	0.506658	0.893283	0.939826	0.108118	0.000814534	0.544642
D-dichotoma_M_contig1839.5454.1	OG0009312	4.49042	5.42373	6.34585	0	0	3.38293	4.83965	5.48762	5.85951	4.87041	5.37406	5.35334	5.72176	5.74168	6.29081	7.11975	7.31881	6.56503	6.29281	6.89652	7.02349	6.87034	6.09743	5.77256	5.87696	6.90921	6.87159	turquoise	-0.808587	0.56213	0.905326	-0.0910725	0.325482	-0.342856	0.0241823	0.646373	0.610275	0.0411475	3.34295e-07	0.00227582	8.72618e-11	0.651431	0.0975817	0.07999	0.9047	0.000269991	0.000724181	0.838527
D-dichotoma_M_contig2476.8501.1	OG0009313	0	0	0	0	0	0	0	0	0	0	0	0	0.308699	1.74969	0.439558	0.935998	0	1.2645	1.25872	1.08322	1.14426	0.457315	1.02717	1.88979	1.39536	0.517103	0.838351	NA	NA	NA	NA	NA	NA	NA	NA	NA	NA	NA	NA	NA	NA	NA	NA	NA	NA	NA	NA	NA
D-dichotoma_M_contig2480.8522.1	OG0009314	5.16596	5.58992	5.12211	0	0	0	2.8361	3.96558	0	3.01127	3.47482	3.16609	2.80007	2.91906	4.13445	3.55777	3.69423	3.43524	4.01098	3.91613	4.92843	3.60757	3.41794	2.91438	3.43072	2.81457	3.42206	turquoise	-0.629636	0.648809	0.730524	0.189388	0.29178	-0.566799	-0.216886	0.379348	0.263612	-0.122781	0.000433144	0.000251455	1.51557e-05	0.344085	0.139743	0.00205202	0.277194	0.0509945	0.183982	0.541784
D-dichotoma_M_contig70.17904.1	OG0009315	6.19942	5.42373	6.26884	0	0	0	4.03141	6.82155	4.75152	2.17994	0	0	6.70803	5.2782	6.61299	5.2646	5.88064	6.18596	6.08017	5.81993	4.40409	4.2964	6.63071	6.23668	6.15205	4.94225	5.16731	turquoise	-0.691884	0.414837	0.740402	-0.186578	-0.112201	-0.442755	-0.0281722	0.468137	0.558799	-0.505817	6.39795e-05	0.0314308	1.00838e-05	0.351423	0.577398	0.0207355	0.889065	0.0137927	0.00244801	0.00710895
D-dichotoma_M_contig71.17991.1	OG0009316	0	0	0	0	0	0	0	0	0	0	0	0	0	0	0	0	0	0	0	0	0	0	0	0	0	0	0	NA	NA	NA	NA	NA	NA	NA	NA	NA	NA	NA	NA	NA	NA	NA	NA	NA	NA	NA	NA	NA
D-dichotoma_M_contig71.17993.1	OG0009317	0	0	0	10.3404	9.19525	10.4383	0	0	0	2.17994	0	0	0	0.608885	0.617565	0.791248	0.536773	0	0.483315	0.533566	0	0	0	2.73056	0.551757	3.13084	4.11149	green	0.809877	-0.859122	-0.909895	-0.318246	-0.351336	0.630421	0.224052	-0.409966	-0.301868	-0.0692066	3.09506e-07	9.68096e-09	4.823e-11	0.105708	0.0723362	0.000423904	0.261235	0.0336856	0.125947	0.731596
D-dichotoma_M_contig71.17994.1	OG0009318	0	0	3.24132	0	0	0	2.02518	3.42606	0	0	4.40844	0	4.9571	6.49607	5.78505	6.70059	6.00228	5.88413	5.43239	5.61125	3.52224	4.61459	5.4101	6.50371	6.02363	5.85017	5.28861	yellow	-0.719112	0.0230026	0.62542	-0.606962	-0.254336	0.222887	0.425877	0.480738	0.882399	0.0267929	2.37584e-05	0.90933	0.000485835	0.000788136	0.200472	0.263788	0.0267674	0.0111392	1.1548e-09	0.894466
D-dichotoma_M_contig71.17995.1	OG0009319	0	0	2.38634	0	0	0	0	0	0	0	0	0	2.19499	3.55633	3.96382	4.99397	4.55681	3.50818	3.13094	3.3147	2.44304	2.54814	2.26486	4.08826	2.86577	4.2559	3.19262	NA	NA	NA	NA	NA	NA	NA	NA	NA	NA	NA	NA	NA	NA	NA	NA	NA	NA	NA	NA	NA
D-dichotoma_M_contig71.17997.1	OG0009320	3.55322	0	2.38634	2.73491	5.41954	0	3.73137	0	2.62933	2.17994	0	0	0.966698	2.96828	2.99017	3.68614	4.04876	2.59664	2.37253	2.56621	1.38613	2.3513	2.85362	3.41898	3.23046	2.72335	2.05381	NA	NA	NA	NA	NA	NA	NA	NA	NA	NA	NA	NA	NA	NA	NA	NA	NA	NA	NA	NA	NA
D-dichotoma_M_contig1140.1176.1	OG0009321	7.84047	8.39402	7.94393	5.53161	6.40259	3.38293	8.81148	7.54087	7.63024	7.95533	7.34773	7.58816	5.09441	5.96427	4.97518	4.57473	5.17618	5.56317	5.13031	4.37087	5.26754	5.20189	5.45061	5.60889	5.45483	4.98215	4.66836	brown	0.180431	0.690362	0.0729702	0.915913	0.511032	-0.712131	-0.424118	-0.303332	-0.66242	0.0837192	0.367798	6.74112e-05	0.717572	2.10142e-11	0.00644793	3.0954e-05	0.0274707	0.12403	0.000167023	0.678022
D-dichotoma_M_contig1140.1181.1	OG0000002	0	0	0	0	0	0	0	0	0	0	0	0	0.562846	2.37869	0.236455	0.630339	1.59849	0.356693	0.844711	0.533566	0	0	1.02717	1.08911	0.76452	0.896975	0.336476	NA	NA	NA	NA	NA	NA	NA	NA	NA	NA	NA	NA	NA	NA	NA	NA	NA	NA	NA	NA	NA
D-dichotoma_M_contig4524.14350.1	OG0009322	1.88155	0	3.24132	3.62227	0	0	2.02518	0	4.44292	0	0	0	0.308699	2.58214	2.81869	2.98922	4.48603	1.42381	1.92055	2.12309	1.14426	1.51849	3.21787	2.62904	4.4723	2.00632	2.22569	NA	NA	NA	NA	NA	NA	NA	NA	NA	NA	NA	NA	NA	NA	NA	NA	NA	NA	NA	NA	NA
D-dichotoma_M_contig4532.14368.1	OG0009323	1.88155	2.64168	4.46868	4.16764	5.41954	0	4.27966	4.35734	3.50777	4.47172	4.97057	4.63971	4.18416	5.56093	4.14901	5.27825	5.89163	4.40566	4.89973	4.62747	2.07981	3.0806	5.96784	5.46165	5.11031	5.92373	4.1758	grey	-0.315635	0.0977937	0.314803	-0.192946	-0.13997	0.24405	0.512076	-0.0798973	0.435174	0.336628	0.108761	0.627483	0.109747	0.334927	0.486223	0.219909	0.00632203	0.691996	0.0232902	0.0859936
D-dichotoma_M_contig4542.14395.1	OG0009324	0	0	0	0	0	0	2.02518	0	0	0	0	0	0	0	0	0	0	0	0	0	0	0.457315	0	0	0	0	0	NA	NA	NA	NA	NA	NA	NA	NA	NA	NA	NA	NA	NA	NA	NA	NA	NA	NA	NA	NA	NA
D-dichotoma_M_contig4543.14396.1	OG0009325	4.6532	7.71852	2.38634	0	0	0	4.67601	4.35734	3.50777	5.84553	3.47482	0	4.12621	5.31672	4.02823	4.77086	4.33312	3.79727	4.62516	4.35518	2.44304	2.80069	5.05218	4.33387	3.99167	5.04943	3.34956	turquoise	-0.527437	0.606156	0.700937	0.153209	0.171705	-0.452552	0.0331303	0.381754	0.339308	-0.0705666	0.00469611	0.000804425	4.65804e-05	0.445495	0.39179	0.0177777	0.869693	0.049422	0.0833696	0.726518
D-dichotoma_M_contig1199.1602.1	OG0000014	0	0	0	0	0	0	0	0	0	0	0	0	3.66573	4.19595	3.35909	3.91298	1.48692	3.19127	3.89998	3.24832	3.57203	2.45307	4.66638	4.48678	4.42615	4.23953	4.90176	NA	NA	NA	NA	NA	NA	NA	NA	NA	NA	NA	NA	NA	NA	NA	NA	NA	NA	NA	NA	NA
D-dichotoma_M_contig1203.1648.1	OG0009326	4.09662	0	3.77451	4.56247	5.41954	5.58975	4.03141	2.5544	4.04982	3.9189	6.52453	6.01812	5.91669	6.75994	6.01698	8.07797	7.70431	6.89585	6.18252	6.68065	7.45357	7.63431	5.70622	6.3447	6.0942	7.3167	7.26066	yellow	-0.421446	-0.348725	0.216283	-0.707864	-0.167141	0.610047	0.440706	0.233002	0.731575	0.303572	0.0285669	0.0746306	0.278564	3.62516e-05	0.404688	0.000728425	0.0214023	0.242158	1.45247e-05	0.123718
D-dichotoma_M_contig1204.1654.1	OG0009327	0	0	0	0	0	0	0	0	0	0	0	0	0.966698	0	0	0	0.293208	0	0.261803	0	0	0	0	1.23445	0.76452	0	0	NA	NA	NA	NA	NA	NA	NA	NA	NA	NA	NA	NA	NA	NA	NA	NA	NA	NA	NA	NA	NA
D-dichotoma_M_contig1204.1655.1	OG0009328	0	0	0	0	0	0	0	0	0	0	0	0	0	0	0	0	0	0	0	0	0	0.804027	0.230207	0	0.302097	0	0	NA	NA	NA	NA	NA	NA	NA	NA	NA	NA	NA	NA	NA	NA	NA	NA	NA	NA	NA	NA	NA
D-dichotoma_M_contig1204.1656.1	OG0009329	4.79946	2.64168	3.77451	2.73491	0	0	3.73137	3.96558	0	4.22163	4.40844	4.0834	3.55294	6.22446	4.93375	4.65012	4.94241	5.67035	5.54119	5.16612	3.7556	5.38043	3.55166	4.93256	4.57456	3.09489	3.19262	turquoise	-0.723339	0.380706	0.695158	-0.139665	-0.0811308	-0.081644	0.0742039	0.532581	0.58183	0.15984	2.01658e-05	0.0501022	5.71156e-05	0.487183	0.687475	0.685597	0.712994	0.00423796	0.00145506	0.425803
D-dichotoma_M_contig932.20062.1	OG0009330	2.67116	2.64168	0	0	0	0	2.8361	0	2.62933	0	0	0	0	0	0	2.21812	1.88922	0	0	0	3.11526	0	0	0	0	1.55574	3.06259	NA	NA	NA	NA	NA	NA	NA	NA	NA	NA	NA	NA	NA	NA	NA	NA	NA	NA	NA	NA	NA
D-dichotoma_M_contig932.20069.1	OG0009331	4.6532	0	4.46868	0	0	0	2.8361	3.42606	2.62933	2.17994	0	0	6.70803	6.23456	7.20701	6.04485	6.18766	7.08059	6.87775	7.03095	5.69582	6.26145	6.50719	6.36457	7.22284	6.53971	5.50433	turquoise	-0.786787	0.107984	0.699088	-0.571831	-0.290626	0.0193876	0.219854	0.516065	0.882094	-0.24402	1.13349e-06	0.591873	4.97455e-05	0.00183222	0.141388	0.923534	0.270511	0.00585989	1.19082e-09	0.219967
D-dichotoma_M_contig933.20073.1	OG0009332	0	0	0	0	0	0	0	0	0	0	0	0	0.778857	0	0	0	0	0	0	0	0	0	0.230207	0	0	0	0	NA	NA	NA	NA	NA	NA	NA	NA	NA	NA	NA	NA	NA	NA	NA	NA	NA	NA	NA	NA	NA
D-dichotoma_M_contig933.20074.1	OG0009333	0	0	0	0	0	0	0	0	0	0	0	0	0	0	0	0	0	0	0	0	0	0	0	0	0	0	0	NA	NA	NA	NA	NA	NA	NA	NA	NA	NA	NA	NA	NA	NA	NA	NA	NA	NA	NA	NA	NA
D-dichotoma_M_contig935.20086.1	OG0009334	8.54757	7.95016	8.86454	0	0	0	8.20829	8.85815	9.72545	8.48247	9.42841	8.78033	8.56396	3.192	10.2751	6.99516	1.08869	7.20921	10.1479	10.0225	3.52224	5.12687	1.14471	1.23445	1.11415	0.896975	0	blue	-0.289171	0.691092	0.41073	0.588061	0.229002	-0.551505	-0.562576	0.128366	-0.226113	0.100853	0.143483	6.5744e-05	0.0333239	0.00125564	0.250568	0.00286451	0.00225355	0.523411	0.256757	0.616703
D-dichotoma_M_contig935.20088.1	OG0009335	6.89636	5.23588	6.55494	0	0	0	6.39063	6.11352	6.78051	5.84553	4.40844	5.61048	3.29688	0.336329	5.48004	4.55244	0	3.64386	6.13021	5.51571	2.97425	4.56998	0	0	0	0	0	blue	-0.162308	0.701401	0.321163	0.688312	0.38196	-0.672408	-0.708401	0.05618	-0.374259	-0.0188654	0.418598	4.58144e-05	0.102375	7.22909e-05	0.0492893	0.000122082	3.55432e-05	0.780762	0.0544495	0.925588
D-dichotoma_M_contig937.20100.1	OG0009336	0	2.64168	0	0	0	0	3.73137	3.96558	0	0	3.47482	0	3.3983	3.94857	4.41297	4.41097	4.6374	4.01313	4.43919	4.38639	2.73296	2.94743	4.39701	4.10726	4.07378	4.74764	4.06696	NA	NA	NA	NA	NA	NA	NA	NA	NA	NA	NA	NA	NA	NA	NA	NA	NA	NA	NA	NA	NA
D-dichotoma_M_contig3611.12171.1	OG0000217	5.05383	4.45696	4.93537	0	0	0	4.27966	4.66512	3.50777	3.53532	0	0	8.05827	7.45822	5.50289	5.56098	5.93479	9.87404	2.06475	2.56621	6.84767	8.75794	6.54242	6.13389	6.30013	7.40007	7.4018	turquoise	-0.709438	0.236664	0.674291	-0.360548	0.0302211	-0.238092	0.148623	0.443574	0.682584	-0.319093	3.42093e-05	0.234626	0.000114926	0.0646734	0.881051	0.231731	0.45939	0.0204736	8.7626e-05	0.104732
D-dichotoma_M_contig3615.12180.1	OG0009337	9.40418	9.36919	8.98981	2.73491	0	0	10.1704	8.64634	9.06421	9.33026	8.89647	8.08846	8.68431	9.29027	8.62421	8.81299	8.94929	8.66143	8.60733	8.34327	9.84618	9.28599	8.90182	9.00303	8.84073	9.17115	9.27943	turquoise	-0.740635	0.83647	0.952034	0.256498	0.448545	-0.593731	-0.0579816	0.558894	0.403274	0.10437	9.98505e-06	5.48628e-08	2.29661e-14	0.196541	0.0189426	0.00109519	0.773908	0.00244296	0.0369938	0.604404
D-dichotoma_M_contig3621.12195.1	OG0009338	7.41055	7.30576	6.67919	0	0	3.38293	7.58019	6.47145	7.29114	8.01563	7.59426	7.00694	5.03265	6.55768	4.77389	5.47473	5.25492	6.10597	7.61175	7.46471	5.74005	6.18955	5.94776	6.17949	6.1378	5.5385	5.62442	blue	-0.516083	0.880722	0.78877	0.500503	0.443128	-0.633128	-0.26198	0.466735	0.112764	0.217311	0.00585788	1.36562e-09	1.02033e-06	0.00784038	0.020616	0.000393354	0.186811	0.0141176	0.575475	0.276231
D-dichotoma_M_contig3624.12199.1	OG0009339	6.30116	7.15477	6.26884	0	0	0	8.16264	6.30356	5.40936	7.18771	5.68902	6.70997	0	0	0	0	0	0	0	0	1.93512	1.51849	0	0.293353	0	0	0.336476	brown	0.210233	0.730743	0.092744	0.979693	0.665916	-0.757974	-0.508251	-0.135156	-0.716752	0.141237	0.292556	1.50224e-05	0.645443	5.75282e-19	0.000149862	4.66312e-06	0.00679368	0.501484	2.60037e-05	0.482245
D-dichotoma_M_contig541.16021.1	OG0009340	6.86347	6.86162	6.6184	6.22001	0	6.83521	5.73328	6.5486	6.56031	4.87041	6.16643	6.18557	5.05353	3.92383	5.43324	6.51425	6.53835	5.23817	5.40555	5.21039	4.43132	5.57359	5.76707	4.51551	4.77197	5.93902	5.88386	red	-0.0322275	0.400916	0.273338	0.363669	0.426568	-0.439086	-0.187621	0.688952	-0.176969	-0.0875623	0.873215	0.0382194	0.16773	0.0622245	0.0264956	0.0219417	0.348688	7.07336e-05	0.377213	0.664075
D-dichotoma_M_contig543.16055.1	OG0009341	0	0	0	0	0	0	0	0	0	0	0	0	0	0	0	0	0	0	0	0	0	0	0	0	0	0	0	NA	NA	NA	NA	NA	NA	NA	NA	NA	NA	NA	NA	NA	NA	NA	NA	NA	NA	NA	NA	NA
D-dichotoma_M_contig543.16056.1	OG0009342	0	0	0	0	0	0	0	0	0	0	0	0	0	0	0	0	0	0	0	0	0	0	0	0	0.302097	0	0	NA	NA	NA	NA	NA	NA	NA	NA	NA	NA	NA	NA	NA	NA	NA	NA	NA	NA	NA	NA	NA
D-dichotoma_M_contig543.16059.1	OG0009343	7.7534	7.82238	7.41051	13.192	14.4299	13.1788	9.30722	8.22076	9.23539	9.81618	10.34	10.095	7.29497	7.42994	7.97793	7.90077	7.55151	6.87187	7.27805	7.26302	7.38906	7.30402	7.43722	7.44437	7.09839	7.44716	6.62516	turquoise	0.835319	-0.559976	-0.932281	0.140733	-0.13743	0.429549	-0.0169804	-0.633098	-0.663745	0.194653	5.94969e-08	0.00238592	1.53631e-12	0.483825	0.494245	0.0253471	0.933006	0.000393683	0.000160325	0.330587
D-dichotoma_M_contig543.16065.1	OG0009344	4.6532	6.21661	5.12211	4.16764	0	3.38293	5.89089	6.00821	5.0056	5.93152	6.16643	6.33559	4.45917	4.21647	5.34117	5.20155	5.56069	4.69841	5.43902	5.02454	4.06473	4.67903	5.32548	4.856	4.5886	4.53609	4.51106	turquoise	-0.362765	0.747395	0.632022	0.498745	0.438093	-0.489836	-0.100077	0.659953	0.0152867	0.299903	0.0629264	7.47397e-06	0.000405595	0.00809576	0.0222778	0.00950023	0.619431	0.000180148	0.939675	0.128553
D-dichotoma_M_contig717.18064.1	OG0009345	0	0	0	2.73491	5.41954	0	3.73137	0	0	2.17994	0	0	4.23988	6.02369	4.28702	3.94755	2.51919	4.75944	4.7584	4.18815	2.89822	2.72132	5.16778	5.27262	4.74716	3.3295	2.64463	yellow	-0.376006	-0.372075	0.148312	-0.72379	-0.642739	0.560419	0.452365	-0.0126616	0.743071	0.00338099	0.0532434	0.0559874	0.460343	1.98126e-05	0.000299883	0.00236295	0.0178308	0.950021	9.00424e-06	0.986647
D-dichotoma_M_contig717.18069.1	OG0009346	0	0	0	0	0	0	0	0	0	0	0	0	4.08624	4.35247	4.5288	4.13918	3.74361	3.96212	5.10551	5.68213	2.33182	1.99417	1.35447	2.77876	2.55867	2.94143	2.45032	yellow	-0.684676	-0.130844	0.497269	-0.707218	-0.432618	0.352079	0.266569	0.42299	0.878475	-0.058091	8.17216e-05	0.515355	0.00831568	3.71192e-05	0.0242074	0.0716938	0.178929	0.027929	1.7027e-09	0.773492
D-dichotoma_M_contig719.18085.1	OG0000610	6.30116	5.73892	6.67919	2.73491	4.45286	0	6.76108	7.81516	8.33369	8.78927	10.2942	9.31987	9.03142	8.15649	9.04044	9.86238	9.84906	8.62089	8.69236	9.19778	8.88946	8.60327	9.26725	8.56486	8.01342	9.34475	9.27699	turquoise	-0.782105	0.574642	0.854718	-0.0287534	0.282329	-0.163395	0.214614	0.325701	0.599132	0.413148	1.44678e-06	0.00171853	1.38728e-08	0.886791	0.153631	0.415447	0.282381	0.0973436	0.000959215	0.0321987
D-dichotoma_M_contig719.18086.1	OG0009347	8.67622	8.83583	8.86454	0	4.45286	3.38293	8.58798	8.17283	9.13247	9.8552	9.76677	9.93967	9.18361	9.41923	8.67286	9.66229	9.34589	9.04066	9.04137	9.24536	9.7868	9.55495	9.41606	9.30048	9.25681	9.66355	9.60309	turquoise	-0.774492	0.761127	0.923581	0.166819	0.409874	-0.444962	0.043121	0.337117	0.464001	0.254339	2.1251e-06	4.0329e-06	6.63488e-12	0.405605	0.0337296	0.0200363	0.83089	0.0855104	0.0147699	0.200467
D-dichotoma_M_contig719.18088.1	OG0000611	9.88572	10.0205	9.6133	0	0	3.38293	9.04743	8.93199	9.19765	8.81212	8.04476	8.80626	7.50851	7.11448	7.85791	7.01974	7.32693	6.79013	6.99491	6.78678	6.59418	7.04756	7.72953	7.04939	7.18408	7.2671	7.18455	blue	-0.512293	0.945115	0.805746	0.566861	0.529178	-0.789362	-0.202953	0.440045	0.0413773	0.0556295	0.00629616	1.1918e-13	3.95316e-07	0.00204915	0.00453659	9.88597e-07	0.309967	0.0216211	0.837637	0.782859
D-dichotoma_M_contig720.18107.1	OG0009348	10.1709	9.52097	10.0814	0	0	0	9.74424	8.94632	9.28422	8.4391	7.43467	7.80948	3.29688	0.336329	6.00102	3.78503	0	5.51973	8.16054	7.47925	4.28971	5.95813	0	0	0	0	0	blue	-0.0865208	0.74036	0.283953	0.782862	0.436578	-0.744622	-0.764092	0.0160157	-0.475301	-0.0255078	0.667844	1.01015e-05	0.151177	1.39138e-06	0.0227989	8.42576e-06	3.51114e-06	0.936804	0.0122266	0.899502
D-dichotoma_M_contig2091.6798.1	OG0009349	5.77332	4.45696	5.6932	0	0	4.31207	5.24204	5.8946	4.04982	5.55175	4.97057	6.70997	2.58746	1.63242	1.72911	1.9029	0.536773	1.2645	2.37253	2.90473	3.41719	2.72132	2.74612	2.33877	1.6306	2.67547	1.85865	brown	0.128282	0.678932	0.177902	0.841178	0.553613	-0.666051	-0.426672	0.0871411	-0.566623	0.183084	0.523687	9.88476e-05	0.374663	3.91197e-08	0.00273838	0.000149234	0.0264548	0.665599	0.00206009	0.360678
D-dichotoma_M_contig2092.6806.1	OG0009350	0	0	0	0	0	0	0	0	0	0	0	0	0.562846	0	0.236455	0	0.927098	0.356693	0.844711	0	0.488969	0.804027	0.230207	0	0.302097	0.719506	1.0361	NA	NA	NA	NA	NA	NA	NA	NA	NA	NA	NA	NA	NA	NA	NA	NA	NA	NA	NA	NA	NA
D-dichotoma_M_contig2097.6816.1	OG0000612	6.44146	5.23588	5.80653	3.62227	0	0	6.80136	6.21167	6.09669	5.7541	5.37406	5.35334	6.88153	7.83351	7.39887	7.83189	7.70431	7.20921	7.24247	7.1607	5.7181	6.54113	7.29666	7.85734	7.39044	7.55361	6.60584	turquoise	-0.802251	0.576074	0.918477	-0.0882531	0.11089	-0.29083	0.181781	0.660187	0.669297	0.0435837	4.84068e-07	0.00166302	1.44746e-11	0.66158	0.581882	0.141097	0.364165	0.000178863	0.00013477	0.829102
D-dichotoma_M_contig1467.3383.1	OG0009351	0	0	0	0	0	0	0	0	0	0	0	0	0	0	0	0	0	0	0	0	0	0	0	0.293353	0	0	0	NA	NA	NA	NA	NA	NA	NA	NA	NA	NA	NA	NA	NA	NA	NA	NA	NA	NA	NA	NA	NA
D-dichotoma_M_contig1467.3385.1	OG0009352	0	0	0	0	0	0	2.02518	0	0	0	0	0	0.562846	0	0.617565	0.449203	0.293208	0	0.483315	0.533566	1.38613	0	0	0.745413	0.551757	0.517103	0.609128	NA	NA	NA	NA	NA	NA	NA	NA	NA	NA	NA	NA	NA	NA	NA	NA	NA	NA	NA	NA	NA
D-dichotoma_M_contig1471.3407.1	OG0009353	5.90842	5.01986	6.10125	0	5.41954	0	6.39063	5.48762	5.72449	6.91965	5.68902	6.18557	6.34281	6.56969	6.00503	5.82078	5.39286	5.98341	5.84072	6.11827	5.09095	4.99809	6.23301	6.38028	6.49528	5.80082	5.53735	turquoise	-0.655604	0.694118	0.770198	0.195415	0.177744	-0.385241	0.0811804	-0.00892835	0.378623	0.210658	0.000205512	5.92219e-05	2.62291e-06	0.328658	0.375094	0.0472117	0.687293	0.964746	0.0514757	0.291558
D-dichotoma_M_contig518.15628.1	OG0000613	5.05383	2.64168	4.16295	9.84151	11.662	10.3155	7.08851	6.30356	7.19227	4.68479	6.67497	4.63971	3.98118	3.92383	2.95747	3.87757	4.79795	5.11514	4.09736	4.95339	5.36961	7.03941	4.60617	3.66962	3.36701	4.00789	4.69786	turquoise	0.728121	-0.597835	-0.862889	0.00135084	-0.105843	0.350097	-0.229064	-0.576695	-0.544462	-0.0309165	1.66913e-05	0.000990455	7.04791e-09	0.994665	0.599283	0.0734186	0.250436	0.0016394	0.00332286	0.878334
D-dichotoma_M_contig519.15639.1	OG0009354	0	0	0	0	0	0	0	0	0	0	0	0	0	0	0	0	0	0	0	0	0	0	0	0	0	0	0	NA	NA	NA	NA	NA	NA	NA	NA	NA	NA	NA	NA	NA	NA	NA	NA	NA	NA	NA	NA	NA
D-dichotoma_M_contig521.15696.1	OG0009355	9.13469	8.69699	7.96849	6.83471	0	6.42437	7.53314	8.87322	7.66753	7.38348	6.67497	6.59564	5.90525	4.95092	6.16038	5.08994	4.16206	4.66689	5.58968	5.42845	2.64264	3.81295	5.38044	5.26418	4.70912	4.18928	4.29642	brown	0.172551	0.572489	0.134197	0.733115	0.268966	-0.633465	-0.336005	0.364621	-0.520509	-0.0829342	0.389428	0.00180506	0.504553	1.36428e-05	0.174905	0.000389689	0.0866128	0.0614922	0.00537896	0.680884
D-dichotoma_M_contig564.16396.1	OG0000614	7.69851	7.6066	7.57949	0	0	4.31207	8.25253	7.87629	8.3103	9.48046	9.7999	9.73884	6.51829	6.16236	6.41344	6.41893	5.97152	6.71893	6.42564	6.38867	5.77235	6.17472	5.97579	6.20617	6.29157	6.51612	6.4585	blue	-0.4077	0.898059	0.706762	0.625288	0.565064	-0.621611	-0.159254	0.404749	-0.0324232	0.379574	0.0347784	2.11233e-10	3.77441e-05	0.000487578	0.00213284	0.000538177	0.427524	0.0362431	0.872451	0.050845
D-dichotoma_M_contig567.16427.1	OG0009356	5.84245	7.15477	6.18747	0	0	0	7.45955	4.35734	4.75152	6.87694	7.25521	6.47146	2.64362	4.19595	4.04389	4.79003	4.80959	3.35841	3.95655	3.80504	3.87941	4.96402	4.53259	4.61179	4.0936	4.9321	4.35314	blue	-0.371576	0.91986	0.685379	0.657895	0.677646	-0.670325	-0.151502	0.265088	-0.0607779	0.305326	0.0563431	1.17762e-11	7.98177e-05	0.000191783	0.000103091	0.000130452	0.450642	0.181447	0.763303	0.121454
D-dichotoma_M_contig567.16431.1	OG0009357	0	0	0	2.73491	0	0	0	0	0	3.01127	0	0	0.778857	1.20958	1.47557	1.4026	2.72989	1.42381	1.13347	1.08322	0	0	2.04056	1.70259	1.6306	0.719506	1.36514	NA	NA	NA	NA	NA	NA	NA	NA	NA	NA	NA	NA	NA	NA	NA	NA	NA	NA	NA	NA	NA
D-dichotoma_M_contig2917.10093.1	OG0009358	5.97151	5.42373	6.18747	0	0	0	6.54091	5.32171	6.2021	6.23186	3.47482	4.0834	0	0	0	0	0	0	1.92055	1.7913	0	0	0	0	0	0	0	brown	0.224357	0.724786	0.0960978	0.957976	0.542202	-0.776033	-0.571087	-0.120381	-0.702966	0.0183315	0.26057	1.90523e-05	0.633492	4.54156e-15	0.00348254	1.96834e-06	0.00186339	0.549771	4.33129e-05	0.927688
D-dichotoma_M_contig2919.10094.1	OG0009359	3.17858	4.45696	3.77451	4.16764	0	0	4.98661	3.96558	5.0056	5.55175	4.40844	4.63971	3.49306	4.11082	2.74395	3.31462	2.68003	4.22271	5.70423	6.10895	3.91843	3.92347	5.24221	5.34644	5.35983	4.11944	3.92449	turquoise	-0.416047	0.572831	0.629208	0.224106	0.123893	-0.287181	-0.0500964	0.50085	0.272143	0.266061	0.0308898	0.00179109	0.000438252	0.261118	0.538102	0.146383	0.804021	0.00779078	0.16967	0.17979
D-dichotoma_M_contig2927.10128.1	OG0000615	7.77124	7.71852	7.21908	3.62227	5.41954	3.38293	7.83423	7.54087	8.10817	9.43702	9.73286	9.50546	8.09272	7.37167	7.84008	8.36366	7.88846	7.44809	7.36942	7.68306	7.76852	7.44348	8.02899	7.54186	7.44546	7.92895	7.80061	blue	-0.608653	0.819747	0.798727	0.393707	0.501867	-0.419294	0.0644682	0.207439	0.238981	0.509887	0.000754904	1.68297e-07	5.91398e-07	0.0421682	0.00764682	0.0294752	0.749372	0.299164	0.22994	0.00658846
D-dichotoma_M_contig2929.10130.1	OG0009360	6.19942	6.31485	6.26884	8.89543	9.87882	8.28657	6.80136	6.11352	6.91062	7.73391	8.51273	7.17562	8.11648	8.81192	8.27111	7.98013	7.59252	7.78543	7.63071	7.16745	6.98725	6.30973	8.62481	8.80997	8.37504	7.58796	7.37237	blue	0.202857	-0.665854	-0.424801	-0.536897	-0.635227	0.840993	0.676419	-0.298222	0.246183	0.340928	0.310201	0.000150152	0.0271958	0.00388342	0.000371013	3.96521e-08	0.000107287	0.130813	0.215778	0.0818141
D-dichotoma_M_contig2609.9000.1	OG0009361	0	0	2.38634	7.09563	5.99322	6.25655	2.8361	2.5544	2.62933	0	3.47482	0	2.33801	2.81525	3.45592	2.56836	2.20345	1.08539	3.06387	2.26417	0.853502	1.08335	3.55166	1.36647	1.73524	2.76968	4.35314	turquoise	0.616322	-0.75463	-0.719133	-0.370346	-0.400502	0.596577	0.242534	-0.271937	-0.155535	-0.0824696	0.000618993	5.42653e-06	2.37398e-05	0.0572285	0.0384378	0.0010216	0.222879	0.170006	0.438533	0.68258
D-dichotoma_M_contig2612.9014.1	OG0000616	7.47728	7.3983	7.25945	3.62227	0	0	7.75442	6.88242	7.42781	6.23186	5.94738	5.82865	9.04256	8.81696	9.24822	8.15948	8.04315	8.44279	8.84249	8.3512	8.71762	8.57391	8.68184	8.51327	8.44999	7.99138	8.46557	turquoise	-0.848104	0.59402	0.942715	-0.0957514	0.135233	-0.376973	0.0555376	0.652458	0.663907	-0.05528	2.33073e-08	0.00108751	2.00854e-13	0.634723	0.501238	0.0525846	0.783209	0.000225771	0.000159525	0.784192
D-dichotoma_M_contig2615.9016.1	OG0009362	4.93224	5.99745	3.77451	0	0	0	4.27966	5.32171	5.98297	5.7541	5.94738	5.35334	6.2554	5.16663	4.17768	5.12811	5.86398	4.9016	5.21776	4.94293	5.02096	5.52767	6.78579	4.54368	5.22257	5.40543	6.7849	turquoise	-0.718782	0.752745	0.908883	0.183108	0.429541	-0.468902	0.084458	0.481831	0.436473	0.232737	2.40617e-05	5.90456e-06	5.51475e-11	0.360611	0.0253503	0.0136178	0.675333	0.0109307	0.0228352	0.242709
D-dichotoma_M_contig2615.9017.1	OG0009363	5.62424	5.23588	6.00954	0	0	0	5.45897	5.32171	5.40936	6.36144	6.52453	6.18557	7.52915	5.62373	5.79433	5.94573	6.04722	5.9576	5.65381	5.39815	4.43132	5.53928	7.58753	5.20367	5.3922	5.5318	6.95031	turquoise	-0.736048	0.767393	0.925374	0.190789	0.32215	-0.442634	0.124385	0.495681	0.450605	0.245457	1.2094e-05	3.00219e-06	4.97996e-12	0.340461	0.101264	0.0207744	0.536477	0.00855765	0.018336	0.217177
D-dichotoma_M_contig2615.9018.1	OG0009364	0	0	0	0	0	0	0	2.5544	0	0	0	0	0	0	0	0.449203	0	0	0	0	0	0	0	0	0	0	0	NA	NA	NA	NA	NA	NA	NA	NA	NA	NA	NA	NA	NA	NA	NA	NA	NA	NA	NA	NA	NA
D-dichotoma_M_contig2617.9020.1	OG0009365	8.57829	7.04455	8.52694	15.001	14.7496	15.0776	7.79488	6.82155	7.63024	4.87041	4.40844	5.61048	3.1495	2.81525	5.68871	4.50681	2.46133	3.90923	5.40555	5.75566	3.52224	4.91134	4.44363	5.51953	2.95515	7.27314	6.5176	turquoise	0.921866	-0.576323	-0.915092	0.0809532	-0.175416	0.215452	-0.198428	-0.520404	-0.663508	-0.289759	8.67328e-12	0.00165352	2.36226e-11	0.688125	0.38148	0.280461	0.321106	0.00539001	0.000161503	0.142634
D-dichotoma_M_contig2619.9028.1	OG0000617	7.49885	7.88768	7.04524	10.6405	8.91199	10.3985	8.1155	7.64993	8.21277	8.85676	9.29534	8.55411	6.93033	7.44306	7.77471	7.36164	6.90135	6.7828	7.47484	7.26722	6.24869	6.01748	7.15323	7.38917	7.02288	6.71569	6.17883	turquoise	0.790229	-0.365174	-0.784552	0.300475	-0.162624	0.324506	-0.00207066	-0.320135	-0.68673	0.282177	9.43682e-07	0.0610704	1.27448e-06	0.12779	0.41768	0.0986502	0.991822	0.103541	7.62684e-05	0.153861
D-dichotoma_M_contig2619.9029.1	OG0009366	1.88155	0	0	9.61045	8.55919	9.50632	0	0	0	3.01127	0	0	0	1.03574	1.64945	1.06754	0	0.880852	1.99445	1.22805	0	0.804027	1.14471	0.745413	1.11415	1.44589	1.0361	turquoise	0.76116	-0.843964	-0.930272	-0.280459	-0.467511	0.619187	0.10011	-0.427385	-0.344338	-0.0925551	4.02674e-06	3.18599e-08	2.18977e-12	0.156491	0.0139371	0.00057399	0.619314	0.0261767	0.0786101	0.646118
D-dichotoma_M_contig100.99.1	OG0000618	6.03195	7.3983	6.48855	13.4064	13.0686	13.0659	7.05559	7.71831	7.87303	8.37915	8.4305	8.21002	7.26395	7.0813	7.16824	7.60302	6.97039	7.0164	7.0128	7.26092	7.47336	6.92892	7.34965	7.29495	6.88467	7.3167	7.01033	turquoise	0.799029	-0.778331	-0.965943	-0.141926	-0.302682	0.591157	0.0767349	-0.515447	-0.479589	0.0690844	5.81431e-07	1.75385e-06	3.42611e-16	0.480089	0.124879	0.0011657	0.703633	0.00592961	0.011362	0.732053
D-dichotoma_M_contig101.158.1	OG0009367	2.67116	0	3.24132	7.75471	5.99322	7.56711	3.35209	0	2.62933	0	0	0	0	0	0	0	0	0	0	0	0	0	0.428685	2.05547	0	3.39008	4.38976	turquoise	0.872856	-0.633028	-0.824983	-0.0802529	-0.147299	0.306054	0.0275453	-0.360949	-0.462444	-0.26155	2.90274e-09	0.00039445	1.1999e-07	0.690691	0.463445	0.120524	0.891519	0.0643546	0.0151524	0.187562
D-dichotoma_M_contig101.159.1	OG0009368	0	2.64168	2.38634	0	0	0	2.02518	4.35734	0	0	3.47482	0	0	0	0.776001	0	0	0	0.483315	0.29131	0	0	0.428685	0	0.302097	0.896975	0	NA	NA	NA	NA	NA	NA	NA	NA	NA	NA	NA	NA	NA	NA	NA	NA	NA	NA	NA	NA	NA
D-dichotoma_M_contig101.167.1	OG0009369	0	0	3.24132	8.87819	8.63699	8.99527	0	0	0	2.17994	3.47482	0	0	0	0	0	0	0	0.844711	0.533566	0	0	0	2.33877	0.302097	2.15336	3.87369	turquoise	0.847424	-0.752772	-0.907175	-0.164831	-0.262351	0.537986	0.135765	-0.470734	-0.429963	0.00618787	2.45519e-08	5.89761e-06	6.88999e-11	0.411304	0.186166	0.00379812	0.499542	0.0132067	0.0251909	0.975563
D-dichotoma_M_contig101.169.1	OG0009370	3.55322	0	2.38634	8.11999	8.55919	7.49351	3.73137	0	0	3.01127	0	4.0834	0.562846	0.336329	0.439558	0	0	0.356693	1.48067	1.22805	0	2.3513	0.899188	0.927471	0.302097	1.55574	3.10725	turquoise	0.833112	-0.637007	-0.882729	-0.0235469	-0.222945	0.41926	-0.0257446	-0.533588	-0.506702	-0.040713	6.93851e-08	0.000352936	1.11704e-09	0.907193	0.263662	0.0294898	0.898574	0.00415288	0.00699296	0.840211
D-dichotoma_M_contig101.170.1	OG0009371	0	0	0	9.77785	9.24579	9.66559	0	0	2.62933	2.17994	0	0	1.94975	2.91906	2.7818	2.61212	2.57482	0.356693	2.84162	2.26417	1.38613	1.69506	2.21197	3.83831	3.07962	2.81457	4.19662	blue	0.628945	-0.925157	-0.816586	-0.518935	-0.50154	0.73999	0.330075	-0.343945	-0.0836144	-0.10118	0.000441418	5.15775e-12	2.05363e-07	0.00554542	0.00769286	1.02602e-05	0.0926734	0.0789746	0.678404	0.615553
D-dichotoma_M_contig695.17825.1	OG0000619	8.10245	9.12024	8.10769	4.16764	0	6.25655	8.69873	8.47905	8.10817	8.09231	7.9884	8.04555	6.09344	7.46895	6.32005	6.3656	6.35984	6.30333	6.61911	6.04194	6.25632	6.56973	6.53437	6.2917	6.25684	5.97407	5.90298	blue	-0.271175	0.827573	0.572929	0.662118	0.533873	-0.723464	-0.28803	0.578185	-0.179246	0.100577	0.171253	1.01088e-07	0.00178706	0.000168584	0.00412903	2.0067e-05	0.145141	0.00158393	0.371003	0.617672
D-dichotoma_M_contig695.17828.1	OG0000620	10.3654	11.027	9.94573	5.98251	6.40259	6.25655	10.923	10.4052	10.0058	10.6188	10.2589	10.0631	8.81234	9.98268	9.03311	8.99184	8.9086	9.03141	9.25658	8.97854	9.1987	9.06571	9.31153	9.55346	9.33486	8.81368	8.74798	blue	-0.469796	0.974489	0.752013	0.654463	0.532694	-0.774312	-0.238108	0.278752	-0.029286	0.166014	0.013416	9.68714e-18	6.10031e-06	0.000212671	0.00422833	2.14412e-06	0.231698	0.159134	0.884707	0.407908
D-dichotoma_M_contig696.17831.1	OG0000052	6.34946	5.01986	6.00954	0	0	0	6.80136	5.63641	5.22156	6.69222	5.37406	5.04021	8.28044	8.1079	7.48744	6.98271	7.46399	7.95157	7.37635	7.32473	6.91674	7.36405	7.15148	7.76614	7.96448	7.05431	6.77109	turquoise	-0.893699	0.605389	0.968168	-0.102674	0.103921	-0.314918	0.133663	0.574277	0.70977	0.0716769	3.47999e-10	0.000820206	1.48989e-16	0.61032	0.605969	0.10961	0.506267	0.00173297	3.37922e-05	0.722381
D-dichotoma_M_contig696.17833.1	OG0009372	1.88155	2.64168	0	0	0	0	5.24204	0	0	4.68479	0	0	1.54039	4.5594	3.20043	3.57997	3.35612	2.38054	3.31527	2.61971	2.54629	2.12329	3.21787	3.50745	3.97038	2.85811	2.37926	NA	NA	NA	NA	NA	NA	NA	NA	NA	NA	NA	NA	NA	NA	NA	NA	NA	NA	NA	NA	NA
D-dichotoma_M_contig697.17835.1	OG0009373	5.45797	6.21661	6.34585	10.4726	11.0155	10.6393	5.24204	6.47145	7.33815	7.93466	8.38756	7.46331	8.19728	7.70689	7.63821	8.08575	8.1035	8.33288	8.36418	8.713	9.03969	8.4851	8.65609	7.8489	7.58151	8.61546	8.65704	blue	0.325484	-0.880654	-0.608616	-0.653977	-0.432764	0.856438	0.312871	-0.27165	0.150759	0.174742	0.0975803	1.37474e-09	0.000755621	0.000215782	0.0241543	1.20712e-08	0.112064	0.170475	0.452892	0.383341
D-dichotoma_M_contig697.17836.1	OG0009374	1.88155	4.06365	4.16295	8.86074	9.03205	8.1008	3.73137	3.42606	5.0056	5.7541	7.34773	4.0834	5.66183	4.29575	5.07001	5.42653	5.44604	5.24885	5.55957	6.14132	6.15378	5.12687	6.01105	4.39699	4.32917	5.61028	5.47907	blue	0.459326	-0.787721	-0.693254	-0.430902	-0.32482	0.771505	0.206879	-0.358075	-0.0711167	0.244129	0.0159429	1.07889e-06	6.10227e-05	0.0248395	0.0983055	2.46127e-06	0.3005	0.0666658	0.724468	0.219755
D-dichotoma_M_contig697.17838.1	OG0009375	3.85035	4.45696	3.24132	9.50207	9.59675	9.12279	4.4914	3.42606	4.44292	5.03484	5.94738	6.8159	6.71131	5.2782	6.40436	6.00847	6.24451	5.58019	6.15861	6.61301	6.88754	5.03138	6.62819	5.25569	4.8556	5.89789	5.85141	blue	0.43037	-0.872432	-0.707144	-0.537458	-0.472151	0.861136	0.297487	-0.324028	0.00949578	0.185893	0.025038	3.01881e-09	3.72203e-05	0.00383928	0.0128958	8.17904e-09	0.131811	0.0991759	0.962507	0.353226
D-dichotoma_M_contig697.17839.1	OG0000621	0	3.52119	0	8.45839	8.47695	8.4895	0	2.5544	3.50777	3.9189	5.94738	5.82865	4.53536	3.84695	4.55089	4.47161	4.4268	4.63468	4.47835	5.52275	4.96616	2.87592	5.53915	4.00966	3.23046	4.54943	4.40772	blue	0.383331	-0.775786	-0.623007	-0.475184	-0.412361	0.82617	0.340446	-0.271263	0.0111455	0.323874	0.0484123	1.99276e-06	0.000518458	0.0122509	0.0325615	1.10965e-07	0.082274	0.171109	0.955999	0.0993462
D-dichotoma_M_contig698.17848.1	OG0009376	6.89636	7.48526	7.17754	6.68411	7.97613	5.84779	7.382	6.99696	6.71078	8.4391	8.66434	8.08846	9.46262	7.09522	7.34773	7.92699	8.16822	7.52919	7.17057	7.01357	7.59876	8.14263	9.22325	7.49394	7.99246	8.69114	9.43534	grey	-0.344135	0.143994	0.383957	-0.168802	0.184287	0.130523	0.522788	-0.000818183	0.43341	0.420983	0.0787985	0.473647	0.0480164	0.399967	0.357475	0.516397	0.00514567	0.996768	0.0239203	0.0287604
D-dichotoma_M_contig699.17851.1	OG0009377	7.60214	7.44244	8.23462	11.8179	11.8288	12.0865	8.39093	7.93494	8.13504	8.91069	9.09637	9.42405	8.64013	9.16456	9.43278	10.0115	9.72585	9.10233	9.41046	9.54104	9.23682	9.05057	8.77481	9.40686	8.74607	9.48327	9.22791	blue	0.506597	-0.915786	-0.760465	-0.546759	-0.440393	0.874422	0.307859	-0.316379	-0.0136446	0.137138	0.00700666	2.13998e-11	4.15834e-06	0.00316697	0.0215057	2.50801e-09	0.11824	0.107884	0.946146	0.495174
D-dichotoma_M_contig682.17703.1	OG0009378	5.90842	7.3983	7.3742	8.77018	8.848	8.7328	6.09907	7.87629	6.71078	4.87041	5.68902	5.61048	6.38461	5.67653	6.49261	7.19361	7.63403	6.81909	5.95156	6.11827	8.27441	7.98165	6.01105	5.62216	6.64045	7.73532	7.56478	turquoise	0.382377	-0.611925	-0.574046	-0.336531	0.02263	0.176274	-0.161841	-0.290594	-0.195333	-0.513547	0.049021	0.000694042	0.00174215	0.0860895	0.910793	0.37912	0.419957	0.141435	0.328865	0.00614814
D-dichotoma_M_contig684.17722.1	OG0000334	11.0402	11.2576	11.1735	7.41545	8.09117	6.83521	10.7791	10.7039	11.2945	10.3605	10.7491	10.9093	10.7852	9.56787	10.7953	9.97558	9.88904	10.1652	10.2568	10.3163	10.6654	10.1751	10.0794	9.5153	9.74595	9.69616	10.1088	blue	-0.578861	0.92546	0.788363	0.532809	0.509896	-0.771386	-0.337172	0.234617	0.0472809	0.0487331	0.00155931	4.91077e-12	1.0427e-06	0.00421858	0.00658736	2.47564e-06	0.0854561	0.238816	0.814842	0.809256
D-dichotoma_M_contig685.17728.1	OG0009379	4.49042	3.52119	4.46868	6.68411	8.55919	7.41595	6.76108	5.48762	4.44292	3.9189	3.47482	0	1.28187	1.85814	2.34941	1.49898	0	1.42381	3.60201	2.56621	3.7556	2.54814	4.00462	1.79923	2.24091	2.62596	3.76639	turquoise	0.796671	-0.356196	-0.74968	0.217361	-0.0748444	0.00984614	-0.325706	-0.537893	-0.652242	-0.265562	6.63523e-07	0.0682113	6.76303e-06	0.276116	0.710621	0.961125	0.0973382	0.00380528	0.000227227	0.180638
D-dichotoma_M_contig685.17732.1	OG0009380	6.44146	6.49329	4.93537	0	0	0	5.96367	5.13421	4.04982	5.18244	4.97057	4.63971	3.74488	5.09086	5.07001	4.68127	3.81465	5.1611	4.52897	4.58775	2.21131	3.20252	4.45506	5.77256	5.79459	4.17214	2.64463	turquoise	-0.549565	0.84891	0.779572	0.441511	0.215777	-0.622113	-0.0775833	0.367765	0.162358	0.0604162	0.002985	2.19093e-08	1.64696e-06	0.0211381	0.279719	0.000531014	0.700505	0.0591215	0.418455	0.764673
D-dichotoma_M_contig686.17737.1	OG0000622	9.28506	9.84251	9.6288	4.16764	4.45286	4.31207	8.81148	9.61793	9.70766	9.33815	10.3058	10.1159	8.68682	8.2428	8.54387	9.65936	9.07337	7.88294	7.62199	7.95172	8.68829	8.76043	8.19234	8.28827	7.84241	8.61149	8.89612	blue	-0.569924	0.924076	0.818258	0.522733	0.673708	-0.692616	-0.116884	0.344635	0.0908934	0.228174	0.001913	6.13356e-12	1.84919e-07	0.00515114	0.0001171	6.23835e-05	0.561506	0.0783353	0.652074	0.252332
D-dichotoma_M_contig686.17738.1	OG0009381	6.95996	6.72535	6.00954	2.73491	0	0	7.05559	6.00821	5.40936	6.16243	6.93564	6.18557	6.58793	6.76343	7.24477	5.81611	5.40826	5.99615	5.7315	5.87047	5.02096	5.11139	6.84343	6.82963	6.99153	5.83935	5.10261	turquoise	-0.679507	0.81	0.884579	0.293258	0.224316	-0.516614	0.0664119	0.547438	0.350447	0.163521	9.70002e-05	3.07235e-07	9.25295e-10	0.137657	0.260659	0.00579859	0.742064	0.00312204	0.0731117	0.415082
D-dichotoma_M_contig686.17741.1	OG0009382	0	0	0	0	0	0	0	0	0	0	0	0	0	0	0	0	0	0	0	0	0	0	0	0	0	0	0	NA	NA	NA	NA	NA	NA	NA	NA	NA	NA	NA	NA	NA	NA	NA	NA	NA	NA	NA	NA	NA
D-dichotoma_M_contig3165.10933.1	OG0009383	0	0	0	0	0	0	0	0	0	0	0	0	0	0	0	0	0	0	0	0	0	0	0	0	0	0	0	NA	NA	NA	NA	NA	NA	NA	NA	NA	NA	NA	NA	NA	NA	NA	NA	NA	NA	NA	NA	NA
D-dichotoma_M_contig3172.10949.1	OG0000052	4.30692	5.99745	0	0	0	0	4.67601	2.5544	2.62933	5.65647	5.37406	5.35334	6.89606	8.21247	6.62084	7.49031	6.93096	7.15061	7.27434	7.20513	6.61808	6.91561	6.90304	7.64622	7.40241	6.96504	6.01856	turquoise	-0.827336	0.327307	0.806319	-0.333099	-0.0229102	0.0470079	0.330355	0.520203	0.820981	0.26167	1.02693e-07	0.0956083	3.82253e-07	0.089544	0.909692	0.815893	0.0923794	0.005411	1.55554e-07	0.187352
D-dichotoma_M_contig3172.10950.1	OG0009384	0	0	0	0	0	0	0	0	0	3.53532	3.47482	0	5.30931	3.27259	5.99701	4.79003	5.22046	5.51973	6.5225	7.22469	3.18092	2.45307	5.86881	5.79617	5.90527	3.90786	2.76101	yellow	-0.680757	-0.0470464	0.542977	-0.61204	-0.449974	0.393086	0.432223	0.435932	0.871456	0.215696	9.30917e-05	0.815745	0.00342709	0.000691972	0.0185201	0.0425228	0.0243518	0.0230241	3.30214e-09	0.279903
D-dichotoma_M_contig3172.10951.1	OG0009385	0	0	0	0	0	0	0	0	0	0	0	0	0.562846	1.20958	0.918746	0.449203	0	0.880852	1.37396	1.7913	0.853502	0.804027	0.603131	1.08911	1.51777	0.517103	0	NA	NA	NA	NA	NA	NA	NA	NA	NA	NA	NA	NA	NA	NA	NA	NA	NA	NA	NA	NA	NA
D-dichotoma_M_contig3172.10952.1	OG0009386	0	0	0	0	0	0	4.27966	0	0	3.01127	4.40844	4.63971	4.04513	4.54324	5.00749	4.49517	5.24638	4.63468	5.54734	6.20397	3.79806	3.81295	5.22896	5.09366	5.63469	4.22298	4.1758	turquoise	-0.67797	0.104409	0.617771	-0.44921	-0.1928	0.356291	0.449696	0.444606	0.825311	0.456182	0.000102007	0.604266	0.000595859	0.018745	0.3353	0.0681326	0.0186016	0.0201477	1.17436e-07	0.0167742
D-dichotoma_M_contig3064.10609.1	OG0009387	5.5435	5.23588	4.72082	0	0	0	4.83965	3.42606	3.50777	3.53532	3.47482	4.0834	4.71647	1.50476	7.16824	6.3463	0	3.93592	6.99265	6.42669	1.77427	4.32353	0	0	0	0	0.609128	blue	-0.334868	0.520475	0.386695	0.352837	0.123628	-0.428053	-0.538362	0.159052	-0.0654913	-0.0673511	0.0877512	0.00538255	0.0463132	0.0710429	0.538979	0.0259184	0.00376897	0.428118	0.745523	0.738541
D-dichotoma_M_contig3071.10625.1	OG0009388	3.55322	0	2.38634	3.62227	5.41954	3.38293	4.98661	0	2.62933	2.17994	3.47482	0	0	0	0	0	0	0.642448	0.6753	0.29131	0	0.457315	0	0.537017	0.302097	0	0	NA	NA	NA	NA	NA	NA	NA	NA	NA	NA	NA	NA	NA	NA	NA	NA	NA	NA	NA	NA	NA
D-dichotoma_M_contig3072.10627.1	OG0009389	1.88155	4.06365	3.24132	0	0	0	4.03141	0	4.44292	3.01127	0	0	5.50392	3.49045	1.38009	4.25411	4.83259	5.94452	0.483315	0.533566	0	5.70318	7.52927	5.22992	6.78459	5.35314	5.15673	turquoise	-0.468937	0.185382	0.510245	-0.252442	0.00845368	-0.113395	0.379545	0.330207	0.537408	-0.153724	0.0136098	0.354576	0.00654419	0.20396	0.966619	0.573327	0.0508646	0.0925348	0.00384321	0.443948
D-dichotoma_M_contig108.688.1	OG0009390	8.22402	7.75398	6.79358	7.26438	0	6.06659	10.0544	6.47145	6.78051	8.90006	4.97057	7.32663	8.5892	7.11175	5.92694	5.12056	5.17618	6.03985	7.02608	6.09957	6.33052	6.51783	7.49647	8.22444	7.61618	6.44652	6.11465	turquoise	-0.182301	0.484392	0.428372	0.322695	0.119777	-0.400072	-0.0314367	0.65713	0.0489107	0.0112644	0.36277	0.0104548	0.0257955	0.100655	0.551791	0.0386655	0.876302	0.000196275	0.808574	0.95553
D-dichotoma_M_contig108.694.1	OG0000623	5.62424	4.45696	4.72082	11.7579	10.1147	11.7338	6.09907	6.00821	6.56031	4.47172	0	4.63971	3.02816	3.73762	4.44871	3.72651	2.82472	2.78455	5.12209	4.74046	1.77427	3.01555	3.73153	4.14453	3.49174	4.02709	5.67722	turquoise	0.848371	-0.618253	-0.86421	-0.0288667	-0.307078	0.283438	-0.0941982	-0.401278	-0.52762	-0.321642	2.28363e-08	0.000588335	6.29123e-09	0.886347	0.119225	0.151952	0.64025	0.0380293	0.00467914	0.101834
D-dichotoma_M_contig109.773.1	OG0009391	4.79946	5.01986	3.24132	0	0	0	4.27966	3.96558	0	3.9189	4.40844	4.63971	3.29688	4.74033	4.30012	4.52981	4.25012	4.40566	3.861	4.20575	3.52224	3.95851	4.37312	4.18085	4.73459	4.23953	3.70959	NA	NA	NA	NA	NA	NA	NA	NA	NA	NA	NA	NA	NA	NA	NA	NA	NA	NA	NA	NA	NA
D-dichotoma_M_contig109.781.1	OG0009392	0	0	0	0	0	0	0	0	0	0	0	0	0.778857	0	0	0	0	0	0	0	0	0	0	0	0	0	0	NA	NA	NA	NA	NA	NA	NA	NA	NA	NA	NA	NA	NA	NA	NA	NA	NA	NA	NA	NA	NA
D-dichotoma_M_contig2872.9915.1	OG0009393	0	0	0	0	0	0	0	0	0	0	0	0	0	1.85814	0.439558	0	0.293208	0.356693	0.483315	0.740931	0	0.457315	0.75874	0.537017	1.51777	0.281597	0	NA	NA	NA	NA	NA	NA	NA	NA	NA	NA	NA	NA	NA	NA	NA	NA	NA	NA	NA	NA	NA
D-dichotoma_M_contig2872.9916.1	OG0009394	0	0	0	0	0	0	0	0	0	0	0	0	0	0	0	0	0.293208	0	0.6753	0.740931	0	0	0	0	0	0	0	NA	NA	NA	NA	NA	NA	NA	NA	NA	NA	NA	NA	NA	NA	NA	NA	NA	NA	NA	NA	NA
D-dichotoma_M_contig2875.9919.1	OG0000216	4.30692	4.06365	4.16295	5.98251	5.41954	6.5747	6.28097	5.32171	6.6375	8.03519	7.34773	7.00694	7.27733	6.95877	6.91504	6.52287	6.17871	6.22435	7.01724	7.28388	6.53892	5.44361	7.3389	6.8719	6.47276	6.26435	6.3088	grey	-0.208989	-0.106695	0.169159	-0.272944	-0.256136	0.560976	0.497807	0.270051	0.439884	0.730686	0.295486	0.596329	0.398955	0.168368	0.197195	0.00233426	0.00823491	0.173104	0.0216745	1.50572e-05
D-dichotoma_M_contig2875.9920.1	OG0000003	0	0	0	6.60247	0	4.31207	2.02518	0	0	3.9189	5.37406	3.16609	1.65412	3.31127	1.16778	3.1162	1.36599	3.35841	4.0805	3.63358	2.21131	2.24179	3.94104	4.23368	3.43072	2.62596	1.75018	grey	0.0961388	-0.388875	-0.164363	-0.325916	-0.349642	0.675281	0.38683	0.355879	0.246489	0.551387	0.633347	0.0449913	0.412653	0.0971106	0.0738191	0.000111312	0.0462302	0.0684748	0.21519	0.00287175
D-dichotoma_M_contig2876.9925.1	OG0009395	7.92258	7.95016	7.21908	0	0	0	9.03059	7.05099	6.97152	8.01563	8.25048	8.78033	1.54039	0.336329	2.13218	0.630339	2.77808	3.73784	6.36076	5.42094	0.853502	2.24179	4.09502	1.59901	1.73524	1.32698	1.20998	brown	0.0131865	0.800775	0.287791	0.885871	0.465859	-0.687328	-0.527973	0.006042	-0.509687	0.213878	0.947951	5.26699e-07	0.14549	8.09604e-10	0.014324	7.47415e-05	0.00464649	0.976139	0.00661323	0.284075
D-dichotoma_M_contig2881.9945.1	OG0000003	5.36704	7.20688	6.48855	4.87213	7.20261	5.84779	7.50902	6.69152	7.59196	6.96113	7.34773	7.00694	3.6926	2.51746	2.99017	3.48903	3.53506	2.7246	3.75868	3.73404	3.91843	3.01555	4.37312	3.11545	2.24091	4.15478	3.89931	yellow	0.621869	0.291678	-0.39532	0.827723	0.488749	-0.391954	-0.409593	-0.507789	-0.900133	0.178114	0.000534489	0.139889	0.0412577	1.00076e-07	0.00968474	0.0431754	0.0338635	0.00685266	1.65272e-10	0.374084
D-dichotoma_M_contig2881.9948.1	OG0009396	4.09662	2.64168	4.46868	6.97106	6.98185	7.1546	3.73137	4.66512	4.75152	5.84553	5.37406	5.35334	7.04685	6.10848	7.14119	7.30944	6.52429	6.70736	6.43894	6.91001	6.75909	6.42694	6.76757	6.37245	6.499	6.50931	7.09592	brown	-0.135784	-0.711531	-0.150991	-0.867258	-0.540055	0.84515	0.541417	0.0886297	0.624902	0.176394	0.49948	3.16541e-05	0.452187	4.81935e-09	0.00364032	2.91571e-08	0.00353953	0.660221	0.000492686	0.37879
D-dichotoma_M_contig2881.9950.1	OG0009397	4.79946	0	4.16295	0	0	0	2.02518	0	5.57551	5.18244	5.37406	4.63971	2.11778	2.64404	3.22812	2.52324	3.6431	0.880852	2.19584	1.96671	1.77427	1.51849	3.41794	2.05547	1.6306	1.92676	2.81586	blue	-0.224949	0.588664	0.432693	0.445549	0.415269	-0.275077	0.101067	0.17051	-0.0342585	0.491022	0.259281	0.00123766	0.0241803	0.0198538	0.0312366	0.164934	0.615952	0.395146	0.865294	0.00930239
D-dichotoma_M_contig2881.9951.1	OG0009398	4.49042	5.01986	4.93537	0	0	0	4.4914	0	5.85951	4.68479	5.37406	5.35334	2.33801	3.64982	3.47915	3.64461	4.83259	2.59664	2.5788	3.02858	2.07981	2.87592	4.18009	3.38824	3.07962	2.67547	3.19262	blue	-0.374217	0.759581	0.605757	0.505247	0.515366	-0.473841	-0.00179565	0.245888	0.00943202	0.320826	0.0544786	4.33164e-06	0.000812594	0.00718451	0.00593879	0.0125332	0.992908	0.216346	0.962759	0.102755
D-dichotoma_M_contig4386.14046.1	OG0009399	3.17858	0	0	6.83471	0	5.58975	2.8361	0	0	4.47172	4.40844	4.0834	4.10636	4.3709	4.01239	3.82276	3.59009	0.642448	1.67299	2.61971	0.488969	0	5.70144	4.81035	5.43943	5.19235	5.63971	pink	0.182562	-0.33577	-0.111295	-0.305493	-0.278232	0.567099	0.796377	0.363133	0.267264	0.415566	0.36207	0.0868473	0.580493	0.12124	0.159946	0.00203828	6.7447e-07	0.0626404	0.177755	0.031104
D-dichotoma_M_contig4386.14047.1	OG0009400	3.85035	0	0	0	0	0	3.73137	2.5544	4.44292	5.65647	0	3.16609	5.79178	5.72746	5.34749	5.29176	2.72989	4.30689	2.75922	2.39267	5.05638	4.32353	5.62763	5.40135	4.67006	3.86582	3.68033	turquoise	-0.658449	0.267775	0.647812	-0.26228	-0.0711318	-0.00943432	0.36212	0.421921	0.677117	0.145441	0.000188588	0.176896	0.000258901	0.186289	0.724411	0.96275	0.0634307	0.0283692	0.000104881	0.469168
D-dichotoma_M_contig4398.14060.1	OG0009401	4.30692	4.45696	0	8.4814	7.39403	6.94971	6.98741	2.5544	4.44292	6.16243	3.47482	4.63971	5.0843	5.76972	4.41297	5.07438	3.71913	4.44335	4.70437	4.50487	5.42485	4.54714	5.00632	5.45425	4.78422	4.65194	5.27889	blue	0.445693	-0.627636	-0.56911	-0.321159	-0.336632	0.627343	0.266189	-0.233817	-0.0114511	0.163206	0.019809	0.000457486	0.00194843	0.102378	0.08599	0.000461142	0.179573	0.240469	0.954794	0.415995
D-dichotoma_M_contig4398.14061.1	OG0009402	2.67116	0	3.24132	8.38704	8.63699	6.94971	6.28097	2.5544	2.62933	6.87694	0	4.0834	3.63835	5.41765	3.40832	4.98568	4.86642	4.60172	4.81048	4.60111	5.28257	4.26875	4.95896	5.64834	4.42615	4.62698	4.98788	blue	0.368423	-0.708181	-0.544546	-0.476717	-0.422159	0.6703	0.280196	-0.273931	0.113452	0.0240598	0.058634	3.58315e-05	0.003317	0.0119352	0.0282708	0.000130555	0.156895	0.166772	0.573132	0.90518
D-dichotoma_M_contig4400.14090.1	OG0000102	0	0	0	0	0	0	2.02518	0	0	3.01127	0	0	7.21382	1.63242	2.99017	0.935998	4.48603	6.45863	2.06475	2.32985	6.71545	5.50415	1.53756	2.20406	2.61461	0.896975	4.277	green	-0.626877	-0.0418265	0.432959	-0.497243	-0.110719	0.134949	0.0675384	0.32756	0.666249	-0.00897831	0.000467028	0.835898	0.0240833	0.0083195	0.582467	0.502146	0.737839	0.0953379	0.000148312	0.964549
D-dichotoma_M_contig599.16844.1	OG0000624	7.49885	7.20688	7.54724	9.97725	10.5958	10.3576	6.54091	7.10307	7.29114	8.57889	9.04203	8.95279	6.84607	7.37396	6.89575	8.01824	7.98145	7.5766	6.70691	7.30853	8.90897	8.39686	6.4166	7.17626	6.74754	7.86369	8.40649	turquoise	0.631253	-0.615462	-0.778951	-0.0869066	0.0758633	0.48911	0.0194788	-0.491829	-0.416854	0.233926	0.000414296	0.000633085	1.69973e-06	0.666447	0.706852	0.00962323	0.923175	0.00916959	0.0305333	0.240242
D-dichotoma_M_contig599.16846.1	OG0000625	8.08829	7.98041	8.36985	14.8865	14.5018	14.6873	8.5172	8.71488	9.05016	10.1524	10.9543	10.7581	9.03208	8.04905	8.23319	8.81884	8.9214	9.04066	8.50358	8.86058	9.11929	9.23243	8.28568	8.12074	8.00167	8.75946	9.66088	turquoise	0.785844	-0.743247	-0.936772	-0.10912	-0.200701	0.591502	0.0436027	-0.500094	-0.48539	0.169698	1.1912e-06	8.9369e-06	6.67726e-13	0.587958	0.31548	0.00115601	0.829028	0.00789918	0.0102741	0.397432
D-dichotoma_M_contig601.16889.1	OG0009403	0	0	0	0	0	0	0	0	0	0	0	0	0	0	0	0	0	0	0	0	0	0	0	0	0	0	0	NA	NA	NA	NA	NA	NA	NA	NA	NA	NA	NA	NA	NA	NA	NA	NA	NA	NA	NA	NA	NA
D-dichotoma_M_contig601.16901.1	OG0009404	0	3.52119	0	0	0	0	2.02518	0	0	2.17994	0	0	0.308699	0	1.47557	0.935998	0	0.356693	0.6753	0.29131	0	0	0	0	1.2616	0.517103	1.20998	NA	NA	NA	NA	NA	NA	NA	NA	NA	NA	NA	NA	NA	NA	NA	NA	NA	NA	NA	NA	NA
D-dichotoma_M_contig848.19274.1	OG0009405	4.09662	2.64168	2.38634	4.16764	6.7211	6.42437	5.81423	2.5544	2.62933	6.29811	5.94738	5.82865	8.0902	9.23854	7.27826	8.29317	6.58988	8.28827	7.18642	6.77209	7.24685	7.93183	7.31245	8.41281	8.40112	8.27551	7.54056	yellow	-0.452846	-0.352417	0.24812	-0.753467	-0.405773	0.651144	0.604032	0.195227	0.832712	0.299014	0.0176947	0.0714026	0.212072	5.71716e-06	0.0357295	0.000234743	0.000848758	0.329134	7.13293e-08	0.129745
D-dichotoma_M_contig851.19306.1	OG0009406	5.05383	5.58992	5.12211	0	0	0	5.45897	5.77127	5.57551	5.43883	5.37406	6.47146	5.99973	5.84414	5.96857	6.96173	6.41803	6.27226	5.78454	6.41917	6.48795	6.67354	6.19263	6.0578	5.86547	6.39202	6.72167	turquoise	-0.840589	0.719712	0.979453	0.0584432	0.371826	-0.424049	0.0491661	0.54322	0.573144	0.159618	4.08332e-08	2.32163e-05	6.65636e-19	0.772155	0.0561644	0.0274984	0.807593	0.00340979	0.00177837	0.426457
D-dichotoma_M_contig851.19307.1	OG0009407	4.79946	4.06365	5.43573	0	0	0	5.81423	4.35734	5.72449	5.7541	5.37406	6.18557	6.22351	6.29851	5.96857	7.15715	6.58312	6.48145	6.3361	6.36145	7.4864	6.87951	6.53974	6.71354	6.15677	6.63977	7.15295	turquoise	-0.850207	0.617368	0.957411	-0.0651608	0.304473	-0.291074	0.126646	0.555786	0.672426	0.204807	1.98168e-08	0.000602222	5.3499e-15	0.746765	0.122551	0.140748	0.529038	0.00261331	0.000122012	0.305473
D-dichotoma_M_contig317.10938.1	OG0009408	4.6532	4.06365	5.43573	4.87213	4.45286	0	6.22285	4.35734	3.50777	5.03484	5.94738	5.04021	6.71131	8.29317	7.66124	7.98638	8.12345	8.01239	8.22816	7.72943	5.78296	6.54113	7.61197	7.69571	8.14864	7.75561	4.96379	turquoise	-0.760475	0.163445	0.650752	-0.437788	-0.256018	0.172047	0.339222	0.330979	0.805799	0.121607	4.15642e-06	0.415303	0.000237474	0.0223819	0.197409	0.390835	0.0834528	0.0917291	3.94084e-07	0.545686
D-dichotoma_M_contig318.10970.1	OG0009409	8.19787	7.35277	7.54724	12.2801	10.4526	12.2713	7.55686	6.99696	8.66398	8.11085	9.06946	8.00132	7.87247	8.26143	8.41355	8.77138	8.11995	7.64289	8.37026	8.56232	7.73613	7.44348	8.69093	8.68671	8.25917	8.50938	8.4407	turquoise	0.724504	-0.82791	-0.854514	-0.311888	-0.421205	0.698151	0.253079	-0.238765	-0.270863	0.0523702	1.92646e-05	9.88344e-08	1.41023e-08	0.113255	0.0286673	5.14219e-05	0.202782	0.230374	0.171765	0.795307
D-dichotoma_M_contig318.10971.1	OG0009410	4.79946	0	4.72082	7.79201	7.39403	5.84779	5.89089	5.48762	5.22156	3.9189	4.40844	3.16609	7.00726	5.20821	6.38605	4.75142	4.26711	5.63821	6.23682	6.05171	4.02952	3.92347	5.83423	5.32225	4.9013	4.10144	4.56007	blue	0.220409	-0.556355	-0.397234	-0.415451	-0.686548	0.520873	0.140123	-0.165689	0.111141	-0.0954852	0.269272	0.00258136	0.0401977	0.0311553	7.67392e-05	0.00534115	0.485742	0.408839	0.581022	0.635669
D-dichotoma_M_contig318.10972.1	OG0000626	7.36429	5.23588	6.79358	5.34342	6.7211	6.06659	6.91584	5.32171	6.39229	6.69222	4.40844	6.18557	6.68813	6.01786	6.23732	6.35276	6.28259	6.1579	6.50364	6.62287	6.14558	6.28234	6.01105	6.09635	6.08433	6.16384	6.41031	grey	-0.114401	0.0426271	0.114576	-0.0842845	-0.103684	-0.0991119	-0.120168	-0.125991	0.153847	-0.304354	0.569909	0.8328	0.569313	0.675964	0.606795	0.622829	0.550483	0.531188	0.443579	0.122705
D-dichotoma_M_contig320.11060.1	OG0009411	3.17858	6.11119	4.72082	8.78875	8.55919	8.99527	2.02518	4.91865	6.30033	6.08949	6.16643	7.2531	7.05464	6.40515	6.82952	7.79084	7.69335	6.73801	6.89473	7.27349	7.16405	6.40806	6.94416	6.53211	6.37896	7.201	6.98063	blue	0.143257	-0.756773	-0.427463	-0.654121	-0.374666	0.782337	0.409756	-0.109904	0.242897	0.15935	0.475938	4.92532e-06	0.0261463	0.000214858	0.0541664	1.42961e-06	0.0337857	0.585262	0.222165	0.427242
D-dichotoma_M_contig320.11065.1	OG0000627	10.2139	10.7304	10.8914	6.68411	7.39403	7.1546	10.5995	10.4956	10.7552	9.62295	10.0951	9.96291	6.0051	7.42774	6.90006	7.19181	7.58576	7.80185	7.43558	7.14937	8.1732	8.18762	6.95023	6.74421	7.24516	7.58148	7.34466	brown	0.173685	0.73058	0.110471	0.946533	0.710051	-0.815267	-0.607845	-0.158247	-0.709659	0.0239786	0.386271	1.51218e-05	0.583317	8.65969e-14	3.34426e-05	2.22895e-07	0.000770641	0.430489	3.39318e-05	0.905499
D-dichotoma_M_contig81.18938.1	OG0009412	2.67116	0	0	0	0	0	3.35209	0	0	3.01127	0	3.16609	6.58075	6.9709	6.82045	5.11296	4.67607	5.56317	5.41903	5.61784	5.42485	5.03138	6.1263	6.13851	6.07439	6.12872	4.78291	yellow	-0.739729	0.00864851	0.630511	-0.623804	-0.327931	0.28222	0.46134	0.481547	0.941277	0.0899058	1.03732e-05	0.96585	0.000422862	0.000507469	0.0949408	0.153796	0.0154285	0.0109845	2.7169e-13	0.655623
D-dichotoma_M_contig81.18939.1	OG0009413	1.88155	0	4.72082	0	0	0	0	2.5544	0	0	3.47482	7.09375	3.3983	4.0663	3.58999	3.64461	4.04876	2.52814	3.34382	3.40889	3.11526	3.51646	4.3116	3.90497	3.88197	4.08321	2.58273	turquoise	-0.613272	0.236892	0.575979	-0.221639	-0.00627294	0.0488319	0.333362	0.362842	0.530522	0.242233	0.000670242	0.234161	0.00166663	0.266542	0.975227	0.808877	0.0892753	0.0628662	0.0044166	0.22347
D-dichotoma_M_contig81.18941.1	OG0009414	0	0	0	0	0	0	0	0	0	0	0	0	0	0	0	0	0	0	0	0	0.853502	0	0	0	0	0.281597	0	NA	NA	NA	NA	NA	NA	NA	NA	NA	NA	NA	NA	NA	NA	NA	NA	NA	NA	NA	NA	NA
D-dichotoma_M_contig81.18946.1	OG0009415	4.09662	0	2.38634	7.67707	7.97613	7.70392	4.27966	4.35734	2.62933	8.25123	9.09637	9.04281	8.79462	9.03698	9.54984	10.148	10.1128	8.20159	9.65367	9.99462	9.10879	7.93623	9.05138	9.08018	8.27444	8.93427	8.43414	brown	-0.310872	-0.43529	0.0892109	-0.692907	-0.3933	0.795155	0.590894	0.175577	0.684615	0.509212	0.114497	0.0232493	0.658125	6.17601e-05	0.0424002	7.21662e-07	0.00117311	0.381037	8.18893e-05	0.00667245
D-dichotoma_M_contig82.19016.1	OG0000003	1.88155	0	2.38634	14.0615	13.419	13.0076	2.8361	3.42606	4.04982	4.87041	0	4.0834	0	1.03574	2.34941	1.18808	0.293208	0.880852	1.37396	0.922202	0	0	1.97858	1.48742	2.31031	2.22162	1.6329	turquoise	0.860523	-0.708351	-0.958973	-0.0536866	-0.324489	0.469916	0.0453158	-0.52962	-0.541078	-0.0548302	8.612e-09	3.56085e-05	3.38187e-15	0.790274	0.0986689	0.0133891	0.822414	0.00449683	0.00356442	0.785907
D-dichotoma_M_contig82.19024.1	OG0009416	3.17858	0	2.38634	8.28607	8.97327	7.82887	3.35209	2.5544	0	3.01127	0	0	2.52902	3.94857	1.47557	3.74628	2.27237	2.52814	2.99352	3.78176	2.89822	3.14285	2.95366	2.33877	2.16801	3.20014	2.8687	turquoise	0.568034	-0.85009	-0.79075	-0.449428	-0.486796	0.604044	0.0850094	-0.406397	-0.125859	-0.250066	0.00199606	1.99981e-08	9.17582e-07	0.0186806	0.0100238	0.000848504	0.673328	0.0354192	0.531623	0.208392
D-dichotoma_M_contig2226.7434.1	OG0009417	6.14573	6.49329	6.79358	0	0	0	7.08851	7.05099	7.33815	8.05448	8.89647	8.42615	4.18416	3.01589	3.25528	2.84997	1.23399	2.45623	2.47935	2.81584	0.488969	0.457315	5.7988	3.1525	3.03931	3.3295	2.45032	brown	-0.0156015	0.82707	0.35625	0.865342	0.477572	-0.63294	-0.157618	0.0474632	-0.427938	0.363722	0.938436	1.04532e-07	0.068166	5.70266e-09	0.0117623	0.000395407	0.432347	0.81414	0.0259625	0.0621842
D-dichotoma_M_contig2227.7439.1	OG0009418	6.08996	5.23588	5.9116	14.3523	12.8035	14.425	4.83965	6.21167	5.57551	2.17994	3.47482	0	5.01147	3.55633	4.35137	3.74628	5.22046	5.05555	5.77933	6.20834	5.1247	5.23083	5.39831	6.63061	5.33507	7.85163	7.3306	turquoise	0.712137	-0.816896	-0.827771	-0.362795	-0.408142	0.427741	-0.00771918	-0.333712	-0.273538	-0.434826	3.09468e-05	2.01417e-07	9.97569e-08	0.0629032	0.034563	0.0260389	0.969518	0.0889191	0.167406	0.0234135
D-dichotoma_M_contig2229.7449.1	OG0000006	0	0	0	5.53161	5.41954	4.31207	3.73137	0	0	0	0	0	2.26827	3.42142	2.07235	2.77496	1.97442	2.45623	2.06475	1.7913	1.38613	1.31727	2.98552	2.46197	3.33406	2.15336	2.14231	blue	0.31299	-0.838514	-0.563276	-0.66	-0.638461	0.751273	0.38842	-0.22265	0.214615	-0.149442	0.111919	4.74323e-08	0.00221902	0.000179892	0.000338755	6.30395e-06	0.0452647	0.264309	0.282378	0.456893
D-dichotoma_M_contig2231.7461.1	OG0000628	8.04495	8.03908	8.42414	0	0	0	7.69152	7.50261	7.29114	6.08949	5.94738	5.35334	6.2866	2.7034	8.3113	5.04275	0	5.11514	7.94333	7.24398	5.60306	5.57359	4.20737	2.40169	2.66846	2.2868	3.76639	blue	-0.344994	0.777795	0.544833	0.565696	0.306705	-0.731555	-0.58009	0.211209	-0.143517	-0.0919367	0.078005	1.80189e-06	0.00329725	0.00210308	0.119696	1.45365e-05	0.00151541	0.290269	0.475129	0.648332
D-dichotoma_M_contig252.8676.1	OG0009419	5.5435	2.64168	2.38634	0	0	0	4.67601	3.96558	0	5.93152	3.47482	0	5.15363	6.9889	5.57473	5.06654	5.75382	4.66689	5.85071	5.08285	4.43132	4.56998	7.06278	6.60075	6.32968	5.22598	4.63824	turquoise	-0.707822	0.309043	0.731825	-0.298298	-0.156294	-0.0537754	0.337777	0.492719	0.74773	0.0454401	3.63076e-05	0.116758	1.43782e-05	0.130711	0.436274	0.789935	0.0848614	0.00902513	7.36572e-06	0.821935
D-dichotoma_M_contig252.8678.1	OG0000629	8.01532	8.37137	7.0907	0	0	0	7.73376	6.21167	7.66753	7.75764	7.8686	7.00694	6.06802	6.43172	5.8399	6.07643	5.60812	5.79219	5.61333	5.79689	6.22554	5.82208	6.35084	6.11054	6.03905	5.88216	5.47907	blue	-0.591551	0.95851	0.852054	0.535098	0.534246	-0.72155	-0.167469	0.383774	0.120499	0.178222	0.00115464	3.88178e-15	1.71486e-08	0.00402798	0.00409808	2.16227e-05	0.403753	0.0481319	0.549379	0.373789
D-dichotoma_M_contig252.8679.1	OG0009420	5.84245	4.76569	5.80653	0	0	4.31207	5.35458	2.5544	5.22156	5.31632	3.47482	5.61048	3.84409	4.21647	3.43232	4.26786	3.53506	4.1333	3.60201	3.85051	3.99343	3.51646	4.58553	4.70204	4.07378	3.68422	3.82104	turquoise	-0.341991	0.701521	0.596142	0.444624	0.388386	-0.556644	-0.12182	0.447618	0.0250624	0.0819862	0.0808045	4.56176e-05	0.00103256	0.0201421	0.0452853	0.00256528	0.544977	0.0192209	0.901248	0.684346
D-dichotoma_M_contig253.8711.1	OG0009421	1.88155	0	0	0	0	0	4.4914	2.5544	3.50777	5.18244	3.47482	3.16609	0	1.50476	0	0.791248	0	0	0.996303	0.922202	0	0	0	2.40169	0.302097	0.896975	1.0361	NA	NA	NA	NA	NA	NA	NA	NA	NA	NA	NA	NA	NA	NA	NA	NA	NA	NA	NA	NA	NA
D-dichotoma_M_contig254.8732.1	OG0009422	2.67116	0	0	0	0	0	2.02518	0	0	2.17994	0	0	0	0.608885	0	0	0	0.642448	0	0.533566	0	0.804027	0.899188	0.537017	0	0.517103	1.0361	NA	NA	NA	NA	NA	NA	NA	NA	NA	NA	NA	NA	NA	NA	NA	NA	NA	NA	NA	NA	NA
D-dichotoma_M_contig254.8737.1	OG0009423	9.67446	9.6583	9.17005	11.5774	9.47492	11.1269	8.98761	8.71488	8.58822	9.00295	8.69987	8.45922	8.64873	8.4595	8.43672	7.87406	7.79786	8.27004	8.3055	8.25937	8.86969	8.47304	8.362	8.30688	8.70075	7.98403	8.04832	turquoise	0.765263	-0.467853	-0.816062	0.164753	-0.195264	0.119298	-0.231182	-0.230325	-0.672069	-0.244396	3.32227e-06	0.013858	2.12168e-07	0.41153	0.329041	0.553394	0.245961	0.247766	0.000123409	0.219235
D-dichotoma_M_contig1118.995.1	OG0009424	0	2.64168	2.38634	0	0	0	4.4914	4.35734	2.62933	3.53532	0	0	4.52044	5.26841	4.8824	4.42331	2.95621	4.51589	5.35033	4.92179	2.07981	3.65105	4.77976	5.15885	4.9013	4.56265	3.76639	NA	NA	NA	NA	NA	NA	NA	NA	NA	NA	NA	NA	NA	NA	NA	NA	NA	NA	NA	NA	NA
D-dichotoma_M_contig1118.999.1	OG0009425	7.41055	7.8554	7.4805	4.16764	5.41954	0	7.99913	7.10307	7.33815	8.4391	7.66789	7.9557	6.04213	4.93862	4.42498	5.17262	5.78364	3.98785	3.57818	2.72111	3.41719	3.85074	7.54939	6.21057	6.08927	6.66143	6.5176	blue	-0.0220897	0.701724	0.333814	0.679354	0.520427	-0.561554	0.0896506	-0.146462	-0.280286	0.250765	0.912914	4.52883e-05	0.0888155	9.74878e-05	0.00538758	0.00230481	0.656542	0.466019	0.156758	0.207081
D-dichotoma_M_contig1119.1004.1	OG0009426	0	0	0	0	0	0	0	0	0	0	0	0	0	0	0	0.242014	0	0	0	0.29131	0	0	0	0	0	0.281597	0.609128	NA	NA	NA	NA	NA	NA	NA	NA	NA	NA	NA	NA	NA	NA	NA	NA	NA	NA	NA	NA	NA
D-dichotoma_M_contig1119.1013.1	OG0000630	5.84245	4.06365	0	12.7387	11.4303	12.4202	5.64751	3.42606	4.04982	5.31632	5.68902	6.18557	7.85325	8.85672	8.63394	9.00831	7.77578	8.38223	8.33869	7.46288	6.46837	7.30061	7.24659	8.69615	7.94688	7.99138	6.85532	black	0.25669	-0.878939	-0.541117	-0.718877	-0.639219	0.889885	0.43384	-0.114251	0.278514	0.0626672	0.196195	1.62749e-09	0.00356156	2.39743e-05	0.000331566	5.29255e-10	0.0237654	0.570417	0.159505	0.756161
D-dichotoma_M_contig1120.1037.1	OG0000631	7.29198	7.78858	7.54724	7.79201	7.39403	7.76775	7.62576	7.24889	7.42781	8.25123	9.24811	8.95279	7.47214	8.33483	7.79567	8.58428	7.99042	8.13405	7.95147	8.04877	7.85403	7.45579	7.99418	7.83472	7.51692	7.77845	7.6389	grey	-0.152366	0.134982	0.150107	0.0985267	0.158464	0.319015	0.266436	0.166007	0.0925707	0.805297	0.448032	0.502042	0.45487	0.624893	0.429849	0.104822	0.179153	0.407928	0.646062	4.05819e-07
D-dichotoma_M_contig1121.1043.1	OG0000004	0	0	0	0	0	0	0	0	0	0	0	0	0	0.336329	0	0	0	0	0	0	0	0	0	0.537017	0.551757	0.281597	0.336476	NA	NA	NA	NA	NA	NA	NA	NA	NA	NA	NA	NA	NA	NA	NA	NA	NA	NA	NA	NA	NA
D-dichotoma_M_contig1121.1044.1	OG0009427	0	0	0	0	0	0	0	0	0	0	0	0	0	0	0	0	0	0	0	0	0	0	0	0	0	0	0	NA	NA	NA	NA	NA	NA	NA	NA	NA	NA	NA	NA	NA	NA	NA	NA	NA	NA	NA	NA	NA
D-dichotoma_M_contig3445.11705.1	OG0009428	0	0	0	0	0	0	0	0	0	0	0	0	0.308699	0.608885	0.439558	0	0	0.356693	0	0	0	0	0	0.537017	0.302097	0	0	NA	NA	NA	NA	NA	NA	NA	NA	NA	NA	NA	NA	NA	NA	NA	NA	NA	NA	NA	NA	NA
D-dichotoma_M_contig3446.11707.1	OG0009429	0	0	0	0	0	0	2.8361	0	0	0	0	0	1.85778	2.22514	1.27784	2.16034	0.745095	2.30066	2.31601	1.96671	0.488969	1.31727	1.62107	2.8254	1.73524	1.65782	0.838351	NA	NA	NA	NA	NA	NA	NA	NA	NA	NA	NA	NA	NA	NA	NA	NA	NA	NA	NA	NA	NA
D-dichotoma_M_contig3449.11712.1	OG0000632	7.84047	7.82238	7.33696	2.73491	0	3.38293	7.24271	7.68453	8.28653	9.39979	9.17424	9.48954	9.20302	8.73933	9.07325	9.29675	8.85062	9.12134	8.44135	8.6661	9.15648	9.1353	8.60764	8.83012	8.81783	8.69415	9.09909	turquoise	-0.79991	0.699707	0.947848	0.0872862	0.338968	-0.359254	0.110086	0.689082	0.541326	0.291221	5.53196e-07	4.86653e-05	6.38932e-14	0.665074	0.0836994	0.0657102	0.584639	7.04223e-05	0.0035462	0.140539
D-dichotoma_M_contig3450.11738.1	OG0009430	3.55322	2.64168	4.16295	4.16764	5.99322	0	4.4914	0	4.44292	3.9189	4.97057	4.0834	0	1.50476	1.38009	0.630339	0	0	3.42624	2.6713	2.21131	0.804027	3.0167	2.20406	1.51777	1.75315	3.23349	grey	0.492262	0.128283	-0.307768	0.485809	0.198023	-0.0803402	-0.171292	-0.537904	-0.521688	0.278927	0.00909911	0.523681	0.118354	0.0101989	0.322115	0.690371	0.392948	0.00380447	0.00525716	0.158862
D-dichotoma_M_contig3450.11739.1	OG0009431	0	2.64168	2.38634	0	0	0	5.11997	0	0	4.68479	5.68902	3.16609	0	1.20958	1.27784	1.4026	0	0.356693	3.02913	2.61971	1.14426	0.804027	2.36515	2.40169	0	1.75315	3.10725	grey	0.0279551	0.462074	0.263256	0.440998	0.369463	-0.110296	0.0180633	0.0797687	-0.0889485	0.627604	0.889915	0.0152445	0.184597	0.021306	0.0578707	0.583918	0.928744	0.692468	0.659071	0.000457886
D-dichotoma_M_contig3455.11743.1	OG0000155	11.1635	10.8903	10.7986	0	0	0	10.0292	11.5454	10.7767	9.7046	8.86551	10.0414	7.37595	9.24916	10.651	8.6644	8.71561	6.09417	8.39179	7.88227	4.98466	4.67903	5.33788	7.36963	6.95949	5.99372	5.46197	blue	-0.453638	0.92408	0.708429	0.619627	0.430915	-0.74618	-0.221577	0.292722	-0.0510661	0.0608568	0.0174724	6.12952e-12	3.55064e-05	0.000567344	0.0248345	7.87835e-06	0.266679	0.138411	0.800302	0.763004
D-dichotoma_M_contig1322.2487.1	OG0009432	0	0	2.38634	0	0	0	2.8361	4.35734	2.62933	3.01127	0	0	0	1.03574	0.439558	0	0.927098	0.642448	0.261803	0.740931	0	0	1.53756	2.33877	1.11415	0	0.838351	NA	NA	NA	NA	NA	NA	NA	NA	NA	NA	NA	NA	NA	NA	NA	NA	NA	NA	NA	NA	NA
D-dichotoma_M_contig1323.2492.1	OG0009433	0	0	0	5.84729	0	0	2.02518	0	0	2.17994	0	0	2.46812	3.76574	3.14342	3.94755	4.4116	3.39733	3.67125	4.2573	1.14426	3.0806	3.44111	3.56356	3.30035	4.08321	3.89931	yellow	-0.311365	-0.348229	0.203637	-0.696037	-0.390646	0.532599	0.483014	0.455243	0.737707	0.0273683	0.113893	0.0750722	0.308306	5.53882e-05	0.0439397	0.00423646	0.0107087	0.0170292	1.1289e-05	0.892212
D-dichotoma_M_contig1323.2495.1	OG0009434	0	0	0	0	0	0	0	0	0	0	0	0	0	0	0	0	0	0	0.483315	0.29131	0	0	0	0	0	0	0	NA	NA	NA	NA	NA	NA	NA	NA	NA	NA	NA	NA	NA	NA	NA	NA	NA	NA	NA	NA	NA
D-dichotoma_M_contig1324.2497.1	OG0000633	6.72388	7.44244	6.79358	7.31652	6.98185	7.82887	7.58019	7.38132	7.70388	8.05448	8.76843	8.64315	9.76161	9.25846	9.09362	8.99701	8.82504	8.74962	8.67561	8.79959	8.54136	8.51041	9.02383	9.29583	8.75776	8.90991	8.60932	turquoise	-0.649744	-0.0425766	0.534945	-0.572533	-0.254768	0.444244	0.602449	0.500259	0.844074	0.414257	0.000244638	0.832995	0.00404052	0.00180327	0.199682	0.0202616	0.000883175	0.00787546	3.15995e-08	0.0316926
D-dichotoma_M_contig1325.2503.1	OG0009435	3.17858	3.52119	3.77451	0	0	0	4.67601	2.5544	0	2.17994	3.47482	0	1.54039	0	0.776001	1.06754	0	0.356693	2.71619	3.0676	0	0	2.31588	2.57547	3.07962	1.55574	2.30452	NA	NA	NA	NA	NA	NA	NA	NA	NA	NA	NA	NA	NA	NA	NA	NA	NA	NA	NA	NA	NA
D-dichotoma_M_contig1.8.1	OG0009436	6.72388	6.92521	6.00954	11.4519	11.6527	11.8002	6.76108	7.50261	7.29114	7.93466	8.76843	8.3923	8.50644	7.25996	8.50409	8.53328	8.59468	7.68479	7.89229	8.07055	7.35035	7.33435	8.04704	7.75714	7.92354	8.27048	7.32825	turquoise	0.596001	-0.859619	-0.838192	-0.384391	-0.457242	0.788047	0.294646	-0.406224	-0.197028	0.154398	0.00103612	9.28904e-09	4.85374e-08	0.0477429	0.0164899	1.06038e-06	0.135718	0.0355051	0.324603	0.441929
D-dichotoma_M_contig1.19.1	OG0000634	10.8349	10.3275	10.885	12.8915	11.5458	12.9066	9.24287	10.3737	9.38839	9.03243	9.36341	9.20758	10.8508	9.96004	10.8047	9.63803	9.84588	10.6429	10.959	10.8603	9.89896	10.0431	10.5348	10.6884	10.8526	9.82653	9.43041	turquoise	0.455192	-0.74413	-0.67662	-0.403763	-0.717919	0.412093	-0.0377431	-0.129725	-0.162585	-0.483431	0.017043	8.60559e-06	0.000106589	0.0367437	2.48706e-05	0.0326856	0.851735	0.518987	0.417795	0.0106313
D-dichotoma_M_contig1.21.1	OG0009437	0	0	0	0	0	0	0	0	0	0	0	0	5.49631	5.75577	5.37251	4.79953	4.77438	4.53347	4.98378	5.79689	3.95642	4.50036	4.70517	5.65481	5.70724	4.85898	4.90176	yellow	-0.714983	-0.152316	0.550888	-0.788726	-0.404889	0.359582	0.468479	0.464487	0.98374	-0.0517558	2.78083e-05	0.448182	0.00290242	1.02273e-06	0.0361726	0.0654461	0.0137143	0.0146522	3.65385e-20	0.79766
D-dichotoma_M_contig1.27.1	OG0000635	7.49885	8.09545	7.70174	12.383	12.1205	12.3748	6.71966	8.17283	7.47063	8.98295	9.78343	9.73884	8.67002	8.74816	9.19573	9.49271	8.62464	8.4393	9.39562	9.82988	8.04684	7.01881	9.37981	8.96838	7.60759	8.73632	7.72918	turquoise	0.585941	-0.773342	-0.786922	-0.309327	-0.500424	0.760437	0.249922	-0.362324	-0.222014	0.208906	0.00132065	2.24928e-06	1.12548e-06	0.116405	0.00785166	4.16378e-06	0.208663	0.0632706	0.265712	0.295682
D-dichotoma_M_contig888.19650.1	OG0009438	1.88155	2.64168	0	5.34342	6.98185	3.38293	0	2.5544	0	0	0	0	0	0	0	0	0	0	0	0	0	0	0	0.293353	0	0	0	turquoise	0.751412	-0.607872	-0.890021	-0.0152744	-0.274576	0.252238	-0.134437	-0.686557	-0.572446	-0.2992	6.26509e-06	0.000770104	5.2157e-10	0.939724	0.165736	0.204338	0.503785	7.6714e-05	0.00180682	0.129494
D-dichotoma_M_contig890.19670.1	OG0000636	6.25119	7.52685	6.94978	7.41545	5.41954	7.05579	8.26699	8.01867	8.99256	10.731	11.2642	10.8668	9.17292	9.07329	8.85868	9.55113	9.10087	9.10012	8.95724	9.23789	9.39475	9.43492	9.37906	8.84647	8.69994	9.46579	9.78118	turquoise	-0.485497	0.363692	0.578743	0.00475731	0.311554	0.120936	0.32547	0.49296	0.436857	0.771457	0.0102547	0.0622072	0.0015636	0.981212	0.113662	0.54792	0.0975953	0.00898631	0.0227022	2.46711e-06
D-dichotoma_M_contig890.19671.1	OG0000156	4.79946	5.01986	3.77451	3.62227	0	0	3.35209	3.96558	5.22156	4.47172	5.37406	5.04021	6.56266	7.09522	6.7601	6.51713	6.56606	6.40234	7.06733	7.14937	5.7509	6.64694	6.24951	6.77721	6.38702	6.36587	5.77042	turquoise	-0.845944	0.392329	0.8536	-0.285736	-0.00901804	-0.0786245	0.223958	0.657986	0.77414	0.123637	2.74671e-08	0.0429584	1.51714e-08	0.148516	0.964392	0.696672	0.26144	0.000191254	2.16249e-06	0.538951
D-dichotoma_M_contig891.19677.1	OG0009439	0	0	2.38634	9.20297	8.29692	8.70046	0	0	2.62933	2.17994	0	0	0	0.838041	0.776001	0	0	0	0.844711	0.922202	0.853502	0	0.230207	1.97501	0	1.55574	4.04417	turquoise	0.83701	-0.788574	-0.915861	-0.21741	-0.30021	0.516469	0.0905459	-0.450369	-0.40212	-0.125678	5.28038e-08	1.03106e-06	2.11723e-11	0.276007	0.128143	0.00581475	0.653322	0.0184049	0.0375896	0.532218
D-dichotoma_M_contig545.16082.1	OG0009440	0	0	0	0	0	0	0	0	0	0	0	0	0	0.336329	0	0	0	0	0	0	0	0	0	0	0	0	0	NA	NA	NA	NA	NA	NA	NA	NA	NA	NA	NA	NA	NA	NA	NA	NA	NA	NA	NA	NA	NA
D-dichotoma_M_contig546.16088.1	OG0009441	4.09662	3.52119	3.77451	8.1775	9.24579	7.24708	3.35209	4.35734	4.44292	4.22163	3.47482	3.16609	1.28187	1.63242	2.39897	1.83066	0	2.03046	2.99352	2.19535	1.93512	1.51849	1.70001	3.29189	2.16801	3.23359	5.20889	green	0.943812	-0.509468	-0.889422	0.152224	-0.12378	0.222554	-0.108507	-0.623067	-0.673886	-0.0921336	1.58675e-13	0.00664052	5.56346e-10	0.44846	0.538478	0.26452	0.590069	0.00051762	0.000116434	0.647627
D-dichotoma_M_contig546.16089.1	OG0009442	3.55322	3.52119	2.38634	7.55218	7.85112	7.05579	3.73137	3.42606	0	3.9189	3.47482	3.16609	2.19499	2.64404	2.58175	1.4026	1.59849	1.69773	3.88062	2.04702	1.14426	1.69506	2.09999	2.20406	1.51777	1.32698	4.21714	turquoise	0.835153	-0.592567	-0.874369	0.0263958	-0.286987	0.396663	-0.0085015	-0.528956	-0.54151	0.00459828	6.01932e-08	0.00112659	2.52059e-09	0.896021	0.146668	0.0405116	0.966431	0.00455664	0.00353278	0.981839
D-dichotoma_M_contig546.16090.1	OG0009443	1.88155	0	0	7.55218	7.85112	6.83521	0	0	0	0	0	0	0	0	0	0	0.745095	0	0	0	0	0	0	0	0	0	0	turquoise	0.782861	-0.810355	-0.971405	-0.201541	-0.378971	0.517078	0.00939632	-0.54832	-0.457377	-0.181364	1.39143e-06	3.00747e-07	3.96903e-17	0.313417	0.0512443	0.00574726	0.9629	0.00306458	0.016454	0.365283
D-dichotoma_M_contig547.16106.1	OG0009444	2.67116	0	3.77451	8.65342	5.99322	7.05579	6.39063	2.5544	5.0056	3.53532	3.47482	0	3.58197	3.9729	3.02215	3.2329	2.77808	2.84212	2.99352	3.21394	2.07981	2.45307	3.87453	3.22388	2.50047	3.16591	2.37926	turquoise	0.62264	-0.603581	-0.705694	-0.154954	-0.360227	0.439327	0.0493922	-0.224396	-0.287324	-0.105428	0.000523575	0.000858434	3.92425e-05	0.440267	0.0649296	0.0218607	0.806724	0.260484	0.146174	0.600724
D-dichotoma_M_contig547.16107.1	OG0009445	0	3.52119	3.24132	10.5234	9.03205	8.41172	6.16229	5.13421	5.22156	4.68479	3.47482	4.0834	3.33148	3.94857	3.02215	3.31462	3.81465	3.05184	3.39929	3.60734	1.14426	2.3513	3.8048	3.11545	3.1942	3.44822	3.23349	turquoise	0.776646	-0.62456	-0.859203	-0.0298051	-0.272235	0.470526	0.0722361	-0.454412	-0.481404	0.0322563	1.90893e-06	0.00049725	9.61578e-09	0.882678	0.16952	0.013253	0.720301	0.0172575	0.0110117	0.873103
D-dichotoma_M_contig2315.7841.1	OG0009446	4.09662	5.73892	5.28743	0	0	0	3.35209	4.91865	5.40936	0	3.47482	3.16609	4.08624	6.75644	6.32005	7.83766	7.47865	5.26998	6.65374	6.404	5.87509	5.04774	5.65266	6.13389	5.49264	6.15077	4.04417	turquoise	-0.804306	0.416238	0.798378	-0.233233	0.0879038	-0.28358	0.0327039	0.500351	0.633816	-0.229093	4.29937e-07	0.030805	6.03132e-07	0.241678	0.662841	0.151738	0.871356	0.00786213	0.000385903	0.250375
D-dichotoma_M_contig2316.7844.1	OG0009447	6.89636	4.06365	5.80653	0	0	0	7.98171	4.91865	4.44292	6.23186	4.40844	5.82865	0	0	0	0	0	0.356693	0	0	0	0.457315	0.230207	0	0	0	0	brown	0.236792	0.706694	0.074959	0.965112	0.576652	-0.713567	-0.464789	-0.134375	-0.701575	0.137448	0.234365	3.7838e-05	0.710197	4.60919e-16	0.001641	2.93327e-05	0.0145795	0.503985	4.55298e-05	0.494189
D-dichotoma_M_contig2317.7851.1	OG0009448	0	0	0	0	0	0	0	2.5544	0	2.17994	0	0	0.778857	3.76574	2.39897	0.630339	0.536773	2.89748	4.01098	4.24032	2.33182	2.45307	2.36515	3.1525	2.95515	0.896975	1.20998	NA	NA	NA	NA	NA	NA	NA	NA	NA	NA	NA	NA	NA	NA	NA	NA	NA	NA	NA	NA	NA
D-dichotoma_M_contig2318.7855.1	OG0009449	7.60214	7.71852	7.73074	14.9143	13.4436	14.4132	8.57642	8.01867	8.23778	9.00295	9.42841	9.4072	9.48248	9.36455	9.8035	9.81256	9.34789	9.30848	9.44382	9.76421	9.33652	9.14579	9.42915	9.3895	9.09601	9.33852	9.81607	blue	0.630353	-0.935631	-0.861844	-0.469387	-0.488893	0.812217	0.254734	-0.315456	-0.146674	0.0560156	0.000424698	8.29921e-13	7.70382e-09	0.0135081	0.00966018	2.68733e-07	0.199745	0.108973	0.465368	0.781388
D-dichotoma_M_contig3997.13098.1	OG0009450	0	0	0	0	0	0	0	0	0	0	0	0	0	0	0	0	0	0	0	0	0	0	0	0	0	0	0	NA	NA	NA	NA	NA	NA	NA	NA	NA	NA	NA	NA	NA	NA	NA	NA	NA	NA	NA	NA	NA
D-dichotoma_M_contig4000.13175.1	OG0009451	5.27	3.52119	3.24132	0	0	0	5.81423	0	2.62933	4.47172	3.47482	0	1.41691	1.03574	1.27784	0	0.536773	2.03046	1.76031	1.22805	3.04648	3.0806	0.230207	2.68069	1.2616	0.896975	1.20998	blue	-0.0857037	0.599172	0.305043	0.559931	0.40858	-0.599875	-0.455959	0.0708333	-0.233644	-0.0130543	0.670807	0.000958251	0.121818	0.00238828	0.0343506	0.000941689	0.0168342	0.725524	0.240826	0.948473
D-dichotoma_M_contig4005.13182.1	OG0009452	3.17858	0	2.38634	12.4311	11.7434	12.3253	2.8361	4.66512	4.44292	4.22163	5.68902	0	5.37714	4.33381	5.43324	5.83469	5.67964	4.888	5.55957	6.0022	3.62016	4.24056	4.52177	4.94317	3.66069	5.57157	4.87618	blue	0.565008	-0.887628	-0.786389	-0.492866	-0.515404	0.726748	0.191541	-0.314343	-0.0941192	-0.068665	0.00213551	6.735e-10	1.15757e-06	0.00900146	0.00593443	1.76292e-05	0.338527	0.110295	0.640532	0.733621
D-dichotoma_M_contig4016.13202.1	OG0009453	6.25119	7.48526	6.18747	0	0	0	7.27166	5.48762	6.91062	7.55583	7.66789	6.70997	8.09524	8.22011	7.67136	7.8819	7.56187	7.39619	8.00273	7.98522	7.32516	7.01465	8.02612	8.3079	8.09558	7.8381	7.14226	turquoise	-0.835447	0.718332	0.976984	0.0593147	0.248483	-0.37154	0.124922	0.546222	0.593106	0.211334	5.89649e-08	2.44808e-05	2.71276e-18	0.768847	0.211382	0.0563687	0.534705	0.00320283	0.00111196	0.289978
D-dichotoma_M_contig4020.13224.1	OG0009454	4.49042	3.52119	2.38634	0	0	0	4.03141	3.42606	4.44292	6.29811	4.97057	0	0	1.36471	0.439558	0.242014	0	1.2645	1.58003	2.04702	0.488969	1.31727	1.44892	3.44908	2.91115	1.44589	1.95953	blue	0.0713048	0.664554	0.270627	0.700336	0.387751	-0.588869	-0.241768	0.0336753	-0.339184	0.189391	0.723767	0.000156354	0.172153	4.75891e-05	0.0456688	0.0012316	0.224388	0.867568	0.08349	0.344078
D-dichotoma_M_contig1689.4698.1	OG0009455	3.17858	4.45696	5.5702	0	0	0	3.35209	5.13421	5.22156	5.65647	4.97057	5.82865	4.8418	4.35247	5.44508	5.43873	5.78953	5.38096	5.23311	5.69465	5.237	3.77415	4.72418	4.12601	3.78779	4.53609	5.55358	turquoise	-0.733984	0.736635	0.886654	0.1808	0.38848	-0.421228	-0.0138926	0.468776	0.412435	0.257159	1.31664e-05	1.18034e-05	7.46159e-10	0.366802	0.0452287	0.0286577	0.945168	0.0136465	0.0325272	0.195349
D-dichotoma_M_contig1689.4700.1	OG0000637	9.59154	9.22503	9.76824	2.73491	0	6.06659	9.30021	8.91752	9.6714	9.59687	10.2825	9.91604	9.65933	9.19655	9.78031	10.1777	9.70963	9.58521	9.71131	9.9256	9.95163	9.44808	9.24233	9.32401	8.81857	9.53029	10.408	turquoise	-0.694185	0.751953	0.908955	0.203618	0.419275	-0.486594	-0.031147	0.718902	0.401489	0.180782	5.90832e-05	6.1166e-06	5.46252e-11	0.30835	0.0294831	0.0100595	0.877434	2.39517e-05	0.0379186	0.366851
D-dichotoma_M_contig1691.4717.1	OG0009456	0	0	3.77451	0	0	0	0	5.13421	4.04982	0	3.47482	0	6.08839	6.19374	4.59409	5.87117	5.36946	5.56317	4.52897	4.24032	5.36961	5.81254	6.81932	5.77256	6.32968	6.22332	6.3372	turquoise	-0.716556	0.0658703	0.634552	-0.559358	-0.122926	0.0725969	0.358033	0.468403	0.815437	-0.0755045	2.61981e-05	0.744098	0.000378074	0.00241839	0.541304	0.718959	0.0666997	0.0137316	2.20561e-07	0.708179
D-dichotoma_M_contig1691.4718.1	OG0009457	11.6432	11.8536	11.5297	0	0	0	11.4862	10.9932	11.1305	10.3092	10.3173	9.79173	1.28187	1.20958	5.2961	4.36056	1.79866	3.19127	5.38509	5.43593	3.52224	5.44361	0.603131	0	0	0	0	blue	0.0202551	0.791713	0.229362	0.918037	0.592653	-0.793197	-0.659089	-0.041638	-0.60727	0.0572882	0.920123	8.71107e-07	0.249802	1.54427e-11	0.00112424	8.03559e-07	0.000184953	0.836628	0.000782007	0.776544
D-dichotoma_M_contig1694.4725.1	OG0009458	0	0	0	0	4.45286	0	0	0	0	0	0	0	0	0	1.04863	0	0	0	0	0	0	0	0.230207	0.537017	0.302097	0.281597	0	NA	NA	NA	NA	NA	NA	NA	NA	NA	NA	NA	NA	NA	NA	NA	NA	NA	NA	NA	NA	NA
D-dichotoma_M_contig1694.4728.1	OG0009459	1.88155	0	0	0	0	0	2.8361	0	0	0	0	0	3.71898	1.95901	2.85465	3.2046	3.29118	2.12626	1.67299	1.35967	0.853502	2.24179	1.02717	3.07741	2.55867	2.15336	0.609128	NA	NA	NA	NA	NA	NA	NA	NA	NA	NA	NA	NA	NA	NA	NA	NA	NA	NA	NA	NA	NA
D-dichotoma_M_contig1695.4738.1	OG0009460	5.77332	5.99745	5.80653	0	0	4.31207	4.27966	6.38995	6.56031	5.55175	6.52453	6.18557	0.966698	0	4.14901	2.37873	0	0.880852	4.32925	3.80504	1.59321	1.85235	2.98552	0	0.302097	0.281597	0.838351	brown	0.176874	0.620939	0.0798064	0.838973	0.433411	-0.613866	-0.541574	0.00486349	-0.64353	0.142418	0.377473	0.000547912	0.692329	4.58945e-08	0.0239198	0.000659978	0.00352808	0.980792	0.000293144	0.478552
D-dichotoma_M_contig898.19725.1	OG0009461	5.05383	4.76569	4.93537	2.73491	0	0	5.73328	4.35734	4.44292	4.87041	3.47482	4.0834	6.11843	6.63594	6.95493	6.92967	6.64615	5.52852	6.70966	6.10895	5.15769	4.85668	6.33238	6.16142	5.54397	6.20657	5.32688	turquoise	-0.808355	0.508583	0.88918	-0.163897	0.0460093	-0.232184	0.194434	0.643331	0.70867	-0.00952417	3.38927e-07	0.00675163	5.70963e-10	0.413996	0.81974	0.243862	0.33114	0.000294822	3.51922e-05	0.962395
D-dichotoma_M_contig899.19738.1	OG0009462	0	0	0	0	0	0	0	0	0	0	0	0	0	0	0	0	0	0.356693	0	0	0	0.457315	0	0	0	0	0	NA	NA	NA	NA	NA	NA	NA	NA	NA	NA	NA	NA	NA	NA	NA	NA	NA	NA	NA	NA	NA
D-dichotoma_M_contig901.19782.1	OG0009463	0	0	0	0	0	0	0	0	0	3.01127	0	0	0	0	0	0	1.88922	0	0	0	0	0	0	0.537017	0	0	0.609128	NA	NA	NA	NA	NA	NA	NA	NA	NA	NA	NA	NA	NA	NA	NA	NA	NA	NA	NA	NA	NA
D-dichotoma_M_contig2603.8990.1	OG0000638	8.80304	9.16043	9.1161	3.62227	0	6.25655	8.40406	8.87322	8.94779	9.45164	10.0951	10.0845	11.8578	10.5047	10.5011	10.8032	10.8147	10.6645	10.5038	10.7214	11.2195	10.983	10.8711	10.7154	10.8389	10.8776	10.9804	turquoise	-0.817242	0.558552	0.923099	-0.0910949	0.218812	-0.271009	0.158484	0.784801	0.647874	0.168981	1.97104e-07	0.00246123	7.15804e-12	0.651351	0.272844	0.171525	0.429791	1.25805e-06	0.000258433	0.399459
D-dichotoma_M_contig2603.8991.1	OG0009464	2.67116	0	3.77451	0	0	0	2.02518	3.42606	3.50777	5.03484	6.16643	5.61048	4.00281	4.63756	4.13445	4.84608	4.95294	4.65088	4.0805	4.65336	4.06473	4.02612	4.5751	4.18085	3.88197	4.48145	3.97356	turquoise	-0.7067	0.49525	0.765613	-0.0246748	0.206883	-0.0416066	0.267143	0.443266	0.548727	0.553201	3.78289e-05	0.00862441	3.26768e-06	0.902768	0.30049	0.83675	0.177959	0.020572	0.00303841	0.00276263
D-dichotoma_M_contig30.10414.1	OG0009465	0	0	0	0	0	0	4.67601	0	2.62933	0	3.47482	3.16609	5.79178	5.34496	4.92531	5.37031	4.50047	4.34722	5.08874	5.29504	3.18092	3.46866	5.6175	5.75459	4.75962	4.78195	4.33448	turquoise	-0.677164	0.0653366	0.620294	-0.523884	-0.233334	0.302505	0.459708	0.462506	0.857157	0.233103	0.000104722	0.746104	0.000557396	0.00503654	0.241469	0.12511	0.0158444	0.015137	1.13836e-08	0.241949
D-dichotoma_M_contig31.10718.1	OG0000639	5.62424	6.11119	5.28743	0	0	0	5.81423	6.47145	6.84703	7.15233	6.81119	7.32663	7.66085	8.07456	7.56412	8.50236	8.49817	8.03724	8.01388	8.23708	7.90105	8.18947	8.36882	8.22553	8.04812	8.50938	8.67384	turquoise	-0.863983	0.606214	0.967425	-0.0925695	0.244293	-0.266994	0.184509	0.567085	0.700991	0.21372	6.41572e-09	0.000803242	1.98034e-16	0.646067	0.219436	0.178211	0.356886	0.00203895	4.64909e-05	0.284438
D-dichotoma_M_contig31.10719.1	OG0009466	3.55322	0	2.38634	0	0	0	4.83965	3.96558	5.40936	5.03484	5.94738	6.59564	6.41316	5.70585	6.49546	7.11215	6.77939	5.977	6.09284	6.41539	5.61499	5.63984	6.45124	6.19733	5.5583	6.42858	6.4628	turquoise	-0.761795	0.401801	0.809871	-0.213879	0.108956	0.0293318	0.329711	0.509728	0.732344	0.416229	3.90965e-06	0.0377554	3.09619e-07	0.284071	0.588525	0.884528	0.093055	0.00660819	1.4078e-05	0.030809
D-dichotoma_M_contig31.10721.1	OG0009467	4.30692	0	2.38634	0	0	0	4.03141	4.66512	4.44292	3.01127	0	5.04021	5.63437	4.15401	5.71829	5.48653	5.75983	5.04333	5.19443	5.10177	4.13267	3.92347	5.6427	5.26418	4.8556	4.71249	4.76908	turquoise	-0.733382	0.338618	0.756317	-0.275502	-0.0724565	-0.10155	0.222093	0.493574	0.711943	-0.00896833	1.3495e-05	0.0840396	5.02834e-06	0.164255	0.719481	0.614257	0.265538	0.00888801	3.11721e-05	0.964588
D-dichotoma_M_contig736.18213.1	OG0000640	7.93845	7.6066	8.31344	4.16764	0	4.31207	7.75442	7.64993	8.66398	8.98295	9.81618	9.85522	9.38701	8.80939	9.69516	9.87478	9.42606	9.06428	9.22047	9.46132	8.91018	8.86799	9.445	9.22746	8.88689	9.36941	8.9423	turquoise	-0.765835	0.657008	0.920333	0.0610121	0.286625	-0.29918	0.142618	0.758276	0.543806	0.298665	3.2335e-06	0.000197005	1.09643e-11	0.762417	0.147201	0.129522	0.477929	4.59895e-06	0.00336851	0.130214
D-dichotoma_M_contig737.18219.1	OG0009468	2.67116	0	0	0	0	3.38293	0	0	0	2.17994	0	0	0	0	0	0	0	0	0	0	0	0	0.428685	0	0.302097	0	0.609128	NA	NA	NA	NA	NA	NA	NA	NA	NA	NA	NA	NA	NA	NA	NA	NA	NA	NA	NA	NA	NA
D-dichotoma_M_contig738.18227.1	OG0000641	7.7534	8.1497	8.10769	11.6426	10.9408	11.6768	8.41708	7.75132	8.21277	9.01284	8.86551	8.90558	8.30786	8.97209	8.15332	9.77966	9.26787	8.84862	8.39093	8.79886	9.39215	9.07172	8.71785	9.06265	8.68124	9.33756	9.20754	turquoise	0.583333	-0.888564	-0.800373	-0.459118	-0.270064	0.775499	0.275884	-0.286803	-0.114457	0.0966395	0.00140461	6.09864e-10	5.3887e-07	0.0159968	0.173084	2.02144e-06	0.163648	0.146939	0.569717	0.631571
D-dichotoma_M_contig738.18228.1	OG0009469	6.14573	4.45696	5.80653	10.3404	8.97327	9.91148	4.98661	5.32171	3.50777	6.36144	5.94738	5.61048	6.71787	6.38263	6.50398	7.07355	7.1321	6.66013	6.1746	6.76914	5.82464	5.79326	6.44552	6.65986	6.35863	6.5497	6.13097	blue	0.480137	-0.90642	-0.737098	-0.55382	-0.584033	0.796676	0.338755	-0.207973	-0.00352309	-0.0260885	0.0112553	7.59278e-11	1.1579e-05	0.00272625	0.00138164	6.63339e-07	0.0839062	0.297895	0.986085	0.897226
D-dichotoma_M_contig739.18231.1	OG0009470	2.67116	3.52119	4.16295	8.23281	5.41954	8.41172	4.98661	0	3.50777	0	3.47482	4.0834	2.40453	2.44974	2.70508	3.80402	2.51919	2.7246	1.92055	1.35967	0.853502	1.69506	3.41794	4.45747	3.92686	2.67547	3.10725	turquoise	0.684921	-0.607376	-0.734689	-0.11807	-0.282014	0.423481	0.182322	-0.210925	-0.368738	-0.116666	8.10527e-05	0.000779891	1.27908e-05	0.557513	0.154109	0.0277285	0.362715	0.290933	0.0584023	0.562243
D-dichotoma_M_contig739.18237.1	OG0009471	0	0	0	0	0	0	0	0	0	0	0	0	0	0	0	3.02202	1.70204	0	0	0	2.54629	0.804027	0	0	0	2.00632	2.45032	NA	NA	NA	NA	NA	NA	NA	NA	NA	NA	NA	NA	NA	NA	NA	NA	NA	NA	NA	NA	NA
D-dichotoma_M_contig1616.4301.1	OG0009472	4.79946	4.45696	4.46868	4.16764	5.99322	4.31207	4.27966	4.35734	4.04982	6.08949	5.94738	4.0834	8.20429	7.76725	7.79451	7.34876	7.65192	7.70044	7.5806	7.74907	8.02466	7.68488	7.52114	7.8865	8.23372	7.75273	7.27297	yellow	-0.71079	-0.162595	0.503368	-0.76061	-0.363979	0.402936	0.4654	0.293027	0.947724	0.0852335	3.25391e-05	0.417765	0.00743863	4.13067e-06	0.0619856	0.0371673	0.0144332	0.137982	6.57637e-14	0.672514
D-dichotoma_M_contig1617.4310.1	OG0009473	5.05383	5.01986	5.43573	8.7323	8.29692	8.88446	5.11997	5.8946	5.57551	6.78754	6.52453	7.00694	7.89144	7.38985	8.33934	8.41165	7.84811	7.9285	7.73948	8.15904	7.36807	7.13055	7.9605	7.63645	7.19559	7.3206	7.65404	blue	-0.00329939	-0.805743	-0.30612	-0.844163	-0.626539	0.9232	0.524402	0.0429156	0.50936	0.171052	0.986969	3.95387e-07	0.120439	3.13905e-08	0.000471329	7.04548e-12	0.00498557	0.831684	0.00665394	0.393621
D-dichotoma_M_contig1618.4322.1	OG0009474	0	0	0	4.16764	0	0	0	0	0	0	0	0	0	0	0	0	0	0	0	0	0	0.457315	0.230207	0	0	0	0	NA	NA	NA	NA	NA	NA	NA	NA	NA	NA	NA	NA	NA	NA	NA	NA	NA	NA	NA	NA	NA
D-dichotoma_M_contig1619.4328.1	OG0000642	9.162	9.00724	9.33025	7.63663	7.85112	7.1546	8.16264	9.32086	8.93256	8.16511	8.51273	8.64315	10.0906	9.40868	9.44574	8.68439	8.61306	9.40833	9.13369	9.05275	9.34996	9.29716	9.33452	9.46279	9.48591	8.98486	9.22284	turquoise	-0.792167	0.469352	0.803577	-0.159712	-0.0598915	-0.390154	0.0421719	0.394746	0.584864	-0.227228	8.49894e-07	0.013516	4.48481e-07	0.426179	0.76666	0.0442296	0.834561	0.0415798	0.00135479	0.254357
D-dichotoma_M_contig1621.4357.1	OG0009475	0	0	0	0	0	0	0	0	0	0	0	0	0.308699	0	0	0	0	0	0.6753	0	0	0	0.75874	0.537017	0	0.281597	0	NA	NA	NA	NA	NA	NA	NA	NA	NA	NA	NA	NA	NA	NA	NA	NA	NA	NA	NA	NA	NA
D-dichotoma_M_contig1621.4358.1	OG0009476	0	0	0	0	0	0	2.02518	0	0	0	0	0	0.308699	0	0	0	0	0	0	0	0	0	0	0	0	0.281597	0	NA	NA	NA	NA	NA	NA	NA	NA	NA	NA	NA	NA	NA	NA	NA	NA	NA	NA	NA	NA	NA
D-dichotoma_M_contig1980.6160.1	OG0009477	6.19942	5.73892	4.93537	0	0	4.31207	4.83965	5.63641	5.98297	6.16243	7.25521	6.8159	4.92346	4.51038	6.10919	5.05072	5.80123	4.91508	5.66517	5.20164	3.87941	2.94743	6.01492	5.07448	4.84395	4.86966	4.51106	turquoise	-0.431833	0.762899	0.686222	0.447925	0.333182	-0.463339	0.00798924	0.480316	0.0872838	0.3409	0.0244949	3.71319e-06	7.75853e-05	0.0191281	0.0894596	0.0149317	0.968452	0.0112207	0.665082	0.0818406
D-dichotoma_M_contig1982.6173.1	OG0009478	0	0	0	6.10614	0	0	0	0	0	0	0	0	0	0	0	1.06754	0	0.356693	0	0	0	0	0	0	0	0	0	blue	0.415708	-0.481776	-0.508698	-0.157442	-0.212855	0.360017	0.0621745	0.0625791	-0.187369	-0.0706737	0.0310407	0.0109411	0.00673706	0.432868	0.286439	0.0650974	0.758022	0.756494	0.349349	0.726119
D-dichotoma_M_contig1987.6185.1	OG0009479	0	0	0	0	0	0	0	0	0	0	0	0	0	0	0	0	0	0	0	0	0	0	3.82255	0	0	0	0	NA	NA	NA	NA	NA	NA	NA	NA	NA	NA	NA	NA	NA	NA	NA	NA	NA	NA	NA	NA	NA
D-dichotoma_M_contig1987.6186.1	OG0009480	4.6532	0	0	0	0	0	4.03141	2.5544	0	4.22163	3.47482	3.16609	2.52902	3.38563	2.49325	1.49898	3.59009	3.39733	4.57787	4.29067	3.87941	3.81295	3.1632	2.33877	3.03931	3.09489	2.30452	NA	NA	NA	NA	NA	NA	NA	NA	NA	NA	NA	NA	NA	NA	NA	NA	NA	NA	NA	NA	NA
D-dichotoma_M_contig1988.6189.1	OG0009481	1.88155	0	0	2.73491	0	0	0	0	0	0	0	0	0	0	0.236455	0	0	0.642448	0.261803	0	0	0	0	0.537017	0	0.281597	0	NA	NA	NA	NA	NA	NA	NA	NA	NA	NA	NA	NA	NA	NA	NA	NA	NA	NA	NA	NA	NA
D-dichotoma_M_contig3501.11885.1	OG0009482	10.2963	9.77508	9.97633	10.54	12.0368	9.17079	10.5082	10.1993	9.59605	9.96122	9.89495	10.0523	5.00076	4.19595	6.21329	4.37333	4.00892	5.23817	3.84111	4.60111	4.13267	5.06392	6.07168	4.10726	4.45708	3.39008	4.47743	yellow	0.712466	0.102501	-0.587496	0.742849	0.224312	-0.293823	-0.398659	-0.566776	-0.957522	0.0386875	3.05684e-05	0.610926	0.00127269	9.09018e-06	0.260668	0.136865	0.0394223	0.00205308	5.18112e-15	0.848067
D-dichotoma_M_contig3501.11886.1	OG0009483	6.14573	7.04455	7.25945	6.51593	9.08852	6.25655	6.39063	7.2019	6.6375	6.96113	6.35656	7.2531	2.98534	1.36471	3.05344	1.97169	2.40105	2.30066	0.6753	2.51065	0.853502	0.804027	4.52177	1.36647	2.37652	2.94143	2.64463	yellow	0.72297	0.0907725	-0.570172	0.709017	0.229686	-0.262598	-0.258431	-0.588291	-0.918728	0.059599	2.04587e-05	0.652508	0.00190234	3.4746e-05	0.249116	0.185737	0.193071	0.00124877	1.39451e-11	0.767769
D-dichotoma_M_contig3501.11887.1	OG0009484	0	0	0	0	0	0	0	0	0	0	0	0	0.308699	0	0.236455	0	1.36599	0.356693	1.37396	1.69489	0	0	1.62107	1.23445	0.551757	1.19739	0	NA	NA	NA	NA	NA	NA	NA	NA	NA	NA	NA	NA	NA	NA	NA	NA	NA	NA	NA	NA	NA
D-dichotoma_M_contig3502.11889.1	OG0009485	6.86347	7.48526	7.86763	8.33744	8.97327	7.99809	6.49253	7.93494	7.29114	5.7541	6.67497	7.39659	7.64718	6.5617	7.63304	8.61686	8.3831	7.3817	7.07374	7.43517	8.70372	8.22227	6.11913	6.51798	6.66384	8.24201	8.06963	grey	0.140067	-0.486603	-0.357931	-0.376946	0.108828	0.191919	-0.145951	-0.274065	-0.0272907	-0.390181	0.485916	0.010058	0.0667836	0.0526029	0.588962	0.337556	0.467593	0.166557	0.892516	0.0442139
D-dichotoma_M_contig3506.11895.1	OG0009486	4.30692	4.45696	4.72082	5.84729	0	6.06659	4.4914	4.66512	4.44292	3.53532	5.37406	3.16609	4.87736	3.58817	5.91847	6.09967	5.8301	4.48008	5.21003	5.21908	5.77235	5.14219	4.71471	4.31765	4.4417	5.01137	5.56162	red	-0.239895	0.0124189	0.284941	-0.218636	0.119837	-0.00652104	0.0209559	0.826375	0.297208	-0.0934015	0.22811	0.950978	0.149698	0.273241	0.551592	0.974248	0.917369	1.0947e-07	0.132191	0.643093
D-dichotoma_M_contig1962.6073.1	OG0009487	0	0	0	0	0	0	0	0	0	0	0	0	0	0	0	0	0	0	0	0	0	0	0	0	0	0	0	NA	NA	NA	NA	NA	NA	NA	NA	NA	NA	NA	NA	NA	NA	NA	NA	NA	NA	NA	NA	NA
D-dichotoma_M_contig1963.6074.1	OG0000643	8.10245	7.64488	8.0854	15.8477	15.5814	15.8159	9.27897	8.2898	8.56864	7.63485	7.34773	7.00694	5.03265	3.70894	3.54667	2.98922	3.18793	3.43524	4.3004	4.96377	5.10792	3.92347	5.58667	6.19733	4.05369	7.54531	6.23021	green	0.958188	-0.504701	-0.926635	0.210112	-0.0871557	0.196798	-0.140559	-0.555022	-0.750434	-0.107673	4.2683e-15	0.00725762	4.05215e-12	0.29284	0.665546	0.32518	0.484371	0.00265671	6.54193e-06	0.592948
D-dichotoma_M_contig1965.6080.1	OG0009488	0	5.42373	5.28743	0	0	3.38293	2.8361	3.96558	2.62933	3.53532	0	0	4.12621	2.64404	3.77027	5.47473	5.68597	3.57761	4.24091	4.35518	4.63244	4.76069	4.22082	4.26786	4.18881	4.81547	4.98788	turquoise	-0.525049	0.14858	0.531737	-0.336469	0.105151	-0.177757	0.0780078	0.474115	0.54787	-0.334516	0.00492265	0.459524	0.00431039	0.0861515	0.601687	0.375057	0.698941	0.0124751	0.00309383	0.0881049
D-dichotoma_M_contig1966.6081.1	OG0009489	0	0	0	0	0	0	0	0	0	0	0	0	0	0	0	0	0	0.356693	0	0	0	0	0	0	0.302097	0	0	NA	NA	NA	NA	NA	NA	NA	NA	NA	NA	NA	NA	NA	NA	NA	NA	NA	NA	NA	NA	NA
D-dichotoma_M_contig1968.6091.1	OG0009490	4.6532	4.76569	3.24132	0	0	0	3.73137	4.91865	4.75152	4.68479	4.97057	6.70997	7.41681	6.19891	7.24477	5.76372	5.9767	6.69179	7.11159	7.13796	5.98025	5.80293	6.4369	6.35666	6.80276	5.69675	5.32688	turquoise	-0.892488	0.534287	0.919882	-0.149604	0.0126794	-0.188381	0.163814	0.550785	0.710619	0.193472	3.98207e-10	0.00409463	1.17377e-11	0.4564	0.94995	0.346705	0.414237	0.00290873	3.27463e-05	0.333585
D-dichotoma_M_contig1968.6093.1	OG0009491	1.88155	0	0	0	0	0	3.73137	0	0	2.17994	0	0	1.85778	2.58214	2.29809	2.42852	1.08869	1.2645	3.28614	3.46843	2.81795	1.69506	2.92108	3.07741	2.16801	2.46632	2.05381	NA	NA	NA	NA	NA	NA	NA	NA	NA	NA	NA	NA	NA	NA	NA	NA	NA	NA	NA	NA	NA
D-dichotoma_M_contig2.6242.1	OG0009492	0	2.64168	0	2.73491	0	0	4.27966	0	3.50777	4.68479	0	3.16609	3.29688	3.87303	3.94726	2.95564	3.18793	3.50818	2.91957	2.72111	3.30388	2.54814	3.73153	5.02538	3.66069	3.73181	5.18825	NA	NA	NA	NA	NA	NA	NA	NA	NA	NA	NA	NA	NA	NA	NA	NA	NA	NA	NA	NA	NA
D-dichotoma_M_contig2.6246.1	OG0009493	11.6395	11.9466	11.273	12.8807	11.2062	12.8506	12.2187	11.0672	10.8021	12.6714	12.4371	12.5214	9.64694	11.6978	9.31469	10.821	10.6781	11.2537	10.2154	10.0871	12.4526	12.33	10.1645	11.2024	11.9486	11.4217	11.0562	turquoise	0.450835	-0.0797306	-0.401204	0.335425	0.37302	-0.00383434	-0.144774	-0.101618	-0.489196	0.254079	0.0182693	0.692608	0.0380678	0.0871916	0.0553181	0.984856	0.471228	0.614017	0.00960855	0.200943
D-dichotoma_M_contig2.6264.1	OG0000644	7.71704	7.15477	6.84755	12.104	11.6243	11.7732	7.79488	7.2944	7.47063	8.39437	8.3433	8.13012	6.54802	6.63974	6.66202	6.75283	6.62654	6.67208	6.78968	6.7271	5.91423	6.24025	6.52897	6.85795	6.97826	7.02596	6.68531	turquoise	0.895994	-0.636515	-0.968818	0.071647	-0.237526	0.444904	0.00785542	-0.538786	-0.639062	0.0703327	2.68301e-10	0.000357851	1.1552e-16	0.722492	0.232875	0.0200545	0.96898	0.00373644	0.000333042	0.727391
D-dichotoma_M_contig2.6265.1	OG0009494	1.88155	0	0	10.9396	9.94149	10.477	2.8361	4.35734	4.04982	4.87041	3.47482	5.35334	2.46812	2.96828	4.16342	5.27825	4.68873	3.0022	3.47869	4.18815	2.21131	1.99417	4.3116	2.91438	2.55867	4.15478	3.84761	turquoise	0.68168	-0.787826	-0.838952	-0.275398	-0.353559	0.719835	0.24719	-0.380745	-0.266552	0.174341	9.02948e-05	1.07286e-06	4.59643e-08	0.164422	0.0704261	2.31061e-05	0.213846	0.0500767	0.178957	0.384452
D-dichotoma_M_contig2.6266.1	OG0009495	2.67116	4.06365	4.16295	12.1728	11.5558	11.7258	4.27966	5.32171	5.40936	6.91965	7.05022	6.8159	4.97909	4.4248	5.39711	5.6685	5.75983	4.75944	5.21003	5.61784	4.34803	2.72132	5.6073	4.63815	3.66069	4.77061	3.61997	turquoise	0.736658	-0.722795	-0.900828	-0.119305	-0.336381	0.641934	0.134233	-0.467068	-0.441888	0.203197	1.17922e-05	2.05991e-05	1.52052e-10	0.553371	0.086239	0.000306883	0.504437	0.0140399	0.0210157	0.309375
D-dichotoma_M_contig2.6271.1	OG0009496	5.5435	6.98611	5.6932	8.59129	7.20261	8.14953	7.99913	6.21167	6.71078	8.28429	8.09901	8.00132	4.02412	3.94857	2.88975	3.1162	3.29118	2.95079	2.88112	2.76925	3.18092	2.3513	5.13974	3.79209	3.83565	3.82252	4.81018	green	0.801461	0.000116241	-0.616063	0.657953	0.256201	-0.0793141	-0.107078	-0.402834	-0.865856	0.294458	5.06474e-07	0.999541	0.000623206	0.000191449	0.197078	0.694137	0.595005	0.0372201	5.45246e-09	0.13598
D-dichotoma_M_contig2.6272.1	OG0009497	1.88155	0	0	5.34342	0	4.31207	0	0	0	0	0	0	0	4.4248	2.07235	1.58932	2.40105	2.03046	3.0978	2.6713	1.14426	0.804027	2.21197	3.11545	2.72037	2.22162	0	NA	NA	NA	NA	NA	NA	NA	NA	NA	NA	NA	NA	NA	NA	NA	NA	NA	NA	NA	NA	NA
D-dichotoma_M_contig2582.8895.1	OG0009498	0	0	0	0	0	0	0	0	0	2.17994	0	3.16609	0	0	0.776001	0.791248	1.23399	0.356693	0.483315	1.35967	0	0	0.230207	1.23445	0.949901	0.896975	1.50522	NA	NA	NA	NA	NA	NA	NA	NA	NA	NA	NA	NA	NA	NA	NA	NA	NA	NA	NA	NA	NA
D-dichotoma_M_contig2586.8901.1	OG0009499	0	0	0	0	0	0	0	0	0	0	0	0	0.562846	0	0	0	0	0	0.261803	0.533566	0	0.457315	0	0	0	0	0	NA	NA	NA	NA	NA	NA	NA	NA	NA	NA	NA	NA	NA	NA	NA	NA	NA	NA	NA	NA	NA
D-dichotoma_M_contig2593.8931.1	OG0009500	1.88155	2.64168	4.72082	5.12693	0	4.87262	6.54091	5.13421	6.2021	6.74067	7.25521	6.8159	4.12621	4.38909	4.24698	4.61829	4.10652	4.40566	4.9377	4.82261	4.74525	4.42721	5.35627	5.00526	4.4723	4.73602	5.14607	blue	-0.0624004	0.357182	0.287545	0.30986	0.329506	-0.0309221	0.102062	0.534954	0.0017566	0.632899	0.757169	0.0673969	0.14585	0.115745	0.0932709	0.878312	0.612463	0.00403976	0.993062	0.000395864
D-dichotoma_M_contig2593.8932.1	OG0009501	3.85035	3.52119	5.28743	5.84729	0	5.58975	5.45897	4.35734	5.22156	6.83293	6.67497	5.82865	3.58197	4.40705	4.11975	4.72177	3.96795	3.96212	5.40555	4.88948	4.74525	4.54714	5.56574	5.40902	4.78422	4.56265	5.33629	blue	0.023908	0.293005	0.229726	0.28152	0.265558	-0.0405448	0.101922	0.651379	-0.0242041	0.50747	0.905776	0.138013	0.249031	0.154864	0.180646	0.840863	0.612952	0.000233114	0.904614	0.00689358
D-dichotoma_M_contig2593.8933.1	OG0009502	0	0	0	0	6.40259	3.38293	0	3.42606	2.62933	4.47172	5.94738	5.82865	2.52902	2.51746	3.02215	3.2046	2.51919	2.95079	3.91908	3.65936	2.21131	2.63733	4.05053	3.18863	3.1942	2.67547	3.3119	grey	-0.0148794	-0.16537	-0.0809062	-0.149569	-0.142865	0.485199	0.33973	-0.355915	0.138768	0.672645	0.94128	0.409755	0.688297	0.456507	0.477158	0.0103085	0.0829628	0.0684449	0.490011	0.000121161
D-dichotoma_M_contig3893.12858.1	OG0009503	5.77332	5.58992	2.38634	4.16764	0	0	5.24204	4.91865	4.44292	4.47172	3.47482	6.01812	7.12043	6.87089	7.42003	7.97176	8.86673	7.77068	7.22146	6.97303	7.83121	8.51335	7.29507	7.30321	7.92769	8.6273	8.15054	turquoise	-0.794716	0.268305	0.786245	-0.399981	0.056627	-0.0387323	0.265053	0.627413	0.822127	0.0130591	7.39335e-07	0.176007	1.16637e-06	0.0387141	0.77906	0.847893	0.181507	0.000460272	1.44506e-07	0.948454
D-dichotoma_M_contig3899.12865.1	OG0009504	1.88155	0	0	4.56247	0	0	0	0	0	0	0	0	0	0	0	0	0	0	0	0	0	0	0.230207	0	0	0	0	NA	NA	NA	NA	NA	NA	NA	NA	NA	NA	NA	NA	NA	NA	NA	NA	NA	NA	NA	NA	NA
D-dichotoma_M_contig3900.12906.1	OG0009505	0	0	0	0	0	0	0	0	0	0	0	3.16609	0	0.336329	0	0	0	0	0	0	0	0	0	0	0	0	0	NA	NA	NA	NA	NA	NA	NA	NA	NA	NA	NA	NA	NA	NA	NA	NA	NA	NA	NA	NA	NA
D-dichotoma_M_contig3901.12910.1	OG0009506	0	0	0	4.16764	0	5.58975	2.8361	0	0	2.17994	3.47482	3.16609	0.562846	0.608885	0.918746	1.06754	1.36599	0.642448	0.6753	0.740931	0	0	1.53756	0	1.6306	1.05499	0.336476	turquoise	0.516696	-0.36316	-0.513689	0.0731125	-0.0939146	0.474115	0.229175	0.118641	-0.318012	0.46771	0.00578948	0.0626188	0.00613155	0.717044	0.641262	0.0124751	0.2502	0.555598	0.105979	0.013891
D-dichotoma_M_contig3901.12913.1	OG0009507	0	0	0	0	0	0	4.03141	0	0	5.18244	0	0	0.778857	3.10663	1.94467	2.37873	2.72989	0.642448	0	0.29131	0	0.457315	1.44892	1.36647	1.6306	1.65782	0.838351	NA	NA	NA	NA	NA	NA	NA	NA	NA	NA	NA	NA	NA	NA	NA	NA	NA	NA	NA	NA	NA
D-dichotoma_M_contig3903.12918.1	OG0009508	0	0	0	0	0	0	0	0	0	3.53532	0	3.16609	2.11778	2.86809	3.6729	3.41685	3.41826	2.66204	3.0978	3.46843	2.89822	1.69506	3.21787	0.537017	1.2616	3.5041	2.76101	NA	NA	NA	NA	NA	NA	NA	NA	NA	NA	NA	NA	NA	NA	NA	NA	NA	NA	NA	NA	NA
D-dichotoma_M_contig3903.12919.1	OG0009509	1.88155	0	0	0	0	0	0	0	0	3.53532	3.47482	0	3.55294	3.52376	4.08988	4.44766	4.38072	3.19127	3.64854	3.95827	3.24371	2.94743	3.82255	2.68069	1.92418	3.47643	3.76639	NA	NA	NA	NA	NA	NA	NA	NA	NA	NA	NA	NA	NA	NA	NA	NA	NA	NA	NA	NA	NA
D-dichotoma_M_contig3911.12934.1	OG0009510	11.5351	11.8289	11.2456	8.78875	7.97613	9.21726	10.733	10.3577	9.29617	8.90006	8.59052	8.80626	13.6121	14.8632	13.4523	14.1658	13.4525	13.5033	13.9353	13.7827	11.2365	12.6797	14.0676	15.1403	14.9207	14.0995	12.3555	turquoise	-0.726595	0.0661063	0.656284	-0.586102	-0.346037	0.069184	0.359745	0.546606	0.870987	-0.263041	1.77366e-05	0.743212	0.000201353	0.00131561	0.0770501	0.73168	0.065315	0.00317711	3.44682e-09	0.184968
D-dichotoma_M_contig3912.12937.1	OG0009511	3.55322	2.64168	0	0	0	4.31207	4.98661	3.96558	3.50777	8.28429	7.80475	8.04555	2.40453	2.7034	2.7818	2.52324	2.72989	3.27726	2.52993	0.922202	2.73296	3.41921	2.26486	5.47634	5.7578	3.90786	1.95953	grey	-0.0623505	0.433129	0.247719	0.441261	0.326319	-0.101345	0.182465	0.174349	-0.102536	0.709177	0.757357	0.0240219	0.212835	0.02122	0.0966733	0.614976	0.362331	0.384429	0.610802	3.4541e-05
D-dichotoma_M_contig327.11233.1	OG0009512	6.39619	6.40683	7.33696	2.73491	0	0	6.22285	7.10307	6.47874	6.08949	6.35656	6.01812	4.50537	4.2367	3.98019	6.51137	7.2754	4.71391	4.67096	4.83397	5.76166	5.94945	5.09662	4.42755	4.8322	6.63665	6.5664	blue	-0.489052	0.837609	0.760129	0.459003	0.730142	-0.699212	-0.168419	0.434452	0.093765	0.0767343	0.00963312	5.06007e-08	4.22354e-06	0.0160267	1.5391e-05	4.95275e-05	0.401052	0.0235466	0.641795	0.703635
D-dichotoma_M_contig327.11235.1	OG0009513	6.56932	7.56728	6.84755	9.20297	11.5152	9.63169	7.64802	6.94083	8.08079	8.11085	8.73456	8.80626	5.88792	5.10193	5.94374	5.69926	5.67328	4.98063	5.4522	5.17508	5.10792	5.03138	6.36907	6.03317	5.41601	6.06976	5.79792	turquoise	0.856356	-0.294393	-0.819781	0.408173	0.0541023	0.170634	-0.0641007	-0.701941	-0.809887	0.217114	1.21521e-08	0.136069	1.67934e-07	0.034548	0.788686	0.394796	0.750756	4.49381e-05	3.09325e-07	0.276678
D-dichotoma_M_contig327.11237.1	OG0009514	2.67116	2.64168	0	8.33744	9.03205	6.83521	2.02518	2.5544	0	3.9189	4.40844	3.16609	0	0.838041	0.439558	0.630339	1.36599	0	0.6753	0.740931	0	0	1.70001	1.23445	0.302097	0.719506	0.838351	turquoise	0.846657	-0.557442	-0.913325	0.123946	-0.175822	0.415284	0.0384577	-0.611191	-0.634322	0.163472	2.60249e-08	0.00252129	3.02611e-11	0.537927	0.380361	0.0312301	0.848959	0.000707306	0.000380506	0.415226
D-dichotoma_M_contig327.11241.1	OG0000645	7.85727	7.25717	7.13478	8.28607	7.39403	8.1008	7.96408	7.71831	8.08079	6.96113	6.16643	6.01812	2.52902	0	4.28702	2.92127	0	1.56726	5.12209	4.83397	1.14426	3.25982	0.899188	4.62503	1.11415	4.58873	7.5324	green	0.807989	0.0446289	-0.5206	0.599678	0.256644	-0.269471	-0.392855	-0.365803	-0.809942	-0.0706805	3.46387e-07	0.825065	0.00536955	0.000946313	0.196277	0.174065	0.0426553	0.0605927	3.08304e-07	0.726093
D-dichotoma_M_contig327.11242.1	OG0009515	5.62424	5.87397	5.80653	9.58942	5.99322	9.83904	7.30005	6.00821	7.08611	6.69222	7.15635	7.00694	8.47389	7.72848	7.03939	7.80151	7.9357	7.94993	6.75555	7.05056	9.68724	9.65979	7.84258	7.55576	7.84387	7.96797	9.31735	blue	-0.0206016	-0.55958	-0.146003	-0.617061	-0.0969721	0.533656	0.297685	0.398164	0.396264	0.0694909	0.918761	0.0024067	0.467432	0.000607105	0.630392	0.00414716	0.131541	0.0396905	0.0407321	0.730533
D-dichotoma_M_contig328.11279.1	OG0009516	0	2.64168	0	3.62227	4.45286	3.38293	2.02518	2.5544	0	5.03484	4.40844	5.35334	3.79534	3.67968	4.69673	3.55777	1.59849	2.52814	4.80022	5.05399	2.64264	0.457315	4.88487	3.98932	1.51777	2.46632	2.45032	NA	NA	NA	NA	NA	NA	NA	NA	NA	NA	NA	NA	NA	NA	NA	NA	NA	NA	NA	NA	NA
D-dichotoma_M_contig32.11034.1	OG0009517	0	0	0	6.22001	4.45286	6.5747	0	3.96558	3.50777	0	3.47482	0	0	2.37869	2.49325	0.791248	2.13107	0.880852	2.06475	1.22805	2.64264	0.457315	1.44892	3.1525	2.95515	1.65782	2.30452	turquoise	0.564484	-0.682506	-0.682225	-0.295393	-0.342196	0.494615	0.171713	-0.192914	-0.209729	-0.0362865	0.00216051	8.78529e-05	8.86776e-05	0.134683	0.0806107	0.00872348	0.391768	0.335009	0.293742	0.857398
D-dichotoma_M_contig32.11039.1	OG0009518	8.14412	9.16043	9.09395	8.97868	9.38759	8.70046	8.01634	9.26481	9.97636	9.32232	10.6159	11.0298	10.3946	8.65821	10.2649	10.2116	10.5111	10.037	9.92482	10.3624	10.9626	9.98163	10.0945	9.05227	9.17894	10.0722	10.3739	grey	-0.445617	0.0370005	0.335129	-0.268456	0.171772	0.227849	0.157104	0.140649	0.407343	0.420428	0.0198327	0.854621	0.0874887	0.175756	0.391602	0.253026	0.433871	0.484089	0.0349528	0.0289938
D-dichotoma_M_contig32.11040.1	OG0009519	3.85035	2.64168	4.72082	4.87213	5.99322	4.31207	4.98661	5.32171	5.40936	6.01267	6.35656	7.00694	7.35718	5.16663	6.76719	7.50779	7.32085	6.26175	6.24062	6.26401	8.05123	7.30402	6.81268	5.64834	5.70724	7.3206	7.88479	yellow	-0.476449	-0.111088	0.350041	-0.501959	0.0763774	0.396992	0.387349	0.154531	0.651688	0.399564	0.01199	0.581203	0.0734677	0.00763391	0.704953	0.0403303	0.0459134	0.441529	0.000230993	0.0389366
D-dichotoma_M_contig1496.3545.1	OG0009520	0	0	2.38634	2.73491	0	0	3.35209	0	4.04982	0	3.47482	0	2.69768	3.31127	2.34941	3.36664	2.05487	2.38054	3.4527	2.98847	0	2.12329	4.10955	2.87058	3.33406	3.09489	1.20998	NA	NA	NA	NA	NA	NA	NA	NA	NA	NA	NA	NA	NA	NA	NA	NA	NA	NA	NA	NA	NA
D-dichotoma_M_contig1497.3552.1	OG0009521	2.67116	2.64168	2.38634	6.51593	0	6.71082	5.81423	0	2.62933	3.01127	3.47482	4.63971	0	1.85814	0.236455	0.449203	2.27237	0	1.76031	1.22805	2.33182	0	1.14471	1.36647	0.76452	1.65782	2.58273	turquoise	0.656052	-0.138338	-0.486731	0.355005	0.221101	0.0851374	-0.0836401	0.0910761	-0.555704	0.210887	0.000202765	0.491372	0.0100353	0.069205	0.267734	0.672863	0.678311	0.651418	0.00261794	0.291023
D-dichotoma_M_contig1498.3556.1	OG0009522	4.49042	4.76569	6.55494	5.53161	0	6.25655	6.49253	6.62183	7.42781	8.26785	9.04203	8.83174	5.5993	3.42142	4.84713	4.83689	4.73829	4.06241	3.77973	4.05854	2.81795	3.46866	5.70622	4.41235	4.50226	5.02098	4.15468	brown	0.155682	0.485468	0.121978	0.660446	0.416843	-0.277686	0.0113109	0.333418	-0.411344	0.521794	0.438093	0.01026	0.544452	0.000177454	0.0305382	0.160802	0.955347	0.0892189	0.0330349	0.00524631
D-dichotoma_M_contig1498.3557.1	OG0000646	8.01532	8.80235	8.90327	8.11999	8.63699	8.3712	9.21333	8.88814	9.81955	10.4249	10.9689	10.7245	8.13129	6.8282	7.26329	6.87684	6.98072	6.39754	5.91872	6.14132	6.31598	6.49415	7.99418	6.92373	7.24294	7.63877	6.91933	brown	0.48392	0.341572	-0.265944	0.799619	0.431656	-0.272123	-0.0630015	-0.340684	-0.759445	0.4619	0.0105411	0.0812008	0.179989	5.62394e-07	0.0245601	0.169702	0.7549	0.0820464	4.35884e-06	0.0152879
D-dichotoma_M_contig1499.3563.1	OG0009523	3.55322	0	2.38634	7.79201	7.71425	8.28657	3.35209	4.35734	0	2.17994	4.97057	0	0.562846	0	1.04863	0.449203	0	0.356693	1.92055	0	0.488969	0	1.53756	2.51984	0.302097	2.52152	3.52441	turquoise	0.876756	-0.56666	-0.8481	0.0437457	-0.19212	0.331612	0.0142195	-0.456199	-0.554246	-0.0221582	2.01002e-09	0.00205837	2.33156e-08	0.828476	0.33704	0.0910724	0.94388	0.0167694	0.00270139	0.912645
D-dichotoma_M_contig496.15186.1	OG0009524	4.30692	4.45696	3.24132	4.87213	0	4.87262	6.03296	2.5544	5.85951	3.01127	4.97057	3.16609	3.33148	5.46129	4.47205	4.15406	4.02898	3.54331	4.78988	3.87271	3.04648	2.45307	4.77064	4.06901	3.68702	3.23359	3.38627	grey	-0.026151	0.230146	0.19227	0.180718	0.0241096	-0.114977	0.00811647	0.598	-0.00337069	0.0594203	0.896981	0.248143	0.336656	0.367023	0.904985	0.567953	0.96795	0.000986424	0.986687	0.768447
D-dichotoma_M_contig496.15191.1	OG0000647	10.0914	10.7035	10.3291	5.12693	4.45286	4.31207	10.0461	9.77868	11.2613	10.9111	11.4531	11.1662	11.2537	10.7511	10.7328	11.2219	10.964	10.814	10.786	11.0475	10.6013	10.6787	11.0341	10.8063	10.5556	10.8968	10.9318	turquoise	-0.797512	0.789711	0.969303	0.17602	0.378009	-0.455417	0.0477075	0.53319	0.482871	0.243365	6.33118e-07	9.70309e-07	9.52318e-17	0.379817	0.0518861	0.0169816	0.8132	0.00418635	0.0107353	0.221247
D-dichotoma_M_contig497.15203.1	OG0009525	6.19942	6.57486	4.93537	2.73491	0	0	3.73137	4.91865	0	3.9189	0	0	0.308699	0.838041	4.07471	1.75461	0	0.356693	0.261803	0	0	0	0.75874	0.927471	2.01012	0	0	brown	0.149921	0.432797	0.0336227	0.575382	0.169585	-0.641887	-0.313722	-0.00293335	-0.465253	-0.377687	0.455436	0.0241422	0.867773	0.00168963	0.397751	0.000307298	0.111038	0.988414	0.0144684	0.0521028
D-dichotoma_M_contig498.15211.1	OG0009526	3.55322	0	0	2.73491	0	0	4.83965	0	0	6.08949	0	0	6.46863	7.94683	6.22707	7.22213	6.64939	7.01014	6.96535	6.7087	8.13437	7.45272	6.65815	7.59835	7.40835	7.05664	6.938	yellow	-0.659363	-0.071893	0.545544	-0.65544	-0.258806	0.296932	0.38863	0.49325	0.916811	0.0298216	0.000183418	0.721577	0.00324864	0.000206529	0.192402	0.132568	0.0451383	0.00893967	1.84679e-11	0.882613
D-dichotoma_M_contig498.15212.1	OG0000648	8.22402	8.09545	6.79358	13.4551	12.9929	12.9277	8.58798	7.15333	7.96576	9.24886	9.31839	9.14797	8.16045	10.2162	8.7761	9.77486	8.82361	9.87404	7.87527	7.55674	6.43512	8.15401	8.65856	9.73963	9.14194	9.0896	7.00148	turquoise	0.599749	-0.758917	-0.803124	-0.276927	-0.474972	0.704385	0.319913	-0.391869	-0.23023	0.122687	0.000944646	4.46592e-06	4.60375e-07	0.161996	0.0122951	4.11519e-05	0.103793	0.0432251	0.247966	0.542097
D-dichotoma_M_contig498.15215.1	OG0009527	4.09662	0	0	0	0	0	4.03141	0	0	2.17994	0	0	2.19499	2.64404	2.07235	2.32715	1.88922	1.2645	1.48067	0.922202	1.14426	0.804027	3.10637	2.87058	2.16801	2.40893	2.05381	NA	NA	NA	NA	NA	NA	NA	NA	NA	NA	NA	NA	NA	NA	NA	NA	NA	NA	NA	NA	NA
D-dichotoma_M_contig2828.9775.1	OG0009528	3.85035	4.06365	0	6.68411	4.45286	5.27529	5.11997	0	0	5.03484	0	0	7.0752	7.67017	7.90154	7.23092	7.83962	7.17041	8.24529	7.86021	6.90221	6.73545	8.60572	8.60385	8.3608	7.57823	9.04774	brown	-0.342233	-0.444201	0.177799	-0.83124	-0.509296	0.539054	0.483698	0.329538	0.814197	-0.125827	0.0805764	0.0202753	0.374944	7.89126e-08	0.00666196	0.00371594	0.0105821	0.0932369	2.38099e-07	0.531726
D-dichotoma_M_contig2828.9776.1	OG0009529	3.85035	4.45696	3.24132	0	0	0	4.83965	3.96558	2.62933	3.9189	3.47482	0	0	0	0	0	0	0	0	0	0	0	0	0	0.302097	0	0	NA	NA	NA	NA	NA	NA	NA	NA	NA	NA	NA	NA	NA	NA	NA	NA	NA	NA	NA	NA	NA
D-dichotoma_M_contig2829.9779.1	OG0009530	0	0	0	0	0	0	0	0	0	0	0	0	0.562846	0	0.918746	0.791248	0	0	0.844711	0	0	0	0.230207	1.36647	0	0	0.336476	NA	NA	NA	NA	NA	NA	NA	NA	NA	NA	NA	NA	NA	NA	NA	NA	NA	NA	NA	NA	NA
D-dichotoma_M_contig2833.9791.1	OG0009531	1.88155	0	0	0	0	0	0	0	0	0	0	0	2.40453	2.58214	1.16778	2.21812	0	1.42381	1.67299	1.48027	2.44304	2.24179	1.97858	2.46197	1.92418	1.55574	1.75018	NA	NA	NA	NA	NA	NA	NA	NA	NA	NA	NA	NA	NA	NA	NA	NA	NA	NA	NA	NA	NA
D-dichotoma_M_contig2833.9793.1	OG0009532	9.03485	9.03633	8.89048	0	0	0	9.67006	8.47905	8.68231	8.61831	7.51667	7.46331	8.54196	7.95449	8.47333	7.61785	7.78465	7.67096	7.80641	7.98777	8.33515	8.17464	7.50061	7.48307	7.83654	7.38898	7.89119	turquoise	-0.725285	0.895644	0.938977	0.346583	0.439708	-0.688553	-0.159364	0.470647	0.31131	0.0400259	1.86806e-05	2.79261e-10	4.33656e-13	0.0765535	0.0217332	7.1702e-05	0.427202	0.013226	0.113961	0.842874
D-dichotoma_M_contig2834.9795.1	OG0000052	5.05383	3.52119	4.72082	0	5.41954	0	5.24204	3.42606	2.62933	3.01127	0	4.0834	3.1495	5.95209	3.28194	3.17573	4.14378	5.31133	2.52993	2.76925	4.48429	4.94667	2.88774	3.96869	4.69622	3.29824	3.38627	turquoise	-0.464677	0.311057	0.400675	-0.0171467	0.067234	-0.344263	-0.118424	-0.210222	0.264692	-0.30295	0.0146065	0.11427	0.0383464	0.932351	0.73898	0.0786793	0.556327	0.292582	0.182125	0.124529
D-dichotoma_M_contig2835.9796.1	OG0009533	0	0	0	0	0	0	0	0	0	0	0	0	3.86786	6.43172	2.29809	3.70647	2.20345	4.01313	2.71619	2.72111	2.89822	4.40198	4.29898	6.0282	5.04055	3.98843	4.40772	yellow	-0.631937	-0.144002	0.506074	-0.72876	-0.349966	0.321595	0.532468	0.422006	0.920675	-0.0336999	0.00040655	0.473621	0.00707516	1.62699e-05	0.0735337	0.101887	0.00424763	0.0283343	1.04104e-11	0.867472
D-dichotoma_M_contig907.19809.1	OG0009534	0	0	0	0	0	0	0	0	0	0	0	0	3.98118	6.55366	4.23339	4.41097	3.1518	5.23817	4.51648	4.60111	4.70118	4.65787	2.78285	3.53578	3.03931	2.72335	3.3119	yellow	-0.749402	-0.135967	0.524084	-0.744261	-0.355263	0.319459	0.259449	0.437069	0.920978	-0.065689	6.84605e-06	0.498898	0.00501677	8.55746e-06	0.0689883	0.104313	0.191261	0.0226288	9.94089e-12	0.74478
D-dichotoma_M_contig909.19821.1	OG0009535	3.17858	0	0	2.73491	0	0	4.83965	0	0	5.31632	0	0	5.84065	5.36347	4.44871	4.07809	4.30049	4.48008	4.5658	4.35518	6.33052	5.77372	4.26043	5.19482	5.04055	5.04001	4.82362	yellow	-0.590894	-0.0483929	0.498447	-0.568257	-0.217247	0.245471	0.334575	0.470558	0.82561	0.0334711	0.0011731	0.810564	0.0081398	0.0019861	0.276375	0.217151	0.0880461	0.0132459	1.15142e-07	0.868364
D-dichotoma_M_contig910.19850.1	OG0009536	4.09662	5.87397	3.77451	0	0	0	5.55632	0	0	3.01127	4.97057	4.63971	5.99434	1.20958	2.62404	1.06754	3.35612	0.356693	0.261803	0.740931	0	3.25982	5.9837	8.03528	8.00952	7.19253	6.62516	grey	-0.175335	0.31634	0.408431	0.0699303	0.149901	-0.159184	0.496405	0.214609	0.245783	0.158368	0.381703	0.10793	0.034423	0.728892	0.455496	0.427731	0.00844661	0.282393	0.216549	0.430132
D-dichotoma_M_contig911.19854.1	OG0009537	5.16596	5.01986	2.38634	5.84729	0	6.06659	6.22285	3.96558	2.62933	5.55175	3.47482	3.16609	3.63835	4.4248	3.80745	2.56836	3.03766	4.26541	4.38527	3.68469	3.30388	3.14285	4.62652	4.90024	4.2252	2.94143	2.8687	grey	0.157498	0.0686257	-0.0200238	0.176964	-0.167709	-0.0596774	-0.0347401	0.528902	-0.107392	0.0197825	0.432703	0.733768	0.921032	0.377226	0.40307	0.767472	0.863418	0.0045615	0.593919	0.921982
D-dichotoma_M_contig911.19855.1	OG0009538	5.90842	5.42373	4.93537	8.67354	7.20261	8.85538	7.24271	6.30356	6.30033	6.59016	6.67497	4.63971	4.52044	6.54962	4.82917	4.89117	3.81465	5.58019	6.69033	5.95615	6.14558	5.38043	6.03789	5.94087	4.97794	4.78195	5.60898	turquoise	0.731565	-0.465674	-0.73276	0.0800141	-0.245361	0.294464	-0.206766	-0.246521	-0.490682	0.0259305	1.45309e-05	0.014368	1.3842e-05	0.691567	0.217363	0.135971	0.300769	0.215128	0.00935864	0.897845
D-dichotoma_M_contig911.19856.1	OG0009539	0	0	2.38634	6.68411	7.20261	5.84779	2.02518	0	0	2.17994	0	0	1.65412	2.76041	0.439558	0.791248	0	1.81737	0.6753	0.740931	2.64264	2.3513	1.97858	2.87058	1.51777	1.75315	3.61997	turquoise	0.623123	-0.830919	-0.789636	-0.414949	-0.396835	0.597219	0.193204	-0.43334	-0.144561	-0.134003	0.000516836	8.06618e-08	9.74205e-07	0.0313801	0.0404167	0.00100559	0.334269	0.0239454	0.471888	0.505177
D-dichotoma_M_contig911.19861.1	OG0009540	8.18462	8.17608	8.0854	2.73491	5.99322	0	8.25253	6.82155	7.70388	7.38348	7.25521	7.09375	7.51228	8.27372	7.88098	7.81795	7.26909	7.76139	7.7314	7.58559	6.65897	7.1267	7.49371	7.81463	7.7765	7.50308	6.63282	blue	-0.694706	0.756871	0.815258	0.233615	0.243037	-0.516875	-0.0557283	0.0921254	0.348433	0.0378361	5.80225e-05	4.9034e-06	2.23023e-07	0.240886	0.221891	0.00576966	0.782483	0.647657	0.074891	0.851374
D-dichotoma_M_contig1561.3934.1	OG0009541	1.88155	0	2.38634	0	5.99322	0	2.8361	0	3.50777	0	0	0	0	0	0	0	0.293208	0	0	0	0	0	0	0	0	0	0	red	0.406563	-0.0568755	-0.41554	0.272245	0.0546233	-0.154306	-0.304613	-0.801102	-0.483584	-0.253773	0.0353372	0.778114	0.0311155	0.169503	0.786697	0.442205	0.122371	5.16977e-07	0.0106031	0.201504
D-dichotoma_M_contig1562.3937.1	OG0009542	0	0	0	0	0	0	2.8361	0	0	0	0	0	4.1651	5.28793	3.99638	2.73594	2.51919	5.31133	4.82068	4.40174	3.24371	3.01555	4.52177	4.94317	4.92361	3.05803	2.8687	NA	NA	NA	NA	NA	NA	NA	NA	NA	NA	NA	NA	NA	NA	NA	NA	NA	NA	NA	NA	NA
D-dichotoma_M_contig1562.3941.1	OG0009543	2.67116	0	2.38634	0	0	3.38293	2.8361	3.42606	0	3.9189	0	3.16609	2.03621	3.58817	2.99017	2.88606	2.57482	4.36696	2.62606	2.12309	2.64264	3.69326	1.84601	4.26786	3.68702	3.05803	1.50522	NA	NA	NA	NA	NA	NA	NA	NA	NA	NA	NA	NA	NA	NA	NA	NA	NA	NA	NA	NA	NA
D-dichotoma_M_contig1563.3947.1	OG0000649	8.03021	8.62221	8.03977	4.16764	0	4.31207	8.57642	7.71831	7.42781	8.64401	8.51273	7.75725	7.02058	8.37303	7.42751	7.71511	7.2775	8.08571	7.64655	7.57547	7.71135	8.12346	7.33117	7.77061	8.27118	8.31705	7.39956	turquoise	-0.629892	0.799836	0.870276	0.315346	0.42946	-0.556678	-0.0679159	0.729473	0.304881	0.166093	0.000430115	5.55526e-07	3.6773e-09	0.109103	0.0253809	0.00256342	0.736425	1.5811e-05	0.122027	0.407682
D-dichotoma_M_contig1564.3951.1	OG0009544	6.72388	7.71852	5.9116	0	0	0	7.53314	5.8946	7.47063	8.07352	7.8686	7.85989	3.49306	4.92621	3.47915	4.0143	4.6374	4.58496	6.02393	5.44337	4.92843	4.09071	4.93468	4.8219	4.6568	3.36011	3.82104	blue	-0.363171	0.948168	0.650104	0.733095	0.564592	-0.701746	-0.320451	0.233114	-0.146665	0.317179	0.0626103	5.92643e-14	0.000242057	1.36542e-05	0.00215534	4.52525e-05	0.103181	0.241925	0.465392	0.106949
D-dichotoma_M_contig1564.3954.1	OG0009545	6.68677	5.73892	5.6932	9.18906	9.24579	9.07312	9.08054	7.78359	8.16142	8.4537	8.25048	7.70306	5.76671	6.83153	6.32647	6.78185	6.23591	6.52165	6.89232	6.62614	7.49933	6.63616	7.21837	6.64693	6.1378	6.58899	6.76413	turquoise	0.728088	-0.34809	-0.715304	0.239974	0.0334392	0.312382	-0.103304	-0.451423	-0.570058	0.339413	1.67133e-05	0.0751971	2.74728e-05	0.227952	0.868488	0.112655	0.608121	0.0180997	0.00190725	0.0832682
D-dichotoma_M_contig124.1897.1	OG0009546	3.85035	3.52119	5.12211	0	0	0	2.02518	0	0	0	0	3.16609	8.66409	7.15757	8.25354	7.19181	7.52528	6.42135	7.09279	6.93132	4.74525	5.80293	7.30773	7.53311	7.56386	7.18613	5.50433	yellow	-0.768659	0.0481128	0.654399	-0.607539	-0.318952	0.124278	0.3766	0.486612	0.880998	-0.186881	2.82529e-06	0.811641	0.000213077	0.000776663	0.104894	0.536831	0.0528378	0.0100563	1.32858e-09	0.350629
D-dichotoma_M_contig124.1905.1	OG0009547	9.12085	9.18662	9.39511	0	0	0	9.1367	7.93494	7.96576	10.5827	10.9246	10.5816	10.0655	9.57036	9.52495	9.8251	9.30741	9.13148	9.68818	9.80988	9.31566	8.86222	9.74493	9.53779	8.97701	9.45342	9.28004	turquoise	-0.775268	0.813352	0.958248	0.224221	0.369916	-0.458551	0.0473171	0.503852	0.44857	0.289979	2.04482e-06	2.50763e-07	4.19352e-15	0.260867	0.0575407	0.0161446	0.814703	0.00737237	0.0189351	0.142317
D-dichotoma_M_contig1623.4363.1	OG0009548	0	0	0	0	0	0	0	0	0	2.17994	0	0	0	0.336329	0	0	0	0	0.483315	0	0	0	0.230207	0	0	0	0.336476	NA	NA	NA	NA	NA	NA	NA	NA	NA	NA	NA	NA	NA	NA	NA	NA	NA	NA	NA	NA	NA
D-dichotoma_M_contig1625.4367.1	OG0009549	0	0	0	0	0	0	0	0	0	0	0	0	0	0	0	0	0	0	0.261803	0	0	0	0.230207	0	0	0	0	NA	NA	NA	NA	NA	NA	NA	NA	NA	NA	NA	NA	NA	NA	NA	NA	NA	NA	NA	NA	NA
D-dichotoma_M_contig1626.4373.1	OG0009550	0	0	0	3.62227	0	0	3.35209	0	0	2.17994	0	0	0.562846	0.838041	0.918746	0	0.293208	0.880852	0.844711	1.08322	0.488969	0.804027	1.70001	0.537017	0.551757	0	1.0361	NA	NA	NA	NA	NA	NA	NA	NA	NA	NA	NA	NA	NA	NA	NA	NA	NA	NA	NA	NA	NA
D-dichotoma_M_contig4861.15002.1	OG0009551	1.88155	3.52119	2.38634	0	4.45286	0	2.02518	0	0	4.22163	0	0	1.41691	0.838041	3.43232	1.49898	0	1.2645	3.71562	3.43897	2.07981	1.85235	0.230207	1.48742	0.76452	0.517103	0	NA	NA	NA	NA	NA	NA	NA	NA	NA	NA	NA	NA	NA	NA	NA	NA	NA	NA	NA	NA	NA
D-dichotoma_M_contig4861.15003.1	OG0009552	3.17858	0	0	0	0	0	4.27966	0	0	5.31632	0	0	3.3983	5.61603	3.94726	7.43047	7.9089	3.73784	4.49118	4.24032	3.52224	4.81905	5.72522	5.40135	4.75962	7.56186	6.26019	yellow	-0.574304	0.0283477	0.561482	-0.525574	-0.0426107	0.229248	0.501566	0.430213	0.834548	0.0883168	0.00173187	0.888378	0.00230847	0.00487209	0.832864	0.250044	0.0076892	0.025097	6.27957e-08	0.66135
D-dichotoma_M_contig4867.15009.1	OG0009553	6.25119	6.31485	5.12211	5.69807	5.99322	6.42437	7.60316	5.77127	5.57551	7.50064	7.66789	7.09375	7.54399	8.00697	7.3681	6.84051	7.20883	6.90263	5.08028	5.04424	7.39253	6.6253	6.98019	7.1695	6.9968	6.58899	7.21548	grey	-0.307087	0.115936	0.29014	-0.0935583	0.13513	0.175373	0.551404	0.188765	0.344655	0.502951	0.119213	0.564709	0.142086	0.642533	0.50157	0.381599	0.0028707	0.345704	0.0783176	0.00749598
D-dichotoma_M_contig4870.15023.1	OG0009554	0	0	0	0	0	0	0	0	0	0	0	0	0	0	0	0	0	0	0	0	0	0	0	0.293353	0	0	0	NA	NA	NA	NA	NA	NA	NA	NA	NA	NA	NA	NA	NA	NA	NA	NA	NA	NA	NA	NA	NA
D-dichotoma_M_contig4873.15025.1	OG0009555	1.88155	0	2.38634	2.73491	0	0	0	2.5544	0	8.25123	8.66434	8.64315	2.52902	2.58214	3.98019	2.03736	2.95621	2.21609	3.80048	2.81584	2.44304	1.08335	2.88774	2.20406	1.51777	2.62596	2.91967	grey	-0.111813	0.301262	0.217821	0.277114	0.190978	0.129506	0.24751	0.144807	0.00177385	0.840128	0.578724	0.126747	0.275077	0.161701	0.339973	0.519697	0.213234	0.471126	0.992994	4.22247e-08
D-dichotoma_M_contig4873.15026.1	OG0009556	2.67116	0	0	2.73491	0	0	0	2.5544	0	7.11606	8.20174	8.21002	1.54039	0.838041	2.29809	2.32715	2.68003	1.42381	3.47869	2.6713	0	1.99417	1.53756	2.33877	1.11415	2.08171	2.76101	grey	-0.00821474	0.269234	0.141503	0.310957	0.224003	0.138785	0.207959	0.0975919	-0.0685669	0.826242	0.967562	0.174458	0.481412	0.114393	0.261342	0.489959	0.297927	0.628197	0.733988	1.10437e-07
D-dichotoma_M_contig4880.15035.1	OG0009557	10.1641	10.648	9.49148	0	0	0	10.071	9.06923	9.13247	8.76606	7.66789	7.00694	1.75954	0	4.83818	2.27366	0	2.7246	4.72623	4.53303	1.38613	2.54814	0	0	0	0	0	blue	0.0839765	0.766808	0.190453	0.918998	0.506046	-0.794501	-0.650334	-0.0605957	-0.629645	0.00133744	0.677085	3.08716e-06	0.341329	1.33972e-11	0.00707877	7.48132e-07	0.000240422	0.763993	0.000433042	0.994717
D-dichotoma_M_contig4880.15036.1	OG0009558	8.07399	4.45696	5.12211	0	0	0	5.64751	4.91865	5.22156	4.22163	4.40844	0	0	0	3.75131	0	0	0.880852	2.25718	1.7913	0	0	0	0	0	0	0	blue	0.148504	0.663722	0.13245	0.815458	0.364329	-0.764179	-0.581915	-0.0590985	-0.586574	-0.149515	0.459756	0.000160438	0.510167	2.20273e-07	0.0617165	3.49667e-06	0.00145216	0.769667	0.00130096	0.456671
D-dichotoma_M_contig4890.15055.1	OG0009559	0	0	0	0	0	0	0	0	0	2.17994	0	0	1.28187	1.20958	1.04863	2.65458	0.927098	0.356693	1.37396	1.59157	0	0	1.91382	1.48742	1.39536	0.896975	0.838351	NA	NA	NA	NA	NA	NA	NA	NA	NA	NA	NA	NA	NA	NA	NA	NA	NA	NA	NA	NA	NA
D-dichotoma_M_contig4891.15057.1	OG0009560	7.0504	7.35277	6.6184	5.12693	8.91199	7.1546	7.60316	7.61449	7.66753	8.63122	7.59426	7.32663	2.19499	0.608885	0.439558	0	0.536773	0.880852	1.99445	2.04702	0.488969	1.08335	0.899188	2.20406	2.91115	2.15336	1.20998	yellow	0.698146	0.187329	-0.505857	0.789618	0.290016	-0.339553	-0.379049	-0.546585	-0.932686	0.107735	5.143e-05	0.349453	0.00710375	9.75119e-07	0.142264	0.0831327	0.0511925	0.00317851	1.42831e-12	0.592734
D-dichotoma_M_contig4901.15102.1	OG0009561	0	0	0	0	0	0	0	0	0	3.01127	0	0	3.18778	3.73762	2.24488	3.41685	2.13107	3.43524	3.13094	3.02858	4.60878	4.40198	2.66973	3.76841	3.88197	2.52152	4.37157	NA	NA	NA	NA	NA	NA	NA	NA	NA	NA	NA	NA	NA	NA	NA	NA	NA	NA	NA	NA	NA
D-dichotoma_M_contig5754.16553.1	OG0009562	0	0	0	0	0	0	0	0	0	0	0	0	0	0	0	0	0	0	0	0	0	0	0	0	0	0	0	NA	NA	NA	NA	NA	NA	NA	NA	NA	NA	NA	NA	NA	NA	NA	NA	NA	NA	NA	NA	NA
D-dichotoma_M_contig5757.16555.1	OG0009563	0	0	0	0	0	0	0	0	0	0	0	0	0	0	0	0.242014	0	0	0	0	0	0	0	0	0	0	0	NA	NA	NA	NA	NA	NA	NA	NA	NA	NA	NA	NA	NA	NA	NA	NA	NA	NA	NA	NA	NA
D-dichotoma_M_contig5773.16570.1	OG0009564	0	0	0	0	0	0	2.02518	0	0	4.47172	0	0	0.562846	2.05328	3.08406	1.75461	1.79866	1.56726	3.60201	3.55337	2.54629	2.24179	1.14471	1.70259	1.51777	2.46632	0.609128	NA	NA	NA	NA	NA	NA	NA	NA	NA	NA	NA	NA	NA	NA	NA	NA	NA	NA	NA	NA	NA
D-dichotoma_M_contig5780.16579.1	OG0009565	0	0	0	0	0	0	2.02518	0	2.62933	4.87041	4.40844	3.16609	0	0.838041	0	0	0	0	0	0	0	0	0	0	0	0.281597	0	NA	NA	NA	NA	NA	NA	NA	NA	NA	NA	NA	NA	NA	NA	NA	NA	NA	NA	NA	NA	NA
D-dichotoma_M_contig5793.16591.1	OG0000003	0	0	0	0	0	0	0	0	0	0	0	0	0	0	0	0	0	0	0.483315	0	0	0	0.428685	1.88979	2.24091	1.19739	0.838351	NA	NA	NA	NA	NA	NA	NA	NA	NA	NA	NA	NA	NA	NA	NA	NA	NA	NA	NA	NA	NA
D-dichotoma_M_contig5805.16649.1	OG0009566	0	0	0	0	0	0	0	0	0	5.55175	6.35656	5.35334	6.53323	4.98719	3.22812	2.81295	4.68873	6.41187	0.6753	2.72111	4.16547	5.51595	2.92108	4.84472	4.73459	3.80037	4.35314	turquoise	-0.595497	0.099408	0.495633	-0.31676	-0.00157307	0.293697	0.485174	0.323474	0.627678	0.581255	0.00104901	0.621785	0.00856518	0.107438	0.993787	0.137042	0.0103129	0.0997882	0.000456956	0.00147478
D-dichotoma_M_contig5810.16656.1	OG0009567	2.67116	0	0	0	0	0	4.98661	3.42606	0	2.17994	0	0	1.28187	2.30396	2.07235	2.16034	0.536773	1.81737	2.47935	2.61971	1.14426	1.51849	1.02717	1.48742	0.302097	0.719506	1.0361	NA	NA	NA	NA	NA	NA	NA	NA	NA	NA	NA	NA	NA	NA	NA	NA	NA	NA	NA	NA	NA
D-dichotoma_M_contig5813.16657.1	OG0009568	2.67116	0	0	0	0	0	0	0	2.62933	3.01127	3.47482	4.63971	6.9047	4.0663	3.40832	2.84997	1.23399	3.67587	5.96999	6.06623	1.93512	3.14285	6.70196	4.70204	6.36272	4.80439	4.40772	turquoise	-0.566069	0.104879	0.558508	-0.389721	-0.341034	0.256794	0.450276	0.396965	0.715729	0.326628	0.00208571	0.602633	0.00246358	0.0444863	0.0817123	0.196007	0.0184318	0.0403451	2.70347e-05	0.0963399
D-dichotoma_M_contig5813.16658.1	OG0009569	0	0	0	0	0	0	0	0	0	0	0	0	7.33603	1.03574	0.918746	1.67433	1.79866	2.21609	5.35735	4.84525	0	1.31727	5.72993	3.41898	5.0303	3.23359	1.95953	yellow	-0.492184	-0.115732	0.397488	-0.56721	-0.538505	0.29804	0.387405	0.343373	0.718655	-0.0360506	0.00911171	0.565398	0.0400583	0.00203325	0.00375798	0.13106	0.0458792	0.0795071	2.41793e-05	0.858316
D-dichotoma_M_contig74.18248.1	OG0009570	1.88155	0	2.38634	0	0	0	2.8361	4.35734	0	3.01127	3.47482	0	6.09848	5.52848	6.41042	7.1026	7.14823	6.53043	6.48453	6.35752	5.00293	6.01748	6.74448	6.78608	6.05935	6.77936	6.45419	yellow	-0.754031	0.0683537	0.681211	-0.594481	-0.206354	0.182299	0.390025	0.512799	0.920175	0.0374307	5.57467e-06	0.734786	9.17046e-05	0.00107538	0.301755	0.362775	0.0443063	0.00623607	1.12294e-11	0.852949
D-dichotoma_M_contig1032.358.1	OG0009571	4.09662	4.45696	3.24132	5.84729	4.45286	3.38293	4.83965	4.35734	4.44292	5.03484	5.68902	6.33559	2.69768	4.74033	3.91356	4.56363	3.81465	4.1333	3.02913	3.63358	2.73296	2.72132	2.66973	3.59081	3.46155	3.58406	2.05381	yellow	0.351669	0.134483	-0.303548	0.530451	0.174757	0.0255986	-0.0589859	-0.257629	-0.544463	0.460686	0.0720483	0.503638	0.123749	0.0044228	0.383299	0.899146	0.770095	0.194506	0.00332275	0.0155941
D-dichotoma_M_contig1034.378.1	OG0009572	8.95905	9.2747	8.87757	4.16764	0	0	9.56871	8.74797	8.7534	9.42965	9.04203	8.45922	2.64362	3.45635	5.04688	3.84126	2.05487	3.05184	6.27809	5.06367	4.0991	3.69326	1.91382	0.293353	0.551757	0.517103	0.336476	blue	0.037638	0.745438	0.193907	0.895729	0.518273	-0.703537	-0.617513	0.0209177	-0.595186	0.132927	0.852143	8.13509e-06	0.332479	2.7659e-10	0.00561659	4.24319e-05	0.000599928	0.917519	0.00105702	0.508631
D-dichotoma_M_contig1035.385.1	OG0009573	4.6532	3.52119	0	2.73491	0	0	4.27966	2.5544	2.62933	9.03243	8.66434	8.08846	1.75954	2.91906	2.07235	1.29933	3.03766	0.356693	2.19584	0.740931	1.38613	1.51849	2.26486	2.27299	1.2616	1.75315	0.609128	brown	0.0674655	0.512546	0.135068	0.660434	0.430864	-0.179044	0.0453541	0.0228829	-0.34287	0.739881	0.738112	0.00626607	0.501766	0.000177521	0.0248536	0.371553	0.822267	0.9098	0.079977	1.03073e-05
D-dichotoma_M_contig1035.387.1	OG0009574	1.88155	0	0	0	0	0	2.02518	0	0	0	0	0	0	0.336329	0	0	0	0	0	0	0	0	0	0	0.302097	0	0	NA	NA	NA	NA	NA	NA	NA	NA	NA	NA	NA	NA	NA	NA	NA	NA	NA	NA	NA	NA	NA
D-dichotoma_M_contig1036.392.1	OG0009575	6.30116	7.10071	7.0907	11.2252	8.78103	11.3096	6.98741	7.2019	7.90461	7.07886	8.25048	7.58816	8.019	7.28203	8.01316	7.93239	7.70586	8.02176	7.69168	7.90669	6.95946	7.4059	7.61834	7.69884	7.71065	7.58148	7.09592	blue	0.598512	-0.815838	-0.794145	-0.346615	-0.468607	0.681741	0.168116	-0.104916	-0.228629	0.0189976	0.000974033	2.15148e-07	7.62931e-07	0.0765244	0.013685	9.01113e-05	0.401912	0.602504	0.251361	0.925068
D-dichotoma_M_contig1734.4954.1	OG0009576	0	0	2.38634	8.56997	8.38974	7.63713	2.02518	0	0	2.17994	0	0	0	0	0	2.03736	0.293208	0	0	0	2.21131	1.31727	0.428685	0	0	0	1.6329	turquoise	0.765012	-0.774996	-0.934061	-0.18287	-0.228078	0.497819	-0.00843695	-0.513372	-0.440041	-0.12583	3.36199e-06	2.07264e-06	1.11188e-12	0.361248	0.252536	0.0082331	0.966685	0.00616867	0.0216224	0.531717
D-dichotoma_M_contig1734.4959.1	OG0009577	0	0	0	6.76137	5.41954	4.31207	2.02518	2.5544	0	2.17994	3.47482	3.16609	0	0	0	0	2.05487	0	0.483315	0	0	0.804027	0.230207	2.77876	1.2616	1.32698	3.10725	turquoise	0.785495	-0.571447	-0.787604	-0.00454383	-0.0937205	0.495419	0.226266	-0.439227	-0.439082	0.275713	1.21317e-06	0.00184827	1.08561e-06	0.982055	0.641954	0.00859818	0.256429	0.0218944	0.0219429	0.16392
D-dichotoma_M_contig1734.4960.1	OG0009578	1.88155	0	0	7.26438	5.99322	6.42437	2.02518	0	0	0	0	0	0	0	0.439558	0.449203	0	0.642448	0	0	0	0	0	1.70259	1.11415	2.08171	2.05381	turquoise	0.821516	-0.805521	-0.90818	-0.246538	-0.358673	0.526398	0.124481	-0.414	-0.363281	-0.184509	1.50301e-07	4.00558e-07	6.04747e-11	0.215096	0.0661794	0.00479355	0.53616	0.0318093	0.0625252	0.356885
D-dichotoma_M_contig197.6102.1	OG0009579	3.55322	4.45696	4.46868	2.73491	6.40259	0	2.02518	3.96558	4.04982	0	4.40844	4.63971	4.9006	4.71171	4.98332	6.21412	6.26579	5.17237	5.25582	5.66314	4.86991	5.15735	4.86787	5.09366	5.01998	5.61028	5.45335	yellow	-0.54053	0.00302437	0.387071	-0.443529	-0.0796034	0.0787699	0.156273	-0.0991992	0.549535	-0.158122	0.00360489	0.988055	0.0460827	0.020488	0.693074	0.696137	0.436335	0.622521	0.00298695	0.43086
D-dichotoma_M_contig198.6146.1	OG0009580	3.55322	5.73892	3.24132	8.96241	10.7956	7.1546	4.27966	0	5.0056	5.18244	0	4.0834	0	0	0	0.242014	0	0	0.844711	0.533566	0	0	0	1.79923	0.551757	0.517103	1.20998	turquoise	0.856791	-0.396664	-0.849302	0.273219	-0.054906	0.137376	-0.178864	-0.654351	-0.735777	-0.104919	1.1729e-08	0.0405108	2.12565e-08	0.167921	0.785618	0.494418	0.372041	0.000213383	1.22302e-05	0.602493
D-dichotoma_M_contig198.6147.1	OG0009581	3.85035	2.64168	2.38634	8.1775	11.114	7.1546	4.03141	0	4.44292	6.08949	0	0	0	0	0	0.242014	1.70204	0	0.261803	0.29131	0	0	0.603131	0.537017	0.76452	0.517103	0	turquoise	0.806269	-0.483628	-0.863614	0.154766	-0.1353	0.2204	-0.127336	-0.663325	-0.642553	-0.130944	3.83373e-07	0.0105949	6.62305e-09	0.440829	0.501024	0.269291	0.526777	0.00016242	0.00030149	0.515032
D-dichotoma_M_contig2099.6827.1	OG0009582	0	0	0	0	0	0	0	0	0	0	0	0	0	0	0	0.449203	0	0	0	0	0	1.08335	0	0	0	0	0	NA	NA	NA	NA	NA	NA	NA	NA	NA	NA	NA	NA	NA	NA	NA	NA	NA	NA	NA	NA	NA
D-dichotoma_M_contig2101.6876.1	OG0009583	4.93224	0	2.38634	4.56247	0	0	4.67601	0	0	3.01127	4.97057	0	0.308699	1.63242	0	0.791248	0	0.642448	0.483315	0	0.488969	0.804027	1.35447	0.293353	1.39536	0.719506	0.336476	NA	NA	NA	NA	NA	NA	NA	NA	NA	NA	NA	NA	NA	NA	NA	NA	NA	NA	NA	NA	NA
D-dichotoma_M_contig2102.6880.1	OG0009584	0	0	0	0	0	0	0	0	0	0	0	0	0	0	0	0	0	0	0	0	0	0	0	0	0	0	0	NA	NA	NA	NA	NA	NA	NA	NA	NA	NA	NA	NA	NA	NA	NA	NA	NA	NA	NA	NA	NA
D-dichotoma_M_contig1516.3672.1	OG0000335	6.19942	6.11119	5.5702	9.71126	10.5362	9.30592	6.09907	6.47145	7.08611	6.78754	6.16643	6.8159	4.1651	4.19595	4.69673	4.52981	4.85523	3.70719	4.43919	3.99922	2.97425	3.0806	4.63659	3.61756	4.0936	4.00789	3.49109	turquoise	0.865588	-0.375473	-0.882228	0.34803	-0.0735121	0.167566	-0.141358	-0.629301	-0.819001	0.0251625	5.58142e-09	0.0536094	1.1749e-09	0.0752506	0.71556	0.403475	0.481865	0.000437142	1.76448e-07	0.900856
D-dichotoma_M_contig1517.3677.1	OG0009585	0	0	0	0	0	0	0	0	0	0	0	0	0	0	0	0	0	0	0	0	0.853502	0	0	0	0	0	0	NA	NA	NA	NA	NA	NA	NA	NA	NA	NA	NA	NA	NA	NA	NA	NA	NA	NA	NA	NA	NA
D-dichotoma_M_contig1518.3678.1	OG0009586	0	0	0	0	0	0	0	0	0	0	0	0	0	0	0	0	0	0	0	0	0	0	0	0	0	0	0	NA	NA	NA	NA	NA	NA	NA	NA	NA	NA	NA	NA	NA	NA	NA	NA	NA	NA	NA	NA	NA
D-dichotoma_M_contig1519.3686.1	OG0009587	8.08829	8.01004	8.33249	14.993	13.595	14.5624	9.5861	7.42289	8.70041	6.87694	6.35656	6.91458	5.43398	3.34893	6.90649	3.89538	1.97442	4.40566	7.59255	7.01107	4.53538	4.15253	6.28835	7.63808	3.63387	8.62652	6.68899	green	0.931957	-0.499616	-0.861856	0.149458	-0.21266	0.21475	-0.169735	-0.46196	-0.661828	-0.16797	1.62774e-12	0.00796838	7.69555e-09	0.456843	0.286889	0.282068	0.397328	0.0152728	0.000170091	0.402326
D-dichotoma_M_contig1522.3717.1	OG0009588	0	0	0	0	0	0	0	0	0	0	0	0	0	0	0	0	0	0	0	0	0	0	0	0	0	0	0	NA	NA	NA	NA	NA	NA	NA	NA	NA	NA	NA	NA	NA	NA	NA	NA	NA	NA	NA	NA	NA
D-dichotoma_M_contig213.7012.1	OG0009589	6.48535	7.3983	7.54724	12.2686	12.0652	12.0865	7.08851	6.82155	8.68231	8.4537	9.01407	9.20758	9.82333	8.85509	9.34701	9.78833	9.41277	9.63237	9.3845	9.58458	9.47464	9.10239	9.3072	9.23935	9.05994	9.4627	9.5126	blue	0.358487	-0.92516	-0.654451	-0.667785	-0.510969	0.905327	0.36972	-0.244386	0.137576	0.135426	0.0663306	5.15513e-12	0.000212742	0.000141344	0.00645566	8.72561e-11	0.0576833	0.219255	0.493783	0.500624
D-dichotoma_M_contig213.7017.1	OG0009590	9.12085	8.52294	8.90327	8.25968	7.20261	7.63713	9.28609	8.71488	9.0919	9.16259	8.73456	8.21002	9.72629	9.70261	9.18782	8.84543	8.2644	9.41546	9.56398	9.44474	9.61411	9.33598	9.06216	9.44283	9.41532	8.44123	8.48262	turquoise	-0.732453	0.468591	0.742445	-0.0680711	-0.112813	-0.280817	-0.104882	0.589968	0.534583	-0.0289322	1.40161e-05	0.0136886	9.2477e-06	0.735844	0.575308	0.15594	0.60262	0.00119956	0.00407024	0.886091
D-dichotoma_M_contig214.7049.1	OG0009591	1.88155	2.64168	2.38634	0	0	0	3.35209	2.5544	3.50777	2.17994	0	4.63971	3.29688	4.13258	4.01239	5.58862	5.40058	3.43524	4.04615	4.24032	3.04648	4.40198	4.46639	4.63815	4.01264	5.04001	4.11149	turquoise	-0.739743	0.339527	0.775668	-0.296481	0.107016	-0.0902086	0.281572	0.493462	0.736111	-0.00206012	1.03672e-05	0.0831586	2.00454e-06	0.133184	0.595219	0.654534	0.154784	0.00890581	1.20626e-05	0.991863
D-dichotoma_M_contig214.7050.1	OG0009592	0	2.64168	2.38634	0	0	0	4.27966	0	4.04982	3.53532	0	3.16609	3.1495	5.02258	3.38391	4.85521	4.34916	4.08643	3.82094	3.85051	3.11526	3.14285	3.98898	4.50122	4.0936	4.49531	4.19662	NA	NA	NA	NA	NA	NA	NA	NA	NA	NA	NA	NA	NA	NA	NA	NA	NA	NA	NA	NA	NA
D-dichotoma_M_contig215.7110.1	OG0009593	0	0	0	8.50406	9.47492	7.24708	0	0	0	0	0	0	0	0	0	0	0	0	0	0	0	0	0.230207	0	0	0.896975	0.336476	turquoise	0.78489	-0.842574	-0.974085	-0.247304	-0.386023	0.57368	0.0612887	-0.583138	-0.415343	-0.134816	1.25222e-06	3.53125e-08	1.17645e-17	0.213627	0.0467263	0.00175674	0.76137	0.00141108	0.0312035	0.502571
D-dichotoma_M_contig215.7113.1	OG0009594	0	0	0	9.70149	9.38759	8.14953	0	0	0	2.17994	0	0	0	0	0	0	0	0	0	0	0	0	0	0	0	0	0	turquoise	0.797269	-0.81145	-0.977545	-0.189593	-0.372076	0.565647	0.051099	-0.541837	-0.451599	-0.0728472	6.41768e-07	2.81533e-07	1.99874e-18	0.343553	0.0559864	0.00210539	0.800176	0.00350895	0.0180493	0.718029
D-dichotoma_M_contig1388.2853.1	OG0009595	0	0	2.38634	0	0	3.38293	0	0	0	3.9189	3.47482	3.16609	3.58197	3.9729	2.13218	2.61212	2.51919	1.2645	1.13347	1.59157	0.488969	1.08335	5.6073	5.33842	5.26688	4.98215	4.13324	pink	-0.221391	-0.0626002	0.287146	-0.335599	-0.182011	0.373773	0.83432	0.339597	0.519868	0.436565	0.267091	0.756414	0.146434	0.0870176	0.363547	0.054789	6.38023e-08	0.0830906	0.00544621	0.0228035
D-dichotoma_M_contig1388.2859.1	OG0009596	0	0	0	9.21675	8.91199	7.76775	0	0	0	2.17994	0	0	0	0	0	0	0	0	0	0	0	0	0.230207	0.927471	0	0	0	turquoise	0.79851	-0.815489	-0.973003	-0.199539	-0.388953	0.575972	0.0746321	-0.536326	-0.437626	-0.0670126	5.98683e-07	2.19851e-07	1.95029e-17	0.31835	0.0449443	0.0016669	0.711408	0.00392886	0.0224376	0.73981
D-dichotoma_M_contig1389.2862.1	OG0009597	0	0	0	0	0	0	0	0	0	0	0	0	0	0	0	0.242014	0	0	0	0	0	0	0	0	0	0	0	NA	NA	NA	NA	NA	NA	NA	NA	NA	NA	NA	NA	NA	NA	NA	NA	NA	NA	NA	NA	NA
D-dichotoma_M_contig1390.2896.1	OG0009598	0	0	0	6.83471	0	5.27529	0	0	0	2.17994	3.47482	0	0	0	0	0	0	0	0	0	0.488969	0	0	0	0	0	0	turquoise	0.656467	-0.528913	-0.70024	0.00181493	-0.142896	0.44019	0.0671422	0.0397965	-0.422838	0.219289	0.000200244	0.00456051	4.77511e-05	0.992832	0.477063	0.0215729	0.739324	0.843764	0.0279912	0.271775
D-dichotoma_M_contig1390.2897.1	OG0009599	0	2.64168	4.16295	9.78712	8.47695	10.5053	4.4914	2.5544	5.85951	5.43883	5.37406	4.63971	0	0	1.27784	0.791248	0	0.356693	2.52993	1.48027	0.488969	0	0.899188	2.62904	0.302097	4.22298	4.88903	green	0.938158	-0.455686	-0.836381	0.210188	0.0168528	0.306862	-0.0168308	-0.445405	-0.665416	0.171502	5.09998e-13	0.0169085	5.5208e-08	0.292661	0.933508	0.119497	0.933595	0.0198984	0.000152216	0.392359
D-dichotoma_M_contig1391.2899.1	OG0009600	8.95905	8.88463	8.98981	0	0	0	9.16012	8.37699	9.13247	8.42434	8.4305	8.00132	6.3722	7.14959	6.80445	6.75527	6.56949	7.3817	7.46999	7.33676	5.07377	6.54689	6.97425	6.89941	7.29523	6.88574	5.43595	blue	-0.568941	0.962717	0.836213	0.553344	0.45065	-0.739012	-0.22467	0.375657	0.0925312	0.114373	0.00195585	1.04362e-15	5.58678e-08	0.00275419	0.0183231	1.069e-05	0.259888	0.0534828	0.646204	0.570003
D-dichotoma_M_contig1391.2900.1	OG0009601	4.49042	0	2.38634	5.69807	0	0	4.67601	2.5544	0	4.22163	0	3.16609	3.98118	4.08873	3.52451	5.64236	4.78621	5.12677	4.76897	4.44684	3.95642	4.3763	5.30037	5.22992	5.42386	4.77061	3.34956	yellow	-0.47751	-0.0259263	0.415143	-0.43847	-0.269588	0.212099	0.307149	0.51632	0.666091	-0.0114618	0.0117747	0.897861	0.0312931	0.0221498	0.173872	0.288194	0.119134	0.00583133	0.000149048	0.954752
D-dichotoma_M_contig1391.2901.1	OG0009602	1.88155	0	3.77451	0	0	0	2.8361	0	2.62933	0	3.47482	0	0	0.336329	0.236455	0.242014	0	0.356693	0.6753	0.29131	0.853502	0	0.230207	0.745413	0.949901	0	0	NA	NA	NA	NA	NA	NA	NA	NA	NA	NA	NA	NA	NA	NA	NA	NA	NA	NA	NA	NA	NA
D-dichotoma_M_contig1601.4209.1	OG0009603	0	0	0	6.60247	7.39403	4.31207	0	0	0	0	0	0	0	0	0	0	0	0	0	0	0	0	0	0	0	0	0.609128	turquoise	0.767417	-0.820861	-0.960723	-0.23502	-0.379873	0.558174	0.0496822	-0.625652	-0.413555	-0.131646	2.99871e-06	1.56745e-07	1.98008e-15	0.237988	0.0506478	0.00248153	0.805611	0.000482795	0.032012	0.512763
D-dichotoma_M_contig1601.4211.1	OG0009604	5.5435	5.42373	5.43573	5.34342	5.99322	6.25655	6.76108	5.63641	6.30033	7.18771	7.05022	7.32663	5.48098	6.34585	5.76629	6.85424	6.3834	6.32369	6.26695	6.47103	6.73197	6.45174	6.58464	6.44891	6.499	6.71273	6.80198	grey	-0.183593	0.159295	0.271822	0.00244502	0.333411	0.264282	0.310655	0.110512	0.277423	0.772914	0.359319	0.427403	0.170194	0.990343	0.0892251	0.182828	0.114764	0.583175	0.161215	2.29718e-06
D-dichotoma_M_contig1602.4218.1	OG0009605	0	0	0	0	0	0	0	0	0	0	0	0	0	0	0	0	0	0	0	0	0	0	0	0	0	0	0	NA	NA	NA	NA	NA	NA	NA	NA	NA	NA	NA	NA	NA	NA	NA	NA	NA	NA	NA	NA	NA
D-dichotoma_M_contig1605.4229.1	OG0000650	7.16279	6.86162	6.94978	0	7.71425	5.27529	6.677	6.30356	6.97152	6.01267	5.94738	6.47146	8.71166	8.47661	8.22977	8.33702	9.00351	8.33539	8.4214	8.00798	7.06755	7.89161	9.01276	8.59798	8.69346	8.78506	7.94907	turquoise	-0.708029	0.278744	0.668054	-0.314519	-0.0728679	-0.0941795	0.234267	0.0877416	0.668942	-0.0682682	3.60326e-05	0.159147	0.000140154	0.110085	0.717952	0.640317	0.239537	0.663427	0.000136289	0.735106
D-dichotoma_M_contig1605.4232.1	OG0009606	2.67116	3.52119	2.38634	0	0	0	0	0	0	6.01267	5.37406	3.16609	0	1.20958	0.236455	1.18808	0	0.642448	0.483315	0.533566	0.853502	1.85235	0.603131	0.745413	1.6306	0	0	brown	-0.0290748	0.493726	0.160465	0.588023	0.408164	-0.275434	-0.0772843	-0.0347545	-0.318266	0.532344	0.885533	0.00886383	0.423974	0.00125679	0.0345521	0.164364	0.701607	0.863362	0.105686	0.00425816
D-dichotoma_M_contig4167.13571.1	OG0009607	0	0	0	0	0	0	0	0	0	0	0	0	3.79534	4.2367	2.29809	1.83066	3.18793	1.92785	3.22605	2.90473	1.59321	1.69506	4.03538	3.35683	3.66069	2.57468	2.30452	NA	NA	NA	NA	NA	NA	NA	NA	NA	NA	NA	NA	NA	NA	NA	NA	NA	NA	NA	NA	NA
D-dichotoma_M_contig4176.13586.1	OG0009608	7.43314	7.82238	8.27457	0	0	0	7.53314	7.81516	7.84075	8.49665	8.38756	8.42615	8.77903	8.84112	8.46536	8.30321	8.48915	8.2529	8.06516	8.07893	9.1411	8.73792	8.33984	8.51505	8.73507	8.1277	8.8227	turquoise	-0.830659	0.783153	0.985641	0.144406	0.369643	-0.488456	0.0405378	0.530685	0.511712	0.180502	8.21023e-08	1.37059e-06	7.8024e-21	0.472368	0.0577396	0.009735	0.84089	0.0044022	0.00636566	0.367606
D-dichotoma_M_contig4178.13589.1	OG0009609	1.88155	0	0	2.73491	0	0	0	0	0	0	0	0	3.6926	4.33381	2.7818	3.41685	3.47784	4.03798	4.13052	4.43197	3.83931	4.15253	3.82255	3.94776	3.71288	2.94143	3.82104	NA	NA	NA	NA	NA	NA	NA	NA	NA	NA	NA	NA	NA	NA	NA	NA	NA	NA	NA	NA	NA
D-dichotoma_M_contig4179.13591.1	OG0009610	3.17858	4.06365	0	7.26438	9.97183	6.83521	5.11997	4.35734	5.0056	5.84553	4.97057	5.04021	2.69768	4.11082	3.77027	4.18336	3.22317	3.39733	3.88062	3.82795	4.43132	3.51646	3.3944	4.21629	2.91115	2.72335	3.52441	turquoise	0.660067	-0.543613	-0.786752	0.000543209	-0.172713	0.489581	0.0102048	-0.651588	-0.432617	0.252512	0.000179521	0.00338206	1.13562e-06	0.997854	0.388974	0.0095433	0.95971	0.000231675	0.0242077	0.20383
D-dichotoma_M_contig4180.13597.1	OG0009611	5.5435	2.64168	2.38634	7.55218	8.09117	4.87262	7.53314	4.91865	4.04982	7.15233	6.16643	5.35334	9.282	10.6623	9.15169	9.07773	8.48007	9.08529	9.0806	8.86543	8.67979	8.44243	9.0391	9.45261	9.37489	8.57852	8.49423	yellow	-0.468268	-0.351273	0.249285	-0.767624	-0.497618	0.621895	0.537255	0.191028	0.848064	0.194431	0.0137625	0.0723914	0.209865	2.96917e-06	0.00826324	0.000534114	0.00385518	0.339846	2.3379e-08	0.331148
D-dichotoma_M_contig4186.13603.1	OG0009612	0	0	0	0	0	0	0	0	0	2.17994	0	0	3.66573	3.79332	3.38391	3.9979	3.47784	0	0	0	0	0	5.29402	4.856	4.24306	4.41012	4.1758	NA	NA	NA	NA	NA	NA	NA	NA	NA	NA	NA	NA	NA	NA	NA	NA	NA	NA	NA	NA	NA
D-dichotoma_M_contig4186.13604.1	OG0009613	0	0	0	2.73491	4.45286	0	0	0	0	2.17994	0	0	5.04313	4.95092	4.04389	4.29496	4.44183	0	0	0	0	0	6.16507	5.17695	5.05072	4.9321	5.08038	pink	-0.15073	-0.345908	0.0685411	-0.58403	-0.358548	0.486268	0.895363	-0.00663457	0.569579	0.0739318	0.452977	0.0771675	0.734084	0.00138172	0.0662808	0.0101172	2.88369e-10	0.9738	0.00192793	0.714003
D-dichotoma_M_contig4193.13613.1	OG0009614	0	0	0	0	0	0	2.02518	0	0	3.01127	0	0	2.03621	2.05328	1.04863	0.935998	0.536773	1.08539	3.13094	2.94721	0.853502	0.804027	3.13507	1.23445	1.73524	1.92676	0.838351	NA	NA	NA	NA	NA	NA	NA	NA	NA	NA	NA	NA	NA	NA	NA	NA	NA	NA	NA	NA	NA
D-dichotoma_M_contig4193.13614.1	OG0009615	0	0	0	0	0	0	0	0	0	0	0	0	0.778857	0.838041	0.617565	0.791248	0	0.880852	0.6753	0.922202	0	0	0.428685	0.537017	1.11415	0.281597	0.609128	NA	NA	NA	NA	NA	NA	NA	NA	NA	NA	NA	NA	NA	NA	NA	NA	NA	NA	NA	NA	NA
D-dichotoma_M_contig4193.13616.1	OG0009616	4.30692	2.64168	3.24132	0	0	0	3.35209	0	3.50777	4.22163	4.40844	3.16609	6.40912	4.96311	5.30912	2.84997	3.32401	6.19151	5.54734	4.76442	3.04648	3.85074	4.22082	4.93256	6.20312	2.52152	3.01651	turquoise	-0.752057	0.412019	0.739664	-0.143788	-0.222816	-0.0845909	0.151449	0.450115	0.617771	0.179241	6.08829e-06	0.0327202	1.04016e-05	0.474287	0.263945	0.674849	0.4508	0.018479	0.000595872	0.371017
D-dichotoma_M_contig208.6756.1	OG0009617	0	0	0	0	0	0	4.27966	0	2.62933	3.01127	4.40844	0	0	0	0	0	0	0	0	0	0	0	0	1.48742	0.76452	0	0	NA	NA	NA	NA	NA	NA	NA	NA	NA	NA	NA	NA	NA	NA	NA	NA	NA	NA	NA	NA	NA
D-dichotoma_M_contig208.6759.1	OG0009618	5.62424	5.58992	4.16295	0	0	0	5.45897	6.00821	4.75152	5.18244	5.94738	5.35334	4.85375	4.52691	5.54752	4.73173	5.34567	4.78902	5.31471	5.07329	3.71185	4.15253	5.32548	5.14971	5.20445	4.9321	4.66836	turquoise	-0.675269	0.870028	0.910913	0.348123	0.349508	-0.569655	-0.0119543	0.461685	0.314796	0.205167	0.000111357	3.76074e-09	4.20819e-11	0.0751671	0.073937	0.00192464	0.952809	0.0153417	0.109756	0.304605
D-dichotoma_M_contig208.6760.1	OG0009619	5.90842	4.45696	5.43573	4.16764	5.41954	4.87262	5.24204	4.66512	5.22156	5.43883	3.47482	4.0834	4.56475	3.82038	5.30263	4.6915	4.6374	4.15617	5.35033	4.95339	3.04648	3.46866	5.22229	5.26418	5.24046	4.28809	4.25732	grey	0.223449	0.0848103	-0.0959907	0.190663	-0.315827	-0.153937	0.00383221	-0.221674	-0.18665	-0.273311	0.262555	0.674052	0.633873	0.340786	0.108535	0.443308	0.984865	0.266463	0.351234	0.167772
D-dichotoma_M_contig4598.14492.1	OG0009620	0	0	0	0	0	0	0	0	0	0	0	0	2.52902	3.14994	1.27784	3.44131	3.61684	6.2982	5.27077	5.2868	5.1247	4.69988	3.85741	4.81035	5.19531	3.44822	2.05381	yellow	-0.708071	-0.135631	0.500718	-0.71363	-0.359297	0.295474	0.168634	0.415871	0.87988	-0.0755827	3.59765e-05	0.49997	0.00780955	2.92626e-05	0.0656752	0.13457	0.400443	0.0309681	1.48401e-09	0.707889
D-dichotoma_M_contig4599.14496.1	OG0009621	0	0	0	0	0	0	0	0	0	0	0	0	0	0.838041	0.236455	0	0	0	0.261803	0	0	0	0.428685	0	0.302097	0.719506	0	NA	NA	NA	NA	NA	NA	NA	NA	NA	NA	NA	NA	NA	NA	NA	NA	NA	NA	NA	NA	NA
D-dichotoma_M_contig4599.14497.1	OG0009622	1.88155	0	0	0	0	0	2.8361	0	2.62933	2.17994	4.40844	5.04021	5.01147	5.38176	4.47205	4.58574	3.74361	4.87427	4.22565	3.89458	4.13267	3.95851	5.30037	5.06479	4.8322	4.49531	3.94923	NA	NA	NA	NA	NA	NA	NA	NA	NA	NA	NA	NA	NA	NA	NA	NA	NA	NA	NA	NA	NA
D-dichotoma_M_contig4601.14518.1	OG0009623	0	0	0	2.73491	0	0	0	0	0	0	0	0	0	0.336329	0	0	1.79866	0	0	0	0	0	0.230207	0	0	0	0	NA	NA	NA	NA	NA	NA	NA	NA	NA	NA	NA	NA	NA	NA	NA	NA	NA	NA	NA	NA	NA
D-dichotoma_M_contig4605.14522.1	OG0009624	4.09662	2.64168	2.38634	0	0	0	4.4914	3.42606	5.40936	5.31632	4.97057	4.63971	5.33512	5.38176	5.27635	4.80896	4.66329	3.09983	5.99271	5.89237	2.33182	1.31727	6.64823	5.98262	6.15677	5.57157	5.56162	turquoise	-0.554618	0.526031	0.760462	0.0107172	0.0112036	-0.11708	0.409048	0.451182	0.541561	0.353193	0.0026799	0.00482841	4.15909e-06	0.957688	0.95577	0.560847	0.0341251	0.0181691	0.00352904	0.0707379
D-dichotoma_M_contig4607.14525.1	OG0009625	3.55322	0	0	6.10614	0	0	2.02518	0	0	3.53532	0	3.16609	3.77033	4.08873	3.61117	3.72651	2.9137	3.67587	5.17867	5.11114	2.21131	3.25982	2.62996	2.40169	2.95515	1.84257	2.22569	yellow	-0.340666	-0.186885	0.196691	-0.446075	-0.432791	0.402908	0.191993	0.417939	0.538148	0.100949	0.082064	0.350618	0.325447	0.0196912	0.0241445	0.0371817	0.337364	0.0300589	0.00378552	0.616365
D-dichotoma_M_contig4612.14538.1	OG0009626	0	0	0	0	0	0	0	0	0	0	0	0	0.562846	0	0	0.242014	0	0	0.261803	0.533566	0	0.457315	0	0.537017	0.302097	0	0.336476	NA	NA	NA	NA	NA	NA	NA	NA	NA	NA	NA	NA	NA	NA	NA	NA	NA	NA	NA	NA	NA
D-dichotoma_M_contig4614.14543.1	OG0009627	1.88155	0	0	0	0	0	2.02518	0	0	3.01127	0	0	5.44192	4.52691	3.50201	4.0624	4.66329	3.79727	4.74776	5.03442	3.11526	3.14285	5.58667	4.90024	5.59353	4.48145	1.75018	yellow	-0.721944	-0.0256298	0.582573	-0.628867	-0.420553	0.292768	0.449766	0.46027	0.91393	0.026769	2.12942e-05	0.899024	0.00142991	0.000442363	0.0289411	0.138346	0.0185811	0.0157001	2.7817e-11	0.894559
D-dichotoma_M_contig5232.15724.1	OG0009628	6.39619	4.06365	6.00954	12.117	9.59675	10.6048	6.33684	3.42606	0	6.48033	4.40844	3.16609	7.711	9.2951	7.95326	6.78425	6.93894	7.48696	2.47935	3.02858	7.80281	7.74129	7.79055	7.94575	8.16864	7.0867	6.88127	blue	0.226659	-0.720285	-0.467221	-0.56811	-0.451858	0.584212	0.461111	-0.0775408	0.182484	-0.134407	0.255581	2.27088e-05	0.0140044	0.00199266	0.0179752	0.00137581	0.0154862	0.700661	0.362279	0.503882
D-dichotoma_M_contig5232.15725.1	OG0009629	7.3876	2.64168	3.24132	15.2365	13.2467	12.7216	6.58771	3.96558	3.50777	7.82659	3.47482	4.63971	8.2136	9.50514	8.59991	8.34433	8.01074	8.41816	3.22605	3.28189	8.05342	8.16905	8.75703	8.93154	8.92472	8.22132	7.86053	blue	0.361305	-0.830567	-0.611848	-0.583263	-0.484273	0.699739	0.470098	-0.210302	0.119881	-0.0755196	0.0640726	8.262e-08	0.000695424	0.00140692	0.0104764	4.86103e-05	0.0133484	0.292394	0.551442	0.708123
D-dichotoma_M_contig5232.15726.1	OG0009630	7.47728	2.64168	4.72082	11.5202	9.08852	9.44907	5.73328	3.42606	8.08079	6.59016	4.40844	4.0834	7.40264	8.57524	7.3603	5.17262	5.39286	6.91274	2.84162	1.96671	5.67318	6.09037	7.10147	7.46108	7.84387	5.66646	5.47907	turquoise	0.39024	-0.609732	-0.558845	-0.315759	-0.428447	0.452686	0.362122	-0.180366	-0.0688259	-0.104998	0.0441789	0.000734342	0.00244556	0.108614	0.0257669	0.01774	0.0634296	0.367973	0.733019	0.602219
D-dichotoma_M_contig5232.15728.1	OG0009631	3.85035	0	3.77451	4.56247	5.99322	4.31207	6.49253	4.35734	2.62933	6.16243	0	4.0834	5.93369	7.40334	5.66864	6.94686	6.54532	6.21893	6.16663	5.87597	5.971	5.82208	7.19982	7.24864	6.81475	6.8267	6.629	yellow	-0.332414	-0.318221	0.192851	-0.668636	-0.408513	0.452115	0.471818	0.148485	0.721372	-0.0366445	0.0902454	0.105737	0.33517	0.000137609	0.0343829	0.0179018	0.0129684	0.459814	2.17724e-05	0.856006
D-dichotoma_M_contig5249.15745.1	OG0009632	0	0	0	3.62227	0	0	0	0	0	0	0	0	0	0	0.236455	0	2.13107	0	0.261803	0.29131	0	0.457315	0.230207	0.293353	0	0.281597	0	NA	NA	NA	NA	NA	NA	NA	NA	NA	NA	NA	NA	NA	NA	NA	NA	NA	NA	NA	NA	NA
D-dichotoma_M_contig5250.15752.1	OG0000061	3.55322	0	3.24132	0	0	0	3.73137	2.5544	0	0	3.47482	0	0	1.36471	1.16778	0.449203	1.88922	0	0.483315	0	1.38613	0	0	0	0.76452	0.281597	0	NA	NA	NA	NA	NA	NA	NA	NA	NA	NA	NA	NA	NA	NA	NA	NA	NA	NA	NA	NA	NA
D-dichotoma_M_contig5252.15754.1	OG0000076	3.55322	0	0	0	0	0	0	0	0	0	3.47482	0	0	0	0	0	0	0.356693	0	0	0	0	0	1.23445	0.302097	0.281597	0	NA	NA	NA	NA	NA	NA	NA	NA	NA	NA	NA	NA	NA	NA	NA	NA	NA	NA	NA	NA	NA
D-dichotoma_M_contig5255.15755.1	OG0009633	0	0	0	0	0	0	0	0	0	0	0	0	0	0	0	0	0	0	0	0	0	0	0	0	0	0	0	NA	NA	NA	NA	NA	NA	NA	NA	NA	NA	NA	NA	NA	NA	NA	NA	NA	NA	NA	NA	NA
D-dichotoma_M_contig5264.15764.1	OG0009634	6.44146	6.49329	5.5702	11.5006	9.55727	10.5239	5.64751	6.11352	6.09669	7.07886	7.43467	7.46331	5.63437	5.06846	5.97266	4.59667	4.33312	6.40234	6.3361	6.35357	5.47805	4.96402	5.75788	5.71798	5.64144	4.66425	5.15673	turquoise	0.816181	-0.599895	-0.910623	0.073163	-0.345922	0.423811	-0.108579	-0.424588	-0.617522	0.0845527	2.10606e-07	0.00094123	4.37569e-11	0.716856	0.0771551	0.0275947	0.589822	0.0272812	0.000599787	0.674988
D-dichotoma_M_contig339.11555.1	OG0000651	7.64146	8.66008	7.64191	6.22001	7.20261	5.58975	7.382	7.9634	7.24255	7.95533	7.59426	8.80626	7.55867	6.19374	7.49743	6.52287	6.44067	6.91274	7.10743	7.09846	7.15999	6.9245	7.38293	6.3286	7.10573	6.23575	6.65179	blue	-0.121255	0.675769	0.262755	0.706243	0.347608	-0.600504	-0.367702	-0.213196	-0.401662	0.170234	0.546857	0.000109569	0.185465	3.84656e-05	0.0756287	0.000927096	0.0591683	0.285648	0.037828	0.395921
D-dichotoma_M_contig340.11594.1	OG0009635	1.88155	0	0	0	0	0	3.35209	0	3.50777	5.31632	3.47482	0	3.33148	5.9398	3.80745	4.07809	3.71913	2.52814	1.58003	2.45287	0.853502	1.51849	5.69663	5.81362	5.15815	4.7243	4.46032	turquoise	-0.430805	0.177898	0.527149	-0.260175	-0.0980896	0.17881	0.675732	0.365446	0.64071	0.347004	0.0248754	0.374672	0.00472298	0.189978	0.626438	0.372188	0.0001097	0.0608636	0.0003178	0.0761725
D-dichotoma_M_contig340.11599.1	OG0009636	0	0	0	0	0	0	0	0	0	2.17994	0	0	0	0	0	0	0	0	0	0	0	0	0	0	0	0	0	NA	NA	NA	NA	NA	NA	NA	NA	NA	NA	NA	NA	NA	NA	NA	NA	NA	NA	NA	NA	NA
D-dichotoma_M_contig340.11600.1	OG0009637	0	0	0	0	0	0	0	2.5544	0	0	0	0	0	0	0	0	0	0	0	0	0	0	0	0	0	0	0	NA	NA	NA	NA	NA	NA	NA	NA	NA	NA	NA	NA	NA	NA	NA	NA	NA	NA	NA	NA	NA
D-dichotoma_M_contig340.11601.1	OG0009638	0	0	0	7.46248	5.99322	5.27529	0	0	0	4.22163	0	3.16609	1.28187	2.96828	2.07235	1.75461	1.48692	0	0	0	0	0	3.82255	3.47856	3.30035	3.80037	4.21714	turquoise	0.577962	-0.717962	-0.644165	-0.368539	-0.374955	0.703122	0.653332	-0.277045	-0.0376301	0.198248	0.00159212	2.483e-05	0.000287824	0.058549	0.0539662	4.30716e-05	0.000219974	0.161809	0.852174	0.321556
D-dichotoma_M_contig341.11627.1	OG0009639	1.88155	0	0	10.2694	8.848	9.19421	5.24204	0	0	2.17994	3.47482	0	2.11778	1.85814	0.776001	1.18808	3.32401	1.2645	2.19584	1.96671	1.14426	0.804027	1.70001	2.62904	0.76452	1.92676	0.609128	turquoise	0.716691	-0.774535	-0.874216	-0.229477	-0.391429	0.625152	0.104444	-0.402452	-0.327996	0.0107956	2.60644e-05	2.12058e-06	2.55702e-09	0.24956	0.0434808	0.000489375	0.604144	0.0374174	0.0948717	0.957379
D-dichotoma_M_contig155.3857.1	OG0009640	0	0	0	3.62227	0	3.38293	0	2.5544	0	2.17994	3.47482	3.16609	7.92014	9.84779	7.60428	8.81006	7.69649	6.78647	10.2033	10.2206	5.7181	5.98387	8.91481	8.83654	6.44216	6.43937	6.48413	yellow	-0.602144	-0.232712	0.429242	-0.76001	-0.467893	0.519482	0.488438	0.520619	0.902017	0.143456	0.00088994	0.242761	0.0254637	4.24676e-06	0.0138487	0.00548702	0.00973818	0.00536756	1.31629e-10	0.47532
D-dichotoma_M_contig155.3867.1	OG0009641	6.19942	5.99745	5.80653	4.87213	4.45286	3.38293	8.1155	6.30356	5.98297	7.32113	4.40844	6.70997	6.13322	7.92985	7.33665	7.02784	6.16064	6.5778	6.62494	6.40018	5.99857	5.48024	6.43978	7.05429	6.29157	5.83935	5.70654	turquoise	-0.561474	0.551907	0.668709	0.114511	0.0270559	-0.274022	0.0983237	0.330997	0.402299	0.090781	0.00230889	0.00284009	0.000137294	0.569534	0.893435	0.166625	0.62561	0.0917098	0.0374965	0.652478
D-dichotoma_M_contig155.3871.1	OG0000652	6.34946	6.11119	6.26884	11.4313	11.7695	11.0261	7.43416	7.15333	6.30033	7.00145	7.34773	7.58816	7.14739	5.40876	6.7241	7.14603	6.72203	6.36355	6.32897	6.46739	6.56988	6.23312	6.08645	6.33264	6.104	6.66756	6.48835	turquoise	0.799718	-0.752575	-0.960152	-0.114241	-0.276616	0.546775	0.0299952	-0.56654	-0.501005	0.0149797	5.59243e-07	5.94964e-06	2.36387e-15	0.570451	0.162487	0.00316587	0.881934	0.00206389	0.00776872	0.940885
D-dichotoma_M_contig526.15759.1	OG0009642	1.88155	2.64168	3.24132	0	0	0	4.4914	3.96558	2.62933	4.68479	0	0	2.80007	1.50476	1.87634	1.18808	0.293208	1.2645	2.47935	1.59157	0.853502	0	3.69346	5.02538	4.34579	4.65194	4.06696	NA	NA	NA	NA	NA	NA	NA	NA	NA	NA	NA	NA	NA	NA	NA	NA	NA	NA	NA	NA	NA
D-dichotoma_M_contig527.15780.1	OG0009643	0	5.01986	3.77451	9.33521	5.41954	9.715	3.73137	3.96558	4.44292	4.22163	6.67497	5.35334	5.8103	5.72746	5.24281	5.92853	5.14895	5.54595	5.6595	6.01723	4.28971	4.32353	5.69663	5.74249	5.1392	5.51149	5.97705	blue	0.365971	-0.71289	-0.513975	-0.470372	-0.396346	0.755138	0.387039	0.0893681	0.0690078	0.233234	0.0604654	3.00876e-05	0.00609833	0.0132871	0.0406864	5.30379e-06	0.0461025	0.657559	0.732339	0.241676
D-dichotoma_M_contig527.15781.1	OG0009644	2.67116	0	0	6.60247	0	7.94386	3.35209	0	0	2.17994	0	0	3.02816	3.45635	2.70508	4.0143	3.03766	3.14627	3.77973	3.89458	2.44304	3.36801	3.78683	3.98932	3.55029	3.63501	3.87369	blue	0.130251	-0.640915	-0.241748	-0.643693	-0.486871	0.60546	0.338175	0.451531	0.386654	-0.122411	0.517279	0.000315953	0.224427	0.000291768	0.0100107	0.000818729	0.0844713	0.0180689	0.046338	0.543013
D-dichotoma_M_contig527.15782.1	OG0009645	0	0	0	7.41545	4.45286	8.3712	0	0	0	3.01127	0	0	4.71647	5.42648	4.50637	4.79953	3.69423	4.53347	4.95631	5.19284	3.18092	3.41921	4.78882	4.97455	4.27812	4.48145	4.88903	blue	0.0800881	-0.842447	-0.333728	-0.871935	-0.689331	0.844904	0.498444	0.154742	0.5106	-0.0528348	0.691296	3.56458e-08	0.0889026	3.16032e-09	6.98279e-05	2.97011e-08	0.0081403	0.440899	0.0065006	0.79353
D-dichotoma_M_contig528.15788.1	OG0009646	4.79946	3.52119	4.16295	0	0	0	3.35209	3.42606	4.75152	0	4.40844	4.63971	0	0	1.04863	0	0	0	0	0	0	0	0.428685	0	0.949901	0	0	NA	NA	NA	NA	NA	NA	NA	NA	NA	NA	NA	NA	NA	NA	NA	NA	NA	NA	NA	NA	NA
D-dichotoma_M_contig1353.2665.1	OG0009647	0	3.52119	3.24132	3.62227	7.20261	5.27529	0	0	0	4.22163	4.40844	4.0834	3.29688	3.9729	4.28702	4.34767	4.48603	4.71391	4.04615	4.66613	2.73296	3.0806	3.57279	4.25087	3.57869	4.18928	2.51804	black	0.0481411	-0.59222	-0.321872	-0.53681	-0.454979	0.750909	0.414615	-0.297947	0.260122	0.288878	0.811532	0.00113611	0.101576	0.0038903	0.0171014	6.40622e-06	0.0315306	0.131186	0.190072	0.143908
D-dichotoma_M_contig1353.2666.1	OG0000653	5.77332	4.76569	5.6932	6.51593	8.19771	6.83521	5.45897	4.91865	0	6.23186	6.52453	6.8159	4.91208	6.18336	5.97266	6.69805	6.49575	6.31355	6.39868	6.23858	4.72338	5.32781	6.31367	6.4377	6.25684	6.09727	4.96379	grey	0.122771	-0.445881	-0.29832	-0.338451	-0.424439	0.586785	0.358711	-0.235154	0.144076	0.242915	0.541819	0.0197509	0.130681	0.0842024	0.0273411	0.00129443	0.0661491	0.237713	0.473393	0.222129
D-dichotoma_M_contig1357.2679.1	OG0009648	11.5193	10.8458	10.5888	0	0	4.87262	11.6496	10.9298	10.6191	11.3599	10.2469	10.3455	9.62792	9.9528	9.53883	9.08455	9.48305	9.47921	9.80125	9.12968	9.37997	9.57485	10.1288	10.0798	10.1771	9.51294	9.22157	turquoise	-0.626729	0.894034	0.884663	0.417973	0.443261	-0.673394	-0.117871	0.534271	0.227348	0.123743	0.000468915	3.35153e-10	9.17298e-10	0.0300442	0.0205733	0.000118287	0.558184	0.00409598	0.254099	0.538599
D-dichotoma_M_contig1357.2682.1	OG0009649	4.49042	0	0	0	5.41954	0	6.44248	3.42606	3.50777	8.09231	7.51667	6.91458	1.41691	4.08873	2.18963	3.14627	3.50673	3.39733	2.31601	2.39267	5.28257	3.56274	1.02717	2.62904	2.24091	2.00632	3.45699	grey	-0.0666118	0.370965	0.141997	0.406416	0.424148	-0.0636509	-0.0527441	-0.295246	-0.131016	0.675705	0.741314	0.0567815	0.479867	0.0354096	0.0274584	0.752451	0.793877	0.134886	0.514801	0.000109799
D-dichotoma_M_contig1358.2684.1	OG0009650	0	0	0	0	0	0	0	0	0	0	0	0	0	0	0	0	0	0	0	0	0	0	0	0.293353	0	0.517103	0	NA	NA	NA	NA	NA	NA	NA	NA	NA	NA	NA	NA	NA	NA	NA	NA	NA	NA	NA	NA	NA
D-dichotoma_M_contig1358.2685.1	OG0009651	0	0	0	0	0	3.38293	0	0	0	0	0	0	1.75954	3.01589	1.56513	2.42852	0.745095	0.356693	1.67299	1.7913	2.21131	1.08335	0.75874	2.20406	1.51777	0.719506	1.75018	NA	NA	NA	NA	NA	NA	NA	NA	NA	NA	NA	NA	NA	NA	NA	NA	NA	NA	NA	NA	NA
D-dichotoma_M_contig1358.2686.1	OG0009652	1.88155	0	0	0	5.99322	3.38293	0	0	0	0	0	0	2.40453	2.86809	3.35909	2.65458	0.293208	1.56726	2.37253	1.59157	1.93512	1.69506	2.31588	2.9569	2.43983	1.19739	2.51804	blue	0.00792668	-0.605053	-0.259663	-0.665904	-0.614111	0.545754	0.346158	-0.375856	0.374042	-0.18524	0.968699	0.0008272	0.190883	0.00014992	0.000655796	0.00323435	0.07694	0.0533462	0.0546004	0.354949
D-dichotoma_M_contig43.13868.1	OG0009653	5.45797	2.64168	6.41897	4.16764	0	3.38293	5.55632	5.77127	6.30033	7.00145	6.67497	7.17562	7.584	8.12834	9.92133	7.76442	8.30814	6.27749	9.42682	8.50661	8.26119	6.68404	8.00685	5.68674	6.36272	6.73334	5.47907	turquoise	-0.740479	0.36658	0.730585	-0.180038	-0.00598934	-0.0166704	0.146948	0.687718	0.62022	0.263274	1.00507e-05	0.0600067	1.51189e-05	0.368858	0.976347	0.934226	0.464525	7.37622e-05	0.000558491	0.184566
D-dichotoma_M_contig43.13870.1	OG0000654	6.68677	6.21661	7.41051	7.89846	9.03205	7.82887	7.94623	7.15333	8.13504	9.06133	9.14875	9.04281	9.55612	8.87055	9.42496	10.1097	9.87283	8.87127	8.76542	9.02823	10.3327	9.95531	8.99575	9.05043	8.72795	9.75456	10.0521	yellow	-0.451923	-0.240688	0.277412	-0.617609	-0.0129721	0.554616	0.498448	0.128207	0.718536	0.440861	0.0179567	0.226528	0.161232	0.000598416	0.948797	0.00268	0.00813963	0.523931	2.42899e-05	0.0213511
D-dichotoma_M_contig44.14070.1	OG0009654	3.85035	0	0	8.91247	7.39403	9.02169	2.8361	3.96558	3.50777	5.55175	4.97057	5.35334	1.85778	0.838041	2.34941	1.29933	2.99751	2.59664	2.80101	1.69489	2.21131	2.45307	1.02717	3.47856	2.66846	4.53609	5.49596	turquoise	0.795815	-0.589214	-0.786024	-0.0222897	-0.103189	0.496519	0.145382	-0.356595	-0.429241	0.269031	6.95812e-07	0.00122145	1.18e-06	0.912129	0.608521	0.00842925	0.46935	0.067881	0.0254639	0.174797
D-dichotoma_M_contig44.14074.1	OG0009655	0	0	2.38634	0	0	0	2.8361	0	2.62933	3.01127	0	0	1.85778	0.336329	1.04863	1.4026	0	0.642448	1.48067	1.22805	0.853502	1.08335	1.44892	1.70259	2.72037	2.2868	2.81586	NA	NA	NA	NA	NA	NA	NA	NA	NA	NA	NA	NA	NA	NA	NA	NA	NA	NA	NA	NA	NA
D-dichotoma_M_contig44.14076.1	OG0009656	0	0	2.38634	4.16764	5.41954	4.31207	3.73137	2.5544	0	2.17994	0	0	0	0	0.617565	0	0	0	0	0	0.853502	0	1.44892	1.88979	0.551757	2.52152	2.9689	NA	NA	NA	NA	NA	NA	NA	NA	NA	NA	NA	NA	NA	NA	NA	NA	NA	NA	NA	NA	NA
D-dichotoma_M_contig44.14077.1	OG0009657	6.89636	7.3983	6.18747	10.1524	12.0862	9.44907	8.05016	6.62183	7.08611	6.42211	6.16643	3.16609	8.57303	9.7544	7.84791	8.1778	7.88296	8.41342	9.00998	8.72907	7.03241	7.44348	9.62425	9.37733	8.65062	8.30825	7.73275	blue	0.204383	-0.73094	-0.439494	-0.661961	-0.702213	0.583275	0.271298	-0.281988	0.267913	-0.340952	0.306499	1.49033e-05	0.021805	0.000169395	4.45019e-05	0.00140652	0.171051	0.154149	0.176664	0.0817911
D-dichotoma_M_contig44.14082.1	OG0009658	1.88155	0	0	2.73491	4.45286	4.31207	2.8361	2.5544	3.50777	4.22163	0	3.16609	3.33148	4.84946	5.20848	6.18906	6.20979	5.56317	5.54119	6.0022	2.97425	4.05878	5.60217	5.17695	5.15815	5.56502	4.57605	yellow	-0.324116	-0.392714	0.151261	-0.728652	-0.465202	0.594746	0.47347	0.171999	0.733201	0.0722112	0.0990792	0.0427365	0.45137	1.63405e-05	0.0144804	0.00106843	0.0126121	0.390969	1.3595e-05	0.720393
D-dichotoma_M_contig44.14083.1	OG0009659	5.62424	4.06365	6.00954	6.51593	4.45286	5.58975	5.81423	5.48762	6.30033	6.48033	6.35656	7.39659	6.61276	6.49187	6.84301	6.53429	6.10032	6.92944	6.80516	7.06027	6.55138	6.36953	6.59759	6.63716	6.93223	6.47476	6.67793	red	-0.458388	0.0444277	0.443833	-0.327963	-0.189039	0.325498	0.342906	0.589996	0.596823	0.442551	0.0161871	0.825842	0.0203915	0.0949063	0.344992	0.097565	0.0799431	0.00119874	0.00101544	0.020801
D-dichotoma_M_contig534.15898.1	OG0009660	8.26236	8.1497	8.17255	0	4.45286	3.38293	7.08851	6.5486	8.02442	9.93023	10.6252	10.095	10.2504	9.37542	9.38247	10.4932	9.5797	10.1029	9.89498	10.1682	9.52132	9.91574	10.2054	10.1748	9.41532	9.968	10.3061	turquoise	-0.809007	0.586968	0.892142	-0.0468608	0.230523	-0.205998	0.19136	0.37414	0.625414	0.33602	3.26024e-07	0.00128881	4.13749e-10	0.816459	0.247347	0.302608	0.33899	0.054532	0.000485917	0.0865975
D-dichotoma_M_contig534.15899.1	OG0000655	4.6532	0	3.77451	0	5.41954	0	4.67601	5.32171	4.04982	7.44325	8.38756	7.70306	5.73475	5.85072	5.73286	7.3744	6.79411	6.37821	6.47488	6.94972	5.65018	5.01483	6.92375	5.93024	5.27558	6.52628	6.49677	turquoise	-0.563131	0.348266	0.584368	-0.0812099	0.109874	0.111282	0.304564	0.0518594	0.51318	0.594122	0.00222616	0.0750398	0.00137075	0.687185	0.585366	0.58054	0.122434	0.797263	0.00619117	0.00108482
D-dichotoma_M_contig534.15901.1	OG0009661	4.49042	0	3.24132	0	0	0	3.73137	2.5544	4.44292	6.87694	7.59426	6.70997	4.25798	4.17513	4.3131	5.45083	4.55681	4.92843	4.87059	5.51571	3.83931	2.94743	5.711	4.31765	3.60655	3.94871	4.66836	turquoise	-0.540422	0.5559	0.67964	0.159341	0.224423	-0.060546	0.210586	0.369997	0.380388	0.664948	0.00361294	0.00260689	9.65781e-05	0.427268	0.260426	0.764181	0.291726	0.0574813	0.0503101	0.000154452
D-dichotoma_M_contig534.15902.1	OG0009662	0	0	0	0	0	0	2.02518	3.42606	4.75152	5.31632	6.52453	5.61048	3.74488	3.23286	4.05938	5.1653	4.23294	4.49809	4.25602	4.99448	3.62016	2.72132	5.20885	3.76841	2.50047	4.30392	3.61997	turquoise	-0.539029	0.348878	0.591491	-0.0546539	0.151647	0.146161	0.296531	0.353926	0.487969	0.697873	0.00371784	0.074495	0.00115632	0.78658	0.450202	0.466946	0.133116	0.0701151	0.00981906	5.19284e-05
D-dichotoma_M_contig534.15903.1	OG0009663	2.67116	3.52119	2.38634	4.16764	4.45286	4.31207	2.8361	4.35734	4.04982	6.69222	7.05022	6.91458	4.69005	5.10193	4.96699	5.69926	4.95294	5.10342	5.23311	5.80846	3.91843	2.87592	5.91917	4.4722	2.81891	4.85898	4.68318	grey	-0.0812134	-0.00478086	0.078613	-0.0423864	-0.0457281	0.458412	0.38221	0.0401422	0.175321	0.810386	0.687172	0.981118	0.696714	0.833731	0.820824	0.0161809	0.0491282	0.842423	0.381743	3.00187e-07
D-dichotoma_M_contig534.15904.1	OG0009664	6.25119	5.23588	6.10125	8.84308	7.20261	7.41595	6.39063	4.66512	5.98297	5.93152	4.97057	4.63971	6.46474	5.35424	6.52366	6.44335	5.6669	5.91799	6.11786	5.9768	5.50394	5.63984	6.01492	6.06753	6.11374	6.2603	5.60898	turquoise	0.529281	-0.74803	-0.685908	-0.391494	-0.52698	0.532682	0.135332	-0.169833	-0.109918	-0.294552	0.00452722	7.26973e-06	7.84096e-05	0.0434431	0.00473873	0.00422934	0.500925	0.397051	0.585217	0.135849
D-dichotoma_M_contig534.15912.1	OG0000656	7.24169	6.86162	7.21908	6.76137	0	6.06659	6.28097	6.5486	5.85951	7.11606	7.51667	7.2531	8.69016	7.69597	8.44707	8.23489	8.13275	8.31139	7.54415	7.79485	8.1135	8.0704	7.75748	8.04885	7.81879	7.75992	8.49843	turquoise	-0.638413	0.343371	0.722886	-0.178515	0.100765	-0.125905	0.201225	0.938699	0.586191	0.106009	0.000339218	0.0795086	2.05259e-05	0.372991	0.617011	0.531472	0.314192	4.58319e-13	0.00131285	0.598706
D-dichotoma_M_contig534.15917.1	OG0009665	5.90842	4.76569	4.16295	6.42387	6.7211	7.94386	3.73137	4.35734	5.40936	5.18244	4.40844	4.63971	4.92346	5.30719	5.59081	7.41973	7.10638	6.08824	5.8357	5.96651	6.99183	7.37381	5.73931	5.56833	5.8539	7.21572	7.17934	brown	0.0422096	-0.672793	-0.25879	-0.71804	-0.140633	0.54882	0.23882	0.0312496	0.379036	-0.17087	0.834415	0.000120585	0.192432	2.47561e-05	0.48414	0.00303242	0.230263	0.877033	0.0512013	0.394132
D-dichotoma_M_contig534.15918.1	OG0009666	7.24169	7.04455	7.67213	8.7323	6.40259	9.32726	6.91584	6.62183	7.14016	7.22223	7.66789	6.8159	7.75628	7.99811	7.82543	8.20305	8.03697	8.35406	8.02164	8.09201	8.19322	8.50597	7.70701	7.94707	8.19754	8.29445	8.07245	brown	-0.104528	-0.539442	-0.0610433	-0.677616	-0.315708	0.512769	0.250078	0.578986	0.472288	-0.0983353	0.603854	0.00368645	0.762299	0.00010319	0.108675	0.0062396	0.208369	0.0015548	0.0128663	0.625569
D-dichotoma_M_contig536.15928.1	OG0009667	0	0	0	0	0	0	0	0	0	0	0	0	0	0	0	0	0	0	0	0	0	0	0	0	0	0.517103	0	NA	NA	NA	NA	NA	NA	NA	NA	NA	NA	NA	NA	NA	NA	NA	NA	NA	NA	NA	NA	NA
D-dichotoma_M_contig536.15933.1	OG0009668	7.54106	8.34835	6.67919	6.68411	9.74467	4.31207	8.93427	7.84605	8.10817	8.65669	7.9884	8.00132	4.92346	5.13464	3.78898	6.3069	5.60144	3.93592	4.95631	4.51902	5.52937	5.90524	4.64659	4.51551	4.56039	5.90309	6.60194	brown	0.485594	0.31254	-0.294108	0.73455	0.600424	-0.386179	-0.315464	-0.623081	-0.738626	0.172243	0.0102374	0.112463	0.136467	1.2864e-05	0.000928944	0.0466306	0.108963	0.00051743	1.08646e-05	0.390286
D-dichotoma_M_contig536.15936.1	OG0009669	1.88155	0	3.77451	7.59503	9.34185	5.84779	2.8361	0	0	2.17994	0	0	0.562846	0.838041	1.16778	1.49898	0.745095	2.03046	1.76031	1.59157	0.488969	0.804027	1.70001	1.70259	0.76452	0.281597	0.609128	turquoise	0.703288	-0.730485	-0.880865	-0.19094	-0.451513	0.483367	-0.0365925	-0.600498	-0.387853	-0.206414	4.28148e-05	1.51798e-05	1.3463e-09	0.340071	0.0180741	0.0106432	0.856208	0.000927238	0.0456072	0.301611
D-dichotoma_M_contig536.15937.1	OG0009670	3.55322	3.52119	0	7.86384	8.97327	7.1546	3.35209	3.42606	5.22156	2.17994	3.47482	3.16609	5.54135	4.3709	5.62766	5.91985	5.6669	4.68274	4.50388	4.9324	3.36165	4.67903	5.1039	4.78697	4.51702	4.78195	5.18825	blue	0.332013	-0.83291	-0.595157	-0.624719	-0.522816	0.728092	0.326686	-0.321815	0.132366	-0.111232	0.0906579	7.03598e-08	0.00105776	0.000495129	0.00514279	1.67109e-05	0.0962774	0.10164	0.510438	0.58071
D-dichotoma_M_contig536.15939.1	OG0009671	5.36704	5.73892	4.72082	4.16764	0	4.31207	3.73137	5.13421	4.75152	4.47172	0	0	5.84065	5.30719	5.7085	3.94755	4.51476	5.57171	5.46525	5.48721	3.99343	4.35016	5.65761	5.7903	6.0543	3.73181	4.25732	turquoise	-0.400087	0.111626	0.41028	-0.264721	-0.336594	-0.244078	-0.0204209	0.601751	0.423567	-0.564448	0.0386577	0.579361	0.0335366	0.182076	0.0860276	0.219854	0.919472	0.000898717	0.027694	0.00216222
D-dichotoma_M_contig278.9574.1	OG0009672	5.45797	5.23588	3.77451	4.56247	0	0	6.22285	5.32171	0	6.36144	6.93564	6.8159	3.93691	3.45635	3.73211	3.78503	2.9137	3.88205	4.09736	3.68469	3.18092	3.25982	5.05968	4.18085	4.48736	3.98843	4.21714	turquoise	-0.193321	0.576476	0.426966	0.451716	0.273314	-0.291476	0.06292	0.324234	-0.020723	0.442073	0.333969	0.00164769	0.0263396	0.0180157	0.167768	0.140176	0.755207	0.0989496	0.918284	0.0209555
D-dichotoma_M_contig278.9579.1	OG0009673	5.45797	4.76569	3.24132	7.31652	0	3.38293	6.03296	3.42606	4.44292	5.31632	4.97057	3.16609	0.562846	1.03574	1.38009	0.791248	0	0	0.996303	1.48027	0.488969	0	1.02717	0.745413	0.551757	1.75315	1.85865	green	0.624038	0.246063	-0.334454	0.737334	0.349055	-0.341634	-0.300225	-0.00826148	-0.772192	0.111642	0.00050429	0.21601	0.0881681	1.14659e-05	0.0743379	0.081142	0.128123	0.967378	2.37997e-06	0.579308
D-dichotoma_M_contig279.9626.1	OG0009674	5.16596	3.52119	3.24132	0	0	0	4.83965	0	3.50777	5.93152	0	0	6.23269	10.2751	8.67852	10.2333	9.40367	7.75578	8.49007	8.0217	8.92582	8.8176	7.95649	9.51129	8.25147	8.74359	8.54483	yellow	-0.752383	0.102768	0.686331	-0.562583	-0.12009	0.09107	0.318488	0.499933	0.899514	-0.100261	6.00072e-06	0.609994	7.73018e-05	0.00225322	0.550745	0.65144	0.105429	0.00792239	1.77922e-10	0.618781
D-dichotoma_M_contig280.9685.1	OG0009675	0	0	0	0	0	0	0	0	0	2.17994	0	0	0	0	0	0	0	0	0	0	0	0	0	0	0	0	0	NA	NA	NA	NA	NA	NA	NA	NA	NA	NA	NA	NA	NA	NA	NA	NA	NA	NA	NA	NA	NA
D-dichotoma_M_contig280.9690.1	OG0009676	0	0	0	2.73491	0	0	0	0	0	0	0	0	1.75954	1.85814	0	0	0	0	0	0	0	0	0	0.293353	0	0	0	NA	NA	NA	NA	NA	NA	NA	NA	NA	NA	NA	NA	NA	NA	NA	NA	NA	NA	NA	NA	NA
D-dichotoma_M_contig1631.4408.1	OG0009677	0	0	0	0	0	0	2.02518	0	0	0	0	0	4.10636	1.20958	2.13218	1.49898	1.97442	2.7246	4.01098	3.93735	1.77427	2.94743	3.78683	2.87058	4.27812	4.89077	3.49109	NA	NA	NA	NA	NA	NA	NA	NA	NA	NA	NA	NA	NA	NA	NA	NA	NA	NA	NA	NA	NA
D-dichotoma_M_contig1633.4418.1	OG0000657	4.09662	5.23588	4.93537	10.7298	8.29692	10.7619	5.35458	5.13421	6.09669	3.01127	4.97057	3.16609	0.562846	1.50476	3.8964	1.18808	1.97442	1.08539	4.32925	3.28189	0	1.69506	1.35447	2.20406	0.551757	3.5041	5.47907	green	0.938758	-0.434725	-0.84253	0.226825	-0.0515267	0.145973	-0.207878	-0.402691	-0.726497	-0.142013	4.52974e-13	0.0234495	3.54278e-08	0.255223	0.798537	0.467525	0.298118	0.0372935	1.78062e-05	0.479817
D-dichotoma_M_contig1635.4423.1	OG0009678	4.79946	2.64168	0	0	0	0	3.35209	0	0	5.65647	4.40844	3.16609	6.09848	8.11201	5.07764	5.96273	7.19114	8.76738	6.34672	6.10895	6.75371	8.4896	6.55309	7.67993	7.36416	7.20733	6.67051	turquoise	-0.76379	0.122385	0.683412	-0.505145	-0.117638	0.192553	0.366929	0.482084	0.882272	0.207626	3.56132e-06	0.543098	8.52468e-05	0.00719821	0.558969	0.335931	0.0597447	0.010883	1.16972e-09	0.298718
D-dichotoma_M_contig1635.4427.1	OG0009679	0	2.64168	0	0	0	0	2.02518	0	0	3.53532	0	0	0.308699	1.20958	1.87634	1.58932	1.36599	1.2645	3.28614	2.32985	0.853502	0.457315	2.09999	1.88979	1.51777	1.19739	2.14231	NA	NA	NA	NA	NA	NA	NA	NA	NA	NA	NA	NA	NA	NA	NA	NA	NA	NA	NA	NA	NA
D-dichotoma_M_contig1000.103.1	OG0009680	4.49042	4.06365	0	0	0	0	4.98661	0	0	5.65647	3.47482	0	7.10051	6.31763	4.08988	3.85953	3.07672	8.06622	5.24829	5.13889	5.86514	6.43318	3.63438	7.0689	7.54598	4.43908	4.49434	turquoise	-0.68231	0.172221	0.619071	-0.375552	-0.205485	0.0484341	0.191124	0.420846	0.736179	0.0629497	8.84289e-05	0.390348	0.000575759	0.053555	0.30384	0.810406	0.339597	0.0288176	1.20285e-05	0.755095
D-dichotoma_M_contig997.20569.1	OG0009681	6.39619	5.87397	5.5702	4.16764	4.45286	4.31207	5.96367	5.63641	6.39229	6.36144	5.94738	5.82865	1.54039	2.05328	0.617565	1.06754	2.46133	1.69773	2.75922	2.81584	1.14426	1.85235	0.899188	1.79923	0.949901	2.08171	2.37926	brown	0.586333	0.378891	-0.324815	0.890446	0.474497	-0.49483	-0.503084	-0.364154	-0.907608	0.107331	0.00130841	0.0512977	0.0983116	4.98103e-10	0.0123947	0.00868981	0.00747759	0.0618512	6.51501e-11	0.594128
D-dichotoma_M_contig997.20570.1	OG0000658	10.1126	10.2111	10.2809	12.6347	12.6524	12.4227	9.03904	9.89403	9.53683	9.51568	10.2104	10.0083	10.4684	9.30711	10.0383	10.6572	10.4203	10.7234	9.83401	10.2238	11.674	11.756	9.54428	9.70263	9.76423	10.4078	11.0902	blue	0.455268	-0.792256	-0.720379	-0.427914	-0.159507	0.485402	-0.0806657	-0.363664	-0.171758	-0.219038	0.0170224	8.45803e-07	2.26259e-05	0.0259721	0.426782	0.0102718	0.689178	0.0622287	0.391644	0.272338
D-dichotoma_M_contig998.20573.1	OG0009682	3.85035	2.64168	0	5.98251	0	7.1546	3.73137	2.5544	3.50777	6.01267	6.67497	6.01812	5.14392	4.6068	4.67678	4.61829	5.08333	4.15617	4.47835	4.94293	4.92843	4.02612	5.85594	4.50122	4.17027	4.56265	5.03487	grey	-0.0410723	-0.161845	0.0529508	-0.19876	-0.0684236	0.463623	0.409215	0.573007	0.261375	0.593095	0.838818	0.419946	0.793086	0.320282	0.734524	0.014862	0.0340447	0.00178392	0.187869	0.00111226
D-dichotoma_M_contig7.17867.1	OG0009683	0	0	0	2.73491	0	0	0	0	0	3.53532	0	0	0	0	0	0	0	0	0.6753	0	0.488969	0	0	1.88979	0.76452	0.281597	0	NA	NA	NA	NA	NA	NA	NA	NA	NA	NA	NA	NA	NA	NA	NA	NA	NA	NA	NA	NA	NA
D-dichotoma_M_contig7.17868.1	OG0009684	5.16596	0	2.38634	8.31198	11.6243	6.06659	5.81423	5.32171	0	7.73391	0	5.35334	1.13287	2.96828	1.16778	0.630339	2.13107	2.12626	1.48067	1.22805	0.488969	2.3513	2.54698	4.30124	3.97038	3.05803	1.50522	turquoise	0.662448	-0.4379	-0.710407	0.0781259	-0.26065	0.305875	0.0872623	-0.608793	-0.438034	0.0428685	0.000166878	0.0223438	3.3005e-05	0.698506	0.189141	0.120752	0.66516	0.00075221	0.0222981	0.831867
D-dichotoma_M_contig7.17874.1	OG0000659	4.30692	4.45696	3.24132	7.31652	8.47695	5.58975	4.03141	5.13421	4.04982	5.43883	5.37406	5.35334	7.22537	5.98833	7.52	7.09298	7.24571	6.69179	6.61326	7.00102	5.90454	6.08245	6.84994	6.67267	6.1378	6.41042	6.44552	brown	-0.12891	-0.677354	-0.185057	-0.812069	-0.606102	0.811298	0.521631	-0.15317	0.56943	0.121583	0.521637	0.000104076	0.355434	2.71164e-07	0.000805528	2.84133e-07	0.00526299	0.445612	0.00193444	0.545767
D-dichotoma_M_contig7.17886.1	OG0009685	3.85035	3.52119	3.24132	0	0	0	2.02518	4.66512	4.04982	5.43883	0	5.35334	5.44192	4.35247	4.78325	3.60184	4.59767	5.31133	4.89009	4.96377	4.0991	3.56274	4.91827	4.26786	4.20712	3.13084	4.04417	NA	NA	NA	NA	NA	NA	NA	NA	NA	NA	NA	NA	NA	NA	NA	NA	NA	NA	NA	NA	NA
D-dichotoma_M_contig7.17888.1	OG0009686	0	0	0	0	0	0	0	0	0	0	0	0	0	0	0	0.242014	0	0	0	0	0	0	0	0	0	0	1.0361	NA	NA	NA	NA	NA	NA	NA	NA	NA	NA	NA	NA	NA	NA	NA	NA	NA	NA	NA	NA	NA
D-dichotoma_M_contig744.18289.1	OG0009687	5.27	6.21661	5.12211	2.73491	4.45286	4.31207	7.99913	5.77127	6.09669	12.9752	13.3888	13.1341	5.86448	6.16764	5.83541	4.83689	5.47557	5.41929	6.97907	5.57785	6.12904	5.88717	8.34982	5.71179	6.23023	6.2603	5.81821	blue	-0.0919049	0.528952	0.279485	0.536404	0.392077	-0.102945	0.110071	0.0122295	-0.15005	0.862147	0.648446	0.00455698	0.157996	0.00392264	0.0431045	0.609374	0.58469	0.951724	0.455042	7.50828e-09
D-dichotoma_M_contig746.18303.1	OG0000014	0	0	0	0	0	0	0	0	0	0	0	0	1.54039	0.608885	0.918746	0.630339	0	0	0.844711	0.740931	0.853502	0	0.899188	2.51984	3.11883	1.65782	1.20998	NA	NA	NA	NA	NA	NA	NA	NA	NA	NA	NA	NA	NA	NA	NA	NA	NA	NA	NA	NA	NA
D-dichotoma_M_contig164.4447.1	OG0009688	4.09662	0	3.24132	2.73491	0	4.31207	3.35209	0	2.62933	5.7541	3.47482	4.63971	0.562846	3.34893	2.39897	0.935998	0	1.92785	3.2564	2.19535	1.38613	1.08335	1.84601	1.36647	2.61461	0.896975	1.20998	grey	0.250379	0.169227	-0.10364	0.409322	0.00375817	0.0146306	-0.0607387	0.159927	-0.313354	0.442713	0.207804	0.398762	0.606949	0.0339933	0.985157	0.94226	0.763452	0.425549	0.111481	0.020749
D-dichotoma_M_contig165.4498.1	OG0000660	9.53524	8.88463	10.0004	7.99759	7.97613	8.85538	7.64802	8.62868	9.6714	7.73391	8.29764	8.00132	9.69341	9.11282	9.77211	9.62974	9.39935	9.53973	9.29593	9.69541	9.31566	9.355	9.40616	9.22855	8.80661	9.35476	9.69145	turquoise	-0.53921	0.0889541	0.497369	-0.400656	-0.102045	-0.17407	-0.0155687	0.441709	0.527494	-0.481204	0.00370404	0.659051	0.00830053	0.0383566	0.612521	0.385202	0.938565	0.0210738	0.00469075	0.0110499
D-dichotoma_M_contig1815.5373.1	OG0009689	2.67116	0	2.38634	6.97106	4.45286	3.38293	4.4914	3.42606	0	6.23186	3.47482	0	5.1918	5.83753	4.99948	4.86428	4.39624	5.50198	5.85567	5.6244	4.48429	4.63639	5.02177	5.11259	4.51702	4.38057	4.66836	brown	-0.149546	-0.463427	-0.0330486	-0.633987	-0.54716	0.602276	0.353172	0.172027	0.559121	0.0979752	0.456577	0.0149101	0.870011	0.000384071	0.00314037	0.000887008	0.0707564	0.390891	0.00243093	0.626842
D-dichotoma_M_contig1816.5374.1	OG0009690	3.55322	0	3.24132	7.99759	10.8456	8.52687	5.96367	0	0	5.31632	4.97057	3.16609	3.33148	3.55633	3.17221	3.70647	1.70204	2.66204	4.43919	4.84525	1.38613	2.80069	3.10637	3.56356	3.46155	3.3295	3.92449	turquoise	0.639409	-0.697118	-0.764162	-0.23217	-0.440518	0.675985	0.190959	-0.509417	-0.222419	0.17473	0.000329777	5.33269e-05	3.49949e-06	0.243892	0.0214643	0.000108808	0.340023	0.00664687	0.264818	0.383376
D-dichotoma_M_contig1819.5379.1	OG0009691	3.55322	3.52119	5.12211	8.43499	8.91199	8.70046	4.03141	4.91865	5.0056	3.01127	3.47482	0	0.308699	2.51746	2.99017	4.43554	3.74361	2.66204	3.2564	3.63358	2.33182	2.94743	2.45893	2.27299	1.11415	3.41944	2.51804	turquoise	0.765045	-0.577435	-0.847709	-0.00412145	-0.134538	0.235266	-0.23703	-0.491076	-0.564279	-0.312428	3.35669e-06	0.00161164	2.40226e-08	0.983722	0.503463	0.237483	0.233882	0.00929332	0.00217034	0.112599
D-dichotoma_M_contig1820.5393.1	OG0009692	4.09662	3.52119	3.77451	14.5826	14.3177	13.376	6.80136	5.13421	4.75152	5.65647	4.40844	5.35334	4.69005	3.84695	4.42498	5.57763	5.40058	5.23817	4.4259	4.85643	6.72649	6.07449	4.39701	3.90497	4.6299	5.38325	5.70654	turquoise	0.745292	-0.828708	-0.942733	-0.247346	-0.279166	0.578969	0.00572913	-0.505739	-0.388166	-0.0743632	8.18627e-06	9.36832e-08	2.00098e-13	0.213547	0.158491	0.00155541	0.977374	0.00711927	0.0454179	0.712404
D-dichotoma_M_contig1820.5394.1	OG0009693	7.24169	6.57486	6.94978	16.7689	17.2698	16.8562	7.4845	8.35568	7.29114	7.66026	8.20174	8.00132	8.7806	7.66458	8.77903	9.03115	9.31712	9.35618	8.75084	9.2607	10.193	9.56351	8.70176	8.4542	8.59956	8.90473	9.12647	blue	0.633721	-0.933053	-0.897746	-0.448389	-0.445807	0.700381	0.0983769	-0.4477	-0.213872	-0.103715	0.000386923	1.33676e-12	2.19097e-10	0.0189891	0.0197738	4.75127e-05	0.625422	0.0191961	0.284087	0.606685
D-dichotoma_M_contig1822.5398.1	OG0000661	8.61827	8.25244	7.89351	16.8847	15.9295	16.3451	9.97742	9.33181	9.43238	10.2643	10.1981	10.0523	8.77117	9.8141	9.49286	9.84472	9.07217	9.22371	10.1482	10.0413	9.16158	8.43933	9.89508	9.39193	9.15674	9.00194	9.02464	turquoise	0.77324	-0.817136	-0.947923	-0.216406	-0.422218	0.661694	0.0992715	-0.455288	-0.394414	0.0566052	2.26061e-06	1.98416e-07	6.27792e-14	0.278284	0.0282464	0.000170795	0.622266	0.0170169	0.0417669	0.779143
D-dichotoma_M_contig691.17796.1	OG0009694	7.96969	7.52685	7.57949	7.09563	6.7211	7.70392	8.44277	7.10307	7.90461	8.42434	7.92974	7.46331	3.49306	6.79106	5.76629	4.82764	6.21855	4.46183	5.81546	5.1571	4.25964	4.02612	3.98898	4.45747	2.81891	4.56265	4.31558	yellow	0.584824	0.25655	-0.389654	0.776372	0.362366	-0.326958	-0.408082	-0.308025	-0.844517	0.137745	0.00135607	0.196447	0.0445263	1.93533e-06	0.0632382	0.0959835	0.0345922	0.118031	3.05732e-08	0.493247
D-dichotoma_M_contig692.17806.1	OG0009695	5.45797	0	5.9116	2.73491	0	0	5.11997	3.96558	3.50777	3.53532	0	4.0834	7.00726	6.24957	6.01301	5.81611	6.53133	6.43076	5.80523	5.54366	4.51006	5.44361	6.79705	6.78902	7.0151	6.47476	5.38245	turquoise	-0.700103	0.215629	0.692777	-0.389646	-0.201415	-0.0477385	0.287807	0.5523	0.759729	-0.156016	4.79843e-05	0.280056	6.20372e-05	0.0445313	0.313726	0.813081	0.145467	0.00281637	4.30208e-06	0.437101
D-dichotoma_M_contig693.17808.1	OG0009696	0	0	0	0	0	0	0	0	0	0	0	0	1.28187	0	0	1.18808	0.293208	0	0.261803	0.533566	0	0.457315	0.603131	0.537017	0.551757	0.281597	0	NA	NA	NA	NA	NA	NA	NA	NA	NA	NA	NA	NA	NA	NA	NA	NA	NA	NA	NA	NA	NA
D-dichotoma_M_contig693.17809.1	OG0009697	1.88155	0	3.24132	7.67707	6.40259	9.42947	0	0	2.62933	3.01127	4.40844	3.16609	2.74979	4.3709	2.49325	4.49517	3.11475	3.57761	3.75868	3.89458	4.34803	4.65787	3.24445	3.94776	3.39922	4.88025	5.1136	blue	0.431298	-0.85494	-0.635894	-0.572049	-0.348518	0.787286	0.313789	-0.12972	0.0615528	0.114145	0.0246923	1.36276e-08	0.000364146	0.0018232	0.0748144	1.10402e-06	0.110958	0.519003	0.760372	0.570777
D-dichotoma_M_contig693.17812.1	OG0009698	5.7007	6.57486	6.34585	9.37262	8.97327	8.99527	4.83965	6.38995	7.42781	6.48033	7.59426	7.85989	8.23661	7.10075	8.24764	8.39374	8.84568	7.90674	7.72869	8.41784	7.38558	7.76127	7.67439	7.60505	7.29737	8.2735	7.62169	blue	0.111997	-0.779203	-0.412186	-0.703491	-0.442181	0.808262	0.395459	-0.087738	0.286196	0.104365	0.578093	1.67816e-06	0.0326424	4.25018e-05	0.0209204	3.40812e-07	0.0411801	0.66344	0.147834	0.604419
D-dichotoma_M_contig694.17819.1	OG0009699	3.55322	2.64168	0	4.87213	0	0	5.24204	0	3.50777	4.87041	3.47482	0	0.966698	0.838041	0.617565	0	0.293208	0.642448	1.37396	1.08322	0.853502	1.08335	1.2534	0.745413	2.61461	1.65782	1.85865	NA	NA	NA	NA	NA	NA	NA	NA	NA	NA	NA	NA	NA	NA	NA	NA	NA	NA	NA	NA	NA
D-dichotoma_M_contig694.17820.1	OG0009700	3.17858	3.52119	0	2.73491	6.98185	5.84779	4.98661	3.42606	0	5.18244	3.47482	3.16609	0	0.336329	0.236455	0	0.536773	0.642448	0.483315	0.29131	0	0	0.899188	1.79923	1.39536	0	0	turquoise	0.716924	-0.177454	-0.672067	0.427212	-0.00967226	0.0803028	-0.118717	-0.616809	-0.704245	0.193776	2.58336e-05	0.375886	0.00012342	0.0262439	0.961811	0.690509	0.555341	0.000611141	4.13606e-05	0.332812
D-dichotoma_M_contig1249.1949.1	OG0000662	9.29126	9.16043	9.43971	10.0483	10.956	9.63169	8.93427	9.2301	9.24775	9.48757	9.60749	9.62686	10.1699	9.02757	9.02573	8.72481	8.55027	9.84354	9.24291	9.9015	8.8074	8.96378	9.52543	9.11228	9.58463	8.91314	9.26964	turquoise	0.445498	-0.457061	-0.599755	-0.0667874	-0.522217	0.375276	-0.0137962	-0.605839	-0.305425	0.0568518	0.0198696	0.0165382	0.000944517	0.740655	0.00520326	0.053745	0.945548	0.000810926	0.121328	0.778204
D-dichotoma_M_contig1251.1972.1	OG0009701	2.67116	0	0	0	0	0	2.02518	0	0	5.55175	0	0	1.28187	0.336329	0	0.449203	0	0.356693	0.844711	1.08322	0	0	0	0.927471	1.39536	0	0.336476	grey	-0.00327405	0.294487	0.142739	0.306064	0.0310093	-0.133368	0.0151577	0.0342414	-0.0503218	0.258641	0.987069	0.135939	0.477551	0.120512	0.877971	0.507214	0.940184	0.865361	0.803156	0.192696
D-dichotoma_M_contig1253.1978.1	OG0000663	9.69797	9.64891	9.50833	6.83471	6.98185	6.42437	9.23554	9.89403	9.10555	9.1447	8.25048	8.80626	9.91887	9.5872	9.87693	9.8309	9.87491	9.79926	9.87464	9.96133	10.3736	10.0467	9.56288	9.681	9.87824	9.68449	9.83445	turquoise	-0.868315	0.631343	0.943198	-0.0590843	0.217807	-0.484906	-0.0580383	0.502852	0.614254	-0.152492	4.38706e-09	0.000413273	1.81168e-13	0.769721	0.275109	0.0103615	0.773693	0.00750961	0.000653357	0.447652
D-dichotoma_M_contig1253.1981.1	OG0000664	9.5611	9.80919	9.10507	8.89543	7.56301	9.56139	9.78498	8.90291	9.81955	10.3759	10.6617	10.6039	11.7607	11.0665	11.229	11.8408	11.1973	11.3049	11.3151	11.6383	11.4554	11.3397	11.3623	11.1588	11.0835	11.578	11.6568	turquoise	-0.757196	0.152327	0.728529	-0.483482	-0.0278192	0.195814	0.384295	0.693647	0.868231	0.267632	4.83149e-06	0.44815	1.64213e-05	0.0106219	0.890447	0.327653	0.0478035	6.01963e-05	4.41987e-09	0.177137
D-dichotoma_M_contig238.8103.1	OG0009702	0	0	0	7.26438	7.20261	6.06659	0	0	0	2.17994	0	0	1.75954	1.74969	0.236455	0.242014	0	0	1.37396	0.29131	0.853502	0	0.428685	0	1.11415	0	0.336476	turquoise	0.697425	-0.834382	-0.921074	-0.282595	-0.47127	0.621749	0.119617	-0.503208	-0.33447	-0.060901	5.27548e-05	6.3525e-08	9.79629e-12	0.153226	0.0130886	0.000536203	0.552326	0.00746055	0.0881513	0.762837
D-dichotoma_M_contig238.8104.1	OG0009703	0	0	2.38634	6.42387	0	5.58975	0	0	0	0	3.47482	3.16609	0	0	0.236455	3.41685	2.82472	0	0.261803	0	1.93512	3.46866	0	0.293353	0	3.36011	3.99748	blue	0.414118	-0.472172	-0.433484	-0.189998	0.224045	0.392923	0.174896	0.159004	-0.145786	0.146658	0.0317559	0.0128913	0.0238935	0.342505	0.261251	0.042616	0.382914	0.428261	0.4681	0.465414
D-dichotoma_M_contig238.8109.1	OG0009704	0	0	0	5.84729	0	0	2.8361	0	0	3.01127	0	0	3.93691	4.02035	2.58175	1.49898	0	3.0022	4.21023	4.2573	2.54629	3.46866	4.64659	3.79209	4.48736	4.15478	4.37157	yellow	-0.228164	-0.290848	0.181897	-0.586483	-0.466968	0.439241	0.396881	0.408226	0.648998	0.0518799	0.252354	0.141071	0.363853	0.00130376	0.0140634	0.0218898	0.0403912	0.0345222	0.000250063	0.797184
D-dichotoma_M_contig238.8110.1	OG0009705	5.62424	0	0	11.4135	0	0	6.87868	0	0	7.25596	0	0	6.2866	4.35247	4.7066	4.0624	3.59009	5.12677	6.60443	6.11362	4.90919	5.25921	6.61297	6.07238	6.94864	6.37713	6.74659	yellow	-0.166368	-0.227516	0.146881	-0.454598	-0.351614	0.340794	0.312115	0.412276	0.528732	0.00556429	0.406895	0.253739	0.464729	0.0172063	0.0720956	0.0819412	0.112979	0.0326005	0.00457699	0.978025
D-dichotoma_M_contig238.8114.1	OG0000665	7.60214	8.03908	7.96849	8.7323	7.97613	8.70046	6.98741	7.9913	8.21277	7.04068	8.15129	7.85989	8.76248	8.04332	8.10934	8.26518	8.47002	8.28439	7.97676	8.34028	7.76318	8.03596	8.00782	8.38486	8.04558	8.43855	7.68567	blue	0.00257972	-0.551135	-0.231707	-0.55391	-0.439587	0.449623	0.246017	0.180742	0.220434	-0.219023	0.989811	0.00288718	0.24486	0.00272099	0.0217736	0.0186231	0.216098	0.366959	0.269217	0.27237
D-dichotoma_M_contig239.8142.1	OG0009706	7.89029	8.69699	8.65352	0	4.45286	3.38293	9.05578	8.5927	9.18485	9.27377	9.62608	8.97583	5.25626	6.15706	7.61218	5.63708	5.26341	4.66689	6.25197	5.21039	6.32327	4.85668	5.63769	3.88309	4.18881	3.96871	3.45699	blue	-0.172961	0.849037	0.390891	0.83063	0.553466	-0.708027	-0.409512	-0.0759785	-0.410498	0.246763	0.388284	2.1696e-08	0.0437957	8.22636e-08	0.00274702	3.60344e-05	0.0339027	0.706426	0.0334336	0.214664
D-dichotoma_M_contig239.8147.1	OG0009707	7.10769	5.73892	6.41897	9.05738	5.41954	9.36902	5.24204	6.00821	5.40936	5.03484	3.47482	3.16609	2.26827	0	4.27379	2.21812	1.23399	3.05184	6.24819	5.69465	2.07981	3.0806	1.91382	3.88309	0.302097	2.72335	5.01157	turquoise	0.779614	-0.22484	-0.632271	0.321541	-0.0530906	-0.0915312	-0.481754	-0.206082	-0.691137	-0.287578	1.64345e-06	0.259517	0.000402807	0.101948	0.792552	0.649786	0.0109452	0.302406	6.56421e-05	0.145801
D-dichotoma_M_contig239.8149.1	OG0009708	4.09662	0	2.38634	7.26438	8.47695	7.88751	4.03141	2.5544	0	4.47172	5.37406	5.35334	6.06802	4.63756	5.57473	7.05385	7.12746	5.40025	5.32906	5.6244	5.60306	5.94072	5.37444	5.67406	5.12	6.42134	6.23021	blue	0.110746	-0.759529	-0.372687	-0.707485	-0.428933	0.86614	0.496826	-0.128568	0.379767	0.234568	0.582376	4.34207e-06	0.0555526	3.67591e-05	0.025581	5.31807e-09	0.00838255	0.522754	0.0507178	0.238918
D-dichotoma_M_contig239.8150.1	OG0009709	4.09662	2.64168	3.24132	8.77018	9.24579	7.1546	4.98661	0	2.62933	4.68479	4.97057	5.04021	5.93931	4.98719	5.76629	6.66467	7.19558	5.67828	5.80008	5.81993	4.96616	5.41867	6.1546	5.74249	5.60738	6.32766	5.71378	black	0.211725	-0.808135	-0.479445	-0.681957	-0.494553	0.888057	0.474823	-0.229652	0.299042	0.154341	0.289064	3.43398e-07	0.0113902	8.94685e-05	0.00873327	6.43584e-10	0.0123264	0.249187	0.129708	0.442099
D-dichotoma_M_contig240.8206.1	OG0009710	3.17858	2.64168	3.77451	7.71641	4.45286	7.41595	4.27966	0	2.62933	6.08949	3.47482	5.82865	3.63835	4.47675	2.24488	2.37873	3.18793	4.48008	3.16335	2.51065	2.44304	3.73427	4.24734	3.79209	3.49174	3.44822	4.38976	turquoise	0.561157	-0.528862	-0.60184	-0.103423	-0.229917	0.548631	0.266633	-0.0852431	-0.222848	0.295439	0.002325	0.00456517	0.000896731	0.607705	0.248627	0.00304455	0.17882	0.672479	0.263874	0.134619
D-dichotoma_M_contig2633.9073.1	OG0009711	0	0	0	7.93227	7.71425	5.84779	4.27966	0	0	4.22163	0	3.16609	2.69768	3.38563	3.69291	1.83066	3.53506	3.0022	2.52993	2.56621	2.21131	1.85235	2.92108	2.05547	2.37652	1.84257	1.36514	blue	0.453348	-0.780959	-0.705562	-0.414365	-0.530879	0.763968	0.273152	-0.36845	-0.0412794	0.119255	0.0175534	1.53446e-06	3.94311e-05	0.031644	0.00438514	3.53156e-06	0.168031	0.0586141	0.838017	0.55354
D-dichotoma_M_contig2633.9074.1	OG0009712	3.85035	0	0	0	0	0	0	0	4.44292	2.17994	0	3.16609	5.37714	5.83753	5.72802	6.10733	5.39286	5.35153	5.28557	5.21908	5.31217	6.00915	5.27481	5.26418	4.97794	5.80082	5.89026	yellow	-0.737769	0.0323084	0.637548	-0.603243	-0.162148	0.192742	0.359053	0.474271	0.890601	0.0124575	1.12599e-05	0.872899	0.000347608	0.000865764	0.419064	0.335448	0.0658721	0.0124422	4.89781e-10	0.950825
D-dichotoma_M_contig2636.9078.1	OG0009713	2.67116	3.52119	2.38634	7.2103	6.40259	5.84779	2.8361	2.5544	3.50777	5.18244	4.40844	0	0	2.30396	0.776001	0.630339	0.745095	0.356693	2.47935	2.19535	0.853502	0	1.44892	0.745413	0.949901	1.44589	1.0361	turquoise	0.837162	-0.377552	-0.815285	0.277344	-0.0928211	0.186127	-0.172756	-0.49764	-0.707662	0.0364514	5.22365e-08	0.0521935	2.22652e-07	0.161339	0.645167	0.352609	0.388854	0.00825993	3.65206e-05	0.856757
D-dichotoma_M_contig2639.9083.1	OG0009714	0	0	0	4.87213	0	0	2.8361	0	0	2.17994	0	0	3.36528	3.52376	2.24488	1.97169	1.70204	2.21609	4.11404	2.61971	1.59321	2.12329	3.59362	3.50745	2.77048	2.40893	0.336476	NA	NA	NA	NA	NA	NA	NA	NA	NA	NA	NA	NA	NA	NA	NA	NA	NA	NA	NA	NA	NA
D-dichotoma_M_contig2645.9102.1	OG0009715	4.30692	2.64168	4.46868	0	0	0	4.03141	4.66512	4.04982	4.47172	6.16643	3.16609	1.94975	3.23286	3.91356	3.51231	4.47145	3.19127	3.82094	4.13402	2.44304	2.63733	3.37047	2.68069	2.66846	3.20014	2.51804	blue	-0.477344	0.843148	0.711227	0.513443	0.453102	-0.556061	-0.179827	0.326128	0.0556806	0.299023	0.0118082	3.38473e-08	3.20144e-05	0.00616028	0.0176226	0.00259782	0.369429	0.0968805	0.782665	0.129733
D-dichotoma_M_contig938.20109.1	OG0000666	6.08996	6.72535	6.73752	14.5173	14.2184	14.2983	7.15218	7.42289	6.71078	8.64401	9.51075	8.90558	8.87965	8.56327	8.37615	8.60946	8.00062	8.10495	8.36853	8.67718	8.19123	8.26313	8.47083	8.48903	8.08571	8.52043	8.7141	turquoise	0.660241	-0.898358	-0.884567	-0.393577	-0.452682	0.792982	0.25705	-0.419392	-0.215001	0.134751	0.000178572	2.03971e-10	9.26357e-10	0.0422423	0.017741	8.13023e-07	0.195545	0.0294333	0.281494	0.502779
D-dichotoma_M_contig940.20149.1	OG0009716	4.93224	4.45696	4.46868	0	0	0	4.67601	0	5.22156	7.93466	7.73794	6.47146	2.19499	5.46129	3.02215	2.65458	1.59849	5.75521	3.0978	2.94721	5.35546	5.32781	2.15706	6.44518	6.55726	4.45334	2.8687	blue	-0.386524	0.609701	0.546133	0.360254	0.35466	-0.305756	-0.00514088	0.225674	0.118387	0.467452	0.0464182	0.000734919	0.00320878	0.064908	0.0694948	0.120904	0.979697	0.257708	0.556449	0.0139506
D-dichotoma_M_contig941.20151.1	OG0009717	1.88155	2.64168	0	3.62227	0	0	0	0	0	0	0	3.16609	0	1.50476	0.236455	0.791248	2.20345	1.56726	0.483315	0.740931	1.14426	1.08335	0	1.59901	0.302097	0.281597	0	NA	NA	NA	NA	NA	NA	NA	NA	NA	NA	NA	NA	NA	NA	NA	NA	NA	NA	NA	NA	NA
D-dichotoma_M_contig3867.12797.1	OG0009718	4.30692	4.45696	3.24132	0	0	0	4.03141	3.96558	2.62933	4.68479	4.97057	0	6.80048	6.42732	6.48402	5.8935	6.11915	5.92467	5.42573	5.33558	5.34118	5.55081	5.45631	5.56146	6.17549	5.63552	5.63971	turquoise	-0.835689	0.381605	0.837122	-0.305133	-0.0126796	-0.157177	0.232624	0.54192	0.777039	-0.0157956	5.79673e-08	0.0495181	5.23849e-08	0.121702	0.94995	0.433653	0.242945	0.00350293	1.87168e-06	0.937671
D-dichotoma_M_contig3870.12814.1	OG0009719	6.44146	6.31485	5.12211	0	0	0	5.96367	5.63641	4.04982	6.48033	4.40844	5.82865	7.09044	6.47494	6.43735	5.90674	5.92412	5.99615	5.47173	4.71611	5.26754	5.61809	6.36302	6.78902	6.2656	5.51149	6.72167	turquoise	-0.769503	0.733313	0.940057	0.115395	0.249612	-0.471326	0.14756	0.513996	0.521378	0.0927921	2.71258e-06	1.35331e-05	3.48989e-13	0.566537	0.209246	0.0130762	0.462645	0.00609592	0.00528895	0.645271
D-dichotoma_M_contig3870.12815.1	OG0009720	0	0	0	0	0	0	0	0	0	2.17994	3.47482	4.0834	1.28187	0	0.918746	0	0	0	0	0.29131	1.14426	0	0	0	0.949901	0	0.838351	NA	NA	NA	NA	NA	NA	NA	NA	NA	NA	NA	NA	NA	NA	NA	NA	NA	NA	NA	NA	NA
D-dichotoma_M_contig3872.12818.1	OG0009721	6.82982	5.42373	2.38634	6.51593	6.7211	0	7.55686	5.13421	6.09669	7.99581	5.94738	6.01812	8.99546	10.5166	9.3474	9.04269	8.95389	9.47694	10.3587	10.1603	8.27629	7.87566	9.76773	10.1813	9.88323	8.96819	8.29146	yellow	-0.661791	0.074266	0.569539	-0.487174	-0.303253	0.25278	0.377723	0.249904	0.821071	0.167085	0.000170285	0.712764	0.00192968	0.00995756	0.124133	0.203335	0.0520783	0.208697	1.54654e-07	0.404846
D-dichotoma_M_contig3873.12820.1	OG0009722	4.6532	5.42373	3.77451	2.73491	0	0	3.35209	5.13421	3.50777	4.87041	0	4.0834	3.86786	4.8755	3.20043	5.43873	4.00892	4.95476	3.82094	4.05854	3.52224	4.69988	3.0167	4.55756	3.99167	4.83739	3.76639	NA	NA	NA	NA	NA	NA	NA	NA	NA	NA	NA	NA	NA	NA	NA	NA	NA	NA	NA	NA	NA
D-dichotoma_M_contig3879.12828.1	OG0009723	7.73533	7.35277	7.51426	5.53161	5.99322	4.31207	8.44277	8.09781	6.91062	7.41367	8.73456	7.90859	7.6744	8.06893	8.36528	7.95911	7.93171	7.46193	8.18442	8.16805	6.72649	6.58663	7.91055	7.90426	7.74708	7.41472	7.10145	turquoise	-0.628493	0.727419	0.784896	0.255497	0.145754	-0.355812	0.0829304	0.276928	0.337203	0.282159	0.000446914	1.71652e-05	1.2518e-06	0.198353	0.4682	0.0685307	0.680898	0.161994	0.0854252	0.153888
D-dichotoma_M_contig3887.12845.1	OG0009724	6.03195	4.76569	6.00954	13.1558	9.63517	12.6745	6.28097	4.35734	5.72449	5.43883	5.37406	4.0834	4.39517	6.1729	6.32647	3.31462	3.92579	4.03798	6.60148	5.59131	3.04648	3.77415	5.86024	5.16793	4.20712	5.31459	4.71239	turquoise	0.8265	-0.695106	-0.888842	-0.0992984	-0.444808	0.463242	0.0156871	-0.303514	-0.469607	-0.13485	1.08563e-07	5.72197e-05	5.92028e-10	0.622171	0.0200845	0.0149554	0.938098	0.123793	0.0134584	0.502464
D-dichotoma_M_contig862.19397.1	OG0000667	5.5435	6.40683	6.79358	0	0	0	4.98661	6.11352	6.47874	6.59016	6.35656	6.59564	7.32104	7.0416	7.80948	8.3362	8.0603	7.72551	7.32535	8.03407	7.48315	7.0312	7.56661	7.62166	7.29523	7.77845	7.23825	turquoise	-0.879224	0.651594	0.977561	-0.0424169	0.244437	-0.345378	0.115329	0.562226	0.647626	0.133935	1.58281e-09	0.000231636	1.98074e-18	0.833613	0.219156	0.0776522	0.566762	0.00227101	0.000260311	0.505396
D-dichotoma_M_contig865.19420.1	OG0009725	8.31196	8.60289	8.10769	9.77785	9.77939	9.86845	9.40193	8.09781	7.19227	8.4537	7.9884	8.21002	0.966698	2.91906	3.65262	2.81295	2.9137	1.2645	2.5788	1.69489	2.21131	1.31727	2.58907	4.06901	2.01012	4.61434	6.25026	green	0.874432	0.000157771	-0.644325	0.66298	0.315607	-0.20137	-0.22556	-0.485233	-0.918458	0.057577	2.50577e-09	0.999377	0.000286498	0.000164162	0.108794	0.313837	0.257954	0.0103023	1.45136e-11	0.775446
D-dichotoma_M_contig865.19422.1	OG0009726	3.17858	0	3.24132	3.62227	0	0	0	0	0	3.9189	0	0	6.16714	5.62373	5.86657	6.07252	6.01239	5.92467	5.88511	6.00723	4.78801	5.15735	6.10107	5.90874	6.03905	6.14199	6.34654	yellow	-0.627251	-0.152507	0.499448	-0.727552	-0.367824	0.32475	0.452516	0.51147	0.909221	-0.0819007	0.000462304	0.447607	0.00799277	1.70743e-05	0.0590779	0.0983823	0.0177879	0.00639486	5.27405e-11	0.684658
D-dichotoma_M_contig865.19423.1	OG0009727	9.5611	10.0635	9.9519	9.94449	8.71081	10.1215	9.62027	10.3895	10.1245	8.66926	9.19929	9.68394	9.52749	9.93046	9.72309	10.4158	10.2358	9.95292	9.50199	9.87733	11.0102	10.7975	9.35028	9.84879	9.9401	10.3556	10.3025	grey	-0.303127	-0.0102936	0.260004	-0.275178	0.317935	-0.198652	-0.171123	0.49069	0.274822	-0.419373	0.124297	0.95936	0.19028	0.164773	0.106068	0.32055	0.393422	0.00935731	0.165342	0.0294415
D-dichotoma_M_contig866.19425.1	OG0009728	6.79537	6.40683	6.00954	0	0	0	6.87868	7.2019	6.2021	6.53629	6.67497	6.01812	6.291	7.19424	5.92271	6.77465	6.98072	6.38791	6.35024	6.17745	7.10608	7.20538	6.43113	6.90213	6.63031	6.79344	6.60584	turquoise	-0.793826	0.81781	0.972985	0.203415	0.427832	-0.560437	-0.0268831	0.516175	0.456053	0.123434	7.76361e-07	1.90205e-07	1.9664e-17	0.308845	0.0260035	0.00236198	0.894112	0.0058476	0.0168089	0.53962
D-dichotoma_M_contig1040.428.1	OG0009729	5.05383	6.98611	0	2.73491	0	0	5.55632	4.35734	6.39229	6.96113	4.97057	7.32663	6.79429	8.68238	7.10991	8.13532	8.31429	8.3152	7.39181	7.44817	6.10388	7.45885	7.79618	8.47355	8.1698	8.00597	6.98063	turquoise	-0.75216	0.379924	0.786003	-0.229692	0.0515055	-0.0172394	0.320843	0.552955	0.731422	0.26308	6.0606e-06	0.0506144	1.18132e-06	0.249104	0.798618	0.931987	0.102736	0.00277724	1.46153e-05	0.1849
D-dichotoma_M_contig1041.433.1	OG0009730	7.62193	6.11119	7.70174	2.73491	0	0	5.45897	6.21167	7.38368	3.53532	3.47482	0	0	0	1.47557	0.449203	0	0.356693	1.13347	1.35967	1.59321	0.804027	4.18009	2.13168	0.76452	2.00632	1.6329	brown	0.231305	0.594208	0.0913287	0.756099	0.430835	-0.804915	-0.489904	-0.0108646	-0.588759	-0.299518	0.245704	0.00108254	0.650512	5.07842e-06	0.0248643	4.14977e-07	0.00948883	0.957107	0.00123486	0.129067
D-dichotoma_M_contig3289.11302.1	OG0009731	0	0	0	0	0	0	0	0	0	0	0	3.16609	4.00281	5.6005	3.73211	5.47473	4.44183	4.36696	4.13052	3.80504	3.18092	5.04774	4.77976	6.07238	5.47764	5.74394	6.72167	yellow	-0.635083	-0.117204	0.543605	-0.718081	-0.228578	0.358155	0.569662	0.439761	0.937125	0.0721046	0.00037251	0.560427	0.00338267	2.47171e-05	0.25147	0.0666009	0.00192437	0.0217158	6.23826e-13	0.72079
D-dichotoma_M_contig3289.11303.1	OG0009732	0	0	0	0	0	0	0	0	0	0	0	0	2.40453	1.36471	1.04863	2.65458	1.23399	1.42381	0.996303	1.22805	0	0.457315	3.50845	6.52506	5.40018	3.29824	4.29642	yellow	-0.31804	-0.123464	0.362836	-0.540667	-0.320973	0.279283	0.704531	0.31118	0.698461	0.0125067	0.105946	0.539521	0.0628714	0.00359478	0.102589	0.158308	4.09343e-05	0.114119	5.08612e-05	0.950632
D-dichotoma_M_contig3292.11316.1	OG0009733	5.90842	4.45696	3.77451	0	0	0	5.73328	4.35734	4.04982	3.9189	4.40844	0	1.54039	0	2.18963	0.242014	0	1.08539	3.19504	3.55337	0.853502	1.85235	2.15706	1.59901	0	1.05499	0.838351	blue	0.0366177	0.701255	0.265736	0.740159	0.345863	-0.738363	-0.590316	0.0340013	-0.430774	-0.0956348	0.85611	4.6054e-05	0.180342	1.01876e-05	0.0772085	1.09845e-05	0.00118956	0.866297	0.0248873	0.635137
D-dichotoma_M_contig3293.11319.1	OG0009734	4.93224	2.64168	4.72082	0	0	0	3.35209	5.63641	5.22156	0	0	0	3.52331	3.45635	4.26045	5.57763	6.32782	4.26541	4.80022	4.13402	4.28971	4.59246	4.36102	4.96417	4.5886	5.49779	4.90176	turquoise	-0.630208	0.335068	0.683796	-0.244056	0.0986376	-0.392965	-0.0418492	0.444545	0.556244	-0.501403	0.000426392	0.0875493	8.41603e-05	0.219898	0.624502	0.0425923	0.83581	0.0201669	0.0025876	0.00771228
D-dichotoma_M_contig3293.11320.1	OG0009735	5.27	4.06365	6.34585	0	0	4.31207	4.27966	6.21167	5.40936	2.17994	0	0	5.11442	5.0797	5.40925	5.70432	5.87511	5.48401	5.56564	5.24485	4.74525	5.09574	4.52177	5.28101	5.37611	5.47	4.9393	turquoise	-0.559494	0.269973	0.597345	-0.241143	-0.0266603	-0.390982	-0.105797	0.530293	0.489982	-0.586322	0.00241121	0.173233	0.00100248	0.225625	0.894985	0.0437425	0.599442	0.00443682	0.00947574	0.00130876
D-dichotoma_M_contig2288.7700.1	OG0009736	4.49042	2.64168	3.77451	8.02918	6.7211	7.1546	4.83965	0	4.04982	5.18244	3.47482	0	5.8103	6.54962	5.2697	6.87235	6.31562	5.11514	6.50047	6.89381	5.18994	4.74071	6.38708	7.50114	6.52478	5.9186	6.41475	brown	0.047295	-0.675227	-0.229918	-0.753434	-0.566767	0.683137	0.442709	0.0799872	0.496263	-0.127782	0.814788	0.000111508	0.248624	5.72575e-06	0.00205349	8.60312e-05	0.0207502	0.691666	0.00846825	0.525319
D-dichotoma_M_contig2288.7708.1	OG0009737	1.88155	0	0	4.56247	5.41954	0	0	0	0	3.01127	0	0	0	1.63242	0.439558	0.449203	0	1.08539	0.483315	1.22805	0.488969	1.08335	1.02717	0.293353	0.949901	0.281597	0	NA	NA	NA	NA	NA	NA	NA	NA	NA	NA	NA	NA	NA	NA	NA	NA	NA	NA	NA	NA	NA
D-dichotoma_M_contig2289.7709.1	OG0009738	2.67116	3.52119	4.46868	0	0	0	4.27966	2.5544	4.75152	5.65647	4.40844	5.61048	0	3.64982	0.776001	2.37873	2.95621	4.11005	4.82068	3.70957	1.93512	3.51646	1.53756	4.59842	3.07962	2.90037	2.05381	blue	-0.290049	0.72037	0.53276	0.525241	0.438105	-0.43914	-0.251801	0.197132	-0.0334346	0.37082	0.142217	2.26337e-05	0.0042227	0.00490412	0.0222739	0.0219236	0.205148	0.324341	0.868506	0.0568863
D-dichotoma_M_contig2297.7743.1	OG0009739	4.30692	0	2.38634	12.2801	10.7956	12.6085	4.03141	2.5544	3.50777	5.84553	3.47482	5.04021	0	3.34893	1.38009	1.06754	0	2.21609	1.48067	1.48027	2.54629	1.51849	2.04056	5.29765	1.39536	4.92188	6.97462	turquoise	0.890709	-0.657839	-0.872741	-0.0500002	-0.181031	0.477775	0.131792	-0.422921	-0.468077	0.0920916	4.84065e-10	0.000192109	2.93376e-09	0.80439	0.366179	0.0117214	0.51229	0.0279574	0.0138065	0.647778
D-dichotoma_M_contig187.5608.1	OG0009740	3.85035	0	4.46868	0	4.45286	0	5.45897	3.96558	5.0056	5.03484	0	4.63971	6.08839	5.55289	6.26765	5.08218	5.30513	4.51589	5.7369	5.68213	4.90919	3.99271	5.12551	5.33842	5.52219	4.99196	4.46032	turquoise	-0.615977	0.248164	0.581778	-0.261673	-0.157538	-0.0343989	0.196601	0.0977754	0.616088	-0.0165863	0.000624607	0.211987	0.00145683	0.187347	0.432585	0.864747	0.325673	0.627548	0.000622793	0.934558
D-dichotoma_M_contig187.5609.1	OG0009741	2.67116	0	0	0	0	0	4.4914	2.5544	4.75152	3.01127	0	5.04021	4.36208	4.4248	4.92531	4.09361	3.22317	3.54331	4.25602	4.2573	2.89822	2.72132	4.33652	3.90497	3.88197	3.60976	2.58273	NA	NA	NA	NA	NA	NA	NA	NA	NA	NA	NA	NA	NA	NA	NA	NA	NA	NA	NA	NA	NA
D-dichotoma_M_contig188.5660.1	OG0009742	3.17858	2.64168	4.16295	9.96913	10.3865	9.54327	0	4.35734	5.57551	5.03484	5.37406	5.04021	4.12621	4.82294	5.12994	5.57763	5.3773	4.38644	4.71534	5.47999	4.40409	3.25982	5.04464	4.28464	3.03931	4.9321	4.60748	turquoise	0.588036	-0.797473	-0.803355	-0.343228	-0.38309	0.680495	0.201469	-0.430446	-0.235936	0.0771671	0.00125641	6.34498e-07	4.54273e-07	0.0796425	0.0485658	9.38978e-05	0.313594	0.0250098	0.236111	0.702039
D-dichotoma_M_contig304.10538.1	OG0009743	0	0	0	0	0	0	0	0	0	0	0	0	0	0	0	0.242014	0	0	0	0	0	0	0	0	0	0	0	NA	NA	NA	NA	NA	NA	NA	NA	NA	NA	NA	NA	NA	NA	NA	NA	NA	NA	NA	NA	NA
D-dichotoma_M_contig304.10539.1	OG0009744	2.67116	0	3.77451	3.62227	4.45286	4.87262	2.8361	3.42606	4.44292	5.31632	5.37406	6.01812	7.83074	6.22446	7.18246	7.34391	7.00624	6.16919	7.50043	7.83781	5.60306	5.41867	8.08705	7.20741	6.03905	7.33415	6.49677	yellow	-0.493699	-0.228455	0.355342	-0.671056	-0.390454	0.586097	0.579441	0.326121	0.808513	0.35291	0.00886809	0.251731	0.0689224	0.000127458	0.0440529	0.00131578	0.00153846	0.0968874	3.35759e-07	0.0709803
D-dichotoma_M_contig713.18032.1	OG0009745	0	0	0	0	0	0	0	0	0	0	0	0	0.308699	0	0	0	0	0	0	0	0	0	0	0	0.302097	0.281597	0	NA	NA	NA	NA	NA	NA	NA	NA	NA	NA	NA	NA	NA	NA	NA	NA	NA	NA	NA	NA	NA
D-dichotoma_M_contig713.18036.1	OG0000668	8.18462	9.34614	8.66859	2.73491	0	4.31207	8.74076	8.49863	8.88586	8.86771	8.95647	9.06447	6.83103	7.78624	7.83334	7.91503	7.07778	7.20921	7.77923	7.74756	6.34491	6.8236	7.09783	7.61504	7.0151	7.00674	6.34654	blue	-0.503338	0.910108	0.787351	0.553263	0.479245	-0.665907	-0.179773	0.563725	0.0585831	0.201979	0.00744273	4.68815e-11	1.10026e-06	0.002759	0.0114296	0.000149906	0.369576	0.00219711	0.771624	0.312346
D-dichotoma_M_contig714.18040.1	OG0009746	3.17858	0	4.16295	0	0	0	5.24204	0	0	5.18244	0	0	2.40453	3.01589	1.72911	1.97169	1.36599	2.38054	3.4527	2.12309	2.07981	2.3513	2.54698	3.61756	3.43072	2.00632	1.20998	NA	NA	NA	NA	NA	NA	NA	NA	NA	NA	NA	NA	NA	NA	NA	NA	NA	NA	NA	NA	NA
D-dichotoma_M_contig715.18041.1	OG0009747	5.62424	5.87397	6.18747	4.16764	0	5.58975	5.11997	5.8946	5.98297	6.01267	5.94738	6.18557	2.33801	3.42142	4.67678	5.03474	5.86956	3.93592	4.63675	4.60111	5.29744	5.09574	4.47764	3.29189	2.72037	5.07733	5.02327	blue	-0.00950697	0.560912	0.288675	0.572869	0.698962	-0.52756	-0.344956	0.490128	-0.310534	0.145543	0.962463	0.00233754	0.144202	0.00178955	4.99672e-05	0.00468465	0.0780399	0.00945129	0.114912	0.468851
D-dichotoma_M_contig715.18042.1	OG0009748	5.5435	5.01986	6.10125	2.73491	0	4.87262	4.4914	6.00821	4.75152	4.87041	4.40844	6.01812	2.89568	3.76574	4.65654	4.80896	5.39286	3.90923	4.9377	4.40174	4.40409	3.56274	5.09662	3.50745	3.30035	4.53609	4.57605	blue	-0.194279	0.638437	0.472719	0.48841	0.499933	-0.568426	-0.227401	0.572095	-0.13076	0.0444585	0.331534	0.000338984	0.0127729	0.00974297	0.00792248	0.00197861	0.253987	0.00182131	0.51563	0.825723
D-dichotoma_M_contig715.18044.1	OG0009749	8.39484	9.03633	8.90327	5.34342	5.41954	5.58975	8.62211	9.0428	8.93256	8.53835	8.4722	8.6996	6.85502	7.2649	6.92353	7.20258	6.78529	7.30701	7.24436	7.58895	8.21689	8.21866	7.1051	7.33579	7.58326	7.13838	7.79208	blue	-0.304815	0.934071	0.605068	0.748532	0.706666	-0.866349	-0.453418	0.200382	-0.235831	0.0914716	0.122111	1.10989e-12	0.000826873	7.11222e-06	3.7877e-05	5.22171e-09	0.017534	0.316268	0.236325	0.649999
D-dichotoma_M_contig715.18049.1	OG0009750	4.09662	2.64168	0	4.87213	0	3.38293	4.98661	0	0	4.68479	4.97057	0	3.52331	4.2367	3.28194	3.82276	3.50673	3.70719	5.58968	5.23631	3.91843	3.81295	4.99071	5.20367	4.32917	4.71249	4.29642	yellow	-0.220882	-0.143437	0.233184	-0.406595	-0.262173	0.372558	0.31533	0.515701	0.547032	0.21431	0.268219	0.475376	0.241781	0.0353212	0.186475	0.0556442	0.109121	0.0059009	0.00314885	0.283079
D-dichotoma_M_contig715.18050.1	OG0009751	5.7007	4.45696	4.46868	6.83471	4.45286	6.25655	7.60316	4.91865	2.62933	7.75764	4.97057	4.0834	9.60512	10.5612	9.70597	10.1741	9.68811	10.035	9.70891	9.58248	9.62668	9.00312	9.99458	10.0171	9.67291	9.49797	9.38125	yellow	-0.600424	-0.219301	0.443166	-0.760625	-0.400934	0.439459	0.47385	0.513143	0.929434	0.0271597	0.000928936	0.271748	0.0206037	4.1278e-06	0.0382101	0.0218167	0.0125313	0.00619547	2.53061e-12	0.893029
D-dichotoma_M_contig715.18051.1	OG0009752	0	0	3.24132	4.16764	0	0	2.8361	0	0	4.22163	0	4.0834	1.41691	4.74033	1.72911	2.69583	3.35612	2.38054	0.6753	1.48027	1.38613	1.51849	0.230207	1.97501	0.949901	1.19739	1.36514	NA	NA	NA	NA	NA	NA	NA	NA	NA	NA	NA	NA	NA	NA	NA	NA	NA	NA	NA	NA	NA
D-dichotoma_M_contig715.18053.1	OG0009753	2.67116	0	0	0	0	0	2.8361	0	0	4.47172	0	0	3.46216	3.73762	2.88975	2.77496	2.95621	2.38054	0.261803	0.922202	2.44304	1.51849	2.85362	2.8254	2.81891	1.92676	1.6329	NA	NA	NA	NA	NA	NA	NA	NA	NA	NA	NA	NA	NA	NA	NA	NA	NA	NA	NA	NA	NA
D-dichotoma_M_contig715.18056.1	OG0009754	2.67116	0	3.24132	2.73491	0	4.87262	6.33684	4.35734	3.50777	6.69222	5.94738	4.0834	1.85778	3.27259	2.88975	3.2329	1.36599	0.356693	0.261803	0.740931	0.488969	1.08335	3.57279	4.00966	3.39922	2.85811	2.22569	grey	0.295158	0.275404	-0.0337015	0.497276	0.247026	-0.0786466	0.272778	0.157528	-0.32386	0.514964	0.135007	0.164412	0.867465	0.00831458	0.214161	0.69659	0.168637	0.432615	0.0993616	0.00598456
D-dichotoma_M_contig1657.4539.1	OG0009755	0	0	0	6.51593	6.40259	6.94971	0	0	0	0	3.47482	0	0	1.74969	0.439558	1.29933	2.05487	0.356693	0.6753	1.22805	1.77427	1.31727	1.02717	1.08911	0.302097	1.05499	1.75018	turquoise	0.66017	-0.857043	-0.869132	-0.358497	-0.307469	0.687471	0.162369	-0.404787	-0.259741	0.0400962	0.00017896	1.14901e-08	4.07753e-09	0.0663227	0.11873	7.43821e-05	0.418421	0.0362243	0.190745	0.842602
D-dichotoma_M_contig1657.4540.1	OG0009756	2.67116	6.65207	4.72082	0	0	5.84779	5.55632	6.38995	5.98297	4.87041	5.68902	5.82865	7.19515	7.60162	7.08742	8.85571	8.81208	7.77623	7.93044	7.95822	7.29583	7.92742	8.0962	7.97449	8.21235	9.17976	8.58781	turquoise	-0.727312	0.286807	0.767529	-0.344727	0.107177	-0.0468384	0.274358	0.654034	0.747823	0.0829444	1.72385e-05	0.146933	2.98261e-06	0.0782512	0.594663	0.816546	0.166086	0.000215417	7.33577e-06	0.680847
D-dichotoma_M_contig1657.4544.1	OG0009757	0	0	3.24132	5.34342	0	3.38293	4.27966	0	4.44292	5.65647	3.47482	0	3.06975	3.79332	4.04389	3.14627	3.32401	3.90923	4.0805	3.4973	2.33182	2.80069	5.01407	2.9982	3.49174	1.75315	2.58273	grey	-0.103793	-0.142369	0.0682725	-0.236902	-0.269363	0.349678	0.23757	0.42985	0.300959	0.254516	0.606414	0.478705	0.73509	0.23414	0.174244	0.0737869	0.232786	0.0252335	0.127147	0.200142
D-dichotoma_M_contig1657.4546.1	OG0000014	3.17858	0	4.46868	2.73491	0	0	6.44248	4.91865	3.50777	3.53532	3.47482	4.63971	1.85778	3.76574	3.22812	1.18808	0	1.2645	3.84111	2.98847	2.89822	0.457315	4.03538	0	1.11415	0.281597	1.0361	blue	-0.017418	0.521754	0.19683	0.574798	0.166028	-0.382833	-0.316142	0.12375	-0.295693	0.220253	0.931283	0.00525039	0.325099	0.00171242	0.407867	0.0487295	0.108164	0.538576	0.134268	0.269619
D-dichotoma_M_contig1659.4555.1	OG0009758	0	0	0	0	0	0	0	0	0	0	0	0	0	0	0	0	0	0.356693	0	0.29131	0.488969	0	0.428685	0	0.302097	0	0.336476	NA	NA	NA	NA	NA	NA	NA	NA	NA	NA	NA	NA	NA	NA	NA	NA	NA	NA	NA	NA	NA
D-dichotoma_M_contig2039.6509.1	OG0000669	1.88155	0	3.77451	8.94595	10.5762	9.36902	2.8361	4.35734	5.0056	2.17994	5.37406	5.61048	1.28187	3.01589	3.47915	1.83066	1.97442	1.81737	3.47869	2.04702	3.52224	3.20252	4.42051	2.05547	1.92418	3.82252	5.03487	turquoise	0.77845	-0.657576	-0.860104	-0.0804785	-0.17418	0.486774	0.0544473	-0.540596	-0.471864	0.107241	1.74333e-06	0.000193644	8.9197e-09	0.689864	0.384896	0.0100277	0.787368	0.0036	0.0129584	0.59444
D-dichotoma_M_contig2041.6529.1	OG0009759	8.38329	8.81919	8.12963	0	0	3.38293	8.09944	8.81195	7.99539	9.08966	9.06946	8.00132	5.28303	5.30719	2.29809	5.52137	4.02898	5.47494	5.89479	5.40579	4.76679	6.95951	6.93806	8.32728	8.75698	8.47133	7.37008	blue	-0.264536	0.815017	0.623719	0.578364	0.548076	-0.669897	-0.0984224	0.324802	-0.0525878	0.190927	0.182392	2.26372e-07	0.00050864	0.00157739	0.00308043	0.000132234	0.625262	0.0983253	0.794475	0.340106
D-dichotoma_M_contig2041.6530.1	OG0009760	1.88155	3.52119	3.77451	0	0	0	0	3.42606	2.62933	3.01127	4.97057	3.16609	0	0	0	0.935998	0	0	0.844711	0.533566	0	1.69506	1.44892	2.46197	1.8328	0.281597	0	NA	NA	NA	NA	NA	NA	NA	NA	NA	NA	NA	NA	NA	NA	NA	NA	NA	NA	NA	NA	NA
D-dichotoma_M_contig2047.6545.1	OG0009761	0	0	0	0	0	0	0	0	0	0	0	0	0	0	0	0	0	0	0	0	0	0	0	0	0.302097	0	0	NA	NA	NA	NA	NA	NA	NA	NA	NA	NA	NA	NA	NA	NA	NA	NA	NA	NA	NA	NA	NA
D-dichotoma_M_contig264.9089.1	OG0009762	3.85035	5.87397	4.72082	5.84729	4.45286	5.58975	5.73328	0	4.75152	7.47223	6.67497	7.2531	0.308699	2.14177	2.18963	2.10016	1.59849	0.880852	1.25872	1.35967	0	0.457315	0.899188	1.08911	0.302097	0.896975	1.20998	green	0.6403	0.101806	-0.482016	0.669442	0.303868	-0.0682032	-0.165217	-0.340846	-0.784353	0.37598	0.000321537	0.613359	0.0108957	0.000134154	0.123334	0.735349	0.410194	0.081892	1.2878e-06	0.053261
D-dichotoma_M_contig264.9091.1	OG0009763	1.88155	0	0	0	0	0	0	0	0	2.17994	0	0	0	0	0	0	0	0	0	0	0	0	0	0	0	0	0	NA	NA	NA	NA	NA	NA	NA	NA	NA	NA	NA	NA	NA	NA	NA	NA	NA	NA	NA	NA	NA
D-dichotoma_M_contig265.9128.1	OG0009764	1.88155	2.64168	0	3.62227	0	0	4.67601	0	3.50777	4.68479	4.40844	4.63971	2.98534	2.7034	4.01239	2.42852	2.40105	0.880852	4.09736	4.05854	1.14426	1.08335	3.41794	2.73056	2.61461	1.19739	2.58273	NA	NA	NA	NA	NA	NA	NA	NA	NA	NA	NA	NA	NA	NA	NA	NA	NA	NA	NA	NA	NA
D-dichotoma_M_contig266.9170.1	OG0009765	7.29198	8.54334	7.57949	0	0	0	7.83423	8.41868	8.05288	7.91368	8.4305	7.90859	5.28303	7.80161	5.71829	6.73562	6.30744	7.01952	6.82048	6.46739	5.56669	7.02295	6.35999	6.85514	7.24738	6.65836	5.54548	blue	-0.617155	0.940073	0.861239	0.497644	0.49746	-0.688784	-0.16583	0.394782	0.15646	0.187908	0.000605596	3.47819e-13	8.10864e-09	0.00825938	0.00828691	7.11406e-05	0.408434	0.0415596	0.435779	0.347939
D-dichotoma_M_contig266.9171.1	OG0009766	5.62424	5.01986	4.46868	5.84729	4.45286	6.25655	6.16229	5.8946	5.22156	7.11606	7.15635	6.70997	7.21614	7.25749	7.20527	7.21859	7.33903	8.07225	6.85808	6.79262	8.7079	8.66157	6.91756	7.05429	7.68475	7.44894	8.84265	yellow	-0.569449	-0.0429396	0.491108	-0.521919	0.0269269	0.304173	0.358664	0.542784	0.761732	0.335972	0.00193359	0.831592	0.00928805	0.00523359	0.893941	0.122939	0.0661868	0.00344079	3.9211e-06	0.0866455
D-dichotoma_M_contig615.17042.1	OG0009767	2.67116	0	2.38634	0	0	3.38293	3.73137	5.13421	4.44292	4.68479	3.47482	5.04021	0	2.64404	1.27784	2.47666	1.79866	1.69773	0.483315	0.29131	0	1.08335	1.02717	3.35683	1.92418	2.57468	2.14231	NA	NA	NA	NA	NA	NA	NA	NA	NA	NA	NA	NA	NA	NA	NA	NA	NA	NA	NA	NA	NA
D-dichotoma_M_contig616.17056.1	OG0009768	2.67116	0	4.93537	4.16764	0	4.31207	5.11997	4.66512	5.22156	3.53532	3.47482	4.0834	2.58746	2.22514	1.87634	1.58932	1.48692	1.42381	2.91957	1.59157	2.73296	1.51849	3.67403	3.22388	2.31031	2.22162	3.42206	NA	NA	NA	NA	NA	NA	NA	NA	NA	NA	NA	NA	NA	NA	NA	NA	NA	NA	NA	NA	NA
D-dichotoma_M_contig616.17057.1	OG0009769	3.17858	4.06365	4.46868	5.12693	4.45286	3.38293	4.03141	4.35734	5.85951	3.53532	3.47482	5.04021	3.95922	2.64404	3.11404	2.16034	1.48692	2.12626	2.99352	2.72111	0	1.31727	3.63438	3.90497	3.57869	2.85811	2.704	green	0.579183	0.0753789	-0.385554	0.506745	-0.0845638	-0.147005	-0.00734312	-0.331105	-0.62324	0.0298407	0.00154773	0.708643	0.0470167	0.00698741	0.674948	0.46435	0.971003	0.0915981	0.00051522	0.882538
D-dichotoma_M_contig616.17058.1	OG0009770	6.52795	5.58992	5.28743	7.09563	5.41954	6.5747	7.1207	6.5486	6.39229	7.00145	6.35656	7.00694	7.98544	8.65727	8.0764	7.94742	7.71518	7.75015	7.21375	7.04813	6.68749	6.98097	8.26392	8.3007	7.83948	7.55527	7.30926	yellow	-0.520397	-0.103093	0.439487	-0.565931	-0.398413	0.419431	0.659207	0.573573	0.802044	0.218363	0.0053907	0.608857	0.0218072	0.00209212	0.0395553	0.0294166	0.00018429	0.00176105	4.89874e-07	0.273853
D-dichotoma_M_contig617.17061.1	OG0000670	8.50556	10.3097	9.06006	9.04198	9.74467	9.34829	9.90535	9.85659	9.48555	9.8552	9.7999	9.65568	8.72555	8.20094	8.46826	8.31402	8.08685	7.56809	7.72869	8.22418	8.16511	7.98802	8.47924	8.009	7.73451	8.2317	8.09064	yellow	0.596365	0.219239	-0.428005	0.759316	0.389259	-0.307421	-0.268813	-0.474227	-0.858484	0.196315	0.00102692	0.271887	0.0259366	4.3847e-06	0.0447616	0.118791	0.17516	0.0124514	1.02061e-08	0.326393
D-dichotoma_M_contig617.17062.1	OG0000006	6.14573	5.73892	6.79358	2.73491	4.45286	3.38293	6.03296	7.15333	6.84703	7.44325	6.93564	7.39659	8.64099	8.30998	8.18986	7.65755	7.79786	8.12683	7.96991	8.10379	7.07188	7.36405	8.27846	8.59125	8.34538	7.96921	7.23322	turquoise	-0.869528	0.505359	0.901215	-0.182478	-0.0155231	-0.14754	0.284755	0.432444	0.740405	0.211679	3.93455e-09	0.00716963	1.45097e-10	0.362295	0.938745	0.462706	0.149976	0.024271	1.00825e-05	0.289172
D-dichotoma_M_contig618.17070.1	OG0009771	4.93224	3.52119	3.24132	11.3954	12.1473	11.2716	5.73328	4.35734	5.22156	2.17994	0	4.0834	0	2.81525	0.439558	0.242014	0	0	0	0.533566	0	0.457315	0.603131	3.61756	0.551757	3.75502	5.63208	green	0.929918	-0.536289	-0.883327	0.108972	-0.102732	0.208519	-0.0466929	-0.549269	-0.639465	-0.207928	2.32803e-12	0.00393181	1.0514e-09	0.588468	0.610119	0.296599	0.817106	0.00300376	0.000329258	0.298
D-dichotoma_M_contig619.17079.1	OG0000671	8.52672	8.39402	8.63829	9.44467	8.38974	9.46841	7.53314	8.22076	8.44525	8.12917	7.66789	8.32213	11.3896	9.90342	11.0414	10.897	11.0464	10.1715	10.0851	10.4848	10.2808	10.8726	10.1822	10.4123	10.3236	10.5597	10.8573	brown	-0.548668	-0.369989	0.330019	-0.873643	-0.384632	0.433906	0.448917	0.460133	0.874312	-0.199043	0.0030422	0.0574874	0.0927322	2.69785e-09	0.0475916	0.0237418	0.018832	0.0157351	2.5341e-09	0.319579
D-dichotoma_M_contig388.12834.1	OG0009772	7.1355	7.98041	7.75918	2.73491	0	3.38293	6.76108	6.758	7.87303	7.68523	8.38756	7.80948	9.60821	8.61636	9.57667	9.26669	8.98117	8.68227	9.29821	9.6133	7.88882	8.09028	9.33413	9.0263	8.5529	8.78224	8.43524	turquoise	-0.829847	0.60697	0.947794	-0.0579084	0.152319	-0.283426	0.157714	0.724169	0.644268	0.157877	8.67587e-08	0.000787985	6.46948e-14	0.774186	0.448174	0.151971	0.432064	1.95201e-05	0.000286968	0.431584
D-dichotoma_M_contig389.12852.1	OG0009773	5.16596	5.01986	4.72082	3.62227	0	0	4.98661	5.48762	2.62933	3.9189	3.47482	3.16609	4.9006	4.19595	5.3663	6.13759	6.0619	4.92843	5.39876	4.98431	5.03878	4.81905	5.84295	4.94317	4.6832	5.5781	5.65483	turquoise	-0.689608	0.49377	0.805832	-0.0991601	0.182104	-0.3441	0.0813212	0.634992	0.574841	-0.129813	6.91697e-05	0.0088568	3.93329e-07	0.622659	0.363298	0.0788301	0.686778	0.00037345	0.00171072	0.5187
D-dichotoma_M_contig290.10028.1	OG0009774	5.27	3.52119	4.46868	0	0	0	4.67601	4.91865	5.0056	2.17994	3.47482	3.16609	3.63835	3.01589	3.22812	4.22623	3.92579	3.61111	3.95655	3.68469	4.90919	4.50036	3.90816	2.68069	3.43072	3.68422	3.82104	NA	NA	NA	NA	NA	NA	NA	NA	NA	NA	NA	NA	NA	NA	NA	NA	NA	NA	NA	NA	NA
D-dichotoma_M_contig290.10029.1	OG0009775	6.92851	5.73892	6.48855	0	0	0	6.39063	5.77127	6.84703	5.03484	3.47482	4.0834	3.84409	5.85727	4.97518	4.81833	5.28024	5.11514	5.60746	5.42094	6.10388	5.85034	5.00632	5.0841	4.89001	4.99196	4.99977	turquoise	-0.665023	0.840594	0.871973	0.318514	0.436405	-0.745295	-0.29568	0.43987	0.270407	-0.160268	0.000154091	4.0819e-08	3.14923e-09	0.105399	0.0228591	8.18547e-06	0.134286	0.0216793	0.172516	0.424551
D-dichotoma_M_contig290.10032.1	OG0009776	5.97151	5.42373	3.77451	2.73491	4.45286	5.84779	6.87868	3.42606	4.44292	6.96113	4.97057	5.04021	5.3006	6.12486	4.80179	5.07438	5.18514	5.50198	5.57169	5.03442	5.91423	5.40603	5.51752	5.61554	5.32672	3.3295	4.11149	grey	-0.307344	0.255942	0.275121	0.102441	-0.0151939	-0.0536745	-0.050011	0.122603	0.162701	0.237542	0.118888	0.197547	0.164863	0.611136	0.940041	0.79032	0.804349	0.542374	0.417459	0.232842
D-dichotoma_M_contig291.10055.1	OG0009777	5.45797	3.52119	0	0	0	0	5.24204	0	2.62933	4.22163	0	4.0834	2.26827	3.70894	3.99638	3.62338	3.41826	2.95079	4.3004	4.18815	2.73296	2.72132	3.65434	3.25828	3.73829	2.57468	1.95953	NA	NA	NA	NA	NA	NA	NA	NA	NA	NA	NA	NA	NA	NA	NA	NA	NA	NA	NA	NA	NA
D-dichotoma_M_contig291.10061.1	OG0009778	0	0	0	0	0	0	0	0	2.62933	3.01127	0	0	2.52902	0.608885	1.16778	1.18808	0.927098	0.880852	1.84265	1.22805	0	0	1.62107	1.97501	1.2616	0.719506	0.609128	NA	NA	NA	NA	NA	NA	NA	NA	NA	NA	NA	NA	NA	NA	NA	NA	NA	NA	NA	NA	NA
D-dichotoma_M_contig291.10066.1	OG0009779	1.88155	0	0	0	0	0	0	0	0	2.17994	0	0	0	0.336329	2.07235	1.4026	1.59849	1.2645	1.48067	1.7913	0.853502	0	0.230207	0.537017	0.551757	0.517103	0.609128	NA	NA	NA	NA	NA	NA	NA	NA	NA	NA	NA	NA	NA	NA	NA	NA	NA	NA	NA	NA	NA
D-dichotoma_M_contig291.10073.1	OG0009780	8.4063	8.80235	8.19354	2.73491	0	0	8.86945	8.09781	8.97779	9.08966	8.09901	8.13012	7.50472	7.73383	7.81861	7.83536	7.31269	7.79275	7.80127	7.98395	7.52483	7.42481	8.13312	8.13469	7.99114	7.85834	7.48665	turquoise	-0.673886	0.892098	0.919918	0.374327	0.428146	-0.626724	-0.0864072	0.527231	0.296849	0.15422	0.000116433	4.15776e-10	1.16732e-11	0.0544023	0.0258824	0.000468977	0.668256	0.00471531	0.132681	0.442462
D-dichotoma_M_contig292.10104.1	OG0000672	4.49042	5.23588	5.28743	10.8584	11.1003	10.5694	5.73328	6.00821	6.71078	5.93152	4.97057	7.17562	6.78495	6.40515	5.99701	6.12254	5.8971	6.25116	6.44554	6.04194	4.84987	5.63984	6.40191	6.46004	6.08927	5.97407	5.51266	turquoise	0.688966	-0.837513	-0.899769	-0.304844	-0.508941	0.662784	0.165289	-0.485848	-0.305816	-0.0436103	7.07019e-05	5.09504e-08	1.72606e-10	0.122073	0.00670642	0.000165156	0.409988	0.010192	0.120828	0.828999
D-dichotoma_M_contig292.10109.1	OG0009781	2.67116	3.52119	0	5.84729	5.41954	7.24708	5.11997	0	0	3.01127	0	0	0	0	0	0	0	0	0	0	0	0	0	0	0	0	0	turquoise	0.810682	-0.483319	-0.835656	0.148646	-0.14259	0.215179	-0.156529	-0.435124	-0.620689	-0.148218	2.94893e-07	0.010652	5.81045e-08	0.459322	0.478016	0.281084	0.435576	0.023308	0.000551563	0.460631
D-dichotoma_M_contig292.10111.1	OG0009782	4.30692	0	0	12.489	8.29692	7.82887	5.11997	4.35734	0	5.7541	0	0	5.64129	6.00612	5.11519	3.85953	3.1518	5.48401	5.30021	5.29504	4.28971	3.0806	5.1816	5.93556	4.39454	3.65983	4.38976	blue	0.362663	-0.768657	-0.563265	-0.545652	-0.684476	0.654478	0.246895	-0.116732	0.131265	-0.141787	0.0630062	2.82551e-06	0.00221957	0.00324124	8.2269e-05	0.000212573	0.21441	0.56202	0.513996	0.480524
D-dichotoma_M_contig292.10112.1	OG0009783	3.55322	0	2.38634	11.232	10.0872	9.82411	0	0	0	2.17994	3.47482	0	2.89568	2.96828	2.07235	3.26066	2.77808	2.66204	3.02913	3.43897	2.54629	2.63733	3.1908	3.03835	2.72037	2.94143	2.76101	turquoise	0.603615	-0.909038	-0.844216	-0.464472	-0.523395	0.714416	0.191328	-0.368779	-0.157581	-0.0994012	0.000857705	5.40348e-11	3.12669e-08	0.0146558	0.00508496	2.84102e-05	0.339072	0.0583722	0.432459	0.621809
D-dichotoma_M_contig620.17100.1	OG0009784	0	2.64168	0	2.73491	0	0	2.02518	0	0	0	4.40844	5.04021	7.43084	5.53666	3.86148	4.6915	5.12119	6.21893	5.49738	5.44337	5.32675	6.51194	5.27481	5.28935	6.80577	5.41275	6.37421	yellow	-0.66697	-0.074805	0.526506	-0.622211	-0.209203	0.357375	0.424454	0.473106	0.846489	0.205755	0.000145007	0.710767	0.00478332	0.000529624	0.29498	0.0672381	0.027335	0.0126898	2.63578e-08	0.303191
D-dichotoma_M_contig620.17106.1	OG0009785	6.92851	7.04455	6.6184	3.62227	0	0	7.62576	7.61449	8.08079	8.59215	8.4722	7.70306	7.0019	7.0416	7.19829	7.26387	7.18668	6.21893	7.43724	6.98837	7.39599	7.06776	7.24823	7.20521	7.44738	6.65836	7.04804	turquoise	-0.669129	0.842272	0.890464	0.34242	0.447311	-0.525531	-0.0149379	0.552506	0.315502	0.292267	0.000135485	3.61065e-08	4.97134e-10	0.0804003	0.0193136	0.0048762	0.94105	0.00280399	0.108918	0.139054
D-dichotoma_M_contig623.17138.1	OG0000673	7.41055	7.78858	7.33696	13.0529	12.6145	12.2602	8.80159	6.758	7.84075	8.51068	7.59426	8.24836	9.1039	8.2163	8.60057	8.53541	7.90348	7.9807	8.42307	8.19143	7.54367	7.58191	8.36957	8.50344	8.227	8.16718	7.68567	turquoise	0.698127	-0.858379	-0.904868	-0.326361	-0.515384	0.697684	0.194976	-0.448552	-0.277724	-0.036025	5.14652e-05	1.02957e-08	9.24571e-11	0.0966282	0.00593672	5.22759e-05	0.329768	0.0189404	0.160741	0.858416
D-dichotoma_M_contig118.1445.1	OG0009786	0	0	0	0	0	0	0	0	0	0	0	0	0	0	0	0	0	0	0	0	0	0	0	0	0	0	0	NA	NA	NA	NA	NA	NA	NA	NA	NA	NA	NA	NA	NA	NA	NA	NA	NA	NA	NA	NA	NA
D-dichotoma_M_contig118.1456.1	OG0000674	6.30116	6.31485	6.67919	5.69807	6.7211	5.27529	8.30949	7.33851	8.16142	8.5655	8.69987	8.85678	9.70912	8.55625	9.34028	9.19522	8.82361	8.45668	8.34135	8.56659	9.73242	8.90662	8.49939	8.64018	8.74763	8.83154	9.09909	turquoise	-0.764005	0.307908	0.731355	-0.283496	0.129767	0.09527	0.351028	0.337283	0.739231	0.434347	3.52548e-06	0.118178	1.46548e-05	0.151865	0.51885	0.636434	0.0726041	0.0853473	1.05926e-05	0.023584
D-dichotoma_M_contig118.1458.1	OG0009787	3.17858	0	4.46868	0	0	0	3.35209	2.5544	2.62933	3.9189	0	0	4.98996	5.56093	4.67678	5.2646	5.65404	5.80673	4.9283	5.52275	4.94742	4.56998	4.90166	5.00526	5.06082	4.99196	4.75511	turquoise	-0.771773	0.184373	0.720171	-0.47762	-0.157419	-0.0240669	0.206393	0.509718	0.839819	-0.165212	2.42923e-06	0.357246	2.28083e-05	0.0117525	0.432936	0.905153	0.301661	0.0066094	4.31794e-08	0.410208
D-dichotoma_M_contig118.1460.1	OG0009788	4.09662	0	0	0	0	0	4.4914	0	0	3.53532	4.40844	3.16609	0	1.63242	0.617565	0.935998	0.536773	1.08539	2.25718	1.35967	2.44304	2.45307	0	0	0	0.281597	0	NA	NA	NA	NA	NA	NA	NA	NA	NA	NA	NA	NA	NA	NA	NA	NA	NA	NA	NA	NA	NA
D-dichotoma_M_contig1375.2770.1	OG0000675	6.89636	6.86162	6.26884	16.822	15.8607	16.2197	7.83423	7.57815	7.63024	8.69408	8.76843	9.22691	8.99815	8.24904	8.89745	8.60406	8.41583	8.42406	8.66079	8.93237	8.87342	8.4624	8.86856	8.28096	8.26792	8.36971	9.12918	blue	0.700796	-0.901079	-0.920802	-0.36479	-0.444746	0.735848	0.172836	-0.424004	-0.270137	0.0368392	4.68157e-05	1.47512e-10	1.02114e-11	0.0613628	0.0201038	1.21941e-05	0.388632	0.0275165	0.172961	0.855249
D-dichotoma_M_contig1378.2789.1	OG0009789	5.27	5.99745	5.28743	5.34342	6.7211	6.71082	5.24204	5.13421	5.72449	5.55175	5.68902	6.18557	7.19984	6.76691	7.74985	6.88578	6.4703	6.2982	6.55644	7.00354	6.59418	6.26145	6.76757	6.5461	6.47653	6.27241	5.97102	brown	-0.425447	-0.397521	0.130777	-0.726858	-0.547848	0.565726	0.436955	0.0784706	0.661974	0.0381957	0.0269379	0.0400407	0.515575	1.75529e-05	0.00309522	0.00210171	0.0226682	0.697238	0.000169329	0.849977
D-dichotoma_M_contig1379.2794.1	OG0009790	1.88155	0	0	0	0	0	2.02518	0	0	0	0	0	1.28187	0.336329	0	2.32715	1.23399	3.43524	0.483315	0.29131	0.488969	1.51849	0.230207	3.61756	2.43983	1.44589	0.609128	NA	NA	NA	NA	NA	NA	NA	NA	NA	NA	NA	NA	NA	NA	NA	NA	NA	NA	NA	NA	NA
D-dichotoma_M_contig247.8471.1	OG0009791	8.46229	8.83583	8.27457	2.73491	0	0	9.25742	8.98846	9.85231	9.49465	9.55023	9.48954	6.14786	7.06159	8.31211	7.24836	7.9237	5.57171	8.20012	7.44446	7.23531	5.93193	8.24348	6.81814	7.31647	7.21363	6.85532	blue	-0.505033	0.93465	0.795287	0.566881	0.532271	-0.659426	-0.125929	0.420068	0.0698218	0.267598	0.00721313	9.9726e-13	7.16427e-07	0.00204827	0.00426442	0.000183068	0.531392	0.0291457	0.729297	0.177193
D-dichotoma_M_contig247.8473.1	OG0009792	5.05383	5.42373	4.72082	0	0	0	6.677	5.13421	5.85951	5.93152	4.97057	5.04021	0.562846	1.63242	1.87634	0.630339	0.927098	0.642448	1.37396	2.04702	0	0	0	0.745413	0	0	0	brown	0.154221	0.767145	0.154699	0.966451	0.540285	-0.719436	-0.477912	-0.0883749	-0.655012	0.169681	0.442459	3.03795e-06	0.441029	2.84729e-16	0.00362317	2.34643e-05	0.011694	0.66114	0.000209202	0.397481
D-dichotoma_M_contig247.8480.1	OG0009793	7.84047	7.82238	7.70174	0	0	0	7.98171	7.54087	7.87303	8.07352	8.4722	8.24836	6.66797	7.0502	7.39887	6.98895	7.45845	6.50392	7.15454	6.93924	6.72098	6.66296	7.08501	6.71663	7.0177	6.60185	6.65555	blue	-0.683549	0.928947	0.918122	0.426799	0.485414	-0.640883	-0.0957371	0.444215	0.249572	0.219943	8.48571e-05	2.75033e-12	1.52527e-11	0.0264052	0.0102698	0.000316238	0.634774	0.0202709	0.209323	0.270312
D-dichotoma_M_contig248.8509.1	OG0000087	6.52795	5.23588	4.72082	5.34342	0	3.38293	7.18299	6.47145	5.0056	6.48033	3.47482	5.04021	0	1.20958	0	0.449203	1.08869	3.0022	3.75868	2.6713	0.488969	2.12329	2.31588	3.69496	1.92418	3.16591	1.20998	brown	0.420171	0.453857	-0.091355	0.783181	0.332973	-0.534562	-0.463307	0.0561569	-0.65877	0.0157466	0.0291024	0.0174114	0.650418	1.36859e-06	0.0896721	0.00407198	0.0149394	0.78085	0.00018676	0.937864
D-dichotoma_M_contig98.20452.1	OG0009794	2.67116	0	2.38634	0	0	0	4.27966	2.5544	2.62933	2.17994	4.40844	4.0834	0	1.50476	0	1.06754	0	0.880852	1.92055	1.69489	0.853502	0.804027	2.15706	2.46197	1.2616	2.00632	2.51804	NA	NA	NA	NA	NA	NA	NA	NA	NA	NA	NA	NA	NA	NA	NA	NA	NA	NA	NA	NA	NA
D-dichotoma_M_contig98.20457.1	OG0009795	4.09662	6.98611	2.38634	0	0	0	5.35458	3.42606	5.22156	6.16243	6.67497	5.61048	5.81642	6.3271	5.63284	4.52981	5.10239	5.20564	7.33071	8.10379	6.65897	5.65059	6.03409	5.67406	4.74716	4.67646	6.89725	turquoise	-0.70189	0.614602	0.837261	0.0545303	0.236118	-0.260508	0.00567518	0.468208	0.516801	0.320537	4.50189e-05	0.000647454	5.18709e-08	0.787052	0.235737	0.189391	0.977587	0.0137764	0.00577781	0.103083
D-dichotoma_M_contig98.20458.1	OG0009796	0	0	0	0	0	0	0	0	0	2.17994	0	0	0.308699	0.838041	0.236455	0.449203	0.927098	0	0.261803	0.29131	0	0	0	0	0	0	0	NA	NA	NA	NA	NA	NA	NA	NA	NA	NA	NA	NA	NA	NA	NA	NA	NA	NA	NA	NA	NA
D-dichotoma_M_contig98.20459.1	OG0009797	0	0	0	0	0	0	0	0	0	0	0	3.16609	1.41691	2.14177	1.64945	0.242014	1.36599	1.08539	1.84265	2.45287	0.853502	0.457315	0.75874	1.59901	0.949901	1.84257	0	NA	NA	NA	NA	NA	NA	NA	NA	NA	NA	NA	NA	NA	NA	NA	NA	NA	NA	NA	NA	NA
D-dichotoma_M_contig98.20460.1	OG0009798	3.17858	0	0	0	0	0	2.02518	3.42606	4.04982	5.7541	7.25521	6.18557	4.53536	3.27259	5.06235	3.78503	3.66889	3.57761	3.62546	3.97889	1.38613	2.3513	4.7336	3.29189	2.24091	3.53125	2.91967	blue	-0.43248	0.466114	0.546202	0.166865	0.125951	0.0267778	0.293349	0.292531	0.29423	0.725091	0.0242577	0.0142638	0.00320414	0.405474	0.531319	0.894525	0.137529	0.13868	0.136297	1.88246e-05
D-dichotoma_M_contig98.20462.1	OG0009799	3.85035	3.52119	5.5702	0	0	0	4.27966	4.91865	3.50777	6.01267	5.94738	6.01812	4.52044	3.10663	4.3639	3.98131	4.23294	2.38054	4.61348	4.03904	3.41719	2.63733	5.33788	3.61756	2.99784	3.05803	3.70959	blue	-0.481255	0.831246	0.724375	0.497917	0.419827	-0.48455	0.0061727	0.328328	0.0927698	0.428255	0.0110402	7.88804e-08	1.93627e-05	0.00821845	0.0292479	0.0104259	0.975623	0.0945177	0.64535	0.0258405
D-dichotoma_M_contig99.20515.1	OG0009800	2.67116	0	3.24132	3.62227	4.45286	3.38293	4.67601	3.42606	4.04982	0	0	0	0.778857	3.23286	3.50201	2.81295	2.82472	1.42381	4.4259	3.58061	2.73296	2.45307	3.61414	3.98932	2.31031	3.0202	5.28861	NA	NA	NA	NA	NA	NA	NA	NA	NA	NA	NA	NA	NA	NA	NA	NA	NA	NA	NA	NA	NA
D-dichotoma_M_contig99.20533.1	OG0009801	3.85035	5.01986	3.24132	7.41545	0	6.94971	5.73328	5.13421	4.75152	4.47172	4.40844	3.16609	1.54039	2.64404	3.22812	0.630339	0	1.42381	3.55394	2.39267	0.853502	1.08335	2.31588	2.87058	1.73524	1.44589	2.64463	green	0.651424	0.0466157	-0.408725	0.527628	0.0507266	-0.186267	-0.261719	0.140853	-0.667473	0.0133912	0.000232804	0.817403	0.0342806	0.00467832	0.801604	0.352241	0.187268	0.483447	0.000142737	0.947145
D-dichotoma_M_contig202.6414.1	OG0009802	5.16596	5.99745	4.93537	7.03469	5.99322	6.5747	4.98661	5.13421	4.44292	5.65647	3.47482	4.0834	6.79118	7.62867	6.52645	6.55405	7.53933	7.11311	7.11574	6.94449	5.66173	6.58102	7.83276	7.46477	7.51509	6.79904	5.98903	brown	-0.307018	-0.508339	0.0685266	-0.822726	-0.668119	0.512479	0.453934	0.286361	0.709151	-0.29297	0.1193	0.0067825	0.734139	1.39014e-07	0.000139867	0.00627405	0.0173901	0.14759	3.45737e-05	0.138061
D-dichotoma_M_contig203.6463.1	OG0009803	4.49042	4.06365	3.77451	6.60247	6.40259	5.27529	4.98661	2.5544	4.04982	5.43883	6.35656	4.0834	1.41691	3.82038	1.47557	2.88606	3.76768	2.84212	1.92055	1.59157	2.81795	2.45307	3.04721	3.1525	3.36701	1.84257	2.37926	turquoise	0.701502	-0.203101	-0.690482	0.418702	0.134201	0.128599	-0.0597975	-0.511246	-0.716501	0.264589	4.56494e-05	0.309609	6.71334e-05	0.0297292	0.504541	0.52265	0.767017	0.00642195	2.62534e-05	0.182301
D-dichotoma_M_contig203.6474.1	OG0009804	0	0	0	0	0	0	3.35209	0	0	0	3.47482	0	2.80007	4.35247	3.02215	3.44131	4.91033	3.09983	1.67299	1.69489	0.488969	2.24179	1.14471	5.42426	3.36701	1.84257	0.336476	NA	NA	NA	NA	NA	NA	NA	NA	NA	NA	NA	NA	NA	NA	NA	NA	NA	NA	NA	NA	NA
D-dichotoma_M_contig204.6510.1	OG0009805	7.24169	6.79509	6.34585	8.43499	7.71425	7.49351	5.89089	4.66512	6.09669	5.84553	6.35656	4.63971	7.10051	8.06893	8.24425	8.66375	8.012	8.4897	7.29825	7.04569	7.06755	7.23068	6.41074	8.22987	8.84731	7.99626	7.52625	brown	-0.162387	-0.573826	-0.0790947	-0.7739	-0.506118	0.530419	0.409535	0.12563	0.560886	-0.278294	0.418371	0.00175092	0.694943	2.18822e-06	0.00706927	0.00442564	0.0338914	0.532374	0.00233887	0.15985
D-dichotoma_M_contig204.6515.1	OG0009806	4.09662	2.64168	4.72082	6.51593	4.45286	7.41595	4.98661	4.91865	5.40936	5.93152	6.16643	6.18557	2.80007	2.76041	3.91356	1.75461	2.72989	3.82608	4.11404	3.34679	3.62016	1.69506	5.05218	4.65116	3.88197	3.65983	3.82104	turquoise	0.722149	-0.151156	-0.560386	0.401079	-0.0563535	0.147208	-0.0102192	-0.158653	-0.62395	0.369344	2.11244e-05	0.451686	0.00236465	0.0381333	0.780101	0.463725	0.959653	0.429293	0.000505493	0.0579577
D-dichotoma_M_contig204.6519.1	OG0009807	0	0	0	8.23281	8.19771	8.3712	0	0	0	0	0	4.63971	0.966698	0	1.94467	1.49898	0	1.08539	3.16335	2.76925	1.93512	1.51849	1.97858	1.59901	0.302097	2.40893	3.06259	turquoise	0.664473	-0.85598	-0.835924	-0.387755	-0.424426	0.700539	0.122414	-0.399607	-0.21197	-0.000782349	0.000156749	1.25294e-08	5.70191e-08	0.0456665	0.0273463	4.72463e-05	0.543002	0.0389135	0.288495	0.99691
D-dichotoma_M_contig1402.2998.1	OG0009808	7.0504	7.15477	7.13478	6.60247	6.7211	4.87262	6.49253	6.758	5.98297	4.87041	6.16643	7.09375	7.68948	6.8148	7.38817	7.25355	7.31064	7.4847	7.20794	7.38584	7.0848	7.23068	7.32184	7.47943	7.77956	7.31084	7.02786	turquoise	-0.630536	0.096952	0.513277	-0.416872	-0.233458	-0.0610672	0.13015	0.192349	0.605896	-0.331885	0.000422561	0.630463	0.00617981	0.0305254	0.241212	0.762208	0.517606	0.336452	0.000809755	0.0907905
D-dichotoma_M_contig1402.2999.1	OG0009809	6.86347	5.99745	6.6184	6.76137	7.39403	6.83521	5.81423	7.15333	6.6375	5.31632	5.37406	4.63971	8.47582	7.23504	8.25438	8.33048	8.22691	8.02331	7.72191	8.00923	7.83885	8.02774	7.86417	7.95365	8.17563	8.1801	8.03682	brown	-0.476049	-0.378861	0.249201	-0.841565	-0.453418	0.297548	0.281962	0.235209	0.775232	-0.458928	0.0120719	0.0513172	0.210023	3.80287e-08	0.017534	0.131728	0.154189	0.237599	2.04845e-06	0.0160462
D-dichotoma_M_contig1403.3006.1	OG0009810	7.77124	7.95016	8.47645	0	0	0	7.75442	7.71831	7.80773	7.80397	7.05022	7.80948	7.098	6.95877	7.02171	7.14417	7.39226	6.44476	7.57157	7.20075	6.72649	6.43318	7.35576	6.96076	6.92671	6.96752	6.60973	blue	-0.702158	0.912036	0.934066	0.380033	0.443742	-0.663184	-0.108822	0.462197	0.285976	0.111371	4.45895e-05	3.61355e-11	1.11098e-12	0.0505426	0.0204205	0.000163132	0.588985	0.0152138	0.14816	0.580235
D-dichotoma_M_contig1404.3010.1	OG0009811	5.62424	2.64168	4.46868	2.73491	0	4.31207	6.58771	3.96558	5.22156	5.65647	4.40844	0	3.61043	4.04351	3.63204	3.68614	3.41826	4.69841	5.30748	5.30324	4.80893	3.73427	4.99854	4.96417	4.05369	4.00789	3.27323	grey	-0.248587	0.364018	0.416981	0.124325	0.0285371	-0.310471	-0.226397	0.542762	0.180162	-0.0942029	0.211185	0.0619559	0.0304775	0.536677	0.887637	0.11499	0.256145	0.00344238	0.368525	0.640234
D-dichotoma_M_contig852.19316.1	OG0009812	7.98506	8.34835	7.89351	3.62227	0	3.38293	8.40406	7.81516	8.08079	8.23441	7.66789	7.90859	7.47794	7.96362	7.60032	7.4592	7.62911	7.7964	7.87893	7.52904	7.82095	7.94718	7.09052	7.73135	7.75488	7.56679	7.45676	turquoise	-0.684435	0.839301	0.91551	0.31717	0.434106	-0.606228	-0.11336	0.697494	0.323295	0.115746	8.2383e-05	4.48243e-08	2.22617e-11	0.106959	0.0236701	0.000802974	0.573445	5.26268e-05	0.0999876	0.565351
D-dichotoma_M_contig854.19329.1	OG0009813	4.79946	4.45696	5.5702	0	0	0	2.02518	4.91865	5.22156	4.87041	0	5.04021	4.02412	5.89594	4.67678	5.3446	5.63454	5.86343	5.23311	5.6439	5.82464	6.30293	5.30037	5.35441	5.23154	5.65416	5.66979	turquoise	-0.767712	0.498938	0.826746	-0.128628	0.182867	-0.38561	-0.0010021	0.484012	0.593292	-0.170587	2.9567e-06	0.00806745	1.06804e-07	0.522556	0.361255	0.0469822	0.996042	0.0105242	0.00110695	0.394929
D-dichotoma_M_contig856.19336.1	OG0000017	0	0	0	0	0	0	0	0	0	2.17994	0	0	0	1.36471	1.04863	1.29933	0	0	0	0	0	0	0	2.9569	1.73524	0	0.609128	NA	NA	NA	NA	NA	NA	NA	NA	NA	NA	NA	NA	NA	NA	NA	NA	NA	NA	NA	NA	NA
D-dichotoma_M_contig3179.10963.1	OG0009814	0	0	2.38634	0	0	0	0	0	0	4.22163	0	0	1.85778	1.36471	1.27784	1.49898	2.62838	0.880852	2.37253	1.88167	3.57203	1.69506	1.44892	1.48742	0.76452	1.19739	3.49109	NA	NA	NA	NA	NA	NA	NA	NA	NA	NA	NA	NA	NA	NA	NA	NA	NA	NA	NA	NA	NA
D-dichotoma_M_contig3183.10976.1	OG0009815	0	0	0	7.71641	5.41954	7.1546	2.02518	0	0	4.47172	3.47482	4.63971	2.52902	2.86809	2.924	3.28789	3.03766	2.66204	4.17887	5.13889	1.38613	2.3513	3.0167	3.32472	3.11883	3.23359	2.58273	blue	0.426215	-0.765621	-0.608222	-0.452674	-0.509297	0.903883	0.392532	-0.131359	0.0576854	0.394414	0.0266343	3.26646e-06	0.000763255	0.0177432	0.00666184	1.04586e-10	0.0428412	0.513689	0.775034	0.041767
D-dichotoma_M_contig3184.10980.1	OG0009816	0	2.64168	4.16295	8.75136	7.85112	9.69872	5.96367	3.42606	3.50777	4.47172	4.97057	3.16609	0	1.03574	0.617565	0	0	0.880852	2.71619	2.32985	1.38613	0	2.04056	3.94776	1.92418	2.81457	5.2191	green	0.922401	-0.477104	-0.8211	0.159635	-0.0850069	0.310744	-0.00833212	-0.425245	-0.608898	0.116931	7.98353e-12	0.0118567	1.54364e-07	0.426405	0.673337	0.114655	0.967099	0.0270186	0.000750193	0.561348
D-dichotoma_M_contig3186.10985.1	OG0009817	5.16596	4.45696	4.16295	10.4259	8.97327	8.45113	6.33684	5.32171	3.50777	5.93152	6.35656	5.35334	6.31281	5.79723	6.3487	6.97016	6.4849	5.977	5.46525	5.2785	6.44183	6.363	5.6073	5.69304	5.71366	6.30817	6.82221	blue	0.512105	-0.853585	-0.738828	-0.47726	-0.347337	0.756239	0.305609	-0.28605	-0.0476087	0.0799356	0.0063186	1.51894e-08	1.07729e-05	0.0118251	0.0758727	5.0463e-06	0.121093	0.14805	0.81358	0.691855
D-dichotoma_M_contig3188.10989.1	OG0009818	6.76007	5.58992	5.80653	4.87213	0	0	7.58019	5.48762	6.84703	6.6421	5.68902	5.04021	7.86511	8.51439	7.23286	7.22565	7.52528	7.05951	7.35195	7.18086	6.59418	6.47007	7.64975	7.24864	7.11545	6.17249	6.74659	turquoise	-0.766665	0.579106	0.869774	-0.0311014	0.107722	-0.30307	0.1212	0.663544	0.600779	0.0631917	3.10826e-06	0.00155047	3.84831e-09	0.877612	0.592777	0.124372	0.547042	0.000161323	0.000920762	0.754182
D-dichotoma_M_contig3190.11003.1	OG0009819	4.6532	2.64168	4.16295	0	0	3.38293	2.8361	2.5544	0	5.18244	0	5.35334	0	0.336329	1.04863	0.935998	1.70204	0.642448	1.76031	1.22805	2.21131	0.457315	1.84601	2.33877	2.16801	1.05499	1.6329	NA	NA	NA	NA	NA	NA	NA	NA	NA	NA	NA	NA	NA	NA	NA	NA	NA	NA	NA	NA	NA
D-dichotoma_M_contig3190.11004.1	OG0009820	1.88155	0	0	0	0	0	0	0	0	0	0	0	0	0	0	0	0	0	0	0.29131	0	0	0	0	0	0.719506	1.50522	NA	NA	NA	NA	NA	NA	NA	NA	NA	NA	NA	NA	NA	NA	NA	NA	NA	NA	NA	NA	NA
D-dichotoma_M_contig3190.11005.1	OG0009821	0	0	0	0	0	0	0	0	0	0	0	0	0	0	0	0	0	0	0	0	0.488969	0	0	0.293353	0.302097	0	0	NA	NA	NA	NA	NA	NA	NA	NA	NA	NA	NA	NA	NA	NA	NA	NA	NA	NA	NA	NA	NA
D-dichotoma_M_contig3193.11013.1	OG0009822	3.55322	2.64168	0	4.56247	0	4.87262	0	3.42606	0	3.01127	5.37406	4.63971	0	0	0	0	0	0	0	0	0	0	0	0	0	0	0.609128	NA	NA	NA	NA	NA	NA	NA	NA	NA	NA	NA	NA	NA	NA	NA	NA	NA	NA	NA	NA	NA
D-dichotoma_M_contig4291.13849.1	OG0009823	0	0	0	0	0	0	3.35209	0	0	5.31632	0	0	0	2.51746	1.87634	1.83066	0	0.642448	1.13347	1.08322	1.59321	1.08335	2.45893	0.927471	1.6306	0.517103	0	NA	NA	NA	NA	NA	NA	NA	NA	NA	NA	NA	NA	NA	NA	NA	NA	NA	NA	NA	NA	NA
D-dichotoma_M_contig4295.13851.1	OG0009824	0	0	0	0	5.99322	5.84779	4.4914	2.5544	0	3.53532	4.40844	4.63971	0.778857	0	0	0	0	0.642448	0	0.533566	0.488969	0	0	0	0	0.517103	0.336476	turquoise	0.576351	-0.172391	-0.56098	0.338557	0.0820455	0.214832	-0.0607292	-0.568844	-0.560577	0.444397	0.00165244	0.389874	0.00233406	0.0840995	0.684129	0.28188	0.763488	0.00196011	0.00235479	0.0202136
D-dichotoma_M_contig4298.13855.1	OG0009825	1.88155	0	0	4.87213	7.39403	4.87262	0	0	0	0	0	0	0	0	0	0	0	0	0.261803	0	0	0	0	0	0	0	0	turquoise	0.76234	-0.772329	-0.952645	-0.179421	-0.384148	0.482861	-0.0211474	-0.674945	-0.460413	-0.188198	3.81154e-06	2.36412e-06	1.96302e-14	0.370531	0.0478956	0.0107372	0.916616	0.000112528	0.0156634	0.347182
D-dichotoma_M_contig4298.13856.1	OG0009826	0	0	0	5.84729	11.0443	3.38293	0	0	0	0	0	0	0	0	0	0	0	0.642448	0.261803	0	0	0	0	0	0.551757	0	0	turquoise	0.656135	-0.745167	-0.883155	-0.226014	-0.393484	0.515069	0.0237563	-0.798465	-0.366236	-0.125982	0.000202255	8.2305e-06	1.06999e-09	0.256972	0.0422951	0.00597252	0.906371	6.0018e-07	0.0602653	0.531218
D-dichotoma_M_contig4299.13859.1	OG0009827	0	0	3.77451	0	0	0	2.8361	0	0	0	0	0	0	0	0	0	0	0	0	0	0	0	1.97858	0	0	0	0	NA	NA	NA	NA	NA	NA	NA	NA	NA	NA	NA	NA	NA	NA	NA	NA	NA	NA	NA	NA	NA
D-dichotoma_M_contig4308.13900.1	OG0000015	0	0	0	0	0	0	0	0	0	0	0	0	0	0	0.617565	0	0	0	0	0.533566	0	0	0.230207	0	0.302097	0	0	NA	NA	NA	NA	NA	NA	NA	NA	NA	NA	NA	NA	NA	NA	NA	NA	NA	NA	NA	NA	NA
D-dichotoma_M_contig4310.13916.1	OG0009828	0	0	0	0	0	0	0	0	0	0	0	0	0	0	0	1.67433	1.08869	0	0	0	0	0	0	0	0	0.896975	0	NA	NA	NA	NA	NA	NA	NA	NA	NA	NA	NA	NA	NA	NA	NA	NA	NA	NA	NA	NA	NA
D-dichotoma_M_contig1895.5725.1	OG0009829	6.56932	6.31485	6.10125	4.56247	0	3.38293	6.63305	7.24889	7.08611	5.55175	3.47482	4.63971	8.54933	7.88729	9.6495	9.38333	8.49366	10.4265	11.0746	11.5504	7.84393	8.75171	8.25496	9.7038	10.0981	7.66505	7.2803	turquoise	-0.780288	0.25643	0.753861	-0.392639	-0.228447	-0.0974688	0.0384754	0.701619	0.770228	-0.202388	1.58799e-06	0.196663	5.61723e-06	0.0427794	0.25175	0.628633	0.848891	4.54584e-05	2.61898e-06	0.311345
D-dichotoma_M_contig1896.5728.1	OG0009830	4.93224	4.06365	5.43573	8.52637	7.56301	7.82887	5.96367	5.63641	6.71078	7.25596	7.8686	7.52709	5.09441	5.37265	6.10919	6.39721	6.42939	5.26998	5.20225	4.98431	5.31217	5.21643	5.8858	5.43933	5.45483	5.29888	5.52094	turquoise	0.627162	-0.427686	-0.68677	0.117629	-0.012237	0.513471	0.222664	-0.34023	-0.460684	0.526443	0.000463418	0.0260598	7.61649e-05	0.558998	0.951695	0.00615702	0.264279	0.0824811	0.0155945	0.00478931
D-dichotoma_M_contig1896.5729.1	OG0009831	6.39619	7.15477	6.00954	0	0	0	8.05016	7.2944	7.80773	7.93466	8.69987	7.32663	4.64948	6.06953	5.2961	5.22992	5.12119	4.91508	5.45874	4.75249	5.43834	5.45592	5.59702	5.62216	5.52219	5.37578	4.99977	blue	-0.476744	0.96451	0.768278	0.636403	0.598901	-0.692988	-0.168428	0.319377	0.00582475	0.326435	0.0119298	5.68985e-16	2.87745e-06	0.000358988	0.000964712	6.15859e-05	0.401027	0.104407	0.976997	0.0965476
D-dichotoma_M_contig1898.5738.1	OG0009832	0	4.76569	3.77451	0	0	0	3.35209	2.5544	4.04982	3.9189	4.40844	0	2.52902	2.7034	2.7818	2.95564	2.62838	1.56726	1.92055	1.88167	0	1.85235	3.3944	3.22388	2.99784	3.39008	3.34956	NA	NA	NA	NA	NA	NA	NA	NA	NA	NA	NA	NA	NA	NA	NA	NA	NA	NA	NA	NA	NA
D-dichotoma_M_contig1899.5740.1	OG0009833	2.67116	2.64168	0	0	0	0	4.4914	2.5544	0	2.17994	3.47482	0	2.40453	1.85814	0.439558	0.449203	0	1.42381	0.6753	0.740931	2.73296	3.60757	1.53756	0.745413	1.11415	0.281597	2.8687	NA	NA	NA	NA	NA	NA	NA	NA	NA	NA	NA	NA	NA	NA	NA	NA	NA	NA	NA	NA	NA
D-dichotoma_M_contig726.18141.1	OG0009834	3.17858	0	0	6.10614	4.45286	0	2.8361	0	0	3.01127	0	0	0.308699	0	0	0	0	0	0	0.533566	0	0	0	0.537017	0	0	0	turquoise	0.61586	-0.361755	-0.648852	0.123678	-0.183403	0.220149	-0.077628	-0.49158	-0.444643	-0.0354731	0.000626526	0.0637179	0.000251138	0.538814	0.359826	0.269852	0.70034	0.00921037	0.0201361	0.860564
D-dichotoma_M_contig726.18142.1	OG0009835	0	0	0	0	0	0	0	0	0	0	0	0	0	0	0	0	0	0	0	0	0	0	0	0	0	0	0	NA	NA	NA	NA	NA	NA	NA	NA	NA	NA	NA	NA	NA	NA	NA	NA	NA	NA	NA	NA	NA
D-dichotoma_M_contig726.18146.1	OG0009836	0	0	0	0	0	0	0	0	0	0	0	4.0834	0	0	0.236455	0	0	0	0	0	0	0	0	1.23445	0.551757	0	0	NA	NA	NA	NA	NA	NA	NA	NA	NA	NA	NA	NA	NA	NA	NA	NA	NA	NA	NA	NA	NA
D-dichotoma_M_contig726.18147.1	OG0009837	5.62424	6.72535	4.93537	5.12693	0	0	6.03296	3.96558	5.72449	5.03484	4.40844	4.0834	0	1.36471	2.66513	2.77496	2.33814	0.880852	2.52993	2.32985	1.14426	1.85235	0.603131	4.06901	2.99784	4.45334	2.22569	brown	0.236933	0.587921	0.120722	0.74731	0.535909	-0.606737	-0.282199	0.0884357	-0.506225	0.015303	0.234078	0.00125985	0.548635	7.5015e-06	0.00396225	0.000792654	0.153828	0.660921	0.00705532	0.939612
D-dichotoma_M_contig726.18148.1	OG0009838	0	0	0	0	0	0	0	0	0	0	0	0	0.966698	1.03574	0.439558	1.29933	1.23399	0.642448	0.261803	0	2.21131	0	0.75874	0.293353	0.302097	0.896975	0.336476	NA	NA	NA	NA	NA	NA	NA	NA	NA	NA	NA	NA	NA	NA	NA	NA	NA	NA	NA	NA	NA
D-dichotoma_M_contig726.18153.1	OG0009839	7.85727	5.23588	6.10125	0	0	0	7.64802	5.32171	5.85951	5.55175	0	3.16609	4.97909	5.63901	7.53255	4.84608	4.73829	2.7246	5.7315	4.44684	3.57203	2.94743	2.74612	1.23445	2.31031	1.75315	0.609128	blue	-0.412382	0.658375	0.512485	0.409231	0.19229	-0.641002	-0.386204	0.227608	-0.0209734	-0.271399	0.0325516	0.000189014	0.00627323	0.0340371	0.336603	0.000315167	0.046615	0.253543	0.9173	0.170886
D-dichotoma_M_contig726.18154.1	OG0009840	4.6532	0	3.24132	4.16764	0	3.38293	4.03141	0	4.04982	4.22163	4.40844	0	1.85778	2.7034	4.3131	3.28789	2.46133	1.08539	3.55394	3.17872	2.97425	0.804027	3.69346	2.73056	2.01012	3.98843	2.58273	NA	NA	NA	NA	NA	NA	NA	NA	NA	NA	NA	NA	NA	NA	NA	NA	NA	NA	NA	NA	NA
D-dichotoma_M_contig728.18160.1	OG0009841	6.72388	6.11119	5.9116	0	0	4.31207	5.89089	6.21167	5.57551	6.16243	6.16643	5.04021	5.18235	5.90861	5.3663	5.05865	5.09289	4.78902	4.97468	4.71611	4.06473	4.61459	5.42179	5.49088	5.70724	5.40543	5.05781	turquoise	-0.488896	0.818722	0.768713	0.432193	0.38829	-0.636825	-0.0371861	0.537616	0.138604	0.100628	0.00965965	1.79594e-07	2.81788e-06	0.0243626	0.0453428	0.000354747	0.8539	0.00382691	0.490528	0.617493
D-dichotoma_M_contig728.18161.1	OG0000676	8.31196	8.50223	8.89048	15.8356	16.6052	15.9241	8.01634	8.82752	9.21034	9.8932	10.7147	9.87986	9.10703	7.50066	8.61572	8.21374	8.83291	8.86173	9.37415	9.75191	10.1372	10.0431	8.73904	7.93782	7.92769	9.10718	9.86728	turquoise	0.767021	-0.786817	-0.945602	-0.179918	-0.257859	0.563193	-0.0416165	-0.546658	-0.456646	0.022508	3.05593e-06	1.13173e-06	1.06911e-13	0.369184	0.194093	0.00222309	0.836711	0.00317366	0.0166491	0.911272
D-dichotoma_M_contig728.18162.1	OG0009842	5.5435	5.87397	6.26884	13.7066	14.1117	13.3734	6.44248	6.88242	8.3567	7.70977	9.17424	8.35764	6.24182	4.40705	5.67871	4.70166	5.12119	6.03985	6.55339	6.76023	5.55435	5.67186	6.02645	4.33387	4.17027	5.65416	6.44986	turquoise	0.849901	-0.616891	-0.940466	0.0679394	-0.18534	0.432935	-0.116467	-0.573824	-0.637501	0.111446	2.02937e-08	0.000609818	3.21073e-13	0.736337	0.354685	0.024092	0.562916	0.001751	0.000348065	0.579979
D-dichotoma_M_contig728.18163.1	OG0009843	6.19942	6.86162	6.89957	13.8193	14.157	13.6712	6.677	7.87629	8.21277	7.38348	9.14875	8.24836	6.91329	4.7684	6.3768	4.65012	5.81285	5.78487	6.60443	7.10082	6.1207	5.25921	6.08645	4.57131	3.63387	5.20083	5.56162	turquoise	0.836304	-0.583831	-0.938435	0.108604	-0.195329	0.365338	-0.176726	-0.571499	-0.683226	0.0372645	5.55109e-08	0.00138823	4.82897e-13	0.589734	0.328875	0.0609451	0.377877	0.00184611	8.57764e-05	0.853595
D-dichotoma_M_contig728.18164.1	OG0000125	4.09662	4.76569	4.93537	9.39704	9.51668	8.19667	5.11997	3.42606	4.44292	5.65647	3.47482	0	2.19499	2.64404	2.85465	3.60184	3.07672	3.19127	4.06343	4.20575	3.52224	2.3513	2.98552	3.71986	2.66846	2.46632	4.38976	turquoise	0.801565	-0.602113	-0.862596	-0.0203335	-0.235361	0.293255	-0.163848	-0.520592	-0.524943	-0.241476	5.03481e-07	0.000890614	7.22648e-09	0.919815	0.237287	0.137661	0.414138	0.00537037	0.00493291	0.224966
D-dichotoma_M_contig729.18169.1	OG0009844	0	0	2.38634	0	0	0	0	0	0	0	0	0	0	0	0	0.242014	0	0	0	0	0	0	0	0	0	0	0	NA	NA	NA	NA	NA	NA	NA	NA	NA	NA	NA	NA	NA	NA	NA	NA	NA	NA	NA	NA	NA
D-dichotoma_M_contig729.18170.1	OG0009845	5.97151	6.11119	5.9116	0	0	0	6.63305	6.5486	6.30033	9.19772	8.69987	8.58441	6.21427	6.52515	5.58547	5.47473	6.65908	5.18354	5.95156	5.61125	6.50086	6.11387	5.68697	5.43181	5.41601	5.44166	5.4005	blue	-0.613749	0.886279	0.824513	0.476326	0.544009	-0.526638	-0.0499568	0.376704	0.178991	0.459164	0.000661997	7.75962e-10	1.23748e-07	0.0120151	0.00335435	0.00477086	0.804557	0.0527672	0.371697	0.0159848
D-dichotoma_M_contig730.18182.1	OG0000336	0	2.64168	2.38634	2.73491	6.7211	0	2.8361	0	0	8.31661	8.09901	8.28572	8.17482	7.49438	7.97996	7.68341	8.22366	8.02797	7.42727	7.77435	8.23052	8.21866	7.2839	7.12824	7.61789	7.59923	8.19001	yellow	-0.568467	-0.0803474	0.402481	-0.515477	-0.142736	0.495296	0.504791	0.100408	0.739365	0.530127	0.00197677	0.690345	0.0374023	0.00592618	0.47756	0.00861728	0.00724548	0.618264	1.05334e-05	0.00445154
D-dichotoma_M_contig730.18183.1	OG0000677	5.84245	0	6.48855	4.87213	4.45286	4.87262	5.11997	5.48762	5.57551	5.84553	5.37406	6.18557	9.01155	7.28932	7.17537	8.96678	9.45461	7.83235	7.30371	7.57547	9.04521	9.43414	8.43882	7.7206	7.96448	9.52143	9.23861	yellow	-0.602574	-0.101067	0.486769	-0.626984	-0.0907819	0.300951	0.409849	0.423131	0.817268	0.0980794	0.00088041	0.61595	0.0100286	0.000465674	0.652474	0.127158	0.0337414	0.0278713	1.96787e-07	0.626473
D-dichotoma_M_contig4229.13721.1	OG0009846	6.52795	6.40683	6.55494	0	0	0	7.85351	7.50261	8.77064	8.98295	8.83387	8.75392	6.66458	6.64732	6.52086	6.39408	5.93479	7.29932	5.65381	5.9921	8.20115	7.64779	5.52838	6.70733	6.81774	6.01311	6.1996	turquoise	-0.648415	0.887178	0.849533	0.445094	0.547386	-0.594213	-0.141898	0.392403	0.201661	0.33729	0.000254375	7.06258e-10	2.08797e-08	0.0199951	0.00312546	0.00108241	0.480175	0.0429157	0.313123	0.0853396
D-dichotoma_M_contig4246.13749.1	OG0009847	2.67116	0	0	0	0	0	2.02518	0	0	2.17994	0	0	0	0	0.236455	0	0	0	0	0.533566	0	0.457315	0.230207	1.08911	0.949901	0	0	NA	NA	NA	NA	NA	NA	NA	NA	NA	NA	NA	NA	NA	NA	NA	NA	NA	NA	NA	NA	NA
D-dichotoma_M_contig4248.13752.1	OG0009848	0	0	0	0	0	0	2.02518	0	0	2.17994	0	0	3.46216	2.81525	1.8046	3.0541	2.46133	2.59664	3.22605	3.70957	0	2.45307	2.4128	1.70259	2.16801	2.34915	3.06259	NA	NA	NA	NA	NA	NA	NA	NA	NA	NA	NA	NA	NA	NA	NA	NA	NA	NA	NA	NA	NA
D-dichotoma_M_contig4248.13753.1	OG0009849	3.85035	0	0	4.16764	0	0	5.81423	0	0	7.28891	0	0	5.20119	7.48595	6.44622	6.10733	5.62139	5.91128	6.67917	6.56267	4.63244	5.15735	6.07908	6.64368	5.78243	5.43449	5.52094	yellow	-0.530348	-0.0579305	0.464507	-0.547141	-0.33799	0.320447	0.397332	0.476303	0.810319	0.0861466	0.0044319	0.774102	0.0146474	0.00314165	0.0846524	0.103185	0.0401438	0.0120199	3.01392e-07	0.669201
D-dichotoma_M_contig4251.13776.1	OG0009850	0	0	0	0	0	0	0	0	0	0	0	0	0	0	0	0	0	0	0	0	0	0	0	0	0	0.281597	0	NA	NA	NA	NA	NA	NA	NA	NA	NA	NA	NA	NA	NA	NA	NA	NA	NA	NA	NA	NA	NA
D-dichotoma_M_contig4251.13778.1	OG0009851	1.88155	0	2.38634	5.34342	8.09117	6.71082	5.24204	2.5544	5.22156	2.17994	0	0	1.65412	3.06197	2.44688	3.14627	1.88922	2.30066	2.37253	2.39267	0.488969	0	1.91382	2.9982	2.66846	1.65782	2.51804	turquoise	0.644359	-0.593389	-0.725099	-0.155348	-0.397287	0.370501	0.0376156	-0.495194	-0.308629	-0.250371	0.000286214	0.00110435	1.88184e-05	0.439091	0.0401684	0.0571165	0.852231	0.00863312	0.117274	0.20782
D-dichotoma_M_contig4252.13780.1	OG0009852	7.41055	4.76569	4.72082	5.34342	7.39403	4.31207	7.75442	3.42606	3.50777	6.83293	3.47482	3.16609	1.54039	0.336329	0.236455	0	0	2.21609	0.996303	1.48027	1.38613	2.54814	0.75874	2.20406	2.16801	0.896975	0.336476	yellow	0.648901	0.0622181	-0.536913	0.626933	0.144024	-0.278207	-0.441873	-0.55576	-0.810352	-0.0714489	0.000250774	0.757857	0.00388214	0.000466321	0.473555	0.159985	0.0210202	0.00261475	3.00808e-07	0.72323
D-dichotoma_M_contig4252.13781.1	OG0009853	6.56932	5.73892	6.34585	0	0	0	6.09907	6.11352	5.22156	4.87041	5.94738	3.16609	5.65501	5.77665	7.78639	4.38599	1.08869	1.2645	2.71619	3.0676	1.59321	0.804027	1.97858	0	0.76452	0	0	blue	-0.195616	0.688787	0.342946	0.642438	0.258004	-0.621244	-0.314765	0.0873133	-0.307951	0.00176745	0.328152	7.11338e-05	0.0799057	0.00030248	0.193833	0.000543477	0.109793	0.664976	0.118124	0.993019
D-dichotoma_M_contig1639.4439.1	OG0000678	7.18957	6.21661	7.73074	14.2084	13.9724	13.798	6.33684	7.50261	6.91062	7.07886	7.43467	6.91458	7.48564	6.5169	6.83403	6.83128	6.5865	7.0746	6.66226	6.64883	7.36101	7.44965	6.81046	6.81814	6.31709	6.67062	8.06256	turquoise	0.793059	-0.824116	-0.969185	-0.215884	-0.338957	0.530563	0.011869	-0.51064	-0.45122	-0.132729	8.09622e-07	1.27005e-07	9.9853e-17	0.279474	0.0837098	0.00441298	0.953146	0.00649582	0.0181581	0.50927
D-dichotoma_M_contig1640.4456.1	OG0009854	0	0	0	8.52637	5.41954	7.1546	0	0	0	0	0	0	0	0	0	0.791248	0	0	0	0	0	0	0.230207	1.70259	0	1.65782	1.75018	turquoise	0.801429	-0.860705	-0.920229	-0.3052	-0.360356	0.603962	0.166734	-0.332466	-0.334219	-0.12552	5.07406e-07	8.48136e-09	1.11396e-11	0.121616	0.0648264	0.000850264	0.405848	0.0901922	0.0884054	0.532738
D-dichotoma_M_contig1641.4462.1	OG0009855	0	2.64168	0	0	0	0	0	0	0	0	0	0	1.13287	2.51746	1.72911	0.449203	1.79866	1.69773	1.76031	1.22805	0.853502	0.457315	2.36515	1.36647	1.51777	0.896975	1.0361	NA	NA	NA	NA	NA	NA	NA	NA	NA	NA	NA	NA	NA	NA	NA	NA	NA	NA	NA	NA	NA
D-dichotoma_M_contig1642.4464.1	OG0009856	4.30692	0	5.12211	0	0	0	5.24204	2.5544	2.62933	4.22163	4.40844	4.0834	5.83463	6.65861	6.0829	5.45083	4.97379	5.97056	6.0631	6.31355	4.16547	3.77415	6.80823	6.81814	6.42271	4.78195	4.79661	turquoise	-0.756776	0.373625	0.792798	-0.251508	-0.176413	-0.00350324	0.328263	0.516191	0.750829	0.204201	4.92476e-06	0.0548927	8.21219e-07	0.205695	0.378737	0.986164	0.0945875	0.00584577	6.42896e-06	0.306938
D-dichotoma_M_contig1642.4465.1	OG0009857	4.30692	0	0	0	0	0	4.83965	2.5544	4.04982	4.22163	4.97057	4.63971	6.70473	6.84477	6.38605	5.5328	4.30049	6.0521	6.385	6.43791	4.65572	3.60757	6.99004	7.05184	6.64717	4.98215	4.42547	turquoise	-0.7265	0.285501	0.727731	-0.306703	-0.227866	0.133606	0.385087	0.48872	0.774468	0.341252	1.78039e-05	0.148864	1.69528e-05	0.119699	0.252989	0.506449	0.0473074	0.00968982	2.12767e-06	0.0815055
D-dichotoma_M_contig1642.4466.1	OG0009858	5.97151	5.01986	5.6932	2.73491	0	0	7.50902	6.11352	5.57551	6.6421	5.94738	5.82865	6.38048	7.01842	6.53201	7.27412	6.65586	6.63998	6.75555	7.10551	7.04128	5.90524	7.42275	6.96858	6.83255	6.6858	6.36505	turquoise	-0.792736	0.684808	0.941866	0.0532143	0.236531	-0.358023	0.0982988	0.6243	0.584418	0.17919	8.24022e-07	8.13598e-05	2.40278e-13	0.792079	0.234897	0.0667079	0.625698	0.000500744	0.00136914	0.371157
D-dichotoma_M_contig1642.4470.1	OG0009859	0	0	0	0	0	0	0	0	0	0	0	0	2.94121	3.192	2.7818	2.84997	0.745095	2.59664	3.39929	2.72111	2.89822	2.87592	3.1908	2.77876	2.81891	1.44589	2.704	NA	NA	NA	NA	NA	NA	NA	NA	NA	NA	NA	NA	NA	NA	NA	NA	NA	NA	NA	NA	NA
D-dichotoma_M_contig2203.7355.1	OG0009860	5.62424	5.01986	4.46868	0	0	0	5.73328	5.77127	6.39229	6.6421	6.16643	6.8159	7.94829	7.81176	8.24679	9.2073	9.15092	8.08273	7.53335	7.9254	8.64387	8.60188	8.51516	7.77359	7.80683	8.9215	8.71319	turquoise	-0.883093	0.505984	0.936437	-0.207842	0.212073	-0.177274	0.23319	0.571785	0.771659	0.189819	1.07668e-09	0.00708695	7.12105e-13	0.298204	0.288253	0.376378	0.241767	0.00183417	2.44291e-06	0.342969
D-dichotoma_M_contig2205.7363.1	OG0009861	1.88155	0	0	0	0	0	2.8361	0	0	3.01127	0	0	1.41691	1.50476	1.04863	1.29933	0.293208	1.2645	2.47935	1.69489	0.488969	0.457315	0.603131	0.537017	0.76452	0	1.20998	NA	NA	NA	NA	NA	NA	NA	NA	NA	NA	NA	NA	NA	NA	NA	NA	NA	NA	NA	NA	NA
D-dichotoma_M_contig2205.7364.1	OG0000008	0	0	0	0	0	0	2.02518	0	0	0	0	0	1.65412	2.14177	0.918746	0.449203	0.745095	1.69773	2.13179	2.32985	0	0.457315	0.75874	0.293353	0.949901	0.896975	0	NA	NA	NA	NA	NA	NA	NA	NA	NA	NA	NA	NA	NA	NA	NA	NA	NA	NA	NA	NA	NA
D-dichotoma_M_contig2205.7367.1	OG0009862	0	0	0	2.73491	0	0	3.35209	0	0	3.01127	0	0	1.54039	2.81525	1.38009	2.47666	3.53506	1.92785	1.76031	2.56621	1.14426	1.51849	2.74612	2.62904	2.77048	3.0202	1.36514	NA	NA	NA	NA	NA	NA	NA	NA	NA	NA	NA	NA	NA	NA	NA	NA	NA	NA	NA	NA	NA
D-dichotoma_M_contig2206.7370.1	OG0009863	0	0	0	2.73491	0	0	0	0	0	0	0	0	0	0	0	0	0	0	0	0	0	0	0	0	0	0	0	NA	NA	NA	NA	NA	NA	NA	NA	NA	NA	NA	NA	NA	NA	NA	NA	NA	NA	NA	NA	NA
D-dichotoma_M_contig2207.7374.1	OG0000679	8.41768	8.67865	8.83812	6.51593	0	3.38293	8.26699	8.85815	8.48756	8.99298	8.89647	9.14797	8.29147	8.36731	8.72783	9.24427	8.82504	9.33441	8.69583	8.77842	9.22325	8.92113	8.08246	8.73025	8.81633	8.59711	7.8589	turquoise	-0.698057	0.726027	0.867402	0.211111	0.36488	-0.474488	-0.065023	0.763785	0.374681	0.153965	5.15924e-05	1.81411e-05	4.75804e-09	0.290497	0.0612941	0.0123964	0.747284	3.56213e-06	0.0541559	0.443225
D-dichotoma_M_contig2208.7381.1	OG0009864	0	0	0	0	0	0	0	0	0	2.17994	0	0	0	0	0	2.10016	2.57482	0	0.261803	0	1.77427	2.12329	0.428685	0	0	0.719506	1.75018	NA	NA	NA	NA	NA	NA	NA	NA	NA	NA	NA	NA	NA	NA	NA	NA	NA	NA	NA	NA	NA
D-dichotoma_M_contig2211.7394.1	OG0009865	5.05383	4.06365	5.12211	8.82519	9.51668	8.63351	4.03141	4.91865	4.44292	4.68479	5.94738	4.0834	4.93476	4.38909	3.08406	2.32715	2.77808	5.00603	2.31601	2.76925	3.30388	4.81905	4.39701	3.94776	5.8597	3.68422	2.91967	turquoise	0.71236	-0.591181	-0.866416	0.0191665	-0.322266	0.320876	-0.0135668	-0.557126	-0.56265	-0.0773993	3.06897e-05	0.00116501	5.19073e-09	0.924404	0.101134	0.102698	0.946453	0.00253865	0.00224991	0.701183
D-dichotoma_M_contig2211.7395.1	OG0009866	6.60954	3.52119	5.28743	7.79201	8.71081	8.45113	5.35458	3.96558	0	5.7541	0	0	6.18144	5.98236	4.77389	4.25411	5.11182	6.07028	3.89998	3.40889	5.02096	5.31435	4.69557	5.74249	6.42271	5.17524	4.11149	blue	0.249745	-0.647231	-0.470508	-0.489164	-0.5447	0.368666	0.161519	-0.205057	0.0951956	-0.460385	0.208997	0.000263331	0.013257	0.00961402	0.00330637	0.058455	0.420896	0.304871	0.636698	0.0156707
D-dichotoma_M_contig1420.3090.1	OG0009867	0	0	0	2.73491	5.99322	0	0	0	0	0	0	0	0	0	0	0.449203	0	0.356693	1.48067	1.69489	0	0	0.75874	0.293353	0.551757	0	0.609128	turquoise	0.44353	-0.620349	-0.65092	-0.294276	-0.451233	0.499904	0.0115235	-0.768836	-0.152463	-0.0959015	0.0204878	0.000556579	0.000236299	0.136233	0.0181545	0.00792668	0.954508	2.80125e-06	0.447738	0.63419
D-dichotoma_M_contig1421.3094.1	OG0009868	1.88155	2.64168	0	6.32554	4.45286	5.84779	0	2.5544	0	2.17994	4.97057	5.04021	1.54039	0.608885	2.07235	3.66552	2.99751	2.12626	1.84265	2.72111	0.488969	0	2.85362	1.70259	0.76452	2.2868	2.22569	turquoise	0.573638	-0.534205	-0.653107	-0.0743514	-0.195664	0.569462	0.241412	-0.238509	-0.327532	0.341287	0.00175843	0.00410146	0.000221456	0.712448	0.32803	0.00193306	0.225091	0.23089	0.0953673	0.0814719
D-dichotoma_M_contig1421.3095.1	OG0009869	1.88155	2.64168	3.77451	6.42387	7.39403	6.71082	2.8361	3.42606	4.04982	3.53532	4.40844	5.82865	2.11778	1.95901	2.924	4.24024	3.22317	2.52814	3.19504	3.46843	2.33182	2.3513	2.95366	1.36647	1.73524	2.81457	3.19262	turquoise	0.746762	-0.53648	-0.840158	0.0833805	-0.05064	0.437697	-0.0455641	-0.563511	-0.588583	0.198202	7.68233e-06	0.00391654	4.21323e-08	0.679257	0.801936	0.0224132	0.821457	0.00220756	0.00124007	0.321669
D-dichotoma_M_contig1421.3097.1	OG0009870	4.30692	5.23588	3.77451	9.05738	8.63699	9.77835	4.27966	4.91865	7.33815	6.78754	7.15635	8.13012	5.83463	5.90861	6.31037	7.2673	6.68142	5.65437	6.40547	6.8243	5.89479	5.39329	6.35999	5.81939	4.80841	6.5229	6.23525	turquoise	0.531942	-0.681664	-0.684312	-0.26483	-0.21953	0.737593	0.26841	-0.274909	-0.18417	0.375767	0.00429269	9.03416e-05	8.2722e-05	0.181887	0.271235	1.13429e-05	0.175833	0.165203	0.357787	0.0534071
D-dichotoma_M_contig1421.3101.1	OG0009871	4.6532	5.73892	4.16295	7.75471	8.78103	8.19667	3.35209	3.42606	6.39229	5.65647	6.16643	6.33559	5.25626	6.18856	5.48579	6.62785	5.77178	5.52852	6.13021	6.52461	5.7509	6.22595	5.86453	6.04307	5.47008	6.21915	6.68163	blue	0.422158	-0.778697	-0.631886	-0.488621	-0.309683	0.760246	0.298491	-0.364778	0.00817321	0.172185	0.0282713	1.72173e-06	0.000407124	0.0097068	0.115964	4.20066e-06	0.13045	0.0613721	0.967726	0.390448
D-dichotoma_M_contig2193.7288.1	OG0000680	2.67116	0	2.38634	11.4721	10.7261	11.8267	2.02518	2.5544	2.62933	4.47172	4.40844	5.35334	0	0.838041	0	0.242014	0	0	1.25872	0.533566	0	0	2.15706	4.66405	0.76452	5.28299	6.31357	green	0.91813	-0.630699	-0.872674	-0.00806722	-0.150365	0.473154	0.190564	-0.458956	-0.506815	0.142707	1.52335e-11	0.000420671	2.95189e-09	0.968145	0.454087	0.0126796	0.341041	0.016039	0.00697829	0.477651
D-dichotoma_M_contig2193.7289.1	OG0009872	5.7007	5.23588	3.24132	8.65342	7.85112	8.96836	4.4914	5.32171	5.98297	4.47172	5.94738	0	7.21845	7.16022	6.78827	7.37757	7.53583	6.12349	6.68197	6.39252	6.30866	6.54113	6.84126	6.93972	6.9756	7.5048	6.51346	brown	0.0983983	-0.707796	-0.32615	-0.716934	-0.496293	0.551823	0.314188	0.0309021	0.348267	-0.30185	0.625347	3.63413e-05	0.0968561	2.58245e-05	0.00846377	0.0028452	0.110481	0.87839	0.0750391	0.12597
D-dichotoma_M_contig2194.7290.1	OG0009873	1.88155	0	0	0	0	0	3.35209	3.42606	2.62933	2.17994	0	0	7.22076	5.25855	6.45796	2.32715	3.96795	4.75944	1.67299	1.22805	4.25964	3.99271	7.29189	3.94776	5.08082	5.33013	4.66836	turquoise	-0.618421	0.0772273	0.563822	-0.466659	-0.221123	0.0516118	0.450659	0.418298	0.746278	-0.071343	0.000585734	0.701817	0.00219242	0.0141356	0.267685	0.798211	0.0183205	0.0299033	7.84492e-06	0.723625
D-dichotoma_M_contig2196.7295.1	OG0009874	6.03195	5.99745	6.10125	6.10614	8.19771	6.5747	8.1471	7.4633	7.42781	8.53835	8.92678	8.08846	6.68479	6.70291	7.30937	7.4607	7.50036	6.8083	7.21954	7.26302	7.00095	6.76543	7.20151	6.96598	6.58902	7.50822	7.09037	grey	0.0519409	0.186277	0.0285381	0.257689	0.281006	0.192417	0.161692	-0.32975	-0.076292	0.779861	0.796951	0.352216	0.887633	0.194399	0.155649	0.33628	0.420392	0.0930138	0.705268	1.62295e-06
D-dichotoma_M_contig2197.7300.1	OG0000337	11.1836	10.8458	11.0779	5.69807	7.39403	6.5747	10.2046	12.6916	11.7912	11.0736	11.012	11.7873	12.8252	10.4559	11.2688	10.4497	10.4672	12.0215	10.5004	10.953	11.7953	11.4971	11.6386	10.9787	11.2368	10.5632	11.6329	turquoise	-0.748468	0.772384	0.885391	0.220939	0.323718	-0.57547	-0.0876718	0.361958	0.363125	0.0934763	7.13208e-06	2.35767e-06	8.50992e-10	0.268094	0.0995182	0.00168625	0.66368	0.063558	0.0626461	0.642826
D-dichotoma_M_contig2198.7302.1	OG0009875	0	0	0	0	4.45286	3.38293	0	0	0	0	0	0	0.562846	0.336329	0	0.242014	0	0	0.483315	0.533566	0.488969	0	1.2534	4.54368	3.11883	2.22162	1.36514	NA	NA	NA	NA	NA	NA	NA	NA	NA	NA	NA	NA	NA	NA	NA	NA	NA	NA	NA	NA	NA
D-dichotoma_M_contig2199.7303.1	OG0009876	0	0	2.38634	2.73491	0	0	0	0	0	0	0	0	1.13287	1.36471	0.617565	0.935998	0	1.42381	0.996303	1.22805	0	0.804027	1.84601	1.88979	2.43983	2.08171	0.609128	NA	NA	NA	NA	NA	NA	NA	NA	NA	NA	NA	NA	NA	NA	NA	NA	NA	NA	NA	NA	NA
D-dichotoma_M_contig2200.7340.1	OG0009877	3.17858	2.64168	2.38634	6.32554	0	6.71082	5.55632	2.5544	4.04982	5.18244	5.68902	4.0834	5.10445	6.66981	5.34749	5.29176	6.42562	5.53727	5.31471	4.74046	5.89479	5.96676	7.14267	6.23236	6.06939	5.74973	5.94049	red	-0.288757	-0.185764	0.259373	-0.466415	-0.154426	0.430639	0.485293	0.74494	0.58969	0.31156	0.144083	0.353566	0.191396	0.0141928	0.441843	0.0249375	0.0102914	8.31144e-06	0.0012076	0.113655
D-dichotoma_M_contig332.11402.1	OG0009878	5.27	0	4.16295	4.56247	0	0	5.24204	4.91865	5.72449	4.47172	4.40844	5.04021	5.74762	5.88317	5.62245	4.88226	3.94703	4.48008	5.63082	4.99448	4.19755	4.32353	5.75326	5.77256	4.8322	5.07733	5.33629	turquoise	-0.510239	0.403911	0.647761	-0.0433302	-0.00810676	-0.109394	0.219102	0.56489	0.492749	0.215281	0.00654495	0.0366679	0.00025929	0.830082	0.967988	0.587016	0.272193	0.0021411	0.00902017	0.280852
D-dichotoma_M_contig332.11403.1	OG0009879	5.05383	4.76569	4.16295	6.83471	6.98185	6.06659	4.03141	4.35734	5.40936	5.43883	4.40844	4.0834	3.6926	4.17513	4.50637	4.52981	4.44183	4.3272	4.61348	3.7581	3.36165	3.60757	5.01407	4.12601	4.24306	4.27209	4.66836	turquoise	0.802975	-0.563936	-0.847837	0.0278734	-0.254833	0.360064	0.0729278	-0.554963	-0.531113	-0.0523915	4.64345e-07	0.0021869	2.37897e-08	0.890235	0.199564	0.0650598	0.71773	0.0026601	0.00436465	0.795226
D-dichotoma_M_contig332.11407.1	OG0009880	0	0	0	0	0	0	0	0	0	0	0	0	0	0	0	0	0	0	0	0	0	0	0	0	0	0	0	NA	NA	NA	NA	NA	NA	NA	NA	NA	NA	NA	NA	NA	NA	NA	NA	NA	NA	NA	NA	NA
D-dichotoma_M_contig332.11408.1	OG0009881	0	0	0	0	0	0	0	0	0	0	0	0	0	0	0	0	0	0	0	0	0	0	0	0	0	0	0.609128	NA	NA	NA	NA	NA	NA	NA	NA	NA	NA	NA	NA	NA	NA	NA	NA	NA	NA	NA	NA	NA
D-dichotoma_M_contig537.15944.1	OG0009882	0	2.64168	0	0	0	0	0	0	0	2.17994	0	4.0834	0	2.05328	1.87634	0.242014	0	0.880852	1.13347	1.08322	0	0	0	0.537017	0.302097	0	0	NA	NA	NA	NA	NA	NA	NA	NA	NA	NA	NA	NA	NA	NA	NA	NA	NA	NA	NA	NA	NA
D-dichotoma_M_contig537.15948.1	OG0000681	3.85035	2.64168	4.46868	0	0	3.38293	4.03141	5.32171	4.04982	3.9189	5.37406	3.16609	3.49306	3.87303	4.2058	4.25411	3.1518	4.91508	4.3004	4.56065	4.19755	4.18247	3.92469	4.21629	4.8322	4.2559	2.58273	NA	NA	NA	NA	NA	NA	NA	NA	NA	NA	NA	NA	NA	NA	NA	NA	NA	NA	NA	NA	NA
D-dichotoma_M_contig538.15958.1	OG0009883	0	0	0	6.22001	4.45286	5.27529	0	0	0	2.17994	0	0	0	0	0	0	0	0.642448	0.844711	0	0	0	0	3.35683	1.11415	2.15336	4.42547	green	0.755862	-0.768318	-0.763029	-0.326383	-0.31853	0.587361	0.309565	-0.287171	-0.185378	-0.01328	5.133e-06	2.87197e-06	3.69066e-06	0.0966037	0.10538	0.00127679	0.11611	0.146399	0.354584	0.947583
D-dichotoma_M_contig540.16016.1	OG0009884	0	0	0	0	0	0	2.02518	0	0	0	0	0	0.308699	0	0	0	0	0	0	0	0	0	0	0	0	0	0	NA	NA	NA	NA	NA	NA	NA	NA	NA	NA	NA	NA	NA	NA	NA	NA	NA	NA	NA	NA	NA
D-dichotoma_M_contig1578.4012.1	OG0000682	5.90842	5.73892	5.6932	11.036	11.2189	10.6731	6.22285	6.21167	5.72449	6.78754	7.66789	7.58816	9.01953	7.50692	8.32979	9.41263	9.40175	8.48632	8.72121	9.57233	8.50016	8.40482	8.91325	8.23959	8.22812	9.01763	8.93922	blue	0.194202	-0.909189	-0.503391	-0.803511	-0.550858	0.920369	0.426448	-0.162299	0.342736	0.0782916	0.331729	5.29678e-11	0.00743536	4.50193e-07	0.00290423	1.09054e-11	0.0265426	0.418624	0.0801028	0.697896
D-dichotoma_M_contig1582.4038.1	OG0009885	6.34946	3.52119	4.72082	4.87213	5.41954	4.87262	6.54091	3.42606	4.44292	6.29811	3.47482	5.35334	2.33801	4.47675	4.64632	4.13918	4.33312	3.64386	4.46542	3.65936	3.36165	2.80069	4.06551	4.66405	3.90459	4.20623	5.25923	grey	0.530185	0.0369854	-0.306758	0.369512	0.103315	-0.0182495	0.0379962	-0.290125	-0.397383	0.139928	0.0044464	0.85468	0.119629	0.0578347	0.608082	0.928011	0.850752	0.142108	0.0401161	0.486353
D-dichotoma_M_contig1583.4044.1	OG0000683	6.34946	6.79509	6.55494	6.22001	6.7211	6.06659	7.58019	6.69152	8.05288	8.4391	8.80152	8.72701	7.26843	7.8168	7.84791	7.98222	6.99609	7.32478	7.52869	8.00295	7.58972	7.17963	7.86524	7.65594	7.57447	7.28116	7.50971	blue	-0.421389	0.442496	0.51514	0.15315	0.213446	0.0801696	0.271683	0.163134	0.30277	0.796126	0.0285907	0.0208189	0.00596441	0.44567	0.285072	0.690997	0.170421	0.416202	0.124764	6.83912e-07
D-dichotoma_M_contig1583.4046.1	OG0009886	3.17858	5.23588	4.46868	0	0	0	5.24204	3.96558	4.04982	4.68479	3.47482	5.35334	0.966698	0.336329	0.776001	1.9029	0.745095	0.880852	2.91957	2.90473	2.44304	1.08335	2.21197	2.57547	0.76452	1.05499	2.22569	NA	NA	NA	NA	NA	NA	NA	NA	NA	NA	NA	NA	NA	NA	NA	NA	NA	NA	NA	NA	NA
D-dichotoma_M_contig1583.4047.1	OG0009887	2.67116	0	3.24132	0	0	0	4.83965	2.5544	0	3.01127	4.40844	3.16609	0	0	0	0	0	0	0.261803	0.533566	0	0	0.75874	0.537017	0.302097	0.281597	0	NA	NA	NA	NA	NA	NA	NA	NA	NA	NA	NA	NA	NA	NA	NA	NA	NA	NA	NA	NA	NA
D-dichotoma_M_contig1452.3319.1	OG0009888	0	0	3.24132	0	0	4.31207	0	3.42606	2.62933	3.01127	3.47482	0	4.9006	2.86809	5.2697	3.87757	3.76768	2.59664	5.66517	5.1297	5.03878	4.3763	5.57625	4.12601	3.71288	3.92843	4.56007	yellow	-0.509344	-0.0741338	0.434939	-0.536791	-0.220414	0.227052	0.274634	0.501837	0.679256	0.0608836	0.00665593	0.713254	0.0233734	0.00389183	0.26926	0.254735	0.165643	0.00765111	9.78028e-05	0.762903
D-dichotoma_M_contig1454.3322.1	OG0009889	5.16596	5.23588	5.43573	2.73491	4.45286	4.87262	5.11997	6.21167	5.85951	8.2174	8.29764	8.32213	5.72176	5.17714	5.72802	4.88226	5.0045	4.84641	5.47173	5.43593	4.58473	5.39329	6.27874	5.39363	5.80063	5.70274	5.54548	blue	-0.166455	0.593478	0.381671	0.519105	0.364026	-0.212692	0.14716	0.0486777	-0.10281	0.737662	0.406647	0.00110196	0.0494759	0.00552719	0.0619492	0.286815	0.463873	0.809469	0.609845	1.13104e-05
D-dichotoma_M_contig1457.3345.1	OG0009890	7.18957	6.40683	7.04524	7.50803	0	8.14953	6.28097	7.2019	6.97152	6.01267	6.81119	6.47146	6.97205	6.98592	7.8568	7.71762	7.77726	7.95809	7.31277	7.24185	8.01118	7.64242	7.56266	7.20741	7.57094	7.40925	7.49508	red	-0.410662	0.199988	0.490724	-0.146694	0.0851955	-0.137837	0.0453787	0.968394	0.382001	-0.0629219	0.033356	0.31724	0.0093517	0.465305	0.672652	0.492956	0.822172	1.36487e-16	0.0492628	0.7552
D-dichotoma_M_contig4703.14689.1	OG0009891	2.67116	4.06365	0	0	0	0	3.35209	0	0	2.17994	0	0	0.308699	0.838041	0.439558	0	0.293208	0	0.483315	0.29131	0	0	0	0.293353	0	0	0	NA	NA	NA	NA	NA	NA	NA	NA	NA	NA	NA	NA	NA	NA	NA	NA	NA	NA	NA	NA	NA
D-dichotoma_M_contig4703.14691.1	OG0009892	0	0	0	6.10614	0	5.27529	4.27966	0	0	5.31632	3.47482	3.16609	1.75954	3.27259	3.28194	2.56836	3.66889	2.7246	3.42624	3.63358	2.97425	2.80069	3.24445	3.47856	2.86577	2.40893	3.06259	grey	0.111383	-0.39235	-0.163262	-0.331029	-0.243247	0.652984	0.39181	0.394907	0.262569	0.508424	0.580192	0.0429461	0.415831	0.0916775	0.221478	0.000222267	0.0432593	0.0414894	0.185787	0.00677169
D-dichotoma_M_contig4706.14693.1	OG0009893	0	0	0	0	0	0	0	0	0	0	0	0	0.308699	0	0.439558	0	0	0	0	0.922202	0	0	1.14471	0.537017	0.551757	0	0.336476	NA	NA	NA	NA	NA	NA	NA	NA	NA	NA	NA	NA	NA	NA	NA	NA	NA	NA	NA	NA	NA
D-dichotoma_M_contig4708.14697.1	OG0009894	5.16596	2.64168	3.24132	4.16764	0	0	6.71966	4.91865	6.2021	6.01267	7.05022	6.01812	5.54135	5.40876	6.11662	5.67883	5.34567	4.15617	6.29281	5.84261	5.09095	4.56998	5.9518	5.64834	4.9013	5.0017	5.26909	turquoise	-0.538469	0.606384	0.72474	0.182306	0.238723	-0.196966	0.139035	0.547945	0.380548	0.457283	0.00376072	0.00079979	1.90861e-05	0.362756	0.230459	0.324758	0.489167	0.00308892	0.0502056	0.0164791
D-dichotoma_M_contig4710.14711.1	OG0009895	0	0	0	0	0	0	0	0	0	2.17994	0	0	0	0	0	0.630339	0	0	0	0	0	0	0	0	0	0.281597	0.609128	NA	NA	NA	NA	NA	NA	NA	NA	NA	NA	NA	NA	NA	NA	NA	NA	NA	NA	NA	NA	NA
D-dichotoma_M_contig4714.14712.1	OG0009896	1.88155	0	0	0	0	0	2.8361	0	0	2.17994	3.47482	0	0	1.95901	0.776001	0	0	1.42381	0.844711	0.29131	0.853502	1.69506	0.75874	0.745413	1.92418	0.719506	0	NA	NA	NA	NA	NA	NA	NA	NA	NA	NA	NA	NA	NA	NA	NA	NA	NA	NA	NA	NA	NA
D-dichotoma_M_contig4714.14713.1	OG0000017	1.88155	0	2.38634	2.73491	6.7211	4.31207	2.02518	0	0	3.01127	3.47482	0	2.03621	2.86809	2.29809	2.47666	1.79866	1.69773	3.06387	2.39267	3.62016	3.14285	2.85362	4.18085	2.99784	2.98135	4.69786	blue	0.269914	-0.643089	-0.409865	-0.537617	-0.346559	0.628795	0.365107	-0.389309	0.217262	0.0977122	0.173331	0.000296886	0.0337338	0.00382682	0.0765757	0.000443237	0.0611211	0.0447316	0.27634	0.627772
D-dichotoma_M_contig4725.14739.1	OG0009897	1.88155	2.64168	2.38634	2.73491	0	0	0	0	0	2.17994	4.40844	4.63971	2.64362	3.70894	3.40832	3.17573	3.96795	3.09983	3.02913	3.87271	1.77427	1.69506	3.71262	2.46197	1.8328	3.68422	3.42206	NA	NA	NA	NA	NA	NA	NA	NA	NA	NA	NA	NA	NA	NA	NA	NA	NA	NA	NA	NA	NA
D-dichotoma_M_contig4729.14744.1	OG0009898	0	0	0	0	0	0	0	0	0	3.01127	0	0	0.562846	1.03574	0.236455	0	0	0	0	0	0	0	0.603131	0.745413	0	0.517103	0	NA	NA	NA	NA	NA	NA	NA	NA	NA	NA	NA	NA	NA	NA	NA	NA	NA	NA	NA	NA	NA
D-dichotoma_M_contig4740.14778.1	OG0009899	0	0	0	5.34342	0	0	0	0	0	4.68479	0	0	3.6926	3.192	2.53818	0.935998	2.57482	2.59664	2.47935	2.12309	2.21131	2.72132	3.71262	3.1525	4.15148	3.20014	3.3119	NA	NA	NA	NA	NA	NA	NA	NA	NA	NA	NA	NA	NA	NA	NA	NA	NA	NA	NA	NA	NA
D-dichotoma_M_contig678.17675.1	OG0009900	6.48535	5.42373	5.28743	0	0	0	8.64442	6.99696	8.3103	7.44325	7.43467	6.01812	0.562846	2.7034	0.617565	1.67433	0.293208	0.642448	3.82094	3.58061	0	0	0.230207	0	0.76452	0	0.336476	brown	0.142064	0.74675	0.161093	0.932374	0.516512	-0.666711	-0.497455	-0.0732145	-0.616212	0.219943	0.479656	7.68638e-06	0.422139	1.51083e-12	0.00580995	0.000146188	0.00828767	0.716665	0.000620776	0.270311
D-dichotoma_M_contig678.17679.1	OG0009901	0	0	0	0	0	0	2.02518	0	0	0	0	0	0	0.608885	0	0	0	0	0	0	0	0	0	0	0	0	0	NA	NA	NA	NA	NA	NA	NA	NA	NA	NA	NA	NA	NA	NA	NA	NA	NA	NA	NA	NA	NA
D-dichotoma_M_contig680.17697.1	OG0009902	8.85415	9.16043	8.51031	5.98251	7.56301	6.71082	8.2813	8.26715	7.96576	9.15368	9.14875	9.26482	8.33156	8.99528	8.38309	8.63421	8.62793	9.6962	8.43224	8.38152	9.84808	9.74879	8.44026	8.65397	9.38095	8.72019	9.39988	turquoise	-0.714087	0.601159	0.770749	0.0863451	0.406494	-0.377556	-0.0378557	0.22585	0.422542	0.221659	2.8764e-05	0.000912092	2.5536e-06	0.668481	0.0353711	0.0521912	0.851298	0.257326	0.0281129	0.266496
D-dichotoma_M_contig681.17700.1	OG0000338	4.30692	5.42373	3.77451	0	0	3.38293	5.55632	5.8946	6.30033	7.5285	8.3433	7.9557	7.49903	5.82422	6.62345	6.97854	6.85997	6.45402	5.27819	6.34566	7.91076	7.05163	6.35694	5.65481	4.9125	6.25216	7.38376	turquoise	-0.681149	0.611509	0.803014	0.113062	0.451532	-0.248371	0.106632	0.5335	0.43707	0.473325	9.18947e-05	0.000701525	4.63298e-07	0.574462	0.0180687	0.211595	0.596547	0.00416023	0.0226285	0.012643
D-dichotoma_M_contig819.19007.1	OG0009903	1.88155	0	2.38634	5.53161	4.45286	5.27529	2.02518	0	0	2.17994	3.47482	4.63971	2.69768	1.74969	2.00992	1.75461	1.48692	2.89748	4.84085	4.46157	1.59321	1.31727	4.24734	2.13168	1.8328	2.34915	3.42206	blue	0.428475	-0.618588	-0.527859	-0.32784	-0.50674	0.718352	0.204171	-0.147583	-0.0204763	0.296259	0.0257563	0.000583157	0.004657	0.0950382	0.00698799	2.44617e-05	0.307011	0.462575	0.919254	0.133489
D-dichotoma_M_contig819.19008.1	OG0009904	5.16596	5.87397	5.43573	7.59503	7.56301	8.4895	5.64751	6.47145	7.33815	6.91965	7.73794	7.85989	5.92804	4.21647	4.80179	5.03474	4.3169	5.87036	7.88623	7.49186	6.00765	5.76386	6.41367	4.61179	4.69622	5.52506	6.5176	turquoise	0.594041	-0.273287	-0.562951	0.204711	-0.0311467	0.254261	-0.293775	-0.30581	-0.50658	0.315764	0.00108696	0.167811	0.002235	0.305706	0.877435	0.200608	0.136933	0.120835	0.00700884	0.108608
D-dichotoma_M_contig820.19033.1	OG0009905	0	0	0	0	0	0	0	0	0	0	0	0	1.65412	2.76041	2.29809	2.92127	1.88922	0	0	0	1.14426	1.69506	1.2534	2.77876	2.31031	1.65782	2.37926	NA	NA	NA	NA	NA	NA	NA	NA	NA	NA	NA	NA	NA	NA	NA	NA	NA	NA	NA	NA	NA
D-dichotoma_M_contig1990.6210.1	OG0009906	0	0	0	0	0	0	0	2.5544	2.62933	0	0	0	0	0	0	0	0	0	0	0	0	0	0	0	0	0	0	NA	NA	NA	NA	NA	NA	NA	NA	NA	NA	NA	NA	NA	NA	NA	NA	NA	NA	NA	NA	NA
D-dichotoma_M_contig1992.6214.1	OG0000684	4.30692	5.01986	5.43573	0	0	0	5.24204	5.13421	6.71078	5.84553	6.16643	5.61048	5.70206	5.62373	5.54752	6.29353	5.96633	5.21657	6.20215	6.14589	5.83487	5.90524	6.34471	5.9723	5.90527	6.75653	6.59412	turquoise	-0.769241	0.736984	0.957981	0.108267	0.390643	-0.412492	0.0927948	0.525434	0.53117	0.233934	2.74708e-06	1.1634e-05	4.53424e-15	0.590899	0.0439414	0.0325009	0.645261	0.0048855	0.00435968	0.240226
D-dichotoma_M_contig1993.6215.1	OG0009907	4.79946	0	3.77451	5.53161	4.45286	5.27529	4.03141	0	2.62933	4.68479	3.47482	4.63971	2.80007	1.95901	3.50201	3.68614	3.94703	3.61111	3.64854	3.73404	3.18092	2.72132	3.94104	3.47856	3.60655	3.80037	3.52441	grey	0.367126	-0.463852	-0.423943	-0.203497	-0.25626	0.564644	0.247543	-0.0971299	-0.0340404	0.282354	0.0595977	0.0148063	0.0275411	0.308644	0.196971	0.00215284	0.213172	0.629833	0.866144	0.153592
D-dichotoma_M_contig1997.6237.1	OG0009908	7.0504	7.10071	7.13478	9.79633	9.19525	9.4096	6.44248	7.24889	6.6375	5.03484	4.97057	6.33559	6.77556	6.21429	7.15026	6.93398	7.32288	7.01952	6.59259	6.92337	6.55138	7.01465	6.70436	6.77126	6.52112	7.07521	6.90043	blue	0.589772	-0.795091	-0.787983	-0.37973	-0.415196	0.383652	-0.0549143	-0.330343	-0.259823	-0.549495	0.00120521	7.24216e-07	1.06398e-06	0.0507422	0.0312693	0.0482093	0.785587	0.0923923	0.190599	0.00298943
D-dichotoma_M_contig1997.6238.1	OG0009909	0	0	0	2.73491	0	0	3.35209	0	0	0	0	0	2.52902	3.76574	3.28194	2.95564	2.72989	3.3184	3.69361	3.43897	2.73296	2.63733	3.57279	3.25828	3.11883	3.05803	2.22569	NA	NA	NA	NA	NA	NA	NA	NA	NA	NA	NA	NA	NA	NA	NA	NA	NA	NA	NA	NA	NA
D-dichotoma_M_contig2649.9111.1	OG0009910	0	0	0	0	0	0	0	0	0	0	0	0	0	1.03574	0	0.449203	0	0.356693	0.6753	0	0	0.457315	0.899188	2.05547	0	0	0	NA	NA	NA	NA	NA	NA	NA	NA	NA	NA	NA	NA	NA	NA	NA	NA	NA	NA	NA	NA	NA
D-dichotoma_M_contig2649.9112.1	OG0009911	0	0	0	0	0	0	3.35209	0	0	3.01127	0	0	5.47325	5.69857	5.72316	4.22623	3.25758	4.69841	5.6595	5.90858	3.66673	3.25982	4.83327	5.71179	4.94559	4.54943	4.21714	yellow	-0.664654	-0.0472482	0.570743	-0.649857	-0.422773	0.330204	0.429818	0.459105	0.931356	0.0641392	0.000155867	0.814968	0.00187795	0.000243829	0.0280181	0.0925382	0.0252454	0.0160001	1.81103e-12	0.750611
D-dichotoma_M_contig2653.9143.1	OG0009912	0	0	0	0	0	0	0	0	0	0	0	0	0.562846	3.192	1.72911	1.75461	1.23399	0.356693	0.261803	0.922202	0.488969	0.804027	2.09999	1.48742	1.6306	0.896975	2.05381	NA	NA	NA	NA	NA	NA	NA	NA	NA	NA	NA	NA	NA	NA	NA	NA	NA	NA	NA	NA	NA
D-dichotoma_M_contig2653.9144.1	OG0009913	0	0	2.38634	0	0	0	0	0	0	0	0	0	0.308699	0	0	1.97169	0	0	0	0	0.853502	1.85235	0	0	0.302097	1.05499	0.609128	NA	NA	NA	NA	NA	NA	NA	NA	NA	NA	NA	NA	NA	NA	NA	NA	NA	NA	NA	NA	NA
D-dichotoma_M_contig2659.9155.1	OG0009914	0	0	0	0	0	0	0	0	0	0	0	0	0.562846	1.20958	1.16778	1.18808	1.79866	1.2645	0	0	0.488969	1.31727	0.899188	0.537017	0.551757	0.896975	0.609128	NA	NA	NA	NA	NA	NA	NA	NA	NA	NA	NA	NA	NA	NA	NA	NA	NA	NA	NA	NA	NA
D-dichotoma_M_contig4199.13622.1	OG0009915	0	0	0	0	0	0	0	0	0	0	0	0	0.778857	1.03574	0.439558	0	0	0	0.483315	0.533566	0	0	0.899188	0.537017	0.551757	0.281597	0	NA	NA	NA	NA	NA	NA	NA	NA	NA	NA	NA	NA	NA	NA	NA	NA	NA	NA	NA	NA	NA
D-dichotoma_M_contig4201.13667.1	OG0009916	0	0	0	0	0	0	2.02518	0	0	2.17994	0	0	4.45917	3.87303	3.40832	3.36664	3.25758	2.59664	4.41248	4.18815	0.488969	2.80069	3.98898	3.69496	4.17027	4.06474	2.45032	NA	NA	NA	NA	NA	NA	NA	NA	NA	NA	NA	NA	NA	NA	NA	NA	NA	NA	NA	NA	NA
D-dichotoma_M_contig4204.13672.1	OG0009917	0	0	0	0	0	0	0	0	0	0	0	0	0	0	0	0	0	0	0	0	0	0	0	0	0	0	0	NA	NA	NA	NA	NA	NA	NA	NA	NA	NA	NA	NA	NA	NA	NA	NA	NA	NA	NA	NA	NA
D-dichotoma_M_contig4213.13689.1	OG0009918	2.67116	3.52119	2.38634	4.16764	0	0	2.8361	2.5544	4.04982	3.01127	0	0	1.54039	0.336329	1.27784	1.18808	0	0	1.58003	1.48027	0.488969	1.85235	1.97858	2.05547	2.66846	2.40893	0.838351	NA	NA	NA	NA	NA	NA	NA	NA	NA	NA	NA	NA	NA	NA	NA	NA	NA	NA	NA	NA	NA
D-dichotoma_M_contig4218.13695.1	OG0009919	3.17858	0	2.38634	0	0	0	2.8361	3.42606	3.50777	4.68479	3.47482	0	4.32821	4.75443	5.13726	3.82276	4.14378	4.7743	4.46542	4.79961	3.18092	3.77415	4.18009	4.8219	4.79636	4.49531	2.51804	NA	NA	NA	NA	NA	NA	NA	NA	NA	NA	NA	NA	NA	NA	NA	NA	NA	NA	NA	NA	NA
D-dichotoma_M_contig261.9008.1	OG0000685	2.67116	0	2.38634	5.12693	0	4.31207	0	0	0	4.47172	3.47482	0	10.7966	7.95754	10.8322	9.64988	9.40031	9.2677	10.9153	11.5534	7.56535	9.33181	9.95967	10.0855	9.19966	9.92833	9.56857	yellow	-0.586489	-0.271026	0.424204	-0.812305	-0.450298	0.47826	0.468452	0.540054	0.927516	0.0143097	0.00130359	0.171498	0.0274358	2.67302e-07	0.0184254	0.0116243	0.0137204	0.00364037	3.50153e-12	0.943525
D-dichotoma_M_contig262.9036.1	OG0009920	4.49042	3.52119	3.77451	3.62227	4.45286	0	4.98661	0	4.44292	5.03484	4.97057	4.63971	6.2554	6.06953	6.11291	5.94145	6.18766	5.58862	5.78454	5.71322	5.31217	5.46813	6.05301	5.66126	5.68781	5.83391	5.73528	turquoise	-0.636721	0.130531	0.562629	-0.391248	-0.0994429	0.225211	0.390198	0.187054	0.732014	0.256876	0.000355794	0.516371	0.00225095	0.0435869	0.621662	0.258711	0.044204	0.350174	1.42682e-05	0.195858
D-dichotoma_M_contig263.9056.1	OG0009921	5.77332	5.58992	5.43573	0	0	0	4.83965	6.62183	6.2021	3.53532	3.47482	5.61048	0	0.336329	0.439558	0.242014	0	0.356693	1.25872	0.740931	0	1.31727	2.15706	0.745413	1.6306	0.281597	0.838351	brown	0.161273	0.752801	0.156636	0.935779	0.546532	-0.827689	-0.495605	-0.0862462	-0.668751	-0.0209484	0.421613	5.89002e-06	0.435257	8.0698e-13	0.00318208	1.00307e-07	0.00856939	0.66884	0.000137112	0.917398
D-dichotoma_M_contig2716.9386.1	OG0009922	1.88155	0	0	0	0	0	2.02518	0	0	4.68479	4.40844	5.04021	4.1651	4.45964	2.7818	2.65458	2.99751	5.04333	4.17887	3.93735	6.54517	6.11387	3.21787	3.79209	4.03331	3.20014	5.32688	turquoise	-0.641866	0.154439	0.578299	-0.330419	0.0498078	0.21218	0.243777	0.381872	0.687423	0.490076	0.00030748	0.441804	0.00157978	0.0923126	0.805129	0.288007	0.220441	0.0493459	7.45023e-05	0.00945987
D-dichotoma_M_contig2716.9385.1	OG0000014	0	0	0	0	0	0	5.89089	0	2.62933	4.87041	0	0	2.58746	3.70894	2.00992	1.4026	1.08869	2.95079	4.06343	4.33932	5.28257	1.08335	3.50845	3.18863	3.15701	1.75315	2.45032	yellow	-0.422451	0.174025	0.44559	-0.195745	-0.130927	0.0664717	0.0637419	0.306327	0.518319	0.175027	0.0281506	0.385327	0.0198411	0.327827	0.515087	0.74184	0.752108	0.120177	0.00561165	0.382555
D-dichotoma_M_contig2717.9387.1	OG0009923	6.60954	0	0	6.76137	0	0	7.08851	0	0	7.25596	0	0	0	0	0	0	0	0	1.76031	1.48027	0	0	0	0.293353	0	0	0	grey	0.367118	0.0810052	-0.221034	0.367026	0.0409569	-0.0885032	-0.199123	-0.00436326	-0.349444	0.0704102	0.059603	0.687935	0.267883	0.0596725	0.839266	0.660677	0.31938	0.982768	0.0739937	0.727102
D-dichotoma_M_contig2717.9390.1	OG0009924	0	0	0	5.34342	5.99322	5.84779	0	2.5544	0	2.17994	0	0	0	0	0	0	0	0	0	0.533566	0	0	0	0	0	0	0	turquoise	0.797307	-0.727611	-0.946717	-0.0998316	-0.331696	0.462912	-0.0155406	-0.544418	-0.509786	-0.0813653	6.4043e-07	1.70346e-05	8.30325e-14	0.620293	0.090986	0.0150366	0.938675	0.00332586	0.00660091	0.686616
D-dichotoma_M_contig2722.9403.1	OG0009925	0	0	0	0	0	0	0	0	0	0	0	0	0	0.608885	0.236455	1.29933	1.70204	0.880852	1.37396	1.08322	0.853502	0.804027	0.603131	1.36647	1.6306	1.19739	0.838351	NA	NA	NA	NA	NA	NA	NA	NA	NA	NA	NA	NA	NA	NA	NA	NA	NA	NA	NA	NA	NA
D-dichotoma_M_contig2722.9404.1	OG0009926	0	0	0	0	0	0	0	0	0	0	0	0	0.966698	2.51746	0.439558	1.97169	4.06827	2.21609	1.37396	2.32985	0.488969	0	2.15706	1.70259	2.16801	0.719506	1.0361	NA	NA	NA	NA	NA	NA	NA	NA	NA	NA	NA	NA	NA	NA	NA	NA	NA	NA	NA	NA	NA
D-dichotoma_M_contig2724.9417.1	OG0009927	4.6532	0	0	2.73491	5.99322	3.38293	3.35209	0	0	5.31632	3.47482	3.16609	1.13287	3.10663	2.53818	2.27366	2.33814	2.95079	3.02913	2.39267	2.21131	2.54814	3.37047	2.33877	2.09122	2.67547	2.05381	grey	0.255932	-0.341401	-0.355798	-0.130361	-0.256494	0.524375	0.224677	-0.41183	-0.004024	0.432806	0.197565	0.0813631	0.0685417	0.516922	0.196548	0.00498828	0.259872	0.032808	0.984107	0.0241391
D-dichotoma_M_contig2725.9419.1	OG0009928	0	0	0	5.12693	5.41954	3.38293	2.8361	2.5544	0	0	0	0	0	0	0	0	0	0	0.483315	0	0	0	0	0	0.302097	1.55574	3.79397	NA	NA	NA	NA	NA	NA	NA	NA	NA	NA	NA	NA	NA	NA	NA	NA	NA	NA	NA	NA	NA
D-dichotoma_M_contig161.4268.1	OG0000686	6.99074	7.20688	7.78707	13.7048	13.5704	13.8376	8.05016	7.50261	7.66753	9.1447	9.19929	9.10683	9.26699	8.72149	9.06224	9.1186	8.93142	9.01429	8.79351	9.22393	9.19969	9.25726	8.66657	8.98131	8.84073	9.00194	9.34849	blue	0.618186	-0.928411	-0.865715	-0.457809	-0.452266	0.807021	0.239415	-0.395675	-0.156913	0.0893418	0.000589389	3.01243e-12	5.5201e-09	0.0163395	0.0178589	3.66792e-07	0.22907	0.0410592	0.434435	0.657654
D-dichotoma_M_contig162.4330.1	OG0000157	7.7534	8.12283	7.84127	4.16764	5.41954	6.5747	8.25253	8.19699	9.29617	9.346	9.66256	9.53678	8.59099	7.61906	7.84008	8.15209	7.4695	7.80003	8.16855	8.31314	7.68614	6.50604	8.57201	7.6831	6.89035	7.5717	7.36319	blue	-0.410883	0.793053	0.644359	0.526779	0.413501	-0.444322	-0.0784608	0.269334	0.0191857	0.479654	0.0332518	8.09903e-07	0.000286217	0.0047576	0.0320367	0.0202371	0.697274	0.174293	0.924328	0.0113493
D-dichotoma_M_contig162.4332.1	OG0009929	0	0	0	6.83471	0	7.33398	0	0	2.62933	0	0	0	1.13287	0	0	0	0	0	0	0	0.488969	0	0.75874	0	0	0	0	turquoise	0.643105	-0.637352	-0.726362	-0.146247	-0.264859	0.390488	0.00913592	0.0786089	-0.367241	-0.135342	0.00029675	0.000349533	1.79019e-05	0.46668	0.181839	0.0440325	0.963927	0.696729	0.0595112	0.500892
D-dichotoma_M_contig163.4393.1	OG0009930	0	0	0	0	0	0	2.02518	0	0	3.9189	0	0	3.66573	3.58817	4.32597	2.61212	2.40105	3.50818	3.84111	3.0676	3.11526	1.69506	4.10955	3.03835	2.66846	2.34915	1.95953	NA	NA	NA	NA	NA	NA	NA	NA	NA	NA	NA	NA	NA	NA	NA	NA	NA	NA	NA	NA	NA
D-dichotoma_M_contig163.4394.1	OG0000687	9.93404	10.6806	9.91447	4.56247	0	3.38293	9.9328	9.72982	10.0488	11.136	11.2761	11.1762	8.00299	8.84029	8.55074	8.44454	8.552	7.48921	8.72935	8.22849	8.48887	7.85024	8.52604	8.05253	7.93457	7.86369	7.40851	blue	-0.471096	0.928253	0.753847	0.618012	0.56201	-0.668765	-0.172992	0.518462	-0.00450492	0.294718	0.0131268	3.0938e-12	5.62077e-06	0.000592086	0.00228183	0.000137052	0.388198	0.00559616	0.982208	0.135618
D-dichotoma_M_contig163.4404.1	OG0009931	0	0	0	0	0	0	0	0	0	0	0	0	0	0	0	0	0	0	0	0.29131	0.488969	0	0	0.537017	0.302097	0	0.336476	NA	NA	NA	NA	NA	NA	NA	NA	NA	NA	NA	NA	NA	NA	NA	NA	NA	NA	NA	NA	NA
D-dichotoma_M_contig1764.5092.1	OG0009932	0	0	0	0	4.45286	0	0	0	0	0	0	0	0.308699	0	0	0.242014	0	0	0	0	0.853502	0	0	0	0	0	0	NA	NA	NA	NA	NA	NA	NA	NA	NA	NA	NA	NA	NA	NA	NA	NA	NA	NA	NA	NA	NA
D-dichotoma_M_contig1765.5096.1	OG0009933	1.88155	3.52119	0	2.73491	0	0	0	0	0	4.68479	0	5.35334	2.98534	2.91906	3.28194	3.0541	0	4.55084	4.35753	3.82795	3.7556	3.25982	3.1908	3.76841	3.55029	2.40893	2.58273	NA	NA	NA	NA	NA	NA	NA	NA	NA	NA	NA	NA	NA	NA	NA	NA	NA	NA	NA	NA	NA
D-dichotoma_M_contig1766.5101.1	OG0009934	1.88155	0	2.38634	0	0	0	0	0	0	2.17994	3.47482	0	0	0.838041	0.439558	0.242014	0	0.356693	0.844711	0	0	0	1.77486	0	0.302097	0	0.609128	NA	NA	NA	NA	NA	NA	NA	NA	NA	NA	NA	NA	NA	NA	NA	NA	NA	NA	NA	NA	NA
D-dichotoma_M_contig1767.5102.1	OG0009935	0	0	0	0	0	0	0	0	0	0	0	3.16609	2.26827	3.27259	2.44688	3.2046	3.35612	1.92785	1.25872	1.22805	1.93512	1.51849	2.98552	4.54368	4.4723	3.5579	3.45699	NA	NA	NA	NA	NA	NA	NA	NA	NA	NA	NA	NA	NA	NA	NA	NA	NA	NA	NA	NA	NA
D-dichotoma_M_contig129.2207.1	OG0009936	0	0	0	0	0	0	2.8361	0	0	0	0	0	0	2.05328	1.04863	0.791248	0	0.642448	1.25872	0.533566	0.488969	0	0.603131	1.36647	0.302097	1.32698	0.838351	NA	NA	NA	NA	NA	NA	NA	NA	NA	NA	NA	NA	NA	NA	NA	NA	NA	NA	NA	NA	NA
D-dichotoma_M_contig129.2208.1	OG0000014	0	0	0	5.34342	0	0	2.8361	0	0	0	0	0	3.86786	5.0457	3.86148	4.32156	2.62838	4.34722	4.34346	3.55337	4.37633	3.99271	3.67403	4.31765	3.52131	2.90037	3.68033	NA	NA	NA	NA	NA	NA	NA	NA	NA	NA	NA	NA	NA	NA	NA	NA	NA	NA	NA	NA	NA
D-dichotoma_M_contig129.2209.1	OG0000041	0	0	0	3.62227	0	0	0	0	0	0	0	0	0	0.608885	0.918746	0.242014	0.293208	0	2.37253	1.88167	0	0	0.428685	0.293353	0.551757	0	0	NA	NA	NA	NA	NA	NA	NA	NA	NA	NA	NA	NA	NA	NA	NA	NA	NA	NA	NA	NA	NA
D-dichotoma_M_contig129.2212.1	OG0000041	0	0	0	0	0	0	3.35209	0	0	0	3.47482	0	0	1.50476	2.44688	2.81295	2.40105	2.84212	3.55394	2.86097	2.81795	1.51849	2.70843	1.97501	2.66846	2.15336	2.64463	NA	NA	NA	NA	NA	NA	NA	NA	NA	NA	NA	NA	NA	NA	NA	NA	NA	NA	NA	NA	NA
D-dichotoma_M_contig1043.450.1	OG0009937	1.88155	0	0	3.62227	0	0	2.02518	0	0	0	3.47482	0	2.52902	3.67968	2.13218	3.28789	3.29118	3.67587	1.84265	2.04702	5.05638	4.81905	1.97858	2.62904	3.11883	3.86582	3.27323	NA	NA	NA	NA	NA	NA	NA	NA	NA	NA	NA	NA	NA	NA	NA	NA	NA	NA	NA	NA	NA
D-dichotoma_M_contig1045.464.1	OG0009938	0	0	0	0	0	0	0	0	0	0	0	0	0	0.336329	0	0	0	0	0	0	0	0	0	0	0	0	0	NA	NA	NA	NA	NA	NA	NA	NA	NA	NA	NA	NA	NA	NA	NA	NA	NA	NA	NA	NA	NA
D-dichotoma_M_contig1048.474.1	OG0009939	3.17858	2.64168	2.38634	0	0	0	3.35209	4.66512	4.44292	4.47172	0	3.16609	0	1.50476	0.236455	1.18808	0.293208	0.642448	1.25872	0.740931	2.07981	1.31727	1.44892	0.745413	0	0.896975	0.336476	NA	NA	NA	NA	NA	NA	NA	NA	NA	NA	NA	NA	NA	NA	NA	NA	NA	NA	NA	NA	NA
D-dichotoma_M_contig1048.476.1	OG0009940	0	0	0	0	0	3.38293	0	0	0	0	3.47482	0	0.308699	0	0	0	0	0.356693	0.6753	0.29131	0	0.804027	0.230207	0	0	0	0.336476	NA	NA	NA	NA	NA	NA	NA	NA	NA	NA	NA	NA	NA	NA	NA	NA	NA	NA	NA	NA	NA
D-dichotoma_M_contig943.20157.1	OG0009941	0	0	0	0	0	0	0	0	0	0	0	0	0.308699	0.336329	0.236455	0	0	0.642448	0.261803	0.29131	0.488969	0	0	0	0	0.281597	0.336476	NA	NA	NA	NA	NA	NA	NA	NA	NA	NA	NA	NA	NA	NA	NA	NA	NA	NA	NA	NA	NA
D-dichotoma_M_contig944.20165.1	OG0000688	4.79946	4.45696	5.12211	15.6898	15.147	15.3432	6.33684	5.48762	5.22156	3.53532	0	3.16609	0	0	1.16778	0	0	1.08539	1.76031	1.69489	0	0.457315	3.37047	3.53578	0	6.8157	3.89931	green	0.932824	-0.603173	-0.919359	0.0510335	-0.194891	0.269488	-0.0832799	-0.517293	-0.622865	-0.230562	1.39327e-12	0.000867284	1.26946e-11	0.800427	0.329982	0.174037	0.679623	0.00572356	0.000520427	0.247265
D-dichotoma_M_contig945.20172.1	OG0000689	4.09662	0	4.46868	6.32554	7.56301	5.58975	4.4914	2.5544	5.0056	5.43883	4.40844	5.04021	1.28187	2.05328	4.26045	1.29933	3.1518	1.92785	4.0805	2.86097	3.36165	2.3513	5.63769	2.13168	3.55029	3.05803	3.38627	turquoise	0.646088	-0.354145	-0.644674	0.146017	-0.143394	0.32296	0.034956	-0.49502	-0.4675	0.251953	0.000272242	0.0699295	0.000283621	0.467388	0.47551	0.10036	0.862577	0.00866017	0.0139396	0.204867
D-dichotoma_M_contig945.20176.1	OG0009942	0	0	0	0	0	0	0	0	0	0	0	0	0	0	0	0	0	0	0	0	0.488969	0	0	0	0	0	0	NA	NA	NA	NA	NA	NA	NA	NA	NA	NA	NA	NA	NA	NA	NA	NA	NA	NA	NA	NA	NA
D-dichotoma_M_contig946.20177.1	OG0009943	0	0	0	0	0	0	0	0	0	0	0	0	0.308699	0	0	0.630339	0	0	0	0.29131	0.853502	0	0	0	0	0	1.0361	NA	NA	NA	NA	NA	NA	NA	NA	NA	NA	NA	NA	NA	NA	NA	NA	NA	NA	NA	NA	NA
D-dichotoma_M_contig946.20178.1	OG0009944	2.67116	0	0	0	0	0	5.24204	0	0	4.87041	0	0	3.95922	5.96427	4.27379	4.18336	2.62838	4.568	4.87059	4.51902	2.81795	3.14285	4.69557	5.17695	3.94878	3.90786	3.55697	yellow	-0.585253	0.0917833	0.568119	-0.442495	-0.313194	0.200192	0.351604	0.425737	0.796473	0.0990122	0.00134236	0.648882	0.00199226	0.0208191	0.111673	0.316735	0.0721041	0.0268232	6.70875e-07	0.62318
D-dichotoma_M_contig781.18648.1	OG0009945	0	4.45696	0	3.62227	4.45286	3.38293	3.35209	0	0	3.01127	4.40844	0	2.33801	3.55633	2.49325	2.16034	3.53506	1.69773	2.31601	0.922202	1.14426	0.804027	1.62107	2.51984	1.39536	2.62596	3.76639	NA	NA	NA	NA	NA	NA	NA	NA	NA	NA	NA	NA	NA	NA	NA	NA	NA	NA	NA	NA	NA
D-dichotoma_M_contig781.18654.1	OG0009946	0	0	0	0	0	0	0	0	0	0	0	0	0	0.608885	0.236455	1.06754	0	0.642448	0	0.740931	0.488969	1.31727	0	1.59901	1.39536	1.44589	1.20998	NA	NA	NA	NA	NA	NA	NA	NA	NA	NA	NA	NA	NA	NA	NA	NA	NA	NA	NA	NA	NA
D-dichotoma_M_contig784.18674.1	OG0000690	5.05383	4.76569	5.43573	7.82837	7.97613	7.33398	7.1207	6.21167	7.38368	8.16511	8.86551	8.97583	8.88257	7.83351	8.30563	8.92456	8.72486	7.78543	8.47885	9.09763	8.08592	7.85722	9.06402	8.18586	7.7765	8.69789	8.94538	grey	-0.253498	-0.318463	0.125888	-0.553992	-0.218948	0.727288	0.588855	0.140873	0.607872	0.625402	0.202009	0.105457	0.531527	0.00271617	0.272539	1.72551e-05	0.00123203	0.483384	0.000770097	0.000486072
D-dichotoma_M_contig785.18679.1	OG0009947	3.55322	0	4.16295	6.22001	5.41954	5.27529	4.83965	2.5544	2.62933	5.93152	4.97057	3.16609	5.64817	5.86378	4.68679	6.422	4.68873	4.63468	5.64236	6.05171	4.96616	4.21181	5.80328	7.35579	6.14257	5.84477	5.33629	brown	-0.0630212	-0.503383	-0.0664554	-0.640652	-0.512207	0.733812	0.601734	0.128173	0.56078	0.281036	0.754825	0.00743648	0.741901	0.000318332	0.0063064	1.32594e-05	0.000899092	0.52404	0.00234433	0.155604
D-dichotoma_M_contig471.14709.1	OG0009948	1.88155	0	0	4.87213	0	0	3.73137	0	0	3.01127	0	0	4.23988	3.38563	2.85465	2.03736	0.927098	1.08539	2.80101	2.51065	1.77427	2.72132	3.98898	4.79871	4.78422	2.2868	2.45032	NA	NA	NA	NA	NA	NA	NA	NA	NA	NA	NA	NA	NA	NA	NA	NA	NA	NA	NA	NA	NA
D-dichotoma_M_contig472.14728.1	OG0009949	0	2.64168	0	4.87213	4.45286	0	2.8361	0	2.62933	2.17994	4.97057	3.16609	1.65412	2.44974	3.38391	3.84126	3.47784	3.64386	3.22605	3.58061	2.73296	2.12329	3.78683	2.8254	2.99784	3.16591	2.91967	NA	NA	NA	NA	NA	NA	NA	NA	NA	NA	NA	NA	NA	NA	NA	NA	NA	NA	NA	NA	NA
D-dichotoma_M_contig472.14729.1	OG0009950	3.55322	0	0	6.42387	6.40259	6.06659	4.27966	0	0	2.17994	0	0	3.11018	4.2367	3.6729	3.82276	3.44836	2.89748	3.62546	2.56621	2.21131	2.45307	4.36102	4.51551	3.66069	4.35039	4.277	blue	0.304558	-0.79598	-0.477473	-0.680769	-0.602599	0.721507	0.45604	-0.134734	0.296837	-0.155989	0.122442	6.89499e-07	0.0117821	9.30531e-05	0.000879864	2.16585e-05	0.0168125	0.502834	0.132698	0.43718
D-dichotoma_M_contig473.14748.1	OG0009951	3.17858	4.06365	2.38634	0	0	0	4.03141	2.5544	0	4.47172	0	4.0834	0	1.20958	1.04863	0.630339	1.36599	0.642448	1.92055	0.740931	1.93512	1.85235	2.21197	3.35683	1.11415	1.44589	3.52441	NA	NA	NA	NA	NA	NA	NA	NA	NA	NA	NA	NA	NA	NA	NA	NA	NA	NA	NA	NA	NA
D-dichotoma_M_contig473.14755.1	OG0009952	0	0	2.38634	4.87213	4.45286	4.87262	3.35209	0	3.50777	2.17994	0	3.16609	0	0.608885	0	0	0	0	0.483315	0	0	0	0	0.927471	0	1.32698	2.51804	NA	NA	NA	NA	NA	NA	NA	NA	NA	NA	NA	NA	NA	NA	NA	NA	NA	NA	NA	NA	NA
D-dichotoma_M_contig473.14759.1	OG0009953	8.48408	8.37137	8.65352	0	0	0	8.74076	8.09781	7.93551	9.03243	8.6279	8.6996	4.59355	5.46986	6.73379	5.33157	5.21171	3.64386	6.3254	6.14589	4.78801	4.12195	4.06551	3.88309	4.45708	3.68422	3.42206	blue	-0.316485	0.952918	0.594176	0.789398	0.557774	-0.76401	-0.362512	0.194172	-0.246036	0.211474	0.10776	1.82894e-14	0.0010834	9.86698e-07	0.00250319	3.52463e-06	0.063124	0.331806	0.216062	0.28965
D-dichotoma_M_contig473.14760.1	OG0009954	5.05383	2.64168	6.00954	0	0	0	4.4914	5.48762	5.0056	5.43883	6.16643	5.04021	2.52902	3.01589	4.59409	3.72651	3.07672	1.2645	3.75868	3.34679	1.59321	0.457315	2.62996	0.537017	1.92418	2.00632	2.05381	blue	-0.173555	0.809079	0.437557	0.743829	0.471384	-0.605206	-0.240148	0.125831	-0.303332	0.285487	0.386631	3.24632e-07	0.0224612	8.71739e-06	0.0130633	0.00082401	0.227605	0.531714	0.124031	0.148885
D-dichotoma_M_contig1255.1986.1	OG0009955	1.88155	0	0	0	0	0	0	0	0	2.17994	0	0	1.54039	3.192	1.56513	1.83066	1.97442	2.21609	1.13347	1.59157	0.488969	1.69506	2.36515	2.05547	1.51777	1.44589	1.6329	NA	NA	NA	NA	NA	NA	NA	NA	NA	NA	NA	NA	NA	NA	NA	NA	NA	NA	NA	NA	NA
D-dichotoma_M_contig1255.1988.1	OG0009956	6.64867	5.01986	5.43573	9.45633	7.85112	8.5633	5.96367	4.91865	6.09669	5.55175	4.97057	6.33559	6.72439	4.47675	6.80215	5.17991	4.68873	5.60534	4.81048	4.97408	4.90919	4.35016	5.71575	5.28101	5.11031	4.53609	5.06914	turquoise	0.721563	-0.614369	-0.832635	-0.0343555	-0.41529	0.393129	0.024344	-0.346625	-0.492919	-0.112147	2.16119e-05	0.000651404	7.17082e-08	0.864917	0.0312275	0.042498	0.904066	0.0765156	0.00899291	0.577583
D-dichotoma_M_contig1255.1990.1	OG0009957	5.27	4.76569	5.6932	5.53161	4.45286	6.42437	5.96367	5.32171	5.72449	5.43883	4.40844	5.04021	1.75954	2.44974	3.61117	0.630339	0	0.356693	3.13094	0.922202	0	0	2.26486	4.02972	2.16801	3.3295	5.42717	green	0.803102	0.0917316	-0.470291	0.626551	0.173937	-0.247438	-0.101307	-0.283117	-0.770652	0.0355798	4.60953e-07	0.649067	0.0133051	0.000471185	0.385572	0.213373	0.615108	0.152437	2.56564e-06	0.860148
D-dichotoma_M_contig1255.1996.1	OG0009958	5.36704	2.64168	3.77451	6.83471	5.41954	6.5747	6.58771	5.63641	5.40936	6.29811	6.81119	4.0834	3.02816	1.95901	2.24488	3.17573	1.97442	2.45623	3.34382	2.86097	2.81795	3.01555	5.21559	5.80201	5.10054	5.82296	5.91559	green	0.738024	-0.135429	-0.479804	0.3283	0.110984	0.0802253	0.138685	-0.21973	-0.497005	0.256564	1.11408e-05	0.500612	0.0113201	0.094548	0.581558	0.690792	0.490272	0.270787	0.00835552	0.196422
D-dichotoma_M_contig1257.2006.1	OG0009959	5.7007	6.65207	5.43573	2.73491	0	0	6.63305	5.63641	6.39229	7.04068	6.67497	7.32663	0	3.27259	2.34941	2.92127	2.62838	2.7246	2.47935	2.26417	1.14426	3.01555	2.62996	2.73056	2.50047	2.57468	1.6329	brown	0.064161	0.792603	0.254189	0.916527	0.622214	-0.66782	-0.344704	0.0459981	-0.538509	0.291448	0.750529	8.29993e-07	0.200741	1.92424e-11	0.000529574	0.00014119	0.0782719	0.819783	0.00375765	0.140216
D-dichotoma_M_contig1258.2008.1	OG0009960	3.85035	0	2.38634	0	0	0	4.03141	2.5544	2.62933	3.9189	5.68902	3.16609	4.42752	6.42732	3.98019	5.05072	3.83757	5.05555	5.59563	5.88146	5.92385	4.26875	5.1468	5.01535	6.06438	4.06474	2.91967	turquoise	-0.79967	0.362029	0.763631	-0.235416	-0.0762888	0.0244506	0.199007	0.491355	0.718494	0.32399	5.60782e-07	0.0635021	3.58798e-06	0.237176	0.70528	0.903647	0.319668	0.00924736	2.43297e-05	0.0992176
D-dichotoma_M_contig1258.2013.1	OG0009961	7.7534	7.88768	7.57949	0	0	0	8.52924	8.43909	8.3103	9.55007	8.92678	9.02083	5.83463	5.56893	4.24698	5.03474	5.09289	6.59045	5.53501	5.71936	7.85151	8.28227	6.21296	4.25087	4.94559	4.31958	8.66079	blue	-0.430561	0.901966	0.699472	0.617061	0.688263	-0.7226	-0.325614	0.277047	-0.0447266	0.261844	0.0249668	1.32458e-10	4.90726e-05	0.000607108	7.24125e-05	2.0756e-05	0.0974389	0.161807	0.824688	0.18705
D-dichotoma_M_contig380.12636.1	OG0009962	1.88155	0	2.38634	0	0	0	2.02518	0	0	0	0	0	0	0	0.439558	0	0	0.642448	0.483315	0.740931	0.488969	0	0.603131	1.08911	0.302097	0.517103	0	NA	NA	NA	NA	NA	NA	NA	NA	NA	NA	NA	NA	NA	NA	NA	NA	NA	NA	NA	NA	NA
D-dichotoma_M_contig380.12643.1	OG0009963	1.88155	0	0	0	0	0	0	0	0	2.17994	0	0	1.54039	0.838041	0.776001	1.29933	1.08869	2.21609	1.25872	1.35967	1.38613	1.31727	0.899188	1.48742	1.2616	1.05499	0	NA	NA	NA	NA	NA	NA	NA	NA	NA	NA	NA	NA	NA	NA	NA	NA	NA	NA	NA	NA	NA
D-dichotoma_M_contig634.17279.1	OG0009964	0	0	0	0	0	0	0	0	0	0	0	0	4.82974	6.4361	4.98332	4.56363	5.45348	5.21657	5.39194	4.75249	5.05638	5.04774	4.79782	5.60221	5.6615	4.33507	3.79397	yellow	-0.7567	-0.145518	0.552291	-0.783563	-0.386823	0.343632	0.413126	0.461865	0.976701	-0.0577391	4.94165e-06	0.468929	0.00281693	1.34178e-06	0.0462343	0.0792653	0.0322087	0.0152966	3.15584e-18	0.77483
D-dichotoma_M_contig219.7278.1	OG0000158	0	0	0	0	0	0	0	0	0	0	0	3.16609	0	0	0	0	0	0	0.6753	0	0	0	0	0	0.551757	0	0	NA	NA	NA	NA	NA	NA	NA	NA	NA	NA	NA	NA	NA	NA	NA	NA	NA	NA	NA	NA	NA
D-dichotoma_M_contig220.7335.1	OG0009965	0	0	0	0	0	0	0	0	0	3.01127	0	3.16609	0.308699	3.10663	2.99017	1.67433	2.68003	0	0	0.29131	0	0	1.53756	6.27919	5.91086	3.96871	2.704	pink	-0.236246	0.0194329	0.316644	-0.272021	-0.134148	0.244107	0.774671	0.224541	0.496748	0.296103	0.235478	0.923356	0.107574	0.169869	0.504711	0.219798	2.10635e-06	0.260168	0.00839448	0.133703
D-dichotoma_M_contig220.7337.1	OG0009966	0	0	0	2.73491	0	0	0	0	0	0	3.47482	0	0.966698	0	0.439558	0	0	0	0	0	0	0	4.03538	3.53578	2.99784	2.90037	3.68033	NA	NA	NA	NA	NA	NA	NA	NA	NA	NA	NA	NA	NA	NA	NA	NA	NA	NA	NA	NA	NA
D-dichotoma_M_contig220.7339.1	OG0009967	0	0	0	0	0	0	0	0	0	0	0	0	0.562846	3.06197	1.72911	3.53522	4.57056	1.92785	0.6753	1.22805	1.38613	1.85235	1.91382	3.96869	2.37652	3.23359	1.50522	NA	NA	NA	NA	NA	NA	NA	NA	NA	NA	NA	NA	NA	NA	NA	NA	NA	NA	NA	NA	NA
D-dichotoma_M_contig892.19688.1	OG0000691	5.90842	7.48526	6.79358	4.56247	6.7211	0	6.98741	7.50261	6.97152	8.30054	8.59052	7.46331	8.72067	8.04618	8.17482	8.21906	7.6503	8.91048	8.1535	8.19473	8.2421	9.22705	7.52114	8.16674	7.22733	7.57007	9.36869	turquoise	-0.709828	0.501891	0.742276	-0.0474375	0.217364	-0.202101	0.0734711	0.113411	0.53764	0.247526	3.37207e-05	0.00764355	9.31454e-06	0.814239	0.276111	0.312047	0.715712	0.573274	0.00382507	0.213204
D-dichotoma_M_contig892.19689.1	OG0009968	0	0	0	0	0	0	0	0	0	3.01127	0	0	0	0.336329	0	0	0	0.642448	0.261803	0	0	0	1.44892	0.927471	0.949901	0	0.609128	NA	NA	NA	NA	NA	NA	NA	NA	NA	NA	NA	NA	NA	NA	NA	NA	NA	NA	NA	NA	NA
D-dichotoma_M_contig892.19690.1	OG0009969	0	0	0	0	0	0	0	0	0	0	0	0	1.28187	0	0.617565	0.242014	0	0.356693	0.261803	0.922202	0	0	1.35447	2.20406	0.551757	0.896975	0	NA	NA	NA	NA	NA	NA	NA	NA	NA	NA	NA	NA	NA	NA	NA	NA	NA	NA	NA	NA	NA
D-dichotoma_M_contig893.19696.1	OG0009970	5.7007	2.64168	5.6932	0	0	0	6.87868	4.35734	4.04982	5.7541	5.37406	5.35334	0	1.03574	1.04863	2.27366	0	1.56726	0.6753	0.922202	1.14426	0.804027	0	0.927471	0.949901	0.719506	0.609128	brown	0.125755	0.746317	0.176279	0.924229	0.596853	-0.670314	-0.424168	-0.0685864	-0.59675	0.242033	0.531965	7.832e-06	0.379106	5.98575e-12	0.0010147	0.000130499	0.0274502	0.733915	0.00101725	0.223864
D-dichotoma_M_contig894.19699.1	OG0009971	0	0	0	0	0	0	0	0	0	0	0	0	0	0	0	1.83066	2.40105	0	0	0	0	1.51849	0	0	0	0.896975	0.609128	NA	NA	NA	NA	NA	NA	NA	NA	NA	NA	NA	NA	NA	NA	NA	NA	NA	NA	NA	NA	NA
D-dichotoma_M_contig1460.3361.1	OG0009972	8.37164	8.27703	8.49348	4.56247	0	0	8.76132	8.73152	9.46452	9.23202	8.98555	9.0858	7.61594	7.65897	8.44928	7.94207	7.61757	6.5693	7.96532	7.74907	7.92998	7.20173	7.66705	7.22491	6.98624	6.78501	8.03826	turquoise	-0.57571	0.886585	0.832714	0.462499	0.503221	-0.622729	-0.12006	0.512897	0.169826	0.224946	0.00167698	7.51561e-10	7.13172e-08	0.0151387	0.00745872	0.00052233	0.550845	0.00622451	0.397072	0.259288
D-dichotoma_M_contig1463.3372.1	OG0009973	4.93224	4.06365	4.93537	3.62227	0	4.87262	4.67601	3.42606	5.22156	5.43883	5.94738	5.61048	5.66183	4.8755	5.58547	5.86666	6.10032	5.19464	5.60156	5.73763	4.60878	4.2964	5.78076	5.12196	5.19531	5.33784	5.3915	turquoise	-0.5204	0.407833	0.666675	-0.0169161	0.145483	-0.0661222	0.248413	0.839514	0.454112	0.336682	0.00539037	0.0347132	0.000146352	0.933259	0.469036	0.743152	0.211515	4.41407e-08	0.0173404	0.0859408
D-dichotoma_M_contig1473.3411.1	OG0009974	6.68677	7.95016	6.89957	0	0	3.38293	8.2813	6.82155	5.85951	8.34822	7.8686	6.33559	1.41691	3.52376	2.74395	2.10016	2.13107	2.21609	3.06387	1.88167	3.30388	1.51849	3.29619	1.79923	1.73524	1.05499	1.75018	brown	0.108858	0.768877	0.194637	0.938442	0.585455	-0.717765	-0.431313	0.0195868	-0.612952	0.217098	0.588862	2.79573e-06	0.330627	4.82253e-13	0.00133597	2.50179e-05	0.0246869	0.922751	0.000675827	0.276713
D-dichotoma_M_contig149.3502.1	OG0009975	6.68677	6.11119	6.89957	8.6123	8.38974	7.24708	5.89089	5.77127	6.2021	5.31632	5.68902	6.01812	9.02351	6.80128	8.39764	7.57566	7.75786	7.8412	7.88015	7.76548	6.16193	6.34987	8.18721	7.64947	7.71225	6.1595	6.80198	blue	-0.0808118	-0.625691	-0.220164	-0.710076	-0.821613	0.577595	0.333004	-0.0384945	0.410068	-0.303644	0.688643	0.000482294	0.269818	3.34127e-05	1.49363e-07	0.00160569	0.0896411	0.848816	0.0336372	0.123624
D-dichotoma_M_contig149.3508.1	OG0000002	1.88155	0	0	2.73491	0	4.87262	2.02518	0	0	2.17994	0	0	4.27586	4.31491	3.47915	3.14627	2.72989	2.45623	3.52929	3.68469	2.64264	2.80069	4.42051	5.17695	4.24306	4.20623	3.65047	NA	NA	NA	NA	NA	NA	NA	NA	NA	NA	NA	NA	NA	NA	NA	NA	NA	NA	NA	NA	NA
D-dichotoma_M_contig149.3515.1	OG0009976	6.99074	7.3983	7.0907	2.73491	0	5.27529	8.75107	7.4633	7.84075	9.08966	9.40706	9.2834	7.36137	8.31594	8.15783	7.70757	7.73972	7.08656	7.81025	8.34625	7.86655	7.1267	7.25967	8.37215	7.84679	7.40925	7.79037	turquoise	-0.593217	0.759417	0.83276	0.306394	0.400845	-0.403613	0.048038	0.679431	0.313121	0.396589	0.00110898	4.36441e-06	7.10941e-08	0.120092	0.0382566	0.0368199	0.811929	9.72413e-05	0.111762	0.0405525
D-dichotoma_M_contig149.3516.1	OG0000339	4.6532	2.64168	0	2.73491	0	0	4.98661	4.91865	3.50777	6.23186	6.81119	6.59564	3.1495	5.26841	5.30912	5.39556	5.62798	4.38644	4.67096	5.30324	4.37633	4.61459	4.53259	5.13127	4.15148	4.83739	5.2493	turquoise	-0.507134	0.497819	0.650509	0.104753	0.281259	-0.0465566	0.23854	0.454586	0.413962	0.609533	0.00693682	0.00823307	0.000239185	0.603071	0.155263	0.817631	0.230828	0.0172095	0.0318264	0.000738091
D-dichotoma_M_contig149.3517.1	OG0009977	0	0	0	0	0	0	0	0	0	0	0	0	0	0	0	0	0	0	0.261803	0	0	0	1.44892	0.537017	0.76452	0.517103	0.336476	NA	NA	NA	NA	NA	NA	NA	NA	NA	NA	NA	NA	NA	NA	NA	NA	NA	NA	NA	NA	NA
D-dichotoma_M_contig150.3591.1	OG0009978	0	0	0	2.73491	0	0	0	0	0	0	0	0	2.69768	2.7034	3.28194	1.67433	2.51919	2.45623	3.64854	3.68469	1.14426	3.25982	3.90816	3.32472	2.91115	3.39008	2.64463	NA	NA	NA	NA	NA	NA	NA	NA	NA	NA	NA	NA	NA	NA	NA	NA	NA	NA	NA	NA	NA
D-dichotoma_M_contig150.3593.1	OG0009979	0	3.52119	3.77451	6.22001	4.45286	7.1546	2.02518	4.35734	5.0056	4.68479	6.35656	6.18557	4.10636	4.3709	4.76447	5.8576	5.64107	4.20087	4.3004	5.07329	4.0991	3.36801	4.39701	4.06901	2.55867	5.11371	4.78291	grey	0.259279	-0.429279	-0.347127	-0.22535	-0.026536	0.585867	0.316891	0.0327323	-0.0255845	0.466142	0.191562	0.0254494	0.0760621	0.25841	0.895472	0.00132299	0.107285	0.871245	0.899201	0.0142571
D-dichotoma_M_contig150.3600.1	OG0009980	7.98506	8.37137	8.71288	5.69807	4.45286	3.38293	8.05016	8.26715	8.85387	7.68523	8.51273	8.32213	7.9427	8.00991	8.54662	8.6657	8.78654	8.34662	8.75084	8.84732	7.08051	7.5217	8.52129	8.47538	7.96717	8.60831	8.01501	turquoise	-0.693016	0.779524	0.895464	0.224676	0.3044	-0.490658	-0.00687729	0.481392	0.389261	0.116509	6.15276e-05	1.65097e-06	2.85082e-10	0.259874	0.122646	0.00936262	0.972841	0.011014	0.0447604	0.562772
D-dichotoma_M_contig2756.9502.1	OG0009981	0	2.64168	0	2.73491	0	0	4.83965	3.42606	4.04982	3.9189	4.40844	5.35334	7.66595	7.50275	6.84524	6.78185	5.77178	7.70626	7.17653	7.01107	7.58972	6.70482	6.70196	7.43876	7.31436	6.24398	7.35396	turquoise	-0.745372	0.107529	0.672971	-0.509703	-0.141741	0.240716	0.376501	0.54192	0.874762	0.273031	8.15824e-06	0.593447	0.000119903	0.00661126	0.480668	0.226473	0.0529058	0.00350298	2.42926e-09	0.168227
D-dichotoma_M_contig2757.9504.1	OG0009982	3.17858	0	0	0	0	0	2.8361	3.42606	2.62933	5.7541	4.40844	4.63971	2.33801	3.76574	2.29809	2.03736	1.59849	0.880852	2.06475	3.24832	0.853502	0.457315	4.08034	0.293353	2.24091	1.05499	1.75018	blue	-0.224941	0.535729	0.385167	0.426341	0.178055	-0.135452	0.156506	0.159904	0.00278734	0.654373	0.259297	0.0039768	0.0472576	0.0265848	0.374243	0.500541	0.435644	0.425617	0.988991	0.000213242
D-dichotoma_M_contig2760.9518.1	OG0009983	8.37164	8.73297	7.99265	0	0	0	7.96408	7.9634	7.87303	7.22223	7.59426	7.2531	8.10277	9.27873	8.4478	8.8794	8.56751	9.43722	9.30186	9.07865	9.39993	9.23154	8.1251	9.30871	9.82551	9.14503	8.62572	turquoise	-0.854641	0.726683	0.987281	0.0496309	0.282822	-0.485427	-0.0178934	0.551073	0.575567	0.0281667	1.3959e-08	1.76749e-05	1.72931e-21	0.805808	0.152883	0.0102674	0.929412	0.002891	0.00168247	0.889086
D-dichotoma_M_contig2761.9519.1	OG0009984	3.55322	2.64168	5.43573	0	0	3.38293	2.02518	2.5544	3.50777	4.47172	4.40844	0	6.32575	5.28793	6.72895	6.21412	6.08123	5.89777	6.19041	6.56267	3.30388	3.81295	5.42179	5.51953	5.24046	5.2425	4.75511	turquoise	-0.680173	0.181321	0.65897	-0.403947	-0.226184	0.0300137	0.266653	0.571359	0.727054	-0.0457889	9.48994e-05	0.365399	0.000185624	0.0366496	0.256606	0.881862	0.178787	0.00185195	1.74162e-05	0.82059
D-dichotoma_M_contig2763.9521.1	OG0000692	8.99745	8.93184	9.34908	2.73491	4.45286	3.38293	8.87889	8.94632	8.66398	8.74246	8.92678	9.55219	11.182	10.3528	10.7572	11.2597	11.0927	11.002	10.5288	10.4432	11.6847	11.4534	10.5108	10.6223	11.0454	11.0385	10.9992	turquoise	-0.916434	0.561489	0.958973	-0.163712	0.209592	-0.292553	0.127437	0.497923	0.729404	0.0715401	1.9501e-11	0.00230812	3.38157e-15	0.414531	0.294064	0.13865	0.526446	0.00821769	1.58548e-05	0.722891
D-dichotoma_M_contig2763.9522.1	OG0009985	8.07399	2.64168	5.6932	4.56247	0	0	8.68803	4.35734	0	8.55199	5.94738	4.0834	0	0	0	0	0	0	0	0	0	0.457315	0	0.293353	0	0.517103	0	brown	0.353583	0.471698	-0.0891328	0.805278	0.416978	-0.461399	-0.31819	-0.0964053	-0.646931	0.210913	0.0704059	0.0129947	0.658407	4.06273e-07	0.0304787	0.0154137	0.105773	0.632401	0.000265643	0.290961
D-dichotoma_M_contig2764.9524.1	OG0009986	0	0	0	2.73491	0	0	2.02518	0	0	0	0	0	2.74979	2.86809	1.04863	2.21812	3.53506	3.09983	2.67183	2.86097	3.24371	3.51646	4.00462	2.9982	2.31031	2.98135	3.38627	NA	NA	NA	NA	NA	NA	NA	NA	NA	NA	NA	NA	NA	NA	NA	NA	NA	NA	NA	NA	NA
D-dichotoma_M_contig2765.9525.1	OG0009987	0	0	0	3.62227	0	0	2.02518	0	0	3.53532	0	3.16609	2.74979	2.14177	3.30812	1.58932	0.927098	1.92785	1.67299	1.48027	1.38613	0.457315	5.29402	4.34991	3.88197	2.46632	2.81586	NA	NA	NA	NA	NA	NA	NA	NA	NA	NA	NA	NA	NA	NA	NA	NA	NA	NA	NA	NA	NA
D-dichotoma_M_contig2766.9530.1	OG0009988	6.52795	6.21661	6.73752	4.56247	4.45286	3.38293	5.45897	7.05099	6.71078	5.65647	4.40844	3.16609	5.87037	6.25454	6.10547	5.38299	6.79996	5.63007	5.86555	6.03703	4.56027	4.40198	5.99157	5.87588	5.50009	5.27498	4.40772	turquoise	-0.393557	0.487019	0.47732	0.176878	-0.0327583	-0.546663	-0.169318	0.196945	0.120497	-0.440276	0.0422537	0.00998459	0.0118129	0.377461	0.871144	0.00317334	0.398506	0.324811	0.549387	0.0215445
D-dichotoma_M_contig2768.9534.1	OG0009989	4.30692	5.58992	4.16295	0	0	0	4.27966	4.66512	5.22156	5.93152	4.97057	4.0834	2.03621	2.7034	4.01239	2.81295	3.18793	1.69773	2.31601	2.39267	1.77427	1.31727	2.92108	0.745413	3.1942	3.09489	2.704	blue	-0.191442	0.883768	0.502645	0.782862	0.609995	-0.725724	-0.189605	0.14282	-0.292244	0.23188	0.33878	1.00531e-09	0.00753824	1.39136e-06	0.000729392	1.83599e-05	0.343523	0.4773	0.139086	0.244498
D-dichotoma_M_contig95.20214.1	OG0000008	3.17858	0	4.93537	0	0	0	6.58771	2.5544	2.62933	4.22163	5.37406	0	4.04513	6.9342	6.957	6.31354	6.84873	4.86041	6.24062	5.51571	4.22893	3.95851	5.08931	6.51087	5.89965	5.33784	5.22924	turquoise	-0.668666	0.304712	0.710622	-0.281673	-0.0567759	0.000506919	0.302181	0.480624	0.717582	0.121066	0.00013748	0.122244	3.27428e-05	0.154629	0.778493	0.997998	0.125535	0.0111613	2.51939e-05	0.547486
D-dichotoma_M_contig95.20222.1	OG0000693	1.88155	4.06365	3.24132	0	0	3.38293	3.35209	3.96558	4.75152	3.53532	5.94738	5.04021	4.6357	4.6825	5.59081	5.76856	5.73563	4.38644	5.10551	5.57108	5.15769	4.09071	5.00632	4.36578	3.57869	5.15793	4.97588	turquoise	-0.679142	0.436156	0.75389	-0.102997	0.258428	-0.085854	0.181833	0.589881	0.553193	0.346911	9.81672e-05	0.0229457	5.60995e-06	0.609191	0.193076	0.670262	0.364024	0.00120207	0.00276308	0.0762573
D-dichotoma_M_contig96.20298.1	OG0000336	6.92851	7.04455	6.67919	0	0	0	8.25253	7.54087	8.02442	8.73051	9.06946	9.0858	8.94955	9.12509	8.64168	9.4238	9.37996	9.14941	9.16953	9.60255	9.62152	9.816	8.74487	9.49335	9.18473	9.55075	9.37041	turquoise	-0.848341	0.685225	0.974293	0.0193759	0.315559	-0.332031	0.103077	0.549455	0.62129	0.264442	2.28884e-08	8.02309e-05	1.06511e-17	0.92358	0.108851	0.0906394	0.608913	0.002992	0.000542801	0.182554
D-dichotoma_M_contig96.20316.1	OG0000694	7.41055	7.78858	7.75918	6.32554	7.56301	4.87262	8.52924	8.2898	8.60753	9.60344	9.73286	9.4407	5.80415	5.66164	7.13755	5.9242	5.43104	4.38644	5.37821	4.75249	5.20579	4.45201	7.41545	6.0578	5.81264	5.95414	6.04175	brown	0.344363	0.530366	-0.0664503	0.849624	0.456299	-0.404905	-0.0684976	-0.345585	-0.660883	0.440443	0.078587	0.00443038	0.74192	2.07337e-08	0.0167425	0.0361644	0.734247	0.0774629	0.000175097	0.0214892
D-dichotoma_M_contig97.20381.1	OG0000695	6.56932	7.30576	7.57949	0	0	0	8.1155	7.68453	8.02442	8.70632	8.86551	8.58441	7.76263	7.6439	7.51299	7.94848	7.64706	7.35476	7.84563	7.76548	6.6002	6.60885	8.22023	8.07322	8.16161	8.19609	6.9318	turquoise	-0.729376	0.845634	0.94293	0.286481	0.374308	-0.491138	0.0588936	0.485467	0.394943	0.294889	1.58732e-05	2.81163e-08	1.91871e-13	0.147413	0.0544157	0.00928309	0.770445	0.0102603	0.0414692	0.13538
D-dichotoma_M_contig97.20388.1	OG0009990	3.17858	5.23588	4.72082	9.45633	8.38974	8.63351	4.67601	5.13421	4.75152	4.68479	3.47482	5.61048	7.13765	4.84946	6.50114	5.6685	5.9921	5.87726	5.76884	6.19077	3.18092	3.99271	6.86072	6.13389	5.37611	4.84823	4.96379	blue	0.470003	-0.790906	-0.682441	-0.454738	-0.687505	0.676577	0.308975	-0.24465	-0.0568092	-0.126941	0.0133695	9.09939e-07	8.80432e-05	0.0171675	7.42963e-05	0.000106739	0.116843	0.218742	0.778366	0.52807
D-dichotoma_M_contig97.20389.1	OG0009991	5.45797	5.87397	5.80653	9.53545	8.848	9.32726	5.24204	5.48762	6.56031	6.59016	6.67497	6.59564	5.49631	4.99909	5.51979	6.75527	6.64615	5.51088	5.28557	5.97167	5.14129	5.11139	5.91917	5.40902	4.45708	6.30424	6.63282	turquoise	0.810143	-0.686808	-0.88694	-0.0794943	-0.108581	0.534414	0.116605	-0.432031	-0.486113	0.104113	3.04604e-07	7.60689e-05	7.24077e-10	0.693475	0.589816	0.00408415	0.562448	0.0244221	0.0101447	0.605298
D-dichotoma_M_contig3230.11154.1	OG0009992	1.88155	0	0	0	0	0	2.02518	0	0	0	4.97057	0	2.74979	0.838041	0	0.242014	0	1.2645	0	0.740931	0.488969	0	2.92108	1.88979	2.01012	1.32698	0.336476	NA	NA	NA	NA	NA	NA	NA	NA	NA	NA	NA	NA	NA	NA	NA	NA	NA	NA	NA	NA	NA
D-dichotoma_M_contig3234.11164.1	OG0000696	6.92851	7.71852	6.55494	0	0	0	7.15218	7.81516	8.05288	7.41367	7.59426	7.75725	5.86448	7.10901	6.63642	6.37515	5.98185	6.38307	6.5131	6.66164	6.48145	6.12162	7.21333	6.73507	6.91004	6.22332	6.25026	blue	-0.671455	0.920476	0.911203	0.419327	0.451226	-0.645605	-0.0941206	0.44097	0.251056	0.20613	0.00012585	1.07302e-11	4.04641e-11	0.0294613	0.0181564	0.000276079	0.640527	0.0213152	0.206537	0.302292
D-dichotoma_M_contig3240.11184.1	OG0009993	0	0	0	0	0	0	0	0	0	0	0	0	0	0	0	0	0	0	0	0	0	0	0	0	0	0	0	NA	NA	NA	NA	NA	NA	NA	NA	NA	NA	NA	NA	NA	NA	NA	NA	NA	NA	NA	NA	NA
D-dichotoma_M_contig3245.11190.1	OG0009994	0	0	0	7.03469	6.7211	7.1546	2.02518	2.5544	0	0	0	0	0	0	0.617565	0	0	0	0	0	0	0	0	0.293353	0	0.517103	2.22569	turquoise	0.84306	-0.769638	-0.943843	-0.163697	-0.30565	0.46629	0.0226679	-0.478705	-0.464948	-0.170156	3.40683e-08	2.69498e-06	1.57623e-13	0.414573	0.121039	0.0142222	0.910644	0.0115361	0.0145414	0.39614
D-dichotoma_M_contig3245.11192.1	OG0009995	3.55322	0	0	8.75136	9.08852	9.28426	3.73137	3.42606	4.04982	3.01127	0	0	1.54039	2.05328	0	0.449203	0	1.69773	2.06475	0.740931	1.93512	1.99417	1.14471	3.41898	2.24091	4.06474	4.78291	turquoise	0.801495	-0.7041	-0.836205	-0.179945	-0.275046	0.400166	0.0355009	-0.438419	-0.365768	-0.196811	5.05509e-07	4.15778e-05	5.59011e-08	0.369111	0.164983	0.0386159	0.860455	0.0221672	0.0606193	0.325145
D-dichotoma_M_contig1806.5329.1	OG0009996	0	2.64168	0	0	0	0	0	3.42606	0	0	0	0	0	0	0	0.935998	0	0	0	0	1.93512	0	0	0	0	0	1.20998	NA	NA	NA	NA	NA	NA	NA	NA	NA	NA	NA	NA	NA	NA	NA	NA	NA	NA	NA	NA	NA
D-dichotoma_M_contig1807.5336.1	OG0009997	2.67116	2.64168	3.77451	0	0	0	0	2.5544	3.50777	0	0	0	0	0	0	4.29496	2.05487	0	0.261803	0	4.53538	3.77415	0.603131	0	0.302097	2.2868	3.68033	NA	NA	NA	NA	NA	NA	NA	NA	NA	NA	NA	NA	NA	NA	NA	NA	NA	NA	NA	NA	NA
D-dichotoma_M_contig1810.5362.1	OG0009998	5.7007	5.73892	5.6932	0	4.45286	0	5.96367	5.8946	5.72449	6.01267	5.37406	6.33559	6.61276	6.91236	6.87181	5.43264	4.87753	6.50837	6.99265	6.53509	4.80893	5.20189	6.60786	6.55305	7.0177	5.67257	4.23737	turquoise	-0.737607	0.682543	0.810792	0.138174	0.0154518	-0.383376	0.0238049	0.119534	0.432505	0.127273	1.13362e-05	8.77454e-05	2.92938e-07	0.491888	0.939025	0.0483838	0.906181	0.552603	0.0242485	0.526984
D-dichotoma_M_contig969.20376.1	OG0009999	0	0	0	0	0	0	0	0	0	0	0	0	0	0	0	0	0	0	0	0	0	0	0	0	0	0	0	NA	NA	NA	NA	NA	NA	NA	NA	NA	NA	NA	NA	NA	NA	NA	NA	NA	NA	NA	NA	NA
D-dichotoma_M_contig970.20401.1	OG0000697	5.36704	4.06365	5.5702	3.62227	6.40259	4.87262	5.89089	5.8946	6.39229	7.8924	8.66434	8.88139	8.78996	8.03034	8.87792	9.2594	9.40655	8.47044	8.71508	9.07507	8.01118	8.17091	8.71251	8.60301	8.19181	9.18457	8.58485	turquoise	-0.696253	0.123659	0.62231	-0.43785	-0.0654623	0.324211	0.476046	0.280825	0.798473	0.488758	5.49711e-05	0.538878	0.000528224	0.0223609	0.745632	0.0989749	0.0120726	0.155928	5.99931e-07	0.00968321
D-dichotoma_M_contig973.20421.1	OG0000698	8.14412	7.8554	7.89351	15.538	15.1799	15.2983	9.08054	8.73152	9.27217	11.2045	11.819	11.4638	10.722	10.0936	10.0814	11.1997	10.7467	10.5002	10.3911	10.657	11.0602	10.8891	10.4909	10.2384	9.87503	10.9266	11.4784	blue	0.559747	-0.87227	-0.785536	-0.445573	-0.344629	0.851697	0.306811	-0.351105	-0.0971779	0.281068	0.00239791	3.06434e-09	1.21058e-06	0.0198461	0.0783414	1.76369e-08	0.119562	0.0725373	0.629663	0.155555
D-dichotoma_M_contig973.20425.1	OG0010000	0	0	0	0	0	0	3.73137	0	3.50777	3.53532	0	3.16609	2.33801	2.05328	3.11404	1.4026	4.08752	1.2645	4.94703	3.37817	1.38613	1.69506	2.4128	2.05547	1.6306	1.05499	0.838351	NA	NA	NA	NA	NA	NA	NA	NA	NA	NA	NA	NA	NA	NA	NA	NA	NA	NA	NA	NA	NA
D-dichotoma_M_contig467.14621.1	OG0010001	3.85035	3.52119	2.38634	0	0	0	4.4914	3.96558	4.44292	3.01127	3.47482	4.0834	1.41691	3.38563	2.7818	3.72651	2.62838	2.7246	0	0.29131	0	2.72132	1.35447	3.38824	2.61461	2.90037	2.22569	NA	NA	NA	NA	NA	NA	NA	NA	NA	NA	NA	NA	NA	NA	NA	NA	NA	NA	NA	NA	NA
D-dichotoma_M_contig468.14637.1	OG0010002	0	0	0	4.56247	0	0	2.02518	0	0	0	0	0	0.308699	1.63242	1.16778	1.18808	0	0.356693	0.996303	0.533566	0	1.08335	1.14471	2.27299	0.551757	1.55574	3.61997	NA	NA	NA	NA	NA	NA	NA	NA	NA	NA	NA	NA	NA	NA	NA	NA	NA	NA	NA	NA	NA
D-dichotoma_M_contig468.14638.1	OG0010003	2.67116	2.64168	0	2.73491	4.45286	3.38293	2.02518	0	0	3.53532	0	4.0834	0.308699	1.36471	0.617565	1.4026	0.536773	0.356693	1.13347	0.922202	0	0.457315	1.2534	2.51984	1.11415	1.92676	2.9689	NA	NA	NA	NA	NA	NA	NA	NA	NA	NA	NA	NA	NA	NA	NA	NA	NA	NA	NA	NA	NA
D-dichotoma_M_contig469.14653.1	OG0010004	5.36704	5.87397	4.93537	3.62227	4.45286	4.31207	6.91584	5.13421	6.2021	6.59016	5.94738	7.09375	2.84867	4.79593	2.44688	3.87757	3.83757	4.11005	4.04615	3.46843	4.34803	4.18247	4.44363	3.90497	3.78779	4.02709	3.89931	brown	0.280836	0.569689	-0.0179196	0.865361	0.62203	-0.491551	-0.350477	-0.228891	-0.650679	0.364827	0.15591	0.00192317	0.929309	5.69323e-09	0.000532197	0.0092152	0.0730855	0.250804	0.000237989	0.0613345
D-dichotoma_M_contig469.14654.1	OG0000699	4.49042	5.01986	2.38634	0	4.45286	4.87262	4.98661	5.77127	5.57551	4.68479	5.37406	5.35334	2.40453	3.82038	2.66513	3.78503	4.4116	3.09983	3.02913	3.68469	3.11526	3.77415	3.37047	3.38824	2.61461	3.96871	3.34956	grey	0.0928166	0.469362	0.0915903	0.586164	0.538379	-0.397523	-0.241486	-0.257447	-0.395454	0.264912	0.645183	0.0135137	0.649574	0.00131369	0.00376769	0.0400392	0.224945	0.194833	0.0411829	0.181748
D-dichotoma_M_contig110.874.1	OG0000700	6.19942	5.42373	6.41897	10.5885	9.47492	10.0844	4.98661	6.11352	6.47874	6.48033	6.81119	6.59564	7.11796	6.89337	7.4394	8.74767	8.25911	7.7082	7.65084	7.9647	8.46929	8.10012	7.36638	7.57636	7.07366	8.31803	7.84414	blue	0.300097	-0.920022	-0.594035	-0.727053	-0.416558	0.805416	0.275106	-0.122845	0.189678	-0.0552309	0.128293	1.14926e-11	0.00108711	1.74171e-05	0.0306634	4.03005e-07	0.164887	0.541575	0.343332	0.784379
D-dichotoma_M_contig110.882.1	OG0010005	6.39619	6.31485	6.10125	4.16764	0	3.38293	6.80136	6.47145	6.2021	6.23186	5.94738	6.47146	8.35066	8.2725	8.82678	8.09638	7.47317	6.90601	8.34135	7.69557	7.91559	7.27304	8.32357	8.34239	7.86565	7.77278	8.17697	turquoise	-0.78897	0.4737	0.894003	-0.196059	0.0686443	-0.203081	0.239009	0.805584	0.72559	0.063996	1.0095e-06	0.0125631	3.36324e-10	0.327035	0.733698	0.309656	0.229885	3.99081e-07	1.84571e-05	0.75115
D-dichotoma_M_contig110.885.1	OG0010006	1.88155	0	0	6.10614	5.41954	6.25655	2.02518	2.5544	0	4.22163	4.40844	4.0834	0	1.20958	0.439558	0.449203	0	0.642448	0.483315	0.29131	0.488969	0	0.230207	0	0.76452	0	1.20998	turquoise	0.793364	-0.451179	-0.82407	0.214565	-0.09285	0.398453	0.0269742	-0.458635	-0.632972	0.363128	7.96238e-07	0.01817	1.27384e-07	0.282493	0.645064	0.0395337	0.893756	0.0161226	0.000395062	0.062644
D-dichotoma_M_contig110.886.1	OG0010007	8.05954	7.75398	8.0854	8.6123	8.19771	8.96836	7.73376	8.33405	8.78767	10.341	10.9906	10.5965	10.6846	9.61693	10.5719	10.4886	10.6863	10.2463	9.79738	10.3364	11.6701	10.899	9.55327	9.97569	9.09908	10.0291	10.2509	turquoise	-0.564989	-0.0373031	0.417256	-0.438067	0.0488362	0.396912	0.329681	0.374514	0.641259	0.541332	0.00213643	0.853445	0.0303566	0.0222866	0.80886	0.0403746	0.0930867	0.0542722	0.000312866	0.0035458
D-dichotoma_M_contig111.948.1	OG0010008	0	0	0	0	0	0	0	0	0	0	0	0	0	0	0.617565	0.242014	0	0	0	0	0	0	0.230207	0	0	0	0	NA	NA	NA	NA	NA	NA	NA	NA	NA	NA	NA	NA	NA	NA	NA	NA	NA	NA	NA	NA	NA
D-dichotoma_M_contig152.3689.1	OG0010009	4.93224	5.42373	5.12211	0	0	0	3.73137	4.66512	5.72449	4.68479	5.68902	4.63971	6.04213	4.8095	5.47427	5.10533	5.02461	5.23817	5.37129	5.47274	4.31917	5.15735	5.13974	5.44681	5.27558	4.91159	4.71239	turquoise	-0.805987	0.777396	0.956946	0.160889	0.273287	-0.502921	-0.00112305	0.512434	0.464573	0.116167	3.89763e-07	1.83848e-06	6.11172e-15	0.422734	0.167812	0.00750015	0.995564	0.00627937	0.0146314	0.563928
D-dichotoma_M_contig152.3690.1	OG0010010	5.16596	2.64168	5.9116	2.73491	0	0	3.35209	4.66512	4.44292	5.7541	4.97057	3.16609	6.23269	5.80403	6.30388	6.77706	6.61332	6.12349	5.96081	6.12291	6.04339	6.49415	5.8386	6.06267	6.02879	6.22332	6.75714	turquoise	-0.811165	0.421581	0.857321	-0.249325	0.106354	-0.168729	0.209722	0.630039	0.741538	0.0659487	2.86421e-07	0.0285105	1.12312e-08	0.209789	0.597512	0.400173	0.293758	0.000428377	9.61081e-06	0.743804
D-dichotoma_M_contig153.3763.1	OG0000002	1.88155	0	0	0	0	0	3.73137	0	2.62933	2.17994	0	3.16609	4.57922	6.012	5.45683	4.99397	3.74361	3.35841	4.74776	4.64047	2.21131	1.99417	3.67403	4.58493	3.52131	3.77787	2.58273	turquoise	-0.661199	0.118581	0.609158	-0.444487	-0.297699	0.228924	0.411453	0.442878	0.800385	0.136553	0.000173409	0.555797	0.000745217	0.0201851	0.131523	0.250733	0.0329839	0.0206959	5.385e-07	0.497032
D-dichotoma_M_contig4497.14257.1	OG0010011	4.93224	0	4.72082	0	0	0	4.03141	5.48762	5.0056	5.18244	4.97057	4.0834	0.308699	0	0	0	0	0.880852	2.06475	1.48027	0	0	1.62107	1.88979	2.31031	1.44589	1.85865	NA	NA	NA	NA	NA	NA	NA	NA	NA	NA	NA	NA	NA	NA	NA	NA	NA	NA	NA	NA	NA
D-dichotoma_M_contig4501.14307.1	OG0000006	1.88155	0	0	3.62227	5.41954	0	3.35209	0	0	3.53532	4.40844	0	3.77033	4.47675	3.35909	3.91298	2.95621	3.19127	3.22605	3.21394	3.57203	2.80069	3.63438	3.64382	3.60655	2.94143	2.91967	NA	NA	NA	NA	NA	NA	NA	NA	NA	NA	NA	NA	NA	NA	NA	NA	NA	NA	NA	NA	NA
D-dichotoma_M_contig4501.14308.1	OG0000014	0	0	0	6.10614	0	0	2.8361	0	0	2.17994	0	0	0.966698	2.76041	2.13218	1.29933	1.59849	0.880852	2.80101	0.922202	1.14426	0.457315	1.97858	1.97501	1.2616	1.05499	0.838351	grey	0.0842163	-0.33026	-0.143603	-0.312804	-0.373974	0.433948	0.289359	0.273585	0.237689	0.080867	0.676212	0.0924796	0.474862	0.112144	0.0546483	0.0237267	0.143211	0.16733	0.232544	0.688441
D-dichotoma_M_contig4502.14309.1	OG0010012	0	0	0	0	4.45286	0	0	0	0	0	0	0	2.69768	3.58817	2.07235	1.49898	2.05487	3.05184	2.13179	2.51065	0.488969	1.08335	2.88774	3.47856	3.11883	2.62596	1.0361	NA	NA	NA	NA	NA	NA	NA	NA	NA	NA	NA	NA	NA	NA	NA	NA	NA	NA	NA	NA	NA
D-dichotoma_M_contig4508.14312.1	OG0010013	0	0	0	0	0	0	0	0	0	0	0	0	0.308699	0	0	0	0	0	0	0	0	0	0	0	0	0	0	NA	NA	NA	NA	NA	NA	NA	NA	NA	NA	NA	NA	NA	NA	NA	NA	NA	NA	NA	NA	NA
D-dichotoma_M_contig4511.14335.1	OG0010014	8.34806	4.06365	3.77451	14.462	10.3407	10.6647	8.33715	4.66512	3.50777	8.49665	5.37406	4.63971	5.62743	6.9311	6.49546	5.29847	6.03736	6.47692	6.63941	6.15498	5.91423	6.34326	6.80823	6.11054	7.0383	6.10633	5.87097	turquoise	0.606777	-0.727968	-0.757024	-0.275558	-0.474112	0.591616	0.143326	-0.245138	-0.198553	-0.0206822	0.000791863	1.67937e-05	4.86957e-06	0.164167	0.0124758	0.00115283	0.475723	0.217795	0.320797	0.918445
D-dichotoma_M_contig4513.14337.1	OG0010015	4.30692	5.87397	5.12211	0	0	0	6.84054	4.91865	5.22156	7.11606	5.94738	6.01812	0.308699	1.63242	0.776001	1.58932	1.36599	0	0.844711	0.740931	2.21131	0	0.230207	0	0	0	0	brown	0.138643	0.749351	0.140332	0.962084	0.669875	-0.677838	-0.42762	-0.102235	-0.656376	0.278384	0.490406	6.86157e-06	0.485085	1.28347e-15	0.000132327	0.000102447	0.0260857	0.611855	0.000200797	0.159709
D-dichotoma_M_contig398.13054.1	OG0010016	0	0	0	0	0	0	0	0	0	0	0	0	0	0	0	0	0	0	0	0	0	0	0	0	0	0	0	NA	NA	NA	NA	NA	NA	NA	NA	NA	NA	NA	NA	NA	NA	NA	NA	NA	NA	NA	NA	NA
D-dichotoma_M_contig398.13061.1	OG0010017	0	0	0	0	0	0	0	0	0	0	0	0	0	1.03574	0	0.449203	0	0	0	0.29131	0	0	0	0	0	0	0.336476	NA	NA	NA	NA	NA	NA	NA	NA	NA	NA	NA	NA	NA	NA	NA	NA	NA	NA	NA	NA	NA
D-dichotoma_M_contig400.13169.1	OG0000701	8.71361	8.27703	8.95336	4.87213	4.45286	4.87262	8.56477	8.31209	8.88586	6.01267	6.93564	7.39659	11.7542	11.0242	11.3119	11.5019	11.425	10.8915	11.4283	11.5375	9.11089	10.2631	10.9375	10.9888	10.8956	10.8448	10.6361	turquoise	-0.846933	0.293973	0.829903	-0.429002	-0.127449	-0.101315	0.219702	0.582971	0.844112	-0.174425	2.54863e-08	0.136656	8.64257e-08	0.0255546	0.526408	0.615079	0.270849	0.00141662	3.1511e-08	0.384218
D-dichotoma_M_contig169.4701.1	OG0000052	6.48535	7.25717	5.80653	0	0	0	7.99913	7.54087	7.08611	7.68523	7.15635	7.64676	9.70418	9.14194	8.6229	9.22591	8.78654	9.09495	8.81088	9.12217	9.75415	9.95531	8.5993	8.78953	9.25516	8.9215	9.64582	turquoise	-0.885633	0.614631	0.971577	-0.0881283	0.242495	-0.315327	0.110207	0.567442	0.694381	0.14382	8.29905e-10	0.00064697	3.68352e-17	0.66203	0.222954	0.109126	0.584222	0.00202274	5.86831e-05	0.474188
D-dichotoma_M_contig169.4705.1	OG0010018	5.84245	5.42373	4.72082	0	4.45286	0	4.03141	5.32171	5.0056	5.7541	4.40844	6.59564	7.92582	6.52103	7.55731	7.40582	7.52528	7.28382	7.30734	7.14482	6.35916	6.96383	7.45012	6.8719	7.42409	7.0402	6.90043	turquoise	-0.866845	0.42976	0.840419	-0.254007	0.00859942	-0.143575	0.2281	0.247348	0.743249	0.0806712	4.99849e-09	0.0252675	4.13406e-08	0.201075	0.966044	0.474949	0.25249	0.213544	8.93623e-06	0.689158
D-dichotoma_M_contig169.4709.1	OG0010019	0	0	2.38634	0	0	0	0	3.42606	2.62933	0	0	0	1.85778	2.51746	2.18963	3.39196	2.33814	2.66204	3.52929	3.43897	2.97425	2.24179	2.92108	2.05547	2.55867	2.57468	3.3119	NA	NA	NA	NA	NA	NA	NA	NA	NA	NA	NA	NA	NA	NA	NA	NA	NA	NA	NA	NA	NA
D-dichotoma_M_contig170.4782.1	OG0010020	0	0	0	0	0	0	0	0	0	2.17994	0	0	0	0	0	0	0	0	0	0	0	0	0	0	0	0	0	NA	NA	NA	NA	NA	NA	NA	NA	NA	NA	NA	NA	NA	NA	NA	NA	NA	NA	NA	NA	NA
D-dichotoma_M_contig324.11177.1	OG0010021	0	0	0	0	4.45286	0	0	0	0	0	0	0	0.308699	3.58817	1.72911	2.10016	2.68003	0.880852	2.88112	3.17872	2.44304	1.85235	2.62996	3.18863	2.95515	2.34915	2.14231	NA	NA	NA	NA	NA	NA	NA	NA	NA	NA	NA	NA	NA	NA	NA	NA	NA	NA	NA	NA	NA
D-dichotoma_M_contig326.11215.1	OG0010022	6.25119	7.04455	6.89957	0	0	0	7.7128	6.00821	6.71078	7.84886	8.20174	7.39659	7.10051	6.3365	7.69759	6.77224	7.2263	5.45663	6.67637	6.61301	6.20201	5.31435	7.40371	6.0578	5.72005	6.40675	5.98305	turquoise	-0.684906	0.869986	0.903337	0.360702	0.430107	-0.524139	0.012727	0.452272	0.307555	0.301944	8.10936e-05	3.77523e-09	1.11929e-10	0.0645503	0.0251369	0.00501144	0.949763	0.0178572	0.118622	0.125847
D-dichotoma_M_contig326.11220.1	OG0010023	5.45797	6.65207	6.00954	8.31198	9.24579	7.88751	6.87868	5.8946	6.78051	6.91965	7.59426	6.8159	6.39282	6.01786	6.23391	6.95112	6.80287	6.28788	6.35024	6.49985	6.86774	6.00915	6.53974	6.048	5.94944	6.51951	6.36044	turquoise	0.662079	-0.632851	-0.827007	-0.081963	-0.106039	0.575073	0.0702245	-0.63691	-0.420057	0.250531	0.000168785	0.000396387	1.04974e-07	0.684431	0.598604	0.00170167	0.727794	0.0003539	0.0291504	0.20752
D-dichotoma_M_contig1001.109.1	OG0010024	0	0	0	0	0	0	0	0	0	0	0	0	1.41691	0.838041	0.439558	0.242014	0	0	0	0	0	0	2.09999	0.927471	1.11415	0.281597	0	NA	NA	NA	NA	NA	NA	NA	NA	NA	NA	NA	NA	NA	NA	NA	NA	NA	NA	NA	NA	NA
D-dichotoma_M_contig1005.135.1	OG0010025	1.88155	2.64168	4.93537	2.73491	0	0	3.73137	5.13421	5.98297	5.55175	3.47482	4.63971	5.8995	5.24862	5.78505	5.86213	6.1697	6.23514	6.10123	6.16851	6.78571	6.92006	6.05676	5.64184	5.59353	6.15077	6.77455	turquoise	-0.777611	0.374957	0.809298	-0.264924	0.149969	-0.116184	0.156219	0.594951	0.726227	0.130806	1.81867e-06	0.0539654	3.20418e-07	0.181728	0.455291	0.563871	0.436497	0.00106311	1.79979e-05	0.515479
D-dichotoma_M_contig1187.1491.1	OG0010026	2.67116	0	0	2.73491	0	0	4.27966	0	2.62933	3.9189	3.47482	0	2.11778	1.74969	1.38009	1.49898	1.70204	3.2349	2.99352	3.14263	1.38613	1.69506	1.53756	1.23445	1.11415	0.517103	0.838351	NA	NA	NA	NA	NA	NA	NA	NA	NA	NA	NA	NA	NA	NA	NA	NA	NA	NA	NA	NA	NA
D-dichotoma_M_contig1190.1540.1	OG0010027	3.85035	5.01986	6.00954	6.97106	6.98185	6.71082	4.4914	5.8946	7.14016	7.47223	8.29764	8.58441	5.22899	4.84946	6.83628	5.00222	6.6909	5.07968	7.55793	7.82221	5.98944	5.55081	7.1913	5.33842	3.81192	5.27498	6.65555	grey	0.271491	-0.11707	-0.250177	0.114437	0.036822	0.330599	0.00633258	-0.172127	-0.215128	0.575583	0.170734	0.56088	0.208184	0.569785	0.855316	0.0921251	0.974992	0.390612	0.281201	0.00168188
D-dichotoma_M_contig1190.1541.1	OG0000218	5.97151	3.52119	5.28743	5.69807	6.98185	6.42437	5.96367	6.11352	6.71078	7.38348	8.25048	8.32213	5.52649	4.86254	6.79985	5.1431	6.95998	5.39064	7.91149	7.85325	6.26392	5.83156	7.4401	5.58875	4.4417	5.42728	7.08759	grey	0.133136	0.00411268	-0.0747168	0.110504	0.0332367	0.276121	0.00290303	-0.138762	-0.0744885	0.609431	0.507959	0.983757	0.711094	0.583202	0.869278	0.163271	0.988534	0.49003	0.71194	0.00074002
D-dichotoma_M_contig216.7158.1	OG0010028	0	0	0	4.56247	0	0	2.02518	0	0	3.01127	0	0	0.778857	0.838041	1.8046	0.630339	0	1.2645	0	0	0.488969	0	0.230207	2.51984	2.37652	0.517103	0.336476	NA	NA	NA	NA	NA	NA	NA	NA	NA	NA	NA	NA	NA	NA	NA	NA	NA	NA	NA	NA	NA
D-dichotoma_M_contig217.7188.1	OG0010029	0	0	0	0	0	0	0	0	0	0	0	0	0	2.44974	1.04863	1.49898	1.36599	1.56726	1.84265	1.48027	0	0	2.21197	1.59901	1.8328	0	0	NA	NA	NA	NA	NA	NA	NA	NA	NA	NA	NA	NA	NA	NA	NA	NA	NA	NA	NA	NA	NA
D-dichotoma_M_contig217.7191.1	OG0010030	7.0504	7.20688	7.3742	9.37262	10.7613	9.30592	7.24271	7.10307	7.70388	7.5285	8.25048	7.85989	8.01501	6.94961	8.00118	8.46258	7.48047	6.90263	7.37289	7.55674	6.36624	6.35645	7.40813	7.28455	6.59598	7.11613	6.91306	turquoise	0.674202	-0.634282	-0.832666	-0.0862306	-0.332525	0.553504	0.144867	-0.636576	-0.433866	0.103777	0.000115254	0.000380928	7.15534e-08	0.668896	0.0901316	0.00274476	0.470942	0.00035724	0.0237562	0.606469
D-dichotoma_M_contig218.7233.1	OG0010031	0	0	0	0	0	0	0	0	0	0	0	0	0	0	0	0	0	0	0	0	0	0	0	0	0	0	0	NA	NA	NA	NA	NA	NA	NA	NA	NA	NA	NA	NA	NA	NA	NA	NA	NA	NA	NA	NA	NA
D-dichotoma_M_contig218.7236.1	OG0010032	4.6532	5.23588	3.24132	2.73491	0	0	5.55632	3.96558	2.62933	4.47172	3.47482	4.0834	3.11018	3.192	4.27379	2.84997	3.53506	2.12626	3.64854	3.14263	2.07981	0.457315	2.95366	2.87058	3.33406	2.67547	3.87369	blue	-0.181369	0.720764	0.5002	0.55619	0.317204	-0.539435	-0.0319439	0.32256	-0.0851419	0.135283	0.36527	2.22918e-05	0.00788384	0.00259062	0.106919	0.003687	0.874322	0.100805	0.672847	0.501081
D-dichotoma_M_contig218.7239.1	OG0010033	2.67116	4.45696	2.38634	5.53161	4.45286	3.38293	2.02518	0	0	3.53532	3.47482	0	1.94975	3.84695	1.94467	2.56836	1.79866	3.19127	2.62606	3.40889	2.54629	2.80069	3.1632	3.71986	3.15701	2.76968	3.68033	blue	0.296309	-0.535467	-0.402788	-0.376083	-0.374776	0.467148	0.227374	-0.158503	0.0814773	-0.0488907	0.133421	0.00399797	0.0372436	0.0531905	0.0540902	0.0140213	0.254044	0.429735	0.686207	0.808651
D-dichotoma_M_contig218.7242.1	OG0010034	7.02088	4.76569	6.10125	0	4.45286	0	7.66994	5.13421	5.22156	6.48033	5.94738	5.35334	8.83964	8.60181	7.88098	7.48296	7.8994	9.97319	7.73005	7.12876	10.2947	9.90456	6.82153	9.92036	10.6179	9.25192	7.94138	turquoise	-0.84019	0.378846	0.80989	-0.292523	0.040404	-0.155882	0.160426	0.30056	0.761412	0.0245572	4.20359e-08	0.0513275	3.09269e-07	0.138692	0.841408	0.437498	0.424087	0.127677	3.97986e-06	0.903229
D-dichotoma_M_contig3774.12563.1	OG0010035	5.77332	5.23588	2.38634	0	0	0	4.03141	2.5544	0	2.17994	0	0	3.95922	1.63242	1.56513	0.449203	2.46133	3.79727	0.483315	1.59157	4.40409	3.36801	1.02717	0.927471	0.949901	0.719506	2.58273	grey	-0.340856	0.4242	0.384003	0.20345	0.260541	-0.611743	-0.439232	0.174572	0.0249192	-0.436695	0.0818821	0.0274375	0.0479874	0.308759	0.189333	0.000697313	0.0218925	0.38381	0.90181	0.0227583
D-dichotoma_M_contig3781.12580.1	OG0010036	4.49042	6.49329	5.28743	0	0	0	4.27966	5.32171	5.22156	4.68479	5.37406	5.35334	6.11843	5.13464	4.38864	6.0686	6.24879	5.75521	5.76356	5.77348	6.94536	6.17472	6.05676	5.28101	6.15205	6.20235	6.28955	turquoise	-0.837169	0.692725	0.953136	0.0411832	0.394076	-0.463603	0.00476383	0.525999	0.546086	0.0777078	5.22107e-08	6.21488e-05	1.72784e-14	0.838389	0.0419586	0.0148669	0.981186	0.00483146	0.00321195	0.700046
D-dichotoma_M_contig3782.12582.1	OG0010037	3.17858	0	2.38634	5.84729	7.20261	5.58975	3.35209	2.5544	0	6.23186	5.37406	5.61048	0	0.838041	0.617565	0.449203	2.46133	0	1.67299	1.35967	0	0	0.75874	0	0	0	1.20998	turquoise	0.731237	-0.272388	-0.719037	0.358105	0.0216803	0.277723	-0.0398209	-0.547535	-0.67301	0.402692	1.47252e-05	0.169271	2.38274e-05	0.0666413	0.914523	0.160744	0.843669	0.00311569	0.000119754	0.0372935
D-dichotoma_M_contig3786.12594.1	OG0010038	0	0	0	10.4378	9.59675	9.92554	3.35209	0	2.62933	0	0	0	0	0.336329	0.236455	0	0	0	0.261803	0	0	0	0.428685	2.51984	0	2.90037	4.31558	green	0.8545	-0.789616	-0.912329	-0.221619	-0.283032	0.524468	0.116438	-0.450281	-0.384556	-0.1341	1.41183e-08	9.75231e-07	3.4717e-11	0.266585	0.152565	0.00497917	0.563011	0.0184304	0.0476394	0.504867
D-dichotoma_M_contig72.18099.1	OG0010039	5.5435	7.10071	6.18747	6.83471	8.91199	7.49351	5.96367	6.11352	6.39229	8.77771	9.09637	8.95279	8.5892	7.53783	7.7197	7.41973	8.02204	8.02642	7.91863	8.01298	9.90504	9.56848	8.62608	7.93516	7.71225	8.53977	9.78762	grey	-0.238372	-0.252532	0.0977787	-0.448996	0.0278793	0.494886	0.370404	-0.0654583	0.460955	0.518104	0.231166	0.203792	0.627537	0.0188085	0.890212	0.00868108	0.0571865	0.745647	0.0155258	0.00563492
D-dichotoma_M_contig72.18100.1	OG0000702	6.72388	8.03908	7.54724	8.7323	9.97183	9.12279	7.75442	7.87629	8.90159	10.609	11.484	11.2724	10.2622	8.28591	9.67895	9.26026	9.88492	9.29887	9.03482	9.51039	11.8445	10.8772	10.0332	9.15684	8.61593	10.0934	11.4251	grey	-0.165264	-0.169749	0.0765158	-0.290049	0.184648	0.445567	0.323799	-0.0197141	0.322173	0.641483	0.41006	0.397289	0.704442	0.142216	0.356517	0.0198481	0.0994289	0.92225	0.101238	0.000310864
D-dichotoma_M_contig73.18175.1	OG0010040	8.26236	8.45992	7.04524	5.34342	5.41954	3.38293	9.53924	8.14825	8.05288	9.80483	7.73794	8.21002	2.11778	4.35247	3.84369	2.69583	1.08869	2.03046	3.64854	3.3147	3.83931	2.45307	3.37047	4.33387	4.2252	4.31958	3.70959	brown	0.440903	0.551712	-0.119458	0.930188	0.484523	-0.578038	-0.356859	-0.292495	-0.777431	0.193621	0.0213373	0.00285192	0.552858	2.22193e-12	0.0104309	0.00158935	0.0676629	0.138732	1.83519e-06	0.333205
D-dichotoma_M_contig73.18176.1	OG0010041	0	0	0	2.73491	0	0	0	0	0	0	0	0	0	0	0	0	0	0	0	0	0	0	0	0	0	0	0	NA	NA	NA	NA	NA	NA	NA	NA	NA	NA	NA	NA	NA	NA	NA	NA	NA	NA	NA	NA	NA
D-dichotoma_M_contig73.18178.1	OG0010042	1.88155	0	0	0	4.45286	0	2.02518	0	0	0	0	0	0.966698	0.838041	0.236455	0	0	0.356693	0.6753	0.29131	0	0	0	0.293353	0.949901	0	0	NA	NA	NA	NA	NA	NA	NA	NA	NA	NA	NA	NA	NA	NA	NA	NA	NA	NA	NA	NA	NA
D-dichotoma_M_contig1105.925.1	OG0010043	5.16596	5.73892	5.5702	2.73491	0	0	5.24204	4.35734	5.85951	4.47172	5.94738	5.04021	5.62743	5.73459	4.95046	6.52859	6.23159	6.37821	5.61919	5.78523	7.80021	7.72612	5.15383	5.93556	6.37492	6.62094	6.69632	turquoise	-0.801015	0.592671	0.893196	-0.0370251	0.409056	-0.388602	-0.0232354	0.597542	0.5737	0.0529802	5.19544e-07	0.00112377	3.68094e-10	0.854526	0.0341212	0.0451552	0.908416	0.000997633	0.00175595	0.792974
D-dichotoma_M_contig1109.938.1	OG0010044	0	0	0	4.16764	0	3.38293	2.8361	2.5544	0	0	3.47482	3.16609	2.69768	2.05328	2.44688	1.4026	1.36599	1.42381	2.47935	2.39267	1.77427	0.457315	2.15706	0.927471	2.43983	0.719506	1.6329	NA	NA	NA	NA	NA	NA	NA	NA	NA	NA	NA	NA	NA	NA	NA	NA	NA	NA	NA	NA	NA
D-dichotoma_M_contig4990.15242.1	OG0010045	6.68677	6.92521	6.34585	0	0	0	7.45955	6.11352	6.47874	7.78099	7.15635	7.09375	5.06386	4.4248	5.07764	4.13918	4.57056	5.51088	5.59563	5.65034	4.37633	4.42721	4.32412	4.88931	5.07086	4.00789	3.01651	blue	-0.475155	0.960429	0.72813	0.670018	0.460297	-0.710588	-0.30785	0.289496	-0.0531231	0.249325	0.012257	2.16999e-15	1.66856e-05	0.000131728	0.0156931	3.2784e-05	0.118251	0.143013	0.792427	0.209788
D-dichotoma_M_contig4994.15243.1	OG0010046	0	0	0	0	0	0	0	0	0	0	0	0	0	0	0	0.242014	0	0	0	0.29131	0	0	0.230207	0	0	0	0.609128	NA	NA	NA	NA	NA	NA	NA	NA	NA	NA	NA	NA	NA	NA	NA	NA	NA	NA	NA	NA	NA
D-dichotoma_M_contig4994.15244.1	OG0010047	1.88155	0	0	2.73491	0	0	2.02518	0	0	2.17994	0	0	3.98118	5.01088	4.02823	4.45969	3.50673	4.38644	4.49118	4.62747	2.44304	4.26875	3.78683	4.39699	4.18881	4.41012	3.42206	NA	NA	NA	NA	NA	NA	NA	NA	NA	NA	NA	NA	NA	NA	NA	NA	NA	NA	NA	NA	NA
D-dichotoma_M_contig4998.15245.1	OG0010048	0	0	0	0	0	0	0	0	0	0	0	0	0.308699	0.608885	0.776001	0.242014	1.36599	0.356693	1.13347	0.29131	0	0.457315	0.428685	1.48742	0.551757	0.281597	0	NA	NA	NA	NA	NA	NA	NA	NA	NA	NA	NA	NA	NA	NA	NA	NA	NA	NA	NA	NA	NA
D-dichotoma_M_contig5020.15360.1	OG0010049	0	0	0	0	0	0	0	0	0	0	0	0	1.13287	2.37869	0.236455	0.449203	1.36599	0	0	0	0	0.457315	0.899188	0	0.302097	0.896975	0.336476	NA	NA	NA	NA	NA	NA	NA	NA	NA	NA	NA	NA	NA	NA	NA	NA	NA	NA	NA	NA	NA
D-dichotoma_M_contig5020.15366.1	OG0010050	1.88155	0	0	0	0	0	2.8361	0	0	0	0	0	1.75954	0.336329	1.8046	0.449203	1.08869	2.95079	2.80101	1.88167	2.44304	1.51849	1.77486	3.35683	2.81891	1.92676	2.14231	NA	NA	NA	NA	NA	NA	NA	NA	NA	NA	NA	NA	NA	NA	NA	NA	NA	NA	NA	NA	NA
D-dichotoma_M_contig5027.15368.1	OG0010051	6.60954	5.42373	4.46868	0	0	0	7.53314	5.32171	6.2021	6.48033	4.97057	5.04021	6.21427	7.65897	4.95875	6.46141	4.58417	7.25497	6.22151	5.84261	5.59104	6.17472	5.99157	7.19192	7.07366	5.9186	5.38245	turquoise	-0.760154	0.732094	0.917103	0.134932	0.214132	-0.457019	0.00607969	0.500285	0.50572	0.101799	4.2186e-06	1.42221e-05	1.7703e-11	0.502202	0.283488	0.0165492	0.97599	0.00787162	0.00712178	0.613383
D-dichotoma_M_contig5027.15369.1	OG0010052	6.72388	6.92521	5.80653	0	0	0	7.85351	6.82155	6.56031	7.22223	6.16643	6.33559	7.56595	8.51336	6.58114	6.80325	6.27841	8.41579	7.21568	7.03342	6.98265	7.24848	6.97027	8.05008	8.11267	6.98726	5.90298	turquoise	-0.828356	0.756231	0.962177	0.124086	0.221447	-0.47403	0.000453564	0.524408	0.528455	0.109167	9.59277e-08	5.04813e-06	1.24513e-15	0.537465	0.266966	0.0124931	0.998209	0.00498502	0.00460225	0.587798
D-dichotoma_M_contig1951.6019.1	OG0010053	2.67116	0	0	6.42387	0	0	4.03141	0	0	3.9189	0	0	2.46812	2.91906	2.85465	2.84997	0.927098	2.52814	2.99352	2.32985	2.07981	1.51849	2.21197	2.40169	2.31031	1.55574	0.336476	grey	-0.0755455	-0.19742	-0.00450515	-0.260817	-0.391955	0.310994	0.152658	0.313163	0.28634	0.0302835	0.708027	0.323621	0.982207	0.188848	0.0431752	0.114347	0.447152	0.111711	0.147621	0.880807
D-dichotoma_M_contig1953.6024.1	OG0010054	4.79946	3.52119	4.72082	0	0	0	4.67601	0	4.44292	2.17994	0	5.04021	6.3343	7.58593	7.73546	7.12164	7.86075	7.45963	6.50047	6.51405	6.63575	6.76543	5.9837	6.91836	7.54598	6.94246	6.08146	turquoise	-0.817457	0.223006	0.755427	-0.454425	-0.0921758	-0.0254483	0.237973	0.51044	0.833955	-0.130952	1.94475e-07	0.263526	5.235e-06	0.0172539	0.647476	0.899735	0.23197	0.00652023	6.54446e-08	0.515008
D-dichotoma_M_contig1953.6026.1	OG0010055	0	0	0	0	0	0	0	0	0	0	0	0	0	0	0	0	0	0	0	0	0	0	0	0	0.302097	0	0	NA	NA	NA	NA	NA	NA	NA	NA	NA	NA	NA	NA	NA	NA	NA	NA	NA	NA	NA	NA	NA
D-dichotoma_M_contig1953.6030.1	OG0010056	4.79946	4.45696	3.24132	0	0	0	4.4914	4.91865	4.44292	5.03484	5.68902	4.0834	1.65412	2.30396	1.27784	2.03736	2.05487	1.56726	0.261803	0	0	1.85235	1.53756	2.20406	2.77048	2.40893	1.20998	blue	-0.014825	0.80806	0.326821	0.861209	0.61587	-0.697357	-0.162737	0.0223434	-0.451491	0.267494	0.941495	3.44919e-07	0.0961309	8.12886e-09	0.000626359	5.28799e-05	0.417353	0.911918	0.0180804	0.177368
D-dichotoma_M_contig1955.6033.1	OG0010057	0	0	0	0	0	0	0	0	0	0	0	0	0	0	0.236455	0.242014	0	0	0	0	0	0	0.75874	0.927471	0.302097	0	0	NA	NA	NA	NA	NA	NA	NA	NA	NA	NA	NA	NA	NA	NA	NA	NA	NA	NA	NA	NA	NA
D-dichotoma_M_contig1956.6036.1	OG0010058	2.67116	0	0	0	0	0	0	0	0	2.17994	0	0	1.28187	2.51746	0.439558	1.29933	2.13107	1.08539	1.58003	1.48027	0	2.63733	0	1.59901	2.16801	1.32698	0.336476	NA	NA	NA	NA	NA	NA	NA	NA	NA	NA	NA	NA	NA	NA	NA	NA	NA	NA	NA	NA	NA
D-dichotoma_M_contig1957.6038.1	OG0010059	5.90842	6.49329	6.41897	0	0	0	7.24271	7.68453	7.42781	7.55583	6.93564	8.08846	4.64948	5.63901	7.07794	5.68396	5.51165	4.44335	7.25943	6.03703	6.06093	5.15735	4.7336	4.21629	4.03331	4.00789	4.15468	blue	-0.531822	0.9223	0.753993	0.581127	0.515134	-0.661143	-0.303634	0.323745	0.0209806	0.255641	0.00430307	8.1093e-12	5.584e-06	0.0014792	0.00596518	0.000173705	0.123638	0.0994891	0.917272	0.198093
D-dichotoma_M_contig1958.6039.1	OG0010060	1.88155	0	0	8.80709	8.71081	7.33398	2.02518	0	0	0	0	0	0	0.608885	0	0.449203	0	0.880852	0.844711	0.533566	0	0	0.428685	0.745413	0.302097	0.719506	2.37926	turquoise	0.812433	-0.818922	-0.947495	-0.237085	-0.388524	0.543536	0.0400765	-0.519314	-0.397372	-0.17455	2.65229e-07	1.77329e-07	6.93785e-14	0.233769	0.0452021	0.00338748	0.842678	0.00550487	0.0401221	0.383872
D-dichotoma_M_contig241.8251.1	OG0010061	0	0	0	0	0	0	0	0	0	0	0	0	0	0	0	0	0	0	0	0	0	0	0	0.745413	0	0	0	NA	NA	NA	NA	NA	NA	NA	NA	NA	NA	NA	NA	NA	NA	NA	NA	NA	NA	NA	NA	NA
D-dichotoma_M_contig241.8252.1	OG0010062	0	0	0	0	0	0	2.02518	0	4.44292	5.03484	0	5.35334	4.59355	2.81525	2.44688	3.26066	1.48692	1.69773	2.06475	1.35967	0	1.99417	4.36102	6.08681	5.59353	4.53609	3.97356	grey	-0.318931	0.166545	0.434984	-0.167654	-0.0704881	0.166637	0.629105	0.272107	0.500999	0.385393	0.104919	0.406387	0.0233577	0.403225	0.726811	0.406126	0.000439494	0.169728	0.00776954	0.0471166
D-dichotoma_M_contig241.8253.1	OG0010063	11.2567	10.6714	10.4905	3.62227	5.41954	0	11.1426	10.2464	10.3873	10.8125	9.69814	9.80465	8.63408	9.77918	9.09032	8.8322	9.21305	9.58046	9.64078	9.07267	9.36151	9.51285	9.59776	9.52549	9.52703	9.24527	9.05132	blue	-0.623471	0.902655	0.839233	0.440268	0.44513	-0.687171	-0.179779	0.205869	0.196113	0.092937	0.000512039	1.21742e-10	4.50452e-08	0.0215469	0.0199841	7.51407e-05	0.36956	0.302917	0.326899	0.644753
D-dichotoma_M_contig242.8292.1	OG0010064	4.93224	6.31485	4.46868	0	0	0	4.83965	5.32171	6.30033	8.84573	8.55215	8.35764	4.12621	7.0841	7.46871	6.34306	7.39226	5.1383	7.21761	6.6963	6.13734	4.47639	8.26878	6.55996	7.10573	6.53971	6.43241	turquoise	-0.640641	0.711702	0.828168	0.215616	0.326156	-0.276744	0.2227	0.435277	0.404784	0.505475	0.000318424	3.14537e-05	9.71418e-08	0.280086	0.0968498	0.162285	0.264199	0.023254	0.0362256	0.00715424
D-dichotoma_M_contig243.8321.1	OG0010065	4.49042	4.45696	3.24132	0	0	0	0	2.5544	4.04982	3.53532	3.47482	4.0834	5.86448	4.95092	5.61198	5.70936	6.01239	5.12677	5.57771	5.59799	5.41124	5.30076	5.29402	4.55756	4.9125	5.32238	5.25923	turquoise	-0.864919	0.374644	0.837781	-0.309088	0.0615517	-0.131925	0.200035	0.526845	0.748173	0.0396981	5.91645e-09	0.0541817	4.99839e-08	0.116703	0.760376	0.511861	0.317124	0.00475144	7.22466e-06	0.844145
D-dichotoma_M_contig2771.9549.1	OG0000016	0	0	0	0	0	0	0	0	0	0	0	0	0	0	0	0	0	0	0	0	0	0	0	0	0	0	0	NA	NA	NA	NA	NA	NA	NA	NA	NA	NA	NA	NA	NA	NA	NA	NA	NA	NA	NA	NA	NA
D-dichotoma_M_contig2771.9550.1	OG0000003	7.26705	5.87397	5.5702	0	0	0	7.0219	5.48762	4.75152	5.65647	5.68902	5.04021	0	0	0	0	0	0.880852	0.6753	0.922202	0	0	0	0	0	0	0	brown	0.2267	0.729203	0.086941	0.980855	0.567239	-0.753928	-0.527278	-0.130335	-0.722111	0.0997994	0.255493	1.59838e-05	0.666323	2.77136e-19	0.00203194	5.60034e-06	0.00471094	0.517005	2.11561e-05	0.620406
D-dichotoma_M_contig2773.9555.1	OG0010066	0	0	0	0	0	0	0	0	0	0	0	0	0	0	0	0	0	0	0.261803	0	0	0	0	0	0.302097	0	0	NA	NA	NA	NA	NA	NA	NA	NA	NA	NA	NA	NA	NA	NA	NA	NA	NA	NA	NA	NA	NA
D-dichotoma_M_contig2774.9557.1	OG0010067	3.55322	2.64168	4.16295	0	0	0	3.73137	2.5544	0	3.9189	0	3.16609	0	0	0.617565	0.242014	0	0	0.6753	0	0	0	4.22082	0.537017	1.2616	0	0	NA	NA	NA	NA	NA	NA	NA	NA	NA	NA	NA	NA	NA	NA	NA	NA	NA	NA	NA	NA	NA
D-dichotoma_M_contig2776.9561.1	OG0010068	4.6532	4.45696	3.77451	5.98251	5.99322	6.5747	5.81423	2.5544	2.62933	3.53532	3.47482	5.04021	1.41691	1.20958	1.56513	0.935998	2.33814	0.642448	2.06475	2.04702	1.38613	0.457315	2.54698	2.13168	1.39536	2.52152	4.71239	green	0.902345	-0.240812	-0.730003	0.405622	0.119395	0.0436276	-0.104637	-0.463253	-0.759921	0.0260024	1.26464e-10	0.226282	1.54778e-05	0.0358048	0.553071	0.828932	0.603475	0.0149527	4.26425e-06	0.897563
D-dichotoma_M_contig2776.9562.1	OG0010069	9.14841	9.00724	8.35129	7.63663	7.56301	7.63713	9.81971	8.26715	8.33369	9.26551	8.09901	8.49155	3.55294	5.40876	5.23601	3.68614	5.60144	3.27726	6.00617	4.97408	4.65572	3.41921	6.16855	4.77514	4.73459	3.58406	5.16731	brown	0.621379	0.315354	-0.376453	0.845938	0.338305	-0.426493	-0.374664	-0.357677	-0.889992	0.0946434	0.000541517	0.109093	0.0529384	2.74797e-08	0.0843452	0.026525	0.054168	0.0669905	5.2317e-10	0.638664
D-dichotoma_M_contig1697.4745.1	OG0010070	5.36704	4.76569	5.9116	4.87213	0	4.87262	5.73328	6.21167	5.57551	4.87041	4.40844	0	7.53288	7.55807	7.35089	7.41202	7.59083	6.87876	7.52402	7.29009	5.09095	5.76386	7.61707	7.40269	7.15372	6.95254	5.55358	turquoise	-0.576078	0.126497	0.575967	-0.396834	-0.252749	-0.05294	0.195067	0.730087	0.660289	-0.279028	0.00166285	0.529525	0.00166711	0.0404172	0.203391	0.793128	0.329537	1.54255e-05	0.000178308	0.158705
D-dichotoma_M_contig1697.4748.1	OG0010071	0	0	0	5.84729	5.99322	6.42437	0	0	0	0	0	0	0	0	0	0	0	0	0	0	0	0	0.230207	0.293353	0	0	0	turquoise	0.789867	-0.846695	-0.97796	-0.240708	-0.405188	0.57232	0.0503848	-0.502012	-0.427857	-0.137192	9.62234e-07	2.59506e-08	1.58634e-18	0.226489	0.036022	0.00181202	0.802915	0.00762651	0.025994	0.495002
D-dichotoma_M_contig1698.4749.1	OG0000703	5.05383	5.73892	5.5702	9.91943	10.4526	10.0203	3.73137	6.00821	5.85951	7.58266	8.69987	7.64676	7.6403	5.78354	6.64158	7.02177	6.84873	6.51724	6.57463	7.13567	6.87768	6.24735	7.10328	6.44891	5.83636	6.56948	6.87805	turquoise	0.526559	-0.758798	-0.748338	-0.32272	-0.338292	0.744207	0.269134	-0.412088	-0.196129	0.308569	0.00477836	4.49032e-06	7.17282e-06	0.100626	0.0843577	8.57738e-06	0.174625	0.0326878	0.326861	0.11735
D-dichotoma_M_contig1698.4751.1	OG0010072	4.93224	5.99745	6.18747	9.29679	10.3865	9.44907	4.67601	6.21167	6.56031	7.58266	8.25048	8.24836	8.74814	7.13079	7.33187	7.98638	8.16142	7.49819	7.37289	7.93467	8.27441	7.72358	7.90118	7.5436	7.04085	8.13325	8.42204	blue	0.246308	-0.7882	-0.518505	-0.604485	-0.341021	0.842281	0.437736	-0.294277	0.173759	0.304347	0.215538	1.05176e-06	0.00559155	0.000839126	0.0817249	3.60814e-08	0.0223999	0.136231	0.386064	0.122714
D-dichotoma_M_contig1700.4785.1	OG0010073	9.2151	9.17358	9.6288	7.55218	7.97613	6.06659	9.12881	9.8025	9.30803	8.64401	8.38756	9.16812	8.67592	7.82852	8.54249	7.86843	8.60139	8.77201	8.44383	8.32224	8.06868	8.30796	7.7815	8.26625	9.12097	8.82332	7.97491	blue	-0.310793	0.789569	0.515174	0.599647	0.396414	-0.780234	-0.362143	-0.019442	-0.177961	-0.128424	0.114594	9.77725e-07	0.00596053	0.00094703	0.040649	1.59238e-06	0.0634125	0.92332	0.3745	0.523223
D-dichotoma_M_contig1701.4792.1	OG0010074	3.55322	0	3.77451	0	0	0	6.58771	3.42606	3.50777	6.6421	4.40844	6.47146	6.96931	7.22747	6.94871	6.69042	6.49575	7.07159	6.84066	6.72405	6.13734	6.2115	6.78579	7.08337	6.89601	5.91345	6.44552	turquoise	-0.789691	0.375701	0.810736	-0.256697	-0.021334	0.0397563	0.325545	0.517959	0.782509	0.344601	9.71344e-07	0.0534525	2.93927e-07	0.196182	0.915883	0.84392	0.0975134	0.00565074	1.41699e-06	0.0783666
D-dichotoma_M_contig1701.4793.1	OG0010075	3.55322	2.64168	3.24132	0	0	0	6.44248	4.35734	5.57551	6.69222	6.16643	6.18557	7.08284	7.78453	6.7766	6.64638	6.04722	6.92944	7.2613	7.10551	5.43834	5.34114	7.04399	7.06405	6.85595	5.82296	6.07586	turquoise	-0.801226	0.524078	0.877152	-0.110442	0.038415	-0.0785438	0.275215	0.529302	0.706234	0.388563	5.13331e-07	0.00501736	1.93511e-09	0.583418	0.849125	0.696968	0.164713	0.00452536	3.84787e-05	0.0451787
D-dichotoma_M_contig1702.4795.1	OG0010076	0	0	0	0	0	0	0	0	0	0	0	0	0	0	0	0	0	0	0.261803	0.29131	0	0	0.428685	0	0	0	0	NA	NA	NA	NA	NA	NA	NA	NA	NA	NA	NA	NA	NA	NA	NA	NA	NA	NA	NA	NA	NA
D-dichotoma_M_contig1236.1871.1	OG0010077	0	0	0	0	0	0	0	0	0	2.17994	0	0	1.54039	3.49045	0	2.27366	3.66889	4.568	1.84265	2.90473	2.44304	3.92347	3.9572	3.25828	3.63387	2.76968	2.76101	NA	NA	NA	NA	NA	NA	NA	NA	NA	NA	NA	NA	NA	NA	NA	NA	NA	NA	NA	NA	NA
D-dichotoma_M_contig1237.1874.1	OG0010078	0	0	0	0	0	0	0	0	0	0	0	0	0	0	0	0	0	0	0	0	0	0	0	0	0	0	0	NA	NA	NA	NA	NA	NA	NA	NA	NA	NA	NA	NA	NA	NA	NA	NA	NA	NA	NA	NA	NA
D-dichotoma_M_contig1237.1875.1	OG0010079	2.67116	0	0	0	0	0	2.02518	0	4.44292	4.47172	3.47482	3.16609	0	2.81525	1.38009	2.16034	1.88922	2.7246	2.25718	1.59157	1.38613	1.31727	2.26486	2.40169	2.24091	1.65782	1.85865	NA	NA	NA	NA	NA	NA	NA	NA	NA	NA	NA	NA	NA	NA	NA	NA	NA	NA	NA	NA	NA
D-dichotoma_M_contig1237.1877.1	OG0010080	0	0	0	0	0	0	0	0	0	0	0	0	0	0.336329	1.87634	0.449203	0	1.08539	0.996303	1.48027	0	0.804027	0.603131	0	3.33406	0	0	NA	NA	NA	NA	NA	NA	NA	NA	NA	NA	NA	NA	NA	NA	NA	NA	NA	NA	NA	NA	NA
D-dichotoma_M_contig1237.1878.1	OG0010081	3.85035	0	2.38634	0	0	0	4.27966	2.5544	0	4.87041	0	4.0834	2.26827	2.58214	2.7818	1.06754	1.08869	2.89748	2.88112	2.61971	0	0.804027	3.13507	2.57547	3.07962	1.05499	0.609128	NA	NA	NA	NA	NA	NA	NA	NA	NA	NA	NA	NA	NA	NA	NA	NA	NA	NA	NA	NA	NA
D-dichotoma_M_contig1237.1879.1	OG0010082	7.67975	5.01986	5.6932	0	0	0	7.90985	5.77127	6.09669	6.36144	5.37406	6.59564	5.67536	6.26934	5.57473	6.37198	5.8971	6.27749	5.93758	6.08537	5.4517	5.629	5.9518	6.38807	6.02879	5.66646	5.60119	turquoise	-0.707891	0.849373	0.923164	0.304224	0.364756	-0.568787	-0.0676733	0.475775	0.366146	0.137008	3.62156e-05	2.11398e-08	7.08587e-12	0.122873	0.0613891	0.00196262	0.737333	0.0121285	0.0603334	0.495587
D-dichotoma_M_contig1238.1881.1	OG0010083	4.49042	4.45696	5.5702	3.62227	4.45286	0	5.81423	6.00821	6.91062	7.22223	7.80475	8.00132	6.11347	5.30719	6.23391	6.00847	5.56756	5.04333	6.15861	5.82564	5.00293	4.65787	6.58983	5.69932	5.08082	5.80639	4.9516	turquoise	-0.451253	0.668672	0.604382	0.365669	0.309692	-0.247798	0.106414	0.0575986	0.157588	0.562193	0.0181486	0.000137453	0.000841314	0.0606938	0.115953	0.212684	0.597302	0.775364	0.432438	0.00227268
D-dichotoma_M_contig1238.1884.1	OG0010084	3.17858	0	3.77451	0	0	0	3.73137	3.96558	4.44292	5.43883	4.40844	6.01812	3.46216	3.42142	4.30012	4.24024	3.59009	3.19127	4.32925	4.43197	2.33182	0.804027	4.38511	3.53578	2.31031	3.94871	3.19262	turquoise	-0.429395	0.628554	0.643075	0.291873	0.217565	-0.200904	0.153307	0.330056	0.240356	0.517055	0.0254055	0.000446172	0.000297005	0.139611	0.275655	0.314982	0.4452	0.0926924	0.227189	0.00574975
D-dichotoma_M_contig1239.1889.1	OG0010085	5.45797	5.58992	4.46868	3.62227	0	0	6.03296	6.758	4.44292	6.59016	6.67497	6.01812	0	1.03574	1.87634	0	0	0.880852	1.25872	1.22805	0	1.51849	0.603131	0.927471	0.76452	0.896975	0.336476	brown	0.294411	0.641629	0.00812946	0.948403	0.507874	-0.617658	-0.424428	-0.081678	-0.7266	0.242679	0.136045	0.000309573	0.967899	5.60561e-14	0.00684175	0.000597634	0.0273458	0.685472	1.77333e-05	0.222593
D-dichotoma_M_contig1239.1890.1	OG0000704	11.0493	11.831	11.6428	12.3891	10.7786	12.5529	9.91456	11.2801	11.3642	10.1569	11.185	11.8002	12.1787	10.9709	12.2054	11.6432	11.5059	11.379	11.2121	11.5673	11.0626	10.9242	10.9155	11.128	10.9098	10.9677	10.8555	grey	0.137727	-0.379442	-0.300841	-0.223779	-0.305667	0.223209	0.00985936	0.205407	-0.106544	-0.236669	0.493306	0.0509325	0.127303	0.261831	0.121019	0.263081	0.961073	0.304027	0.596852	0.234615
D-dichotoma_M_contig1240.1908.1	OG0010086	1.88155	0	0	6.42387	5.99322	0	3.73137	0	0	5.43883	0	0	5.84664	4.78223	4.44871	4.91757	4.94241	4.568	5.24829	5.44337	4.02952	4.40198	4.4888	5.69932	4.72191	5.18382	4.46032	brown	-0.247428	-0.455386	0.0417183	-0.719603	-0.50793	0.604537	0.445625	0.0152568	0.677719	0.027266	0.213392	0.0169901	0.836317	2.33137e-05	0.00683454	0.00083804	0.01983	0.939793	0.000102844	0.892613
D-dichotoma_M_contig1240.1909.1	OG0010087	0	0	0	0	0	0	0	0	0	0	0	0	0	0	0	0	0	0	0	0	0	0	0	0	0	0	0	NA	NA	NA	NA	NA	NA	NA	NA	NA	NA	NA	NA	NA	NA	NA	NA	NA	NA	NA	NA	NA
D-dichotoma_M_contig457.14437.1	OG0010088	0	0	0	0	0	0	0	0	0	0	0	0	0	0	0.236455	0	0.927098	0.642448	0.261803	0.29131	0	0	0	0.745413	0.76452	0.281597	1.20998	NA	NA	NA	NA	NA	NA	NA	NA	NA	NA	NA	NA	NA	NA	NA	NA	NA	NA	NA	NA	NA
D-dichotoma_M_contig457.14438.1	OG0010089	6.64867	2.64168	0	2.73491	0	0	6.95207	0	0	7.55583	0	3.16609	1.65412	2.05328	1.38009	0.449203	2.62838	0.356693	0.844711	0.29131	0	1.08335	0.603131	1.97501	2.72037	2.08171	0.838351	grey	0.0999085	0.328559	0.0865724	0.415416	0.187938	-0.223333	0.0419625	0.0573751	-0.178106	0.169709	0.620022	0.0942725	0.667658	0.0311708	0.347861	0.262809	0.835372	0.776214	0.374105	0.397402
D-dichotoma_M_contig457.14440.1	OG0010090	1.88155	2.64168	0	0	0	0	0	0	3.50777	2.17994	0	0	1.28187	2.05328	0.439558	0.630339	0.745095	1.56726	2.37253	2.12309	0.853502	0.804027	1.77486	0	0.302097	0.517103	0.609128	NA	NA	NA	NA	NA	NA	NA	NA	NA	NA	NA	NA	NA	NA	NA	NA	NA	NA	NA	NA	NA
D-dichotoma_M_contig458.14458.1	OG0000705	5.84245	6.31485	6.9983	2.73491	5.41954	4.31207	7.43416	7.2944	6.30033	8.2174	8.3433	8.6996	5.85856	6.61677	6.77894	7.22741	6.65263	6.82624	6.85064	6.9653	7.28094	7.06374	6.79705	6.8239	6.71911	6.90143	6.9896	turquoise	-0.533073	0.73699	0.7071	0.364996	0.499504	-0.354937	-0.00857895	0.128031	0.205162	0.537175	0.00419617	1.16309e-05	3.72807e-05	0.0612059	0.00798465	0.0692619	0.966125	0.524504	0.304617	0.00386149
D-dichotoma_M_contig459.14475.1	OG0000706	10.2008	10.4888	10.4989	6.51593	8.47695	7.24708	10.8214	9.43701	10.3477	11.3657	11.7905	11.2955	10.4172	11.1435	9.80206	10.7157	10.7537	11.2534	10.4041	10.5489	11.9244	11.491	10.3388	11.3796	11.749	11.4021	10.6693	turquoise	-0.746865	0.667941	0.847963	0.114874	0.404226	-0.334916	0.0706142	0.291696	0.476577	0.344768	7.64794e-06	0.000140655	2.35615e-08	0.568304	0.036508	0.0877024	0.726341	0.139864	0.0119639	0.0782132
D-dichotoma_M_contig459.14476.1	OG0010091	5.5435	5.01986	6.55494	2.73491	4.45286	0	5.64751	4.91865	4.75152	6.53629	7.25521	7.85989	4.53536	5.49527	4.93375	6.61446	6.62325	6.27226	5.12209	5.59799	7.62258	7.06776	5.26835	6.12459	6.46897	7.02118	6.60973	turquoise	-0.613353	0.591872	0.704305	0.144007	0.509494	-0.28941	0.055379	0.1163	0.359776	0.363803	0.000668842	0.00114574	4.12701e-05	0.473607	0.00663726	0.143137	0.783814	0.563477	0.0652905	0.0621213
D-dichotoma_M_contig459.14478.1	OG0010092	8.47323	7.98041	8.29414	5.34342	6.7211	4.31207	8.25253	7.71831	7.55264	9.13567	9.3854	9.22691	7.14982	7.78453	7.3556	7.23618	7.18891	8.31266	7.52246	7.63677	7.80281	7.40272	7.43	8.22226	8.39415	7.71918	6.81213	blue	-0.464652	0.818638	0.647323	0.535653	0.38619	-0.49953	-0.107214	0.0385082	0.0342895	0.419626	0.0146124	1.80548e-07	0.000262622	0.00398295	0.0466236	0.00798085	0.594532	0.848763	0.865174	0.0293335
D-dichotoma_M_contig4561.14417.1	OG0010093	6.08996	5.58992	5.43573	0	0	0	4.4914	4.35734	4.04982	7.00145	7.34773	7.17562	7.61242	8.6298	8.29012	8.23664	7.78317	8.19746	7.97105	7.74907	7.39944	7.98802	7.4487	8.24924	8.34538	7.95675	7.01619	turquoise	-0.891602	0.519647	0.926697	-0.174483	0.100301	-0.145181	0.253496	0.557245	0.748414	0.256717	4.39057e-10	0.00546957	4.01125e-12	0.384057	0.618643	0.469969	0.202013	0.00253209	7.14889e-06	0.196145
D-dichotoma_M_contig4562.14418.1	OG0010094	0	0	0	0	0	0	0	0	0	0	0	0	0	0	0	1.18808	1.48692	0	0	0	1.59321	0.457315	0	0	0	0.517103	2.37926	NA	NA	NA	NA	NA	NA	NA	NA	NA	NA	NA	NA	NA	NA	NA	NA	NA	NA	NA	NA	NA
D-dichotoma_M_contig4569.14421.1	OG0010095	0	0	0	0	0	0	0	0	0	2.17994	0	0	0	1.85814	0.439558	0.242014	1.88922	0	0.261803	0.740931	1.14426	0.804027	1.14471	1.36647	0	0.517103	0	NA	NA	NA	NA	NA	NA	NA	NA	NA	NA	NA	NA	NA	NA	NA	NA	NA	NA	NA	NA	NA
D-dichotoma_M_contig4574.14444.1	OG0010096	0	0	0	0	0	0	0	0	0	0	0	0	0	0	0	0	0	0	0	0	0	0	0	0	0	0	0	NA	NA	NA	NA	NA	NA	NA	NA	NA	NA	NA	NA	NA	NA	NA	NA	NA	NA	NA	NA	NA
D-dichotoma_M_contig4575.14445.1	OG0010097	1.88155	0	2.38634	0	0	0	2.02518	0	0	2.17994	0	0	0.778857	1.03574	0	0.449203	0	0.642448	0.261803	0	0.488969	0.457315	1.44892	2.40169	2.24091	1.65782	1.0361	NA	NA	NA	NA	NA	NA	NA	NA	NA	NA	NA	NA	NA	NA	NA	NA	NA	NA	NA	NA	NA
D-dichotoma_M_contig4575.14447.1	OG0010098	4.49042	4.06365	4.72082	0	0	0	4.4914	0	4.75152	4.22163	5.37406	0	3.71898	3.31127	4.79255	4.44766	4.91033	2.7246	4.65965	4.29067	2.44304	1.85235	4.12394	3.96869	3.43072	3.29824	3.34956	NA	NA	NA	NA	NA	NA	NA	NA	NA	NA	NA	NA	NA	NA	NA	NA	NA	NA	NA	NA	NA
D-dichotoma_M_contig4581.14464.1	OG0010099	2.67116	2.64168	0	2.73491	0	0	3.35209	0	2.62933	6.29811	0	3.16609	4.92346	5.72746	4.64632	5.8935	5.9972	4.22271	4.99283	4.50487	4.60878	3.73427	5.00632	5.11259	4.42615	5.44166	4.35314	yellow	-0.620828	0.084339	0.578036	-0.449871	-0.106795	0.230571	0.451642	0.498399	0.794778	0.183013	0.000549531	0.675766	0.00158942	0.0185503	0.595985	0.247247	0.0180371	0.00814684	7.36839e-07	0.360866
D-dichotoma_M_contig4589.14469.1	OG0010100	0	0	0	0	0	0	0	0	0	0	0	0	0	0	0	0	0	0	0	0	0	0	0	0	0	0	0	NA	NA	NA	NA	NA	NA	NA	NA	NA	NA	NA	NA	NA	NA	NA	NA	NA	NA	NA	NA	NA
D-dichotoma_M_contig91.19826.1	OG0010101	6.08996	7.30576	5.5702	0	0	0	6.03296	7.2019	3.50777	7.63485	7.15635	7.17562	0	1.36471	0.776001	0	0	0	0	0	0	0	0	0	0	0	0	brown	0.21634	0.712452	0.0792445	0.971637	0.581914	-0.679673	-0.3883	-0.138829	-0.707591	0.245344	0.278434	3.05842e-05	0.694392	3.5881e-17	0.00145219	9.64737e-05	0.0453371	0.489817	3.66164e-05	0.217396
D-dichotoma_M_contig91.19833.1	OG0010102	0	0	0	0	6.7211	0	2.02518	0	2.62933	0	0	3.16609	0	0	0	1.58932	1.70204	0	0	0	3.7556	1.99417	0	0	0	0.896975	2.58273	grey	0.187764	-0.214948	-0.300857	-0.052434	0.271398	0.141221	-0.0817522	-0.692136	-0.143192	0.0589987	0.348315	0.281614	0.127282	0.795063	0.170888	0.482294	0.685201	6.34243e-05	0.476141	0.770046
D-dichotoma_M_contig91.19842.1	OG0010103	3.85035	5.01986	4.46868	8.43499	9.14287	8.88446	2.02518	3.96558	4.44292	4.68479	6.35656	5.04021	7.4067	6.16764	6.98769	7.71636	7.70118	6.44476	6.16663	6.85808	6.97342	6.72022	6.77215	6.62732	6.40299	7.10714	7.14762	blue	0.0983541	-0.85711	-0.426281	-0.814552	-0.481397	0.831568	0.472674	-0.135645	0.365535	0.0211506	0.625503	1.14277e-08	0.0266082	2.32959e-07	0.0110132	7.71601e-08	0.0127826	0.499924	0.0607955	0.916604
D-dichotoma_M_contig92.19925.1	OG0010104	10.7543	10.3566	10.7533	2.73491	0	0	10.4867	10.2636	10.3648	9.80483	9.3854	9.50546	9.01422	9.06058	9.40879	8.89553	9.15606	9.29114	9.02052	8.92973	9.72074	9.62341	8.91584	8.93554	9.11855	9.14007	9.28794	turquoise	-0.687372	0.90555	0.922067	0.385247	0.483742	-0.702985	-0.168581	0.512144	0.267061	0.0600462	7.46304e-05	8.48236e-11	8.40818e-12	0.0472074	0.0105739	4.32834e-05	0.400592	0.00631387	0.178097	0.766074
D-dichotoma_M_contig92.19939.1	OG0010105	3.17858	2.64168	0	0	0	0	4.67601	5.13421	5.22156	5.55175	6.16643	6.18557	3.66573	2.76041	4.17768	2.56836	2.72989	2.66204	2.88112	2.90473	1.38613	0	3.90816	2.73056	2.50047	2.15336	0.609128	blue	-0.239572	0.674419	0.437395	0.568534	0.246354	-0.30414	0.0253178	0.15595	-0.102961	0.578764	0.228755	0.000114451	0.0225168	0.00197379	0.215448	0.122981	0.900246	0.437296	0.609317	0.00156282
D-dichotoma_M_contig112.1027.1	OG0010106	4.6532	5.01986	4.93537	8.80709	6.7211	8.91297	5.81423	2.5544	4.04982	5.31632	4.97057	5.04021	0	0	0.776001	0.242014	0	0	1.67299	1.35967	0	1.31727	0.230207	3.11545	0	3.23359	4.51106	green	0.952589	-0.249471	-0.767057	0.438815	0.153658	0.0397766	-0.177454	-0.421175	-0.813579	0.0565462	1.99185e-14	0.209514	3.05077e-06	0.0220329	0.444145	0.843841	0.375886	0.0286801	2.47312e-07	0.779368
D-dichotoma_M_contig113.1082.1	OG0010107	0	0	0	0	0	0	0	0	0	0	0	0	0	0	0	0	0	0	0.261803	0	0	0	0	0	0.302097	0	0	NA	NA	NA	NA	NA	NA	NA	NA	NA	NA	NA	NA	NA	NA	NA	NA	NA	NA	NA	NA	NA
D-dichotoma_M_contig2901.10041.1	OG0000707	8.54757	8.78532	8.60735	8.59129	7.20261	8.85538	9.67549	8.69805	9.54687	10.4723	10.6066	10.5358	10.9172	10.7191	10.5408	10.9532	10.3886	10.2819	10.5959	10.9083	11.2285	10.4726	10.849	10.8827	10.626	10.5739	10.9987	turquoise	-0.706224	0.211013	0.71122	-0.370251	0.0294597	0.213061	0.428997	0.657296	0.797435	0.467144	3.84924e-05	0.290727	3.20232e-05	0.0572977	0.884028	0.28596	0.0255566	0.000195292	6.35844e-07	0.0140223
D-dichotoma_M_contig2901.10042.1	OG0010108	4.30692	5.23588	3.77451	7.50803	4.45286	8.14953	5.64751	4.35734	2.62933	3.9189	4.97057	4.0834	0.966698	0.336329	1.72911	0	0	0	1.76031	0.533566	0	0	0.428685	1.79923	0.551757	3.88699	4.60748	green	0.919044	-0.176983	-0.688072	0.469247	0.169684	-0.0421885	-0.143167	-0.298033	-0.797485	0.0250837	1.33061e-11	0.377173	7.28818e-05	0.0135396	0.397472	0.834497	0.476219	0.13107	6.34081e-07	0.901164
D-dichotoma_M_contig2901.10046.1	OG0010109	1.88155	3.52119	0	6.90449	6.40259	8.4895	2.8361	2.5544	0	2.17994	4.40844	3.16609	0	0	0.617565	0	0	0	0.261803	0.533566	0	0	0.428685	0.927471	0	2.90037	4.15468	green	0.912234	-0.521994	-0.850012	0.127336	-0.0249165	0.33554	0.0429884	-0.437285	-0.616523	0.118427	3.51722e-11	0.00522591	2.01184e-08	0.526776	0.90182	0.0870764	0.831403	0.0225545	0.000615743	0.556314
D-dichotoma_M_contig2911.10077.1	OG0000708	6.95996	6.92521	7.17754	8.99477	9.55727	9.28426	7.64802	7.15333	8.05288	8.63122	8.80152	8.04555	7.88271	7.31095	8.35355	7.34553	6.3519	6.9161	6.9139	7.11019	7.9513	7.83853	6.49893	7.41989	7.16781	6.79624	8.73203	turquoise	0.654294	-0.47847	-0.700642	0.0329949	-0.0367604	0.413216	0.0823357	-0.472563	-0.42894	0.313912	0.000213747	0.0115826	4.70728e-05	0.870221	0.855555	0.0321673	0.683069	0.0128066	0.0255784	0.110811
D-dichotoma_M_contig2911.10078.1	OG0010110	4.49042	5.58992	6.6184	7.41545	6.98185	8.19667	5.24204	5.13421	7.24255	7.04068	8.04476	7.80948	5.12432	4.8095	6.20982	5.68908	5.70479	5.17237	4.62516	4.88948	6.02563	5.88717	4.29898	4.75118	4.36223	4.50903	6.6136	turquoise	0.592318	-0.223799	-0.582697	0.302519	0.293041	0.194709	-0.0794472	-0.318535	-0.604806	0.395391	0.00113343	0.261789	0.00142578	0.125092	0.137963	0.330444	0.693648	0.105375	0.000832376	0.0412176
D-dichotoma_M_contig2912.10083.1	OG0000709	8.00027	8.91628	8.81122	4.56247	0	3.38293	7.24271	8.47905	8.28653	9.66121	10.3512	9.64135	9.47815	7.09245	7.64079	7.92699	8.34361	9.13436	8.06944	8.74043	9.45901	9.95368	8.7437	8.70397	7.62642	8.53559	9.95312	turquoise	-0.645525	0.733011	0.853971	0.239805	0.471682	-0.470714	-0.0470481	0.659178	0.342361	0.274122	0.00027672	1.37009e-05	1.47283e-08	0.228289	0.0129982	0.0132112	0.815738	0.000184455	0.0804557	0.166465
D-dichotoma_M_contig1145.1207.1	OG0010111	6.34946	5.87397	7.04524	4.56247	0	5.84779	6.33684	6.00821	6.97152	6.59016	6.52453	6.33559	5.57784	6.10298	5.44508	6.65163	6.36379	5.91799	5.62501	5.78523	6.3013	6.07449	5.26186	5.96711	5.40811	6.49214	6.1471	turquoise	-0.38245	0.626036	0.635496	0.324278	0.520169	-0.480734	-0.105138	0.809294	0.122831	0.125637	0.0489744	0.000477806	0.000368232	0.0989004	0.0054146	0.0111401	0.601731	3.20499e-07	0.54162	0.53235
D-dichotoma_M_contig1146.1209.1	OG0010112	5.16596	4.06365	4.46868	0	0	0	2.02518	3.42606	5.72449	4.87041	5.68902	3.16609	3.95922	3.82038	4.51763	3.2329	3.35612	3.35841	4.82068	4.57426	4.48429	3.31493	4.63659	3.11545	2.55867	3.09489	3.89931	turquoise	-0.583222	0.774582	0.771648	0.343509	0.358299	-0.544854	-0.179901	0.381833	0.198539	0.186351	0.00140828	2.11571e-06	2.4442e-06	0.0793801	0.0664832	0.0032958	0.36923	0.0493711	0.320831	0.352021
D-dichotoma_M_contig1146.1211.1	OG0010113	4.49042	5.01986	6.26884	0	0	0	2.8361	4.35734	3.50777	2.17994	4.97057	0	5.20119	3.58817	4.85603	3.9979	4.21554	4.11005	5.03722	5.63743	5.38362	4.45201	4.34882	3.64382	2.66846	3.90786	4.97588	turquoise	-0.663366	0.540937	0.755209	-0.00492137	0.205538	-0.502474	-0.22292	0.439401	0.408267	-0.251033	0.000162214	0.00357476	5.2867e-06	0.980564	0.303713	0.00756207	0.263716	0.0218359	0.0345023	0.20658
D-dichotoma_M_contig1147.1215.1	OG0010114	3.85035	4.76569	0	0	0	0	4.4914	2.5544	3.50777	3.01127	0	3.16609	0	1.50476	1.27784	0.630339	0	0	0.483315	0.922202	0	0.457315	0	0.745413	0.551757	0	0	NA	NA	NA	NA	NA	NA	NA	NA	NA	NA	NA	NA	NA	NA	NA	NA	NA	NA	NA	NA	NA
D-dichotoma_M_contig1148.1217.1	OG0000710	7.80627	7.88768	8.23462	2.73491	4.45286	0	7.08851	7.33851	8.13504	8.07352	8.59052	8.61408	7.1928	7.77936	7.61481	7.99777	7.73972	7.91347	7.52713	8.12822	8.36899	7.76127	7.67684	7.6167	7.58326	7.90709	7.95824	blue	-0.732836	0.80747	0.886454	0.260618	0.433333	-0.514793	-0.0539353	0.245117	0.362926	0.217073	1.37987e-05	3.57185e-07	7.61933e-10	0.189198	0.0239481	0.00600407	0.789324	0.217835	0.0628007	0.27677
D-dichotoma_M_contig1150.1245.1	OG0010115	5.5435	4.45696	4.46868	4.56247	4.45286	0	7.43416	5.48762	6.09669	6.23186	4.97057	6.01812	3.66573	4.9752	2.74395	3.57997	4.00892	4.65088	3.91908	3.60734	4.0991	4.76069	3.61414	3.71986	3.39922	3.3295	3.55697	brown	-0.0494644	0.630954	0.223699	0.680633	0.478596	-0.519361	-0.373525	-0.199229	-0.343636	0.218027	0.806447	0.000417731	0.262008	9.3472e-05	0.0115575	0.00549987	0.0549622	0.319117	0.0792615	0.274613
D-dichotoma_M_contig1060.571.1	OG0010116	4.79946	4.45696	3.24132	0	0	0	5.64751	4.66512	2.62933	5.43883	4.97057	5.04021	0	1.03574	0	0	0	0	0.261803	0.533566	0	0	1.14471	0	0.302097	0.281597	0	brown	0.213245	0.720054	0.0978336	0.967325	0.560558	-0.653951	-0.372372	-0.120821	-0.674083	0.279479	0.285536	2.29121e-05	0.627342	2.05603e-16	0.00235575	0.000215949	0.0557763	0.548303	0.000115696	0.158005
D-dichotoma_M_contig1060.575.1	OG0000016	7.41055	7.78858	7.94393	0	0	0	7.32789	7.54087	7.47063	7.28891	7.9884	8.21002	2.64362	4.08873	4.26045	3.94755	4.83259	3.3184	3.64854	2.90473	4.60878	3.69326	3.29619	2.91438	4.31235	4.06474	3.68033	blue	-0.210255	0.943426	0.517806	0.855453	0.723592	-0.825835	-0.348305	0.130303	-0.359386	0.199021	0.292503	1.72484e-13	0.0056673	1.30755e-08	1.9967e-05	1.13449e-07	0.0750052	0.51711	0.0656034	0.319633
D-dichotoma_M_contig1061.584.1	OG0010117	8.95905	8.97755	8.35129	7.50803	5.99322	7.63713	8.61082	8.17283	8.18733	8.51068	7.15635	7.32663	6.67809	7.09799	6.37061	7.77528	7.82536	6.77912	6.43231	6.32164	9.28146	8.86106	6.25932	6.48204	6.81176	8.00838	8.2322	magenta	0.0741542	0.406029	0.114754	0.483944	0.805091	-0.632854	-0.441739	0.161283	-0.364927	-0.208786	0.713179	0.0356018	0.568711	0.0105368	4.10731e-07	0.000396355	0.0210639	0.421583	0.0612584	0.295967
D-dichotoma_M_contig1061.585.1	OG0010118	5.05383	4.06365	4.93537	4.16764	4.45286	0	3.35209	5.32171	4.04982	2.17994	0	3.16609	5.67536	5.40876	4.49502	4.79953	5.11182	5.19464	5.14661	5.24485	3.95642	3.60757	6.10832	5.44681	5.32672	4.74764	4.40772	turquoise	-0.493712	0.0814283	0.417415	-0.360558	-0.336303	-0.133788	0.109757	0.112911	0.519382	-0.503766	0.00886608	0.686386	0.0302872	0.0646655	0.0863163	0.505867	0.585768	0.574976	0.00549769	0.00738418
D-dichotoma_M_contig1062.591.1	OG0010119	2.67116	2.64168	0	0	0	0	2.8361	0	2.62933	3.9189	3.47482	0	3.18778	5.09086	3.84369	4.83689	4.59767	4.17869	4.4259	3.80504	3.57203	4.81905	4.69557	4.75118	4.36223	4.41012	4.04417	NA	NA	NA	NA	NA	NA	NA	NA	NA	NA	NA	NA	NA	NA	NA	NA	NA	NA	NA	NA	NA
D-dichotoma_M_contig1063.597.1	OG0010120	4.6532	0	0	4.16764	0	0	4.4914	2.5544	2.62933	3.9189	0	4.0834	2.26827	2.81525	0.776001	1.83066	0	2.30066	2.06475	2.39267	1.38613	0.804027	2.31588	1.88979	1.73524	2.08171	2.05381	NA	NA	NA	NA	NA	NA	NA	NA	NA	NA	NA	NA	NA	NA	NA	NA	NA	NA	NA	NA	NA
D-dichotoma_M_contig1217.1748.1	OG0010121	5.90842	5.58992	5.43573	9.29679	10.0015	9.68225	6.16229	6.30356	6.47874	7.11606	7.59426	7.32663	4.44343	3.89866	6.29081	5.37031	5.62139	4.20087	5.24072	4.64047	4.31917	3.20252	6.04547	3.69496	3.33406	5.65416	4.38976	turquoise	0.833487	-0.409607	-0.84198	0.270377	-0.0445148	0.298202	-0.04452	-0.555386	-0.721321	0.196589	6.76042e-08	0.033857	3.68904e-08	0.172567	0.825505	0.130841	0.825485	0.00263595	2.18153e-05	0.325705
D-dichotoma_M_contig1217.1749.1	OG0010122	4.49042	2.64168	5.12211	6.76137	7.97613	7.49351	2.02518	4.91865	4.75152	4.22163	6.16643	5.04021	2.52902	1.74969	3.30812	3.51231	3.86014	2.30066	2.95702	2.56621	2.21131	2.12329	4.18009	1.08911	1.51777	3.90786	2.91967	turquoise	0.764565	-0.393186	-0.791492	0.238158	0.0184493	0.225992	-0.0772707	-0.548047	-0.702547	0.113329	3.4337e-06	0.0424656	8.8156e-07	0.231597	0.927225	0.257019	0.701657	0.00308226	4.39711e-05	0.573553
D-dichotoma_M_contig1217.1750.1	OG0010123	5.16596	5.01986	5.80653	7.89846	8.848	9.07312	4.83965	5.13421	6.71078	5.31632	6.67497	7.46331	3.33148	3.64982	4.51763	4.41097	4.66329	2.38054	4.16293	3.43897	4.25964	3.65105	4.67618	2.46197	3.11883	5.20083	3.61997	turquoise	0.812435	-0.347943	-0.814728	0.33109	0.124396	0.179001	-0.118845	-0.553055	-0.78209	0.135968	2.65199e-07	0.0753281	2.30446e-07	0.0916135	0.53644	0.371669	0.554913	0.00277126	1.44791e-06	0.498894
D-dichotoma_M_contig2164.7170.1	OG0010124	0	0	0	2.73491	0	0	0	0	0	0	0	0	0	0.336329	0.236455	0	0	0.356693	0	0	0	0	0.230207	0.927471	0.302097	0	0	NA	NA	NA	NA	NA	NA	NA	NA	NA	NA	NA	NA	NA	NA	NA	NA	NA	NA	NA	NA	NA
D-dichotoma_M_contig2165.7175.1	OG0010125	5.97151	7.10071	4.72082	0	0	0	5.35458	6.82155	6.78051	7.84886	4.97057	7.85989	0	0	0	0	0	0	0	0	0	0	0	0	0	0	0	brown	0.237695	0.707571	0.0651674	0.977367	0.607942	-0.704459	-0.428625	-0.151982	-0.727227	0.199349	0.232532	3.66433e-05	0.746741	2.20392e-18	0.000768723	4.10407e-05	0.0256985	0.44919	1.72968e-05	0.31882
D-dichotoma_M_contig2169.7184.1	OG0010126	3.17858	0	0	6.42387	4.45286	5.27529	2.8361	2.5544	0	3.01127	0	3.16609	1.41691	3.61932	1.47557	5.17991	1.79866	3.57761	4.84085	3.95827	2.54629	2.45307	4.00462	6.80365	6.13302	5.55843	3.76639	blue	0.199522	-0.607609	-0.286263	-0.576917	-0.529334	0.634985	0.446629	0.0435722	0.344448	0.00201568	0.318393	0.000775275	0.147736	0.00163102	0.00452245	0.000373527	0.0195211	0.829146	0.0785084	0.992039
D-dichotoma_M_contig232.7862.1	OG0010127	0	0	0	0	0	0	0	0	0	0	3.47482	0	0.966698	1.03574	0	0.449203	0	0	0.261803	0	0	0	1.44892	1.70259	1.11415	0.517103	0.609128	NA	NA	NA	NA	NA	NA	NA	NA	NA	NA	NA	NA	NA	NA	NA	NA	NA	NA	NA	NA	NA
D-dichotoma_M_contig233.7898.1	OG0010128	0	0	2.38634	0	0	0	0	0	0	0	0	0	1.13287	0	0	0.449203	0	0	0	0	0	0	0.603131	0.537017	0	0	0.336476	NA	NA	NA	NA	NA	NA	NA	NA	NA	NA	NA	NA	NA	NA	NA	NA	NA	NA	NA	NA	NA
D-dichotoma_M_contig233.7899.1	OG0010129	7.16279	6.65207	6.9983	2.73491	0	0	7.85351	6.11352	8.18733	7.95533	7.66789	7.09375	8.10402	8.43015	8.66719	8.52472	8.32243	7.87607	8.63719	8.12938	7.80021	7.76127	8.57856	8.17352	7.47787	7.9754	7.84083	turquoise	-0.811932	0.708051	0.961332	0.0643956	0.269362	-0.3714	0.0875807	0.613556	0.57809	0.192369	2.73425e-07	3.60033e-05	1.63388e-15	0.749645	0.174246	0.0564695	0.664009	0.000665328	0.00158741	0.336401
D-dichotoma_M_contig181.5353.1	OG0010130	0	0	0	0	0	0	2.8361	2.5544	0	2.17994	0	0	3.89125	3.89866	4.79255	3.76578	3.6431	4.71391	4.94703	5.11114	2.33182	3.51646	2.31588	4.19868	4.15148	3.41944	3.10725	NA	NA	NA	NA	NA	NA	NA	NA	NA	NA	NA	NA	NA	NA	NA	NA	NA	NA	NA	NA	NA
D-dichotoma_M_contig182.5388.1	OG0010131	1.88155	0	0	9.05738	10.3173	9.23994	2.8361	2.5544	4.04982	6.16243	7.43467	6.59564	7.14982	5.72029	6.74581	6.77224	7.33098	6.66412	6.69311	7.42017	7.23917	6.38892	7.4544	6.39967	5.47008	7.05431	7.2656	blue	0.135724	-0.762734	-0.398332	-0.6815	-0.445938	0.935874	0.489437	-0.152796	0.354277	0.415148	0.499673	3.7421e-06	0.0395993	9.08317e-05	0.0197335	7.92595e-13	0.00956761	0.446737	0.0698179	0.0312911
D-dichotoma_M_contig183.5426.1	OG0010132	6.52795	7.56728	6.55494	0	0	0	7.96408	7.54087	6.84703	8.90006	8.83387	8.97583	2.46812	5.49527	4.89109	4.07809	5.35364	2.66204	4.57787	3.80504	0.488969	2.12329	2.31588	3.03835	4.51702	1.75315	1.6329	blue	-0.144377	0.850786	0.410595	0.835722	0.498443	-0.630185	-0.230604	0.0798299	-0.370376	0.340884	0.47246	1.89424e-08	0.0333874	5.78333e-08	0.0081404	0.000426662	0.247178	0.692243	0.0572069	0.0818558
D-dichotoma_M_contig183.5427.1	OG0000103	8.13036	8.06754	7.67213	0	0	0	7.73376	7.33851	7.93551	9.25721	8.6279	8.88139	7.9371	6.44046	6.78827	6.38149	5.30513	4.38644	4.69332	4.13402	3.04648	4.54714	7.35576	5.83657	6.65386	5.67865	5.20889	blue	-0.423771	0.909862	0.706814	0.622965	0.457168	-0.644487	0.0292193	0.287019	-0.0187007	0.28951	0.0276111	4.84442e-11	3.7672e-05	0.000519041	0.0165095	0.000285161	0.884968	0.146622	0.926236	0.142994
D-dichotoma_M_contig183.5429.1	OG0010133	6.25119	5.23588	5.28743	0	0	0	4.27966	3.96558	5.22156	6.16243	4.97057	5.35334	5.3854	4.17513	4.65654	4.32156	5.26341	4.1333	3.2564	2.72111	2.33182	4.61459	5.50108	4.19868	5.08082	4.18928	4.06696	turquoise	-0.580267	0.846092	0.798766	0.431506	0.41679	-0.603871	0.0761754	0.370539	0.177246	0.181579	0.00150917	2.71617e-08	5.90106e-07	0.0246156	0.0305613	0.000852209	0.705699	0.0570886	0.376455	0.364706
D-dichotoma_M_contig2378.8090.1	OG0010134	5.7007	5.23588	5.12211	0	0	0	6.95207	4.91865	4.44292	5.93152	4.40844	5.35334	2.84867	3.10663	4.2058	2.73594	1.97442	2.30066	3.22605	2.81584	0	1.08335	1.97858	3.41898	3.52131	0.896975	2.30452	blue	-0.116577	0.848865	0.43533	0.800607	0.360018	-0.691798	-0.235843	0.106994	-0.325296	0.160412	0.562543	2.1985e-08	0.0232355	5.3176e-07	0.0650967	6.4168e-05	0.236299	0.595295	0.0977852	0.424129
D-dichotoma_M_contig2378.8091.1	OG0010135	4.49042	5.23588	2.38634	0	0	0	6.63305	5.48762	6.09669	6.36144	3.47482	4.63971	1.54039	3.31127	2.7818	3.2329	2.51919	1.56726	2.91957	2.81584	1.77427	1.51849	1.44892	2.13168	2.72037	2.00632	2.704	blue	-0.11187	0.844467	0.43684	0.791023	0.58239	-0.69889	-0.293809	0.106082	-0.31314	0.204919	0.578527	3.06861e-08	0.0227079	9.04195e-07	0.00143607	5.00957e-05	0.136884	0.598454	0.111739	0.305204
D-dichotoma_M_contig2378.8092.1	OG0000041	2.67116	2.64168	0	0	0	0	4.67601	0	0	4.22163	4.40844	0	2.46812	2.81525	2.34941	3.2046	3.56284	1.42381	2.42693	2.39267	1.38613	1.31727	2.26486	2.91438	2.61461	2.2868	1.75018	NA	NA	NA	NA	NA	NA	NA	NA	NA	NA	NA	NA	NA	NA	NA	NA	NA	NA	NA	NA	NA
D-dichotoma_M_contig2379.8097.1	OG0000006	7.21586	6.49329	5.43573	5.69807	6.40259	5.27529	6.80136	4.91865	5.72449	5.7541	4.40844	5.04021	4.22154	4.8095	3.47915	4.0624	3.11475	4.30689	5.08874	5.02454	4.60878	4.18247	4.5751	4.51551	4.75962	4.22298	4.31558	green	0.570594	0.129871	-0.415808	0.587969	0.0985651	-0.370926	-0.499349	-0.459096	-0.718894	-0.235875	0.0018843	0.518512	0.0309961	0.00125841	0.624758	0.0568098	0.00800728	0.0160024	2.39587e-05	0.236235
D-dichotoma_M_contig2379.8098.1	OG0000006	6.48535	5.23588	5.12211	6.32554	4.45286	3.38293	5.64751	2.5544	5.72449	4.68479	4.40844	3.16609	3.18778	3.87303	3.45592	3.62338	1.48692	2.95079	4.87059	4.74046	0.488969	1.99417	4.06551	3.81538	3.90459	3.0202	2.05381	grey	0.452711	0.119559	-0.292019	0.464142	-0.15639	-0.181434	-0.234762	-0.200755	-0.52065	-0.111082	0.0177327	0.552519	0.139404	0.0147356	0.435988	0.365096	0.238518	0.315349	0.0053643	0.581222
D-dichotoma_M_contig2379.8099.1	OG0010136	6.03195	2.64168	3.77451	3.62227	0	4.87262	4.27966	3.42606	2.62933	4.22163	0	3.16609	1.94975	3.06197	2.88975	3.26066	3.44836	2.38054	4.28576	3.89458	1.14426	2.3513	3.89144	2.9569	2.61461	3.05803	2.58273	grey	0.120704	0.138501	0.0579564	0.171232	-0.0772074	-0.210583	-0.120887	0.433534	-0.0933404	-0.26941	0.548695	0.490855	0.774004	0.393116	0.70189	0.291733	0.548083	0.0238753	0.643311	0.174167
D-dichotoma_M_contig2382.8120.1	OG0000711	8.77679	9.2747	9.36767	14.6983	13.8552	14.5044	9.60329	9.65329	10.1245	11.3734	12.3808	12.1809	10.4908	9.34255	10.4049	10.4393	10.4323	9.65263	9.9581	10.4582	10.0798	9.57767	10.3755	9.85688	9.582	10.158	10.1683	turquoise	0.719343	-0.710664	-0.863661	-0.122715	-0.244568	0.679095	0.194974	-0.410618	-0.409508	0.336495	2.3549e-05	3.2691e-05	6.5961e-09	0.542004	0.218902	9.83182e-05	0.329774	0.0333765	0.0339042	0.0861257
D-dichotoma_M_contig2387.8139.1	OG0010137	0	0	0	0	0	0	0	0	0	2.17994	0	0	0	0	0	0	0	0	0.6753	0	0	0	1.2534	1.23445	1.51777	1.05499	0	NA	NA	NA	NA	NA	NA	NA	NA	NA	NA	NA	NA	NA	NA	NA	NA	NA	NA	NA	NA	NA
D-dichotoma_M_contig2234.7464.1	OG0010138	0	0	0	3.62227	0	0	4.67601	4.35734	0	5.55175	4.40844	3.16609	5.64817	5.88317	5.46267	6.19985	5.92412	5.23817	5.88025	6.07104	3.47067	3.81295	5.21559	5.63531	4.29534	4.89077	4.91438	turquoise	-0.563061	0.0417393	0.517331	-0.434145	-0.212307	0.370272	0.470955	0.493008	0.759423	0.415543	0.0022296	0.836236	0.00571934	0.0236561	0.28771	0.0572822	0.0131578	0.00897848	4.3633e-06	0.0311139
D-dichotoma_M_contig2237.7473.1	OG0010139	4.6532	0	4.16295	4.56247	4.45286	0	3.35209	3.42606	4.04982	4.68479	4.40844	5.04021	5.10445	5.5848	5.37251	6.21766	5.69227	5.06766	5.28557	5.21908	4.0991	4.09071	6.56895	6.01317	5.91644	6.57601	5.45335	yellow	-0.480946	0.0293311	0.443161	-0.408003	-0.209404	0.304377	0.540336	0.169639	0.674403	0.2793	0.0110994	0.884531	0.0206053	0.0346306	0.294507	0.122676	0.00361931	0.397599	0.000114512	0.158282
D-dichotoma_M_contig2237.7474.1	OG0010140	3.17858	2.64168	0	3.62227	6.98185	0	2.8361	3.42606	3.50777	3.01127	0	4.0834	4.49013	5.25855	4.57265	5.03474	4.23294	4.94166	5.41231	5.19284	2.81795	3.81295	4.89329	4.8219	4.37847	4.39542	3.45699	grey	-0.329341	-0.229686	0.133459	-0.518994	-0.469558	0.364497	0.27496	-0.214881	0.547028	-0.0649713	0.0934447	0.249116	0.506922	0.00553905	0.0134694	0.0615876	0.165121	0.281767	0.0031491	0.747478
D-dichotoma_M_contig2237.7475.1	OG0010141	0	0	0	0	0	0	2.02518	0	0	0	0	0	4.12621	1.36471	1.56513	2.37873	0	0.356693	3.84111	3.91613	0.853502	0	4.15229	4.97455	4.39454	4.22298	2.22569	NA	NA	NA	NA	NA	NA	NA	NA	NA	NA	NA	NA	NA	NA	NA	NA	NA	NA	NA	NA	NA
D-dichotoma_M_contig189.5699.1	OG0010142	0	0	0	0	0	0	0	0	0	2.17994	0	0	2.11778	3.52376	2.18963	3.26066	3.6431	2.30066	3.28614	2.94721	0	2.3513	2.21197	3.74434	2.31031	3.65983	3.3119	NA	NA	NA	NA	NA	NA	NA	NA	NA	NA	NA	NA	NA	NA	NA	NA	NA	NA	NA	NA	NA
D-dichotoma_M_contig190.5767.1	OG0010143	0	0	0	2.73491	4.45286	3.38293	0	0	0	0	0	5.04021	1.94975	3.52376	3.40832	2.37873	3.81465	2.7246	2.80101	2.39267	0	1.08335	2.98552	3.50745	2.43983	2.46632	1.95953	NA	NA	NA	NA	NA	NA	NA	NA	NA	NA	NA	NA	NA	NA	NA	NA	NA	NA	NA	NA	NA
D-dichotoma_M_contig190.5770.1	OG0010144	0	2.64168	3.24132	6.22001	4.45286	5.27529	0	0	0	0	0	0	1.85778	0	0.236455	0	0	1.69773	0	0.533566	1.38613	2.80069	0.230207	0.927471	0	0.281597	2.37926	turquoise	0.626698	-0.717547	-0.787463	-0.248741	-0.252126	0.337647	-0.115356	-0.327893	-0.354354	-0.356592	0.0004693	2.52271e-05	1.09373e-06	0.210894	0.204545	0.0849892	0.566669	0.0949817	0.0697531	0.0678828
D-dichotoma_M_contig190.5771.1	OG0010145	0	0	0	0	0	0	0	0	0	0	0	0	0	0	0	0	0	0	0	0.29131	0	0	0	0	0.302097	0	0	NA	NA	NA	NA	NA	NA	NA	NA	NA	NA	NA	NA	NA	NA	NA	NA	NA	NA	NA	NA	NA
D-dichotoma_M_contig191.5817.1	OG0010146	0	0	0	8.633	7.20261	9.38945	0	0	0	0	0	0	0	0	0.617565	0.242014	0	0	0.996303	0	0.488969	0	0	1.36647	0	4.22298	4.68318	green	0.796202	-0.848876	-0.86675	-0.346369	-0.29874	0.592637	0.194356	-0.345222	-0.270216	-0.123112	6.8106e-07	2.19658e-08	5.04032e-09	0.0767482	0.130114	0.00112469	0.331339	0.0777955	0.172831	0.540687
D-dichotoma_M_contig191.5825.1	OG0010147	0	2.64168	2.38634	0	0	0	3.35209	0	5.22156	4.47172	6.35656	6.33559	2.26827	2.37869	2.34941	2.32715	2.13107	2.59664	2.25718	2.12309	0.853502	0.804027	3.13507	3.11545	1.6306	2.81457	2.22569	blue	-0.180223	0.552761	0.400501	0.440843	0.376512	-0.117091	0.168912	0.140294	-0.0200473	0.725248	0.36836	0.00278878	0.0384385	0.0213573	0.052898	0.560809	0.399655	0.485203	0.92094	1.87081e-05
D-dichotoma_M_contig191.5826.1	OG0010148	7.77124	9.06485	8.31344	4.56247	4.45286	4.87262	8.67725	7.84605	9.38839	10.2643	10.9762	10.2543	6.7502	6.74589	6.3768	6.97645	6.66229	6.34375	6.54419	6.92337	6.42838	6.55264	7.82728	7.00449	7.0383	7.28116	7.05945	blue	-0.138562	0.849482	0.465052	0.798574	0.645324	-0.57119	-0.118509	0.131964	-0.298259	0.526061	0.490662	2.09631e-08	0.0145163	5.96523e-07	0.000278338	0.00185906	0.556041	0.511737	0.130763	0.00482551
D-dichotoma_M_contig191.5831.1	OG0010149	0	0	0	6.42387	8.848	6.25655	0	0	0	0	0	3.16609	0	0	0.439558	0	0	0	0.261803	0.533566	0	0	1.02717	1.48742	0	1.92676	3.10725	turquoise	0.786458	-0.800174	-0.899243	-0.255037	-0.325936	0.607651	0.193289	-0.600229	-0.346267	-0.00442583	1.15333e-06	5.44987e-07	1.8374e-10	0.19919	0.0970883	0.000774446	0.334053	0.000933457	0.0768406	0.98252
D-dichotoma_M_contig46.14502.1	OG0010150	5.84245	4.06365	5.80653	0	0	0	5.89089	7.05099	7.08611	7.04068	8.04476	6.70997	6.1909	6.07516	6.57846	6.50847	6.55573	6.45863	6.63074	6.98582	5.28257	5.09574	6.7281	5.88692	5.09072	5.81194	6.11465	turquoise	-0.699463	0.806536	0.898396	0.276211	0.349267	-0.439538	0.00411319	0.470582	0.372289	0.343045	4.90888e-05	3.77407e-07	2.03043e-10	0.163128	0.0741498	0.0217902	0.983755	0.0132404	0.0558354	0.0798135
D-dichotoma_M_contig46.14503.1	OG0010151	3.55322	3.52119	5.80653	0	0	0	3.73137	5.13421	5.22156	5.93152	6.67497	6.01812	6.58075	5.59267	6.70206	6.62785	6.11446	6.02128	6.26695	6.52811	5.52937	5.27319	6.45693	6.16596	5.15815	6.00345	5.9281	turquoise	-0.813866	0.621875	0.919378	-0.0138586	0.208054	-0.234491	0.184378	0.528528	0.608065	0.326181	2.4299e-07	0.000534405	1.26601e-11	0.945302	0.2977	0.239077	0.357234	0.00459554	0.000766314	0.0968224
[truncated: 19,507 more rows]
